# Supplementary material for: ScholarLens: extracting competences from research publications for the automatic generation of semantic user profiles
Source: PeerJ journal article supplement (doi:10.7717/peerj-cs.121), 2017-07-03
Supplement: Pipeline.zip [file Pipeline.zip]

Archive with 599 entries (523 files):
- Pipeline/
- Pipeline/COPYING
- Pipeline/lodexporter/
- Pipeline/lodexporter/semantic_profiling_mapping_anonymized.rdf
- Pipeline/README.md
- Pipeline/COPYING.LESSER
- Pipeline/gate/
- Pipeline/gate/COPYING
- Pipeline/gate/application-resources/
- Pipeline/gate/application-resources/grammars/
- Pipeline/gate/application-resources/grammars/ignoredContent.jape
- Pipeline/gate/application-resources/grammars/creator_uri.jape
- Pipeline/gate/application-resources/grammars/creator_competency_relation.jape
- Pipeline/gate/application-resources/grammars/removedDBpediaNEs.jape
- Pipeline/gate/application-resources/grammars/dbpne_filter.jape
- Pipeline/gate/SemanticProfilingDemo.xgapp
- Pipeline/gate/plugins/
- Pipeline/gate/plugins/TextMining-MuNPEx/
- Pipeline/gate/plugins/TextMining-MuNPEx/COPYING
- Pipeline/gate/plugins/TextMining-MuNPEx/version.properties
- Pipeline/gate/plugins/TextMining-MuNPEx/build.xml
- Pipeline/gate/plugins/TextMining-MuNPEx/doc/
- Pipeline/gate/plugins/TextMining-MuNPEx/doc/munpex.pdf
- Pipeline/gate/plugins/TextMining-MuNPEx/test/
- Pipeline/gate/plugins/TextMining-MuNPEx/test/src/
- Pipeline/gate/plugins/TextMining-MuNPEx/test/src/info/
- Pipeline/gate/plugins/TextMining-MuNPEx/test/src/info/semanticsoftware/
- Pipeline/gate/plugins/TextMining-MuNPEx/test/src/info/semanticsoftware/munpex/
- Pipeline/gate/plugins/TextMining-MuNPEx/test/src/info/semanticsoftware/munpex/MuNPExTest_EN.java
- Pipeline/gate/plugins/TextMining-MuNPEx/build.properties
- Pipeline/gate/plugins/TextMining-MuNPEx/resources/
- Pipeline/gate/plugins/TextMining-MuNPEx/resources/np-entities.jape
- Pipeline/gate/plugins/TextMining-MuNPEx/resources/en-np-parts.jape
- Pipeline/gate/plugins/TextMining-MuNPEx/resources/fr-np-parts.jape
- Pipeline/gate/plugins/TextMining-MuNPEx/resources/de-np-parts.jape
- Pipeline/gate/plugins/TextMining-MuNPEx/resources/en-np_main.jape
- Pipeline/gate/plugins/TextMining-MuNPEx/resources/clean.jape
- Pipeline/gate/plugins/TextMining-MuNPEx/resources/fr-np_main.jape
- Pipeline/gate/plugins/TextMining-MuNPEx/resources/np.jape
- Pipeline/gate/plugins/TextMining-MuNPEx/resources/de-np_main.jape
- Pipeline/gate/plugins/TextMining-MuNPEx/resources/es-np_main.jape
- Pipeline/gate/plugins/TextMining-MuNPEx/resources/check.jape
- Pipeline/gate/plugins/TextMining-MuNPEx/resources/es-np-parts.jape
- Pipeline/gate/plugins/TextMining-MuNPEx/README.md
- Pipeline/gate/plugins/TextMining-MuNPEx/COPYING.LESSER
- Pipeline/gate/plugins/TextMining-MuNPEx/buildtest.xml
- Pipeline/gate/plugins/TextMining-MuNPEx/README
- Pipeline/gate/plugins/TextMining-MuNPEx/MuNPEx.jar
- Pipeline/gate/plugins/TextMining-MuNPEx/optional/
- Pipeline/gate/plugins/TextMining-MuNPEx/optional/de-lemma.jape
- Pipeline/gate/plugins/TextMining-MuNPEx/optional/treetagger-lemma.jape
- Pipeline/gate/plugins/TextMining-MuNPEx/optional/en-lemma.jape
- Pipeline/gate/plugins/TextMining-MuNPEx/creole.xml
- Pipeline/gate/plugins/ANNIE/
- Pipeline/gate/plugins/ANNIE/build.xml
- Pipeline/gate/plugins/ANNIE/resources/
- Pipeline/gate/plugins/ANNIE/resources/othomatcher/
- Pipeline/gate/plugins/ANNIE/resources/othomatcher/nickname.txt
- Pipeline/gate/plugins/ANNIE/resources/othomatcher/connnector.lst
- Pipeline/gate/plugins/ANNIE/resources/othomatcher/listsNM.def
- Pipeline/gate/plugins/ANNIE/resources/othomatcher/alias_ace.lst
- Pipeline/gate/plugins/ANNIE/resources/othomatcher/spur_match.lst
- Pipeline/gate/plugins/ANNIE/resources/othomatcher/cdg.lst
- Pipeline/gate/plugins/ANNIE/resources/othomatcher/def_art.lst
- Pipeline/gate/plugins/ANNIE/resources/othomatcher/acelists.def
- Pipeline/gate/plugins/ANNIE/resources/othomatcher/chinese_alias.lst
- Pipeline/gate/plugins/ANNIE/resources/othomatcher/alias.lst
- Pipeline/gate/plugins/ANNIE/resources/othomatcher/prepos.lst
- Pipeline/gate/plugins/ANNIE/resources/schema/
- Pipeline/gate/plugins/ANNIE/resources/schema/DateSchema.xml
- Pipeline/gate/plugins/ANNIE/resources/schema/IdentifierSchema.xml
- Pipeline/gate/plugins/ANNIE/resources/schema/PercentSchema.xml
- Pipeline/gate/plugins/ANNIE/resources/schema/PhoneSchema.xml
- Pipeline/gate/plugins/ANNIE/resources/schema/PersonSchema.xml
- Pipeline/gate/plugins/ANNIE/resources/schema/MoneySchema.xml
- Pipeline/gate/plugins/ANNIE/resources/schema/OrganizationSchema.xml
- Pipeline/gate/plugins/ANNIE/resources/schema/AddressSchema.xml
- Pipeline/gate/plugins/ANNIE/resources/schema/ANNIE-Schemas.xml
- Pipeline/gate/plugins/ANNIE/resources/schema/SentenceSchema.xml
- Pipeline/gate/plugins/ANNIE/resources/schema/LocationSchema.xml
- Pipeline/gate/plugins/ANNIE/resources/sentenceSplitter/
- Pipeline/gate/plugins/ANNIE/resources/sentenceSplitter/grammar/
- Pipeline/gate/plugins/ANNIE/resources/sentenceSplitter/grammar/prepare.jape
- Pipeline/gate/plugins/ANNIE/resources/sentenceSplitter/grammar/main.jape
- Pipeline/gate/plugins/ANNIE/resources/sentenceSplitter/grammar/split.jape
- Pipeline/gate/plugins/ANNIE/resources/sentenceSplitter/grammar/find.jape
- Pipeline/gate/plugins/ANNIE/resources/sentenceSplitter/grammar/main-single-nl.jape
- Pipeline/gate/plugins/ANNIE/resources/sentenceSplitter/grammar/cleanup.jape
- Pipeline/gate/plugins/ANNIE/resources/sentenceSplitter/grammar/no-splits.jape
- Pipeline/gate/plugins/ANNIE/resources/sentenceSplitter/grammar/find-single-nl.jape
- Pipeline/gate/plugins/ANNIE/resources/sentenceSplitter/gazetteer/
- Pipeline/gate/plugins/ANNIE/resources/sentenceSplitter/gazetteer/lists.def
- Pipeline/gate/plugins/ANNIE/resources/sentenceSplitter/gazetteer/abbreviations.lst
- Pipeline/gate/plugins/ANNIE/resources/heptag/
- Pipeline/gate/plugins/ANNIE/resources/heptag/lexicon_cap
- Pipeline/gate/plugins/ANNIE/resources/heptag/lexicon_lower
- Pipeline/gate/plugins/ANNIE/resources/heptag/old_lexicon
- Pipeline/gate/plugins/ANNIE/resources/heptag/ruleset
- Pipeline/gate/plugins/ANNIE/resources/heptag/lexicon_all
- Pipeline/gate/plugins/ANNIE/resources/heptag/lexicon
- Pipeline/gate/plugins/ANNIE/resources/heptag/rules_cap
- Pipeline/gate/plugins/ANNIE/resources/gazetteer/
- Pipeline/gate/plugins/ANNIE/resources/gazetteer/mlb-teams.lst
- Pipeline/gate/plugins/ANNIE/resources/gazetteer/person_female_lower_ambig.lst
- Pipeline/gate/plugins/ANNIE/resources/gazetteer/person_male_lower_ambig.lst
- Pipeline/gate/plugins/ANNIE/resources/gazetteer/title_pol.lst
- Pipeline/gate/plugins/ANNIE/resources/gazetteer/person_male_ambig.lst
- Pipeline/gate/plugins/ANNIE/resources/gazetteer/companies_uk.lst
- Pipeline/gate/plugins/ANNIE/resources/gazetteer/cabinet_ministers.lst
- Pipeline/gate/plugins/ANNIE/resources/gazetteer/lists.def
- Pipeline/gate/plugins/ANNIE/resources/gazetteer/day.lst
- Pipeline/gate/plugins/ANNIE/resources/gazetteer/religious_adj.lst
- Pipeline/gate/plugins/ANNIE/resources/gazetteer/date_key.lst
- Pipeline/gate/plugins/ANNIE/resources/gazetteer/stop.lst
- Pipeline/gate/plugins/ANNIE/resources/gazetteer/person_female.lst
- Pipeline/gate/plugins/ANNIE/resources/gazetteer/mountain.lst
- Pipeline/gate/plugins/ANNIE/resources/gazetteer/hour.lst
- Pipeline/gate/plugins/ANNIE/resources/gazetteer/province_ab.lst
- Pipeline/gate/plugins/ANNIE/resources/gazetteer/country_abbrev.lst
- Pipeline/gate/plugins/ANNIE/resources/gazetteer/nba-teams.lst
- Pipeline/gate/plugins/ANNIE/resources/gazetteer/org_ending.lst
- Pipeline/gate/plugins/ANNIE/resources/gazetteer/title.lst
- Pipeline/gate/plugins/ANNIE/resources/gazetteer/person_female_lower.lst
- Pipeline/gate/plugins/ANNIE/resources/gazetteer/organization.lst
- Pipeline/gate/plugins/ANNIE/resources/gazetteer/ministry.lst
- Pipeline/gate/plugins/ANNIE/resources/gazetteer/department.lst
- Pipeline/gate/plugins/ANNIE/resources/gazetteer/street.lst
- Pipeline/gate/plugins/ANNIE/resources/gazetteer/nonspec_date.lst
- Pipeline/gate/plugins/ANNIE/resources/gazetteer/time_ampm.lst
- Pipeline/gate/plugins/ANNIE/resources/gazetteer/person_ambig.lst
- Pipeline/gate/plugins/ANNIE/resources/gazetteer/company_ambig.lst
- Pipeline/gate/plugins/ANNIE/resources/gazetteer/numbers.lst
- Pipeline/gate/plugins/ANNIE/resources/gazetteer/jobtitles.lst
- Pipeline/gate/plugins/ANNIE/resources/gazetteer/person_male_lower.lst
- Pipeline/gate/plugins/ANNIE/resources/gazetteer/government_base.lst
- Pipeline/gate/plugins/ANNIE/resources/gazetteer/water.lst
- Pipeline/gate/plugins/ANNIE/resources/gazetteer/government/
- Pipeline/gate/plugins/ANNIE/resources/gazetteer/government/govt-departments-ministerial.lst
- Pipeline/gate/plugins/ANNIE/resources/gazetteer/government/lists.def
- Pipeline/gate/plugins/ANNIE/resources/gazetteer/government/title-army.lst
- Pipeline/gate/plugins/ANNIE/resources/gazetteer/government/govt-departments-non-ministerial-abbreviations.lst
- Pipeline/gate/plugins/ANNIE/resources/gazetteer/government/non-cabinet-minister-posts.lst
- Pipeline/gate/plugins/ANNIE/resources/gazetteer/government/title-airforce.lst
- Pipeline/gate/plugins/ANNIE/resources/gazetteer/government/public-bodies-non-departmental.lst
- Pipeline/gate/plugins/ANNIE/resources/gazetteer/government/wars.lst
- Pipeline/gate/plugins/ANNIE/resources/gazetteer/government/war_key.lst
- Pipeline/gate/plugins/ANNIE/resources/gazetteer/government/title-medical.lst
- Pipeline/gate/plugins/ANNIE/resources/gazetteer/government/constituencies-scotland.lst
- Pipeline/gate/plugins/ANNIE/resources/gazetteer/government/govt-departments-non-ministerial.lst
- Pipeline/gate/plugins/ANNIE/resources/gazetteer/government/report-ending.lst
- Pipeline/gate/plugins/ANNIE/resources/gazetteer/government/titles-other.lst
- Pipeline/gate/plugins/ANNIE/resources/gazetteer/government/military-operations-abbrev.lst
- Pipeline/gate/plugins/ANNIE/resources/gazetteer/government/org-military.lst
- Pipeline/gate/plugins/ANNIE/resources/gazetteer/government/cabinet-ministers.lst
- Pipeline/gate/plugins/ANNIE/resources/gazetteer/government/document-pre.lst
- Pipeline/gate/plugins/ANNIE/resources/gazetteer/government/title-navy.lst
- Pipeline/gate/plugins/ANNIE/resources/gazetteer/government/org-law.lst
- Pipeline/gate/plugins/ANNIE/resources/gazetteer/government/constituencies-n.ireland.lst
- Pipeline/gate/plugins/ANNIE/resources/gazetteer/government/military-operations.lst
- Pipeline/gate/plugins/ANNIE/resources/gazetteer/government/executive-agencies.lst
- Pipeline/gate/plugins/ANNIE/resources/gazetteer/government/govt-departments-ministerial-abbreviations.lst
- Pipeline/gate/plugins/ANNIE/resources/gazetteer/government/project_keyword.lst
- Pipeline/gate/plugins/ANNIE/resources/gazetteer/government/constituencies-wales.lst
- Pipeline/gate/plugins/ANNIE/resources/gazetteer/government/constituencies-england.lst
- Pipeline/gate/plugins/ANNIE/resources/gazetteer/government/constituencies.lst
- Pipeline/gate/plugins/ANNIE/resources/gazetteer/government/non-cabinet-ministers.lst
- Pipeline/gate/plugins/ANNIE/resources/gazetteer/government/govt-departments-non-ministerial-old.lst
- Pipeline/gate/plugins/ANNIE/resources/gazetteer/government/executive-agencies-old.lst
- Pipeline/gate/plugins/ANNIE/resources/gazetteer/government/legislation-pre.lst
- Pipeline/gate/plugins/ANNIE/resources/gazetteer/government/document_ending_other.lst
- Pipeline/gate/plugins/ANNIE/resources/gazetteer/government/list-case-sensitive.def
- Pipeline/gate/plugins/ANNIE/resources/gazetteer/government/org-other.lst
- Pipeline/gate/plugins/ANNIE/resources/gazetteer/government/laws.lst
- Pipeline/gate/plugins/ANNIE/resources/gazetteer/government/ministers-attending-cabinet.lst
- Pipeline/gate/plugins/ANNIE/resources/gazetteer/government/org-political.lst
- Pipeline/gate/plugins/ANNIE/resources/gazetteer/government/executive-agencies-abbreviations.lst
- Pipeline/gate/plugins/ANNIE/resources/gazetteer/government/legislation-ending.lst
- Pipeline/gate/plugins/ANNIE/resources/gazetteer/government/project.lst
- Pipeline/gate/plugins/ANNIE/resources/gazetteer/government/govt-responsibility-categories.lst
- Pipeline/gate/plugins/ANNIE/resources/gazetteer/government/cabinet-positions.lst
- Pipeline/gate/plugins/ANNIE/resources/gazetteer/person_spur.lst
- Pipeline/gate/plugins/ANNIE/resources/gazetteer/other_people.lst
- Pipeline/gate/plugins/ANNIE/resources/gazetteer/org_key_cap.lst
- Pipeline/gate/plugins/ANNIE/resources/gazetteer/country.lst
- Pipeline/gate/plugins/ANNIE/resources/gazetteer/festival.lst
- Pipeline/gate/plugins/ANNIE/resources/gazetteer/othorg_key.lst
- Pipeline/gate/plugins/ANNIE/resources/gazetteer/bands.lst
- Pipeline/gate/plugins/ANNIE/resources/gazetteer/person_female_cap.lst
- Pipeline/gate/plugins/ANNIE/resources/gazetteer/phone_prefix.lst
- Pipeline/gate/plugins/ANNIE/resources/gazetteer/date_post.lst
- Pipeline/gate/plugins/ANNIE/resources/gazetteer/person_ambig_lower.lst
- Pipeline/gate/plugins/ANNIE/resources/gazetteer/music-artists.lst
- Pipeline/gate/plugins/ANNIE/resources/gazetteer/org_base.lst
- Pipeline/gate/plugins/ANNIE/resources/gazetteer/org_key.lst
- Pipeline/gate/plugins/ANNIE/resources/gazetteer/months_lower.lst
- Pipeline/gate/plugins/ANNIE/resources/gazetteer/months.lst
- Pipeline/gate/plugins/ANNIE/resources/gazetteer/govern_key.lst
- Pipeline/gate/plugins/ANNIE/resources/gazetteer/city_uk.lst
- Pipeline/gate/plugins/ANNIE/resources/gazetteer/companies_uk_lower.lst
- Pipeline/gate/plugins/ANNIE/resources/gazetteer/person_relig.lst
- Pipeline/gate/plugins/ANNIE/resources/gazetteer/ordinal.lst
- Pipeline/gate/plugins/ANNIE/resources/gazetteer/newspapers.lst
- Pipeline/gate/plugins/ANNIE/resources/gazetteer/year.lst
- Pipeline/gate/plugins/ANNIE/resources/gazetteer/city_cap.lst
- Pipeline/gate/plugins/ANNIE/resources/gazetteer/facility.lst
- Pipeline/gate/plugins/ANNIE/resources/gazetteer/person_female_ambig.lst
- Pipeline/gate/plugins/ANNIE/resources/gazetteer/title_mil.lst
- Pipeline/gate/plugins/ANNIE/resources/gazetteer/loc_other.lst
- Pipeline/gate/plugins/ANNIE/resources/gazetteer/person_male.lst
- Pipeline/gate/plugins/ANNIE/resources/gazetteer/title_male.lst
- Pipeline/gate/plugins/ANNIE/resources/gazetteer/say.lst
- Pipeline/gate/plugins/ANNIE/resources/gazetteer/determiner.lst
- Pipeline/gate/plugins/ANNIE/resources/gazetteer/city_uk_ambig.lst
- Pipeline/gate/plugins/ANNIE/resources/gazetteer/province_aa.lst
- Pipeline/gate/plugins/ANNIE/resources/gazetteer/adbc.lst
- Pipeline/gate/plugins/ANNIE/resources/gazetteer/title_lowercase.lst
- Pipeline/gate/plugins/ANNIE/resources/gazetteer/url_key.lst
- Pipeline/gate/plugins/ANNIE/resources/gazetteer/currency_unit.lst
- Pipeline/gate/plugins/ANNIE/resources/gazetteer/country_code.lst
- Pipeline/gate/plugins/ANNIE/resources/gazetteer/ident_prekey.lst
- Pipeline/gate/plugins/ANNIE/resources/gazetteer/more_company.lst
- Pipeline/gate/plugins/ANNIE/resources/gazetteer/nfl-teams.lst
- Pipeline/gate/plugins/ANNIE/resources/gazetteer/person_ambig2.lst
- Pipeline/gate/plugins/ANNIE/resources/gazetteer/airport.lst
- Pipeline/gate/plugins/ANNIE/resources/gazetteer/person_male_cap.lst
- Pipeline/gate/plugins/ANNIE/resources/gazetteer/date_other.lst
- Pipeline/gate/plugins/ANNIE/resources/gazetteer/surname_prefix.lst
- Pipeline/gate/plugins/ANNIE/resources/gazetteer/airports.lst
- Pipeline/gate/plugins/ANNIE/resources/gazetteer/newspaper_ending.lst
- Pipeline/gate/plugins/ANNIE/resources/gazetteer/radio_stations_uk.lst
- Pipeline/gate/plugins/ANNIE/resources/gazetteer/state_us_ambig.lst
- Pipeline/gate/plugins/ANNIE/resources/gazetteer/country_cap.lst
- Pipeline/gate/plugins/ANNIE/resources/gazetteer/loc_key.lst
- Pipeline/gate/plugins/ANNIE/resources/gazetteer/time_modifier.lst
- Pipeline/gate/plugins/ANNIE/resources/gazetteer/cdg.lst
- Pipeline/gate/plugins/ANNIE/resources/gazetteer/racecourse.lst
- Pipeline/gate/plugins/ANNIE/resources/gazetteer/loc_prekey.lst
- Pipeline/gate/plugins/ANNIE/resources/gazetteer/person_first.lst
- Pipeline/gate/plugins/ANNIE/resources/gazetteer/person_female_ambig_cap.lst
- Pipeline/gate/plugins/ANNIE/resources/gazetteer/org_pre.lst
- Pipeline/gate/plugins/ANNIE/resources/gazetteer/person_ending.lst
- Pipeline/gate/plugins/ANNIE/resources/gazetteer/title_lower.lst
- Pipeline/gate/plugins/ANNIE/resources/gazetteer/timeofday.lst
- Pipeline/gate/plugins/ANNIE/resources/gazetteer/loc_relig.lst
- Pipeline/gate/plugins/ANNIE/resources/gazetteer/day_cap.lst
- Pipeline/gate/plugins/ANNIE/resources/gazetteer/greeting.lst
- Pipeline/gate/plugins/ANNIE/resources/gazetteer/time_unit.lst
- Pipeline/gate/plugins/ANNIE/resources/gazetteer/currency_prefix.lst
- Pipeline/gate/plugins/ANNIE/resources/gazetteer/non_company.lst
- Pipeline/gate/plugins/ANNIE/resources/gazetteer/state_us.lst
- Pipeline/gate/plugins/ANNIE/resources/gazetteer/date_unit.lst
- Pipeline/gate/plugins/ANNIE/resources/gazetteer/person_sci.lst
- Pipeline/gate/plugins/ANNIE/resources/gazetteer/post.lst
- Pipeline/gate/plugins/ANNIE/resources/gazetteer/city_lower.lst
- Pipeline/gate/plugins/ANNIE/resources/gazetteer/spur.lst
- Pipeline/gate/plugins/ANNIE/resources/gazetteer/region_cap.lst
- Pipeline/gate/plugins/ANNIE/resources/gazetteer/date.lst
- Pipeline/gate/plugins/ANNIE/resources/gazetteer/tvcompany.lst
- Pipeline/gate/plugins/ANNIE/resources/gazetteer/government.lst
- Pipeline/gate/plugins/ANNIE/resources/gazetteer/company_cap.lst
- Pipeline/gate/plugins/ANNIE/resources/gazetteer/charities.lst
- Pipeline/gate/plugins/ANNIE/resources/gazetteer/foreign_ministers.lst
- Pipeline/gate/plugins/ANNIE/resources/gazetteer/time_key.lst
- Pipeline/gate/plugins/ANNIE/resources/gazetteer/city.lst
- Pipeline/gate/plugins/ANNIE/resources/gazetteer/timezone.lst
- Pipeline/gate/plugins/ANNIE/resources/gazetteer/number_fold.lst
- Pipeline/gate/plugins/ANNIE/resources/gazetteer/abbreviations.lst
- Pipeline/gate/plugins/ANNIE/resources/gazetteer/facility_key_ext.lst
- Pipeline/gate/plugins/ANNIE/resources/gazetteer/colours.lst
- Pipeline/gate/plugins/ANNIE/resources/gazetteer/planet.lst
- Pipeline/gate/plugins/ANNIE/resources/gazetteer/mapping.def
- Pipeline/gate/plugins/ANNIE/resources/gazetteer/sports.lst
- Pipeline/gate/plugins/ANNIE/resources/gazetteer/person_celebrity_surname.lst
- Pipeline/gate/plugins/ANNIE/resources/gazetteer/company_lower.lst
- Pipeline/gate/plugins/ANNIE/resources/gazetteer/date_pre.lst
- Pipeline/gate/plugins/ANNIE/resources/gazetteer/datespan.lst
- Pipeline/gate/plugins/ANNIE/resources/gazetteer/org_spur.lst
- Pipeline/gate/plugins/ANNIE/resources/gazetteer/percent.lst
- Pipeline/gate/plugins/ANNIE/resources/gazetteer/loc_prekey_lower.lst
- Pipeline/gate/plugins/ANNIE/resources/gazetteer/country_adj.lst
- Pipeline/gate/plugins/ANNIE/resources/gazetteer/university_uk.lst
- Pipeline/gate/plugins/ANNIE/resources/gazetteer/spur_ident.lst
- Pipeline/gate/plugins/ANNIE/resources/gazetteer/minutes.lst
- Pipeline/gate/plugins/ANNIE/resources/gazetteer/title_female.lst
- Pipeline/gate/plugins/ANNIE/resources/gazetteer/province.lst
- Pipeline/gate/plugins/ANNIE/resources/gazetteer/company.lst
- Pipeline/gate/plugins/ANNIE/resources/gazetteer/time.lst
- Pipeline/gate/plugins/ANNIE/resources/gazetteer/city_abbreviation.lst
- Pipeline/gate/plugins/ANNIE/resources/gazetteer/region_uk.lst
- Pipeline/gate/plugins/ANNIE/resources/gazetteer/loc_generalkey.lst
- Pipeline/gate/plugins/ANNIE/resources/gazetteer/times.lst
- Pipeline/gate/plugins/ANNIE/resources/gazetteer/region.lst
- Pipeline/gate/plugins/ANNIE/resources/gazetteer/person_male_ambig_cap.lst
- Pipeline/gate/plugins/ANNIE/resources/gazetteer/person_full.lst
- Pipeline/gate/plugins/ANNIE/resources/gazetteer/agency.lst
- Pipeline/gate/plugins/ANNIE/resources/gazetteer/new_adj.lst
- Pipeline/gate/plugins/ANNIE/resources/gazetteer/not_org.lst
- Pipeline/gate/plugins/ANNIE/resources/gazetteer/country_lower.lst
- Pipeline/gate/plugins/ANNIE/resources/gazetteer/rivers.lst
- Pipeline/gate/plugins/ANNIE/resources/gazetteer/musical_group.lst
[truncated: 299 more entries]
