# Supplementary material for: ScholarLens: extracting competences from research publications for the automatic generation of semantic user profiles
Source: PeerJ journal article supplement (doi:10.7717/peerj-cs.121), 2017-07-03
Supplement: Pipeline.zip [file Pipeline.zip › Pipeline/gate/application-resources/grammars/creator_competency_relation.jape]

Imports:{
	import gate.relations.RelationSet;
	import gate.relations.Relation;
}

Phase: Creator_Competency_Relation
Input: Creator

Options: control = once debug=true

Rule: creator_competency_relation(
	{Creator}
):mention
-->
{
	try{
        AnnotationSet set = (gate.AnnotationSet) bindings.get("mention");
        Annotation creator = set.iterator().next();
        
        AnnotationSet defaultSet = doc.getAnnotations();
        AnnotationSet competencies = defaultSet.get("DBpediaNE");
        
        RelationSet relationSet = defaultSet.getRelations();
        for(Annotation competency : competencies){
			Relation newRelation = relationSet.addRelation("CompetencyRecord", new int[] {creator.getId(), competency.getId()});
			newRelation.getFeatures().put("type", "http://www.intelleo.eu/ontologies/competences/ns/CompetenceRecord");
        }
    }catch(Exception e){
        e.printStackTrace();
    }
}
