# Supplementary material for: ScholarLens: extracting competences from research publications for the automatic generation of semantic user profiles
Source: PeerJ journal article supplement (doi:10.7717/peerj-cs.121), 2017-07-03
Supplement: Pipeline.zip [file Pipeline.zip › Pipeline/gate/application-resources/grammars/creator_uri.jape]

Imports:{
	import java.net.URLEncoder;
	import java.net.URL;
}

Phase: Creator_URI_generator
Input: Token

Options: control = once debug=true

Rule: creator_uri_generator(
	{Token}
):mention
-->
{
	String creator_name = ctx.getCorpus().getName().trim();
	try{
		FeatureMap features = Factory.newFeatureMap();
		String creator_uri = "http://semanticsoftware.info/lodexporter/creator/" + URLEncoder.encode(creator_name, "UTF-8");
		features.put("URI", creator_uri);
		features.put("creator_name", creator_name);
		outputAS.add(0L, 10L,"Creator",features);
	}catch (Exception e){
		e.printStackTrace();
	}
}
