# Supplementary material for: ScholarLens: extracting competences from research publications for the automatic generation of semantic user profiles
Source: PeerJ journal article supplement (doi:10.7717/peerj-cs.121), 2017-07-03
Supplement: Pipeline.zip [file Pipeline.zip › Pipeline/gate/application-resources/grammars/ignoredContent.jape]

phase: MarkupIgnoredContent
Input: base-name caption disp-formula h1 h2 h3 h4 job meta outsider ref
ref-list table
options: control=all

Rule: ignoredContent
(
	{base-name}
	|{caption}
	|{disp-formula}
	|{h1}
	|{h2}
	|{h3}
	|{h4}
	|{job}
	|{meta}
	|{outsider}
	|{ref}
	|{ref-list}
	|{table}
):ignore
--> :ignore.Ignored = { kind = "PDFX" }
