# Supplementary material for: ScholarLens: extracting competences from research publications for the automatic generation of semantic user profiles
Source: PeerJ journal article supplement (doi:10.7717/peerj-cs.121), 2017-07-03
Supplement: Pipeline.zip [file Pipeline.zip › Pipeline/gate/application-resources/grammars/removedDBpediaNEs.jape]

phase: RemoveFalseDBpediaNEs
Input: DBpediaNE
options: control=all

Rule: removeNE
(
  {DBpediaNE@string =~ "[Ff]igures?", DBpediaNE.URI == "http://dbpedia.org/resource/Action_figure"}
 |{DBpediaNE@string =~ "[Ff]igures?", DBpediaNE.URI == "http://dbpedia.org/resource/Body_image"}
 |{DBpediaNE@string =~ "[Ff]igures?", DBpediaNE.URI == "http://dbpedia.org/resource/Figure_painting"}
 |{DBpediaNE@string =~ "[Ff]ig", DBpediaNE.URI == "http://dbpedia.org/resource/Ficus"}
 |{DBpediaNE@string =~ "[Tt]ab", DBpediaNE.URI == "http://dbpedia.org/resource/Tab_(GUI)"}
 |{DBpediaNE@string == "Table", DBpediaNE.URI == "http://dbpedia.org/resource/Tabula_Peutingeriana"}
 |{DBpediaNE@string == "al", DBpediaNE.URI == "http://dbpedia.org/resource/Aluminium"}
):ignore
--> :ignore.Ignored = { kind = "DBpediaNE" }
