# Supplementary material for: ScholarLens: extracting competences from research publications for the automatic generation of semantic user profiles
Source: PeerJ journal article supplement (doi:10.7717/peerj-cs.121), 2017-07-03
Supplement: Pipeline.zip [file Pipeline.zip › Pipeline/gate/plugins/ANNIE/build.xml]

<?xml version="1.0"?>
<!-- $Id: build.xml 16174 2012-10-29 13:58:16Z ian_roberts $ -->
<project name="GATE Tokenisers" default="jar" basedir=".">
    <description>
        GATE see http://gate.ac.uk
    </description>
  <!-- set global properties for this build -->
  <!-- Prevent Ant from warning about includeantruntime not being set -->
  <property name="build.sysclasspath" value="ignore" />

  <!-- Name of the output jar file -->
  <property name="jarFile"  location="heptag_wrapper.jar"/>
  
  <!-- Sources -->
  <property name="srcDir" location="src"/>
  
  <!-- Output directory for the build process -->
  <property name="outputDir"  location="classes"/>

  <!-- Libraries directory for the build process -->
  <property name="libDir"  location="lib"/>
  
  <!-- Extensions directory for the build process -->
  <property name="extDir"  location="lib/ext"/>

  <!-- Documentation directory -->
  <property name="docDir"  location="doc"/>
  
  <!-- Use the new 1.3+ compiler -->
  <property name="build.compiler"  value="modern"/>

  
  <!-- tools.jar path -->
  <path id="tools.jar.path" location="../bin/tools14.jar"/>
  
  <!-- The build CLASSPATH -->
  <path id="build.class.path">
    <fileset file="../../bin/gate.jar"/>
    <fileset file="lib/heptag.jar"/>
  </path>
  
  <!-- Prints out some information messages -->
  <echo level="info">
    This is the ANT build script for a CREOLE GATE component (http://gate.ac.uk).
    Type &quot;ant help&quot; for details about the targets available.
    GATE ${gate.version}, build ${gate.build}</echo>
    
  <!-- Prints out details about the targets -->
  <target name="help">
    <echo level="info">
      This is the ANT build script for gate (http://gate.ac.uk).
      The following targets are available
        -all (default target): compiles GUK and GATE classes and makes the gate.jar archive.
        
        -compile: compiles all the .java files
        -resources: copies the resources to the output directory (${outputDir})
        -jar: creates the gate.jar archive
        -run: starts GATE
        -clean: cleans up the output from all previous builds
        
        -doc: creates the Javadoc and Java2HTML documentation
        -docclean: deletes all built documentation
        -jape: rebuilds the JAPE parser files and associated documentation
        -guk: compiles the GUK classes and builds the guk.jar archive
        -gukdemo: starts the GUK Editor (a.k.a. GATE Unicode Editor)
        -test: runs the GATE test suite
        
        -distro: make a GATE distribution (calls all build tasks in the process)
    </echo>
  </target>
  

	<!-- This target compiles all the classes -->  
  <target name="compile"
          description="compile the source " >
    <!-- Compile the java code from ${srcDir} into ${buildDir} -->
    <javac srcdir="${srcDir}" 
		       destdir="${outputDir}"
           includes="gate/**"
           source="1.4"
           target="1.4"
					 classpathref="build.class.path"/>
  </target>
	
  <!-- Make gate.jar archive -->
	<target name="jar" depends="compile">
		<jar destfile="${jarFile}" 
         update="false"
         index="true">
      <fileset dir="${outputDir}/"
               includes="gate/**"/>
    </jar>
	</target>
  
  
  <!-- Clear all build output -->
  <target name="clean">
    <delete includeemptydirs="true">
      <fileset dir="${outputDir}" excludes="**/CVS,**/CVS/**,**/.cvsignore"/>
    </delete>
  </target>
  
  <!-- Dummy javadoc as there are no sources but gate core wants the target -->
  <target name="javadoc">
  </target>
  
  <!-- Make documentation - internal -->
  <target name="internaljavadoc">
    <javadoc access="private" 
              destdir="${docDir}/javadoc/internal"
              classpathref="run.class.path"
              Extdirs="${extDir}"
              Encoding="UTF-8"
              Use="yes"
              Windowtitle="GATE JavaDoc"
              link="http://docs.oracle.com/javase/6/docs/api/"
              docencoding="UTF-8"
              charset="UTF-8"
              source="1.6"
              breakiterator="true">
      <fileset dir="${srcDir}"/>        
    </javadoc>
  </target>

  
  <!-- Convert the source to HTML using the java2html utility -->
  <target name="java2html">
    <java jar="${buildDir}/lib/j2h.jar"
          fork="true"
          spawn="false">
      <jvmarg value="-Dfile.encoding=UTF-8"/>
      <arg value="-d"/> <arg file="${docDir}/java2html/"/>
      <arg value="-js"/> <arg file="${srcDir}"/>
      <arg value="-jd"/> <arg file="${docDir}/javadoc"/>
      <arg value="-m"/> <arg value="4"/>
      <arg value="-t"/> <arg value="2"/>
      <arg value="-n"/> <arg value="&quot;GATE source&quot;"/>
    </java>
  </target>
 
  <target name="doc" depends="javadoc, internaljavadoc, java2html"/>
 
  
  <!-- Clear all built documentation -->
  <target name="docclean">
    <delete includeemptydirs="true">
      <fileset dir="${docDir}/javadoc" excludes="**/CVS,**/CVS/**,**/.cvsignore,internal,internal/**"/>
    </delete>
    <delete includeemptydirs="true">
      <fileset dir="${docDir}/javadoc/internal" excludes="**/CVS,**/CVS/**,**/.cvsignore"/>
    </delete>
    <delete includeemptydirs="true">
      <fileset dir="${docDir}/java2html" excludes="**/CVS,**/CVS/**,**/.cvsignore"/>
    </delete>
  </target>
    
  <target name="test" depends="jar">
    <junit fork="true" 
           showoutput="yes"
           printsummary="yes">
      <classpath refid="run.class.path"/>
      <sysproperty key="gate.config" value="${buildDir}/gate.xml"/>
      <jvmarg value="-Djava.ext.dirs=${extDir}"/>
      <formatter type="plain"
                 usefile="false"/>
      <formatter type="xml"
                 if="write.xml"/>
      <test name="gate.TestGate"
            outfile="testResult"
            todir="${buildDir}"/>
    </junit>
  </target>  
</project>
