# Supplementary material for: ScholarLens: extracting competences from research publications for the automatic generation of semantic user profiles
Source: PeerJ journal article supplement (doi:10.7717/peerj-cs.121), 2017-07-03
Supplement: Pipeline.zip [file Pipeline.zip › Pipeline/gate/plugins/ANNIE/resources/gazetteer/bands.lst]

The Beatles
Pink Floyd
AC/DC
The Rolling Stones
ABBA
Eagles
U2
Aerosmith
Genesis	
Bee Gees
Dire Straits
Eminem
Metallica
Fleetwood Mac
Backstreet Boys
Guns N' Roses
The Carpenters
Def Leppard
The Beach Boys
Kiss
The Who
B'z
Santana
R.E.M.
Red Hot Chili Peppers
New Kids on the Block
The Black Eyed Peas
Green Day
Nirvana
Spice Girls
Mötley Crüe
Depeche Mode
Bad Boys Inc
BBMak
Billiam
Blake
Brother Beyond
The Dallas Boys
Duran Duran
East 17
Flintlock
Freefaller
G4
Herman's Hermits
JLS
Let Loose
Loveable Rogues
M.A.D.
McBusted
McFly
The Mend
MN8
Musical Youth
My Forever
The Noise Next Door
North & South
One Direction
One True Voice
The Overtones
Phixx
PJ & Duncan
The Reason 4
ReConnected
Robson & Jerome
Son of Dork
Blazin' Squad
Take That
Triple 8
Ultimate Kaos
Union J
US5
Worlds Apart
