# Supplementary material for: ScholarLens: extracting competences from research publications for the automatic generation of semantic user profiles
Source: PeerJ journal article supplement (doi:10.7717/peerj-cs.121), 2017-07-03
Supplement: Pipeline.zip [file Pipeline.zip › Pipeline/gate/plugins/ANNIE/resources/gazetteer/cabinet_ministers.lst]

David Cameron:gender=male
Nick Clegg:gender=male
William Hague:gender=male
George Osborne:gender=male
Kenneth Clarke:gender=male
Theresa May:gender=female
Liam Fox:gender=male
Vincent Cable:gender=male
Iain Duncan Smith:gender=male
Chris Hulme:gender=male
Andrew Lansley:gender=male
Michael Gove:gender=male
Eric Pickles:gender=male
Philip Hammond:gender=male
Caroline Spelman:gender=female
Andrew Mitchell:gender=male
Jeremy Hunt:gender=male
Owen Paterson:gender=male
Michael Moore:gender=male
Cheryl Gillan:gender=female
Danny Alexander:gender=male
Baroness Warsi:gender=female
Lord Strathclyde:gender=male
