# Supplementary material for: ScholarLens: extracting competences from research publications for the automatic generation of semantic user profiles
Source: PeerJ journal article supplement (doi:10.7717/peerj-cs.121), 2017-07-03
Supplement: Pipeline.zip [file Pipeline.zip › Pipeline/gate/plugins/ANNIE/resources/gazetteer/city_cap.lst]

AACCRA
AALBORG
AARHUS
ABABA
ABADAN
ABAKAN
ABERDEEN
ABHA
ABI DHABI
ABIDJAN
ABILENE
ABU
ABU DHABI
ABUJA
ACAPULCO
ACARIGUA
ACCRA
ADAK ISLAND
ADANA
ADDIS
ADDIS ABABA
ADDLESTONE
ADELAIDE
ADEN
ADLER
ADNAN MENDERES
AGADIR
AGUASCALIENTES
AHMEDABAD
AIRES
AIX-EN-PROVENCE
AIX-LES-BAINS
AJACCIO
AJIJIC
AKIACHAK
AKIAK
AKITA
AKRON
AL BASRAH
AL ISKANDARIYH
AL MUTHANA
AL-BAHA
AL-FUJAIRAH
ALBANY
ALBERT BAY
ALBERTVILLE
ALBUQUERQUE
ALEANDRIA
ALEANDROUPOLIS
ALENCON
ALEPPO
ALES
ALEXANDRIE
ALGER
ALGESIRAS
ALGIERS
ALICANTE
ALLAHABAD
ALLAKAKET
ALLENTOWN
ALMA ATA
ALMA-ATA
ALMATYAMIENS
ALOFI
ALOR SETAR
ALTONA
ALTOONA
AMARILLO
AMCHITKA
AMMAN
AMRITSAR
AMSTERDAM
ANCHORAGE
ANCONA
ANDAHUAYLAS
ANDORRA
ANFA
ANGELES
ANGERS
ANGOULEME
ANGUILLA
ANIAK
ANKANG
ANKARA
ANNABA
ANNAPOLIS
ANNECY
ANTALYA
ANTANANARIVO
ANTANNANARIVO
ANTIGUA
ANTIGUA-ET-ANVERS
ANTOFAGASTA
ANTWERP
ANTWERPEN
ANVIK
AOMORI
APIA
APPLETON
APRA HARBOR
AQABA
ARCACHON
ARCATA
ARCTIC VILLAGE
ARECIBO
AREQUIPA
ARGENTIA
ARICA
ARKHANGELSK
ARLANDA
ARUBA
ARZANAH ISLAND
AS SUWAYS
ASAHIKAWA
ASCENSION
ASHEVILLE
ASHKHABAD
ASMARA
ASTRURIAS
ASUNCION
ASUNCIóN
ASWAN
ATHENES
ATHENS
ATLANTA
ATLANTIC CITY
ATMAUTLUAK
AUBERVILLERS
AUCKLAND
AUGUSTA
AURORA
AUSTIN
AUTEUIL
AUTRANS
AUVILLAR
AVARUA
AVIGNON
AVIV
AVORIAZ
AYACUCHO
BAGHDAD
BAHRAIN
BAHREIN
BAKERSFIELD
BAKU
BALBOA
BALMACEDA
BALTIMORE
BAMAKO
BANDAR
BANDAR ABBAS
BANDAR SERI BEGAWAN
BANDAR SHAHID REJAIE
BANEASA
BANGALORE
BANGKOK
BANGOR
BANGUI
BANJUL
BANZART
BAOTOU
BARBADOS
BARCELONA
BARCELONE
BARDUFOSS
BARENTSBURG
BARI
BARINAS
BARLETTA
BARNES
BARQUISIMETO
BARRANQUILLA
BARROW
BARROW-IN-FURNESS
BASLE
BASRA
BASSE-TERRE
BASSETERRE
BASTIA
BASUO GANG
BATON ROUGE
BATTLE CREEK
BAY CITY
BAYONNE
BAYONNNE
BEAUMONT
BEAUVAIS
BEAVER
BEAVER RUIN
BEGAWAN
BEIJING
BEIRA
BEIRUT
BEL-AIR
BELEM
BELFAST
BELFAST CITY
BELFORT
BELGRADE
BELIZE
BELLINGHAM
BELMOPAN
BELO HORIZONTE
BENGHAZI
BERGEN
BERGERAC
BERKELEY
BERLIN
BERMUDA
BERN
BERNE
BESANCON
BETHEL
BETHLEHEM
BETTELS
BETTLES
BEVERLY HILLS
BEYROUTH
BIAK
BIARRITZ
BILBAO
BILLINGS
BILLUND
BILOXI
BINGHAMTON
BINTULU
BIRMINGHAM
BISMARCK
BISSAU
BITCHE
BLAGNAC
BLANDING
BLANTYRE
BLANTYRE-LIMBE
BLOEMFONTEIN
BLOISBOGOTA
BLOOMINGTON
BLYTH
BOA VISTA
BODO
BOGOTA
BOGOTá
BOISE
BOLOGNA
BOLOGNE
BOMBAY
BONAIRE
BONN
BORDEAUX
BORISPOL
BOSTON
BOULDER
BOULOGNE
BOURNEMOUTH
BOZEMAN
BRADENTON
BRADFORD
BRAINERD
BRAKE
BRASILIA
BRATISLAVA
BRAZZAVILLE
BREMEN
BREMERHAVEN
BREMERTON
BREST
BRIDGEND
BRIDGEPORT
BRIDGETOWN
BRINDISI
BRISBANE
BRISTOL
BRIZE NORTON
BROMMA
BROMSGROVE
BROOKLYN
BROWNSVILLE
BRUGGE
BRUNSWICK
BRUSSELS
BRUXELLES
BRUZ
BUAREST
BUCARAMANGA
BUCAREST
BUCHAREST
BUCKNALL
BUDAPEST
BUENOS
BUENOS AIRES
BUFFALO
BUJUMBURA
BULAWAYO
BUR SAID
BUR SUDAN
BURBANK
BURKE LAKEFRONT
BURKINA-CAEN
BURLINGTON
BURNSALL
BURTON-ON-TRENT
BURY ST EDMUNDS
BUSAN
BUSHEHR
BUTTE
CADIZ
CAIRE
CAIRNS
CAIRO
CAJAMARCA
CALAIS
CALAMA
CALCUTTA
CALGARY
CALI
CALICUT
CALIKYITSIK
CALUMET
CALUMET HARBOR
CALVI
CAMBRIDGE
CAMBRIDGE BAY
CAMDEN
CAMEMBERT
CAMP DAVID
CAMPANA
CAMPO GRANDE
CANAIMA
CANAPORT
CANBERRA
CANCUN
CANET
CANNES
CANTON
CAPE GIRARDEAU
CAPE TOWN
CAPE YAKATAGE
CARACAS
CARDIF
CARDIFF
CARLISLE
CARLSBAD
CARNAC
CARSON CITY
CARTAGENA
CARTAGENE
CARTHAGE
CARUPANO
CASABLANCA
CASPER
CASTRIES
CATANIA
CAYENNE
CEBU
CEDAR CITY
CEDAR RAPIDS
CERGY
CEUTA
CHACHAPOYAS
CHAIANG MAI
CHALONS-SUR-SAONE
CHAMBERY
CHAMONIX
CHAMPAIGN
CHAMPIGNY
CHANDIGARH
CHANGCHUN
CHANGSHA
CHANTILLY
CHARLESTON
CHARLESTOWN
CHARLEVILLE-MEZIERES
CHARLOTTE AMALIE
CHARTRES
CHATEAU-THIERRY
CHATHAM DOCKS
CHATTANOOGA
CHAVANOD
CHAVENAY
CHEAM
CHEFORNAK
CHEJU
CHELMSFORD
CHENGDU
CHENNAI
CHERBOURG
CHESTER
CHETUMAL
CHEVAK
CHEYENNE
CHI
CHI LUNG
CHIANG
CHICAGO
CHICHEN ITZA
CHICLAYO
CHICO
CHIGNIK
CHIHUAHUA
CHING TAO
CHISWICK
CHITOSE
CHITTAGONG
CHONGQING
CHRISTCHURCH
CHUATHBALUK
CIENFUEGOS
CIGLI MILITARY
CINCINNATI
CITY
CIUDAD DEL CARMEN
CIUDAD DEL CARMEN
CIUDAD DEL ESTE
CIVITAVECCHIA
CLADISVOSTOK
CLAMPINO
CLERMONT-FERRAND
CLEVELAND
CLICHY
COBH
COCHABAMBA
COCHIN
COEUR D'ALENE
COLCHESTER
COLD BAY
COLIMA
COLLEGE STATION
COLMAR
COLOGNE
COLOMBO
COLOMBO HARBOR
COLORADO SPRINGS
COLUMBIA
COLUMBUS
COLUMBUSS
CONAKRY
CONCEPCION
CONCORD
CONGONHAS
CONSTANTINE
COPENHAGE
COPENHAGEN
COPENHAGUE
COPIAPO
CORDOVA
CORINTH
CORK
CORO
CORPUS CHRISTI
COTONOU
COURCHEVEL
COYHAIQUE
COZUMEL
CRACOVIE
CRISTOBAL
CROKKED CREEK
CRUZEIRO DO SUL
CRUZEIRO DO SUL
CUENCA
CUIABA
CUL DE SAC
CUL DE SAC
CULEBRA
CULIACAN
CUMANA
CURACAO
CURITIBA
CUSCO
CUXHAVEN
DALLAS
DAYTON
DENVER
DES MOINES
DETROIT
DAKAR
DALAMAN
DALIAN
DALLAS
DAMAS
DAMASCUS
DAMIETTA
DANBURY
DANVILLE
DAR
DAR ES SALAAM
DAR-ES-SALAAM
DARNETAL
DARWIN
DAVAO
DAYTON
DAYTONA BEACH
DEADHORSE
DEAUVILLE
DECATUR
DEER LAKE
DEERING
DEL RIO
DELHI
DELTA
DELTA JUNCTION
DENPASAR
DENVER
DES MOINES
DESTIN
DETROIT
DHABI
DHAHRAN
DHAKA
DIEPPE
DIJON
DILLINGHAM
DJAKARTA
DJERBA
DJIBOUTI
DOHA
DOMINGUE
DOMODEDOVO
DORDRECHT
DOTHAN
DOUALA
DOVER
DOVER HARBOR
DRESDEN
DUBAI
DUBLIN
DUBROVNIK
DUDINKA
DULUTH
DUNDEE
DUNKERQUE
DURANGO
DURBAN
DURHAM
DURRES
DUSHANBE
DUSSELDORF
DUTCH HARBOR
DüSSELDORF
EAGLE PASS
EALING
EAST LONDON
EAST MIDLANDS
EASTER ISLAND
EDINBURGH
EDISON
EDMONTON
EGEGIK
EINDHOVEN
EKATERINBURG
EL AAIUN
EL FERROL DEL CAUDILLO
EL PASO
EL SALVADOR
EL SEGUNDO
EL VIGIA
ELAT
ELBEUF
ELKO
ELMIRA
ELY
EMBARKADERO
EMDEN
EMIRATS
ENFIELD
ENGLISH BAY
ENSCHEDE
ENSENADA
ERCAN
ERFURT
ERIE
EROS
ESBJERG
ESENBOGA
ESSENDON
EUGENE
EUREKA
EUROPA POINT
EUROPOORT
EVANSVILLE
EVENES
EVIAN
EVREUX
EVRY
EXETER
FAGALL'L
FAIRBANKS
FALKIRK
FALMOUTH
FALSE PASS
FANGCHENG GANG
FARGO
FARO
FAWLEY
FAYETTEVILLE
FECAMP
FELLETIN
FERTE-BERNARD
FEZ
FILLMORE
FINDLAY
FIUMICINO
FLAGSTAFF
FLINT
FLORENCE
FLORES
FONTAINEBLEAU
FORNEBU
FORT DE FRANCE
FORT LAUDERDALE
FORT MYERS
FORT NELSON
FORT PIERCE
FORT SIMPSON
FORT SMITH
FORT ST. JOHN
FORT WALTON BEACH
FORT WAYNE
FORT WORTH
FORT YUKON
FORT DE FRANCE
FORT-DE-FRANCE
FORTALEZA
FRAMINGHAM
FRANCFORT
FRANKFORT
FRANKFURT
FRANKLIN PARK
FRANSISCO
FREDERICTON
FREEPORT
FREETOWN
FREMANTLE
FRESNO
FRIEDRICHSHASEN
FRUNZE
FUKUOKA
FUKUYAMA
FULHAM
FUNAFUTI
FUNCHAL
FUTUNA
FUZHOU
GABORONE
GAINSVILLE
GALENA
GALVESTON
GAMAGORI
GARDERMOEN
GAROUA
GASSIM
GAUHATI
GAYAQUIL
GDANSK
GDYNIA
GEELONG
GEISUM
GEMENA
GENEVA
GENEVE
GENOA
GENOVA
GEORGETOWN
GHARDAIA
GLACIER NATIONAL PARK
GLASGOW
GLENDALE
GOA
GODTHAB
GOLOVIM
GOMA
GOODNEWS
GOODNEWS BAY
GOOSE BAY
GOROKA
GOSLAR
GOTEBORG
GOTHENBURG
GRAN CANARIA
GRAND CAYMAN
GRAND FORKS
GRAND JUNCTION
GRAND RAPIDS
GRAND TURK
GRANDE PRAIRIE
GRANGEMOUTH
GRASSE
GRAYLING
GRAZ
GREAT FALLS
GREEN BAY
GREENOCK
GREENSBORO
GREENVILLE
GRENADA
GRENOBLE
GRIMSBY
GRONINGEN
GROTON
GUADALAJARA
GUAM
GUANGZHOU
GUATEMALA
GUATEMALA CITY
GUAYAQUIL
GUERNSEY
GUILIN
GUINEA-BISSAU
GUIYANG
GULFPORT
GULKANA
GUNNISON
GöTEBORG
HAGEN
HAIKOU
HAIL
HAINES
HAKATA
HAKODATE
HALIM PERDANA KUSUMA
HALL BEACH
HALSINGBORG
HALSTEAD
HAMBOURG
HAMBURG
HAMILTON
HANEDA
HANGZHOU
HANKO
HANLEY
HANOI
HANOI
HANOVER
HANSTHOLM HAVN
HARARE
HARARE
HARBIN
HARBURG
HARLINGEN
HARLOW
HARRISBURG
HARROGATE
HARTFORD
HARTLEPOOL
HASTINGS
HAT YAI
HAUGESUND
HAVANA
HAVANE
HAVRE
HAY RIVER
HAYE
HAYWARD
HEADINGLEY
HEFEI
HEIDELBERG
HELENA
HELSINGBORG
HELSINKI
HERAKLION
HERMOSILLO
HEWANORRA
HIBBING
HIGASHI HARIMA
HILO
HIROSHIMA
HO
HO CHI MINH
HO CHI MINH CITY
HOBART
HOBOKEN
HOHHOT
HOLLYWOOD
HOLY CROSS
HOMER
HONG KONG
HONGHONGKONG
HONIARA
HONOLULU
HOOLEHUA
HOOPER BAY
HOORN
HOSKINS
HOUSTON
HOVE
HUANGPU
HUATULCO
HULL
HUMBERSIDE
HUNTERSTON
HUNTINGTON
HUNTSVILLE
HUSLIA
HVALFJORDUR
HYANNIS
HYDERABAD
HYERES
IDAHO FALLS
IGARKA
IGUASSU FALLS
ILE
ILIAMNA
IMMINGHAM
INCHON
INDIANAPOLIS
INNSBRUCK
INTERCONTINENTAL
INTERNATIONAL FALLS
INUVIK
IOWA CITY
IPOH
IQALUIT
IQUIQUE
IRAKLION
IRON MOUNTAIN
IRVINE
IRVING
ISFAHAN
ISIRO
ISLA GRANDE
ISLAMABAD
ISSY-LES-MOULINEAUX
ISTANBUL
ITAMI
ITHACA
IVANOFF BAY
IWAKUNI
IXTAPA
IZMIR
JACKSON
JACKSON HOLE
JACKSONVILLE
JAIPUR
JAKARTA
JALALABAD
JANEIRO
JANESVILLE
JARNAC
JEDDAH
JEFFERSON CITY
JERICHO
JERSEY
JERSEY CITY
JERUSALEM
JINAN
JOHANNESBURG
JOHN O'GROATS
JOHNSTON ISLAND
JOHOR BAHRU
JONKOPING
JORGE NEWBERY
JOSE
JOUY-EN-JOSAS
JUAN
JUANJUI
JUBA
JUBAIL
JULIACA
JUNEAU
KABUL
KADUNA
KAGOSHIMA
KAHULUI
KAKOGAWA
KAKTOVIK
KALAMAZOO
KALININGRAD
KALISPELL
KALSKAG
KALTAG
KAMPALA
KAMPONG SAOM
KANAB
KANAKANAK
KANANGA
KANO
KANSAS CITY
KAO HSIUNG
KAOHSIUNG
KARACHI
KARACHI HARBOR
KARAGANDA
KARSTO
KARUP
KASIGLUK
KASKO
KATHMANDOU
KATHMANDU
KATUNAN
KAWASAKI
KELANG
KEMAMAN HARBOR
KENAI
KERMAN
KETCHIKAN
KEY WEST
KHABAROVSK
KHARTOUM
KHORRAMSHAHR
KIEL
KIEV
KIGALI
KILBURN
KILIMANJARO
KILLEEN
KIMBERLEY
KIN WAN
KINDU
KING COVE
KING SALMON
KINGSTON
KINGSTON-UPON-THAMES
KINGSTOWN
KINSHASA
KIPNUK
KIRUNA
KISANGANI
KISARAZU
KISHINEV
KIVALINA
KKUUJJUAQ
KLAGENTFURT
KLAIPEDA
KNOXVILLE
KOBE
KOBENHAVN
KOCHI
KODIAK
KOKRUAGAROK
KOLONIA
KOMATSU
KONA
KONGIGANAK
KOROR
KOSOVO
KOSRAE
KOTA KINABALU
KOTKA
KOTZEBUE
KOWEIT
KOYUKUK
KRASNOJARSK
KRISTIANSAND
KRISTINESTAD
KUALA
KUALA LUMPUR
KUANTAN NEW PORT
KUCHING
KUMAMOTO
KUNMING
KUOPIO
KURE
KUSHIKINO
KUSHIRO
KUUJJUARAPIK
KUWAIT
KWAJALIEN
KWANGJU
KWETHLUK
KWIGILLINGOK
KYOTO
LA CEIBA
LA CORUNA
LA CROSSE WI
LA GRANDE
LA HABANA
LA PALLICE
LA PAZ
LA PLATA
LA ROCHELLE
LA SPEZIA
LABUAN
LAE
LAFAYETTE
LAGOS
LAHAD DATU
LAHORE
LAHORELANCON
LAKE CHARLES
LAKE HAVASU CITY
LAKEHEAD HARBOR
LANAI CITY
LANCASTER
LANDS END
LANGKAWI
LANNION
LANSING
LANZHOU
LAREDO
LARNACA
LAS PALMAS
LAS PIEDRAS
LAS VEGAS
LATOUCHE
LAUNCESTON
LAVAL
LAWI LAWI
LAWTON
LAX
LE BOURGET
LE HAVRE
LE PALAIS
LEBANON
LEEDS
LEINSTER
LEIPZIG
LEITH
LENINGRAD
LERWICK
LES SABLES DOLONNE
LETHBRIDGE
LEXINGTON
LHASA
LIBOURNE
LIBREVILLE
LIDO
LIEPAJA
LIHUE
LILLE
LILLELIMA
LILONGWE
LIMA
LIMERICK
LIMOGES
LINATE
LINCOLN
LINZ
LISBOA
LISBON
LISBONNE
LITTLE ROCK
LIVERPOOL
LIVINGSTONE
LIVORNO
LJUBLJANA
LOME
LONDON
LONDON CITY
LONDRES
LONG BEACH
LONGVIEW
LONGYEARBYEN
LORETO
LORIENT
LOS ANGELES
LOS CABOS
LOS MOCHIS
LOUIS
LOUISVILLE
LOURDES
LOUVIERS
LUANDA
LUBBOCK
LUBECK
LUBUMBASHI
LUCKNOW
LUDA
LUENEBURG
LUGANO
LUKA GRUZ
LULEA
LUMPUR
LUNEVILLE
LUSAKA
LUXEMBOURG
LUXOR
LYON
MAASTRICHT
MACCLESFIELD
MACON
MADINAH
MADISON
MADRAS
MADRID
MAGADAN
MAGENTA
MAHE
MAHE ISLAND
MAIDUGURI
MAISONS-LAFFITTE
MAIZURU
MAJURO
MALABO
MALAGA
MALE
MALINDI
MALMO
MALMö
MALPENSA
MALTA
MALVERN
MANADO
MANAGUA
MANAMA
MANAUS
MANCHESTER
MANHATTAN
MANILA
MANILLE
MANS
MANZANILLO
MAPUTO
MARACAIBO
MARGARITA
MARIBOR
MARIGNANE
MARION
MARLOW
MARMORILIK
MARQUETTE
MARRAKECH
MARRIOT ASTRODROME
MARSEILLE
MARSHALL
MARTHA'S VINEYARD
MASCATE
MASERU
MASHAD
MATADI
MATAMOROS
MATSUYAMA
MATURIN
MAURITIUS
MAYAGUEZ
MAZATLAN
MBABANE
MBANDAKA
MBUJI-MAYI
MCALLEN
MCGRATH
MEDAN
MEDELLIN
MEDFORD
MEEKATHARRA
MEKORYUK
MELBOURNE
MELUN
MELVILLE HALL
MEMPHIS
MENDOZA
MERIDA
MERIDEN
MERIDIAN
MESHIK
MESSINA
METZ
MEXICALI
MEXICO
MEXICO CITY
MEYLAN
MIAMI
MILAN
MILFORD
MILTON KEYNES
MILWAUKEE
MINA JABAL ALI
MINATITLAN
MINERALNYE VODY
MINH
MINNEAPOLIS
MINOT
MINSK
MIQUELON
MIRI
MISHIMA KAWANOE
MISSOULA
MIYAZAKI
MIZUSHIMA
MOGADISHU
MOJI
MOLINE
MOLOKAI
MOLYNEUX
MOMBASA
MONACO
MONCTON
MONGSTAD
MONROE
MONROVIA
MONT-DE-MARSAN
MONT-ST-MICHEL
MONTEGO
MONTEGO BAY
MONTERREY
MONTERVIDEO
MONTEVIDEO
MONTGOMERY
MONTICELLO
MONTIGNAC
MONTIGNY
MONTMORILLON
MONTPELIER
MONTPELLIER
MONTREAL
MORELIA
MORESBY
MORONI
MOSCOU
MOSCOW
MOSES POINT
MOSKVA
MOUNT HAGEN
MOUNT PLEASANT
MOUTIERS
MULHOUSE
MUMBAI
MUNICH
MUNSTER
MURMANSK
MURORAN
MUSCAT
MUSCLE SHOALS
MUSKEGON
MYRTLE BEACH
N'DJAMENA
N'DJAMENA
NADI
NAGASAKI
NAGAYEVA
NAGOYA
NAIROBI
NANCHANG
NANCY
NANISIVIK
NANJING
NANNING
NANTES
NANTUCKET
NANYUAN
NAPAKIAK
NAPASKIAK
NAPLES
NAPOLI
NARITA
NASHVILLE
NASSAU
NATAL
NAZARETH
NEMOURS
NEMRUT
NENANA
NEW BEDFORD
NEW BERN
NEW DELHI
NEW HAVEN
NEW ORLEANS
NEW WESTMINSTER
NEW YORK
NEW YORK CITY
NEWARK
NEWBURGH
NEWCASTLE
NEWHALEN
NEWPORT
NEWTOK
NIAGARA FALLS
NIAMEY
NIAMEY
NICOSIA
NICOSIENIMES
NIGHTMUTE
NIIGATA
NIJMEGEN
NIMES
NINGBO
NIORT
NIS
NIZHNEVARTOVSK
NOGALES
NOGENT
NOME
NORFOLK
NORFOLK BEACH
NORILSK
NORMAN WELLS
NORRKOPING
NORTE LOS RODEOS
NORTH PHILADELPHIA
NORWICH
NOTTINGHAM
NOUAKCHOTT
NOUMEA
NOVI SAD
NOVOSIBIRSK
NUEVITAS
NUEVO LAREDO
NUKU'ALOFA
NUKUS
NULATO
NUNAPITCHUK
NUREMBERG
NUUK
OAKLAND
OAXACA
OCKELBO
ODESSA
OITA
OKADAMA
OKAYAMA
OKINAWA
OKLAHOMA CITY
OLD HARBOR
OLDHAM
OLIKTOK
OLYMPIA
OMAHA
ONTARIO
OOSTENDE
ORAN
ORANJESTAD
ORIO AL SERIO
ORLANDO
ORLEANS
OSAKA
OSHKOSH
OSIJEK
OSLO
OSORNO
OSTEND
OTARU
OTOPENI
OTTAWA
OUAGADOUGOU
OVDA
OXNARD
PAGO PAGO
PAITILLA
PALAISEAU
PALEMBANG
PALERMO
PALM SPRINGS
PALMA
PALMER
PALO ALTO
PANAMA
PANAMA CITY
PANGUITCH
PAPEETE
PAPHOS
PARAMARIBO
PAREMPUYRE
PARIS
PARKERSBURG
PARME
PARTHENAY
PASAJES
PASCAGOULA
PASCO
PAU
PAULO
PAYA LEBAR
PAZ
PECOS
PEDRO JUAN CABALLERO
PEKIN
PENANG
PENH
PENSACOLA
PEORIA
PEREIRA
PERIMETER MALL
PERPIGNAN
PERRYVILLE
PERTH
PESCARA
PESHAWAR
PETERSBURG
PETROPAVLOVSK
PHILADELPHIA
PHNOM
PHOENIX
PHUKET
PIERRE
PINANG
PIRAIEVS
PISA
PITTSBURGH
PIURA
PLATA
PLATINUM
PLYMOUTH
POCATELLO
POHNPEI
POINT HOPE
POINT LAY
POINT A PITRE
POINTE-à-PITRE
POITIERS
POLAMAR
PONCE
PONTA DELGADA
PONTIAC
PONTOISE
PORI
PORNIC
PORT ADELAIDE
PORT ARTHUR
PORT AU PRINCE
PORT DALRYMPLE
PORT ELIZABETH
PORT EVERGLADES
PORT GRAHAM
PORT HARCOURT
PORT HEDLAND
PORT HEIDEN
PORT LOUIS
PORT LYTTELTON
PORT MOLLER
PORT MORESBY
PORT OF SPAIN
PORT OF TYNE
PORT VILA
PORT AU PRINCE
PORT OF SPAIN
PORT OF TYNE
PORT-AU-PRINCE
PORT-GRIMAUD
PORT-VILLA
PORT-AU-PRINCE
PORT-OF-SPAIN
PORTLAND
PORTO
PORTO ALEGRE
PORTO DE LEIXOES
PORTO DE SINES
PORTO VELHO
PORTO DE LEIXOES
PORTO DE SINES
PORTO-NOVO
PORTSMOUTH
PORTSMOUTH HARBOR
PRAGUE
PRAIA
PRESQUE ISLE
PRESTWICK
PRETORIA
PRINCE GEORGE
PRINCE RUPERT
PROVIDENCE
PROVIDENCIALES
PRUDHOE BAY
PUCALLPA
PUEBLA
PUERTO
PUERTO ARMUELLES
PUERTO AYACHUCHO
PUERTO DEL CALLAO
PUERTO ESCONDIDO
PUERTO LA CRUZ
PUERTO LA GUAIRA
PUERTO MALDONADO
PUERTO MONTT
PUERTO ORDAZ
PUERTO PLATA
PUERTO VALLARTA
PUNTA ARENAS
PUNTA PALENQUE
PUSAN
PYONGYANG
PYRAMIDEN
QINGDAO
QUE IBOE
QUEBEC
QUETTA
QUIMPER
QUINHAGAK
QUITO
RABAT
RABAUL
RALEIGH
RAMSTEIN
RANGOON
RANTON
RAPID CITY
RAROTONGA
RAS AT TANNURAH
RAS SHUKHIER
RAUMA
RECIFE
RED DEVIL
RED DOG
REDDING
REDSTONE
REGINA
REIMS
RENNES
RENO
RESOLUTE
REUNION
REYKJAVIK
REZE
RICHARDS BAY
RICHLAND
RICHMOND
RIGA
RIJEKA LUKA
RIMINI
RIO
RIO DE JANEIRO
RIO GALLEGOS
RIO DE JANEIRO
RIOJA
RIVERHEAD
RIYAD
RIYADH
ROAD TOWN
ROANNE
ROANOKE
ROATAN
ROCHEFORT
ROCHELLE
ROCHESTER
ROCKFORD
ROCKY MOUNT
RODEZ
ROMA
ROME
ROOSEVELT
ROSARIO
ROSEAU
ROSKILDE
ROTA
ROTHESAY DOCK
ROTTERDAM
ROUEN
ROUSSILLON
RUBY
RUSSIAN MISSION
SAARBRUCKEN
SACRAMENTO
SAFI
SAGANOSEKI
SAGINAW
SAIGON
SAINT GEORGES
SAINT JOHNS
SAINT MICHAEL
SAINT PAUL
SAINT PETERSBURG
SAINT-DENIS
SAINT-ETIENNE
SAINT-ETIENNE DU ROUVRAY
SAINT-JEAN
SAINT-NAZAIRE
SAINT-OMER
SAINT-PETERSBOURG
SAINT-QUENTIN
SAINT-SAUVEUR
SAINT-SULPICE
SAINT-TROPEZ
SAIPAN
SAKAI SENBOKU
SAKHALINSK
SAL
SALDANHA BAY
SALEM
SALMESBURY
SALON-DE-PROVENCE
SALT LAKE CITY
SALTILLO
SALVADOR
SALZBURG
SAN
SAN ANDRES ISLAND
SAN ANGELO
SAN ANTONIO
SAN BERNARDINO
SAN DIEGO
SAN FERNANDO
SAN FERNANDO DE APURE
SAN FRANCISCO
SAN JOSE
SAN JUAN
SAN LUIS POTOSI
SAN PEDRO SULA
SAN SALVADOR
SAN TOME
SANA'A
SANAA
SAND POINT
SANDAKAN
SANTA BARBARA
SANTA CRUZ
SANTA CRUZ DE TENERIFE
SANTA FE
SANTA MARIA
SANTANDER
SANTIAGO
SANTIAGO DE CUBA
SANTIAGO DE COMPOSTELA
SANTO
SANTO DOMINGO
SANTOS
SANTOS DUMONT
SANYA
SANZIBAR
SAO
SAO LUIZ
SAO PAULO
SAO TOME
SAO TOME ISLAND
SAPPORO
SAPPORO
SARAJEVO
SARASOTA
SASEBO
SAULT ST. MARIE
SAUVETERRE-DE-BEARN
SAVANNAH
SAVONA
SCAMMON BAY
SCATSTA
SDE DOV
SEATTLE
SEDONA
SEGRATE
SELDOVIA
SELETAR
SENDAI
SEOUL
SERI
SEVILLA
SEVILLE
SEWARD
SHAGELUK
SHANG HAI
SHANGHAI
SHANNON
SHANTOU
SHARJAH
SHEFFIELD
SHEMYA ISLANDS
SHENYANG
SHENZHEN
SHEREMETYEVO
SHIBUSHI
SHIELDS HARBOR
SHIJIAZHUANG
SHIMIZU
SHIMONOSEKI
SHIRAZ
SHISHMAREF
SHREVEPORT
SHUNG SHAN
SIBENIK
SIBU
SIMFEROPOL
SINGAPORE
SINGAPOUR
SIOUX CITY
SIOUX FALLS
SIRACUSA
SIRRI ISLAND
SITKA
SIZEWELL
SKAGWAY
SKULTE
SLEETMUTE
SOCHI
SOFIA
SOKOTO
SOLDOTNA
SONDERBORG
SONDRE STROMFJORD
SOUTH BEND
SOUTHAMPTON
SPRINGFIELD
ST JOHN
ST LOUIS
ST NAZAIRE
ST-PETERSBURG
ST-PIERRE
ST. DENIS DE LA REUNION
ST. GEORGE
ST. GEORGE ISLAND
ST. HELENA
ST. JOHNS
ST. KITTS
ST. KITTS AND NEVIS
ST. LOUIS
ST. LUCIA
ST. MAARTEN
ST. MARY'S
ST. PAUL
ST. PETERSBURG
ST. PIERRE AND MIQUELON
ST. THOMAS
ST. VINCENT
ST. VINCENT AND THE GRENADINES
STARKVILLE
STAVANGER
STAVENGER
STEAMBOAT SPRING
STEVENS VILLAGE
STOCKHOLM
STOCKPORT
STOCKTON
STOKE POGES
STOKE-ON-TRENT
STONY RIVER
STORLIEN
STRASBOURG
STUDSTRUP
STUTTGART
SUDBURY
SUKHUMI
SUMUBURGH
SUNDERLAND
SUNDSVALL
SUPERIOR
SUR REINE SOFIA
SURABAYA
SUVA
SWANAGE
SWANSEA
SWATOW
SYDNEY
SYRACUSE
SZCZECIN
TABRIZ
TABUK
TACHIBANA
TACNA
TACOMA
TAEGU
TAGONOURA
TAHKOLUOTO
TAI-PEI
TAIF
TAIPEH
TAIPEI
TAIYUAN
TAKAMATSU
TAKORADI
TALARA
TALKEETNA
TALLAHASSEE
TALLINN
TAMANRASSET
TAMIAMI
TAMPA
TAMPERE
TAMPICO
TANANA
TANANARIVE
TANGER
TANGIER
TANJUNGPRIOK
TAPIS
TAPIS OILFIELD
TARABULUS
TARANTO
TARAPOTO
TARAWA
TARBES
TASHKENT
TAWAU
TAZERKA
TBILISI
TEESPORT
TEESSIDE
TEGEL
TEGUCIGALPA
TEHERAN
TEHRAN
TEL AVIV
TEL AVIV-YAFO
TELLER
TEMPELHOF
TEMUCO
TENERIFE
TEPIC
TERCEIRA
TERNEUZEN
TERRACE
TETLIN JUNCTION
TEXARKANA
THANH PHO HO CHI MINH
THANN
THE VALLEY
THESSALONIKI
THESSALONOKI
THIMPHU
THONON
THUNDER BAY
TIANJIN
TIJUANA
TIMISOARA
TINEE
TINGO MARIA
TINGWALL
TINSON
TIRANA
TIRANE
TOBAGO
TOGIAK
TOKSOOK BAY
TOKUSHIMAX
TOKYO
TOLEDO
TOMPKINSVILLE SI
TONGATAPU
TONNERRE
TOPEKA
TORONTO
TORONTO ISLAND
TORREON
TORTOLA
TOTTORI
TOUCY
TOULON
TOULOUSE
TOURS
TOYAMA
TRAVERSE CITY
TRENTON
TRESCO
TREVISO
TRIESTE
TRINCOMALEE HARBOR
TRINITE
TRIPOLI
TRIVANDRUM
TROIS RIVIERES
TROMBETAS
TROMSO
TRONDHEIM
TROYES
TRUJILLO
TRUK
TUCSON
TULSA
TULUKSAK
TUMBES
TUNIS
TUNSTALL
TUNTUTULIAK
TUNUNAK
TURIN
TURKU
TUSCALOOSA
TUXTLA GUTIERREZ
TUZLA
TWIN FALLS
TYLER
UBE
UJUNG PANDANG
UKIAH
ULAANBAATAR
ULAN BATOR
UMEA
UMIAT
UMKUMIUT
UNALAKLEET
UNGALIK
UPPSALA
URUMQI
USSEL
UTOPIA
VAASA
VADUZ
VAL D'OR
VAL D'OR
VALDEZ
VALDOSTA
VALENCIA
VALERA
VALLADOLID
VALLARTA
VALLETTA
VALPARAISO
VANCOUVER
VANNES
VARADERO
VARENGEVILLE
VARSOVIE
VASTERAS
VATICAN
VAXJO
VEGAS
VEJLE
VENETIE
VENICE
VENISE
VERACRUZ
VERNAL
VERONA
VERSAILLES
VICHY
VICTORIA
VICTORIA HARBOR
VIENNA
VIENNE
VIENTIANE
VIEQUES
VIGO
VILLAHERMOSA
VILLANUEVA
VILLEFRANCHE-SUR-SAONE
VILLEPREUX
VILLEURBANNE
VILNIUS
VIRACOPOS
VIROFLAY
VISHAKHAPATNAM
VITROLLES
VLADIVOSTOK
VLISSINGEN
VNUKOVO
VOIRON
VOREPPE
VYBORG
WABUSH
WACO
WADI FEIRAN
WAINWRIGHT
WAKAMATSU
WALLIS
WARSAW
WASHINGTON
WASHINGTON, DC
WATSON LAKE
WAUSAU
WEISBADEN
WELLINGTON
WELLS
WEMBLEY
WENATCHEE
WENDOVER
WEST PALM BEACH
WEST POINT
WESTCHESTER COUNTY
WESTMINSTER
WEVOK
WEYMOUTH
WHITEHALL
WHITEHORSE
WHITTIER
WICHITA
WICHITA FALLS
WIESBADEN
WILKES-BARRE
WILLEMSTAD
WILLIAMSBURG
WILLOW
WILLOW RUN
WILMINGTON
WILSON
WINDHOEK
WINDSOR
WINNIPEG
WINSTON-SALEM
WOOLWICH
WRANGELL
WUHAN
XIAMEN
XIAN
YAKIMA
YAKUTAT
YAMAGATA
YANAN
YANGON
YANTAI
YAOUNDE
YAP CAROLINE ISLAND
YAREN
YELLOWKNIFE
YEREVAN
YINCHUANG
YOKKAICHI
YOKOHAMA
YOKOSUKA
YORK
YUMA
YURIMAGUAS
YUZHNO
ZACATECAS
ZAGREB
ZAHEDAN
ZARAGOZA
ZEEBRUGGE
ZHANJIANG
ZHENGZHOU
ZIHUATANEJO
ZORG EN HOOP
ZORG EN HOOP
ZURICH
ÖSTERSUND
GATESHEAD
MESA
THE HAGUE
SALALA
CAEN
KHOBAR
FREIBURG
MAHALA
GROZNY
VOLGOGRAD
