# Supplementary material for: ScholarLens: extracting competences from research publications for the automatic generation of semantic user profiles
Source: PeerJ journal article supplement (doi:10.7717/peerj-cs.121), 2017-07-03
Supplement: Pipeline.zip [file Pipeline.zip › Pipeline/gate/plugins/ANNIE/resources/gazetteer/city_uk.lst]

Ab Kettleby
Abbas Combe
Abberley
Abberton
Abbess Roding
Abbey Dore
Abbey Hulton
Abbey Road
Abbey St Bathans
Abbey Village
Abbey Wood
Abbeycwmhir
Abbeystead
Abbeytown
Abbot's Salford
Abbotrule
Abbots Bickington
Abbots Bromley
Abbots Langley
Abbots Leigh
Abbots Morton
Abbots Ripton
Abbotsbury
Abbotsham
Abbotskerswell
Abbotsley
Abbotts Ann
Abbottswood
Abdon
Aber
Aber Bargoed
Aber Bowlan
Aber-banc
Aber-cywarch
Aber-llia
Aber-nant
Aber-pergwm
Aberaeron
Aberaman
Aberangell
Aberarad
Aberarder
Aberargie
Aberarth
Aberavon
Aberbeeg
Abercanaid
Abercarn
Abercastle
Abercegir
Aberchalder
Aberchirder
Abercorn
Abercraf
Abercrombie
Abercrychan
Abercwmboi
Abercych
Abercynafon
Abercynon
Aberdalgie
Aberdare
Aberdaron
Aberdeen
Aberdesach
Aberdour
Aberduhonw
Aberdulais
Aberdyfi
Aberedw
Abereiddy
Abererch
Aberfan
Aberfeldy
Aberffraw
Aberffrwd
Aberford
Aberfoyle
Abergarw
Abergavenny
Abergele
Abergiar
Abergorlech
Abergwesyn
Abergwili
Abergwydol
Abergwynant
Abergwynfi
Abergwyngregyn
Abergynolwyn
Aberhafesp
Aberhosan
Aberkenfig
Aberlady
Aberlemno
Aberllefenni
Abermeurig
Abermule
Abernant
Abernethy
Abernyte
Aberporth
Aberriw
Aberscross
Abersky
Abersoch
Abersychan
Aberthin
Abertillery
Abertridwr
Abertysswg
Aberuthven
Aberyscir
Aberystwyth
Abhainnsuidhe
Abingdon
Abinger Common
Abinger Hammer
Abington
Abington Pigotts
Abingworth
Ablington
Abney
Aboyne
Abram
Abriachan
Abridge
Abronhill
Abson
Abthorpe
Abune-the-Hill
Aby
Acaster Malbis
Acaster Selby
Accrington
Accurrach
Acha
Achadacaie
Achadh Mor
Achadh-chaorrunn
Achadunan
Achagavel
Achaglass
Achahoish
Achalader
Achallader
Achamore
Achandunie
Achany
Achaphubuil
Acharacle
Achargary
Acharn
Acharosson
Achateny
Achath
Achavanich
Achentoul
Achfary
Achgarve
Achiemore
Achies
Achiltibuie
Achina
Achindown
Achinduich
Achingills
Achintee
Achintee Ho
Achintraid
Achlean
Achleanan
Achleek
Achlian
Achlyness
Achmelvich
Achmony
Achmore
Achnaba
Achnabat
Achnabourin
Achnacairn
Achnacarnin
Achnacloich
Achnaclyth
Achnacroish
Achnadrish
Achnafalnich
Achnafauld
Achnagairn
Achnagarron
Achnaha
Achnahanat
Achnahannet
Achnalea
Achnamara
Achnasaul
Achnasheen
Achnashelloch
Achnastank
Achorn
Achosnich
Achreamie
Achriabhach
Achriesgill
Achrimsdale
Achtoty
Achurch
Achuvoldrach
Achvaich
Achvarasdal
Achvraie
Ackergill
Acklam
Ackleton
Acklington
Ackton
Ackworth Moor Top
Acle
Acock's Green
Acol
Acomb
Aconbury
Acrefair
Acrise Place
Acton
Acton Beauchamp
Acton Bridge
Acton Burnell
Acton Green
Acton Pigott
Acton Round
Acton Scott
Acton Town
Acton Trussell
Acton Turville
Adamhill
Adbaston
Adber
Adderbury
Adderley
Adderstone
Addiewell
Addingham
Addington
Addlestone
Addlethorpe
Adel
Adeney
Adfa
Adforton
Adisham
Adlestrop
Adlingfleet
Adlington
Admaston
Admington
Adsborough
Adstock
Adstone
Adversane
Advie
Adwalton
Adwell
Adwick le Street
Adwick upon Dearne
Ae Village
Affleck
Affpuddle
Afon-wen
Afton Bridgend
Agglethorpe
Aigburth
Aignis
Aike
Aikerness
Aikers
Aiketgate
Aikton
Aikwood Tower
Ailey
Ailsworth
Aimster
Ainderby Quernhow
Ainderby Steeple
Aingers Green
Ainsdale
Ainstable
Ainsworth
Ainthorpe
Aintree
Aird
Aird a' Mhulaidh
Aird a'Mhachair
Aird Asaig
Aird Dhail
Aird Leimhe
Aird Mhige
Aird Mhighe
Aird of Sleat
Aird Thunga
Aird Uige
Airdrie
Airidh a'Bhruaich
Airieland
Airies
Airigh-drishaig
Airmyn
Airntully
Airor
Airth
Airton
Airyhassen
Aisby
Aisgernis
Aiskew
Aislaby
Aith
Aitnoch
Akeld
Akeley
Akenham
Albaston
Alberbury
Albourne
Albrighton
Alburgh
Albury
Albury Heath
Alby Hill
Alcaig
Alcaston
Alcester
Alciston
Alcombe
Alconbury
Alconbury Hill
Alconbury Weston
Aldborough
Aldbourne
Aldbrough
Aldbrough St John
Aldburgh
Aldbury
Aldclune
Aldeburgh
Aldeby
Aldenham
Alderbury
Alderford
Alderholt
Alderley
Alderley Edge
Alderman's Green
Aldermaston
Aldermaston Soke
Aldermaston Wharf
Alderminster
Alderney
Aldersbrook
Aldersey Green
Aldersgate
Aldershot
Alderton
Alderwasley
Aldfield
Aldford
Aldgate
Aldgate East
Aldham
Aldie
Aldingbourne
Aldingham
Aldington
Aldivalloch
Aldochlay
Aldons
Aldreth
Aldridge
Aldringham
Aldro
Aldsworth
Aldunie
Aldville
Aldwark
Aldwick
Aldwincle
Aldworth
Aldwych
Alexandra Palace
Alexandra Park
Alexandria
Alfardisworthy
Alfington
Alfold
Alfold Crossways
Alford
Alfreton
Alfrick
Alfriston
Algarkirk
Alhampton
Alkborough
Alkerton
Alkham
Alkington
Alkmonton
All Cannings
All Saints
All Saints South Elmham
All Stretton
Allaleigh
Allanaquoich
Allancreich
Allangillfoot
Allanton
Allardice
Allathasdal
Allen's Green
Allendale Town
Allenheads
Allensford
Allensmore
Aller
Allerby
Allerford
Allerston
Allerthorpe
Allerton
Allerton Bywater
Allesley
Allestree
Allexton
Allgreave
Allhallows
Alligin Shuas
Allimore Green
Allington
Allithwaite
Allnabad
Alloa
Allonby
Alloway
Allscot
Allt na h-Airbhe
Allt-na-subh
Alltachonaich
Alltbeithe
Alltforgan
Alltmawr
Alltnacaillich
Alltsigh
Alltwalis
Alltwen
Alltyblaca
Allweston
Almeley
Almer
Almington
Almiston Cross
Almond-bank
Almondbury
Almonds-bury
Alne
Alness
Alnham
Alnmouth
Alnwick
Alperton
Alphamstone
Alpheton
Alphington
Alpington
Alport
Alpraham
Alresford
Alrewas
Alrick
Alsager
Alsagers Bank
Alsop en le Dale
Alston
Alstone
Alstonefield
Alswear
Altanduin
Altarnun
Altass
Altens
Alterwall
Altham
Althorne
Althorpe
Alticry
Altnafeadh
Altnaharra
Altofts
Alton
Alton Barnes
Alton Pancras
Alton Priors
Altonside
Altrincham
Altura
Alva
Alvanley
Alvaston
Alvechurch
Alvecote
Alvediston
Alveley
Alverdiscott
Alverstoke
Alverstone
Alverton
Alves
Alvescot
Alveston
Alvie
Alvingham
Alvington
Alwalton
Alwinton
Alwoodley
Alwoodley Park
Alyth
Amalebra
Amber Hill
Ambergate
Amberley
Amble
Amblecote
Ambleside
Ambleston
Ambrismore
Ambrosden
Amcotts
Amersham
Amesbury
Amington
Amisfield Town
Amlwch
Amlwch Port
Ammanford
Amotherby
Ampfield
Ampleforth
Ampney Crucis
Ampney St Mary
Ampney St Peter
Amport
Ampthill
Ampton
Amroth
Amulree
An t-Ob
Anaboard
Anaheilt
Ancaster
Anchor
Ancroft
Ancrum
Ancton
Anderby
Anderson
Anderton
Andover
Andover Down
Andoversford
Andreas
Anelog
Anerley
Angarrack
Angel
Angersleigh
Angle
Angler's Retreat
Angmering
Angram
Anie
Ankerville
Anlaby
Anmer
Anna Valley
Annan
Annaside
Annat
Annbank
Annesley
Annesley Woodhouse
Annfield Plain
Annscroft
Ansdell
Ansford
Ansley
Anslow
Anslow Gate
Anstey
Anstruther
Ansty
Anthill Common
Anthorn
Antingham
Anton's Gowt
Antony
Antrobus
Anvil Corner
Anwick
Anwoth
Aoradh
Apes Hall
Apethorpe
Apley
Apperknowle
Apperley
Appleby
Appleby Magna
Appleby Parva
Appleby-in-Westmorland
Applecross
Appledore
Appledore Heath
Appleford
Appleshaw
Applethwaite
Appleton
Appleton Roebuck
Appleton Thorn
Appleton Wiske
Appleton-le-Moors
Appleton-le-Street
Appletreehall
Appletreewick
Appley
Appley Bridge
Apse Heath
Apsley
Apsley End
Apuldram
Arbirlot
Arborfield
Arborfield Cross
Arborfield Garrison
Arbroath
Arbuthnott
Archdeacon Newton
Archiestown
Archway
Arclid
Ard a'Chapuill
Ardacheranbeg
Ardacheranmor
Ardachvie
Ardalanish
Ardallie
Ardanaiseig
Ardaneaskan
Ardanstur
Ardarroch
Ardbeg
Ardbrecknish
Ardcharnich
Ardchiavaig
Ardchonnell
Ardchronie
Ardchullarie More
Ardchyle
Arddlin
Ardeley
Ardelve
Arden
Ardens Grafton
Ardentallan
Ardentinny
Ardeonaig
Ardersier
Ardery
Ardessie
Ardfern
Ardfin
Ardgartan
Ardgay
Ardgenavan
Ardgowan
Ardgowse
Ardgye
Ardhallow
Ardheslaig
Ardiecow
Ardinamar
Ardindrean
Ardingly
Ardington
Ardintoul
Ardkinglas Ho
Ardlair
Ardlamont
Ardleigh
Ardleish
Ardler
Ardley
Ardlui
Ardlussa
Ardmaddy
Ardmair
Ardmaleish
Ardmay
Ardmenish
Ardmhor
Ardminish
Ardmolich
Ardmore
Ardnackaig
Ardnacross
Ardnadam
Ardnagoine
Ardnagowan
Ardnagrask
Ardnahein
Ardnahoe
Ardnarff
Ardnastang
Ardnave
Ardno
Ardo
Ardoch
Ardochu
Ardoyne
Ardpatrick
Ardpeaton
Ardradnaig
Ardrishaig
Ardroe
Ardrossan
Ardscalpsie
Ardshave
Ardshealach
Ardsley
Ardslignish
Ardtalla
Ardtalnaig
Ardtarig
Ardteatle
Ardtoe
Ardtornish
Ardtrostan
Ardtur
Arduaine
Ardullie
Ardura
Ardvar
Ardvasar
Ardveich
Ardverikie
Ardvorlich
Ardwall
Ardwell
Areley Kings
Arford
Argaty
Argoed
Argoed Mill
Argrennan
Arichamish
Arichastlich
Arichonan
Aridhglas
Arienskill
Arileod
Arinacrinachd
Arinafad Beg
Arinagour
Arinambane
Arisaig
Arivegaig
Arkendale
Arkesden
Arkholme
Arkleby
Arkley
Arksey
Arkwright
Arlary
Arlecdon
Arlesey
Arleston
Arley
Arlingham
Arlington
Armadale
Armagh
Armathwaite
Arminghall
Armitage
Armscote
Armston
Armthorpe
Arnabost
Arncliffe
Arncliffe Cote
Arncroach
Arne
Arnesby
Arngask
Arngibbon
Arngomery
Arnhall
Arnicle
Arnipol
Arnisdale
Arnish
Arniston Engine
Arnol
Arnold
Arnprior
Arnside
Arowry
Arrad Foot
Arradoul
Arram
Arrat
Arrathorne
Arreton
Arrington
Arrivain
Arrochar
Arrow
Arscaig
Arsenal
Arthingworth
Arthog
Arthrath
Arthurstone
Artrochie
Aruadh
Arundel
Aryhoulan
Asby
Ascog
Ascot
Ascott
Ascott-under-Wychwood
Ascreavie
Asenby
Asfordby
Asfordby Hill
Asgarby
Ash
Ash Bullayne
Ash Magna
Ash Mill
Ash Priors
Ash Thomas
Ash Vale
Ash,Canterbury
Ash,Sevenoaks
Ashampstead
Ashbocking
Ashbourne
Ashbrittle
Ashburnham Place
Ashburton
Ashbury
Ashby
Ashby by Partney
Ashby cum Fenby
Ashby de la Launde
Ashby de la Zouch
Ashby Folville
Ashby Magna
Ashby Parva
Ashby Puerorum
Ashby St Ledgers
Ashby St Mary
Ashchurch
Ashcombe
Ashcott
Ashdon
Ashe
Asheldham
Ashen
Ashenden
Ashendon
Ashens
Ashfield
Ashfield Green
Ashfold Crossways
Ashford
Ashford Bowdler
Ashford Carbonel
Ashford Hill
Ashford in the Water
Ashgill
Ashiestiel
Ashill
Ashingdon
Ashington
Ashkirk
Ashleworth
Ashley
Ashley Green
Ashley Heath
Ashmanhaugh
Ashmansworth
Ashmansworthy
Ashmore
Ashorne
Ashover
Ashow
Ashperton
Ashprington
Ashreigney
Ashtead
Ashton
Ashton Common
Ashton Keynes
Ashton under Hill
Ashton upon Mersey
Ashton-in-Makerfield
Ashton-under-Lyne
Ashurst
Ashurstwood
Ashwater
Ashwell
Ashwellthorpe
Ashwick
Ashwicken
Ashybank
Askam in Furness
Askern
Askerswell
Askett
Askham
Askham Bryan
Askham Richard
Asknish
Askrigg
Askwith
Aslackby
Aslacton
Aslockton
Asloun
Aspall
Aspatria
Aspenden
Aspley Guise
Aspull
Asselby
Assington
Astbury
Astcote
Asterby
Asterley
Asterton
Asthall
Asthall Leigh
Astley
Astley Abbotts
Astley Bridge
Astley Cross
Astley Green
Aston
Aston Abbotts
Aston Botterell
Aston Cantlow
Aston Clinton
Aston Crews
Aston Cross
Aston End
Aston Eyre
Aston Fields
Aston Flamville
Aston Ingham
Aston juxta Mondrum
Aston le Walls
Aston Magna
Aston Munslow
Aston on Clun
Aston on Trent
Aston Rogers
Aston Rowant
Aston Sandford
Aston Somerville
Aston Subedge
Aston Tirrold
Aston Upthorpe
Aston-by-Stone
Astwick
Astwood
Astwood Bank
Aswarby
Aswardby
Aswick Grange
Atch Lench
Atcham
Athelington
Athelney
Athelstaneford
Atherington
Atherstone
Atherstone on Stour
Atherton
Athlinne
Atlow
Attadale
Attenborough
Atterby
Attleborough
Attlebridge
Atwick
Atworth
Aubourn
Auch
Auchachenna
Auchairne
Auchallater
Auchameanach
Aucharnie
Aucharrigill
Auchattie
Auchavan
Auchbraad
Auchbreck
Auchenblae
Auchenbothie
Auchenbrack
Auchenbreck
Auchencairn
Auchencrow
Auchendinny
Auchendolly
Auchenfoyle
Auchengray
Auchenhalrig
Auchenheath
Auchenhessnane
Auchenlochan
Auchenmalg
Auchenrivock
Auchentiber
Auchessan
Auchgourish
Auchinafaud
Auchincruive
Auchindarrach
Auchindarroch
Auchindrain
Auchindrean
Auchininna
Auchinleck
Auchinloch
Auchinner
Auchintoul
Auchinvennal
Auchiries
Auchleven
Auchlochan
Auchlunachan
Auchlunies
Auchlunkart
Auchlyne
Auchmacoy
Auchmair
Auchmithie
Auchmuirbridge
Auchmull
Auchnabony
Auchnabreac
Auchnacloich
Auchnacraig
Auchnacree
Auchnafree
Auchnagallin
Auchnagatt
Auchnaha
Auchnangoul
Aucholzie
Auchorrie
Auchraw
Auchreoch
Auchronie
Auchterarder
Auchtercairn
Auchterderran
Auchterhouse
Auchtermuchty
Auchterneed
Auchtertool
Auchtertyre
Auchtoo
Auckengill
Auckley
Audenshaw
Audlem
Audley
Audley End
Auds
Aughton
Aughton Park
Auldearn
Aulden
Auldhame
Auldhouse
Aulich
Ault a'chruinn
Ault Hucknall
Aultanrynie
Aultbea
Aultgrishan
Aultguish Inn
Aultiphurst
Aultmore
Aultnagoire
Aultnapaddock
Aulton
Aultvoulin
Aundorach
Aunk
Aunsby
Auquhorthies
Aust
Austerfield
Austonley
Austrey
Austwick
Authorpe
Authorpe Row
Avebury
Aveley
Avening
Averham
Avery Hill
Aveton Gifford
Avielochan
Aviemore
Avington
Avoch
Avon
Avon Dassett
Avonbridge
Avonmouth
Avonwick
Awbridge
Awhirk
Awkley
Awliscombe
Awre
Awsworth
Axbridge
Axford
Axminster
Axmouth
Aycliffe
Aydon
Aylburton
Ayle
Aylesbeare
Aylesbury
Aylesby
Aylesford
Aylesham
Aylestone
Aylmerton
Aylsham
Aylton
Aymestrey
Aynho
Ayot St Lawrence
Ayot St Peter
Ayr
Aysgarth
Ayshford
Ayside
Ayston
Aythorpe Roding
Ayton
Aywick
Azerley
Babbacombe
Babbinswood
Babcary
Babel
Babell
Babeny
Babraham
Babworth
Bac
Back of Keppoch
Backaland
Backaskaill
Backbarrow
Backburn
Backfolds
Backford
Backhill
Backhill of Clackriach
Backhill of Trustach
Backies
Backlass
Backmuir of New Gilston
Backside
Backwell
Backworth
Bacon End
Baconsthorpe
Bacton
Bacup
Badachro
Badanloch Lodge
Badavanich
Badbea
Badbury
Badby
Badcall
Badcaul
Baddeley Green
Badden
Baddesley Ensor
Baddidarach
Badenscoth
Badenyon
Badger
Badgerbank
Badgers Mount
Badgeworth
Badgworth
Badicaul
Badingham
Badintagairt
Badlesmere
Badley
Badlipster
Badluarchrach
Badminton
Badnaban
Badnabay
Badnafrave
Badnagie
Badninish
Badrallach
Badsey
Badshot Lea
Badsworth
Badwell Ash
Badyo
Bag Enderby
Bagby
Bagendon
Baggrow
Baghasdal
Bagillt
Baginton
Baglan
Bagley
Bagnall
Bagnor
Bagshot
Bagstone
Bagthorpe
Baguley
Bagworth
Bagwyllydiart
Baildon
Baile a'Mhanaich
Baile Ailein
Baile an Truiseil
Baile Boidheach
Baile Gharbhaidh
Baile Glas
Baile Mhic Phail
Baile Mor
Baile na Cille
Baile nan Cailleach
Baile Raghaill
Bailebeag
Bailliesward
Bainbridge
Bainsford
Bainshole
Bainton
Bairnkine
Bakebare
Baker Street
Baker's End
Bakewell
Bala
Balachuirn
Balafark
Balaldie
Balavil
Balbeg
Balbeggie
Balbirnie
Balbithan
Balblair
Balcharn
Balcherry
Balchers
Balchladich
Balchraggan
Balchrick
Balcombe
Balcurvie
Baldernock
Baldersby
Balderstone
Balderton
Baldhu
Baldinnie
Baldock
Baldovie
Baldrine
Baldslow
Baldwin
Baldwin's Gate
Baldwinholme
Bale
Balelone
Balemartine
Balendoch
Balephuil
Balerno
Balernock
Balfield
Balfour
Balfron
Balfron Station
Balgavies
Balgedie
Balgonar
Balgove
Balgowan
Balgown
Balgray
Balgreen
Balgreggan
Balgy
Balhaldie
Balhalgardy
Balham
Balhary
Balhelvie
Balhousie
Baliasta
Baligill
Baligrundle
Balindore
Balintore
Balintraid
Balintyre
Balkeerie
Balkholme
Balkissock
Ball Haye Green
Ball Hill
Ballabeg
Ballacannell
Ballacarnane Beg
Ballachulish
Balladoole
Ballafesson
Ballagyr
Ballajora
Ballakilpheric
Ballamodha
Ballantrae
Ballards Gore
Ballasalla
Ballater
Ballaterach
Ballaugh
Ballaveare
Ballechin
Balleich
Ballencrieff
Ballidon
Balliekine
Balliemeanoch
Balliemore
Ballig
Ballimeanoch
Ballimore
Ballinaby
Ballindean
Ballingdon
Ballinger Common
Ballingham
Ballingry
Ballinlick
Ballinluig
Ballintuim
Balloch
Ballochan
Ballochandrain
Ballochford
Ballochgair
Ballochmartin
Ballochmorrie
Ballochmyle
Ballochroy
Ballogie
Balls Cross
Balls Pond Road
Ballyaurgan
Ballygown
Ballygrant
Ballymeanoch
Ballymichael
Balmacara
Balmaclellan
Balmacneil
Balmadies
Balmae
Balmaha
Balmalcolm
Balmartin
Balmeanach
Balmedie
Balmerino
Balmerlawn
Balminnoch
Balmore
Balmullo
Balmungie
Balmyle
Balnaboth
Balnabruaich
Balnacra
Balnafoich
Balnagall
Balnagown Castle
Balnaguard
Balnaguisich
Balnahard
Balnain
Balnakeil
Balnaknock
Balnamoon
Balnapaling
Balnespick
Balquhidder
Balsall
Balsall Common
Balscote
Balsham
Baltasound
Balterley
Baltersan
Balthangie
Balthayock
Baltonsborough
Baluachraig
Balure
Balvaird
Balvarran
Balvicar
Balvraid
Bamber Bridge
Bamber's Green
Bamburgh
Bamff
Bamford
Bampton
Banavie
Banbury
Banc-y-ffordd
Bancffosfelen
Banchor
Banchory
Banchory-Devenick
Bancyfelin
Bandon
Banff
Bangor
Bangor Teifi
Bangor-is-y-coed
Banham
Bank End
Bank Newton
Bank Street
Bankend
Bankfoot
Bankhead
Banknock
Bankshill
Banningham
Bannister Green
Bannockburn
Banstead
Bantham
Banton
Banwell
Bapchild
Baptiston
Bar Hill
Barachander
Barassie
Barbaraville
Barber Booth
Barbican
Barbon
Barbrook
Barby
Barcaldine
Barcaple
Barcheston
Barcombe
Barcombe Cross
Barden
Bardennoch
Bardfield End Green
Bardfield Saling
Bardister
Bardney
Bardon
Bardon Mill
Bardsea
Bardsey
Bardsley
Bardwell
Barewood
Barfad
Barford
Barford St John
Barford St Martin
Barford St Michael
Barfreston
Bargaly
Bargany
Bargoed
Bargrennan
Barham
Barharrow
Barholm
Barkby
Barkby Thorpe
Barkestone-le-Vale
Barkham
Barking
Barking & Dagenham
Barkingside
Barkisland
Barkston
Barkway
Barlaston
Barlavington
Barlay
Barlborough
Barlby
Barlestone
Barley
Barleycroft End
Barleyhill
Barleythorpe
Barling
Barlings
Barlow
Barmby Moor
Barmby on the Marsh
Barmer
Barmolloch
Barmoor Lane End
Barmouth
Barmpton
Barmston
Barnacabber
Barnacarry
Barnack
Barnacle
Barnard Castle
Barnard's Green
Barnardiston
Barnbarroch
Barnburgh
Barnby
Barnby Dun
Barnby in the Willows
Barnby Moor
Barndennoch
Barnes
Barnes Bridge
Barnet
Barnetby le Wold
Barney
Barnham
Barnham Broom
Barnhead
Barnhill
Barnhills
Barningham
Barnoldby le Beck
Barnoldswick
Barns Green
Barnsbury
Barnsley
Barnstaple
Barnston
Barnstone
Barnt Green
Barnton
Barnwell All Saints
Barnwell St Andrew
Barnwood
Barons Court
Barr
Barr Hall
Barraer
Barraglom
Barrahormid
Barrapol
Barrasford
Barravullin
Barregarrow
Barrhead
Barrhill
Barrington
Barripper
Barrisdale
Barrmill
Barrnacarry
Barrock
Barrow
Barrow Gurney
Barrow Haven
Barrow Nook
Barrow Street
Barrow upon Humber
Barrow upon Soar
Barrow upon Trent
Barrow-in-Furness
Barrowby
Barrowden
Barrowford
Barry
Barsby
Barsham
Barskimming
Barsloisnach
Barston
Bartestree
Barthol Chapel
Barthomley
Bartley
Bartlow
Barton
Barton Bendish
Barton Common
Barton End
Barton Hartshorn
Barton in Fabis
Barton in the Beans
Barton Mills
Barton on Sea
Barton Seagrave
Barton St David
Barton Stacey
Barton Stacey Camp
Barton Turf
Barton-le-Clay
Barton-le-Street
Barton-le-Willows
Barton-on-the-Heath
Barton-under-Needwood
Barton-upon-Humber
Barvas
Barway
Barwell
Barwhinnock
Barwick
Barwick in Elmet
Barwinnock
Baschurch
Bascote
Basford Green
Bashall Eaves
Bashall Town
Bashley
Basildon
Basingstoke
Baslow
Bason Bridge
Bassaleg
Bassenthwaite
Bassett
Bassett's Cross
Bassingbourn
Bassingfield
Bassingham
Bassingthorpe
Basta
Baston
Bastwick
Batchworth
Batchworth Heath
Batcombe
Bate Heath
Bath
Bath-easton
Bathampton
Bathealton
Bathford
Bathgate
Bathley
Bathpool
Batley
Batsford
Batt's Corner
Battersby
Battersea
Battisborough Cross
Battisford
Battisford Tye
Battlesbridge
Battlesden
Battleton
Battramsley
Bauds of Cullen
Baugh
Baughton
Baughurst
Baulds
Baulking
Baumber
Baunton
Baveney Wood
Baverstock
Bawburgh
Bawdeswell
Bawdrip
Bawdsey
Bawtry
Baxenden
Baxterley
Baycliff
Baydon
Bayford
Bayfordbury
Bayham Abbey
Bayles
Baylham
Baynards Green
Baysham
Bayston Hill
Bayswater
Bayswater Road
Baythorn End
Bayton
Beach
Beachampton
Beachborough
Beachley
Beacon End
Beacon Hill
Beacon's Bottom
Beaconsfield
Beadlam
Beadnell
Beaford
Beal
Beambridge
Beamhurst
Beaminster
Beamish
Beamsley
Bean
Beanacre
Beanley
Beaquoy
Beardon
Beare Green
Bearley
Bearnie
Bearnock
Bearpark
Bearsbridge
Bearsden
Bearsted
Bearwood
Beattock
Beauchamp Roding
Beauchief
Beaudesert
Beaufort
Beaulieu
Beauly
Beaumaris
Beaumont
Beausale
Beauworth
Beaworthy
Beazley End
Bebington
Bebside
Beccles
Becconsall
Beck Foot
Beck Hole
Beck Row
Beck Side
Beckbury
Beckenham
Beckermet
Beckfoot
Beckford
Beckhampton
Beckingham
Beckington
Beckley
Beckton
Beckwithshaw
Becontree
Becontree Heath
Bedale
Bedburn
Bedchester
Beddau
Beddgelert
Beddingham
Beddington
Beddington Corner
Bedfield
Bedford
Bedford Park
Bedgebury Cross
Bedhampton
Bedingfield
Bedlington
Bedlinog
Bedmond
Bednall
Bedol
Bedrule
Bedstone
Bedwas
Bedwellty
Bedworth
Beeby
Beech
Beech Hill
Beechamwell
Beechingstoke
Beedon
Beeford
Beeley
Beelsby
Beenham
Beer Hackett
Beercrocombe
Beesands
Beesby
Beeson
Beeston
Beeston Regis
Beeston St Lawrence
Beeswing
Beetham
Beetley
Began
Begbroke
Begelly
Beggshill
Beguildy
Beighton
Beith
Bekesbourne
Belaugh
Belbroughton
Belchamp Otten
Belchamp St Paul
Belchamp Walter
Belchford
Belfast
Belford
Belgrave
Belgravia
Belhaven
Belhelvie
Belhinnie
Bell Bar
Bell Busk
Bell End
Bellabeg
Belladrum
Bellanoch
Bellasize
Bellaty
Belleau
Bellerby
Bellever
Belliehill
Bellingdon
Bellingham
Belloch
Bellochantuy
Bells Yew Green
Bellsdyke
Bellshill
Bellside
Bellsquarry
Belluton
Belmaduthy
Belmesthorpe
Belmont
Belowda
Belper
Belper Lane End
Belsay
Belsford
Belsize Park
Belstead
Belston
Belstone
Belstone Corner
Belsyde
Belthorn
Beltinge
Beltoft
Belton
Beltring
Belvedere
Belvoir
Bembridge
Bemersyde
Bempton
Ben Alder Cottage
Ben Alder Lodge
Benacre
Benbuie
Benderloch
Bendish
Benenden
Benfield
Bengate
Bengeo
Benholm
Beningbrough
Benington
Benington Sea End
Benllech
Benmore
Bennacott
Bennan
Benniworth
Benover
Benson
Benthall
Bentham
Benthoul
Bentley
Bentley Heath
Benton
Benton Square
Bentpath
Bentworth
Benvie
Benville Lane
Benwick
Beoley
Bepton
Berden
Bere Alston
Bere Ferrers
Bere Regis
Berea
Berepper
Bergh Apton
Berinsfield
Berkeley
Berkhamsted
Berkley
Berkswell
Bermondsey
Bernera
Berners Roding
Bernice
Bernisdale
Berrick Salome
Berriedale
Berrington
Berrow
Berrow Green
Berry Hill
Berry Pomeroy
Berryhillock
Berrynarbor
Bersham
Berstane
Berwick
Berwick Bassett
Berwick Hill
Berwick St James
Berwick St John
Berwick St Leonard
Berwick-upon-Tweed
Bescar
Besford
Bessacarr
Bessels Leigh
Bessingby
Bessingham
Best Beech Hill
Besthorpe
Beswick
Betchworth
Bethania
Bethel
Bethersden
Bethesda
Bethlehem
Bethnal Green
Betley
Betsham
Betteshanger
Bettiscombe
Bettisfield
Betton
Bettws
Bettws Bledrws
Bettws Cedewain
Bettws Evan
Bettws Gwerfil Goch
Bettws Newydd
Bettws-y-crwyn
Bettyhill
Betws
Betws Disserth
Betws Garmon
Betws-y-coed
Betws-yn-Rhos
Beulah
Bevendean
Bevercotes
Beverley
Beverstone
Bevington
Bewaldeth
Bewcastle
Bewdley
Bewerley
Bewholme
Bewley Common
Bexhill
Bexley
Bexleyheath
Bexwell
Beyton
Beyton Green
Bhalamus
Bhaltos
Bhatarsaigh
Biallaid
Bibury
Bicester
Bickenhall
Bickenhill
Bicker
Bickerstaffe
Bickerton
Bickford
Bickham Bridge
Bickham House
Bickington
Bickleigh
Bickleton
Bickley
Bickley Moss
Bickley Town
Bicknacre
Bicknoller
Bicknor
Bickton
Bicton
Bicton Heath
Bidborough
Biddenden
Biddenham
Biddestone
Biddisham
Biddlesden
Biddlestone
Biddulph
Biddulph Moor
Bideford
Bidford-on-Avon
Bidston
Bielby
Bieldside
Bierley
Bierton
Big Sand
Bigbury
Bigbury-on-Sea
Bigby
Bigert Mire
Biggar
Biggin
Biggin Hill
Biggings
Biggleswade
Bighouse
Bighton
Bignor
Bigton
Bilberry
Bilborough
Bilbrook
Bilbrough
Bilbster
Bildershaw
Bildeston
Billericay
Billesdon
Billesley
Billholm
Billingborough
Billinge
Billingford
Billingham
Billinghay
Billingley
Billingsgate
Billingshurst
Billingsley
Billington
Billockby
Billy Row
Bilsborrow
Bilsby
Bilsdean
Bilsham
Bilsington
Bilsthorpe
Bilston
Bilstone
Bilting
Bilton
Bimbister
Binbrook
Bincombe
Bindal
Binegar
Bines Green
Binfield
Binfield Heath
Bingfield
Bingham
Bingham's Melcombe
Bingley
Binham
Binley
Binniehill
Binsoe
Binstead
Binsted
Binton
Bintree
Binweston
Birch
Birch Green
Birch Heath
Birch Vale
Bircham Newton
Bircham Tofts
Birchanger
Bircher
Birchfield
Birchgrove
Birchington
Birchover
Bircotes
Bird End
Birdbrook
Birdfield
Birdham
Birdingbury
Birdlip
Birdsall
Birdsgreen
Birdsmoor Gate
Birdwell
Birdwood
Birgham
Birichen
Birkby
Birkdale
Birkenhead
Birkenhills
Birkenshaw
Birkhall
Birkhill
Birkin
Birkwood
Birley
Birley Carr
Birling
Birling Gap
Birlingham
Birmingham
Birnam
Birsay
Birse
Birsemore
Birstall
Birstall Smithies
Birstwith
Birthorpe
Birtley
Birts Street
Bisbrooke
Bisham
Bishampton
Bishop Auckland
Bishop Burton
Bishop Middleham
Bishop Monkton
Bishop Norton
Bishop Sutton
Bishop Thornton
Bishop Wilton
Bishop's Castle
Bishop's Caundle
Bishop's Cleeve
Bishop's Frome
Bishop's Green
Bishop's Hull
Bishop's Itchington
Bishop's Lydeard
Bishop's Nympton
Bishop's Offley
Bishop's Stortford
Bishop's Sutton
Bishop's Tachbrook
Bishop's Tawton
Bishop's Waltham
Bishop's Wood
Bishopbridge
Bishopbriggs
Bishopmill
Bishops Cannings
Bishopsbourne
Bishopsgate
Bishopsteignton
Bishopstoke
Bishopston
Bishopstone
Bishopstrow
Bishopswood
Bishopsworth
Bishopthorpe
Bishopton
Bishton
Bisley
Bispham
Bissoe
Bisterne
Bisterne Close
Bitchfield
Bittadon
Bittaford
Bittering
Bitterley
Bitterne
Bitteswell
Bitton
Bix
Bixter
Blaby
Black Bourton
Black Callerton
Black Clauchrie
Black Corries Lodge
Black Cross
Black Dog
Black Heddon
Black Marsh
Black Mount
Black Notley
Black Pill
Black Torrington
Blackacre
Blackadder
Blackawton
Blackborough
Blackborough End
Blackboys
Blackbraes
Blackbrook
Blackburn
Blackcastle
Blackchambers
Blackcraig
Blackden Heath
Blackdog
Blackdown
Blackfield
Blackford
Blackfordby
Blackfriars
Blackgang
Blackhall
Blackhall Colliery
Blackham
Blackheath
Blackheath Park
Blackhill
Blackhillock
Blackhills
Blackhorse Road
Blackland
Blacklunans
Blackmill
Blackmoor
Blackmoor Gate
Blackmore
Blackmore End
Blackness
Blacknest
Blacko
Blackpool
Blackpool Gate
Blackridge
Blackrock
Blackrod
Blackshaw
Blackshaw Head
Blacksmith's Corner
Blackstone
Blackthorn
Blackthorpe
Blacktoft
Blacktop
Blacktown
Blackwall
Blackwater
Blackwaterfoot
Blackwell
Blackwells End
Blackwood
Blackwood Hill
Blacon
Bladbean
Blades
Bladnoch
Bladon
Blaen Dyryn
Blaen-y-coed
Blaenannerch
Blaenau Dolwyddelan
Blaenau Ffestiniog
Blaenavon
Blaenawey
Blaencwm
Blaenffos
Blaengarw
Blaengweche
Blaengwrach
Blaengwynfi
Blaenos
Blaenpennal
Blaenplwyf
Blaenporth
Blaenrhondda
Blaenwaun
Blagdon
Blagdon Hill
Blaich
Blaina
Blair Atholl
Blair Drummond
Blair's Ferry
Blairannaich
Blairbuie
Blairgowrie
Blairhall
Blairhoyle
Blairhullichan
Blairingone
Blairlogie
Blairmore
Blairnairn
Blairnamarrow
Blairpark
Blairquhan
Blairquhosh
Blairshinnoch
Blairuskinmore
Blairvadach
Blairydryne
Blairythan
Blaisdon
Blakebrook
Blakedown
Blakelaw
Blakemere
Blakeney
Blakenhall
Blakeshall
Blakesley
Blanchland
Bland Hill
Blandford Camp
Blandford Forum
Blandford St Mary
Blanefield
Blankney
Blar a'Chaorainn
Blargie
Blarglas
Blarmachfoldach
Blarnalevoch
Blashford
Blaston
Blatherwycke
Blawith
Blaxhall
Blaxton
Blaydon
Bleadney
Bleadon
Bleak Hey Nook
Blean
Bleasby
Bleatarn
Blebocraigs
Bleddfa
Bledington
Bledlow
Bledlow Ridge
Blencarn
Blencogo
Blencow
Blendworth
Blennerhasset
Blervie Castle
Bletchingdon
Bletchingley
Bletchley
Bletherston
Bletsoe
Blewbury
Blickling
Blidworth
Blindburn
Blindcrake
Blindley Heath
Blisland
Bliss Gate
Blissford
Blisworth
Blithbury
Blitterlees
Blo Norton
Blockley
Blofield
Bloomsbury
Blore
Blossomfield
Blount's Green
Bloxham
Bloxholm
Bloxwich
Bloxworth
Blubber-houses
Blue Anchor
Blue Bell Hill
Blundeston
Blunham
Blunsdon St Andrew
Bluntisham
Blunts
Blyborough
Blyford
Blymhill
Blyth
Blyth Bridge
Blythburgh
Blythe Bridge
Blythe Marsh
Blyton
Bo'ness
Boarhills
Boarhunt
Boars Hill
Boarshead
Boarstall
Boarzell
Boasley Cross
Boat o' Brig
Boat of Garten
Boath
Bobbing
Bobbington
Bobbingworth
Bocaddon
Bochastle
Bockhampton
Bocking
Bocking Churchstreet
Boconnoc
Boddam
Boddington
Bodedern
Bodelwyddan
Bodenham
Bodenham Moor
Bodesbeck
Bodewryd
Bodfari
Bodffordd
Bodfuan
Bodham Street
Bodiam
Bodicote
Bodieve
Bodinnick
Bodior
Bodle Street Green
Bodmin
Bodney
Bodorgan
Bodsham Green
Bodwen
Bogallan
Bogbain
Bogbrae
Bogbuie
Bogend
Bogfern
Bogfields
Bogfold
Boghead
Boghole Fm
Bogmoor
Bogniebrae
Bognor Regis
Bograxie
Bogroy
Bogside
Bogton
Bogue
Bohenie
Bohortha
Bohuntine
Boirseam
Bojewyan
Bolam
Bolberry
Bold Heath
Bolderwood
Boldon
Boldre
Boldron
Bole
Bolehill
Boleigh
Boleside
Bolfracks
Bolgoed
Bolham
Bolham Water
Bolingey
Bollington
Bolney
Bolnhurst
Bolshan
Bolsover
Bolsterstone
Bolstone
Boltby
Bolter End
Bolton
Bolton Abbey
Bolton Bridge
Bolton by Bowland
Bolton Low Houses
Bolton Percy
Bolton upon Dearne
Bolton-le-Sands
Bolton-on-Swale
Boltonfellend
Boltongate
Bolventor
Bombie
Bomere Heath
Bon-y-maen
Bonar Bridge
Bonawe
Bonawe Quarries
Bonby
Boncath
Bonchester Bridge
Bonchurch
Bond Street
Bondleigh
Bonehill
Bonhill
Boningale
Bonjedward
Bonkle
Bonnington
Bonnybank
Bonnybridge
Bonnykelly
Bonnyrigg
Bonnyton
Bonsall
Bont
Bont Dolgadfan
Bont Newydd
Bont-goch
Bontddu
Bontnewydd
Bontuchel
Bonvilston
Boohay
Booker
Booley
Boor
Boosbeck
Boot
Booth Wood
Boothby Graffoe
Boothby Pagnell
Boothstown
Boothtown
Boothville
Bootle
Booton
Boquhan
Boraston
Borden
Bordley
Bordon
Boreham
Boreham Street
Borehamwood
Boreland
Boreraig
Borgh
Borghastan
Borgie
Borgue
Borley
Bornais
Borness
Borough
Borough Green
Boroughbridge
Borras Head
Borrowash
Borrowby
Borrowdale
Borrowfield
Borstal
Borth
Borth-y-Gest
Borthwick
Borthwickbrae
Borthwickshiels
Borve
Borwick
Bosavern
Bosbury
Boscastle
Boscombe
Boscoppa
Bosham
Bosherston
Bosley
Bossall
Bossiney
Bossingham
Bossington
Bostall Woods
Bostock Green
Boston
Boston Manor
Boston Spa
Boswinger
Botallack
Botany Bay
Botarua
Botcheston
Botesdale
Bothal
Bothamsall
Bothel
Bothenhampton
Bothwell
Botley
Botloe's Green
Botolph Claydon
Botolphs
Bottacks
Bottesford
Bottisham
Bottom Head
Bottomcraig
Botusfleming
Botwnnog
Bough Beech
Boughrood
Boughspring
Boughton
Boughton Aluph
Boughton Green
Boughton Lees
Boughton Malherbe
Boughton Street
Boulby
Bouldon
Boulmer
Boulston
Boultenstone
Boultham
Bounds Green
Bourn
Bournbrook
Bourne
Bourne End
Bournebridge
Bournemouth
Bournes Green
Bournheath
Bournmoor
Bournville
Bourton
Bourton on Dunsmore
Bourton-on-the-Hill
Bourton-on-the-Water
Bousd
Bouth
Bovain
Boveney
Boveridge
Boverton
Bovey Tracey
Bovingdon
Bovington Camp
Bow
Bow Brickhill
Bow Church
Bow of Fife
Bow Road
Bow Street
Bowbank
Bowburn
Bowcombe
Bowd
Bowden
Bowden Hill
Bowdon
Bower
Bower Hinton
Bowerchalke
Bowermadden
Bowers Gifford
Bowershall
Bowertower
Bowes
Bowes Park
Bowgreave
Bowland Bridge
Bowley
Bowlhead Green
Bowling
Bowling Bank
Bowlish
Bowmanstead
Bowmore
Bowness-on-Solway
Bowness-on-Windermere
Bowsden
Bowside Lodge
Bowthorpe
Bowtrees
Box
Box End
Boxbush
Boxford
Boxgrove
Boxley
Boxmoor
Boxted
Boxted Cross
Boxworth
Boxworth End
Boyden Gate
Boylestone
Boyndie
Boynton
Boysack
Boyton
Bozeat
Braaid
Braal Castle
Brabling Green
Brabourne
Brabourne Lees
Brabster
Bracadale
Braceborough
Bracebridge
Bracebridge Heath
Braceby
Bracewell
Brachla
Brackenber
Brackenfield
Brackens
Bracklamore
Brackletter
Brackley
Brackly
Bracknell, North
Bracknell, South
Braco
Bracobrae
Bracon Ash
Bracora
Bracorina
Bradbourne
Bradbury
Bradda
Bradden
Bradenham
Bradenstoke
Bradfield
Bradfield Combust
Bradfield Green
Bradfield Heath
Bradfield St Clare
Bradfield St George
Bradford
Bradford Abbas
Bradford Leigh
Bradford Peverell
Bradford-on-Avon
Bradford-on-Tone
Brading
Bradley
Bradley Green
Bradley in the Moors
Bradley Stoke
Bradmore
Bradninch
Bradnop
Bradpole
Bradshaw
Bradstone
Bradwall Green
Bradwell
Bradwell Waterside
Bradwell-on-Sea
Bradworthy
Brae
Braeantra
Braedownie
Braefoot
Braegrum
Braehead
Braehoulland
Braeleny
Braemar
Braemore
Braenaloin
Braes of Enzie
Braes of Foss
Braes of Ullapool
Braeswick
Braeval
Brafferton
Brafield-on-the-Green
Bragar
Bragbury End
Bragleenbeg
Braichmelyn
Braides
Braidwood
Braigo
Brailsford
Braintree
Braiseworth
Braishfield
Braithwaite
Braithwell
Bramber
Brambletye
Bramcote
Bramdean
Bramerton
Bramfield
Bramford
Bramhall
Bramham
Bramhope
Bramley
Bramling
Brampford Speke
Brampton
Brampton Abbotts
Brampton Ash
Brampton Bryan
Brampton en le Morthen
Bramshall
Bramshaw
Bramshill
Bramshott
Bramwell
Bran End
Branault
Brancaster
Brancepeth
Branchill
Brand Green
Branderburgh
Brandesburton
Brandeston
Brandis Corner
Brandiston
Brandon
Brandon Bank
Brandon Creek
Brandon Parva
Brandsby
Brandy Wharf
Brane
Branksome
Branksome Park
Bransby
Branscombe
Bransford
Bransford Bridge
Bransgore
Branson's Cross
Branston
Branston Booths
Branstone
Brant Broughton
Brantham
Branthwaite
Brantingham
Branton
Brantwood
Branxholm Bridgend
Branxholme
Branxton
Brassington
Brasted
Brasted Chart
Brathens
Bratoft
Brattleby
Bratton
Bratton Clovelly
Bratton Fleming
Bratton Seymour
Braughing
Braunston
Braunstone
Braunton
Brawby
Brawdy
Brawl
Brawlbin
Bray
Bray Shop
Bray Wick
Braybrooke
Brayford
Brayshaw
Brayton
Brazacott
Breachwood Green
Breacleit
Breadsall
Breadstone
Breage
Breakish
Breakon
Bream
Breamore
Brean
Breanais
Brearton
Breascleit
Breaston
Brechfa
Brechin
Brecklate
Breckles
Breckonside
Brecon
Bredbury
Brede
Bredenbury
Bredfield
Bredgar
Bredhurst
Bredicot
Bredon
Bredon's Hardwick
Bredon's Norton
Bredwardine
Breedon on the Hill
Breibhig
Breich
Breighton
Breinton
Bremhill
Brenachoille
Brenchley
Brendon
Brenkley
Brent
Brent Cross
Brent Eleigh
Brent Knoll
Brent Pelham
Brentford
Brentingby
Brentwood
Brenzett
Breoch
Brereton
Brereton Green
Brereton Heath
Bressingham
Bretabister
Bretby
Bretford
Bretforton
Bretherton
Brettenham
Bretton
Brewood
Briach
Briantspuddle
Bricket Wood
Bricklehampton
Bride
Bridekirk
Bridell
Bridestowe
Brideswell
Bridford
Bridge
Bridge End
Bridge Hewick
Bridge of Alford
Bridge of Allan
Bridge of Avon
Bridge of Balgie
Bridge of Bogendreip
Bridge of Brewlands
Bridge of Brown
Bridge of Cally
Bridge of Canny
Bridge of Craigisla
Bridge of Dee
Bridge of Don
Bridge of Dun
Bridge of Dye
Bridge of Earn
Bridge of Ericht
Bridge of Ess
Bridge of Feugh
Bridge of Forss
Bridge of Gairn
Bridge of Gaur
Bridge of Muchalls
Bridge of Orchy
Bridge of Tilt
Bridge of Tynet
Bridge of Walls
Bridge of Weir
Bridge Sollers
Bridge Street
Bridge Trafford
Bridgefoot
Bridgehampton
Bridgemary
Bridgemere
Bridgend
Bridgend of Lintrathen
Bridgerule
Bridges
Bridgetown
Bridgeyate
Bridgham
Bridgnorth
Bridgtown
Bridgwater
Bridlington
Bridport
Bridstow
Brierfield
Brierley
Brierley Hill
Brierton
Brig o'Turk
Brigehaugh
Brigg
Brigham
Brighouse
Brighstone
Brightgate
Brighthampton
Brightling
Brightlingsea
Brighton
Brightons
Brightwalton
Brightwell
Brightwell Baldwin
Brignall
Brigsley
Brigsteer
Brigstock
Brill
Brilley
Brimfield
Brimington
Brimington Common
Brimley
Brimpsfield
Brimpton
Brimstage
Brindister
Brindle
Brindley Ford
Brineton
Bringhurst
Brington
Brinian
Briningham
Brinkhill
Brinkley
Brinklow
Brinkworth
Brinmore
Brinscall
Brinsley
Brinsop
Brinsworth
Brinton
Brisco
Brisley
Brislington
Bristol
Bristol (PO Boxes)
Briston
Britannia
Britford
Brithdir
Brithem Bottom
Briton Ferry
Britwell Salome
Brixham
Brixton
Brixton Deverill
Brixworth
Brize Norton
Broad Blunsdon
Broad Campden
Broad Chalke
Broad Clyst
Broad Green
Broad Haven
Broad Heath
Broad Hill
Broad Hinton
Broad Laying
Broad Marston
Broad Oak
Broad Street
Broad Street Green
Broad Town
Broadbottom
Broadbridge
Broadbridge Heath
Broadford
Broadford Bridge
Broadgate
Broadgroves
Broadhaugh
Broadheath
Broadhembury
Broadhempston
Broadholme
Broadland Row
Broadlay
Broadley
Broadley Common
Broadmayne
Broadmeadows
Broadmere
Broadnymet
Broadoak
Broadrashes
Broadsea
Broadstairs
Broadstone
Broadstreet Common
Broadwas
Broadwater
Broadway
Broadwell
Broadwey
Broadwindsor
Broadwood Kelly
Broadwoodwidger
Brobury
Brochel
Brochloch
Brock
Brockbridge
Brockdish
Brockenhurst
Brockfield
Brockford Street
Brockhall
Brockham
Brockhampton
Brockholes
Brockhurst
Brocklebank
Brocklesby
Brockley
Brockley Green
Brockton
Brockweir
Brockwood Park
Brockworth
Brocton
Brodick
Brodsworth
Brogborough
Brogyntyn
Broken Cross
Brokenborough
Bromborough
Brome
Brome Street
Bromeswell
Bromfield
Bromham
Bromley
Bromley by Bow
Bromley Common
Bromley Green
Brompton
Brompton on Swale
Brompton Ralph
Brompton Regis
Brompton Road
Bromsash
Bromsberrow Heath
Bromsgrove
Bromstead Heath
Bromyard
Bromyard Downs
Bron-y-Gaer
Bronaber
Brondesbury
Brondesbury Park
Brongest
Bronington
Bronllys
Bronnant
Bronydd
Bronygarth
Brook
Brook Green
Brook Street
Brooke
Brookend
Brookhouse
Brookhouse Green
Brookland
Brooklands
Brookmans Park
Brooks
Brooks Green
Brooksby
Brookthorpe
Brookwood
Broom
Broom Hill
Broom of Dalreach
Broom's Green
Broome
Broome Wood
Broomedge
Broomer's Corner
Broomfield
Broomfleet
Broomhaugh
Broomhead
Broomhill
Brora
Broseley
Brothertoft
Brotherton
Brotton
Broubster
Brough
Brough Lodge
Brough Sowerby
Broughall
Brougham
Broughton
Broughton Astley
Broughton Beck
Broughton Gifford
Broughton Hackett
Broughton in Furness
Broughton Mills
Broughton Moor
Broughton Poggs
Broughtown
Broughty Ferry
Browland
Brown Candover
Brown Edge
Brown Lees
Brownhill
Brownhills
Brownieside
Brownlow Heath
Brownshill Green
Brownston
Broxa
Broxbourne
Broxburn
Broxholme
Broxted
Broxton
Broxwood
Bru
Bruachmary
Bruan
Bruera
Bruichladdich
Bruisyard
Bruisyard Street
Brund
Brundall
Brundish
Brundish Street
Bruntingthorpe
Bruntland
Brunton
Brushford
Brushford Barton
Bruton
Bryanston
Brydekirk
Brymbo
Bryn
Bryn Gates
Bryn-Coch
Bryn-henllan
Bryn-y-maen
Brynamman
Brynberian
Bryncae
Bryncethin
Bryncir
Bryncroes
Bryncrug
Bryneglwys
Brynford
Bryngwran
Bryngwyn
Brynhoffnant
Brynmawr
Brynmenyn
Brynna
Brynog
Brynrefail
Brynsadler
Brynsiencyn
Brynteg
Buaile nam Bodach
Bualintur
Bualnaluib
Bubbenhall
Bubwith
Buccleuch
Buchan
Buchanan Castle
Buchanhaven
Buchanty
Buchlyvie
Buck's Cross
Buck's Mills
Buckabank
Buckby Wharf
Buckden
Buckenham
Buckerell
Buckfast
Buckfastleigh
Buckhaven
Buckholm
Buckhorn Weston
Buckhurst Hill
Buckie
Buckies
Buckingham
Buckingham Palace
Buckland
Buckland Brewer
Buckland Common
Buckland Dinham
Buckland Filleigh
Buckland in the Moor
Buckland Monachorum
Buckland Newton
Buckland St Mary
Buckland-tout-Saints
Bucklebury
Bucklerheads
Bucklers Hard
Bucklesham
Buckley
Buckman Corner
Buckminster
Bucknall
Bucknell
Bucks Green
Bucks Hill
Bucks Horn Oak
Bucksburn
Buckspool
Buckton
Buckworth
Budbrooke
Budby
Buddon
Bude
Budlake
Budle
Budleigh Salterton
Budock Water
Buerton
Bugbrooke
Bugle
Bugthorpe
Buildwas
Builth Road
Builth Wells
Buirgh
Bulby
Buldoo
Bulford
Bulford Camp
Bulkeley
Bulkington
Bulkworthy
Bull Bay
Bull Green
Bull's Green
Bulley
Bullington
Bullpot Farm
Bullwood
Bulmer
Bulmer Tye
Bulphan
Bulverhythe
Bulwark
Bulwell
Bulwick
Bumble's Green
Bun Abhainn Eadarra
Bunarkaig
Bunbury
Bunchrew
Bundalloch
Buness
Bunessan
Bungay
Bunloit
Bunnahabhainn
Bunny
Buntait
Buntingford
Bunwell
Bunwell Street
Burbage
Burchett's Green
Burcombe
Burcot
Burcott
Burdale
Burdocks
Bures
Bures Green
Burford
Burgate
Burgess Hill
Burgh
Burgh by Sands
Burgh Castle
Burgh Heath
Burgh le Marsh
Burgh next Aylsham
Burgh on Bain
Burgh St Margaret
Burgh St Peter
Burgh-clere
Burghead
Burghfield
Burghfield Common
Burghfield Hill
Burghill
Burghwallis
Burham
Buriton
Burland
Burlawn
Burleigh
Burlescombe
Burleston
Burley
Burley Gate
Burley in Wharfdale
Burley Street
Burleydam
Burlingjobb
Burlow
Burlton
Burmarsh
Burmington
Burn
Burn Naze
Burn of Cambus
Burnage
Burnaston
Burnby
Burndell
Burnend
Burneside
Burness
Burneston
Burnett
Burnfoot
Burnham
Burnham Deepdale
Burnham Green
Burnham Market
Burnham Norton
Burnham Overy
Burnham Thorpe
Burnham-on-Crouch
Burnham-on-Sea
Burnhaven
Burnhead
Burnhervie
Burnhill Green
Burnhope
Burnhouse
Burniston
Burnley
Burnmouth
Burnopfield
Burnsall
Burnside
Burnside of Duntrune
Burnswark
Burnt Houses
Burnt Oak
Burnt Yates
Burntcliff Top
Burntisland
Burnton
Burntwood
Burntwood Green
Burpham
Burradon
Burrafirth
Burras
Burravoe
Burrells
Burrelton
Burridge
Burrill
Burringham
Burrington
Burrough End
Burrough Green
Burrough on the Hill
Burrow Bridge
Burrowhill
Burry Port
Burscough
Burscough Bridge
Bursea
Burshill
Bursledon
Burslem
Burstall
Burstock
Burston
Burstow
Burstwick
Burtersett
Burtle
Burton
Burton Agnes
Burton Bradstock
Burton Coggles
Burton Fleming
Burton Green
Burton Hastings
Burton in Lonsdale
Burton Joyce
Burton Latimer
Burton Lazars
Burton Leonard
Burton on the Wolds
Burton Overy
Burton Pedwardine
Burton Pidsea
Burton Salmon
Burton upon Stather
Burton upon Trent
Burton-in-Kendal
Burtonwood
Burwardsley
Burwarton
Burwash
Burwash Common
Burwash Weald
Burwell
Burwen
Burwick
Bury
Bury Green
Bury St Edmunds
Buryas Bridge
Burythorpe
Busbridge
Busby
Buscot
Bush Bank
Bush Crathie
Bush Green
Bushbury
Bushby
Bushey
Bushey Heath
Bushey Mead
Bushley
Bushton
Bushy Park
Bussage
Busta
Butcher's Cross
Butcher's Pasture
Butcombe
Buthill
Butleigh
Butleigh Wootton
Butler's Cross
Butler's Hill
Butlers Marston
Butley
Butsfield
Butt Green
Butt Lane
Buttercrambe
Butterleigh
Butterley
Buttermere
Butters Green
Buttershaw
Butterstone
Butterton
Butterwick
Buttington
Buttonoak
Buxhall
Buxted
Buxton
Buxton Heath
Buxworth
Bwlch
Bwlch Derwin
Bwlch-clawdd
Bwlch-llan
Bwlch-y-cibau
Bwlch-y-ddar
Bwlch-y-ffridd
Bwlch-y-groes
Bwlch-y-sarnau
Bwlchgwyn
Bwlchnewydd
Bwlchtocyn
Byers Green
Byfield
Byfleet
Byford
Bygrave
Byker
Bylane End
Bylchau
Byley
Bynea
Byrness
Bythorn
Byton
Byworth
Cabharstadh
Cabourne
Cabrach
Cackle Street
Cacrabank
Cadboll
Cadbury
Cadbury Barton
Cadbury Heath
Cadder
Cadderlie
Caddington
Caddletown
Caddonfoot
Cade Street
Cadeby
Cadeleigh
Cadgwith
Cadham
Cadishead
Cadle
Cadley
Cadmore End
Cadnam
Cadney
Cadole
Cadover Bridge
Cadoxton
Cae Ddafydd
Caeathro
Caehopkin
Caenby
Caenby Corner
Caeo
Caer Farchell
Caer Llan
Caer-Lan
Caerau
Caerdeon
Caergeiliog
Caergwrle
Caerhun
Caerleon
Caernarfon
Caerphilly
Caersws
Caerwent
Caerwys
Caethle
Caggan
Cairinis
Cairisiadar
Cairminis
Cairnargat
Cairnbaan
Cairnbeathie
Cairnbrogie
Cairnbulg
Cairncross
Cairncurran
Cairndoon
Cairndow
Cairne
Cairness
Cairney Lodge
Cairneyhill
Cairnhill
Cairnie
Cairnorrie
Cairnryan
Cairnsmore
Caister-on-Sea
Caistor
Caistor St Edmund
Caistron
Cake Street
Calanais
Calbost
Calbourne
Calcot
Calcott
Caldarvan
Caldbeck
Caldbergh
Caldecote
Caldecott
Calder Bridge
Calder Mains
Calder Vale
Calderbank
Calderbrook
Caldercruix
Calderglen
Caldermill
Caldhame
Caldicot
Caldwell
Caldy
Caledon
Caledonian Road
Caledrhydiau
Calfsound
Calgary
Califer
California
Calke
Callaly
Callander
Callerton Lane End
Callestick
Calligarry
Callington
Callisterhall
Callow
Callow End
Callow Hill
Callows Grave
Callyburn
Calmore
Calmsden
Calne
Calow
Calrossie
Calshot
Calstock
Calstone Wellington
Calthorpe
Calthwaite
Calton
Calveley
Calver
Calver Hill
Calverhall
Calverleigh
Calverley
Calvert
Calverton
Calvine
Calvo
Cam
Camasnacroise
Camasterach
Camastianavaig
Camault Muir
Camb
Camber
Camberley
Camberwell
Camblesforth
Cambo
Cambois
Camborne
Cambridge
Cambus
Cambus o'May
Cambusbarron
Cambuskenneth
Cambuslang
Cambusnethan
Camchuart
Camden
Camden Lock
Camden Town
Cameley
Camelford
Camelon
Camelsdale
Camer
Camer's Green
Cameron
Camerory
Camerton
Camghouran
Camis Eskan
Cammachmore
Cammeringham
Campbeltown
Camperdown
Camphouse
Campmuir
Camps End
Camps Heath
Campsall
Campsey Ash
Campton
Camptown
Camrose
Camsail
Camserney
Camstraddan
Camus Croise
Camus-luinie
Camusnagaul
Camusrory
Camusteel
Camusurich
Camusvrachan
Canada
Canary Wharf
Candacraig
Candlesby
Candy Mill
Cane End
Canewdon
Canford Bottom
Canford Cliffs
Canford Magna
Canisbay
Cann
Cann Common
Cannard's Grave
Cannich
Canning Town
Cannington
Cannock
Cannock Wood
Cannon Street
Cannop
Canon Bridge
Canon Frome
Canon Pyon
Canon's Town
Canonbie
Canonbury
Canons Ashby
Canterbury
Cantley
Cantlop
Canton
Cantray
Cantraydoune
Cantraywood
Cantsfield
Canvey Island
Canwell Hall
Canwick
Canworthy Water
Caol
Caolas
Caolas Scalpaigh
Caolasnacon
Capel
Capel Bangor
Capel Betws Lleucu
Capel Carmel
Capel Coch
Capel Curig
Capel Cynon
Capel Dewi
Capel Garmon
Capel Gwyn
Capel Gwynfe
Capel Hendre
Capel Isaac
Capel Iwan
Capel le Ferne
Capel Manor
Capel Parc
Capel Seion
Capel St Andrew
Capel St Mary
Capel St Silin
Capel Tygwydd
Capel-y-ffin
Capeluchaf
Capelulo
Capenhurst
Capernwray
Capheaton
Caplaw
Cappercleuch
Capplegill
Capstone
Capton
Caputh
Car Colston
Carbellow
Carbeth
Carbis Bay
Carbost
Carbrain
Carbrooke
Carburton
Carcary
Carclew
Carco
Carcroft
Cardenden
Cardeston
Cardiff
Cardigan
Cardington
Cardinham
Cardno
Cardoness
Cardow
Cardrona
Cardross
Cardurnock
Careby
Careston
Carew
Carew Cheriton
Carew Newton
Carey
Carfrae
Cargen
Cargenbridge
Cargill
Cargo
Cargo Fleet
Cargreen
Carham
Carhampton
Carharrack
Carie
Carines
Carisbrooke
Cark
Carkeel
Carland Cross
Carlby
Carlecotes
Carleton
Carleton Fishery
Carleton Forehoe
Carleton Rode
Carlin How
Carlingcott
Carlisle
Carlops
Carloway
Carlton
Carlton Colville
Carlton Curlieu
Carlton Husthwaite
Carlton in Cleveland
Carlton in Lindrick
Carlton Miniott
Carlton Scroop
Carlton-le-Moorland
Carlton-on-Trent
Carluke
Carlyon Bay
Carmacoup
Carmarthen
Carmel
Carmont
Carmore
Carmunnock
Carmyle
Carmyllie
Carn
Carn Brea
Carnaby
Carnach
Carnassarie
Carnbee
Carnbo
Carnduncan
Carne
Carnforth
Carnhell Green
Carnichal
Carnmore
Carno
Carnoch
Carnock
Carnon Downs
Carnousie
Carnoustie
Carnwath
Carnyorth
Carperby
Carr Shield
Carr Vale
Carradale
Carragrich
Carrbridge
Carreglefn
Carrick
Carriden
Carrine
Carrington
Carroch
Carrog
Carroglen
Carrol
Carron
Carron Bridge
Carronbridge
Carronshore
Carrot
Carrutherstown
Carruthmuir
Carrville
Carry
Carsaig
Carse
Carse of Ardesier
Carsegowan
Carseriggan
Carsethorn
Carsgoe
Carshalton
Carsington
Carsluith
Carsphairn
Carstairs
Carstairs Junction
Carswell Marsh
Carter's Clay
Carterton
Carterway Heads
Carthew
Carthorpe
Cartington
Cartmel
Cartmel Fell
Carway
Cascob
Cashel
Cashlie
Cashmoor
Cassencarie
Cassington
Cassop
Castel
Castell Howell
Castell-y-bwch
Castellau
Casterton
Castle Acre
Castle Ashby
Castle Bank
Castle Bolton
Castle Bromwich
Castle Bytham
Castle Caereinion
Castle Camps
Castle Carrock
Castle Cary
Castle Combe
Castle Donington
Castle Douglas
Castle Eaton
Castle Eden
Castle End
Castle Frome
Castle Gresley
Castle Heaton
Castle Hedingham
Castle Hill
Castle Kennedy
Castle Levan
Castle Madoc
Castle Morris
Castle O'er
Castle Rising
Castle Stuart
Castlebay
Castlebythe
Castlecary
Castlecraig
Castlefairn
Castleford
Castlemartin
Castlemilk
Castlemorton
Castlenau
Castleside
Castlethorpe
Castleton
Castletown
Castleweary
Castlewigg
Caston
Castor
Cat and Fiddle Inn
Catbrain
Catchall
Catcleugh
Catcliffe
Catcott
Caterham
Catesby
Catfield
Catfirth
Catford
Catforth
Cathedine
Catherington
Catherton
Catlow
Catlowdy
Catmore
Caton
Cator Court
Catrine
Catsfield
Catshill
Cattadale
Cattal
Cattawade
Catterall
Catterick
Catterick Camp
Catterlen
Catterline
Catterton
Catthorpe
Cattistock
Catton
Catton Hall
Catwick
Catworth
Caudworthy
Caulcott
Cauldcots
Cauldhame
Cauldon
Cauldside
Caulkerbush
Caundle Marsh
Caunsall
Caunton
Causeway End
Causewayhead
Causey Park
Causeyend
Cautley
Cavendish
Cavenham
Cavens
Caversfield
Caversham
Caverswall
Cawdor
Cawkwell
Cawood
Cawsand
Cawston
Cawthorne
Cawthorpe
Cawton
Caxton
Caxton Gibbet
Caynham
Caythorpe
Cayton
Ceallan
Ceann a'Bhaigh
Ceann Loch Shiphoirt
Cearsiadar
Ceathramh Meadhanach
Cedig
Cefn Cantref
Cefn Coch
Cefn Cribwr
Cefn Cross
Cefn Einion
Cefn Hengoed
Cefn-brith
Cefn-caer-Ferch
Cefn-coch
Cefn-coed-y-cymmer
Cefn-ddwysarn
Cefn-gorwydd
Cefn-gwyn
Cefn-mawr
Cefn-y-bedd
Cefn-y-pant
Cefndeuddwr
Cefneithin
Ceidio
Ceidio Fawr
Ceint
Cellan
Cellardyke
Cellarhead
Cemaes
Cemmaes
Cenarth
Cennin
Ceos
Ceres
Cerne Abbas
Cerney Wick
Cerrigceinwen
Cerrigydrudion
Cessford
Chaceley
Chacewater
Chackmore
Chacombe
Chad Valley
Chadderton
Chaddesden
Chaddesley Corbett
Chaddleworth
Chadlington
Chadshunt
Chadwell
Chadwell St Mary
Chadwick End
Chaffcombe
Chagford
Chailey
Chainhurst
Chalbury Common
Chaldon
Chaldon Herring
Chale
Chale Green
Chalfont Common
Chalfont St Giles
Chalfont St Peter
Chalford
Chalgrove
Chalk
Chalk Farm
Challacombe
Challoch
Challock
Chalmington
Chalton
Chalvington
Champany
Chancery Lane
Chandler's Cross
Chandler's Ford
Channerwick
Chantry
Chapel
Chapel Allerton
Chapel Amble
Chapel Brampton
Chapel Chorlton
Chapel Cross
Chapel End
Chapel Fields
Chapel Haddlesey
Chapel Hill
Chapel Lawn
Chapel of Garioch
Chapel Rossan
Chapel Row
Chapel St Leonards
Chapel Stile
Chapel Town
Chapel-en-le-Frith
Chapel-le-Dale
Chapelbank
Chapeldonan
Chapelgate
Chapelhall
Chapelhill
Chapelknowe
Chapelton
Chapeltown
Chapman's Well
Chapmanslade
Chapmore End
Chappel
Chard
Chard Junction
Chardstock
Charfield
Charing
Charing Cross
Charingworth
Charlbury
Charlcombe
Charlcutt
Charlecote
Charles Tye
Charlesfield
Charleshill
Charleston
Charlestown
Charlestown of Aberlour
Charlesworth
Charlinch
Charlton
Charlton Abbots
Charlton Adam
Charlton Horethorne
Charlton Kings
Charlton Mackrell
Charlton Marshall
Charlton Musgrove
Charlton-All-Saints
Charlton-on-Otmoor
Charlwood
Charminster
Charmouth
Charndon
Charney Bassett
Charnock Richard
Charsfield
Chart Corner
Chart Sutton
Charter Alley
Charterhouse
Charterville Allotments
Chartham
Chartham Hatch
Chartridge
Charwelton
Chase End Street
Chase Terrace
Chasetown
Chastleton
Chasty
Chatburn
Chatcull
Chatham
Chathill
Chattenden
Chatteris
Chattisham
Chatto
Chatton
Chawleigh
Chawley
Chawston
Chawton
Cheadle
Cheadle Hulme
Cheam
Cheapside
Chearsley
Chebsey
Checkendon
Checkley
Chedburgh
Cheddar
Cheddington
Cheddleton
Cheddon Fitzpaine
Chedglow
Chedgrave
Chedington
Chediston
Chedworth
Chedzoy
Cheeklaw
Cheesden
Cheeseman's Green
Cheetham Hill
Cheldon
Chelford
Chellaston
Chelmarsh
Chelmondiston
Chelmorton
Chelmsford
Chelsea
Chelsea Embankment
Chelsfield
Chelsham
Chelsworth
Cheltenham
Chelveston
Chelvey
Chelwood
Chelwood Gate
Chelworth
Cheney Longville
Chenies
Chepstow
Cherhill
Cherington
Cheriton
Cheriton Bishop
Cheriton Cross
Cheriton Fitzpaine
Cherrington
Cherry Burton
Cherry Hinton
Cherry Willingham
Chertsey
Cheselbourne
Chesham
Chesham Bois
Cheshunt
Cheslyn Hay
Chessington
Chester
Chester-le-Street
Chesterblade
Chesterfield
Chesters
Chesterton
Chesterton Green
Chestfield
Cheswardine
Cheswick
Chetnole
Chettiscombe
Chettisham
Chettle
Chetton
Chetwode
Chetwynd Aston
Cheveley
Chevening
Cheverell's Green
Chevington
Chevington Drift
Chevithorne
Chew Magna
Chew Stoke
Chewton Keynsham
Chewton Mendip
Cheyne Walk
Chicheley
Chichester
Chickerell
Chickering
Chicklade
Chickney
Chicksands
Chidden
Chiddingfold
Chiddingly
Chiddingstone
Chiddingstone Causeway
Chiddingstone Hoath
Chideock
Chidham
Chieveley
Chignall Smealy
Chignall St James
Chigwell
Chigwell Row
Chilbolton
Chilcomb
Chilcombe
Chilcompton
Chilcote
Child Okeford
Child's Ercall
Childer Thornton
Childerditch
Childrey
Childs Hill
Childswickham
Childwall
Childwick Green
Chilfrome
Chilgrove
Chilham
Chillaton
Chillenden
Chillerton
Chillesford
Chillingham
Chillington
Chilmark
Chilson
Chilsworthy
Chilthorne Domer
Chilton
Chilton Candover
Chilton Cantelo
Chilton Foliat
Chilton Polden
Chilton Street
Chilton Trinity
Chilvers Coton
Chilworth
Chimney
Chineham
Chingford
Chingford Green
Chingford Hatch
Chinley
Chinley Head
Chinnor
Chipchase Castle
Chipley Park
Chipnall
Chippenham
Chipperfield
Chipping
Chipping Campden
Chipping Hill
Chipping Norton
Chipping Ongar
Chipping Sodbury
Chipping Warden
Chipstable
Chipstead
Chirbury
Chirk
Chirmorrie
Chirnside
Chirnsidebridge
Chirton
Chisbury
Chiscan
Chiselborough
Chiseldon
Chislehampton
Chislehurst
Chislehurst Caves
Chislet
Chiswell Green
Chiswick
Chiswick High Road
Chiswick House
Chiswick Park
Chisworth
Chithurst
Chittering
Chitterne
Chittlehamholt
Chittlehampton
Chittoe
Chivelstone
Chobham
Choicelee
Cholderton
Cholesbury
Chollerton
Cholsey
Cholstrey
Cholwell
Chop Gate
Choppington
Chopwell
Chorley
Chorleywood
Chorlton
Chorlton Lane
Chorlton-cum-Hardy
Chowley
Chrishall
Chrishall Grange
Chrisswell
Christchurch
Christian Malford
Christleton
Christmas Common
Christon
Christon Bank
Christow
Chryston
Chudleigh
Chudleigh Knighton
Chulmleigh
Chunal
Church
Church Aston
Church Brampton
Church Broughton
Church Common
Church Crookham
Church Eaton
Church End
Church Enstone
Church Fenton
Church Green
Church Gresley
Church Hanborough
Church Houses
Church Knowle
Church Langley
Church Langton
Church Lawford
Church Lawton
Church Leigh
Church Lench
Church Minshull
Church Norton
Church Preen
Church Pulverbatch
Church Stoke
Church Stowe
Church Street
Church Stretton
Church Village
Church Warsop
Churcham
Churchdown
Churchend
Churchgate
Churchgate Street
Churchill
Churchingford
Churchover
Churchstanton
Churchstow
Churchthorpe
Churchtown
Churston Ferrers
Churt
Churton
Churwell
Chute Cadley
Chute Standen
Chwilog
Chyandour
Cilan Uchaf
Cilcain
Cilcennin
Cilfrew
Cilgerran
Cilgwyn
Ciliau-Aeron
Cille Bhrighde
Cille Pheadair
Cilmery
Cilrhedyn
Ciltalgarth
Cilwendeg
Cilybebyll
Cilycwm
Cinderford
Cirbhig
Cirencester
City Dulas
City of Westminster
Clabhach
Clachaig
Clachan
Clachan of Campsie
Clachan of Glendaruel
Clachan-Seil
Clachandhu
Clachaneasy
Clachanmore
Clachanturn
Clachnabrain
Clachnaharry
Clachtoll
Clackmannan
Clacton-on-Sea
Cladach a'Chaolais
Cladach Chircebost
Cladich
Claggan
Claigan
Claines
Clandown
Clanfield
Clannaborough Barton
Clanville
Claonaig
Claonairigh
Claonel
Clap Gate
Clapgate
Clapham
Clapham Common
Clapham Hill
Clapham Junction
Clapham North
Clapham South
Clappers
Clappersgate
Clapton
Clapton Park
Clapton-in-Gordano
Clapton-on-the-Hill
Clapworthy
Clarbeston
Clarbeston Road
Clarborough
Clardon
Clare
Clarebrand
Clarencefield
Clareton
Clarilaw
Clarkston
Clashban
Clashcoig
Clashgour
Clashindarroch
Clashmore
Clashnessie
Clashnoir
Clathy
Clatt
Clatter
Clatterford End
Clatterin Brig
Clatteringshaws
Clatworthy
Claughton
Claverdon
Claverham
Clavering
Claverley
Claverton
Clawdd-newydd
Clawfin
Clawthorpe
Clawton
Claxby
Claxby Pluckacre
Claxton
Clay Common
Clay Coton
Clay Cross
Clay of Allan
Claybrooke Magna
Claybrooke Parva
Claydene
Claydon
Claygate
Claygate Cross
Clayhanger
Clayhidon
Clayock
Claypole
Claythorpe
Clayton
Clayton West
Clayton-le-Moors
Clayton-le-Woods
Clayworth
Cleadale
Cleadon
Clearbrook
Clearwell
Cleasby
Cleat
Cleatlam
Cleatop
Cleator
Cleator Moor
Cleckheaton
Clee St Margaret
Cleedownton
Cleehill
Cleethorpes
Cleeton St Mary
Cleeve
Cleeve Hill
Cleeve Prior
Cleghorn
Clehonger
Cleigh
Cleish
Cleland
Clench Common
Clenchwarton
Clent
Cleobury Mortimer
Cleobury North
Clephanton
Clerkenwell
Clerklands
Clestrain
Cleuch Head
Cleuchbrae
Clevancy
Clevedon
Cleveland Tontine
Cleveleys
Clevelode
Cleverton
Clewer
Clewer Village
Cley next the Sea
Cliburn
Cliddesden
Cliff
Cliff End
Cliffe
Cliffe Woods
Clifford
Clifford Chambers
Clifford's Mesne
Cliffs End
Clifton
Clifton Campville
Clifton Hampden
Clifton Reynes
Clifton upon Dunsmore
Clifton upon Teme
Cliftonville
Clifynydd
Climping
Climpy
Clint
Clint Green
Clinterty
Clintmains
Clippesby
Clipsham
Clipston
Clipston-on-the-Wolds
Clipstone
Clitheroe
Clive
Clivocast
Clocaenog
Clochan
Clochtow
Clock Face
Clockhill
Cloddach
Clodock
Cloford
Cloichran
Clola
Clonrae
Clophill
Clopton
Clopton Green
Close Clark
Closeburn
Closworth
Clothall
Clothan
Clotton
Clough
Clough Foot
Cloughton
Cloughton Newlands
Clounlaid
Clousta
Clouston
Clova
Clovelly
Clovelly Cross
Clovenfords
Clovenstone
Cloverhill
Cloves
Clovullin
Clowne
Clows Top
Cloyntie
Cluanach
Clubworthy
Cluer
Clun
Clunas
Clunbury
Clune
Clunes
Clungunford
Clunie
Clunton
Cluny
Clutton
Clwt-y-bont
Clydach
Clydach Vale
Clydebank
Clydey
Clyffe Pypard
Clynder
Clynderwen
Clynelish
Clynnog-fawr
Clyro
Clyst Honiton
Clyst Hydon
Clyst St George
Clyst St Lawrence
Clyst St Mary
Cnewr
Cnoc
Cnoc nan Sltheag
Cnwch Coch
Coachford
Coad's Green
Coal Aston
Coalbrookdale
Coalbrookvale
Coalburn
Coalburns
Coalcleugh
Coaley
Coalpit Heath
Coalpit Hill
Coalport
Coalsnaughton
Coaltown of Balgonie
Coaltown of Wemyss
Coalville
Coat
Coatbridge
Coate
Coates
Coatham
Coatham Mundeville
Cobairdy
Cobbaton
Coberley
Cobham
Cobleland
Cobler's Green
Cobnash
Coburty
Cochno
Cock Alley
Cock Bridge
Cock Clarks
Cockayne
Cockayne Hatley
Cockburnspath
Cockenzie and Port Seton
Cockerham
Cockermouth
Cockernhoe
Cockett
Cockfield
Cockfosters
Cocking
Cockington
Cocklake
Cockley Beck
Cockley Cley
Cockpole Green
Cockshutt
Cockthorpe
Cockwood
Codda
Coddenham
Coddington
Codford St Mary
Codford St Peter
Codicote
Codmore Hill
Codnor
Codrington
Codsall
Codsall Wood
Coed Morgan
Coed Ystumgwern
Coed-y-paen
Coed-yr-ynys
Coedcae
Coedely
Coedkernew
Coedpoeth
Coelbren
Coffinswell
Cofton Hackett
Cogan
Cogenhoe
Coggeshall
Coggeshall Hamlet
Coggins Mill
Coig Peighinnean
Coilantogle
Coilesan
Coillaig
Coille Mhorgil
Coille-righ
Coillore
Coity
Col
Colaboll
Colan
Colaton Raleigh
Colbost
Colbury
Colby
Colchester
Colcot
Cold Ash
Cold Ashby
Cold Ashton
Cold Aston
Cold Blow
Cold Brayfield
Cold Chapel
Cold Hanworth
Cold Hesledon
Cold Higham
Cold Kirby
Cold Newton
Cold Norton
Cold Overton
Coldbackie
Coldblow
Coldean
Coldeast
Colden Common
Coldfair Green
Coldham
Coldharbour
Coldharbour Lane
Coldingham
Coldrain
Coldred
Coldrey
Coldridge
Coldrife
Coldstream
Coldwaltham
Coldwells
Cole
Cole Green
Cole's Cross
Colebatch
Colebrook
Colebrooke
Coleby
Coleford
Colehill
Coleman's Hatch
Colemere
Colenden
Coleorton
Colerne
Colesbourne
Colesden
Coleshill
Colestocks
Colfin
Colgate
Colgrain
Colindale
Colinsburgh
Colinton
Colintraive
Colkirk
Collace
Collafirth
Collaton St Mary
Collessie
Colleton Mills
Collett's Green
Collier Row
Collier Street
Collier's End
Colliers Wood
Colliery Row
Collieston
Collin
Collingbourne Ducis
Collingbourne Kingston
Collingham
Collington
Collingtree
Collins Green
Colliston
Colliton
Collmuir
Collycroft
Collynie
Collyweston
Colmonell
Colmworth
Coln Rogers
Coln St Aldwyns
Coln St Dennis
Coln-brook
Colnabaichin
Colne
Colne Engaine
Colney
Colney Hatch
Colney Heath
Colney Street
Colonsay
Colpy
Colquhar
Colsterdale
Colsterworth
Colston Bassett
Coltfield
Coltishall
Colton
Colva
Colvend
Colvister
Colwall Green
Colwall Stone
Colwell
Colwich
Colwick
Colwinston
Colworth
Colwyn Bay
Colyford
Colyton
Combe
Combe Down
Combe Florey
Combe Hay
Combe Martin
Combe Moor
Combe Raleigh
Combe St Nicholas
Combeinteignhead
Comberbach
Comberford
Comberton
Combpyne
Combrook
Combs
Combs Ford
Combwich
Comer
Comers
Commercial End
Commercial Road
Commins Coch
Common Edge
Common Moor
Common Side
Commondale
Compstall
Compton
Compton Abbas
Compton Abdale
Compton Bassett
Compton Beauchamp
Compton Bishop
Compton Chamberlayne
Compton Dando
Compton Dundon
Compton Martin
Compton Pauncefoot
Compton Valence
Comra
Comrie
Conchra
Concraigie
Conder Green
Conderton
Condicote
Condorrat
Condover
Coney Weston
Coneyhurst Common
Coneysthorpe
Coneythorpe
Conford
Congash
Congdon's Shop
Congerstone
Congham
Congleton
Congres-bury
Conicavel
Coningsby
Conington
Conisbrough
Conisby
Conisholme
Coniston
Coniston Cold
Conistone
Conland
Connah's Quay
Connel
Connel Park
Connor Downs
Conon Bridge
Cononish
Cononley
Cononsyth
Consall
Consett
Constable Burton
Constantine
Contin
Contlaw
Contullich
Conwy
Conyer
Cooden
Coodham
Cookbury
Cookham
Cookham Dean
Cookham Rise
Cookhill
Cookley
Cookley Green
Cookney
Cooksbridge
Cookshill
Cooksmill Green
Cookston
Coolham
Cooling
Coombe
Coombe Bissett
Coombe Hill
Coombe Keynes
Coombes
Cooper's Corner
Cooper's Hill
Coopersale Common
Cootham
Cop Street
Copdock
Copford Green
Copgrove
Copister
Cople
Copley
Coplow Dale
Copmanthorpe
Coppathorne
Coppenhall
Coppenhall Moss
Coppingford
Coppleridge
Copplestone
Coppull
Coppull Moor
Copsale
Copse Hill
Copster Green
Copston Magna
Copt Heath
Copt Hewick
Copt Oak
Copthall
Copthorne
Copy Lake
Copythorne
Coralhill
Corbiegoe
Corbridge
Corby
Corby Glen
Cordach
Coreley
Corfe
Corfe Castle
Corfe Mullen
Corfton
Corgarff
Corhampton
Corley
Corley Ash
Corley Moor
Cornabus
Corney
Cornforth
Cornhill
Cornhill-on-Tweed
Cornholme
Cornish Hall End
Cornquoy
Cornsay
Cornsay Colliery
Corntown
Cornwell
Cornwood
Cornworthy
Corpach
Corpusty
Corrachree
Corran
Corranbuie
Corranmore
Corrany
Corrie
Corrie Common
Corriechrevie
Corriecravie
Corriedoo
Corrielorne
Corrievorrie
Corrimony
Corringham
Corris
Corris Uchaf
Corrour Shooting Lodge
Corrow
Corry
Corrychurrachan
Corrykinloch
Corrylach
Corrymuckloch
Corsback
Corscombe
Corse
Corse Lawn
Corse of Kinnoir
Corsebank
Corsehill
Corsemalzie
Corsewall
Corsham
Corsindae
Corsley
Corsley Heath
Corsock
Corston
Corstorphine
Cortachy
Corton
Corton Denham
Coruna
Corwen
Coryton
Cosby
Coseley
Cosford
Cosgrove
Cosham
Cosheston
Coshieville
Cossall
Cossington
Costa
Costessey
Costock
Coston
Cot-town
Cote
Cotebrook
Cotehill
Cotes
Cotesbach
Cotgrave
Cothall
Cotham
Cothelstone
Cotheridge
Cotherstone
Cothill
Cotleigh
Coton
Coton Clanford
Coton in the Clay
Coton in the Elms
Cottam
Cottartown
Cottenham
Cottenham Park
Cotterdale
Cottered
Cotteridge
Cotterstock
Cottesbrooke
Cottesmore
Cottingham
Cottisford
Cotton
Cotton End
Cottown
Cotwalton
Couch's Mill
Coughton
Cougie
Coulaghailtro
Coulags
Coull
Coulport
Coulsdon
Coulston
Coulter
Coultershaw Bridge
Coultings
Coulton
Coultra
Cound
Coundon
Coundon Grange
Countersett
Countes-thorpe
Countess
Countess Wear
Countisbury
County Oak
Coupar Angus
Coupland
Cour
Court Barton
Court Henry
Court House Green
Court-at-Street
Courteenhall
Courtsend
Courtway
Cousland
Cousley Wood
Coustonn
Cove
Cove Bay
Covehithe
Coven
Coveney
Covenham St Bartholomew
Covenham St Mary
Covent Garden
Coventry
Coverack
Coverham
Covesea
Covington
Cowan Bridge
Cowbeech
Cowbit
Cowbridge
Cowden
Cowden Pound
Cowdenbeath
Cowes
Cowesby
Cowfold
Cowgill
Cowie
Cowlam Manor
Cowley
Cowling
Cowlinge
Cowmes
Cowpen
Cowpen Bewley
Cowplain
Cowshill
Cowthorpe
Cox Common
Coxbank
Coxbench
Coxford
Coxheath
Coxhoe
Coxley
Coxtie Green
Coxwold
Coychurch
Coylet
Coylton
Coylumbridge
Coynach
Coynachie
Coytrahen
Crabbet Park
Crabbs Cross
Crabtree
Crackaig
Crackenthorpe
Crackington
Crackington Haven
Crackleybank
Crackpot
Cracoe
Craddock
Cradhlastadh
Cradley
Crafthole
Cragg
Craggan
Cragganruar
Craggie
Craghead
Craibstone
Craichie
Craig Penllyn
Craig-y-nos
Craigandaive
Craigans
Craigbeg
Craigcefnparc
Craigcleuch
Craigculter
Craigdallie
Craigdam
Craigdarroch
Craigdhu
Craigearn
Craigellachie
Craigellie
Craigencallie
Craigend
Craigendoran
Craigengillan
Craigenputtock
Craigens
Craigglass
Craighall
Craighat
Craighead
Craighlaw
Craighouse
Craigie
Craigie Brae
Craigieholm
Craiglockhart
Craiglug
Craigmaud
Craigmillar
Craigmore
Craigmyle Ho.
Craignafeich
Craignant
Craignavie
Craigneil
Craignure
Craigo
Craigoch
Craigow
Craigrothie
Craigroy
Craigroy Farm
Craigruie
Craigsanquhar
Craigton
Craigtown
Craik
Crail
Crailing
Crailinghall
Craiselound
Crakehill
Crambe
Cramlington
Cramond
Cranage
Cranberry
Cranborne
Cranbourne
Cranbrook
Cranbrook Common
Cranfield
Cranford
Cranford St Andrew
Cranford St John
Cranham
Crank
Cranleigh
Cranley Gardens
Cranmer Green
Cranmore
Cranna
Crannach
Cranoe
Cransford
Cranshaws
Cranstal
Crantock
Cranwell
Cranwich
Cranworth
Craobh Haven
Crapstone
Crarae
Crask Inn
Crask of Aigas
Craskins
Craster
Craswall
Cratfield
Crathes
Crathie
Crathorne
Craven Arms
Craw
Crawcrook
Crawford
Crawfordjohn
Crawfordton
Crawick
Crawley
Crawley Down
Crawleyside
Crawshawbooth
Crawton
Crawyn
Cray
Cray's Pond
Crayford
Crayke
Crays Hill
Crazies Hill
Creacombe
Creag Ghoraidh
Creaton
Creca
Credenhill
Crediton
Creech St Michael
Creed
Creedy Park
Creekmouth
Creeting St Mary
Creeton
Creetown
Creggans
Cregneish
Cregrina
Creich
Creigiau
Crelevan
Cremyll
Cressage
Cresselly
Cressing
Cresswell
Creswell
Cretingham
Cretshengan
Crewe
Crewgreen
Crewkerne
Crewton
Crianlarich
Cribyn
Criccieth
Crich
Crich Carr
Crichie
Crichton
Crick
Crickadarn
Cricket Malherbie
Cricket St Thomas
Crickheath
Crickhowell
Cricklade
Cricklewood
Cridling Stubbs
Crieff
Criggion
Crigglestone
Crimdon Park
Crimond
Crimonmogate
Crimplesham
Crinan
Cringleford
Cringletie
Crinow
Cripp's Corner
Cripplesease
Crix
Croalchapel
Croasdale
Crock Street
Crockenhill
Crockernwell
Crockerton
Crocketford
Crockey Hill
Crockham Hill
Crockhurst Street
Crockleford Heath
Croes Hywel
Croes y pant
Croes-Ian
Croes-y-mwyalch
Croesau Bach
Croeserw
Croesgoch
Croesor
Croespenmaen
Croesyceiliog
Croft
Croft-on-Tees
Crofthead
Crofton
Crofton Park
Crofts
Crofts of Benachielt
Crofts of Buinach
Crofts of Haddo
Crofty
Crogen
Croggan
Croglin
Croick
Croig
Crois Dughaill
Croit e Caley
Cromarty
Crombie Mill
Cromblet
Cromdale
Cromer
Cromer Hyde
Cromford
Cromhall
Cromhall Common
Crompton Fold
Cromwell
Cromwell Road
Cronberry
Crondall
Cronk-y-Voddy
Cronton
Crook
Crook of Devon
Crookedholm
Crookham
Crookham Village
Crooklands
Cropredy
Cropston
Cropthorne
Cropton
Cropwell Bishop
Cropwell Butler
Cros
Crosbie
Crosbost
Crosby
Crosby Garrett
Crosby Ravensworth
Croscombe
Cross Ash
Cross Bush
Cross Gates
Cross Green
Cross Hands
Cross Hill
Cross Hills
Cross Houses
Cross in Hand
Cross Inn
Cross Keys
Cross Lane Head
Cross Lanes
Cross o' the Hands
Cross of Jackson
Cross Street
Cross-at-Hand
Crossaig
Crossapoll
Crosscanonby
Crossdale Street
Crossens
Crossford
Crossgate
Crossgatehall
Crossgates
Crossgill
Crosshands
Crosshill
Crosshouse
Crosskeys
Crosskirk
Crosslanes
Crosslee
Crosslet
Crossmichael
Crossmoor
Crossroads
Crossway
Crossway Green
Crossways
Crosswell
Crosthwaite
Croston
Crostwick
Crostwight
Crouch
Crouch End
Crouch Hill
Croughton
Crovie
Crow
Crow Hill
Crowan
Crowborough
Crowcombe
Crowdecote
Crowdhill
Crowfield
Crowhurst
Crowland
Crowlas
Crowle
Crowle Green
Crowmarsh Gifford
Crownhill
Crownthorpe
Crowntown
Crows-an-wra
Crowthorne
Crowton
Croxall
Croxdale
Croxden
Croxley Green
Croxton
Croxton Green
Croxton Kerrial
Croxtonbank
Croy
Croyde
Croydon
Cruach
Cruchie
Cruckmeole
Cruckton
Cruden Bay
Crudgington
Crudwell
Crug
Crugmeer
Crugybar
Crulabhig
Crumlin
Crundale
Crutherland
Cruwys Morchard
Crux Easton
Crwbin
Cryers Hill
Crymlyn
Crymych
Crynant
Crystal Palace
Cuaig
Cubbington
Cubert
Cubitt Town
Cublington
Cuckfield
Cucklington
Cuckney
Cuckoo's Nest
Cuddesdon
Cuddington
Cuddington Heath
Cuddy Hill
Cudham
Cudliptown
Cudworth
Cuffley
Cuidhaseadair
Cuidhir
Cuidhtinis
Cuidrach
Cuilmuich
Culag
Culbo
Culbokie
Culbone
Culburnie
Culcabock
Culcharry
Culcheth
Culdrain
Culduie
Culford
Culgaith
Culgower
Culham
Culindrach
Culkein
Culkerton
Cullachie
Cullen
Cullercoats
Cullicudden
Culligran
Cullingworth
Cullipool
Cullivoe
Culloch
Culloden
Cullompton
Culmaily
Culmington
Culmstock
Culnacraig
Culnadalloch
Culnaknock
Culnamean
Culpho
Culquhirk
Culrain
Culross
Culroy
Culsh
Culshabbin
Culswick
Cultercullen
Cults
Cultybraggan Camp
Culverstone Green
Culverthorpe
Culvie
Culworth
Cumberhead
Cumbernauld
Cumberworth
Cuminestown
Cumloden
Cummersdale
Cummertrees
Cummingstown
Cumnock
Cumnor
Cumrew
Cumrue
Cumstoun
Cumwhinton
Cumwhitton
Cundall
Cunninghamhead
Cunningsburgh
Cunnister
Cunnoquhie
Cupar
Cupar Muir
Curbar
Curbridge
Curdridge
Curdworth
Curland
Curload
Curridge
Currie
Curry Mallet
Curry Rivel
Curteis' Corner
Curtisden Green
Cury
Cushnie
Cushuish
Cusop
Custom House
Cutcloy
Cutcombe
Cuthill
Cutiau
Cutnall Green
Cutsdean
Cutthorpe
Cutts
Cuttyhill
Cuxham
Cuxton
Cuxwold
Cwm
Cwm Ffrwd-oer
Cwm Irfon
Cwm Owen
Cwm-bach
Cwm-Cewydd
Cwm-Llinau
Cwm-Morgan
Cwm-parc
Cwm-twrch Isaf
Cwm-y-glo
Cwmafan
Cwmaman
Cwmann
Cwmbach
Cwmbelan
Cwmbran
Cwmbrwyno
Cwmcarn
Cwmcarvan
Cwmcoy
Cwmdare
Cwmdu
Cwmduad
Cwmfelin Boeth
Cwmfelin Mynach
Cwmfelinfach
Cwmffrwd
Cwmgiedd
Cwmgors
Cwmgwrach
Cwmisfael
Cwmllyfri
Cwmllynfell
Cwmpengraig
Cwmsychbant
Cwmsymlog
Cwmtillery
Cwmyoy
Cwmystwyth
Cwrt
Cwrt-newydd
Cwrt-y-gollen
Cyffylliog
Cymmer
Cynghordy
Cynheidre
Cynwyd
Cynwyl Elfed
Cyprus
Dabton
Daccombe
Dacre
Dacre Banks
Daddry Shield
Dadford
Dadlington
Dafen
Daffy Green
Dagenham
Daggons
Daglingworth
Dagnall
Dail Beag
Dail Bho Dheas
Dail Bho Thuath
Dail Mor
Dailly
Dairsie
Dalabrog
Dalavich
Dalballoch
Dalbeattie
Dalblair
Dalbreck
Dalbury
Dalby
Dalcairnie
Dalchalloch
Dalchalm
Dalchenna
Dalchirach
Dalchork
Dalchreichart
Dalchruin
Dalcross
Dalderby
Daldownie
Dale
Dale of Walls
Dale Park
Dalehouse
Dalelia
Daless
Dalestie
Dalfad
Dalganachan
Dalgarven
Dalgety Bay
Dalgig
Dalginross
Dalgonar
Dalguise
Dalhalvaig
Dalham
Daligan
Dalivaddy
Daljarrock
Dalkeith
Dallas
Dallaschyle
Dallash
Dallinghoo
Dallington
Dalmadilly
Dalmally
Dalmarnock
Dalmary
Dalmellington
Dalmeny
Dalmichy
Dalmore
Dalmunzie Hotel
Dalnabreck
Dalnacarn
Dalnaglar Castle
Dalnahaitnach
Dalnamain
Dalnavie
Dalness
Dalnessie
Dalqueich
Dalreoch
Dalroy
Dalrulzian
Dalry
Dalrymple
Dalserf
Dalshangan
Dalskairth
Dalston
Dalston Junction
Dalswinton
Daltomach
Dalton
Dalton Piercy
Dalton-in-Furness
Dalton-le-Dale
Dalton-on-Tees
Daltot
Daltra
Dalveich
Dalvennan
Dalvourn
Dalwhinnie
Dalwood
Damerham
Damgate
Damnaglaur
Damside
Danbury
Danby
Danby Wiske
Dandaleith
Danderhall
Dane End
Dane Hills
Danebridge
Danehill
Danesmoor
Danestone
Danskine
Darby Green
Darenth
Daresbury
Darfield
Dargate
Dargues
Darite
Darlaston
Darley
Darley Dale
Darlingscott
Darlington
Darliston
Darlton
Darnabo
Darnall
Darnconner
Darnford
Darngarroch
Darnick
Darowen
Darra
Darras Hall
Darrington
Darsham
Dartfield
Dartford
Dartington
Dartmeet
Dartmouth
Dartmouth Park
Darton
Darvel
Darwen
Datchet
Datchworth
Datchworth Green
Daubhill
Daugh of Kinermony
Dauntsey
Dava
Davaar
Davan
Davenham
Daventry
Davidstow
Davington
Daviot
Davoch of Grange
Dawley
Dawlish
Dawn
Daws Heath
Dawsmere
Daylesford
Deadwaters
Deal Hall
Dean
Dean Bank
Dean Prior
Dean Row
Dean Street
Deanburnhaugh
Deane
Deanland
Deanscales
Deanshanger
Deanston
Dearham
Debach
Debden
Debden Green
Debenham
Dechmont
Deddington
Dedham
Deecastle
Deene
Deenethorpe
Deepcar
Deepcut
Deepdale
Deeping Gate
Deeping St James
Deeping St Nicholas
Deerhill
Deerhurst
Deerness
Defford
Defynnog
Deganwy
Deighton
Deiniolen
Delabole
Delancey
Delamere
Delavorar
Delfrigs
Dell Lodge
Delliefure
Delnabo
Delny
Delph
Delves
Dembleby
Denaby
Denaby Main
Denbigh
Denbury
Denby
Denby Dale
Denchworth
Dendron
Denend
Denford
Dengie
Denham
Denham Green
Denhead
Denholm
Denholme
Denholme Clough
Denio
Denmark Hill
Denmead
Denmill
Denmoss
Dennington
Denny
Dennyloanhead
Denshaw
Denside
Densole
Denston
Denstone
Dent
Denton
Denver
Denvilles
Denwick
Deopham
Deopham Green
Depden
Deptford
Deptford High Street
Derby
Derbyhaven
Deri
Derringstone
Derrington
Derry
Derry Hill
Derrythorpe
Dersingham
Dervaig
Derwen
Derwenlas
Derwydd
Derybruich
Desborough
Desford
Detchant
Detling
Deuddwr
Deunant
Deuxhill
Devauden
Devil's Bridge
Devizes
Devonport
Devons Road
Devonside
Devoran
Dewar
Dewlish
Dewsall Court
Dewsbury
Dhoon
Dhoor
Dhowin
Dhuhallow
Diabaig
Dial Post
Dibden
Dibden Purlieu
Dickleburgh
Didcot
Diddington
Diddlebury
Didley
Didling
Didmarton
Didsbury
Didworthy
Digby
Digg
Diggle
Digmoor
Digswell
Dihewyd
Dildawn
Dilham
Dilhorne
Dilston
Dilton Marsh
Dilwyn
Dilwyn Common
Dinas
Dinas Dinlle
Dinas Powys
Dinas-Mawddwy
Dinder
Dinedor
Dingestow
Dingley
Dingwall
Dinlabyre
Dinnet
Dinnington
Dinorwic
Dinton
Dinvin
Dinwoodie Mains
Dinworthy
Dippen
Dippenhall
Dippin
Dipple
Diptford
Dipton
Dirdhu
Dirleton
Discoed
Diseworth
Dishes
Dishforth
Dishig
Disley
Diss
Disserth
Distington
Ditcheat
Ditchingham
Ditchley
Ditchling
Ditteridge
Dittisham
Ditton
Ditton Green
Ditton Priors
Dixton
Dobwalls
Doccombe
Dochgarroch
Docking
Docklands
Docklow
Dockray
Doddinghurst
Doddington
Doddiscombsleigh
Dodford
Dodington
Dodington Ash
Dodleston
Dodworth
Doe Lea
Dog Village
Dogdyke
Dogmersfield
Dol-gran
Dolanog
Dolau
Dolbenmaen
Dolfach
Dolfor
Dolgarreg
Dolgarrog
Dolgellau
Dolgoch
Doll
Dollar
Dollarbeg
Dolleycanney
Dollis Hill
Dolphinholme
Dolphinton
Dolton
Dolwen
Dolwyddelan
Dolybont
Dolyhir
Dolywern
Domgay
Doncaster
Donhead St Andrew
Donhead St Mary
Donibristle
Doniford
Donington
Donington le Heath
Donington on Bain
Donisthorpe
Donkey Town
Donnington
Donyatt
Dorchester
Dordon
Dore
Dores
Dorket Head
Dorking
Dormans Park
Dormansland
Dormanstown
Dormington
Dorney
Dornie
Dornoch
Dornock
Dorrery
Dorridge
Dorrington
Dorsell
Dorsington
Dorstone
Dorton
Dorusduain
Dosthill
Dotland
Dottery
Doublebois
Dougalston
Dougarie
Doughton
Douglas
Douglas and Angus
Douglas Hall
Douglas Hill
Douglas Water
Douglastown
Doulting
Dounby
Doune
Doune Park
Douneside
Dounie
Dounreay
Dousland
Dovaston
Dove Holes
Dovenby
Dover
Dovercourt
Doverdale
Doveridge
Doversgreen
Dowally
Dowdeswell
Dowhill
Dowland
Dowlands
Dowlish Wake
Down Ampney
Down End
Down Field
Down Hatherley
Down House
Down St Mary
Down Thomas
Downderry
Downe
Downend
Downfield
Downgate
Downham
Downham Market
Downhead
Downholland Cross
Downholme
Downies
Downley
Downside
Downton
Downton on the Rock
Dowsby
Dowthwaitehead
Doynton
Draethen
Draffan
Drakeland Corner
Drakes Broughton
Drakes Cross
Drambuie
Draughton
Drax
Draycote
Draycott
Draycott in the Clay
Draycott in the Moors
Drayton
Drayton Bassett
Drayton Beauchamp
Drayton Green
Drayton Park
Drayton Parslow
Drayton St Leonard
Dre-fach
Drebley
Dreemskerry
Dreenhill
Drefach
Dreghorn
Drellingore
Drem
Drewsteignton
Driby
Driffield
Drigg
Drighlington
Drimfern
Drimlee
Drimnin
Drimore
Drimpton
Drimsynie
Drimvore
Drinkstone
Drinkstone Green
Drishaig
Drissaig
Drointon
Droitwich
Dron
Dronfield
Dronfield Woodhouse
Drongan
Dronley
Dropmore
Droxford
Droylsden
Druid
Druidston
Druimarbin
Druimavuic
Druimdrishaig
Druimindarroch
Druimkinnerras
Drum
Drumachloy
Drumbeg
Drumblade
Drumblair
Drumbuie
Drumburgh
Drumchapel
Drumchardine
Drumchork
Drumclog
Drumdelgie
Drumderfit
Drumeldrie
Drumelzier
Drumfearn
Drumfern
Drumgarve
Drumgley
Drumguish
Drumhead
Drumin
Drumine
Drumjohn
Drumlasie
Drumlemble
Drumlithie
Drummond
Drummore
Drummuir Castle
Drumnadrochit
Drumnagorrach
Drumnatorran
Drumoak
Drumore
Drumour
Drumrash
Drumrunie
Drums
Drumsturdy
Drumuie
Drumuillie
Drumvaich
Drumwhindle
Drunkendub
Drury
Dry Doddington
Dry Drayton
Dry Harbour
Dry Sandford
Dry Street
Drybeck
Drybridge
Drybrook
Drygrange
Dryhope
Drymen
Drymuir
Drynoch
Dryslwyn
Dryton
Dubford
Dubhchladach
Dubheads
Dubton
Duchal
Duchally
Duchray
Duck End
Duck's Cross
Duckington
Ducklington
Duddenhoe End
Duddingston
Duddington
Duddleswell
Duddo
Duddon
Duddon Bridge
Dudleston Heath
Dudley
Dudley Hill
Dudley Port
Dudsbury
Duffield
Duffryn
Dufftown
Duffus
Dufton
Duggleby
Duiar
Duible
Duiletter
Duinish
Duirinish
Duisdealmor
Duisky
Dukestown
Dukinfield
Dulas
Dulax
Dulcote
Dulford
Dull
Dullatur
Dullingham
Dulnain Bridge
Duloe
Dulsie
Dulverton
Dulwich
Dumbarton
Dumbleton
Dumcrieff
Dumeath
Dumfin
Dumfries
Dumgoyne
Dummer
Dunach
Dunalastair
Dunan
Dunans
Dunball
Dunbar
Dunbeath
Dunbeg
Dunblane
Dunbog
Duncanston
Dunchideock
Dunchurch
Duncow
Duncraggan
Duncrievie
Duncroist
Duncryne
Duncton
Dundee
Dundon
Dundonald
Dundonnell
Dundraw
Dundreggan
Dundrennan
Dundry
Dunearn
Dunecht
Dunfermline
Dunfield
Dunford Bridge
Dungavel
Dunham
Dunham Town
Dunham-on-the-Hill
Dunhampton
Dunholme
Dunino
Dunipace
Dunira
Dunk's Green
Dunkeld
Dunkerton
Dunkeswell
Dunkeswick
Dunkirk
Dunlappie
Dunley
Dunlop
Dunloskin
Dunmere
Dunmore
Dunnabie
Dunnet
Dunnichen
Dunning
Dunnington
Dunnockshaw
Dunoon
Dunragit
Dunrostan
Duns
Duns Tew
Dunsby
Dunscore
Dunscroft
Dunsdale
Dunsden Green
Dunsfold
Dunsford
Dunshelt
Dunsinnan
Dunsley
Dunsmore
Dunsop Bridge
Dunstable
Dunstall
Dunstall Green
Dunstan
Dunster
Dunston
Dunstone
Dunsville
Dunswell
Dunsyre
Dunterton
Duntisbourne Abbots
Duntisbourne Leer
Duntisbourne Rouse
Duntish
Duntocher
Dunton
Dunton Bassett
Dunton Green
Dunton Wayletts
Duntulm
Dunure
Dunure Mains
Dunvant
Dunvegan
Dunwich
Dura
Durdar
Durgates
Durham
Durisdeer
Durleigh
Durley
Durnamuck
Durness
Durno
Duror
Durran
Durrington
Dursley
Durston
Durweston
Dury
Duston
Duthil
Dutlas
Duton Hill
Dutton
Duxford
Dwygyfylchi
Dwyran
Dyce
Dyfatty
Dyffryn
Dyffryn Ardudwy
Dyffryn Castell
Dyffryn Ceidrych
Dyffryn Cellwen
Dyke
Dykehead
Dykelands
Dykends
Dykeside
Dylife
Dymchurch
Dymock
Dyrham
Dysart
Dyserth
Eadar Dha Fhadhail
Eagland Hill
Eagle
Eaglescliffe
Eaglesfield
Eaglesham
Eaglethorpe
Eagley
Eairy
Eakring
Ealand
Ealing
Ealing Broadway
Ealing Common
Eamont Bridge
Earby
Earcroft
Eardington
Eardisland
Eardisley
Eardiston
Earith
Earl Shilton
Earl Soham
Earl Sterndale
Earl Stonham
Earl's Common
Earl's Court
Earl's Croome
Earl's Green
Earle
Earlestown
Earlham
Earlish
Earls Barton
Earls Colne
Earlsdon
Earlsferry
Earlsfield
Earlsford
Earlston
Earlswood
Earnley
Earsairidh
Earsdon
Earsdon Moor
Earsham
Earswick
Eartham
Earthcote Green
Easby
Easdale
Easebourne
Easenhall
Eashing
Easington
Easington Colliery
Easington Lane
Easingwold
Easole Street
Eassie and Nevay
East Aberthaw
East Acton
East Allington
East Anstey
East Appleton
East Ardsley
East Ashey
East Ashling
East Auchronie
East Ayton
East Barkwith
East Barming
East Barnby
East Barnet
East Barsham
East Beckham
East Bedfont
East Bergholt
East Bilney
East Blatchington
East Boldon
East Boldre
East Bolton
East Bradenham
East Brent
East Bridge
East Bridgford
East Brora
East Buckland
East Budleigh
East Burrafirth
East Burton
East Cairnbeg
East Calder
East Carleton
East Carlton
East Chaldon
East Challow
East Charleton
East Chelborough
East Chiltington
East Chinnock
East Chisenbury
East Clandon
East Claydon
East Clyth
East Coker
East Combe
East Cornworthy
East Cottingwith
East Cowes
East Cowick
East Cowton
East Cranmore
East Creech
East Croachy
East Darlochan
East Davoch
East Dean
East Dereham
East Down
East Drayton
East Dulwich
East End
East Farleigh
East Farndon
East Ferry
East Finchley
East Fortune
East Garston
East Ginge
East Goscote
East Grafton
East Grimstead
East Grinstead
East Guldeford
East Haddon
East Hagbourne
East Halton
East Ham
East Hanney
East Hanningfield
East Hardwick
East Harling
East Harlsey
East Harptree
East Hartford
East Harting
East Hatch
East Hatley
East Hauxwell
East Haven
East Heckington
East Hedleyhope
East Helmsdale
East Hendred
East Heslerton
East Hoathly
East Horndon
East Horrington
East Horsley
East Huntspill
East Hyde
East Ilsley
East India
East India Dock Road
East Keal
East Kennett
East Keswick
East Kilbride
East Kirkby
East Knapton
East Knighton
East Knoyle
East Lambrook
East Langdon
East Langton
East Langwell
East Lavant
East Lavington
East Layton
East Leake
East Learmouth
East Learney
East Leigh
East Lexham
East Lilburn
East Linton
East Liss
East Looe
East Lound
East Lulworth
East Lutton
East Lydford
East Mains
East Malling
East March
East Marden
East Markham
East Marton
East Meon
East Mere
East Mersea
East Mey
East Molesey
East Morden
East Morton
East Ness
East Norton
East Oakley
East Ogwell
East Orchard
East Ord
East Panson
East Peckham
East Pennard
East Poringland
East Portlemouth
East Prawle
East Preston
East Putford
East Putney
East Quantoxhead
East Rainton
East Ravendale
East Raynham
East Rigton
East Rolstone
East Rounton
East Rudham
East Runton
East Ruston
East Saltoun
East Sheen
East Shefford
East Sleekburn
East Somerton
East Stockwith
East Stoke
East Stour
East Stourmouth
East Stratton
East Studdal
East Suisnish
East Taphouse
East Thirston
East Tilbury
East Tisted
East Torrington
East Tuddenham
East Tytherley
East Tytherton
East Village
East Wall
East Walton
East Wellow
East Wemyss
East Whitburn
East Wickham
East Williamston
East Winch
East Wittering
East Witton
East Woodhay
East Worldham
East Worlington
East-the-Water
Eastbourne
Eastburn
Eastbury
Eastby
Eastchurch
Eastcombe
Eastcote
Eastcott
Eastcourt
Eastend
Easter Ardross
Easter Balmoral
Easter Boleskine
Easter Borland
Easter Brae
Easter Buckieburn
Easter Compton
Easter Drummond
Easter Dullater
Easter Ellister
Easter Fearn
Easter Galcantray
Easter Kinkell
Easter Knox
Easter Lednathie
Easter Moniack
Easter Ord
Easter Poldar
Easter Quarff
Easter Skeld
Easter Suddie
Easter Tulloch
Easter Whyntie
Eastergate
Easterton
Eastertown
Eastfield
Eastfield Hall
Eastgate
Eastham
Easthampstead
Eastheath
Easthope
Easthorpe
Easthouses
Eastington
Eastleach Martin
Eastleach Turville
Eastleigh
Eastling
Eastney
Eastnor
Eastoft
Eastoke
Easton
Easton Grey
Easton Maudit
Easton on the Hill
Easton Royal
Easton-in-Gordano
Eastrea
Eastriggs
Eastrington
Eastry
Eastside
Eastville
Eastwell
Eastwick
Eastwood
Eathorpe
Eaton
Eaton Bishop
Eaton Bray
Eaton Constantine
Eaton Ford
Eaton Green
Eaton Hall
Eaton Hastings
Eaton Socon
Eaton upon Tern
Eavestone
Ebberston
Ebbesborne Wake
Ebbw Vale
Ebchester
Ebford
Ebrington
Ecchinswell
Ecclaw
Ecclefechan
Eccles
Eccles Road
Ecclesfield
Ecclesgreig
Eccleshall
Ecclesmachan
Eccleston
Eccup
Echt
Eckford
Eckington
Ecton
Edale
Edburton
Edderside
Edderton
Eddington
Eddleston
Eddlewood
Eden Park
Edenbridge
Edendonich
Edenfield
Edenhall
Edenham
Edensor
Edentaggart
Edenthorpe
Edern
Edgarley
Edgbaston
Edgcott
Edgcumbe
Edge
Edge End
Edgebolton
Edgefield
Edgeley
Edgerley
Edgeworth
Edginswell
Edgmond
Edgmond Marsh
Edgton
Edgware
Edgware Road
Edgworth
Edial
Edinample
Edinbain
Edinbanchory
Edinbarnet
Edinburgh
Edinchip
Edingale
Edingley
Edingthorpe
Edington
Edintore
Edinvale
Edistone
Edith Weston
Edithmead
Edlaston
Edlesborough
Edlingham
Edlington
Edmondsham
Edmondsley
Edmondthorpe
Edmonstone
Edmonton
Edmundbyres
Ednam
Ednaston
Edney Common
Edra
Edradynate
Edrom
Edstaston
Edstone
Edvin Loach
Edwalton
Edwardstone
Edwinsford
Edwinstowe
Edworth
Edwyn Ralph
Edzell
Efail Isaf
Efailnewydd
Efailwen
Efenechtyd
Effingham
Effirth
Efford
Egbury
Egdean
Egerton
Egerton Forstal
Egerton Green
Egg Buckland
Eggerness
Eggesford Barton
Eggington
Egginton
Egglescliffe
Eggleston
Egham
Egleton
Eglingham
Egloshayle
Egloskerry
Eglwys Cross
Eglwys Fach
Eglwys-Brewis
Eglwysbach
Eglwyswrw
Egmanton
Egmere
Egremont
Egton
Egton Bridge
Egypt
Eight Ash Green
Eignaig
Eilanreach
Eilean Darach
Eilean Iarmain
Einacleit
Eisgean
Eisingrug
Eisteddfa Gurig
Elan Village
Elberton
Elburton
Elcho
Eldernell
Eldersfield
Elderslie
Eldrick
Eldroth
Eldwick
Elephant & Castle
Elford
Elgin
Elgol
Elham
Elie
Elilaw
Elim
Eling
Elishader
Elishaw
Elkesley
Elkstone
Elland
Ellary
Ellastone
Ellemford
Ellen's Green
Ellenborough
Ellenhall
Ellerbeck
Ellerby
Ellerdine Heath
Elleric
Ellerker
Ellerton
Ellesborough
Ellesmere
Ellesmere Port
Ellingham
Ellingstring
Ellington
Ellisfield
Ellistown
Ellon
Ellonby
Ellough
Elloughton
Ellwood
Elm
Elm Park
Elmbridge
Elmdon
Elmdon Heath
Elmers End
Elmesthorpe
Elmhurst
Elmley Castle
Elmley Lovett
Elmore
Elmore Back
Elmscott
Elmsett
Elmstead Market
Elmstone
Elmstone Hardwicke
Elmswell
Elmton
Elphin
Elphinstone
Elrick
Elrig
Elrigbeag
Elsdon
Elsecar
Elsenham
Elsfield
Elsham
Elsing
Elslack
Elson
Elsrickle
Elstead
Elsted
Elsthorpe
Elstob
Elston
Elstone
Elstow
Elstree
Elstronwick
Elswick
Elsworth
Elterwater
Eltham
Elthorne Park
Eltisley
Elton
Elvanfoot
Elvaston
Elveden
Elvingston
Elvington
Elwick
Elworth
Elworthy
Ely
Embankment
Emberton
Embleton
Embo
Embo Street
Emborough
Embsay
Emery Down
Emley
Emmer Green
Emmington
Emneth
Emneth Hungate
Empingham
Empshott
Emsworth
Enborne
Enchmarsh
Enderby
Endmoor
Endon
Enfield
Enfield Chase
Enford
Engine Common
Englefield
Englefield Green
Englesea-brook
English Bicknor
English Frankton
Englishcombe
Enham Alamein
Enmore
Ennerdale Bridge
Enniskillen
Enochdu
Ensay
Ensdon
Ensis
Enstone
Enterkinfoot
Enterpen
Enville
Eolaigearraidh
Eorabus
Eorodal
Eoropaidh
Epperstone
Epping
Epping Green
Epping Upland
Eppleby
Eppleworth
Epsom
Epwell
Epworth
Erbistock
Erbusaig
Erchless Castle
Erdington
Eredine
Eriboll
Ericstane
Eridge Green
Eriff
Erines
Eriswell
Erith
Erith Marshes
Erlestoke
Ermington
Erpingham
Errogie
Errol
Errollston
Erskine
Ervie
Erwarton
Erwood
Eryholme
Eryrys
Escart
Escrick
Esgair
Esgairgeiliog
Esh
Esh Winning
Esher
Eshott
Eshton
Eskadale
Eskbank
Eskdale Green
Eskdalemuir
Eskham
Esknish
Esprick
Essendine
Essendon
Essex Road
Essich
Essington
Esslemont
Eston
Etal
Etchilhampton
Etchingham
Etchinghill
Ethie Mains
Eton
Eton Wick
Etteridge
Ettingshall
Ettington
Etton
Ettrick
Ettrickbridge
Ettrickhill
Etwall
Eurach
Euston
Euston Square
Euxton
Evanton
Evedon
Evelix
Evenjobb
Evenley
Evenlode
Evenwood
Everbay
Evercreech
Everdon
Everingham
Everleigh
Everley
Eversholt
Evershot
Eversley
Eversley Cross
Everthorpe
Everton
Evertown
Evesbatch
Evesham
Evie
Evington
Ewart Newtown
Ewden Village
Ewell
Ewell Minnis
Ewelme
Ewen
Ewenny
Ewerby
Ewerby Thorpe
Ewhurst
Ewhurst Green
Ewloe
Ewood
Eworthy
Ewshot
Ewyas Harold
Exbourne
Exbury
Exebridge
Exelby
Exeter
Exford
Exfords Green
Exhall
Exlade Street
Exminster
Exmouth
Exnaboe
Exning
Exton
Exwick
Eyam
Eydon
Eye Green
Eyemouth
Eyeworth
Eyhorne Street
Eyke
Eynesbury
Eynort
Eynsford
Eynsham
Eype
Eyre
Eythorne
Eyton
Eyton upon the Weald Moors
Eywood
Faccombe
Faceby
Fachwen
Faddiley
Fadmoor
Faebait
Faifley
Fail
Failand
Failford
Failsworth
Fain
Fair Oak
Fairbourne
Fairburn
Fairfield
Fairford
Fairgirth
Fairholm
Fairley
Fairlie
Fairlight
Fairlight Cove
Fairlop Waters
Fairmile
Fairmilehead
Fairnington
Fairoak
Fairseat
Fairstead
Fairwarp
Fairy Cross
Fairyhill
Fakenham
Fala
Fala Dam
Falahill
Faldingworth
Falfield
Falkenham
Falkirk
Falkland
Falla
Fallgate
Fallin
Falmer
Falmouth
Falsgrave
Falstone
Fanagmore
Fanans
Fancott
Fangdale Beck
Fangfoss
Fanmore
Fans
Far Cotton
Far Forest
Farcet
Farden
Fareham
Farewell
Farforth
Faringdon
Farington
Farlam
Farlary
Farleigh
Farleigh Hungerford
Farleigh Wallop
Farlesthorpe
Farleton
Farley
Farley Green
Farley Hill
Farleys End
Farlington
Farlow
Farmborough
Farmcote
Farmington
Farmoor
Farmtown
Farnborough
Farnborough Green
Farncombe
Farndish
Farndon
Farnell
Farnham
Farnham Common
Farnham Green
Farnham Royal
Farningham
Farnley
Farnley Tyas
Farnsfield
Farnworth
Farr
Farraline
Farringdon
Farrington Gurney
Farsley
Farthinghoe
Farthingloe
Farthingstone
Farway
Fasag
Fasagrianach
Fascadale
Faslane
Fasnacloich
Fasnakyle
Fassfern
Fatfield
Fattahead
Faugh
Fauldhouse
Faulkbourne
Faulkland
Fauls
Faversham
Favillar
Fawdington
Fawdon
Fawfieldhead
Fawkham Green
Fawler
Fawley
Fawley Chapel
Fawsyde
Faxfleet
Faxton
Faygate
Fazeley
Fearby
Fearn
Fearnach
Fearnan
Fearnbeg
Fearnhead
Fearnmore
Fearnoch
Featherstone
Feckenham
Feering
Feetham
Feith-hill
Feizor
Felbridge
Felbrigg
Felcourt
Felden
Felindre
Felinfach
Felinfoel
Felingwmuchaf
Felixkirk
Felixstowe
Felkington
Felldownhead
Felling
Fellonmore
Felmersham
Felmingham
Felpham
Felsham
Felsted
Feltham
Felthorpe
Felton
Felton Butler
Feltwell
Fen Ditton
Fen Drayton
Fen Street
Fence
Fence Houses
Fenchurch Street
Fencott
Fendike Corner
Fenhouses
Feniscowles
Feniton
Fenny Bentley
Fenny Bridges
Fenny Compton
Fenny Drayton
Fenny Stratford
Fenrother
Fenstanton
Fenton
Fenton Ho.
Fenwick
Feochaig
Feock
Feolin
Feolin Ferry
Feorlan
Feriniquarrie
Fern
Ferndale
Ferndown
Ferness
Fernham
Fernhill Heath
Fernhurst
Fernie
Fernilea
Fernilee
Fernybank
Ferrensby
Ferring
Ferrybridge
Ferryden
Ferryhill
Ferryside
Fersfield
Fersit
Feshiebridge
Fetcham
Fetterangus
Fettercairn
Fetternear Ho.
Feus of Caldhame
Fewcott
Fewston
Ffair-Rhos
Ffairfach
Ffarmers
Ffawyddog
Ffestiniog
Ffordd-las
Fforest
Fforest-fach
Ffos-y-ffin
Ffostrasol
Ffridd Uchaf
Ffrith
Ffrwdgrech
Ffynnon-ddrain
Ffynnongroyw
Fibhig
Fichlie
Fidden
Fiddington
Fiddler's Green
Fiddlers Hamlet
Field
Field Broughton
Field Dalling
Field Head
Fife Keith
Fifehead Magdalen
Fifehead Neville
Fifield
Fifield Bavant
Figheldean
Filby
Filey
Filgrave
Filkins
Filleigh
Fillingham
Fillongley
Filmore Hill
Filton
Fimber
Finavon
Fincham
Finchampstead
Finchdean
Finchingfield
Finchley
Finchley Central
Finchley Road
Findern
Findhorn
Findhorn Bridge
Findo Gask
Findochty
Findon
Findon Mains
Findrassie
Findron
Finedon
Finegand
Fingal Street
Fingask
Fingerpost
Fingest
Finghall
Fingland
Finglesham
Fingringhoe
Finlarig
Finmere
Finnart
Finningham
Finningly
Finnygaud
Finsbury
Finsbury Park
Finstall
Finsthwaite
Finstock
Finstown
Fintry
Finzean
Fionnphort
Fir Tree
Fir Vale
Firbank
Firbeck
Firgrove
Firs Road
Firsby
Firth
Fishbourne
Fishburn
Fisher's Pond
Fisher's Row
Fisherford
Fisherstreet
Fisherton
Fisherton de la Mere
Fishguard
Fishlake
Fishley Barton
Fishpond Bottom
Fishponds
Fishpool
Fishtoft
Fishtoft Drove
Fishtown of Usan
Fishwick
Fiskerton
Fittleton
Fittleworth
Fitton End
Fitz
Fitzhead
Fitzwilliam
Fiunary
Five Ash Down
Five Ashes
Five Bridges
Five Oak Green
Five Oaks
Five Roads
Five Turnings
Five Wents
Fivehead
Fivelanes
Flackwell Heath
Fladbury
Fladdabister
Flagg
Flamborough
Flamstead
Flamstead End
Flansham
Flasby
Flashader
Flask Inn
Flaunden
Flawborough
Flawith
Flax Bourton
Flaxby
Flaxley
Flaxpool
Flaxton
Fleckney
Flecknoe
Fleet Hargate
Fleet Street
Fleetwood
Flemingston
Flemington
Flempton
Fleoideabhagh
Fletchertown
Fletching
Flete
Fleur-de-lis
Flexbury
Flexford
Flimby
Flimwell
Flint
Flint Cross
Flint Mountain
Flintham
Flinton
Flishinghurst
Flitcham
Flitton
Flitwick
Flixborough
Flixton
Flockton
Flockton Green
Flodden
Flodigarry
Flookburgh
Floors
Flordon
Flore
Flotterton
Flowton
Flushing
Flyford Flavell
Fobbing
Fochabers
Fochriw
Fockerby
Fodderletter
Fodderty
Foel
Foffarty
Foggathorpe
Fogo
Fogorig
Foindle
Folda
Fole
Foleshill
Folke
Folkestone
Folkingham
Folkington
Folksworth
Folkton
Folla Rule
Follifoot
Folly
Folly Gate
Fonthill Bishop
Fonthill Gifford
Fontmell Magna
Fontwell
Foolow
Foots Cray
Forbestown
Force Forge
Forcett
Forches Cross
Ford End
Ford Street
Fordcombe
Fordell
Forden
Forder Green
Fordham
Fordingbridge
Fordon
Fordoun
Fordstreet
Fordwells
Fordwich
Fordyce
Forebrae
Foreland
Forest Gate
Forest Green
Forest Hall
Forest Head
Forest Hill
Forest Lodge
Forest Mill
Forest Row
Forest Town
Forest-in-Teesdale
Forestburn Gate
Forestside
Forfar
Forgandenny
Forgie
Formby
Forncett End
Forncett St Mary
Forncett St Peter
Forneth
Fornham All Saints
Fornham St Martin
Fornighty
Forres
Forrest
Forsbrook
Forse
Forsie
Forsinain
Forsinard
Forston
Fort Augustus
Fort George
Fort William
Forter
Forteviot
Forth
Forthampton
Fortingall
Fortis Green
Forton
Fortrie
Fortrose
Fortune Green
Fortuneswell
Forty Green
Forty Hill
Forward Green
Fosbury
Foscot
Fosdyke
Foss
Foss Cross
Fossdale
Fossebridge
Foster Street
Foster's Booth
Foston
Foston on the Wolds
Fotherby
Fotheringhay
Foubister
Foul Mile
Foulbog
Foulden
Foulridge
Foulsham
Foulzie
Fountainhall
Four Ashes
Four Crosses
Four Elms
Four Forks
Four Gotes
Four Lanes
Four Marks
Four Mile Bridge
Four Oaks
Four Roads
Four Throws
Fourlane Ends
Fourlanes End
Fourpenny
Fourstones
Fovant
Foveran
Fowey
Fowlis
Fowlis Wester
Fowlmere
Fownhope
Fox Lane
Fox Street
Foxcote
Foxdale
Foxearth
Foxfield
Foxham
Foxhole
Foxholes
Foxhunt Green
Foxley
Foxt
Foxton
Foxup
Foxwist Green
Foy
Foyers
Frachadil
Fraddam
Fraddon
Fradley
Fradswell
Fraisthorpe
Framfield
Framingham Earl
Framingham Pigot
Framlingham
Frampton
Frampton Cotterell
Frampton Mansell
Frampton on Severn
Frampton West End
Framsden
Framwellgate Moor
Franche
Frankby
Frankley
Frankton
Frant
Fraserburgh
Frating Green
Fratton
Freathy
Freckenham
Freckleton
Freeby
Freefolk
Freeland
Freemantle
Freester
Freethorpe
Freethorpe Common
Freiston
Freiston Shore
Fremington
Frenchay
Frenchbeer
Frendraught
Frenich
Frensham
Fresgoe
Freshfield
Freshford
Freshwater
Freshwater East
Fressingfield
Freston
Freswick
Frettenham
Freuchie
Freystrop Cross
Friar's Gate
Friars Carse
Friarton
Friday Bridge
Friday Street
Fridaythorpe
Friern Barnet
Friesthorpe
Frieth
Frilford
Frilsham
Frimley
Frimley Green
Frindsbury
Fring
Fringford
Frinsted
Frinton-on-Sea
Friockheim
Friog
Frisby on the Wreake
Friskney
Friskney Eaudike
Friston
Fritchley
Frith
Frith Bank
Frith Common
Fritham
Frithelstock
Frithelstock Stone
Frithville
Frittenden
Fritton
Fritwell
Frizington
Frocester
Frodesley
Frodingham
Frodsham
Frog End
Frog Pool
Frogden
Froggatt
Froghall
Frogham
Frogmore
Frolesworth
Frome
Frome St Quentin
Fromes Hill
Fron
Fron-goch
Froncysyllte
Frostenden
Frosterley
Froxfield
Froxfield Green
Fryerning
Fryton
Fugglestone St Peter
Fulbeck
Fulbourn
Fulbrook
Fulford
Fulham
Fulham Broadway
Fulham Palace Road
Fulking
Full Sutton
Fuller Street
Fuller's Moor
Fullerton
Fulletby
Fullwood
Fulmer
Fulmodeston
Fulnetby
Fulready
Fulstow
Fulwell
Fulwood
Fundenhall
Funtington
Funtley
Funzie
Furley
Furnace
Furness Vale
Furneux Pelham
Furze Platt
Furzedown
Furzehill
Fyfett
Fyfield
Fylingthorpe
Fyvie
Gabhsunn Bho Dheas
Gabhsunn Bho Thuath
Gablon
Gabroc Hill
Gaddesby
Gaddesden Row
Gaer
Gaerllwyd
Gaerwen
Gagingwell
Gaich
Gaick
Gaick Lodge
Gailey
Gainford
Gainsborough
Gairloch
Gairlochy
Gairney Bank
Gaitsgill
Galabank
Galashiels
Galdenoch
Galgate
Galhampton
Gallanach
Gallantry Bank
Gallatown
Gallchoille
Galley Common
Galleyend
Galleywood
Gallowfauld
Gallowstree Common
Gallowstree Elm
Galltair
Galmisdale
Galmpton
Galphay
Galston
Galtrigill
Gamble's Green
Gamblesby
Gamlingay
Gammersgill
Gamrie
Gamston
Ganarew
Ganllwyd
Gannochy
Ganstead
Ganthorpe
Ganton
Gaodhail
Gara Bridge
Garabal
Garbat
Garbhallt
Garboldisham
Garden
Garden City
Gardenstown
Garderhouse
Gardham
Gare Hill
Garelochhead
Garford
Garforth
Gargrave
Gargunnock
Gariob
Garlieston
Garlogie
Garmond
Garmony
Garmouth
Garn
Garn-Dolbenmaen
Garnant
Garneddwen
Garnett Bridge
Garnswllt
Garrabost
Garrachra
Garralburn
Garras
Garreg
Garreg Bank
Garrick
Garrigill
Garroch
Garros
Garrow
Garryhorn
Garrynahine
Garsdale Head
Garsdon
Garshall Green
Garsington
Garstang
Garston
Garswood
Gartachoil
Gartally
Gartavaich
Gartbreck
Gartcosh
Garth
Garthbrengy
Gartheli
Garthmyl
Garthorpe
Garthynty
Gartincaper
Gartly
Gartmore
Gartnagrenach
Gartnatra
Gartness
Gartocharn
Garton
Garton-on-the-Wolds
Gartymore
Garvald
Garvamore
Garvan
Garvard
Garve
Garveld
Garvestone
Garvie
Garvock
Garwald
Garwaldwaterfoot
Garway
Garway Hill
Gask
Gass
Gastard
Gasthorpe
Gatcombe
Gate Burton
Gate Helmsley
Gateacre
Gatebeck
Gateford
Gateforth
Gatehead
Gatehouse
Gatehouse of Fleet
Gatelawbridge
Gateley
Gatenby
Gateshaw
Gateshead
Gatesheath
Gateside
Gateslack
Gathurst
Gatley
Gattonside
Gaufron
Gaulby
Gauldry
Gaunt's Common
Gautby
Gavinton
Gawber
Gawcott
Gawsworth
Gawthrop
Gawthwaite
Gay Street
Gaydon
Gayhurst
Gayles
Gayton
Gayton le Marsh
Gayton le Wold
Gayton Thorpe
Gaywood
Gazeley
Geanies Ho.
Gearach
Gearnsary
Gearraidh Bhailteas
Gearraidh Bhaird
Gearraidh na Monadh
Gearrannan
Geary
Gedding
Geddington
Gedgrave Hall
Gedling
Gedney
Gedney Broadgate
Gedney Drove End
Gedney Dyke
Gedney Hill
Gee Cross
Geirninis
Geisiadar
Geldeston
Gell
Gelli Gynan
Gelligaer
Gellilydan
Gellioedd
Gelly
Gellyburn
Gellywen
Gelston
Gembling
Genoch
Genoch Square
Gentleshaw
George Green
George Nympton
Georgeham
Georgetown
Gerlan
Germansweek
Germoe
Gerrans
Gerrards Cross
Gerston
Gestingthorpe
Geuffordd
Geufron
Gibbshill
Gibraltar
Gidea Park
Gidleigh
Giffnock
Gifford
Giffordland
Giggleswick
Gilberdyke
Gilchriston
Gilcrux
Gildersome
Gildingwells
Gileston
Gilfach
Gilfach Goch
Gilfachrheda
Gilgarran
Gill's Green
Gillamoor
Gillen
Gillenbie
Gillfoot
Gilling East
Gilling West
Gillingham
Gillivoan
Gillock
Gillow Heath
Gills
Gilmanscleuch
Gilmerton
Gilmilnscroft
Gilmonby
Gilmorton
Gilsland
Gilsland Spa
Gilston
Gilston Park
Gilwell Park
Gilwern
Gimingham
Giosla
Gipping
Gipsey Bridge
Gipsy Hill
Girlsta
Girsby
Girtford
Girthon
Girton
Girvan
Gisburn
Gisleham
Gislingham
Gissing
Gittisham
Givons Grove
Glack
Glackour
Gladestry
Gladsmuir
Glaic
Glais
Glaisdale
Glaister
Glamis
Glan Adda
Glan Honddu
Glan-Conwy
Glan-Dwyfach
Glan-llynfi
Glan-y-don
Glan-y-llyn
Glan-yr-afon
Glanaber Terrace
Glanaman
Glanbran
Glanderston
Glandford
Glandwr
Glangrwyne
Glanmule
Glanrhyd
Glanton
Glantwymyn
Glanvilles Wootton
Glapthorn
Glapwell
Glasahoile
Glasbury
Glaschoil
Glascoed
Glascorrie
Glascote
Glascwm
Glasdrum
Glasfryn
Glasgow
Glashmore
Glasinfryn
Glasnacardoch
Glasnakille
Glaspwll
Glassaugh
Glassburn
Glassel
Glassenbury
Glasserton
Glassford
Glasshouse Hill
Glasshouses
Glassingall
Glasslie
Glasson
Glassonby
Glasterlaw
Glaston
Glastonbury
Glatton
Glazebury
Glazeley
Gleadless
Gleadsmoss
Gleann Ghrabhair
Gleann Tholastaidh
Gleaston
Glecknabae
Gledhow
Gledrid
Glemsford
Glen
Glen Auldyn
Glen Parva
Glen Vine
Glenae
Glenaladale
Glenald
Glenamachrie
Glenarm
Glenbarr
Glenbeg
Glenbeich
Glenbervie
Glenboig
Glenborrodale
Glenbranter
Glenbreck
Glenbrittle
Glenbuck
Glencaple
Glencarse
Glencat
Glenceitlein
Glencoe
Glenconglass
Glencraig
Glencripesdale
Glencrosh
Glencruittein
Glencuie
Glendearg
Glendessary
Glendevon
Glendoebeg
Glendoick
Glendoll Lodge
Glendoune
Glendrissaig
Glenduckie
Glenduisk
Glendye Lodge
Gleneagles
Glenegedale
Glenelg
Glenfarg
Glenfeochan
Glenfield
Glenfinnan
Glenfoot
Glengalmadale
Glengap
Glengarnock
Glengennet
Glengolly
Glengrasco
Glengyle
Glenhead
Glenhead Farm
Glenhurich
Glenkerry
Glenkiln
Glenkin
Glenkindie
Glenlair
Glenlatterach
Glenlean
Glenlee
Glenlichorn
Glenlivet
Glenlochar
Glenluce
Glenmallan
Glenmanna
Glenmavis
Glenmaye
Glenmeanie
Glenmore
Glenmoy
Glennoe
Glenochar
Glenogil
Glenprosen
Glenquiech
Glenramskill
Glenrazie
Glenridding
Glenrisdell
Glenrossal
Glenrothes
Glensanda
Glensaugh
Glensgaich
Glenshalg
Glenshee
Glenshellish
Glensluan
Glentaggart
Glentham
Glenton
Glentress
Glentrool
Glentruan
Glentworth
Glenure
Glenurquhart
Glenwhilly
Glespin
Gletness
Glewstone
Glinton
Glooston
Glororum
Glossop
Gloster Hill
Gloucester
Gloucester Road
Gloup
Gloweth
Glusburn
Gluss
Glympton
Glyn
Glyn Ceiriog
Glyn-Cywarch
Glyn-Neath
Glynarthen
Glyncoch
Glyncorrwg
Glynde
Glyndebourne
Glyndyfrdwy
Glynogwr
Glyntaff
Glynteg
Gnosall
Gnosall Heath
Goadby
Goadby Marwood
Goatacre
Goatfield
Goathill
Goathland
Goathurst
Gobernuisgeach
Gobhaig
Gobowen
Godalming
Godford Cross
Godmanchester
Godmanstone
Godmersham
Godolphin Cross
Godor
Godre'r-graig
Godshill
Godstone
Goetre
Goff's Oak
Gogar
Gogarth
Goginan
Goirtean a'Chladaich
Goirtein
Golan
Golant
Golberdon
Golborne
Golcar
Goldcliff
Golden Cross
Golden Green
Golden Grove
Golden Pot
Golden Valley
Goldenhill
Golders Green
Golders Hill Park
Goldhanger
Goldhawk Road
Goldielea
Golding
Goldington
Goldsborough
Goldsithney
Goldthorpe
Goldworthy
Gollanfield
Golspie
Golval
Gomeldon
Gomersal
Gomshall
Gonachan
Gonalston
Gonfirth
Good Easter
Gooderstone
Goodge Street
Goodleigh
Goodmanham
Goodnestone
Goodrich
Goodrington
Goodwick
Goodworth Clatford
Goodyers End
Goole
Goonbell
Goonhavern
Goose Green
Gooseham
Goosewell
Goosey
Goosnargh
Goostrey
Gorcott Hill
Gorddinog
Gordonbush
Gordonstoun
Gordonstown
Gore Street
Gorebridge
Gorefield
Goring
Goring-by-Sea
Gorleston on Sea
Gorllwyn
Gornalwood
Gorrachie
Gorran Churchtown
Gorran Haven
Gors
Gorsedd
Gorseinon
Gorseness
Gorsgoch
Gorslas
Gorsley
Gorsley Common
Gorstan
Gorteneorn
Gorton
Gosbeck
Gosberton
Goseley Dale
Gosfield
Gosforth
Gosmore
Gospel End
Gospel Oak
Gosport
Gossabrough
Gossops Green
Goswell Road
Goswick
Gotham
Gotherington
Gott
Goudhurst
Goulceby
Gourdas
Gourdon
Gourock
Govan
Goveton
Govilon
Gowdall
Gowerton
Gowkhall
Gowthorpe
Goxhill
Grabhair
Gradbach
Graffham
Grafham
Grafton
Grafton Flyford
Grafton Regis
Grafton Underwood
Grafty Green
Graianrhyd
Graig
Graig-fechan
Grain
Grainel
Grainhow
Grainsby
Grainthorpe
Grampound
Grampound Road
Gramsdal
Granborough
Granby
Grandborough
Grandtully
Grange
Grange Crossroads
Grange Hall
Grange Hill
Grange Moor
Grange of Lindores
Grange Park
Grange Villa
Grange-over-Sands
Grangemill
Grangemouth
Grangemuir
Grangeston
Grangetown
Granish
Gransmoor
Granston
Grantchester
Grantham
Grantley
Grantlodge
Grantown-on-Spey
Grantshouse
Grappenhall
Grasby
Grasmere
Grasscroft
Grassendale
Grassholme
Grassington
Grassmoor
Grassthorpe
Grateley
Gratwich
Graveley
Gravelly Hill
Gravels
Graven
Graveney
Gravesend
Grayingham
Grayrigg
Grays
Grayshott
Grayswood
Grazeley
Greasbrough
Greasby
Great Abington
Great Addington
Great Alne
Great Altcar
Great Amwell
Great Asby
Great Ashfield
Great Ayton
Great Baddow
Great Bardfield
Great Barford
Great Barr
Great Barrington
Great Barrow
Great Barton
Great Barugh
Great Bavington
Great Bealings
Great Bedwyn
Great Bentley
Great Billing
Great Bircham
Great Blakenham
Great Bolas
Great Bookham
Great Bourton
Great Bowden
Great Bradley
Great Braxted
Great Bricett
Great Brickhill
Great Bridgeford
Great Brington
Great Bromley
Great Broughton
Great Budworth
Great Burdon
Great Burstead
Great Busby
Great Canfield
Great Canney
Great Carlton
Great Casterton
Great Chart
Great Chatwell
Great Chesterford
Great Cheverell
Great Chishill
Great Clacton
Great Clifton
Great Coates
Great Comberton
Great Corby
Great Cornard
Great Cowden
Great Coxwell
Great Crakehall
Great Cransley
Great Cressingham
Great Crosby
Great Cubley
Great Dalby
Great Doddington
Great Driffield
Great Dunham
Great Dunmow
Great Durnford
Great Easton
Great Eccleston
Great Edstone
Great Ellingham
Great Elm
Great Eversden
Great Fencote
Great Finborough
Great Fransham
Great Gaddesden
Great Gidding
Great Givendale
Great Glemham
Great Glen
Great Gonerby
Great Gransden
Great Green
Great Habton
Great Hale
Great Hallingbury
Great Hanwood
Great Harrowden
Great Harwood
Great Haseley
Great Hatfield
Great Haywood
Great Heath
Great Heck
Great Henny
Great Hinton
Great Hockham
Great Holland
Great Horkesley
Great Hormead
Great Horwood
Great Houghton
Great Hucklow
Great Kelk
Great Kimble
Great Kingshill
Great Langton
Great Leighs
Great Limber
Great Linford
Great Livermere
Great Longstone
Great Lumley
Great Lyth
Great Malvern
Great Maplestead
Great Marton
Great Massingham
Great Melton
Great Milton
Great Missenden
Great Mitton
Great Mongeham
Great Moulton
Great Musgrave
Great Ness
Great North Way
Great Oak
Great Oakley
Great Offley
Great Ormside
Great Orton
Great Ouseburn
Great Oxendon
Great Oxney Green
Great Palgrave
Great Parndon
Great Paxton
Great Plumpton
Great Plumstead
Great Ponton
Great Portland Street
Great Preston
Great Raveley
Great Rissington
Great Rollright
Great Ryburgh
Great Ryle
Great Ryton
Great Saling
Great Salkeld
Great Sampford
Great Sankey
Great Saxham
Great Shefford
Great Shelford
Great Smeaton
Great Snoring
Great Somerford
Great Stainton
Great Stambridge
Great Staughton
Great Steeping
Great Stonar
Great Strickland
Great Stukeley
Great Sturton
Great Sutton
Great Swinburne
Great Tew
Great Tey
Great Thurlow
Great Torrington
Great Tosson
Great Totham
Great Urswick
Great Wakering
Great Waldingfield
Great Walsingham
Great Waltham
Great Warley
Great Washbourne
Great Welnetham
Great Wenham
Great West Road
Great Whittington
Great Wigborough
Great Wilbraham
Great Wishford
Great Witcombe
Great Witley
Great Wolford
Great Woolstone
Great Wratting
Great Wymondley
Great Wyrley
Great Wytheford
Great Yarmouth
Great Yeldham
Greatford
Greatgate
Greatham
Greatstone-on-Sea
Greatworth
Green End
Green Hammerton
Green Ore
Green Park
Green Street
Green Street Green
Green Tye
Greenburn
Greencroft Hall
Greendams
Greendykes
Greenfield
Greenford
Greengairs
Greenhalgh
Greenhall
Greenham
Greenhaugh
Greenhead
Greenheads
Greenhill
Greenhithe
Greenholm
Greenholme
Greenhow Hill
Greenigo
Greenland
Greenlands
Greenlaw
Greenloaning
Greenmount
Greenmyre
Greenock
Greenodd
Greens Norton
Greenscares
Greenside
Greenskares
Greenstead Green
Greensted
Greenway
Greenwich
Greet
Greete
Greetham
Greetland
Greinetobht
Greinton
Grenaby
Grendon
Grendon Common
Grendon Green
Grendon Underwood
Grenoside
Greosabhagh
Gresford
Gresham
Greshornish
Gressenhall
Gressingham
Greta Bridge
Gretna
Gretna Green
Gretton
Grewelthorpe
Greylake
Greys Green
Greysouthen
Greystoke
Greystone
Greywell
Griais
Gribthorpe
Gribton
Gridley Corner
Griff
Griffithstown
Grigadale
Grigghall
Grimeford Village
Grimethorpe
Griminis
Grimister
Grimley
Grimmet
Grimness
Grimoldby
Grimpo
Grimsargh
Grimsbury
Grimsby
Grimscote
Grimscott
Grimsiadar
Grimsthorpe
Grimston
Grimstone
Grindale
Grindiscol
Grindle
Grindleford
Grindleton
Grindley
Grindlow
Grindon
Gringley 0n the Hill
Grinsdale
Grinshill
Grinton
Griomarstaidh
Grishipoll
Gristhorpe
Griston
Gritley
Grittenham
Grittleton
Grizebeck
Grizedale
Grobister
Groby
Groes
Groes-faen
Groes-lwyd
Groesffordd
Groesffordd Marli
Groeslon
Grogport
Groigearraidh
Gromford
Gronant
Groombridge
Grosmont
Grotaig
Groton
Grove
Grove Park
Grovesend
Gruids
Gruinart Flats
Gruline
Grundcruie
Grundisburgh
Gruting
Grutness
Gualachulain
Guardbridge
Guarlford
Guay
Gubbergill
Guestling Green
Guestling Thorn
Guestwick
Guide Post
Guilden Morden
Guilden Sutton
Guildford
Guildtown
Guilsborough
Guilsfield
Guisborough
Guiseley
Guist
Guith
Guiting Power
Gulberwick
Gullane
Gulval
Gulworthy
Gumfreston
Gumley
Gunby
Gundleton
Gunn
Gunnersbury
Gunnerside
Gunnerton
Gunness
Gunnislake
Gunnista
Gunter's Bridge
Gunthorpe
Gunville
Gunwalloe
Gurnard
Gurney Slade
Gurnos
Gussage All Saints
Gussage St Michael
Guston
Gutcher
Guthrie
Guy's Head
Guy's Marsh
Guyhirn
Guynd
Guyzance
Gwaelod-y-garth
Gwaenysgor
Gwaithla
Gwalchmai
Gwaun-Cae-Gurwen
Gwaun-leision
Gwaynynog
Gwbert
Gweek
Gwehelog
Gwenddwr
Gwennap
Gwenter
Gwernaffield
Gwernesney
Gwernogle
Gwernymynydd
Gwersyllt
Gwespyr
Gwinear
Gwithian
Gwyddelwern
Gwyddgrug
Gwystre
Gwytherin
Gyfelia
Gyffin
Gyre
Gyrn Goch
Habberley
Habrough
Haccombe
Hacconby
Haceby
Hacheston
Hackenthorpe
Hackford
Hackforth
Hackland
Hackleton
Hacklinge
Hackness
Hackney
Hackney Marshes
Hackney Wick
Hackthorn
Hackthorpe
Hadden
Haddenham
Haddington
Haddiscoe
Haddon
Hademore
Hadfield
Hadham Cross
Hadham Ford
Hadleigh
Hadley
Hadley End
Hadley Wood
Hadlow
Hadlow Down
Hadnall
Hadstock
Hadzor
Haffenden Quarter
Hafod-Dinbych
Hafodunos
Haggate
Haggbeck
Haggerston
Haggs
Hagley
Hagnaby
Hagworthingham
Haigh
Haighton Green
Hail Weston
Haile
Hailey
Hailsham
Haimer
Hainault
Hainford
Hainton
Haisthorpe
Halam
Halbeath
Halberton
Halcro
Hale
Hale Bank
Hale End
Hale Street
Halebarns
Hales
Hales Place
Halesowen
Halesworth
Halewood
Halford
Halfpenny Green
Halfway
Halfway House
Halfway Houses
Halghton Mill
Halifax
Halistra
Halkirk
Halkyn
Hall Dunnerdale
Hall Green
Hall of the Forest
Hall's Green
Hall's Tenement
Halland
Hallaton
Hallatrow
Hallbankgate
Hallen
Hallin
Halling
Hallington
Halloughton
Hallow
Hallow Heath
Hallrule
Hallsands
Halltoft End
Hallworthy
Halmer End
Halmore
Halmyre Mains
Halnaker
Halsall
Halse
Halsetown
Halsham
Halsinger
Halstead
Halstock
Haltham
Halton
Halton East
Halton Gill
Halton Holegate
Halton Lea Gate
Halton West
Haltwhistle
Halvergate
Halwell
Halwill
Halwill Junction
Ham
Ham Green
Ham Hill
Ham House
Ham Street
Hamble-le-Rice
Hambleden
Hambledon
Hambleton
Hambleton Moss Side
Hambridge
Hambrook
Hameringham
Hamerton
Hamilton
Hamlet
Hammer
Hammerpot
Hammersmith
Hammersmith & Fulham
Hammerwich
Hammerwood
Hammond Street
Hammoon
Hamnavoe
Hampden Park
Hampnett
Hampole
Hampreston
Hampstead
Hampstead Garden Suburb
Hampstead Heath
Hampstead Norris
Hampsthwaite
Hampton
Hampton Bishop
Hampton Heath
Hampton in Arden
Hampton Lovett
Hampton Lucy
Hampton on the Hill
Hampton Poyle
Hamptworth
Hamsey
Hamstall Ridware
Hamstead
Hamstead Marshall
Hamsterley
Hamstreet
Hanbury
Hanbury Woodend
Hanchurch
Handbridge
Handcross
Handforth
Handley
Handsacre
Handsworth
Hanford
Hanger Lane
Hanging Bridge
Hanging Langford
Hangingshaw
Hangleton
Hanham
Hankelow
Hankerton
Hankham
Hanley
Hanley Castle
Hanley Child
Hanley Swan
Hanley William
Hanlith
Hanmer
Hannah
Hannington
Hannington Wick
Hanslope
Hanthorpe
Hanwell
Hanworth
Happisburgh
Happisburgh Common
Hapsford
Hapton
Harberton
Harbertonford
Harbledown
Harborne
Harborough Magna
Harbottle
Harbourneford
Harbridge
Harburn
Harbury
Harby
Harcombe
Harden
Hardenhuish
Hardgate
Hardham
Hardingham
Hardings Wood
Hardingstone
Hardington
Hardington Mandeville
Hardington Marsh
Hardley
Hardley Street
Hardmead
Hardraw
Hardstoft
Hardway
Hardwick
Hardwicke
Hardy's Green
Hare Green
Hare Hatch
Hare Street
Hareby
Hareden
Harefield
Harehills
Harelaw
Haresceugh
Harescombe
Haresfield
Harewood
Harewood End
Harford
Hargate
Hargrave
Haringey
Harker
Harkstead
Harlaston
Harlaxton
Harle Syke
Harlech
Harlesden
Harleston
Harlestone
Harley
Harleyholm
Harlington
Harlosh
Harlow
Harlow Hill
Harlthorpe
Harlton
Harman's Cross
Harmby
Harmer Green
Harmer Hill
Harmondsworth
Harmston
Harnham
Harnhill
Harold Hill
Harold Wood
Haroldston West
Haroldswick
Harome
Harpenden
Harpford
Harpham
Harpley
Harpole
Harpsdale
Harpsden
Harpswell
Harpur Hill
Harpurhey
Harrapool
Harrietfield
Harrietsham
Harringay
Harrington
Harringworth
Harris
Harriseahead
Harrogate
Harrold
Harrow
Harrow (N, W and S)
Harrow on the Hill
Harrow Weald
Harrowbarrow
Harrowden
Harston
Hart
Hartburn
Hartest
Hartfield
Hartford
Hartford End
Hartfordbridge
Harthill
Hartington
Hartland
Hartlebury
Hartlepool
Hartley
Hartley Wespall
Hartley Wintney
Hartlip
Harton
Hartpury
Hartrigge
Hartshill
Hartshorne
Hartsop
Hartwell
Hartwood
Harvel
Harvington
Harwell
Harwich
Harwood
Harwood Dale
Harwood on Teviot
Harworth
Hasbury
Hascombe
Haselbech
Haselbury Plucknett
Haseley
Haselor
Hasfield
Hasguard
Haskayne
Hasketon
Hasland
Haslemere
Haslingden
Haslingden Grane
Haslingfield
Haslington
Hassall
Hassall Green
Hassell Street
Hassendean
Hassingham
Hassocks
Hassop
Haster
Hastigrow
Hastingleigh
Hastings
Hastingwood
Hastoe
Haswell
Hatch
Hatch Beauchamp
Hatch End
Hatch Green
Hatching Green
Hatchmere
Hatcliffe
Hatfield
Hatfield Broad Oak
Hatfield Heath
Hatfield Hyde
Hatfield Peverel
Hatfield Woodhouse
Hatford
Hatherden
Hatherleigh
Hathern
Hatherop
Hathersage
Hatherton
Hatley St George
Hatt
Hattingley
Hatton
Hatton Castle
Hatton Heath
Hatton of Fintray
Hattoncrook
Haugh Head
Haugh of Glass
Haugh of Urr
Haugham
Haughhead
Haughley
Haughley Green
Haughley New Street
Haughs
Haughton
Haughton Green
Haughton Le Skerne
Haughton Moss
Haultwick
Haunn
Haunton
Hauxley
Hauxton
Havant
Haven
Haven Side
Havenstreet
Haverfordwest
Haverhill
Haverigg
Havering
Havering-atte-Bower
Haversham
Haverthwaite
Haverton Hill
Hawarden
Hawbridge
Hawcoat
Hawen
Hawes
Hawford
Hawick
Hawkchurch
Hawkedon
Hawkenbury
Hawkeridge
Hawkerland
Hawkes End
Hawkesbury
Hawkesbury Upton
Hawkhill
Hawkhurst
Hawkinge
Hawkley
Hawkridge
Hawkshead
Hawksland
Hawkswick
Hawksworth
Hawkwell
Hawley
Hawling
Hawnby
Haworth
Hawstead
Hawthorn
Hawthorn Hill
Hawthorpe
Hawton
Haxby
Haxey
Haxted
Hay Mills
Hay Street
Hay-on-Wye
Haydock
Haydon
Haydon Bridge
Haydon Wick
Haydons Road
Haye
Hayes
Hayfield
Hayhillock
Haylands
Hayle
Hayling Island
Haynes
Haynes Church End
Hayscastle
Hayscastle Cross
Hayton
Hayton's Bent
Haytor Vale
Haywards Heath
Haywood Oaks
Hazel End
Hazel Grove
Hazelbank
Hazelbury Bryan
Hazeleigh
Hazeley
Hazelhead
Hazelside
Hazelslade
Hazelton Walls
Hazelwood
Hazlefield
Hazlemere
Hazlerigg
Hazleton
Heacham
Head Bridge
Headbourne Worthy
Headcorn
Headington
Headlam
Headless Cross
Headley
Headley Down
Headon
Heads Nook
Heage
Healaugh
Heald Green
Heale
Healey
Healeyfield
Healing
Heamoor
Heanish
Heanor
Heanton Punchardon
Heanton Satchville
Heapham
Hearthstane
Heasley Mill
Heast
Heath
Heath and Reach
Heath End
Heath Hayes
Heath Hill
Heath House
Heath Town
Heathcot
Heathcote
Heather
Heathfield
Heathton
Heatley
Heaton
Heaton Moor
Heaverham
Heaviley
Hebburn
Hebden
Hebden Bridge
Hebden Green
Hebing End
Hebron
Heck
Heckfield
Heckfield Green
Heckfordbridge
Heckingham
Heckington
Heckmondwike
Heddington
Heddle
Heddon-on-the-Wall
Hedenham
Hedge End
Hedgerley
Hedging
Hedley on the Hill
Hednesford
Hedon
Hedsor
Heeley
Heglibister
Heighington
Heights of Brae
Heilam
Heithat
Heiton
Hele
Hele Bridge
Hele Lane
Helebridge
Helensburgh
Helford
Helhoughton
Helions Bumpstead
Helland
Hellandbridge
Hellesdon
Hellidon
Hellifield
Hellingly
Hellington
Hellister
Helmdon
Helmingham
Helmsdale
Helmshore
Helmsley
Helmsley Sproxton
Helperby
Helperthorpe
Helpringham
Helpston
Helsby
Helston
Helstone
Helton
Helwith Bridge
Hemblington
Hemborough Post
Hemel Hempstead
Hemingbrough
Hemingby
Hemingford Abbots
Hemingford Grey
Hemingstone
Hemington
Hemley
Hemlington
Hempholme
Hempnall
Hempnall Green
Hempriggs
Hempriggs House
Hempstead
Hempsted
Hempton
Hemsby
Hemswell
Hemsworth
Hemyock
Henbury
Henderland
Hendersyde Park
Hendon
Hendon Central
Hendy
Heneglwys
Henfield
Henford
Hengherst
Hengoed
Hengrave
Henham
Heniarth
Henlade
Henley
Henley Corner
Henley Park
Henley's Down
Henley-in-Arden
Henley-on-Thames
Henllan
Henllan Amgoed
Henllys
Henlow
Hennock
Henny Street
Henry's Moat
Henryd
Hensall
Henshaw
Hensingham
Henstead
Hensting
Henstridge
Henstridge Ash
Henstridge Marsh
Henton
Henwick
Henwood
Heogan
Heol Lly Goden
Heol Senni
Heol-ddu
Heol-y-Cyw
Hepburn
Hepple
Hepscott
Heptonstall
Hepworth
Herbrandston
Herdicott
Hereford
Heriot
Hermiston
Hermitage
Hermon
Herne
Herne Bay
Herne Common
Herne Hill
Herner
Hernhill
Herodsfoot
Heron Quays
Heron's Ghyll
Herongate
Heronsgate
Herriard
Herring's Green
Herringfleet
Herringswell
Herrington
Hersden
Hersham
Herstmonceux
Herston
Hertford
Hertford Heath
Hertingfordbury
Hesket Newmarket
Hesketh Bank
Hesketh Lane
Heskin Green
Hesleden
Hesleyside
Heslington
Hessay
Hessenford
Hessett
Hessle
Hest Bank
Heston
Heswall
Hethe
Hetherington
Hethersett
Hethersgill
Hethpool
Hett
Hetton
Hetton-le-Hole
Heugh
Heugh-head
Heveningham
Hever
Heversham
Hevingham
Hewas Water
Hewell Grange
Hewell Lane
Hewelsfield
Hewelsfield Common
Hewish
Hewton
Hexham
Hextable
Hexton
Hexworthy
Heybridge
Heybridge Basin
Heybrook Bay
Heydon
Heydour
Heylipoll
Heylor
Heysham
Heyshaw
Heyshott
Heyside
Heytesbury
Heythrop
Heywood
Hibaldstow
Hickleton
Hickling
Hickling Green
Hickling Heath
Hickstead
Hidcote Boyce
High Ackworth
High Balantyre
High Barnet
High Beach
High Bentham
High Bickington
High Birkwith
High Blantyre
High Bonnybridge
High Borgue
High Bradfield
High Bray
High Brooms
High Bullen
High Burton
High Buston
High Callerton
High Catton
High Cogges
High Coniscliffe
High Cross
High Cross Bank
High Easter
High Ellington
High Entercommon
High Ercall
High Etherley
High Garrett
High Gate
High Grange
High Green
High Halden
High Halstow
High Ham
High Harrington
High Harrogate
High Hatton
High Hawsker
High Heath
High Hesket
High Holborn
High Hoyland
High Hunsley
High Hurstwood
High Hutton
High Ireby
High Kilburn
High Lane
High Laver
High Legh
High Leven
High Littleton
High Lorton
High Melton
High Newton
High Newton by-the-Sea
High Nibthwaite
High Offley
High Ongar
High Onn
High Risby
High Roding
High Salvington
High Shaw
High Spen
High Street
High Street Green
High Street Kensington
High Throston
High Toynton
High Trewhitt
High Wollaston
High Wray
High Wych
High Wycombe
Higham
Higham Dykes
Higham Ferrers
Higham Gobion
Higham Hill
Higham on the Hill
Higham Wood
Highampton
Highams Park
Highbridge
Highbrook
Highburton
Highbury
Highbury and Islington
Highbury Vale
Highclere
Highcliffe
Higher Ansty
Higher Ashton
Higher Ballam
Higher Blackley
Higher Brixham
Higher Cheriton
Higher Gabwell
Higher Green
Higher Kingcombe
Higher Tale
Higher Thrushgill
Higher Town
Higher Walreddon
Higher Walton
Higher Whatcombe
Higher Whitley
Higher Wych
Highfield
Highfields
Highgate
Highgate Wood
Highgreen Manor
Highlane
Highlaws
Highleadon
Highleigh
Highley
Highmead
Highmoor Cross
Highmoor Hill
Highnam
Highstead
Highsted
Highstreet Green
Hightae
Hightown
Highway
Highweek
Highwood Hill
Highworth
Hilborough
Hilcott
Hilden Park
Hildenborough
Hildersham
Hilderstone
Hilderthorpe
Hilfield
Hilgay
Hill Brow
Hill Chorlton
Hill Dyke
Hill End
Hill Head
Hill of Beath
Hill of Fearn
Hill Ridware
Hill Top
Hill View
Hillam
Hillbeck
Hillberry
Hillborough
Hillbrae
Hillend
Hillesden
Hillesley
Hillfarrance
Hillhead
Hillhead of Auchentumb
Hillhead of Cocklaw
Hilliard's Cross
Hilliclay
Hillingdon
Hillington
Hillmorton
Hillockhead
Hillowton
Hillpound
Hills Town
Hillsford Bridge
Hillside
Hillswick
Hillway
Hillwell
Hilmarton
Hilperton
Hilsea
Hilton
Hilton of Cadboll
Hilton of Delnies
Himbleton
Himley
Hincaster
Hinckley
Hinderclay
Hinderwell
Hindford
Hindhead
Hindley
Hindley Green
Hindlip
Hindolveston
Hindon
Hindringham
Hingham
Hinstock
Hintlesham
Hinton
Hinton Admiral
Hinton Ampner
Hinton Blewett
Hinton Charterhouse
Hinton Martell
Hinton on the Green
Hinton Parva
Hinton St George
Hinton St Mary
Hinton Waldrist
Hinton-in-the-Hedges
Hints
Hinwick
Hinxhill
Hinxton
Hinxworth
Hipperholme
Hirn
Hirnant
Hirst
Hirst Courtney
Hirwaen
Hirwaun
Hiscott
Histon
Hitcham
Hitchin
Hither Green
Hittisleigh
Hixon
Hoaden
Hoaldalbert
Hoar Cross
Hoarwithy
Hoath
Hobarris
Hobbister
Hobbs Lots Bridge
Hobkirk
Hobson
Hoby
Hockering
Hockley
Hockley Heath
Hockliffe
Hockwold cum Wilton
Hockworthy
Hoddesdon
Hoddlesden
Hodgeston
Hodnet
Hodthorpe
Hoe
Hoe Gate
Hoff
Hoffleet Stow
Hoggeston
Hoggie
Hogha Gearraidh
Hoghton
Hognaston
Hogsthorpe
Holbeach
Holbeach Bank
Holbeach Clough
Holbeach Drove
Holbeach Hurn
Holbeach St Johns
Holbeach St Marks
Holbeach St Matthew
Holbeck
Holberrow Green
Holbeton
Holborn
Holborn Viaduct
Holborough
Holbrook
Holburn
Holbury
Holcombe
Holcombe Rogus
Holcot
Holden
Holdenby
Holdenhurst
Holders Hill
Holdgate
Holdingham
Holditch
Hole Park
Hole Street
Hole-in-the-Wall
Holford
Holgate
Holker
Holkham
Hollacombe
Holland
Holland Park
Holland-on-Sea
Hollandstoun
Hollee
Hollesley
Hollingbourne
Hollingbury
Hollington
Hollingworth
Hollins
Hollins Green
Hollinsclough
Hollinswood
Hollinwood
Hollocombe
Holloway
Holloway Road
Hollowell
Holly End
Holly Green
Hollybush
Hollym
Hollywood
Holm
Holmbury St Mary
Holmbush
Holme
Holme Chapel
Holme Hale
Holme Lacy
Holme Marsh
Holme next the Sea
Holme on the Wolds
Holme Pierrepont
Holme-on-Spalding-Moor
Holmer
Holmer Green
Holmes Chapel
Holmesfield
Holmeswood
Holmewood
Holmfield
Holmfirth
Holmhead
Holmpton
Holmrook
Holmsgarth
Holmside
Holmston
Holne
Holnest
Holsworthy
Holsworthy Beacon
Holt
Holt End
Holt Fleet
Holt Heath
Holtby
Holton
Holton Heath
Holton le Clay
Holton le Moor
Holton St Mary
Holtspur
Holtye Common
Holwell
Holwick
Holworth
Holy Cross
Holybourne
Holyhead
Holymoorside
Holyport
Holystone
Holytown
Holywell
Holywell Green
Holywell Lake
Holywell Row
Holywood
Hom Green
Homer
Homersfield
Homerton
Homington
Honey Hill
Honey Tye
Honeyborough
Honeybourne
Honeychurch
Honiley
Honing
Honingham
Honington
Honiton
Honley
Honor Oak
Honor Oak Park
Hoo
Hooe
Hooe Common
Hook
Hook Green
Hook Norton
Hook-a-Gate
Hooke
Hookgate
Hookway
Hookwood
Hoole
Hooley
Hooton
Hooton Levitt
Hooton Pagnell
Hooton Roberts
Hopcrofts Holt
Hope
Hope Bagot
Hope Bowdler
Hope End Green
Hope Mansell
Hope under Dinmore
Hope's Green
Hopehouse
Hopeman
Hopesay
Hopkinstown
Hopton
Hopton Cangeford
Hopton Castle
Hopton Wafers
Hoptonheath
Hopwas
Hopwood
Horam
Horbling
Horbury
Horden
Horderley
Hordle
Hordley
Horeb
Horfield
Horham
Horkesley Heath
Horkstow
Horley
Horn Hill
Hornblotton Green
Hornby
Horncastle
Hornchurch
Horncliffe
Horndean
Horndon
Horndon on the Hill
Horne
Horniehaugh
Horniman Museum
Horning
Horninghold
Horninglow
Horningsea
Horningsham
Horningtoft
Horningtops
Horns Cross
Hornsby
Hornsea
Hornsey
Hornsey Lane
Hornsey Rise
Hornsey Vale
Hornton
Horrabridge
Horridge
Horringer
Horse Bridge
Horsebridge
Horsebrook
Horseferry Road
Horsehay
Horseheath
Horsehouse
Horsell
Horseman's Green
Horseway
Horsey
Horsford
Horsforth
Horsham
Horsham St Faith
Horsington
Horsley
Horsley Cross
Horsley Woodhouse
Horsleycross Street
Horsmonden
Horspath
Horstead
Horsted Keynes
Horton
Horton Cross
Horton Green
Horton Heath
Horton in Ribblesdale
Horton Kirby
Horton-cum-Studley
Horwich
Horwich End
Horwood
Hose
Hosh
Hosta
Hoswick
Hotham
Hothfield
Hoton
Houbie
Hough
Hough Green
Hough-on-the-Hill
Hougham
Houghton
Houghton Bank
Houghton Conquest
Houghton le Spring
Houghton on the Hill
Houghton Regis
Houghton St Giles
Houghton-le-Side
Houlsyke
Hound
Hound Green
Houndslow
Houndwood
Hounsdown
Hounslow
Hounslow Central
Hounslow East
Hounslow Green
Hounslow West
Househill
Housetter
Houston
Houstry
Houstry of Dunn
Houton
Hove
Hoveringham
Hoveton
Hovingham
How Caple
How End
Howden
Howden-le-Wear
Howe
Howe Green
Howe of Teuchar
Howe Street
Howell
Howey
Howgate
Howgill
Howick
Howle
Howlett End
Howley
Hownam
Howpasley
Howsham
Howtel
Howton
Howwood
Hoxa
Hoxne
Hoxton
Hoylake
Hoyland
Hoyland Swaine
Hubberholme
Hubbert's Bridge
Huby
Hucclecote
Hucking
Hucknall
Huddersfield
Huddington
Hudscott
Hudswell
Huggate
Hugglescote
Hugh Town
Hughenden Valley
Hughley
Hugmore
Huish
Huish Champflower
Huish Episcopi
Huisinis
Hulcott
Hulland
Hullavington
Hullbridge
Hulme End
Hulme Walfield
Hulver Street
Humber Court
Humberston
Humberstone
Humbie
Humbleton
Humby
Hume
Humehall
Humshaugh
Huna
Huncoat
Huncote
Hundalee
Hunderthwaite
Hundleby
Hundleton
Hundon
Hundred Acres
Hundred End
Hundred House
Hungarton
Hungerford
Hungerford Newtown
Hunglader
Hunmanby
Hunningham
Hunny Hill
Hunsdon
Hunsingore
Hunsonby
Hunspow
Hunstanton
Hunstanworth
Hunston
Hunstrete
Hunt End
Hunt House
Hunt's Cross
Hunter's Quay
Hunters Forstal
Hunterston
Huntford
Huntingdon
Huntingfield
Huntingford
Huntington
Huntingtower
Huntley
Huntly
Huntlywood
Hunton
Huntonbridge
Huntsham
Huntshaw Cross
Huntspill
Huntworth
Hunwick
Hunworth
Hurdsfield
Hurley
Hurley Bottom
Hurlford
Hurliness
Hurn
Hursley
Hurst
Hurst Green
Hurstbourne Priors
Hurstbourne Tarrant
Hurstpierpoint
Hurstway Common
Hurstwood
Hurtmore
Hurworth-on-Tees
Hury
Husabost
Husbands Bosworth
Husborne Crawley
Husthwaite
Huthwaite
Huttoft
Hutton
Hutton Bonville
Hutton Buscel
Hutton Conyers
Hutton Cranswick
Hutton End
Hutton Henry
Hutton Magna
Hutton Roof
Hutton Rudby
Hutton Sessay
Hutton Wandesley
Hutton-le-Hole
Huxley
Huxter
Huyton
Hycemoor
Hyde
Hyde Heath
Hyde Lea
Hyde Park
Hyde Park Corner
Hydestile
Hyndford Bridge
Hyndlee
Hynish
Hyssington
Hythe
Hythe End
Hythie
Hyton
Ianstown
Ibberton
Ible
Ibsley
Ibstock
Ibstone
Ibthorpe
Ibworth
Icelton
Ickburgh
Ickenham
Ickford
Ickham
Ickleford
Icklesham
Ickleton
Icklingham
Ickwell Green
Icomb
Idbury
Iddesleigh
Ide
Ide Hill
Ideford
Iden
Iden Green
Idlicote
Idmiston
Idridgehay
Idrigil
Idstone
Idvies
Iffley
Ifield
Ifieldwood
Ifold
Iford
Ifton Heath
Ightfield
Ightham
Iken
Ilam
Ilchester
Ilderton
Ilford
Ilfracombe
Ilkeston
Ilketshall St Andrew
Ilketshall St Lawrence
Ilketshall St Margaret
Ilkley
Illey
Illington
Illingworth
Illogan
Illston on the Hill
Ilmer
Ilmington
Ilminster
Ilsington
Ilston
Ilton
Imachar
Immeroin
Immingham
Immingham Dock
Impington
Ince
Ince Blundell
Ince-in-Makerfield
Inch
Inchbare
Inchberry
Inchbraoch
Inchgrundle
Inchindown
Inchinnan
Inchkinloch
Inchlaggan
Inchlumpie
Inchmarlo
Inchnabobart
Inchnadamph
Inchock
Inchrory
Inchture
Inchyra
Indian Queens
Inerval
Ingatestone
Ingbirchworth
Ingerthorpe
Ingestre
Ingleby
Ingleby Arncliffe
Ingleby Cross
Ingleby Greenhow
Inglesbatch
Inglesham
Ingleton
Inglewhite
Ingmire Hall
Ingoe
Ingoldisthorpe
Ingoldmells
Ingoldsby
Ingon
Ingrave
Ingrow
Ings
Ingst
Ingworth
Inistrynich
Injebreck
Inkberrow
Inkhorn
Inkpen
Inkstack
Innellan
Innergellie
Innerleithen
Innerleven
Innermessan
Innerwick
Inninbeg
Innsworth
Insch
Insh
Inshore
Inskip
Instow
Intwood
Inver
Inver Mallie
Inverailort
Inveralligan
Inverallochy
Inveran
Inveraray
Inverardoch Mains
Inverardran
Inverarish
Inverarity
Inverarnan
Inverasdale
Inverbain
Inverbeg
Inverbervie
Inverbroom
Inverbrough
Invercassley
Inverchaolain
Invercharnan
Inverchorachan
Inverchoran
Invercreran
Inverdruie
Inverebrie
Invereen
Invererne
Inveresk
Inverey
Inverfarigaig
Invergarry
Invergelder
Invergeldie
Invergloy
Invergordon
Invergowrie
Inverguseran
Inverhadden
Inverharroch
Inverherive
Inverhope
Inverie
Inverinan
Inverinate
Inverkeilor
Inverkeithing
Inverkeithny
Inverkip
Inverkirkaig
Inverlael
Inverlauren
Inverliever
Inverliver
Inverlochlarig
Inverlochy
Inverlussa
Invermoriston
Invernaver
Inverneil
Inverness
Invernettie
Invernoaden
Inveroran Hotel
Inverquharity
Inverquhomery
Inverroy
Invershiel
Inversnaid Hotel
Invertrossachs
Inverugie
Inveruglas
Inveruglass
Inverurie
Invervar
Invervegain
Inverythan
Inwardleigh
Inworth
Iochda
Iping
Ipplepen
Ipsden
Ipstones
Ipswich
Irby
Irby in the Marsh
Irby upon Humber
Irchester
Ireby
Ireland
Ireleth
Ireshopeburn
Irlam
Irnham
Iron Acton
Iron Cross
Ironbridge
Ironside
Ironville
Irstead
Irthington
Irthlingborough
Irton
Irvine
Isauld
Isbister
Isfield
Isham
Island Gardens
Islay Ho.
Isle Abbotts
Isle Brewers
Isle of Whithorn
Isleham
Islesburgh
Isleworth
Isley Walton
Islibhig
Islington
Islip
Isombridge
Istead Rise
Itchen
Itchen Abbas
Itchen Stoke
Itchingfield
Itchington
Itteringham
Itton
Itton Common
Ivegill
Ivelet
Iver
Iver Heath
Iveston
Ivinghoe
Ivinghoe Aston
Ivington
Ivington Green
Ivy Hatch
Ivy Todd
Ivybridge
Ivychurch
Iwade
Iwerne Courtney or Shroton
Iwerne Minster
Ixworth
Ixworth Thorpe
Jack Hill
Jackstown
Jackton
Jacobstow
Jacobstowe
Jameston
Jamestown
Janefield
Janetstown
Jarrow
Jarvis Brook
Jasper's Green
Jawcraig
Jayes Park
Jaywick
Jedburgh
Jeffreyston
Jemimaville
Jersay
Jerviswood
Jesmond
Jevington
Jodrell Bank
John o'Groats
John's Cross
Johnby
Johnshaven
Johnston
Johnston Mains
Johnstone
Johnstone Castle
Johnstonebridge
Johnstown
Joppa
Jordans
Jordanston
Jordanstone
Jump
Juniper Green
Jurby East
Jurby West
Kaber
Kaimes
Kalnakill
Kames
Kea
Keadby
Keal Cotes
Kearsley
Kearstwick
Kearton
Kearvaig
Keasden
Kebholes
Keckwick
Keddington
Kedington
Kedleston
Keelby
Keele
Keeley Green
Keeres Green
Keeston
Keevil
Kegworth
Kehelland
Keig
Keighley
Keil
Keilhill
Keillmore
Keillor
Keillour
Keills
Keils
Keinton Mandeville
Keir
Keir Mill
Keisby
Keisley
Keiss
Keith
Keithick
Keithmore
Keithock
Kelbrook
Kelby
Keld
Keldholme
Keldy Castle
Kelfield
Kelham
Kellan
Kellas
Kellaton
Kelleth
Kelleythorpe
Kelling
Kellington
Kelloe
Kelloholm
Kelly
Kelly Bray
Kelmarsh
Kelmscott
Kelsale
Kelsall
Kelsay
Kelshall
Kelsick
Kelso
Kelstedge
Kelstern
Kelston
Keltneyburn
Kelton
Kelty
Kelvedon
Kelvedon Hatch
Kelynack
Kemback
Kemberton
Kemble
Kemerton
Kemeys Commander
Kemeys Inferior
Kemnay
Kemp Town
Kempley
Kempley Green
Kempsey
Kempsford
Kempshott
Kempston
Kempston Hardwick
Kempton
Kemsing
Kemsley
Kenardington
Kenchester
Kencott
Kendal
Kenderchurch
Kenfig
Kenfig Hill
Kenilworth
Kenknock
Kenley
Kenmore
Kenn
Kennacraig
Kennards House
Kennavay
Kennerleigh
Kennerty
Kennet
Kennethmont
Kennett
Kennford
Kenninghall
Kennington
Kennoway
Kennyhill
Kennythorpe
Kensal Green
Kensal Rise
Kensal Town
Kensaleyre
Kensington
Kensington & Chelsea
Kensington Gore
Kensworth
Kensworth Common
Kent Street
Kent's Green
Kent's Oak
Kentallen
Kentchurch
Kentford
Kentisbeare
Kentisbury
Kentisbury Ford
Kentish Town
Kentmere
Kenton
Kentra
Kents Bank
Kenwick
Kenwood House
Kenwyn
Kenyon
Keoldale
Keppanach
Keppoch
Kepwick
Keresley
Kerne Bridge
Kerridge
Kerris
Kerry
Kerry's Gate
Kerrycroy
Kerrysdale
Kersall
Kersey
Kershopefoot
Kerswell
Kerswell Green
Kesgrave
Kessingland
Kessingland Beach
Kestle Mill
Keston
Keswick
Ketsby
Kettering
Ketteringham
Kettins
Kettlebaston
Kettlebridge
Kettlebrook
Kettleburgh
Kettleholm
Kettleness
Kettleshulme
Kettlesing
Kettlesing Bottom
Kettlestone
Kettlethorpe
Kettletoft
Kettlewell
Ketton
Kew
Kew Gardens
Kewstoke
Kexbrough
Kexby
Key Green
Key's Toft
Keyham
Keyhaven
Keyingham
Keymer
Keynsham
Keysoe
Keysoe Row
Keyston
Keyworth
Kibblesworth
Kibworth Beauchamp
Kibworth Harcourt
Kidbrooke
Kiddal Lane End
Kiddemore Green
Kidderminster
Kiddington
Kidlington
Kidmore End
Kidsdale
Kidsgrove
Kidstones
Kidwelly
Kiel Crofts
Kielder
Kilbarchan
Kilbeg
Kilberry
Kilbirnie
Kilblaan
Kilbraur
Kilbrenan
Kilbride
Kilbridemore
Kilburn
Kilburn Park
Kilby
Kilcadzow
Kilchattan
Kilchenzie
Kilcheran
Kilchiaran
Kilchoan
Kilchoman
Kilchrenan
Kilchrist
Kilconquhar
Kilcot
Kilcoy
Kilcreggan
Kildale
Kildary
Kildonan
Kildonan Lodge
Kildonnan
Kildrochet
Kildrummy
Kildwick
Kilfinan
Kilfinnan
Kilgetty
Kilgwrrwg Common
Kilham
Kilkenneth
Kilkenny
Kilkerran
Kilkhampton
Killamarsh
Killay
Killean
Killearn
Killellan
Killen
Killerby
Killichonan
Killichronan
Killiechanate
Killiecrankie
Killiehuntly
Killilan
Killimster
Killin
Killinallan
Killinghall
Killington
Killingworth
Killochyett
Killocraw
Killundine
Kilmacolm
Kilmaha
Kilmahog
Kilmalieu
Kilmaluag
Kilmany
Kilmarie
Kilmarnock
Kilmartin
Kilmaurs
Kilmelford
Kilmersdon
Kilmeston
Kilmichael
Kilmichael Glassary
Kilmichael of Inverlussa
Kilmington
Kilmington Street
Kilmorack
Kilmore
Kilmory
Kilmote
Kilmuir
Kilmun
Kilmux
Kiln Green
Kiln Pit Hill
Kilnave
Kilndown
Kilnhurst
Kilninian
Kilninver
Kilnsea
Kilnsey
Kilnwick
Kiloran
Kilpatrick
Kilpeck
Kilphedir
Kilpin
Kilrenny
Kilsby
Kilspindie
Kilstay
Kilsyth
Kiltarlity
Kilton
Kiltyre
Kilvaxter
Kilve
Kilverstone
Kilvington
Kilwinning
Kimberley
Kimble Wick
Kimblesworth
Kimbolton
Kimcote
Kimmeridge
Kimmerston
Kimpton
Kinaldy
Kinblethmont
Kinbrace
Kinbuck
Kincaldrum
Kincaple
Kincardine
Kincardine O'Neil
Kinclaven
Kincorth
Kincraig
Kincraigie
Kindallachan
Kindrogan Field Centre
Kinellar
Kineton
Kineton Green
Kinfauns
King Sterndale
King's Bromley
King's Cliffe
King's Coughton
King's Cross
King's Green
King's Heath
King's Hill
King's Lynn
King's Newton
King's Norton
King's Nympton
King's Pyon
King's Somborne
King's Stag
King's Stanley
King's Sutton
King's Walden
King's Worthy
Kingarth
Kingcoed
Kingerby
Kingham
Kingholm Quay
Kinghorn
Kinglassie
Kingoodie
Kings Caple
Kings Heanton
Kings Langley
Kings Meaburn
Kings Muir
Kings Ripton
Kingsand
Kingsbarns
Kingsbridge
Kingsburgh
Kingsbury
Kingsbury Episcopi
Kingscavil
Kingsclere
Kingscote
Kingscott
Kingscross
Kingsdale
Kingsdon
Kingsdown
Kingseat
Kingsey
Kingsfold
Kingsford
Kingsforth
Kingsgate
Kingshouse
Kingshouse Hotel
Kingskerswell
Kingskettle
Kingsland
Kingsley
Kingsley Green
Kingsmuir
Kingsnorth
Kingsnorth Power Station
Kingstanding
Kingsteignton
Kingsteps
Kingsthorne
Kingsthorpe
Kingston
Kingston Bagpuize
Kingston Blount
Kingston by Sea
Kingston Deverill
Kingston Lisle
Kingston near Lewes
Kingston on Soar
Kingston Park
Kingston Russell
Kingston Seymour
Kingston St Mary
Kingston upon Hull
Kingston upon Thames
Kingstone
Kingstown
Kingswear
Kingswell
Kingswells
Kingswinford
Kingswood
Kingswood Common
Kingthorpe
Kington
Kington Langley
Kington Magna
Kington St Michael
Kingussie
Kingweston
Kinharrachie
Kinharvie
Kinkell
Kinkell Bridge
Kinknockie
Kinlet
Kinloch
Kinloch Hourn
Kinloch Laggan
Kinloch Rannoch
Kinlochan
Kinlochard
Kinlochbervie
Kinlocheil
Kinlochewe
Kinlochlaich
Kinlochleven
Kinlochmoidart
Kinlochmorar
Kinlochmore
Kinloss
Kinmel Bay
Kinmuck
Kinnadie
Kinnaird
Kinneff
Kinnelhead
Kinnell
Kinnerley
Kinnersley
Kinnerton
Kinnesswood
Kinnettles
Kinninvie
Kinnordy
Kinoulton
Kinrara
Kinross
Kinrossie
Kinsbourne Green
Kinsham
Kinsley
Kinson
Kintarvie
Kintbury
Kintessack
Kintillo
Kintocher
Kinton
Kintore
Kintour
Kintra
Kintradwell
Kintraw
Kinuachdrach
Kinveachy
Kinver
Kiplaw Croft
Kiplin
Kipp
Kippax
Kippen
Kippenross Ho
Kippford or Scaur
Kipping's Cross
Kirbister
Kirbuster
Kirby Bedon
Kirby Cane
Kirby Corner
Kirby Cross
Kirby Grindalythe
Kirby Hill
Kirby Knowle
Kirby le Soken
Kirby Misperton
Kirby Muxloe
Kirby Row
Kirby Sigston
Kirby Underdale
Kirby Wiske
Kirdford
Kirk
Kirk Bramwith
Kirk Deighton
Kirk Ella
Kirk Hallam
Kirk Hammerton
Kirk Ireton
Kirk Langley
Kirk Merrington
Kirk Michael
Kirk of Shotts
Kirk Sandall
Kirk Smeaton
Kirk Yetholm
Kirkabister
Kirkandrews
Kirkandrews-upon-Eden
Kirkbampton
Kirkbean
Kirkbride
Kirkbridge
Kirkbuddo
Kirkburn
Kirkburton
Kirkby
Kirkby Bellars
Kirkby Fleetham
Kirkby Green
Kirkby in Ashfield
Kirkby la Thorpe
Kirkby Lonsdale
Kirkby Malham
Kirkby Mallory
Kirkby Malzeard
Kirkby Mills
Kirkby on Bain
Kirkby Overblow
Kirkby Stephen
Kirkby Thore
Kirkby Underwood
Kirkby Wharfe
Kirkbymoorside
Kirkcaldy
Kirkcambeck
Kirkcolm
Kirkconnel
Kirkconnell
Kirkcowan
Kirkcudbright
Kirkdale
Kirkdean
Kirkfieldbank
Kirkgunzeon
Kirkham
Kirkhamgate
Kirkharle
Kirkhaugh
Kirkheaton
Kirkhill
Kirkhope
Kirkibost
Kirkinch
Kirkinner
Kirkintilloch
Kirkland
Kirkland of Longcastle
Kirkleatham
Kirklevington
Kirkley
Kirklington
Kirklinton
Kirkliston
Kirkmaiden
Kirkmichael
Kirkmuirhill
Kirknewton
Kirkney
Kirkoswald
Kirkpatrick Durham
Kirkpatrick-Fleming
Kirksanton
Kirkstall
Kirkstead
Kirkstile
Kirkton
Kirkton Manor
Kirkton of Airlie
Kirkton of Auchterhouse
Kirkton of Barevan
Kirkton of Bourtie
Kirkton of Collace
Kirkton of Craig
Kirkton of Culsalmond
Kirkton of Durris
Kirkton of Glenbuchat
Kirkton of Glenisla
Kirkton of Kingoldrum
Kirkton of Lethendy
Kirkton of Logie Buchan
Kirkton of Maryculter
Kirkton of Menmuir
Kirkton of Monikie
Kirkton of Skene
Kirkton of Strathmartine
Kirkton of Tealing
Kirktonhill
Kirktown
Kirktown of Alvah
Kirktown of Auchterless
Kirktown of Deskford
Kirktown of Fetteresso
Kirktown of Rayne
Kirktown of Slains
Kirkwall
Kirkwhelpington
Kirmington
Kirmond le Mire
Kirn
Kirriemuir
Kirstead Green
Kirtlebridge
Kirtling
Kirtling Green
Kirtlington
Kirtomy
Kirton
Kirton End
Kirton Holme
Kirton in Lindsey
Kiscadale
Kislingbury
Kismeblon Bridge
Kites Hardwick
Kitley
Kittisford
Kitwood
Kiveton Park
Klibreck
Knabbygates
Knaith
Knap Corner
Knaphill
Knapp
Knapton
Knapton Green
Knapwell
Knaresborough
Knarsdale
Knaven
Knayton
Knebworth
Knedlington
Kneesall
Kneesworth
Kneeton
Knelston
Knettishall
Knightacott
Knightcote
Knighton
Knightsbridge
Knightwick
Knill
Knipoch
Knipton
Knitsley
Kniveton
Knock
Knock of Auchnahannet
Knockalava
Knockally
Knockaloe Moar
Knockan
Knockandhu
Knockando
Knockbain
Knockban
Knockbreck
Knockbrex
Knockdee
Knockdow
Knockdown
Knockenkelly
Knockentiber
Knockfin
Knockgray
Knockholt
Knockholt Pound
Knockholt Station
Knockin
Knocklearn
Knocknaha
Knocknain
Knocknalling
Knockrome
Knocksharry
Knockville
Knockvologan
Knodishall
Knolls Green
Knolton
Knook
Knossington
Knott End-on-Sea
Knotting
Knotting Green
Knottingley
Knotty Ash
Knotty Green
Knowbury
Knowe
Knowes of Elrick
Knowesgate
Knoweside
Knowetownhead
Knowhead
Knowl Green
Knowl Hill
Knowl Wall
Knowle
Knowle Green
Knowle Hall
Knowlton
Knowsley
Knowstone
Knucklas
Knutsford
Knypersley
Kuggar
Kyle of Lochalsh
Kyleakin
Kylerhea
Kylesknoydart
Kylesmorar
Kylestrome
Kyloag
Kynnersley
Kyre Park
Labost
Lacasaigh
Lacasdal
Laceby
Lacey Green
Lach Dennis
Lackford
Lacock
Ladbroke
Ladbroke Grove
Laddingford
Lade Bank
Ladock
Lady Hall
Lady's Green
Ladybank
Ladycross
Ladyfield
Ladykirk
Ladysford
Ladywell
Laga
Lagavulin
Lagg
Laggan
Lagganulva
Lagganvoulin
Laglingarten
Lagnalean
Lagrae
Laguna
Lahill
Laide
Laig
Lainchoil
Laindon
Lair
Lairg
Lairigmor
Laithers
Laithes
Lake
Lakenham
Lakenheath
Lakesend
Lakeside
Laleham
Laleston
Lamancha
Lamarsh
Lamas
Lamb Corner
Lamberhurst
Lamberhurst Quarter
Lamberton
Lambeth
Lambeth North
Lambfell Moar
Lambley
Lambourn
Lambourn Woodlands
Lambourne End
Lambs Green
Lambston
Lamellion
Lamerton
Lamesley
Lamington
Lamlash
Lamloch
Lamonby
Lamorran
Lampeter
Lampeter Velfrey
Lamphey
Lamplugh
Lamport
Lamyatt
Lana
Lanark
Lancaster
Lancaster Gate
Lanchester
Landbeach
Landcross
Landerberry
Landewednack
Landford
Landimore
Landkey
Landore
Landrake
Landscove
Landshipping
Landulph
Landwade
Landywood
Lane End
Lane Green
Lane Head
Lane-end
Laneast
Laneham
Laneshawbridge
Langais
Langamull
Langar
Langbank
Langbar
Langcliffe
Langdale End
Langdon
Langdon Beck
Langdon Hills
Langdon House
Langdyke
Langenhoe
Langford
Langford Budville
Langham
Langham Moor
Langho
Langholm
Langlands
Langlee
Langleeford
Langley
Langley Burrell
Langley Green
Langley Heath
Langley Marsh
Langley Mill
Langley Moor
Langley Park
Langley Street
Langney
Langold
Langore
Langport
Langrick
Langridge
Langridgeford
Langrigg
Langrish
Langriville
Langsett
Langshaw
Langside
Langskaill
Langstone
Langthorne
Langthorpe
Langthwaite
Langtoft
Langton
Langton by Wragby
Langton Green
Langton Herring
Langton Long Blandford
Langton Matravers
Langtree
Langwathby
Langwell
Langworth
Lanivet
Lanlivery
Lanner
Lanreath
Lansallos
Lansdown
Lanteglos
Lanton
Lapford
Laphroaig
Lapley
Lapworth
Larach na Gaibhre
Larachbeg
Larbert
Larden Green
Larg
Largie
Largiemore
Largoward
Largs
Largue
Largybaan
Largybeg
Largymore
Lark Hall
Larkhall
Larkhill
Larling
Larriston
Lartington
Lary
Lasborough
Lasham
Lassington
Lassintullich
Lassodie
Lasswade
Lastingham
Latchford
Latchingdon
Latchley
Lately Common
Lathallan Mill
Lathbury
Latheron
Latheronwheel
Lathockar
Lathones
Lathrisk
Latimer
Latimer Road
Latteridge
Lattiford
Latton
Lauchentyre
Lauchintilly
Lauder
Laugharne
Laughterton
Laughton
Laughton en le Morthen
Launcells
Launcells Cross
Launceston
Launton
Laurencekirk
Laurieston
Lavender Hill
Lavendon
Lavenham
Laverhay
Lavernock
Laversdale
Laverstock
Laverstoke
Laverton
Lavister
Lawers
Lawford
Lawhitton
Lawkland
Lawley
Lawnhead
Lawrenny
Lawshall
Lawton
Laxey
Laxfield
Laxfirth
Laxford Bridge
Laxo
Laxton
Laycock
Layer Breton
Layer de la Haye
Layer Marney
Layham
Laysters Pole
Laytham
Lazenby
Lazonby
Lea
Lea Bridge
Lea Marston
Lea Town
Lea Yeat
Leac a'Li
Leachkin
Leack
Leadburn
Leaden Roding
Leadenham
Leadgate
Leadhills
Leafield
Leagrave
Leake Common Side
Leake Hurn's End
Lealands
Lealholm
Lealt
Leamington Hastings
Leanach
Leanaig
Leanoch
Leargybreck
Leasgill
Leasingham
Leask
Leatherhead
Leathley
Leaton
Leaveland
Leavenheath
Leavening
Leaves Green
Lebberston
Lechlade
Lechuary
Leck
Leck-hampton
Leckford
Leckfurin
Leckgruinart
Leckhampstead
Leckie
Leckmelm
Leckroy
Leckwith
Leconfield
Ledaig
Ledard
Ledburn
Ledbury
Ledcharrie
Ledgemoor
Ledicot
Ledmore
Lednagullin
Ledsham
Ledston
Ledwell
Lee
Lee Brockhurst
Lee Clump
Lee Green
Lee Mill Bridge
Lee Moor
Lee-on-the-Solent
Leebotten
Leebotwood
Leece
Leeds
Leedstown
Leegomery
Leek
Leek Wootton
Leeming
Leeming Bar
Lees
Leeswood
Legars
Legbourne
Legerwood
Legsby
Leicester
Leicester Square
Leideag
Leigh
Leigh Beck
Leigh Common
Leigh Delamere
Leigh Green
Leigh Sinton
Leigh upon Mendip
Leigh Woods
Leigh-on-Sea
Leighterton
Leighton
Leighton Bromswold
Leighton Buzzard
Leinthall Earls
Leinthall Starkes
Leintwardine
Leire
Leirinmore
Leiston
Leitfie
Leith
Leitholm
Lelant
Lelley
Lem Hill
Lemington
Lemnas
Lempitlaw
Lemsford
Lenchwick
Lendalfoot
Lendrick
Lenham
Lenham Heath
Lenie
Lenimore
Lennel
Lennox Plunton
Lennoxtown
Lenton
Lenwade
Lenzie
Leoch
Leochel-Cushnie
Leominster
Leonard Stanley
Leorin
Lepe
Lephinmore
Leppington
Lepton
Lerags
Lerryn
Lerwick
Lesbury
Leschangie
Lescrow
Leslie
Lesmahagow
Lesnes Abbey
Lesnewth
Lessendrum
Lessingham
Lessonhall
Leswalt
Letchmore Heath
Letchworth
Letcombe Bassett
Letcombe Regis
Leth Meadhanach
Letham
Lethanhill
Lethendy
Lethenty
Letheringham
Letheringsett
Lettaford
Letter Finlay
Letterfearn
Lettermorar
Lettermore
Lettershaws
Letterston
Lettoch
Letton
Letty Green
Letwell
Leuchars
Leumrabhagh
Levedale
Leven
Levencorroch
Levenhall
Levens
Levenshulme
Levenwick
Leverington
Leverstock Green
Leverton
Leverton Outgate
Levington
Levisham
Levishie
Lew
Lewannick
Lewdown
Lewes
Leweston
Lewisham
Lewiston
Lewknor
Leworthy
Lewtrenchard
Ley
Ley Green
Leybourne
Leyburn
Leycett
Leyland
Leylodge
Leys
Leys of Cossans
Leysdown-on-Sea
Leysmill
Leyton
Leyton Marshes
Leytonstone
Lezant
Lhanbryde
Libanus
Libberton
Liberton
Liceasto
Lichfield
Lickey
Lickey End
Lickfold
Liddel
Liddesdale
Liddington
Lidgate
Lidlington
Lidsing
Lidstone
Lienassie
Lieurary
Liff
Lifton
Liftondown
Lighthorne
Lightwater
Lightwood
Lightwood Green
Lilbourne
Lilburn Tower
Lilleshall
Lilley
Lilliesleaf
Lillingstone Dayrell
Lillingstone Lovell
Lillington
Lilliput
Lilstock
Limbrick
Limbury
Limefield
Limehillock
Limehouse
Limekilnburn
Limekilns
Limerigg
Limerstone
Limington
Limpenhoe
Limpley Stoke
Limpsfield
Linbriggs
Linby
Linchmere
Lincoln
Lincomb
Lincombe
Lindal in Furness
Lindale
Lindean
Lindertis
Lindfield
Lindford
Lindifferon
Lindley
Lindores
Lindridge
Lindsaig
Lindsell
Lindsey
Linford
Lingague
Lingdale
Lingen
Lingfield
Lingwood
Linhead
Linhope
Linicro
Linkenholt
Linkhill
Linkinhorne
Linklater
Linksness
Linktown
Linley
Linley Green
Linlithgow
Linlithgow Bridge
Linn of Muick Cottage
Linnels
Linney
Linshiels
Linsiadar
Linsidemore
Linslade
Linstead Parva
Linstock
Linthwaite
Lintlaw
Lintmill
Linton
Linton-on-Ouse
Lintzford
Linwood
Lionacleit
Lional
Liphook
Liscombe
Liskeard
Liss
Liss Forest
Lissett
Lissington
Lisson Grove
Liston
Lisvane
Liswerry
Litcham
Litchborough
Litchfield
Litherland
Litlington
Little Abington
Little Addington
Little Alne
Little Amwell
Little Aston
Little Atherfield
Little Ayton
Little Baddow
Little Badminton
Little Ballinluig
Little Bampton
Little Bardfield
Little Barford
Little Barningham
Little Barrington
Little Barugh
Little Bealings
Little Bedwyn
Little Bentley
Little Berkhamsted
Little Billing
Little Birch
Little Bispham
Little Blakenham
Little Bollington
Little Bookham
Little Bowden
Little Bradley
Little Brampton
Little Braxted
Little Brechin
Little Brickhill
Little Bridgeford
Little Brington
Little Bromley
Little Broughton
Little Budworth
Little Burstead
Little Burton
Little Bytham
Little Carlton
Little Casterton
Little Catwick
Little Cawthorpe
Little Chalfont
Little Chart
Little Chesterford
Little Cheverell
Little Chishill
Little Clacton
Little Clifton
Little Comberton
Little Common
Little Compton
Little Corby
Little Cowarne
Little Coxwell
Little Creich
Little Cressingham
Little Crosby
Little Dalby
Little Dens
Little Dewchurch
Little Downham
Little Driffield
Little Dunham
Little Dunkeld
Little Dunmow
Little Easton
Little Eaton
Little Ellingham
Little End
Little Eversden
Little Fakenham
Little Faringdon
Little Fencote
Little Fenton
Little Finborough
Little Fransham
Little Gaddesden
Little Garway
Little Gidding
Little Glemham
Little Gorsley
Little Gransden
Little Green
Little Grimsby
Little Gruinard
Little Habton
Little Hadham
Little Hale
Little Hallingbury
Little Hampden
Little Harrowden
Little Haseley
Little Hautbois
Little Haven
Little Hay
Little Hayfield
Little Haywood
Little Heath
Little Hereford
Little Holtby
Little Horkesley
Little Hormead
Little Horsted
Little Horwood
Little Houghton
Little Hucklow
Little Hulton
Little Hungerford
Little Idoch
Little Ilford
Little Kimble
Little Kineton
Little Kingshill
Little Langford
Little Laver
Little Lawford
Little Leigh
Little Leighs
Little Lever
Little Ley
Little Linford
Little London
Little Longstone
Little Malvern
Little Maplestead
Little Marcle
Little Marlow
Little Massingham
Little Melton
Little Mill
Little Milton
Little Missenden
Little Musgrave
Little Ness
Little Neston
Little Newcastle
Little Newsham
Little Oakley
Little Orton
Little Ouseburn
Little Parndon
Little Paxton
Little Petherick
Little Plumstead
Little Ponton
Little Raveley
Little Ribston
Little Rissington
Little Rogart
Little Ryburgh
Little Salkeld
Little Sampford
Little Saxham
Little Scatwell
Little Shelford
Little Smeaton
Little Snoring
Little Sodbury
Little Somborne
Little Somerford
Little Stainton
Little Stanney
Little Staughton
Little Steeping
Little Stonham
Little Stretton
Little Strickland
Little Stukeley
Little Sutton
Little Tew
Little Tey
Little Thetford
Little Thirkleby
Little Thorpe
Little Thurlow
Little Thurrock
Little Torboll
Little Torrington
Little Totham
Little Town
Little Urswick
Little Wakering
Little Walden
Little Waldingfield
Little Walsingham
Little Waltham
Little Warley
Little Weighton
Little Welland
Little Welnetham
Little Wenham
Little Wenlock
Little Whittingham Green
Little Whittington
Little Wilbraham
Little Witcombe
Little Witley
Little Wittenham
Little Wolford
Little Woolstone
Little Wratting
Little Wymondley
Little Wyrley
Little Yeldham
Little-dean
Littlebeck
Littleborough
Littlebourne
Littlebredy
Littlebury
Littlebury Green
Littleferry
Littleham
Littlehampton
Littlehempston
Littlehoughton
Littlemill
Littlemore
Littleover
Littleport
Littlestone-on-Sea
Littlethorpe
Littleton
Littleton Drew
Littleton Panell
Littleton-on-Severn
Littletown
Littlewick Green
Littleworth
Littley Green
Litton
Litton Cheney
Liurbost
Liverpool
Liverpool Street
Liversedge
Liverton
Liverton Street
Livingston
Livingston Village
Lixwm
Lizard
Llaingoch
Llaithddu
Llan
Llan-dafel
Llan-y-pwll
Llanaber
Llanaelhaearn
Llanafan
Llanafan-fawr
Llanafan-fechan
Llanallgo
Llanarmon
Llanarmon Dyffryn Ceiriog
Llanarmon-yn-lal
Llanarth
Llanarthney
Llanasa
Llanbadarn Fawr
Llanbadarn Fynydd
Llanbadarn-y-garreg
Llanbadoc
Llanbadrig
Llanbeder
Llanbedr
Llanbedr-Dyffryn-Clwyd
Llanbedr-y-cennin
Llanbedrgoch
Llanbedrog
Llanberis
Llanbethery
Llanbister
Llanblethian
Llanboidy
Llanbradach
Llanbrynmair
Llancarfan
Llancayo
Llancynfelyn
Llandaff
Llandaff North
Llandanwg
Llandawke
Llanddaniel Fab
Llanddarog
Llanddeiniol
Llanddeiniolen
Llandderfel
Llanddeusant
Llanddew
Llanddewi
Llanddewi Rhydderch
Llanddewi Velfrey
Llanddewi Ystradenni
Llanddewi'r Cwm
Llanddewi-Brefi
Llanddoged
Llanddona
Llanddowror
Llanddulas
Llanddwywe
Llanddyfnan
Llandefaelog
Llandefaelog Fach
Llandefaelog-tre'r-graig
Llandefalle
Llandegfan
Llandegla
Llandegley
Llandegveth
Llandegwning
Llandeilo
Llandeilo Abercywyn
Llandeilo Graban
Llandeilo'r-Fan
Llandeloy
Llandenny
Llandevenny
Llandinabo
Llandinam
Llandissilio
Llandogo
Llandough
Llandovery
Llandow
Llandre
Llandrillo
Llandrillo-yn-Rhos
Llandrindod Wells
Llandrinio
Llandudno
Llandudno Junction
Llandwrog
Llandybie
Llandyfriog
Llandyfrydog
Llandygai
Llandygwydd
Llandyrnog
Llandyry
Llandysilio
Llandyssil
Llandysul
Llanedeyrn
Llanegryn
Llanegwad
Llaneilian
Llanelian-yn-Rhos
Llanelidan
Llanelieu
Llanellen
Llanelli
Llanelltyd
Llanelly
Llanelwedd
Llanenddwyn
Llanengan
Llanerchymedd
Llanerfyl
Llanfachraeth
Llanfachreth
Llanfaelog
Llanfaelrhys
Llanfaes
Llanfaethlu
Llanfaglan
Llanfair
Llanfair Caereinion
Llanfair Clydogau
Llanfair Dyffryn Clwyd
Llanfair Talhaiarn
Llanfair Waterdine
Llanfair-Nant-Gwyn
Llanfair-Orllwyn
Llanfair-yn-Neubwll
Llanfairfechan
Llanfairpwllgwyngyll
Llanfairynghornwy
Llanfallteg
Llanfallteg West
Llanfaredd
Llanfarian
Llanfechain
Llanfechell
Llanfendigaid
Llanferres
Llanfflewyn
Llanfigael
Llanfihangel Crucorney
Llanfihangel Glyn Myfyr
Llanfihangel Nant Bran
Llanfihangel Rhydithon
Llanfihangel Rogiet
Llanfihangel uwch-gwili
Llanfihangel-ar-Arth
Llanfihangel-nant-Melan
Llanfihangel-Tal-y-llyn
Llanfihangel-y-Creuddyn
Llanfihangel-y-pennant
Llanfihangel-yng-Ngwynfa
Llanfilo
Llanfoist
Llanfor
Llanfrechfa
Llanfrothen
Llanfrynach
Llanfwrog
Llanfyllin
Llanfynydd
Llanfyrnach
Llangadfan
Llangadog
Llangadwaladr
Llangaffo
Llangain
Llangammarch Wells
Llangan
Llangarron
Llangasty-Talyllyn
Llangathen
Llangattock
Llangattock Lingoed
Llangattock-Vibon-Avel
Llangedwyn
Llangefni
Llangeinor
Llangeitho
Llangeler
Llangelynin
Llangendeirne
Llangennech
Llangennith
Llangenny
Llangernyw
Llangian
Llangiwg
Llanglydwen
Llangoed
Llangoedmor
Llangollen
Llangolman
Llangorse
Llangorwen
Llangovan
Llangranog
Llangristiolus
Llangrove
Llangua
Llangunllo
Llangunnor
Llangurig
Llangwm
Llangwm-isaf
Llangwnnadl
Llangwyfan
Llangwyllog
Llangwyryfon
Llangybi
Llangyfelach
Llangynhafal
Llangynidr
Llangynin
Llangynog
Llangynwyd
Llangywer
Llanhamlach
Llanharan
Llanharry
Llanhennock
Llanhilleth
Llanidloes
Llaniestyn
Llanigon
Llanilar
Llanilid
Llanishen
Llanllawddog
Llanllechid
Llanlleonfel
Llanllugan
Llanllwch
Llanllwchaiarn
Llanllwni
Llanllyfni
Llanllywel
Llanmadoc
Llanmaes
Llanmartin
Llanmerewig
Llanmihangel
Llanmiloe
Llanmorlais
Llannefydd
Llannerch
Llannerch-y-mor
Llannon
Llannor
Llanon
Llanover
Llanpumsaint
Llanreithan
Llanrhaeadr
Llanrhaeadr-ym-Mochnant
Llanrhian
Llanrhidian
Llanrhos
Llanrhyddlad
Llanrhystud
Llanrothal
Llanrug
Llanrumney
Llanrwst
Llansadurnen
Llansadwrn
Llansaint
Llansamlet
Llansanffraid Glan Conwy
Llansannan
Llansannor
Llansantffraed
Llansantffraed-Cwmdeuddwr
Llansantffraed-in-Elvel
Llansantffraid
Llansantffraid-ym-Mechain
Llansawel
Llansilin
Llansoy
Llanspyddid
Llanstadwell
Llanstephan
Llantarnam
Llanteg
Llanthony
Llantilio Crossenny
Llantilio Pertholey
Llantood
Llantrisant
Llantrithyd
Llantwit Fardre
Llantwit Major
Llantysilio
Llanuwchllyn
Llanvaches
Llanvair-Discoed
Llanvapley
Llanvetherine
Llanveynoe
Llanvihangel Gobion
Llanvihangel-Ystern-Llewern
Llanwarne
Llanwddyn
Llanwenog
Llanwern
Llanwinio
Llanwnda
Llanwnen
Llanwnog
Llanwonno
Llanwrda
Llanwrin
Llanwrthwl
Llanwrtyd
Llanwrtyd Wells
Llanwyddelan
Llanyblodwel
Llanybri
Llanybydder
Llanycefn
Llanychaer Bridge
Llanycil
Llanycrwys
Llanymawddwy
Llanymynech
Llanynghenedl
Llanynys
Llanyre
Llanystumdwy
Llanywern
Llawhaden
Llawnt
Llawr-y-dref
Llawryglyn
Llay
Llechcynfarwy
Llechfaen
Llechryd
Lledrod
Llethr
Llidiadnenog
Llidiardau
Llithfaen
Lloc
Llong
Llowes
Lloyney
Llwydcoed
Llwydiarth
Llwyn
Llwyn-Madoc
Llwyn-onn
Llwyn-y-brain
Llwyncelyn
Llwyndafydd
Llwynderw
Llwyndyrys
Llwyngwril
Llwynhendy
Llwynmawr
Llwynypia
Llynclys
Llynfaes
Llys-y-fran
Llysfaen
Llyswen
Llysworney
Llywel
Loandhu
Loanhead
Loans
Loch Coire Lodge
Loch Eil Centre
Loch Head
Loch Sgioport
Lochailort
Lochaline
Lochans
Locharbriggs
Lochawe
Lochboisdale
Lochbuie
Lochcarron
Lochdon
Lochearnhead
Lochee
Lochend
Lochfoot
Lochgair
Lochgarthside
Lochgelly
Lochgilphead
Lochgoilhead
Lochhill
Lochinver
Lochlair
Lochlane
Lochlea
Lochluichart
Lochmaben
Lochmaddy
Lochore
Lochportain
Lochranza
Lochside
Lochslin
Lochty
Lochuisge
Lochurr
Lochussie
Lochwinnoch
Lockengate
Lockerbie
Lockeridge
Lockerley
Locking
Lockington
Lockleywood
Locks Heath
Locksbottom
Lockton
Loddington
Loddiswell
Loddon
Lode
Loders
Lodsworth
Lofthouse
Loftus
Logan
Loganlea
Loggerheads
Loggie
Logie
Logie Coldstone
Logie Hill
Logie Newton
Logie Pert
Logierait
Login
Lolworth
Lonbain
Londesborough
London Arena
London Beach
London Bridge
London Colney
London Wall
Londonderry
Londonthorpe
Londubh
Lonemore
Long Ashton
Long Bennington
Long Bredy
Long Buckby
Long Clawson
Long Common
Long Compton
Long Crendon
Long Crichel
Long Ditton
Long Downs
Long Drax
Long Duckmanton
Long Eaton
Long Gill
Long Hanborough
Long Itchington
Long Lawford
Long Load
Long Marston
Long Marton
Long Melford
Long Newnton
Long Preston
Long Riston
Long Stratton
Long Street
Long Sutton
Long Thurlow
Long Waste
Long Whatton
Long Wittenham
Longbenton
Longborough
Longbridge
Longbridge Deverill
Longburgh
Longburton
Longcliffe
Longcot
Longcross
Longden
Longdon
Longdon upon Tern
Longdown
Longdrum
Longfield
Longfield Hill
Longfleet
Longford
Longforgan
Longformacus
Longframlington
Longham
Longhill
Longhirst
Longhope
Longhorsley
Longhoughton
Longlane
Longley Green
Longmanhill
Longmoor Camp
Longmorn
Longnewton
Longney
Longniddry
Longnor
Longparish
Longridge
Longridge Towers
Longriggend
Longrock
Longsdon
Longside
Longslow
Longstanton
Longstock
Longstowe
Longstreet
Longthorpe
Longton
Longtown
Longville in the Dale
Longwell Green
Longwick
Longwitton
Longwood
Longworth
Longyester
Lonmore
Loose
Loosegate
Loosley Row
Lopcombe Corner
Lopen
Loppington
Lorbottle
Lorbottle Hall
Lordshill
Lordswood
Lorgill
Lorn
Lornty
Loscoe
Losgaintir
Lossiemouth
Lossit
Lostock Gralam
Lostock Green
Lostock Junction
Lostwithiel
Loth
Lothbeg
Lothersdale
Lothmore
Loudwater
Loughborough
Loughborough Junction
Loughor
Loughton
Lound
Lount
Lour
Louth
Love Clough
Loveacott
Lovedean
Lover
Loversall
Loves Green
Loveston
Lovington
Low Ballivain
Low Bentham
Low Bradfield
Low Bradley
Low Braithwaite
Low Brunton
Low Burnham
Low Burton
Low Catton
Low Coniscliffe
Low Craighead
Low Crosby
Low Dinsdale
Low Eggborough
Low Entercommon
Low Etherley
Low Gate
Low Habberley
Low Ham
Low Hawkser
Low Haygarth
Low Hesket
Low Hesleyhurst
Low Hutton
Low Laithe
Low Leighton
Low Marishes
Low Mill
Low Moor
Low Newton-by-the-Sea
Low Redford
Low Risby
Low Row
Low Street
Low Torry
Low Toynton
Low Waters
Low Wood
Low Worsall
Lowdham
Lower Aisholt
Lower Apperley
Lower Ashton
Lower Assendon
Lower Auchalick
Lower Barewood
Lower Beeding
Lower Benefield
Lower Berry Hill
Lower Bockhampton
Lower Boddington
Lower Boscaswell
Lower Bourne
Lower Brailes
Lower Breakish
Lower Broadheath
Lower Brynamman
Lower Bullingham
Lower Burgate
Lower Cam
Lower Chapel
Lower Chute
Lower Clapton
Lower Darwen
Lower Dean
Lower Dicker
Lower Dinchope
Lower Down
Lower Drift
Lower Dunsforth
Lower Edmonton
Lower Egleton
Lower End
Lower Failand
Lower Farringdon
Lower Freystrop
Lower Froyle
Lower Gabwell
Lower Gledfield
Lower Godney
Lower Green
Lower Green Bank
Lower Halstow
Lower Hardres
Lower Hawthwaite
Lower Hayton
Lower Hergest
Lower Heyford
Lower Higham
Lower Holbrook
Lower Holloway
Lower Hordley
Lower Horsebridge
Lower Killeyan
Lower Kingcombe
Lower Kinnerton
Lower Langford
Lower Largo
Lower Lemington
Lower Lydbrook
Lower Lye
Lower Machen
Lower Maes-coed
Lower Moor
Lower Nazeing
Lower Oakfield
Lower Oddington
Lower Penarth
Lower Penn
Lower Pennington
Lower Peover
Lower Place
Lower Quinton
Lower Seagry
Lower Shelton
Lower Shiplake
Lower Shuckburgh
Lower Slaughter
Lower Stanton St Quintin
Lower Stoke
Lower Stondon
Lower Street
Lower Sundon
Lower Swanwick
Lower Swell
Lower Sydenham
Lower Tean
Lower Thurlton
Lower Thurnham
Lower Town
Lower Tysoe
Lower Upham
Lower Vexford
Lower Wallop
Lower Walton
Lower Weare
Lower Welson
Lower Whitley
Lower Wield
Lower Winchendon
Lower Withington
Lower Woodend
Lower Woodford
Lower Wraxall
Lower Wyche
Lowesby
Lowestoft
Lowestoft End
Loweswater
Lowfield Heath
Lowgill
Lowick
Lownie Moor
Lowsonford
Lowther
Lowthorpe
Lowton
Lowton Common
Loxbeare
Loxhill
Loxhore
Loxley
Loxton
Loxwood
Lubcroy
Lubenham
Lubfearn
Lubmore
Lubreoch
Luccombe
Luccombe Village
Lucker
Luckett
Luckington
Lucklawhill
Luckwell Bridge
Lucton
Ludag
Ludborough
Ludchurch
Luddenden
Luddenham Court
Luddesdown
Luddington
Luddington in the Brook
Ludford
Ludford Magna
Ludford Parva
Ludgate Hill
Ludgershall
Ludgvan
Ludham
Ludlow
Ludney
Ludstock
Ludwell
Ludworth
Luffincott
Luffness
Lugar
Luggiebank
Lugton
Lugwardine
Luib
Luibeilt
Lulham
Lullington
Lulsgate Bottom
Lulsley
Lulworth Camp
Lumb
Lumbutts
Lumby
Lumphanan
Lumphinnans
Lumsdaine
Lumsden
Lunan
Lunanhead
Luncarty
Lund
Lundavra
Lunderton
Lundie
Lundin Links
Lunga
Lunna
Lunning
Lunsford's Cross
Lunt
Luntley
Luppitt
Lupton
Lurgashall
Lusby
Luss
Lussagiven
Lusta
Lustleigh
Luston
Luthermuir
Luthrie
Luton
Lutterworth
Lutton
Luxborough
Luxulyan
Lybster
Lydacott
Lydbury North
Lydcott
Lydd
Lydd-on-Sea
Lydden
Lyddington
Lydeard St Lawrence
Lydford
Lydford-on-Fosse
Lydgate
Lydham
Lydiard Millicent
Lydiate
Lydlinch
Lydney
Lydstep
Lye
Lye Green
Lyford
Lymbridge Green
Lyme Regis
Lyminge
Lymington
Lyminster
Lymm
Lymore
Lympne
Lympsham
Lympstone
Lynaberack
Lynchat
Lyndhurst
Lyndon
Lyne
Lyne of Gorthleck
Lyne of Skene
Lyne Station
Lyneal
Lynegar
Lyneham
Lyneholmeford
Lynemore
Lynemouth
Lyness
Lynford
Lyng
Lynmouth
Lynsted
Lynton
Lyon's Gate
Lyonshall
Lyrabus
Lytchett Matravers
Lytchett Minster
Lyth
Lytham
Lytham St Anne's
Lythe
Lythe Hill
Lythes
Lythmore
Mabe Burnthouse
Mabie
Mablethorpe
Macclesfield
Macclesfield Forest
Macduff
Machan
Machany
Macharioch
Machen
Machrie
Machrihanish
Machrins
Machynlleth
Mackworth
Macmerry
Macterry
Madderty
Maddiston
Madehurst
Madeley
Madeley Heath
Madford
Madingley
Madjeston
Madley
Madresfield
Madron
Maenaddwyn
Maenclochog
Maendy
Maentwrog
Maer
Maerdy
Maes-glas
Maes-Treylow
Maes-y-cwmmer
Maesbrook
Maesbury Marsh
Maesgwynne
Maeshafn
Maesllyn
Maesmynis
Maesteg
Maesybont
Maesycrugiau
Magdalen Laver
Maggieknockater
Magham Down
Maghull
Magor
Maida Hill
Maida Vale
Maiden Bradley
Maiden Law
Maiden Newton
Maiden Wells
Maiden's Green
Maidencombe
Maidenhead
Maidens
Maidenwell
Maidford
Maids' Moreton
Maidstone
Maidwell
Mains of Ardestie
Mains of Balhall
Mains of Ballindarg
Mains of Burgie
Mains of Culsh
Mains of Dillavaird
Mains of Drum
Mains of Dudwick
Mains of Faillie
Mains of Fedderate
Mains of Linton
Mains of Melgund
Mains of Pitfour
Mains of Pittrichie
Mains of Sluie
Mains of Tannachy
Mains of Thornton
Mains of Tig
Mains of Watten
Mainsriddle
Mainstone
Maisemore
Makerstoun
Malacleit
Malborough
Malden
Malden Rushett
Maldon
Malham
Maligar
Mallaig
Mallaigvaig
Malleny Mills
Malletsheugh
Malling
Malltraeth
Mallwyd
Malmesbury
Malmsmead
Malpas
Maltby
Maltby le Marsh
Maltman's Hill
Malton
Malvern Link
Malvern Wells
Mambeg
Mamble
Mamhead
Mamhilad
Manaccan
Manafon
Manais
Manaton
Manby
Mancetter
Manchester
Mancot Royal
Mandally
Manea
Maneight
Manfield
Mangaster
Mangotsfield
Mangurstadh
Mankinholes
Manley
Manmoel
Mannel
Manningford Abbots
Manningford Bohune
Manningford Bruce
Mannings Heath
Mannington
Manningtree
Mannofield
Manor House
Manor Park
Manorbier
Manordeifi
Manordeilo
Manorowen
Mansell Gamage
Mansell Lacy
Mansergh
Mansfield
Mansfield Woodhouse
Mansion House
Mansriggs
Manston
Manswood
Manthorpe
Manton
Manuden
Maperton
Maple Cross
Maplebeck
Mapledurwell
Maplehurst
Mapleton
Mapperley
Mapperton
Mappleborough Green
Mappleton
Mapplewell
Mappowder
Mar Lodge
Marazion
Marble Arch
Marble Hill
Marbury
March
Marcham
Marchamley
Marchington
Marchington Woodlands
Marchwiel
Marchwood
Marcross
Marcus
Marden
Marden Beech
Marden Thorn
Mardy
Mare Green
Marefield
Mareham le Fen
Mareham on the Hill
Maresfield
Marfleet
Marford
Margam
Margaret Marsh
Margaret Roding
Margaretting
Margate
Margnaheglish
Margreig
Marham
Marhamchurch
Marholm
Marian Cwm
Marian-glas
Mariansleigh
Marishader
Maristow
Mark Causeway
Mark Cross
Markbeech
Markby
Markdhu
Market Bosworth
Market Deeping
Market Drayton
Market Harborough
Market Lavington
Market Overton
Market Rasen
Market Stainton
Market Street
Market Warsop
Market Weighton
Market Weston
Markethill
Markfield
Markham
Markinch
Markington
Marks Gate
Marks Tey
Marksbury
Markwell
Markyate
Marlborough
Marldon
Marlesford
Marley Green
Marley Hill
Marlingford
Marloes
Marlow
Marlpit Hill
Marlpool
Marnhull
Marnoch
Marple
Marr
Marrel
Marrick
Marrister
Marros
Marsden
Marsett
Marsh
Marsh Baldon
Marsh Chapel
Marsh Gibbon
Marsh Green
Marsh Lane
Marsh Street
Marshall's Heath
Marshalsea
Marsham
Marshaw
Marshborough
Marshbrook
Marshfield
Marshgate
Marshside
Marshwood
Marske
Marske-by-the-Sea
Marston
Marston Green
Marston Magna
Marston Meysey
Marston Montgomery
Marston Moretaine
Marston on Dove
Marston St Lawrence
Marston Stannett
Marston Trussell
Marstow
Marsworth
Marthall
Martham
Marthig
Martin
Martin Drove End
Martin Hussingtree
Martinhoe
Martinscroft
Martinstown
Martlesham
Martlesham Heath
Martletwy
Martley
Martock
Marton
Marton Abbey
Marton-le-Moor
Martyr Worthy
Martyr's Green
Maruig
Marwick
Marwood
Mary Tavy
Marybank
Maryburgh
Maryfield
Marygold
Maryhill
Marykirk
Marylebone
Marypark
Maryport
Marystow
Maryton
Marywell
Masham
Mashbury
Mastrick
Matching
Matching Green
Matching Tye
Matfen
Matfield
Mathern
Mathon
Mathry
Matlaske
Matlock
Matlock Bank
Matlock Bath
Matson
Matterdale End
Mattersey
Mattingley
Mattishall
Mattishall Burgh
Mauchline
Maud
Maugersbury
Maughold
Mauld
Maulden
Maulds Meaburn
Maunby
Maund Bryan
Maundown
Mautby
Mavesyn Ridware
Mavis Enderby
Maw Green
Mawbray
Mawdesley
Mawdlam
Mawgan
Mawla
Mawnan
Mawnan Smith
Maxey
Maxstoke
Maxton
Maxwellheugh
Maxwelltown
Maxworthy
Maybole
Mayen
Mayfair
Mayfield
Mayford
Mayland
Maylandsea
Maynard's Green
Maypole
Maypole Green
Maywick
Meabhag
Mead End
Meadle
Meadowmill
Meadowtown
Meal Bank
Mealabost
Mealasta
Meals
Mealsgate
Meanley
Mearbeck
Meare
Mearns
Mears Ashby
Measham
Meathop
Meavy
Medbourne
Meddon
Meden Vale
Medmenham
Medomsley
Medstead
Meer End
Meerbrook
Meesden
Meeth
Meggethead
Meidrim
Meifod
Meigle
Meikle Earnock
Meikle Grenach
Meikle Kilmory
Meikle Rahane
Meikle Strath
Meikle Tarty
Meikle Wartle
Meikleour
Meinciau
Meir
Meirheath
Melbost
Melbourn
Melbourne
Melbury
Melbury Abbas
Melbury Bubb
Melbury Osmond
Melbury Sampford
Melby
Melchbourne
Melchet Court
Melcombe Bingham
Melcombe Regis
Meldon
Meldreth
Melfort
Melgarve
Melgum
Meliden
Melin-y-coed
Melin-y-grug
Melin-y-Wig
Melincourt
Melincryddan
Melkinthorpe
Melkridge
Melksham
Melksham Forest
Melldalloch
Melling
Melling Mount
Mellis
Mellon Charles
Mellon Udrigle
Mellor
Mellor Brook
Mells
Melmerby
Melplash
Melrose
Melsetter
Melsonby
Meltham
Melton
Melton Constable
Melton Mowbray
Melton Ross
Meltonby
Melvaig
Melverley
Melverley Green
Melvich
Membury
Memsie
Memus
Menabilly
Menai Bridge
Mendham
Mendlesham
Mendlesham Green
Menethorpe
Menheniot
Menie Ho.
Mennock
Menston
Menstrie
Mentmore
Meoble
Meole Brace
Meon
Meonstoke
Meopham
Meopham Green
Mepal
Meppershall
Merbach
Mercaston
Mere
Mere Brow
Mere Green
Mereworth
Mergie
Meriden
Merkland
Merlin's Bridge
Merridge
Merrifield
Merrington
Merrion
Merriott
Merrivale
Merrow
Merry Hill
Merrymeet
Mersham
Merstham
Merston
Merstone
Merther
Merthyr
Merthyr Cynog
Merthyr Dyfan
Merthyr Mawr
Merthyr Tydfil
Merthyr Vale
Merton
Mervinslaw
Meshaw
Messing
Messingham
Metfield
Metheringham
Methil
Methlem
Methley
Methlick
Methven
Methwold
Methwold Hythe
Mettingham
Metton
Mevagissey
Mexborough
Mey
Meysey Hampton
Miabhag
Miabhig
Mial
Michaelchurch
Michaelchurch Escley
Michaelchurch-on-Arrow
Michaelston-le-Pit
Michaelston-y-Fedw
Michaelstow
Micheldever
Michelmersh
Mickfield
Mickle Trafford
Mickleby
Mickleham
Micklehurst
Mickleover
Micklethwaite
Mickleton
Mickletown
Mickley
Mickley Square
Mid Ardlaw
Mid Beltie
Mid Cairncross
Mid Calder
Mid Clyth
Mid Lavant
Mid Letter
Mid Lix
Mid Mossdale
Mid Sannox
Mid Yell
Midbea
Middle Assendon
Middle Aston
Middle Barton
Middle Claydon
Middle Drums
Middle Handley
Middle Harling
Middle Kames
Middle Littleton
Middle Maes-coed
Middle Mill
Middle Rasen
Middle Rigg
Middle Salter
Middle Tysoe
Middle Wallop
Middle Winterslow
Middle Woodford
Middlebie
Middleham
Middlehill
Middlehope
Middlemarsh
Middlesbrough
Middleshaw
Middlesmoor
Middlestone Moor
Middlestown
Middleton
Middleton Bank Top
Middleton Cheney
Middleton Green
Middleton Hall
Middleton on the Hill
Middleton One Row
Middleton Park
Middleton Priors
Middleton Quernhow
Middleton Scriven
Middleton St George
Middleton Stoney
Middleton Tyas
Middleton-in-Teesdale
Middleton-on-Leven
Middleton-on-Sea
Middleton-on-the-Wolds
Middletown
Middlewich
Middlewood
Middlewood Green
Middleyard
Middlezoy
Middridge
Midfield
Midford
Midge Hall
Midgeholme
Midgham
Midgley
Midhopestones
Midhurst
Midlem
Midpark
Midsomer Norton
Midtown
Midtown of Barras
Midville
Migdale
Migvie
Milarrochy
Milber
Milbethill
Milborne Port
Milborne St Andrew
Milborne Wick
Milbourne
Milburn
Milbury Heath
Milcombe
Milden
Mildenhall
Mile Elm
Mile End
Mile End Road
Milebrook
Milebush
Mileham
Milesmark
Milfield
Milford
Milford Haven
Milford on Sea
Milkwall
Mill Bank
Mill End
Mill End Green
Mill Green
Mill Hill
Mill Hill East
Mill Houses
Mill Lane
Mill of Colp
Mill of Elrick
Mill of Fortune
Mill of Kingoodie
Mill of Monquich
Mill of Uras
Mill Street
Milland Marsh
Millbank
Millbeck
Millbounds
Millbreck
Millbridge
Millbrook
Millburn
Millcombe
Millcorner
Millden
Milldens
Millearn
Millenheath
Miller's Dale
Millerhill
Millholme
Millhouse
Millhousebridge
Millikenpark
Millington
Millmeece
Millness
Millom
Millport
Millthrop
Milltimber
Millton of Noth
Milltown
Milltown of Aberdalgie
Milltown of Auchindown
Milltown of Campfield
Milltown of Craigston
Milltown of Edinvillie
Milltown of Rothiemay
Milltown of Towie
Millwall
Milnathort
Milngavie
Milnrow
Milnsbridge
Milnthorpe
Milovaig
Milson
Milstead
Milston
Milton
Milton Abbas
Milton Abbot
Milton Bridge
Milton Bryan
Milton Clevedon
Milton Coldwells
Milton Combe
Milton Damerel
Milton Ernest
Milton Green
Milton Hill
Milton Inveramsay
Milton Keynes
Milton Keynes Village
Milton Lilbourne
Milton Lockhart
Milton Malsor
Milton Morenish
Milton of Auchinhove
Milton of Balgonie
Milton of Cairnborrow
Milton of Campsie
Milton of Cullerlie
Milton of Cushnie
Milton of Dalcapon
Milton of Tullich
Milton on Stour
Milton Regis
Milton-under-Wychwood
Miltonduff
Miltonhill
Miltonise
Milverton
Milwich
Minard
Minchington
Minchinhampton
Mindrum
Minehead
Minera
Minety
Minffordd
Mingearraidh
Miningsby
Minions
Minishant
Minley Manor
Minllyn
Minnes
Minnigaff
Minnonie
Minskip
Minstead
Minster
Minster Lovell
Minsterley
Minsterworth
Minterne Magna
Minting
Mintlaw
Minto
Minton
Minwear
Minworth
Miodar
Mirbister
Mireland
Mirfield
Miserden
Miskin
Misson
Misterton
Mitcham
Mitchel Troy
Mitcheldean
Mitchell
Mitchelland
Mitcheltroy Common
Mitford
Mithian
Mitton
Mixbury
Moar
Moat
Mobberley
Moccas
Mochdre
Mochrum
Mockbeggar
Mockerkin
Modbury
Moddershall
Modsarie
Moelfre
Moffat
Mogerhanger
Moin'a'choire
Moine Ho.
Moira
Mol-chlach
Molash
Mold
Molehill Green
Moles-croft
Molesworth
Mollance
Molland
Mollington
Mollinsburn
Monachty
Monachylemore
Moncreiffe
Monevechadan
Monewden
Moneydie
Moniaive
Monifieth
Monikie
Monimail
Monington
Monk Fryston
Monk Sherborne
Monk Soham
Monk Street
Monk's Gate
Monken Hadley
Monkhopton
Monkland
Monkleigh
Monknash
Monkokehampton
Monks Eleigh
Monks Kirby
Monks Risborough
Monks' Heath
Monkseaton
Monkshill
Monksilver
Monkstadt
Monkswood
Monkton
Monkton Combe
Monkton Deverill
Monkton Farleigh
Monkton Heathfield
Monkton Up Wimborne
Monkwearmouth
Monkwood
Monmore Green
Monmouth
Monnington on Wye
Monreith
Monsale
Montacute
Monteach
Montford
Montford Bridge
Montgarrie
Montgomery
Montgreenan
Montrave
Montrose
Monument
Monxton
Monyash
Monymusk
Monzie
Moodiesburn
Moonzie
Moor Allerton
Moor Cock
Moor Crichel
Moor End
Moor Monkton
Moor Nook
Moor Row
Moor Side
Moorby
Moorcot
Moordown
Moore
Moorends
Moorgate
Moorgreen
Moorhall
Moorhampton
Moorhouse
Moorlinch
Moorsholm
Moorside
Moortown
Morangie
Morar
Morborne
Morchard Bishop
Morcombelake
Morcott
Morda
Morden
Morden Hall Park
Mordiford
Mordington
Mordon
Morebath
Morebattle
Morecambe
Morefield
Moreleigh
Morenish
Moresby
Morestead
Moreton
Moreton Corbet
Moreton Jeffries
Moreton Morrell
Moreton on Lugg
Moreton Pinkney
Moreton Say
Moreton Valence
Moreton-in-Marsh
Moretonhampstead
Morfa Bychan
Morfa Glas
Morfa Nefyn
Morgan's Vale
Mork
Morland
Morley
Morley Green
Morley St Botolph
Morningside
Morningthorpe
Mornington Crescent
Morpeth
Morphie
Morrey
Morriston
Morroch
Morston
Mortehoe
Mortimer
Mortimer West End
Mortimer's Cross
Mortlake
Morton
Morton Bagot
Morton-on-Swale
Morvah
Morval
Morvich
Morville
Morwellham
Morwenstow
Morwick Hall
Mosborough
Moscow
Mosedale
Moselden Height
Moseley
Moss
Moss Bank
Moss Nook
Moss of Barmuckity
Moss Side
Moss-side
Mossat
Mossbank
Mossblown
Mossburnford
Mossdale
Mossend
Mossgiel
Mosshead
Mosside
Mossley
Mossley Hill
Mosstodloch
Mosston
Mosterton
Mostyn
Motcombe
Motherby
Motherwell
Mottingham
Mottisfont
Mottistone
Mottram in Longdendale
Mottram St Andrew
Mouldsworth
Moulin
Moulsecoomb
Moulsford
Moulsham
Moulsoe
Moulton
Moulton Chapel
Moulton Seas End
Moulton St Mary
Mounie Castle
Mount
Mount Bures
Mount Edgcumbe
Mount Hawke
Mount Manisty
Mount Oliphant
Mount Pleasant
Mount Tabor
Mountain Ash
Mountain Cross
Mountain Water
Mountbenger
Mountblairy
Mountfield
Mountgerald
Mountjoy
Mountnessing
Mounton
Mountsorrel
Mountstuart
Mousehole
Mouswald
Mow Cop
Mowden
Mowhaugh
Mowsley
Mowtie
Moxley
Moy
Moy House
Moyles Court
Moylgrove
Muasdale
Much Birch
Much Cowarne
Much Dewchurch
Much Hadham
Much Hoole
Much Marcle
Much Wenlock
Muchalls
Muchelney
Muchlarnick
Muchra
Muchrachd
Mucking
Mucklestone
Muckleton
Muckletown
Muckton
Mudale
Mudchute
Muddiford
Muddles Green
Muddleswood
Mudeford
Mudford
Mudgley
Mugeary
Mugginton
Muggleswick
Muie
Muir
Muir of Fowlis
Muir of Lochs
Muir of Ord
Muirden
Muirdrum
Muirhead
Muirhouses
Muirkirk
Muirmill
Muirskie
Muirtack
Muirton
Muirton of Ardblair
Muirton of Ballochy
Muirtown
Muiryfold
Muker
Mulbarton
Mulben
Mulhagery
Mullach Charlabhaigh
Mullion
Mumby
Munderfield Row
Munderfield Stocks
Mundesley
Mundford
Mundham
Mundon
Mundurno
Munerigie
Mungasdale
Mungoswells
Mungrisdale
Munlochy
Munnoch
Munsley
Munslow
Murchington
Murcott
Murkle
Murlaganmore
Murlaggan
Murra
Murroes
Murrow
Mursley
Murston
Murthill
Murthly
Murton
Musbury
Muscoates
Musdale
Musselburgh
Muston
Mustow Green
Muswell Hill
Mutford
Muthill
Mutterton
Mybster
Myddfai
Myddle
Myddlewood
Mydroilyn
Mylor
Mylor Bridge
Mynachlog-ddu
Myndtown
Mynydd-bach
Mynytho
Mytchett
Mytholm
Mytholmroyd
Myton-on-Swale
N Leverton with Habblesthorpe
Naast
Naburn
Nackington
Nacton
Nafferton
Nailbridge
Nailsea
Nailstone
Nailsworth
Nairn
Nancegollan
Nancledre
Nanhoron
Nannau
Nannerch
Nanpantan
Nanpean
Nanstallon
Nant Peris
Nant y Pandy
Nant-ddu
Nant-glas
Nant-y-derry
Nant-y-dugoed
Nant-y-groes
Nant-y-moel
Nanternis
Nantgaredig
Nantgarw
Nantglyn
Nantlle
Nantmawr
Nantmel
Nantmor
Nantwich
Nantycaws
Nantyffyllon
Nantyglo
Naphill
Nappa
Napton on the Hill
Narberth
Narborough
Nasareth
Naseby
Nash
Nash Lee
Nassington
Nasty
Nateby
Nately Scures
Natland
Naughton
Naunton
Naunton Beauchamp
Navenby
Navestock
Navestock Side
Navidale
Navity
Nawton
Nayland
Nazeing
Neacroft
Neal's Green
Neap
Near Cotton
Near Sawrey
Neasden
Neasham
Neath
Neatham
Neatishead
Nebo
Necton
Nedd
Nedderton
Nedging Tye
Needham
Needham Market
Needingworth
Neen Savage
Neen Sollars
Neenton
Nefyn
Neilston
Nelson
Nelson Village
Nemphlar
Nempnett Thrubwell
Nenthall
Nenthead
Nenthorn
Nercwys
Nereabolls
Neriby
Nerston
Nesbit
Ness
Ness of Tenston
Nesscliffe
Neston
Nether Alderley
Nether Auchendrane
Nether Barr
Nether Blainslie
Nether Broughton
Nether Burrow
Nether Cerne
Nether Compton
Nether Crimond
Nether Dalgliesh
Nether Dallachy
Nether End
Nether Exe
Nether Glasslaw
Nether Handwick
Nether Haugh
Nether Headon
Nether Heyford
Nether Kellet
Nether Kinmundy
Nether Langwith
Nether Lenshie
Nether Moor
Nether Padley
Nether Pitforthie
Nether Poppleton
Nether Silton
Nether Stowey
Nether Urquhart
Nether Wallop
Nether Wellwood
Nether Whitacre
Nether Worton
Netheravon
Netherbrae
Netherbrough
Netherburn
Netherbury
Netherby
Nethercott
Netherend
Netherfield
Netherhall
Netherhampton
Netherley
Nethermill
Nethermuir
Netherseal
Nethershield
Netherstreet
Netherthird
Netherthong
Netherthorpe
Netherton
Nethertown
Netherwitton
Netherwood
Nethy Bridge
Netley
Netley Marsh
Nettlebed
Nettlebridge
Nettlecombe
Nettleden
Nettleham
Nettlestead
Nettlestead Green
Nettlestone
Nettleton
Netton
Neuadd
Nevendon
Nevern
Nevill Holt
New Abbey
New Aberdour
New Addington
New Alresford
New Alyth
New Arley
New Ash Green
New Barn
New Barnet
New Bewick
New Bolingbroke
New Bradwell
New Bridge
New Brighton
New Brinsley
New Broughton
New Buckenham
New Byth
New Cheriton
New Clipstone
New Costessey
New Cross
New Cross Gate
New Cumnock
New Deer
New Duston
New Earswick
New Edlington
New Elgin
New Ellerby
New Eltham
New End
New England
New Farnley
New Ferry
New Fryston
New Galloway
New Gilston
New Hartley
New Haw
New Hedges
New Holland
New Horton Grange
New Houghton
New Houses
New Hutton
New Hythe
New Inn
New Invention
New Kent Road
New Lanark
New Lane
New Leake
New Leeds
New Longton
New Luce
New Mains
New Mains of Ury
New Malden
New Marske
New Marton
New Mill
New Mill End
New Mills
New Milton
New Mistley
New Moat
New Orleans
New Park
New Pitsligo
New Polzeath
New Prestwick
New Quay
New Rackheath
New Radnor
New Rent
New Romney
New Rossington
New Row
New Sauchie
New Sawley
New Scone
New Silksworth
New Southgate
New Town
New Tredegar
New Ulva
New Walsoken
New Waltham
New Wimpole
New Winton
New Yatt
New York
Newark
Newark-on-Trent
Newarthill
Newbarn
Newbarns
Newbiggin
Newbiggin-by-the-Sea
Newbiggin-on-Lune
Newbigging
Newbold
Newbold on Avon
Newbold on Stour
Newbold Pacey
Newbold Verdon
Newborough
Newbottle
Newbourne
Newbridge
Newbridge on Wye
Newbridge-on-Usk
Newbrough
Newburgh
Newburn
Newbury
Newby
Newby Bridge
Newby East
Newby West
Newby Wiske
Newcastle
Newcastle Emlyn
Newcastle upon Tyne
Newcastle upon Tyne (PO Boxes)
Newcastle-under-Lyme
Newcastleton
Newchapel
Newchurch
Newcott
Newcraighall
Newdigate
Newell Green
Newenden
Newent
Newerne
Newfield
Newgale
Newgate
Newgate Street
Newgord
Newhall
Newham
Newham Hall
Newhaven
Newhey
Newholm
Newhouse
Newick
Newington
Newington Bagpath
Newington Green
Newland
Newland's Corner
Newlandrig
Newlands
Newlands of Geise
Newlyn
Newlyn East
Newmachar
Newmains
Newmarket
Newmill
Newmill of Inshewan
Newmills
Newmiln
Newmilns
Newnham
Newnham Paddox
Newnoth
Newport
Newport Pagnell
Newport-on-Tay
Newpound Common
Newquay
Newseat
Newsham
Newsholme
Newstead
Newthorpe
Newton
Newton Abbot
Newton Arlosh
Newton Aycliffe
Newton Bewley
Newton Blossomville
Newton Bromswold
Newton Burgoland
Newton by Toft
Newton Ferrers
Newton Flotman
Newton Harcourt
Newton Kyme
Newton Longville
Newton Mearns
Newton Morrell
Newton Mountain
Newton Mulgrave
Newton of Ardtoe
Newton of Balcanquhal
Newton of Dalvey
Newton of Falkland
Newton of Leys
Newton on Trent
Newton Poppleford
Newton Purcell
Newton Regis
Newton Reigny
Newton Solney
Newton St Cyres
Newton St Faith
Newton St Loe
Newton St Petrock
Newton Stacey
Newton Stewart
Newton Tony
Newton Tracey
Newton under Roseberry
Newton upon Derwent
Newton Valence
Newton-le-Willows
Newton-on-Ouse
Newton-on-Rawcliffe
Newton-on-the-Moor
Newtonairds
Newtongrange
Newtonhill
Newtonmill
Newtonmore
Newtown
Newtown in St Martin
Newtown Linford
Newtown St Boswells
Newtown Unthank
Newtyle
Neyland
Nibley
Nicholashayne
Nicholaston
Nidd
Niddrie
Nigg
Nightcott
Nilig
Nine Ashes
Nine Elms
Nine Mile Burn
Ninebanks
Ninfield
Ningwood
Nisbet
Niton
Nitshill
Nizels
No Man's Heath
Noak Hill
Noblehill
Nobottle
Nocton
Noddsdale
Noel Park
Noke
Nolton
Nomansland
Noneley
Nonington
Nook
Noonsbrough
Noranside
Norbiton
Norbreck
Norbury
Norchard
Nordelph
Norden
Nordley
Norham
Norland Town
Norley
Norman Cross
Norman's Bay
Norman's Green
Normanby
Normanby by Spital
Normanby le Wold
Normandy
Normann's Ruh
Normanton
Normanton le Heath
Normanton on Soar
Normanton on Trent
Normanton-on-the-Wolds
Normoss
Norrington Common
Norris Hill
North Acton
North Anston
North Ascot
North Aston
North Baddesley
North Ballachulish
North Balloch
North Barrow
North Barsham
North Benfleet
North Bersted
North Berwick
North Boarhunt
North Bogbain
North Bovey
North Bradley
North Brentor
North Brewham
North Buckland
North Burlingham
North Cadbury
North Cairn
North Carlton
North Cave
North Cerney
North Chailey
North Charford
North Charlton
North Cheriton
North Cliffe
North Clifton
North Cockerington
North Coker
North Cornelly
North Cotes
North Cove
North Cowton
North Crawley
North Cray
North Creake
North Curry
North Dallens
North Dalton
North Dawn
North Deighton
North Duffield
North Dulwich
North Ealing
North Elkington
North Elmham
North Elmsall
North End
North Erradale
North Essie
North Ferriby
North Finchley
North Frodingham
North Gorley
North Green
North Grimston
North Harrow
North Hayling
North Heasley
North Heath
North Hill
North Hinksey
North Holmwood
North Huish
North Hykeham
North Johnston
North Kelsey
North Kensington
North Kessock
North Killingholme
North Kilvington
North Kilworth
North Kyme
North Lancing
North Lee
North Leigh
North Littleton
North Lopham
North Luffenham
North Marden
North Marston
North Middleton
North Millbrex
North Molton
North Moreton
North Mundham
North Muskham
North Newbald
North Newington
North Newnton
North Newton
North Nibley
North Oakley
North Ockendon
North Ormesby
North Ormsby
North Owersby
North Perrott
North Petherton
North Petherwin
North Pickenham
North Piddle
North Poorton
North Queensferry
North Radworthy
North Rauceby
North Reston
North Rigton
North Rode
North Roe
North Runcton
North Sandwick
North Scale
North Scarle
North Seaton
North Shian
North Shields
North Shoebury
North Side
North Skelton
North Somercotes
North Stainley
North Stainmore
North Stifford
North Stoke
North Stoneham
North Street
North Sunderland
North Tamerton
North Tarbothill
North Tawton
North Third
North Thoresby
North Tidworth
North Town
North Tuddenham
North Walsham
North Waltham
North Warnborough
North Watten
North Weald Bassett
North Whilborough
North Wick
North Widcombe
North Willingham
North Wingfield
North Witham
North Woolwich
North Wootton
North Wraxall
North Wroughton
North Yardhope
Northacre
Northall Green
Northallerton
Northam
Northampton
Northaw
Northay
Northborough
Northbourne
Northbrook
Northburnhill
Northchapel
Northchurch
Northcote Manor
Northcott
Northdyke
Northend
Northfield
Northfields
Northfleet
Northhouse
Northiam
Northill
Northington
Northlands
Northleach
Northleigh
Northlew
Northmoor
Northmoor Green or Moorland
Northmuir
Northney
Northolt
Northop
Northop Hall
Northorpe
Northover
Northowram
Northpunds
Northrepps
Northton
Northtown
Northway
Northwich
Northwick
Northwold
Northwood
Northwood Green
Norton
Norton Bavant
Norton Bridge
Norton Canes
Norton Canon
Norton Disney
Norton Ferris
Norton Fitzwarren
Norton Green
Norton Hawkfield
Norton Heath
Norton in Hales
Norton in the Moors
Norton Lindsey
Norton Malreward
Norton Mandeville
Norton St Philip
Norton sub Hamdon
Norton Subcourse
Norton Wood
Norton-Juxta-Twycross
Norton-le-Clay
Norwell
Norwell Woodhouse
Norwich
Norwick
Norwood
Norwood Green
Norwood Hill
Norwood Junction
Noseley
Noss Mayo
Nosterfield
Nostie
Notgrove
Nottage
Notting Hill
Notting Hill Gate
Nottingham
Notton
Nounsley
Noutard's Green
Nowton
Nox
Noyadd Trefawr
Nuffield
Nun Monkton
Nunburnholme
Nuneaton
Nuneham Courtenay
Nunhead
Nunney
Nunnington
Nunnington Park
Nunthorpe
Nunton
Nunwick
Nup End
Nursling
Nursted
Nurton
Nutbourne
Nutfield
Nuthall
Nuthampstead
Nuthurst
Nutley
Nutwell
Nyadd
Nybster
Nyetimber
Nyewood
Nymet Rowland
Nymet Tracey
Nympsfield
Nynehead
Nythe
Nyton
Oad Street
Oadby
Oak Cross
Oakamoor
Oakbank
Oakdale
Oake
Oaken
Oakenclough
Oakengates
Oakenhead
Oakenshaw
Oakford
Oakgrove
Oakham
Oakhanger
Oakhill
Oakington
Oaklands
Oakle Street
Oakleigh Park
Oakley
Oakley Green
Oakley Park
Oakridge
Oaksey
Oakshaw Ford
Oakthorpe
Oaktree Hill
Oakwood
Oakwoodhill
Oakworth
Oalinlongart
Oare
Oasby
Oatfield
Oathlaw
Oban
Obley
Oborne
Occlestone Green
Occold
Occumster
Ochiltree
Ochr-y-Mynydd
Ochtermuthill
Ochtertyre
Ockbrook
Ockham
Ockle
Ockley
Ocle Pychard
Octon
Odcombe
Odd Down
Oddingley
Oddington
Oddsta
Odell
Odiham
Odstock
Odstone
Offchurch
Offenham
Offerton
Offham
Offord Cluny
Offord D'Arcy
Offton
Offwell
Ogbourne Maizey
Ogbourne St Andrew
Ogbourne St George
Ogden
Ogil
Ogle
Ogmore
Ogmore Vale
Ogmore-by-Sea
Oil Terminal
Okeford Fitzpaine
Okehampton
Okehampton Camp
Okraquoy
Old Aberdeen
Old Alresford
Old Arley
Old Basford
Old Basing
Old Bewick
Old Bolingbroke
Old Brampton
Old Bridge of Urr
Old Buckenham
Old Burghclere
Old Byland
Old Cleeve
Old Colwyn
Old Craig
Old Craighall
Old Crombie
Old Dailly
Old Dalby
Old Deer
Old Ellerby
Old Felixstowe
Old Fletton
Old Ford
Old Glossop
Old Goginan
Old Goole
Old Gore
Old Hall
Old Heath
Old Hill
Old Hutton
Old Kea
Old Kent Road
Old Kilpatrick
Old Kinnernie
Old Knebworth
Old Leake
Old Leslie
Old Malton
Old Micklefield
Old Milverton
Old Netley
Old Newton
Old Oak Common
Old Philpstoun
Old Portlethen
Old Radnor
Old Rattray
Old Rayne
Old Romney
Old Scone
Old Shields
Old Sodbury
Old Somerby
Old Stratford
Old Street
Old Sunderlandwick
Old Swarland
Old Swinford
Old Tupton
Old Warden
Old Weston
Old Windsor
Old Wives Lees
Old Woking
Old Wolverton
Oldberrow
Oldborough
Oldbury
Oldbury Naite
Oldbury on the Hill
Oldbury-on-Severn
Oldcastle
Oldcastle Heath
Oldcotes
Oldfield
Oldford
Oldhall
Oldham
Oldhamstocks
Oldhurst
Oldland
Oldmeldrum
Oldmill
Oldpark
Oldridge
Oldshore Beg
Oldstead
Oldtown of Aigas
Oldtown of Ord
Oldwalls
Oldways End
Oldwhat
Olgrinmore
Oliver's Battery
Ollaberry
Ollerton
Olney
Olton
Olveston
Olympia
Ombersley
Ompton
Onchan
Onecote
Ongar Hill
Ongar Street
Onibury
Onich
Onllwyn
Onneley
Onslow Village
Opinan
Orange Lane
Orbliston
Orbost
Orby
Orcadia
Orchard
Orchard Portman
Orchard Wyndham
Orcheston
Orcop
Orcop Hill
Ord
Ordhead
Ordie
Ordiequish
Ordsall
Ore
Oreham Common
Oreston
Oreton
Orford
Orgreave
Orleton
Orleton Common
Orlingbury
Ormesby
Ormesby St Margaret
Ormesby St Michael
Ormiscaig
Ormiston
Ormsaigmore
Ormsdale
Ormskirk
Ormwe
Orphir
Orpington
Orrell
Orrisdale
Orrok Ho.
Orroland
Orsett
Orslow
Orston
Orton
Orton Longueville
Orton Waterville
Orton-on-the-Hill
Orwell
Osbaldeston
Osbaldwick
Osbaston
Osborne
Osbournby
Oscroft
Ose
Osgathorpe
Osgodby
Osidge
Oskaig
Osmaston
Osmington
Osmington Mills
Osmotherley
Osney
Ospringe
Ossett
Ossington
Ostend
Osterley
Osterley Park
Oswaldkirk
Oswaldtwistle
Oswestry
Otford
Otham
Othery
Otley
Otter
Otter Ferry
Otterbourne
Otterburn
Otterburn Camp
Otterden Place
Otterham
Otterhampton
Ottershaw
Otterswick
Otterton
Ottery St Mary
Ottinge
Ottringham
Oughterby
Oughtershaw
Oughtibridge
Oulston
Oulton
Oulton Broad
Oulton Street
Oundle
Ousby
Ousdale
Ousden
Ousefleet
Ouston
Out Newton
Out Rawcliffe
Outertown
Outgate
Outhgill
Outlands
Outlane
Outwell
Outwood
Oval
Ovenden
Over Compton
Over End
Over Haddon
Over Kellet
Over Kiddington
Over Norton
Over Peover
Over Rankeilour
Over Silton
Over Stowey
Over Stratton
Over Tabley
Over Wallop
Over Whitacre
Over Worton
Overbister
Overbury
Overcombe
Overleigh
Overpool
Overseal
Oversland
Oversley Green
Overstone
Overstrand
Overton
Overtown
Overy Staithe
Oving
Ovingdean
Ovingham
Ovington
Ower
Owermoigne
Owlswick
Owmby
Owmby by Spital
Owslebury
Owston
Owston Ferry
Owstwick
Owthorpe
Oxborough
Oxcliffe Hill
Oxcombe
Oxen End
Oxen Park
Oxenholme
Oxenhope
Oxenton
Oxenwood
Oxford
Oxford Circus
Oxford Street
Oxhill
Oxley
Oxley's Green
Oxnam
Oxnead
Oxnop Ghyll
Oxshott
Oxspring
Oxted
Oxton
Oxwich
Oxwich Green
Oxwick
Oykel Bridge
Oyne
Ozleworth
Pabail Iarach
Pabail Uarach
Packington
Padanaram
Padbury
Paddington
Paddlesworth
Paddock Wood
Paddockhaugh
Paddockhole
Paddolgreen
Padeswood
Padiham
Padside
Padstow
Padworth
Pagham
Paglesham Churchend
Paglesham Eastend
Paibeil
Paible
Paignton
Pailton
Painscastle
Painshawfield
Painswick
Paisley
Pakefield
Pakenham
Pale
Palestine
Paley Street
Palgowan
Palgrave
Pallinsburn House
Palmers Green
Palmerscross
Palmerstown
Palnackie
Palnure
Palterton
Pamber End
Pamber Green
Pamber Heath
Pamington
Pamphill
Pampisford
Pan
Panborough
Panbride
Pancrasweek
Pandy
Pandy Tudur
Panfield
Pangbourne
Pannal
Panpunton
Pant
Pant Gwyn
Pant Mawr
Pant-glas
Pant-lasau
Pant-pastynog
Pant-y-dwr
Pant-y-ffridd
Pantasaph
Pantglas
Pantgwyn
Panton
Pantperthog
Pantyffordd
Pantyffynnon
Panxworth
Papcastle
Papple
Papplewick
Papworth Everard
Papworth St Agnes
Par
Parbold
Parbrook
Parc
Parcllyn
Parcrhydderch
Pardshaw
Parham
Parish Holm
Park Corner
Park End
Park Gate
Park Lane
Park Royal
Park Street
Parkend
Parkeston
Parkford
Parkgate
Parkham
Parkham Ash
Parkhill
Parkhouse
Parkhurst
Parkmill
Parkmore
Parkneuk
Parkstone
Parley Cross
Parracombe
Parrog
Parson Drove
Parsonby
Parsons Green
Partick
Partington
Partney
Parton
Partridge Green
Parwich
Passenham
Passfield
Passingford Bridge
Paston
Patcham
Patching
Patchole
Patchway
Pateley Bridge
Path of Condie
Pathe
Pathhead
Patmore Heath
Patna
Patney
Patrick
Patrick Brompton
Patrington
Patrishow
Patrixbourne
Patterdale
Pattingham
Pattishall
Pattiswick
Paulerspury
Paull
Paulton
Pauperhaugh
Pavenham
Pawlett
Pawston
Paxford
Paxhill Park
Paxton
Payhembury
Paythorne
Peacehaven
Peacemarsh
Peachley
Peak Dale
Peak Forest
Peakirk
Pean Hill
Pearsie
Pease Pottage
Peasedown St John
Peasemore
Peasenhall
Peaslake
Peasmarsh
Peaston
Peastonbank
Peat Inn
Peathill
Peatling Magna
Peatling Parva
Peaton
Pebble Coombe
Pebmarsh
Pebworth
Pecket Well
Peckforton
Peckham
Peckham Rye
Peckleton
Pedmore
Pedwell
Peebles
Peel
Pegswood
Peighinn nan Aoireann
Peinchorran
Peinlich
Pelaw
Pelcomb Bridge
Pelcomb Cross
Peldon
Pelsall
Pelton
Pelutho
Pelynt
Pembrey
Pembridge
Pembroke
Pembroke Dock
Pembury
Pen-bont Rhydybeddau
Pen-clawdd
Pen-ffordd
Pen-groes-oped
Pen-llyn
Pen-sarn
Pen-twyn
Pen-y-banc
Pen-y-bont
Pen-y-bont-fawr
Pen-y-bryn
Pen-y-cae
Pen-y-cae-mawr
Pen-y-cefn
Pen-y-clawdd
Pen-y-coedcae
Pen-y-fai
Pen-y-garn
Pen-y-garreg
Pen-y-Park
Pen-y-stryt
Pen-yr-hoel
Penallt
Penally
Penalt
Penare
Penarth
Penboyr
Penbryn
Pencader
Pencaenewydd
Pencaitland
Pencarreg
Pencelli
Pencoed
Pencombe
Pencoyd
Pencraig
Pendeen
Penderyn
Pendine
Pendlebury
Pendleton
Pendock
Pendoggett
Pendomer
Pendoylan
Penegoes
Pengam
Penge
Pengenffordd
Pengorffwysfa
Pengover Green
Pengwern
Penhale
Penhallow
Penhalvean
Penhow
Penhurst
Peniarth
Penicuik
Penifiler
Peninver
Penisar Waun
Penisarcwn
Penistone
Penjerrick
Penketh
Penkridge
Penley
Penllech
Penllergaer
Penllyn
Penmachno
Penmaen
Penmaenmawr
Penmaenpool
Penmark
Penmon
Penmorfa
Penmynydd
Penn
Penn Street
Pennal
Pennan
Pennance
Pennant
Pennant Melangell
Pennard
Pennerley
Penninghame
Pennington
Pennsylvania
Penny Bridge
Pennyfuir
Pennyghael
Pennyglen
Pennygown
Pennymoor
Penparc
Penparcau
Penperlleni
Penpillick
Penpol
Penpoll
Penpont
Penrherber
Penrhiw-llan
Penrhiw-pal
Penrhiwceiber
Penrhiwgoch
Penrhos
Penrhos-garnedd
Penrhyn Bay
Penrhyn-coch
Penrhyn-side
Penrhyndeudraeth
Penrhys
Penrice
Penrith
Penrose
Penruddock
Penryn
Pensarn
Pensax
Pensby
Penselwood
Pensford
Pensham
Penshaw
Penshurst
Pensilva
Pensnett
Pentewan
Pentir
Pentire
Pentlepoir
Pentlow
Pentney
Penton Mewsey
Pentonville
Pentraeth
Pentre
Pentre Berw
Pentre Gwenlais
Pentre Gwynfryn
Pentre Halkyn
Pentre Isaf
Pentre Llanrhaeadr
Pentre Saron
Pentre'r beirdd
Pentre'r-felin
Pentre-bach
Pentre-bont
Pentre-bwlch
Pentre-celyn
Pentre-chwyth
Pentre-cwrt
Pentre-Dolau-Honddu
Pentre-Dwr
Pentre-galar
Pentre-Llwyn-Llwyd
Pentre-piod
Pentre-Poeth
Pentre-tafarn-y-fedw
Pentre-ty-gwyn
Pentrebach
Pentrecagal
Pentreclwydau
Pentredwr
Pentrefelin
Pentrefoelas
Pentregat
Pentreheyling
Pentrich
Pentridge
Pentwyn
Pentyrch
Penuwch
Penwithick
Penwortham
Penwyllt
Penybont
Penybryn
Penycae
Penycwm
Penyffordd
Penygarnedd
Penygraig
Penygroes
Penysarn
Penywaun
Penzance
Peopleton
Peover Heath
Peper Harow
Peplow
Perceton
Percie
Perham Down
Perivale
Perkhill
Perkins Beach
Perlethorpe
Perranarworthal
Perranporth
Perranuthnoe
Perranzabuloe
Perry Barr
Perry Green
Perry Street
Persey
Pershall
Pershore
Pert
Pertenhall
Perth
Perthy
Perton
Peter Tavy
Peter's Green
Peterborough
Peterburn
Peterchurch
Peterculter
Peterhead
Peterlee
Peters Marland
Petersfield
Peterston-super-Ely
Peterstone Wentlooge
Peterstow
Petham
Petrockstow
Pett
Pettaugh
Pettinain
Pettistree
Petton
Petty
Pettycur
Pettymuick
Petworth
Pevensey
Pevensey Bay
Pewsey
Phesdo
Philham
Philiphaugh
Phillack
Philleigh
Philpstoun
Phoenix Green
Phones
Phorp
Pibsbury
Pica
Piccadilly Circus
Piccadilly Corner
Piccotts End
Pickerells
Pickering
Picket Piece
Picket Post
Pickford Green
Pickhill
Picklescott
Pickletillem
Pickmere
Pickstock
Pickston
Pickwell
Pickworth
Picton
Piddinghoe
Piddington
Piddlehinton
Piddletrenthide
Pidley
Piercebridge
Pierowall
Pigdon
Pikehall
Pilgrims Hatch
Pilham
Pill
Pillaton
Pillerton Hersey
Pillerton Priors
Pilleth
Pilley
Pilling
Pilling Lane
Pillowell
Pilning
Pilsbury
Pilsdon
Pilsgate
Pilsley
Pilton
Pimlico
Pimperne
Pinchbeck
Pinchbeck Bars
Pinchbeck West
Pinchinthorpe
Pinfold
Pinhay
Pinhoe
Pinkneys Green
Pinley Green
Pinminnoch
Pinmore
Pinn
Pinner
Pinner Green
Pinvin
Pinwherry
Pinxton
Pipe and Lyde
Pipe Gate
Pipe Ridware
Piper's Pool
Piperhall
Piperhill
Pipewell
Pippacott
Pipton
Pirbright
Pirnmill
Pirton
Pisgah
Pishill
Pistyll
Pitagowan
Pitblae
Pitcairngreen
Pitcairns
Pitcaple
Pitch Green
Pitch Place
Pitchcombe
Pitchcott
Pitchford
Pitcombe
Pitcot
Pitcox
Pitcur
Pitfichie
Pitgrudy
Pitinnan
Pitkennedy
Pitkevy
Pitlessie
Pitlochry
Pitmedden
Pitminster
Pitmuies
Pitmunie
Pitnacree
Pitney
Pitroddie
Pitscottie
Pitsea
Pitsford
Pitsford Hill
Pitstone
Pitstone Green
Pitt
Pittendreich
Pittentrail
Pittenweem
Pittington
Pittodrie Ho.
Pitton
Pity Me
Pityme
Pixey Green
Place Newton
Plaidy
Plains
Plaish
Plaistow
Plaitford
Plas
Plas Gogerddan
Plas Gwynant
Plas Isaf
Plas Llwyd
Plas Llwyngwern
Plas Llysyn
Plas Nantyr
Plas-rhiw-Saeson
Plas-yn-Cefn
Plashet
Plasisaf
Plastow Green
Platt
Platt Lane
Plawsworth
Plaxtol
Play Hatch
Playden
Playford
Playing Place
Plealey
Plean
Pleasance
Pleasington
Pleasley
Plenmeller
Pleshey
Plockton
Ploughfield
Plowden
Ploxgreen
Pluckley
Pluckley Thorne
Plumbland
Plumley
Plumpton
Plumpton End
Plumpton Green
Plumpton Head
Plumstead
Plumtree
Plungar
Plush
Plwmp
Plym Bridge
Plymouth
Plympton
Plymstock
Plymtree
Pockley
Pocklington
Pocombe Bridge
Pode Hole
Podimore
Podington
Podmore
Poffley End
Pointon
Pokesdown
Polapit Tamar
Polbae
Polbain
Polbathic
Polbeth
Polchar
Poldean
Polebrook
Polegate
Poles
Polesworth
Polgooth
Polgown
Poling
Poling Corner
Polkerris
Poll a'Charra
Polla
Polldubh
Pollie
Pollington
Polloch
Pollokshaws
Polmassick
Polmont
Polnoon
Polperro
Polruan
Polsham
Polstead
Poltalloch
Poltimore
Polton
Polwarth
Polyphant
Polzeath
Pond Street
Ponders End
Pondersbridge
Ponsanooth
Ponsonby
Ponsworthy
Pont Aber
Pont Aber Glaslyn
Pont Ceri
Pont Crugnant
Pont Cyfyng
Pont Dolgarrog
Pont Nedd Fechan
Pont Pen-y-benglog
Pont Rhyd-sarn
Pont Rhyd-y-cyff
Pont Walby
Pont y gwaith
Pont yr Alwen
Pont-faen
Pont-Henri
Pont-rhyd-y-fen
Pont-rhyd-y-groes
Pont-rug
Pont-y-pant
Pontamman
Pontantwn
Pontardawe
Pontardulais
Pontargothi
Pontarsais
Pontblyddyn
Pontbren llwyd
Pontefract
Ponteland
Ponterwyd
Pontesbury
Pontesford
Pontfadog
Pontfaen
Ponthir
Ponthirwaun
Pontllanfraith
Pontlliw
Pontllyfni
Pontlottyn
Pontnewydd
Pontnewynydd
Pontrhydfendigaid
Pontrhydyrun
Pontrilas
Pontrobert
Ponts Green
Pontshaen
Pontshill
Pontsticill
Pontwelly
Pontyates
Pontyberem
Pontybodkin
Pontyclun
Pontycymer
Pontymister
Pontypool
Pontypridd
Pontywaun
Pooksgreen
Pool
Pool Bank
Pool of Muckhart
Pool Quay
Pool Street
Poole
Poole Keynes
Poolewe
Pooley Bridge
Poolhill
Pope Hill
Popeswood
Popham
Poplar
Porchfield
Porin
Porkellis
Porlock
Porlock Weir
Port Allen
Port Appin
Port Askaig
Port Bannatyne
Port Carlisle
Port Charlotte
Port Clarence
Port Driseach
Port e Vullen
Port Ellen
Port Elphinstone
Port Erin
Port Erroll
Port Eynon
Port Gaverne
Port Glasgow
Port Henderson
Port Isaac
Port Logan
Port Mor
Port Mulgrave
Port na Craig
Port nan Long
Port Nis
Port o' Warren
Port of Menteith
Port Penrhyn
Port Ramsay
Port Sonachan
Port St Mary
Port Sunlight
Port Talbot
Port Wemyss
Port William
Portachoillan
Portavadie
Portbury
Portchester
Portencross
Portesham
Portessie
Portfield Gate
Portgate
Portgordon
Portgower
Porth
Porth Colmon
Porth Mellin
Porth Navas
Porth-y-waen
Porthallow
Porthcawl
Porthcothan
Porthcurno
Porthgain
Porthkerry
Porthleven
Porthmadog
Porthmeor
Portholland
Porthoustock
Porthpean
Porthtowan
Porthyrhyd
Portincaple
Portinscale
Portishead
Portknockie
Portlethen
Portloe
Portmahomack
Portmeirion
Portmore
Portnacon
Portnacroish
Portnaguran
Portnahaven
Portnalong
Portnaluchaig
Portobello
Porton
Portpatrick
Portquin
Portreath
Portree
Portscatho
Portsea
Portskerra
Portskewett
Portslade
Portslade-by-Sea
Portslogan
Portsmouth
Portsoy
Portswood
Portuairk
Portway
Portwrinkle
Portyerrock
Poslingford
Postbridge
Postcombe
Postling
Postwick
Potarch
Potsgrove
Pott Row
Pott Shrigley
Potten End
Potter Heigham
Potter Street
Potter's Cross
Potterhanworth
Potterne
Potterne Wick
Potters Bar
Potters Crouch
Potterspury
Potterton
Potto
Potton
Poughill
Poulner
Poulshot
Poulton
Poulton-le-Fylde
Pound Bank
Pound Green
Pound Hill
Poundffald
Poundgate
Poundland
Poundon
Poundsbridge
Poundsgate
Poundstock
Povey Cross
Pow Green
Powburn
Powderham
Powerstock
Powfoot
Powick
Powler's Piece
Powmill
Poxwell
Poyle
Poynings
Poyntington
Poynton
Poynton Green
Poyntzfield
Poys Street
Poyston Cross
Poystreet Green
Praa Sands
Pratis
Pratt's Bottom
Praze-an-Beeble
Predannack Wollas
Prees
Prees Green
Prees Higher Heath
Preesall
Preesgweene
Pren-gwyn
Prenbrigog
Prendergast
Prendwick
Prenteg
Prenton
Prescot
Prescott
Presley
Pressen
Prestatyn
Prestbury
Presteigne
Presthope
Prestleigh
Prestolee
Preston
Preston Bagot
Preston Bissett
Preston Brockhurst
Preston Brook
Preston Candover
Preston Capes
Preston Deanery
Preston Gubbals
Preston on Stour
Preston on the Hill
Preston on Wye
Preston Plucknett
Preston upon the Weald Moors
Preston Wynne
Preston-under-Scar
Prestonpans
Prestwich
Prestwick
Prestwold
Prestwood
Price Town
Prickwillow
Priddy
Priest Hutton
Priestland
Priestweston
Primethorpe
Primrose Green
Primrose Hill
Princes End
Princes Gate
Princes Risborough
Princethorpe
Princetown
Prior Muir
Prior's Frome
Priors Hardwick
Priors Marston
Priory Wood
Priston
Prittlewell
Privett
Prixford
Probus
Protsonhill
Prudhoe
Pubil
Publow
Puckeridge
Puckington
Pucklechurch
Pudding Mill Lane
Puddinglake
Puddington
Puddlebrook
Puddledock
Puddletown
Pudleston
Pudsey
Pulborough
Puldagon
Puleston
Pulford
Pulham
Pulham Market
Pulham St Mary
Pulloxhill
Pulrossie
Pulverbatch
Pumpherston
Pumsaint
Puncheston
Puncknowle
Punnett's Town
Purbrook
Purfleet
Puriton
Purleigh
Purley
Purley on Thames
Purlogue
Purls Bridge
Purse Caundle
Purslow
Purston Jaglin
Purton
Purton Stoke
Purves Hall
Pury End
Pusey
Putley
Putloe
Putney
Putney Bridge
Putney Heath
Putney Vale
Puttenham
Puttock End
Puxton
Pwll
Pwll Trap
Pwll-y-glaw
Pwllcrochan
Pwlldefaid
Pwllgloyw
Pwllheli
Pwllmeyric
Pye Corner
Pye Green
Pyecombe
Pyle
Pylle
Pymore
Pyrford
Pyrton
Pytchley
Pyworthy
Quabbs
Quadring
Quadring Eaudike
Quainton
Quarley
Quarmby
Quarndon
Quarr Hill
Quarrier's Village
Quarrington
Quarrington Hill
Quarry Bank
Quarrybank
Quarrywood
Quarter
Quatford
Quatt
Quebec
Quedgeley
Queen Adelaide
Queen Camel
Queen Charlton
Queen Street
Queen's Gate
Queen's Head
Queen's Park
Queenborough
Queens Road
Queensbury
Queensferry
Queensway
Queenzieburn
Quemerford
Quendale
Quendon
Queniborough
Quenington
Quernmore
Queslett
Quethiock
Quidenham
Quidhampton
Quilquox
Quina Brook
Quindry
Quine's Hill
Quinhill
Quinton
Quintrell Downs
Quoditch
Quoig
Quoigs
Quorn
Quothquan
Quoyloo
Quoys
Quoys of Reiss
Raby
Rachub
Rackenford
Rackham
Rackheath
Racks
Rackwick
Radbourne
Radcliffe
Radcliffe on Trent
Radcot
Radford
Radford Semele
Radipole
Radlett
Radley
Radstock
Radstone
Radway
Radway Green
Radwell
Radwinter
Radyr
Raechester
Rafford
Ragdale
Raglan
Ragnall
Rahoy
Rainford
Rainham
Rainhill
Rainhill Stoops
Rainow
Rainton
Rainworth
Raisbeck
Rait
Raithby
Rake
Raleigh's Cross
Ram
Ram Lane
Ramasaig
Rame
Rampisham
Rampside
Rampton
Ramsbottom
Ramsbury
Ramscraigs
Ramsdean
Ramsdell
Ramsden
Ramsden Bellhouse
Ramsden Heath
Ramsey
Ramsey Forty Foot
Ramsey Heights
Ramsey Island
Ramsey Mereside
Ramsey St Mary's
Ramsgate
Ramsgate Street
Ramsgill
Ramsholt
Ramshorn
Ramsnest Common
Ranachan
Ranby
Rand
Randwick
Rangemore
Ranger's House
Rangeworthy
Rank's Green
Rankinston
Rannoch School
Ranochan
Ranskill
Ranton
Ranworth
Rapness
Rascarrel
Raskelf
Rassau
Rastrick
Ratby
Ratcliffe Culey
Ratcliffe on Soar
Ratcliffe on the Wreake
Ratford Bridge
Rathen
Rathillet
Rathliesbeag
Rathmell
Ratho
Ratho Station
Rathven
Ratley
Ratlinghope
Rattar
Ratten Row
Rattery
Rattlesden
Rattray
Raughton Head
Raunds
Ravenfield
Ravenglass
Raveningham
Ravenscar
Ravenscourt Park
Ravensdale
Ravensden
Ravenshaw
Ravenshayes
Ravenshead
Ravensmoor
Ravensthorpe
Ravenstone
Ravenstonedale
Ravenstruther
Ravensworth
Rawcliffe
Rawcliffe Bridge
Rawdon
Rawmarsh
Rawreth
Rawridge
Rawtenstall
Rawyards
Raxton
Raydon
Raylees
Rayleigh
Raymond's Hill
Rayne
Raynes Park
Reading
Reading Street
Reagill
Rearquhar
Rearsby
Rease Heath
Reaster
Reawick
Reay
Reculver
Red Dial
Red Hill
Red Lodge
Red Oaks Hill
Red Post
Red Rock
Red Roses
Red Row
Red Street
Red Wharf Bay
Redberth
Redbourn
Redbourne
Redbridge
Redbrook
Redbrook Street
Redburn
Redcar
Redcastle
Redcliff Bay
Redcloak
Reddish
Redditch
Rede
Redenhall
Redesmouth
Redford
Redgrave
Redheugh
Redhill
Redhouse
Redhouses
Redisham
Redland
Redlingfield
Redlynch
Redmarley D'Abitot
Redmarshall
Redmile
Redmire
Redmoor
Rednal
Redpath
Redpoint
Redruth
Redscarhead
Redstone Bank
Redwick
Redworth
Reed
Reedham
Reedness
Reepham
Reeth
Regaby
Regent Street
Regent's Park
Regents Park
Regil
Regoul
Reiff
Reigate
Reighton
Reinigeadal
Reisgill
Reiss
Rejerrah
Relubbus
Relugas
Remenham
Remenham Hill
Remony
Rempstone
Rendcomb
Rendham
Rendlesham
Renfrew
Renhold
Renishaw
Rennington
Renton
Renwick
Repps
Repton
Rescobie
Resipole
Resolis
Resolven
Reston
Reswallie
Retew
Retford
Rettendon
Rettendon Place
Retyn
Revesby
Rew
Rewe
Reydon
Reymerston
Reynalton
Reynoldston
Rezare
Rhandirmwyn
Rhaoine
Rhayader
Rheindown
Rhelonie
Rhemore
Rhes-y-cae
Rhewl
Rhian
Rhiconich
Rhicullen
Rhidorroch
Rhifail
Rhigos
Rhilochan
Rhinduie
Rhireavach
Rhiroy
Rhiw
Rhiwargor
Rhiwbryfdir
Rhiwderin
Rhiwlas
Rhodes Minnis
Rhodesia
Rhodiad
Rhodmad
Rhonadale
Rhondda
Rhonehouse or Kelton Hill
Rhoose
Rhos
Rhos Hill
Rhos-ddu
Rhos-fawr
Rhos-on-Sea
Rhos-y-brwyner
Rhos-y-gwaliau
Rhos-y-llan
Rhos-y-Meirch
Rhoscolyn
Rhoscrowther
Rhosesmor
Rhosgadfan
Rhosgoch
Rhoshirwaun
Rhoslan
Rhoslefain
Rhosllanerchrugog
Rhosmaen
Rhosmeirch
Rhosneigr
Rhosnesni
Rhossili
Rhosson
Rhostryfan
Rhostyllen
Rhosybol
Rhu
Rhuallt
Rhubodach
Rhuddlan
Rhue
Rhulen
Rhumach
Rhunahaorine
Rhyd
Rhyd-Ddu
Rhyd-rosser
Rhyd-uchaf
Rhyd-y-clafdy
Rhyd-y-foel
Rhyd-y-fro
Rhyd-y-meirch
Rhyd-yr-onnen
Rhydargaeau
Rhydcymerau
Rhydd
Rhydding
Rhydlanfair
Rhydlewis
Rhydlios
Rhydlydan
Rhydolion
Rhydowen
Rhydspence
Rhydtalog
Rhydwyn
Rhydycroesau
Rhydyfelin
Rhydymain
Rhydymwyn
Rhydywrach
Rhyl
Rhymney
Rhyn
Rhynd
Rhynie
Ribbesford
Ribbleton
Ribchester
Ribigill
Riby
Riccall
Riccarton
Richard's Castle
Richings Park
Richmond
Richmond Park
Richmond upon Thames
Rickarton
Rickford
Rickinghall
Rickling
Rickling Green
Rickmansworth
Riddell
Riddings
Riddlecombe
Riddlesden
Ridge
Ridge Green
Ridge Lane
Ridgebourne
Ridgeway
Ridgeway Cross
Ridgewell
Ridgewood
Ridgmont
Riding Mill
Ridley
Ridleywood
Ridlington
Ridsdale
Riechip
Rievaulx
Rigg
Riggend
Rigmaden Park
Rigsby
Rigside
Rileyhill
Rilla Mill
Rillington
Rimington
Rimpton
Rimswell
Rinaston
Ring's End
Ringford
Ringland
Ringles Cross
Ringmer
Ringmore
Ringorm
Ringsfield
Ringsfield Corner
Ringshall
Ringshall Stocks
Ringstead
Ringwood
Ringwould
Rinloan
Rinmore
Rinnigill
Rinsey
Ripe
Ripley
Riplingham
Ripon
Rippingale
Ripple
Ripponden
Risabus
Risbury
Risby
Risca
Rise
Risegate
Riseley
Rishangles
Rishton
Rishworth
Risley
Risplith
Rispond
Rivar
Rivenhall
Rivenhall End
River
River Bank
River Bridge
Riverford Bridge
Riverhead
Riverside
Rivington
Roa Island
Roade
Roadhead
Roadside
Roadside of Kinneff
Roadwater
Roag
Roath
Roberton
Robertsbridge
Robertstown
Roberttown
Robeston Cross
Robeston Wathen
Robin Hood
Robin Hood's Bay
Robins
Roborough
Roby
Roby Mill
Rocester
Roch
Rochallie
Rochdale
Roche
Rochester
Rochford
Rock Ferry
Rockbeare
Rockbourne
Rockcliffe
Rockfield
Rockhampton
Rockhead
Rockingham
Rockland All Saints
Rockland St Mary
Rockland St Peter
Rockley
Rocks Lane
Rockside
Rockwell End
Rockwell Green
Rodborough
Rodbourne
Rodbridge Corner
Rodd
Roddam
Rodden
Rode
Rode Heath
Rodeheath
Rodel
Roden
Rodhuish
Rodington
Rodley
Rodmarton
Rodmell
Rodmersham
Rodney Stoke
Rodsley
Rodway
Roe Green
Roecliffe
Roehampton
Roesound
Roewen
Roffey
Rogart
Rogate
Rogerstone
Rogiet
Roker
Rollesby
Rolleston
Rollestone
Rolston
Rolvenden
Rolvenden Layne
Romaldkirk
Romanby
Romannobridge
Romansleigh
Romford
Romiley
Romney Street
Romsey
Romsley
Ronachan
Ronague
Ronnachmore
Rookhope
Rookley
Rooks Bridge
Rookwith
Roos
Roosecote
Rootpark
Ropley
Ropley Dean
Ropley Soke
Ropsley
Rora
Rorandle
Rorrington
Rosarie
Rose
Rose Ash
Rose Green
Roseacre
Rosebank
Rosebrough
Rosebush
Rosedale Abbey
Roseden
Rosehall
Rosehearty
Rosehill
Roseisle
Rosemarket
Rosemarkie
Rosemary Lane
Rosemount
Rosepool
Rosewarne
Rosewell
Roseworthy
Rosgill
Roshven
Roskhill
Rosley
Roslin
Rosliston
Rosneath
Ross
Ross Priory
Ross-on-Wye
Rossdhu House
Rossett
Rossie Farm School
Rossie Ochill
Rossington
Rosskeen
Roster
Rostherne
Rosthwaite
Roston
Rosyth
Rothbury
Rotherby
Rotherfield
Rotherfield Greys
Rotherfield Peppard
Rotherham
Rotherhithe
Rothersthorpe
Rotherwick
Rothes
Rothesay
Rothiebrisbane
Rothienorman
Rothiesholm
Rothley
Rothwell
Rotsea
Rottal
Rottingdean
Rottington
Roud
Roudham
Rough Close
Rough Common
Rougham
Rougham Green
Roughburn
Roughlee
Roughley
Roughton
Roundhay
Roundstreet Common
Roundway
Rous Lench
Rousdon
Rousham
Rousham Gap
Routenburn
Routh
Row
Row Heath
Row Town
Rowanburn
Rowardennan Lodge
Rowberrow
Rowchoish
Rowde
Rowfoot
Rowhedge
Rowhook
Rowington
Rowington Green
Rowland
Rowland's Castle
Rowlands Gill
Rowledge
Rowley
Rowley Regis
Rowlstone
Rowly
Rowner
Rowney Green
Rownhams
Rowrah
Rowsham
Rowsley
Rowstock
Rowston
Rowthorne
Rowton
Roxburgh
Roxby
Roxton
Roxwell
Royal British Legion Village
Royal Leamington Spa
Royal Oak
Royal Tunbridge Wells
Roybridge
Roydon
Roydon Hamlet
Royston
Royton
Ruabon
Ruaig
Ruan Lanihorne
Ruan Major
Ruan Minor
Ruanaich
Ruardean
Ruardean Woodside
Rubery
Ruckcroft
Ruckinge
Ruckland
Ruckley
Rudbaxton
Rudby
Rudchester
Ruddington
Ruddlemoor
Rudford
Rudge
Rudgeway
Rudgwick
Rudhall
Rudheath
Rudley Green
Rudry
Rudston
Rudyard
Rufford
Rufforth
Ruffside
Rugeley
Ruilick
Ruishton
Ruisigearraidh
Ruislip
Ruislip Common
Rumbling Bridge
Rumburgh
Rumford
Rumney
Rumwell
Runacraig
Runcorn
Runcton
Runcton Holme
Rundlestone
Runfold
Runhall
Runham
Runnington
Runsell Green
Runswick
Runtaleave
Runwell
Ruscombe
Rush Green
Rushall
Rushbrooke
Rushbury
Rushden
Rushford
Rushlake Green
Rushmere
Rushmere St Andrew
Rushmoor
Rushock
Rusholm
Rushton
Rushton Spencer
Rushwick
Rushyford
Ruskie
Ruskington
Rusko
Rusland
Rusper
Ruspidge
Russel
Russell Square
Russell's Water
Rusthall
Rustington
Ruston
Ruston Parva
Ruswarp
Rutherend
Rutherford
Rutherglen
Ruthernbridge
Ruthin
Ruthrieston
Ruthven
Ruthvoes
Ruthwell
Ruyton-XI-Towns
Ryal
Ryal Fold
Ryall
Ryarsh
Rydal
Ryde
Rydon
Rye
Rye Foreign
Rye Harbour
Rye Lane
Rye Park
Ryhall
Ryhill
Ryhope
Ryland
Rylstone
Ryme Intrinseca
Ryther
Ryton
Ryton-on-Dunsmore
Sabden
Sackers Green
Sacombe
Sacriston
Sadberge
Saddell
Saddington
Saddle Bow
Sadgill
Saffron Walden
Sageston
Saham Toney
Saighdinis
Saighton
Saint Hill
Saintbury
Salachail
Salcombe
Salcombe Regis
Salcott
Sale Green
Saleby
Salehurst
Salem
Salen
Salesbury
Salford
Salford Priors
Salfords
Salhouse
Saline
Salisbury
Salkeld Dykes
Sall
Sallachan
Sallachry
Sallachy
Salmonby
Salmond's Muir
Salperton
Salph End
Salsburgh
Salt
Salt Hill
Saltash
Saltburn
Saltburn-by-the-Sea
Saltby
Saltcoats
Saltcotes
Saltdean
Salterforth
Salterswall
Saltfleet
Saltfleetby All Saints
Saltfleetby St Clements
Saltfleetby St Peter
Saltford
Salthouse
Saltley
Saltmarshe
Saltney
Salton
Saltwick
Saltwood
Salvington
Salwarpe
Salwayash
Sambourne
Sambrook
Samhla
Samlesbury
Samlesbury Bottoms
Sampford Arundel
Sampford Brett
Sampford Courtenay
Sampford Peverell
Sampford Spiney
Samuelston
Sanaigmore
Sancreed
Sancton
Sand
Sand Hole
Sand Hutton
Sand Side
Sandaig
Sandbach
Sandbank
Sandbanks
Sandend
Sanderstead
Sandford
Sandford Orcas
Sandford St Martin
Sandford-on-Thames
Sandfordhill
Sandgarth
Sandgate
Sandgreen
Sandhaven
Sandhead
Sandhills
Sandhoe
Sandholme
Sandhurst
Sandhutton
Sandiacre
Sandilands
Sandiway
Sandleheath
Sandleigh
Sandling
Sandness
Sandon
Sandown
Sandplace
Sandquoy
Sandridge
Sandringham
Sandrocks
Sands End
Sandsend
Sandsound
Sandtoft
Sanduck
Sandway
Sandwich
Sandwick
Sandwith
Sandy
Sandy Haven
Sandy Lane
Sandycroft
Sandygate
Sandylands
Sandyway
Sangobeg
Sanna
Sannaig
Sanndabhaig
Sanquhar
Santon Bridge
Santon Downham
Sapcote
Sapey Common
Sapiston
Sapperton
Saracen's Head
Sarclet
Sardis
Sarisbury
Sark
Sarn
Sarn Bach
Sarn-Meyllteyrn
Sarnau
Sarnesfield
Saron
Sarratt
Sarre
Sarsden
Sartfield
Satley
Satterleigh
Satterthwaite
Sauchen
Saucher
Sauchieburn
Sauchrie
Saughall
Saughall Massie
Saughtree
Saul
Saundaig
Saundby
Saundersfoot
Saunderton
Saunton
Sausthorpe
Savalbeg
Savalmore
Sawbridgeworth
Sawdon
Sawley
Sawston
Sawtry
Saxby
Saxby All Saints
Saxelbye
Saxilby
Saxlingham
Saxlingham Green
Saxlingham Nethergate
Saxlingham Thorpe
Saxmundham
Saxon Street
Saxondale
Saxtead Green
Saxtead Little Green
Saxthorpe
Saxton
Sayers Common
Scackleton
Scadabhagh
Scaftworth
Scagglethorpe
Scalasaig
Scalby
Scaldwell
Scale Houses
Scaleby
Scalebyhill
Scales
Scalford
Scaling
Scallasaig
Scallastle
Scalloway
Scamadale
Scamblesby
Scampston
Scampton
Scaniport
Scapa
Scar
Scarborough
Scarcewater
Scarcliffe
Scarcroft
Scardroy
Scarff
Scarfskerry
Scargill
Scarinish
Scaris-brick
Scarning
Scarrington
Scarth Hill
Scartho
Scatraig
Scaur
Scawby
Scawton
Scayne's Hill
Scealascro
Scethrog
Schaw
Scholar Green
Scholes
Sciberscross
Scleddau
Sco Ruston
Scofton
Scole
Scolpaig
Scolton
Sconser
Scoor
Scopwick
Scoraig
Scorborough
Scorrier
Scorriton
Scorton
Scotby
Scotch Corner
Scotforth
Scothern
Scotland Gate
Scotlandwell
Scotnish
Scots' Gap
Scotsburn
Scotston
Scotstown
Scotter
Scotterthorpe
Scottlethorpe
Scotton
Scottow
Scoulton
Scourie
Scourie More
Scousburgh
Scrabster
Scrainwood
Scrane End
Scraptoft
Scratby
Scrayingham
Scredington
Scremby
Scremerston
Screveton
Scriven
Scrooby
Scropton
Scrub Hill
Scruton
Sculthorpe
Scunthorpe
Sea Palling
Seabank
Seaborough
Seacombe
Seacroft
Seafield
Seaford
Seaforth
Seagrave
Seaham
Seahouses
Seal
Sealand
Seale
Seamer
Seamill
Searby
Seasalter
Seascale
Seathwaite
Seatoller
Seaton
Seaton Burn
Seaton Carew
Seaton Delaval
Seaton Junction
Seaton Ross
Seaton Sluice
Seatown
Seave Green
Seaview
Seaville
Seavington St Mary
Seavington St Michael
Seawick
Sebastopol
Sebergham
Seckington
Second Coast
Sedbergh
Sedbury
Sedbusk
Sedgeberrow
Sedgebrook
Sedgefield
Sedgeford
Sedgehill
Sedgley
Sedgwick
Sedlescombe
Sedlescombe Street
Seend
Seend Cleeve
Seer Green
Seething
Sefton
Seghill
Seighford
Seilebost
Seion
Seisdon
Seisiadar
Selattyn
Selborne
Selby
Selham
Selkirk
Sellack
Sellafield
Sellafirth
Sellindge
Sells Green
Selly Oak
Selmeston
Selsdon
Selsey
Selsfield Common
Selside
Selstead
Selston
Selworthy
Semblister
Semer
Semington
Semley
Send Marsh
Senghenydd
Sennen
Sennen Cove
Sennybridge
Senwick
Sequer's Bridge
Sessay
Setchey
Setley
Setter
Settiscarth
Settle
Settrington
Seven Kings
Seven Sisters
Seven Sisters Road
Seven Springs
Sevenhampton
Sevenoaks
Sevenoaks Weald
Severn Beach
Severn Stoke
Sevington
Sewards End
Sewardstone
Sewerby
Seworgan
Sewstern
Sexhow
Sgarasta Mhor
Sgiogarstaigh
Sgodachail
Shabbington
Shackerley
Shackerstone
Shackleford
Shacklewell
Shadfen
Shadforth
Shadingfield
Shadoxhurst
Shadwell
Shaftesbury
Shaftesbury Avenue
Shafton
Shalbourne
Shalcombe
Shalden
Shaldon
Shalfleet
Shalford
Shalford Green
Shallowford
Shalmsford Street
Shalmstry
Shalstone
Shalunt
Shambellie
Shamley Green
Shandon
Shandwick
Shangton
Shankend
Shankhouse
Shanklin
Shannochie
Shantron
Shantullich
Shanzie
Shap
Shapwick
Shardlow
Shareshill
Sharlston
Sharnbrook
Sharnford
Sharoe Green
Sharow
Sharpenhoe
Sharperton
Sharpness
Sharpthorne
Sharrington
Shatterford
Shaugh Prior
Shavington
Shaw Mills
Shawbury
Shawclough
Shawell
Shawford
Shawforth
Shawhead
Shawtonhill
Sheanachie
Sheandow
Shear Cross
Shearington
Shearsby
Shebbear
Shebdon
Shebster
Shedfield
Sheen
Sheepscombe
Sheepstor
Sheepwash
Sheepway
Sheepy Magna
Sheepy Parva
Sheering
Sheerness
Sheffield
Sheffield Bottom
Sheffield Green
Shefford
Shefford Woodlands
Sheigra
Sheinton
Shelderton
Sheldon
Sheldwich
Shelf
Shelfanger
Shelfield
Shelford
Shellachan
Shelley
Shellingford
Shellow Bowells
Shelsley Beauchamp
Shelsley Walsh
Shelton
Shelton Green
Shelve
Shelwick
Shenfield
Shenington
Shenley
Shenley Brook End
Shenley Church End
Shenleybury
Shenmore
Shennanton
Shenstone
Shenstone Woodend
Shenton
Shenval
Shepeau Stow
Shephall
Shepherd's Green
Shepherds Bush
Shepherdswell or Sibertswold
Shepley
Sheppardstown
Shepperdine
Shepperton
Shepreth
Shepshed
Shepton Beauchamp
Shepton Mallet
Shepton Montague
Shepway
Sheraton
Sherborne
Sherborne St John
Sherbourne
Sherburn
Sherburn in Elmet
Shere
Shereford
Sherfield English
Sherfield on Loddon
Sherford
Sheriff Hutton
Sheriffhales
Sheringham
Sherington
Shernborne
Sherramore
Sherrington
Sherston
Sherwood Green
Shettleston
Shevington
Shevington Moor
Sheviock
Shiel Bridge
Shieldaig
Shieldhill
Shielfoot
Shielhill
Shiels
Shifford
Shifnal
Shilbottle
Shildon
Shillingford
Shillingford St George
Shillingstone
Shillington
Shillmoor
Shilstone
Shilton
Shimpling
Shimpling Street
Shincliffe
Shiney Row
Shinfield
Shingay
Shingle Street
Shinner's Bridge
Shinness Lodge
Shipbourne
Shipdham
Shipham
Shiphay
Shiplake
Shipley
Shipley Bridge
Shipmeadow
Shippon
Shipston on Stour
Shipton
Shipton Bellinger
Shipton Gorge
Shipton Green
Shipton Moyne
Shipton-on-Cherwell
Shipton-under-Wychwood
Shiptonthorpe
Shirburn
Shirdley Hill
Shire Oak
Shirebrook
Shirehampton
Shiremoor
Shirenewton
Shireoaks
Shirl Heath
Shirland
Shirley
Shirrell Heath
Shirwell
Shirwell Cross
Shiskine
Shobdon
Shobrooke
Shocklach
Shoeburyness
Sholden
Sholing
Shoot Hill
Shooter's Hill
Shop
Shop Corner
Shoreditch
Shoreham
Shoreham-by-Sea
Shoresdean
Shoreswood
Shoretown
Shorncote
Shorne
Shorne Ridgeway
Short Green
Short Heath
Shortacombe
Shortgate
Shortgrove
Shortlanesend
Shorwell
Shoscombe
Shotesham
Shotgate
Shotley
Shotley Bridge
Shotley Gate
Shotleyfield
Shottenden
Shottermill
Shottery
Shotteswell
Shottisham
Shottle
Shottlegate
Shotton
Shotton Colliery
Shotts
Shotwick
Shoughlaige-e-Caine
Shouldham
Shouldham Thorpe
Shoulton
Shover's Green
Shrawardine
Shrawley
Shrewley
Shrewsbury
Shrewton
Shripney
Shrivenham
Shropham
Shrub End
Shucknall
Shudy Camps
Shurdington
Shurlock Row
Shurrery
Shurton
Shustoke
Shut Heath
Shute
Shutford
Shuthonger
Shutlanger
Shuttington
Shuttlewood
Shuttleworth
Siabost
Siadar Iarach
Siadar Uarach
Sibbaldbie
Sibbertoft
Sibdon Carwood
Sibford Ferris
Sibford Gower
Sible Hedingham
Sibsey
Sibson
Sibster
Sibthorpe
Sibton
Sicklesmere
Sicklinghall
Sidbury
Sidcot
Sidcup
Siddington
Sidemoor
Sidestrand
Sidford
Sidlesham
Sidley
Sidlowbridge
Sidmouth
Siefton
Sigford
Sigglesthorne
Sigingstone
Silchester
Sileby
Silecroft
Silfield
Silian
Silk Willoughby
Silkstone
Silkstone Common
Silksworth
Silloth
Sillyearn
Silpho
Silsden
Silsoe
Silton
Silver End
Silver Hill
Silverburn
Silvercraigs
Silverdale
Silverley's Green
Silvermoss
Silverstone
Silverton
Silvertown
Silvington
Silwick
Simonburn
Simonsbath
Simonstone
Simprim
Simpson
Sinclair's Hill
Sinclairston
Sinderby
Sinderhope
Sindlesham
Singdean
Singleton
Singlewell or Ifield
Sinnahard
Sinnington
Sinton Green
Sipson
Sirhowy
Sisland
Sissinghurst
Siston
Sithney
Sittingbourne
Siulaisiadar
Six Ashes
Six Mile Bottom
Sixhills
Sixmile Cottages
Sixpenny Handley
Sizewell
Skail
Skaill
Skares
Skarpigarth
Skateraw
Skaw
Skeabost
Skeabrae
Skeeby
Skeffington
Skeffling
Skegby
Skegness
Skelberry
Skelbo
Skeldon
Skeldyke
Skellingthorpe
Skellister
Skellow
Skelmanthorpe
Skelmersdale
Skelmonae
Skelmorlie
Skelmuir
Skelton
Skelton Green
Skelwick
Skelwith Bridge
Skendleby
Skenfrith
Skerne
Skeroblingarry
Skerray
Sketty
Skewen
Skewsby
Skeyton
Skidbrooke
Skidby
Skilgate
Skillington
Skinburness
Skinidin
Skinnet
Skinningrove
Skipness
Skipsea
Skipton
Skipton-on-Swale
Skipwith
Skirbeck
Skirling
Skirmett
Skirpenbeck
Skirwith
Skirza
Skulamus
Skullomie
Skye of Curr
Slack
Slackhall
Slackhead
Slad
Slade
Slade Green
Slaggyford
Slaidburn
Slains Park
Slaithwaite
Slaley
Slamannan
Slapton
Slate Haugh
Slatenber
Slattadale
Slattocks
Slaugham
Slaughden
Slaughterford
Slawston
Sleaford
Sleagill
Sleapford
Sledge Green
Sledmere
Sleights
Slepe
Slickly
Sliddery
Sliemore
Sligachan
Slimbridge
Slindon
Slinfold
Slingsby
Slioch
Slip End
Slipton
Sloane Square
Slochd
Slockavullin
Slogarie
Sloley
Slongaber
Sloothby
Slough
Sluggan
Slyne
Smailholm
Small Dole
Small Hythe
Smallbridge
Smallburgh
Smallburn
Smalley
Smallfield
Smallridge
Smallthorne
Smallworth
Smannell
Smardale
Smarden
Smaull
Smeale
Smeatharpe
Smeeth
Smeeton Westerby
Smelthouses
Smerral
Smethwick
Smirisary
Smisby
Smith End Green
Smith's Green
Smithfield
Smithincott
Smithtown
Smithy Green
Smug Oak
Smyrton
Smythe's Green
Snailbeach
Snailwell
Snainton
Snaith
Snape
Snape Green
Snaresbrook
Snarestone
Snarford
Snargate
Snave
Sneachill
Snead
Sneaton
Sneatonthorpe
Snelland
Snellings
Snelston
Snetterton
Snettisham
Snibston
Snig's End
Snishival
Snitter
Snitterby
Snitterfield
Snitton
Snodhill
Snodland
Snowshill
Soar
Soberton
Soberton Heath
Sockburn
Sodylt Bank
Soham
Soho
Solas
Soldon Cross
Soldridge
Sole Street
Solihull
Solihull Lodge
Sollers Dilwyn
Sollers Hope
Sollom
Solsgirth
Solva
Somerby
Somercotes
Somerford Keynes
Somerley
Somerleyton
Somers Town
Somersal Herbert
Somersby
Somersham
Somerton
Sompting
Sonning
Sonning Common
Sonning Eye
Sopley
Sopworth
Sorbie
Sordale
Sorisdale
Sorn
Sornhill
Soroba
Sortat
Sotby
Sots Hole
Sotterly
Soudley
Soughton
Soulbury
Soulby
Souldern
Souldrop
Sound
Soundwell
Sourhope
Sourin
Sourton
Soutergate
South Acre
South Acton
South Allington
South Alloa
South Ambersham
South Anston
South Ascot
South Ballachulish
South Balloch
South Bank
South Barrow
South Beddington
South Benfleet
South Bersted
South Blackbog
South Bowood
South Brent
South Brewham
South Broomhill
South Burlingham
South Cadbury
South Cairn
South Carlton
South Cave
South Cerney
South Chard
South Charlton
South Cheriton
South Cliffe
South Clifton
South Cockerington
South Common
South Cornelly
South Corrygills
South Cove
South Creake
South Croxton
South Dalton
South Darenth
South Duffield
South Ealing
South Elkington
South Elmsall
South End
South Erradale
South Fambridge
South Fawley
South Ferriby
South Garth
South Godstone
South Gorley
South Green
South Hackney
South Hall
South Hampstead
South Hanningfield
South Harrow
South Harting
South Hayling
South Heath
South Heighton
South Hetton
South Hiendley
South Hill
South Hinksey
South Hole
South Holmwood
South Hornchurch
South Hourat
South Huish
South Hykeham
South Hylton
South Kelsey
South Kensington
South Kessock
South Killingholme
South Kilvington
South Kilworth
South Kirkby
South Kirkton
South Kyme
South Lambeth
South Lancing
South Ledaig
South Leigh
South Leverton
South Littleton
South Lopham
South Luffenham
South Malling
South Marston
South Milford
South Milton
South Mimms
South Molton
South Moor
South Moreton
South Mundham
South Muskham
South Newbald
South Newington
South Newton
South Normanton
South Norwood
South Nutfield
South Ockendon
South Ormsby
South Otterington
South Oxhey
South Park
South Perrott
South Petherton
South Petherwin
South Pickenham
South Pool
South Quay
South Queensferry
South Radworthy
South Rauceby
South Raynham
South Redbriggs
South Reston
South Runcton
South Scarle
South Shian
South Shields
South Skirlaugh
South Somercotes
South Stainley
South Stoke
South Street
South Tawton
South Thoresby
South Tidworth
South Tottenham
South Town
South Upper Barrack
South View
South Walsham
South Warnborough
South Weald
South Weston
South Wheatley
South Widcombe
South Wigston
South Willesborough
South Willingham
South Wimbledon
South Wingate
South Wingfield
South Witham
South Wonston
South Woodford
South Woodham Ferrers
South Wootton
South Wraxall
South Yardley
South Zeal
Southall
Southam
Southampton
Southbar
Southborough
Southbourne
Southburgh
Southburn
Southchurch
Southcott
Southdean
Southease
Southend
Southend-on-Sea
Southerndown
Southerness
Southery
Southfields
Southfleet
Southgate
Southill
Southington
Southleigh
Southminster
Southmuir
Southoe
Southolt
Southorpe
Southowram
Southport
Southrepps
Southrey
Southrop
Southrope
Southsea
Southstoke
Southtown
Southwaite
Southwark
Southwark Cathedral
Southwater
Southway
Southwell
Southwick
Southwold
Southwood
Sowerby
Sowerby Bridge
Sowerby Row
Sowton
Soyal
Spa Common
Spalding
Spaldington
Spaldwick
Spalefield
Spalford
Spanby
Sparham
Spark Bridge
Sparkford
Sparkwell
Sparrow's Green
Sparrowpit
Sparsholt
Spartylea
Spaunton
Spaxton
Spean Bridge
Speddoch
Speen
Speeton
Speke
Speldhurst
Spellbrook
Spelsbury
Spen Green
Spencers Wood
Spennithorne
Spennymoor
Spetchley
Spetisbury
Spexhall
Spey Bay
Speybridge
Speyview
Spilsby
Spindlestone
Spinkhill
Spinningdale
Spirthill
Spital
Spital in the Street
Spitalbrook
Spitalfields
Spithurst
Spittal
Spittal of Glenmuick
Spittal of Glenshee
Spittalfield
Spixworth
Spofforth
Spondon
Spooner Row
Spoonley
Sporle
Spott
Spratton
Spreakley
Spreyton
Spridlington
Springburn
Springfield
Springholm
Springkell
Springleys
Springside
Springthorpe
Springwell
Sproatley
Sproston Green
Sprotbrough
Sproughton
Sprouston
Sprowston
Sproxton
Spurstow
Square Point
Squires Gate
Sron Doire
Sronphadruig Lodge
St Abbs
St Agnes
St Albans
St Allen
St Andrews
St Andrews Major
St Ann's
St Ann's Chapel
St Anne's
St Anthony
St Arvans
St Asaph
St Athan
St Audries
St Austell
St Bees
St Blazey
St Blazey Gate
St Boswells
St Breock
St Brelades
St Breward
St Briavels
St Bride's-super-Ely
St Brides
St Brides Major
St Brides Netherwent
St Brides Wentlooge
St Budeaux
St Buryan
St Catherine
St Catherines
St Clears
St Cleer
St Clement
St Clether
St Columb Major
St Columb Minor
St Columb Road
St Combs
St Cross South Elmham
St Cyrus
St David's
St Davids
St Day
St Decumans
St Dennis
St Dogmaels
St Dogwells
St Dominick
St Donats
St Edith's Marsh
St Endellion
St Enoder
St Erme
St Erth
St Erth Praze
St Ervan
St Eval
St Ewe
St Fagans
St Fergus
St Fillans
St Florence
St Gennys
St George
St George's
St Georges
St Germans
St Giles in the Wood
St Giles on the Heath
St Harmon
St Helen Auckland
St Helen's
St Helena
St Helens
St Helier
St Hilary
St Illtyd
St Ippollitts
St Ishmael
St Ishmael's
St Issey
St Ive
St Ives
St James South Elmham
St James's Park
St John
St John's
St John's Chapel
St John's Fen End
St John's Highway
St John's Kirk
St John's Town of Dalry
St John's Wood
St Judes
St Just
St Just in Roseland
St Katherines
St Keverne
St Kew
St Kew Highway
St Keyne
St Lawrence
St Leonard's Street
St Leonards
St Leonards Grange
St Levan
St Luke's
St Lythans
St Mabyn
St Margaret South Elmham
St Margaret's at Cliffe
St Margaret's Hope
St Margarets
St Mark's
St Martin
St Martin's
St Martins
St Mary Bourne
St Mary Church
St Mary Cray
St Mary Hill
St Mary in the Marsh
St Mary's
St Mary's Bay
St Mary's Croft
St Mary's Grove
St Mary's Hoo
St Marychurch
St Mawes
St Mawgan
St Mellion
St Mellons
St Merryn
St Mewan
St Michael Caerhays
St Michael Penkevil
St Michael South Elmham
St Michael's on Wyre
St Michaels
St Minver
St Monans
St Neot
St Neots
St Nicholas
St Nicholas at Wade
St Ninians
St Osyth
St Owen's Cross
St Pancras
St Paul's
St Paul's Cray
St Paul's Walden
St Peter Port
St Peter's
St Petrox
St Pinnock
St Quivox
St Sampsons
St Stephen
St Stephen's
St Stephens
St Teath
St Tudy
St Twynnells
St Veep
St Vigeans
St Wenn
St Weonards
Stableford
Stackhouse
Stackpole
Stacksteads
Staddiscombe
Staddlethorpe
Stadhampton
Stadhlaigearraidh
Staffield
Staffin
Stafford
Stagden Cross
Stagsden
Stagshaw Bank
Stain
Stainburn
Stainby
Staincross
Staindrop
Staines
Stainfield
Stainforth
Staining
Stainland
Stainsacre
Stainton
Stainton by Langworth
Stainton le Vale
Stainton with Adgarley
Staintondale
Stair
Staithes
Stake Pool
Stakeford
Stalbridge
Stalbridge Weston
Stalham
Stalham Green
Stalisfield Green
Stalling Busk
Stallingborough
Stalmine
Stalybridge
Stambourne
Stamford
Stamford Bridge
Stamford Brook
Stamford Hill
Stamfordham
Stanborough
Stanbridge
Stanbridge Earls
Stanbury
Stand
Standburn
Standeford
Standen
Standford
Standish
Standlake
Standon
Stane
Stanfield
Stanford
Stanford Bishop
Stanford Bridge
Stanford Dingley
Stanford in the Vale
Stanford on Avon
Stanford on Soar
Stanford on Teme
Stanford Rivers
Stanford-le-Hope
Stanghow
Stanground
Stanhoe
Stanhope
Stanion
Stanley
Stanley Common
Stanmer
Stanmore
Stannersburn
Stanningfield
Stannington
Stansbatch
Stansfield
Stanstead
Stanstead Abbots
Stansted
Stansted Mountfitchet
Stanton
Stanton by Bridge
Stanton by Dale
Stanton Drew
Stanton Fitzwarren
Stanton Harcourt
Stanton Hill
Stanton in Peak
Stanton Lacy
Stanton Long
Stanton Prior
Stanton St Bernard
Stanton St John
Stanton St Quintin
Stanton Street
Stanton under Bardon
Stanton upon Hine Heath
Stanton Wick
Stanton-on-the-Wolds
Stanwardine in the Fields
Stanway
Stanwell
Stanwell Moor
Stanwick
Stanwix
Stanydale
Staoinebrig
Stape
Stapehill
Stapeley
Staple
Staple Cross
Staple Fitzpaine
Staplefield
Stapleford
Stapleford Abbotts
Stapleford Tawney
Staplegrove
Staplehurst
Staplers
Stapleton
Stapley
Staploe
Staplow
Starbotton
Starcross
Starling's Green
Starr
Starston
Startforth
Startley
Statham
Stathe
Stathern
Station Town
Staughton Green
Staughton Highway
Staunton
Staunton Harold Hall
Staunton on Arrow
Staunton on Wye
Staveley
Staveley-in-Cartmel
Staverton
Staverton Bridge
Stawell
Stawley
Staxigoe
Staxton
Staylittle
Staynall
Staythorpe
Stean
Steane
Stearsby
Steart
Stebbing
Stebbing Green
Stedham
Steel Cross
Steele Road
Steen's Bridge
Steep
Steeple
Steeple Ashton
Steeple Aston
Steeple Barton
Steeple Bumpstead
Steeple Claydon
Steeple Gidding
Steeple Langford
Steeple Morden
Steepmarsh
Steeton
Steinmanhill
Stella
Stelling Minnis
Stemster
Stenalees
Stenhousemuir
Stenigot
Stenness
Stenscholl
Stenton
Stepaside
Stepney
Stepney Green
Steppingley
Stepps
Sternfield
Sterridge
Stert
Stetchworth
Stevenage
Stevenston
Steventon
Stevington
Stewartby
Stewarton
Stewkley
Stewton
Steyning
Steynton
Stibb
Stibb Cross
Stibb Green
Stibbard
Stibbington
Stichill
Sticker
Stickford
Sticklepath
Stickney
Stiffkey
Stifford's Bridge
Stillingfleet
Stillington
Stilton
Stinchcombe
Stinsford
Stirchley
Stirkoke House
Stirling
Stirton
Stisted
Stithians
Stittenham
Stivichall
Stix
Stixwould
Stoak
Stobo
Stoborough
Stoborough Green
Stobwood
Stock Green
Stock Lane
Stock Wood
Stockbridge
Stockbury
Stockcross
Stockdalewath
Stockerston
Stocking Pelham
Stockingford
Stockland
Stockland Bristol
Stockleigh English
Stockleigh Pomeroy
Stockley
Stocklinch
Stockport
Stocksbridge
Stocksfield
Stockton
Stockton Heath
Stockton on Teme
Stockton on the Forest
Stockton-on-Tees
Stockwell
Stockwood
Stodday
Stodmarsh
Stody
Stoer
Stoford
Stogumber
Stogursey
Stoke
Stoke Abbott
Stoke Albany
Stoke Ash
Stoke Bardolph
Stoke Bliss
Stoke Bruerne
Stoke by Clare
Stoke Canon
Stoke Charity
Stoke Climsland
Stoke D'Abernon
Stoke Doyle
Stoke Dry
Stoke Ferry
Stoke Fleming
Stoke Gabriel
Stoke Gifford
Stoke Golding
Stoke Goldington
Stoke Hammond
Stoke Heath
Stoke Holy Cross
Stoke Lacy
Stoke Lyne
Stoke Mandeville
Stoke Newington
Stoke on Tern
Stoke Orchard
Stoke Poges
Stoke Prior
Stoke Rivers
Stoke Rochford
Stoke Row
Stoke St Gregory
Stoke St Mary
Stoke St Michael
Stoke St Milborough
Stoke sub Hambon
Stoke Talmage
Stoke Trister
Stoke Wake
Stoke-by-Nayland
Stoke-on-Trent
Stokeford
Stokeham
Stokeinteignhead
Stokenchurch
Stokenham
Stokesay
Stokesby
Stokesley
Stolford
Ston Easton
Stonar Cut
Stondon Massey
Stone
Stone Allerton
Stone Cross
Stone House
Stone Street
Stonebridge
Stonebridge Park
Stonebroom
Stoneferry
Stonefield
Stonegate
Stonegrave
Stonehaugh
Stonehaven
Stonehouse
Stoneleigh
Stonely
Stoner Hill
Stones Green
Stonesby
Stonesfield
Stonestreet Green
Stoney Cross
Stoney Houghton
Stoney Middleton
Stoney Stanton
Stoney Stoke
Stoney Stratton
Stoney Stretton
Stoneyburn
Stoneygate
Stoneyhills
Stoneykirk
Stoneywood
Stonganess
Stonham Aspal
Stonnall
Stonor
Stonton Wyville
Stony Stratford
Stonybreck
Stonyhurst College
Stoodleigh
Stopham
Stopsley
Stoptide
Storeton
Stornoway
Storridge
Storrington
Storth
Storwood
Stotfield
Stotfold
Stottesdon
Stoughton
Stoul
Stoulton
Stour Provost
Stour Row
Stourbridge
Stourpaine
Stourport-on-Severn
Stourton
Stourton Caundle
Stove
Stoven
Stow
Stow Bardolph
Stow Bedon
Stow cum Quy
Stow Longa
Stow Maries
Stow-on-the-Wold
Stowbridge
Stowe
Stowell
Stowey
Stowford
Stowlangtoft
Stowmarket
Stowting
Stowupland
Stracathro
Strachan
Strachur
Stradbroke
Stradishall
Stradsett
Stragglethorpe
Straiton
Straloch
Stramshall
Strand
Strang
Strannda
Stranraer
Strata Florida
Stratfield Mortimer
Stratfield Saye
Stratfield Turgis
Stratford
Stratford Marsh
Stratford St Andrew
Stratford St Mary
Stratford sub Castle
Stratford Tony
Stratford-upon-Avon
Strath
Strathan
Strathaven
Strathblane
Strathdon
Strathgirnock
Strathkanaird
Strathkinness
Strathmiglo
Strathpeffer
Strathtay
Strathwhillan
Strathy
Strathyre
Stratton
Stratton Audley
Stratton St Margaret
Stratton St Michael
Stratton Strawless
Stratton-on-the-Fosse
Stravanan
Stravithie
Streat
Streatham
Streatham Common
Streatham Hill
Streatley
Street Dinas
Street End
Street on the Fosse
Streethay
Streetlam
Streetly
Strefford
Strensall
Strensham
Stretcholt
Strete
Stretford
Stretford Court
Strethall
Stretham
Strettington
Stretton
Stretton en le Field
Stretton Grandison
Stretton Heath
Stretton Sugwas
Stretton under Fosse
Stretton Westwood
Stretton-on-Dunsmore
Stretton-on-Fosse
Stribers
Strichen
Stringston
Strixton
Stroat
Stromeferry
Stromemore
Stromness
Stronachlachar
Strone
Stronenaba
Stronlonag
Stronmilchan
Strontian
Strontoiller
Stronvar
Strood
Strood Green
Stroquhan
Stroud
Stroud Common
Stroud Green
Stroul
Stroxton
Struan
Strubby
Strumpshaw
Struthers
Struy
Stryt-issa
Stryt-yr-hwch
Stuartfield
Stubbington
Stubbins
Stubhampton
Stubley
Stubton
Stuck
Stuckbeg
Stuckgowan
Stuckindroin
Stuckreoch
Stuckton
Stud Green
Studdon
Studfold
Studham
Studholme
Studland
Studley
Studley Common
Studley Roger
Stuggadhoo
Stuntney
Stunts Green
Sturbridge
Sturmer
Sturminster Common
Sturminster Marshall
Sturminster Newton
Sturry
Sturton by Stow
Sturton le Steeple
Stuston
Stutton
Styal
Styrrup
Suainebost
Suardail
Succoth
Succothmore
Suckley
Sudborough
Sudbourne
Sudbrook
Sudbrooke
Sudbury
Sudgrove
Suffield
Sugarloaf
Sugnall
Suie Lodge Hotel
Sulby
Sulgrave
Sulham
Sulhamstead
Sullington
Sullom
Sullom Voe Oil Terminal
Sully
Sumburgh
Summer Bridge
Summer-house
Summercourt
Summerfield
Summerhill
Summerleaze
Summerseat
Summerstown
Summertown
Sunadale
Sunbury
Sundaywell
Sunderland
Sunderland Bridge
Sundhope
Sundon Park
Sundridge
Sundrum
Sunhill
Sunipol
Sunk Island
Sunningdale
Sunninghill
Sunningwell
Sunniside
Sunny Bank
Sunnylaw
Sunnymead
Sunnyside
Surbiton
Surfleet
Surfleet Seas End
Surlingham
Surrey Quays
Sustead
Susworth
Sutcombe
Suton
Sutors of Cromarty
Sutterton
Sutton
Sutton at Hone
Sutton Bassett
Sutton Benger
Sutton Bonington
Sutton Bridge
Sutton Cheney
Sutton Coldfield
Sutton Courtenay
Sutton Crosses
Sutton Grange
Sutton Green
Sutton Holms
Sutton Howgrave
Sutton in Ashfield
Sutton in the Elms
Sutton Lane Ends
Sutton le Marsh
Sutton Leach
Sutton Maddock
Sutton Mallet
Sutton Mandeville
Sutton Montis
Sutton on Sea
Sutton on the Hill
Sutton on Trent
Sutton Poyntz
Sutton Scarsdale
Sutton Scotney
Sutton St Edmund
Sutton St James
Sutton St Nicholas
Sutton upon Derwent
Sutton Valence
Sutton Veny
Sutton Waldron
Sutton Weaver
Sutton Wick
Sutton-in-Craven
Sutton-on-Hull
Sutton-on-the-Forest
Sutton-under-Brailes
Sutton-under-Whitestonecliffe
Swaby
Swadlincote
Swaffham
Swaffham Bulbeck
Swaffham Prior
Swafield
Swainby
Swainshill
Swainsthorpe
Swainswick
Swalcliffe
Swalecliffe
Swallow
Swallow Beck
Swallowcliffe
Swallowfield
Swalwell
Swampton
Swan Street
Swanage
Swanbach
Swanbourne
Swanbridge
Swancote
Swanland
Swanlaws
Swanley
Swanmore
Swannington
Swanscombe
Swansea
Swanton Abbot
Swanton Morley
Swanton Novers
Swanwick
Swarby
Swardeston
Swarkestone
Swarland
Swaton
Swavesey
Sway
Swayfield
Swaythling
Swaythorpe
Sweetshouse
Sweffling
Swell
Swepstone
Swerford
Swettenham
Swffryd
Swiftsden
Swilland
Swillbrook
Swillington
Swimbridge
Swimbridge Newland
Swinbrook
Swincliffe
Swinderby
Swindon
Swinefleet
Swineshead
Swineshead Bridge
Swiney
Swinford
Swingfield Minnis
Swinhoe
Swinhope
Swining
Swinithwaite
Swinscoe
Swinside Hall
Swinstead
Swinton
Swintonmill
Swiss Cottage
Swithland
Swordale
Swordland
Swordle
Swordly
Sworton Heath
Swyddffynnon
Swynnerton
Swyre
Syde
Sydenham
Sydenham Damerel
Sydenham Hill
Syderstone
Sydling St Nicholas
Sydmonton
Syerston
Syke
Sykehouse
Sykes
Sylen
Symbister
Symington
Symonds Yat
Symondsbury
Synod Inn
Syon House
Syre
Syresham
Syston
Sytchampton
Sywell
Taagan
Tabost
Tacher
Tackley
Tacleit
Tacolneston
Tadcaster
Tadden
Taddington
Taddiport
Tadley
Tadlow
Tadmarton
Tadworth
Tafarn-y-bwlch
Tafarn-y-Gelyn
Tafarnaubach
Taffs Well
Tafolwern
Tai'n Lon
Tai'r Bull
Taibach
Tain
Tairlaw
Takeley
Takeley Street
Tal-sarn
Tal-y-bont
Tal-y-Cae
Tal-y-cafn
Tal-y-llyn
Tal-y-wern
Talachddu
Talacre
Talardd
Talaton
Talbenny
Talbot Green
Talerddig
Talgarreg
Talgarth
Taliesin
Talisker
Talke
Talkin
Talla Bheith
Talla Linnfoots
Talladale
Tallarn Green
Tallentire
Talley
Tallington
Talmine
Talog
Talsarnau
Talskiddy
Talwrn
Talybont
Talybont-on-Usk
Talyllyn
Talysarn
Tamavoid
Tamerton Foliot
Tamworth
Tan-lan
Tan-y-fron
Tan-y-graig
Tan-y-groes
Tan-y-pistyll
Tandridge
Tanerdy
Tanfield
Tangiers
Tanglandford
Tangley
Tangmere
Tangwick
Tangy
Tankerness
Tankersley
Tannach
Tannachy
Tannadice
Tannington
Tannochside
Tansley
Tansor
Tantobie
Tanton
Tanworth in Arden
Tanygrisiau
Taobh a'Deas Loch Baghasdail
Taobh Siar
Tapeley
Taplow
Taravocan
Tarbat Ho.
Tarbert
Tarbet
Tarbolton
Tarbrax
Tardebigge
Tardy Gate
Tarfside
Tarland
Tarleton
Tarlscough
Tarlton
Tarnbrook
Tarnock
Tarporley
Tarr
Tarrant Crawford
Tarrant Gunville
Tarrant Hinton
Tarrant Keyneston
Tarrant Launceston
Tarrant Monkton
Tarrant Rawston
Tarrant Rushton
Tarrel
Tarring Neville
Tarrington
Tarrnacraig
Tarsappie
Tarskavaig
Tarves
Tarvie
Tarvin
Tarvin Sands
Tasburgh
Tasley
Taston
Tatenhill
Tatham
Tathwell
Tatsfield
Tattenhall
Tatterford
Tattersett
Tattershall
Tattershall Bridge
Tattershall Thorpe
Tattingstone
Tatworth
Tauchers
Taunton
Tavelty
Taverham
Tavern-spite
Tavistock
Taw Bridge
Taw Green
Tawstock
Taxal
Tayburn
Taychreggan
Tayinloan
Taylors Cross
Taynafead
Taynish
Taynton
Taynuilt
Tayock
Tayovullin
Tayport
Tayvallich
Tealby
Team Valley
Teanamachar
Teangue
Teasses
Tebay
Tebworth
Tedburn St Mary
Teddington
Tedstone Delamere
Tedstone Wafre
Teeton
Teffont Evias
Teffont Magna
Tegryn
Teigh
Teigngrace
Teignmouth
Telford
Telham
Tellisford
Telscombe
Telscombe Cliffs
Tempar
Templand
Temple
Temple Bar
Temple Cloud
Temple Ewell
Temple Grafton
Temple Guiting
Temple Hirst
Temple Mills
Temple Normanton
Temple Sowerby
Templecombe
Templeton
Templeton Bridge
Templewood
Tempsford
Ten Mile Bank
Tenbury Wells
Tenby
Tendring
Tenga
Tenterden
Terally
Terling
Ternhill
Terregles
Terrington
Terrington St Clement
Terrington St John
Teston
Testwood
Tetbury
Tetbury Upton
Tetchill
Tetcott
Tetford
Tetney
Tetney Lock
Tetsworth
Tettenhall
Tettenhall Wood
Tetworth
Teuchan
Teversal
Teversham
Teviothead
Tewel
Tewin
Tewkesbury
Teynham
Thainston
Thainstone
Thakeham
Thame
Thames Ditton
Thames Haven
Thamesmead
Thanington
Thankerton
Tharston
Thatcham
Thatto Heath
Thaxted
The Bage
The Banking
The Bar
The Birks
The Bog
The Bourne
The Bratch
The Bryn
The Burf
The Burn
The Camp
The Chequer
The City
The Common
The Craigs
The Cronk
The Den
The Dicker
The Drums
The Eaves
The Folly
The Haven
The Hermitage
The Howe
The Hyde
The Isle
The Knowle
The Laurels
The Leacon
The Lee
The Lhen
The Lodge
The Marsh
The Moor
The Mumbles
The Mythe
The Neuk
The Node
The Oval
The Rhos
The Rowe
The Sands
The Shoe
The Smithies
The Stocks
The Vauld
The Wrythe
The Wyke
Theakston
Thealby
Theale
Thearne
Theberton
Thedden Grange
Theddingworth
Theddlethorpe All Saints
Theddlethorpe St Helen
Thelbridge Barton
Thelnetham
Thelveton
Thelwall
Themelthorpe
Thenford
Therfield
Thetford
Theydon Bois
Thickwood
Thimbleby
Thirkleby
Thirlby
Thirlestane
Thirn
Thirsk
Thistleton
Thistley Green
Thixendale
Thockrington
Tholomas Drove
Tholthorpe
Thomas Chapel
Thomastown
Thompson
Thomshill
Thong
Thoralby
Thoresby
Thoresway
Thorganby
Thorgill
Thorington
Thorington Street
Thorlby
Thorley
Thorley Street
Thormanby
Thorn Falcon
Thornaby-on-Tees
Thornage
Thornborough
Thornbury
Thornby
Thorncliff
Thorncombe
Thorncombe Street
Thorncote Green
Thorndon
Thorne
Thorne St Margaret
Thorner
Thornes
Thorney
Thorney Hill
Thornford
Thorngrove
Thorngumbald
Thornham
Thornham Magna
Thornham Parva
Thornhaugh
Thornhill
Thornholme
Thornicombe
Thornley
Thornliebank
Thorns
Thornsett
Thornthwaite
Thornton
Thornton Cross
Thornton Curtis
Thornton Hough
Thornton le Moor
Thornton Park
Thornton Rust
Thornton Steward
Thornton Watlass
Thornton-in-Craven
Thornton-le-Beans
Thornton-le-Clay
Thornton-le-Dale
Thornton-le-Moor
Thornton-le-Moors
Thornton-le-Street
Thorntonhall
Thorntonloch
Thornwood Common
Thornyhill
Thornylee
Thoroton
Thorp Arch
Thorpe
Thorpe Abbotts
Thorpe Acre
Thorpe Arnold
Thorpe Audlin
Thorpe Bassett
Thorpe Bay
Thorpe by Water
Thorpe Constantine
Thorpe Culvert
Thorpe End Garden Village
Thorpe Green
Thorpe Hall
Thorpe Hesley
Thorpe in Balne
Thorpe Langton
Thorpe Larches
Thorpe le Street
Thorpe Malsor
Thorpe Mandeville
Thorpe Market
Thorpe Morieux
Thorpe on the Hill
Thorpe Salvin
Thorpe Satchville
Thorpe St Andrew
Thorpe St Peter
Thorpe Thewles
Thorpe Tilney Dales
Thorpe Underwood
Thorpe Waterville
Thorpe Willoughby
Thorpe-le-Soken
Thorpeness
Thorpland
Thorrington
Thorverton
Thrandeston
Thrapston
Threapland
Threapwood
Three Bridges
Three Burrows
Three Chimneys
Three Cocks
Three Crosses
Three Cups Corner
Three Holes
Three Leg Cross
Three Legged Cross
Three Mile Cross
Threekingham
Threemilestone
Threlkeld
Threshers Bush
Threshfield
Threxton Hill
Thriepley
Thrigby
Thringarth
Thringstone
Thrintoft
Thriplow
Throcking
Throckley
Throckmorton
Throphill
Thropton
Throwleigh
Throwley
Throws
Thrumpton
Thrumster
Thrupp
Thrushelton
Thrussington
Thruxton
Thrybergh
Thulston
Thundergay
Thundersley
Thunderton
Thundridge
Thurcaston
Thurcroft
Thurdistoft
Thurgarton
Thurgoland
Thurlaston
Thurlbear
Thurlby
Thurleigh
Thurlestone
Thurloxton
Thurlstone
Thurlton
Thurmaston
Thurnby
Thurne
Thurnham
Thurning
Thurnscoe
Thursby
Thursford
Thursley
Thurso
Thurstaston
Thurston
Thurstonfield
Thurstonland
Thurton
Thurvaston
Thuster
Thuxton
Thwaite
Thwaite Head
Thwaite St Mary
Thwing
Tibbermore
Tibberton
Tibenham
Tibertich
Tibshelf
Tibthorpe
Ticehurst
Tichborne
Tickencote
Tickenham
Tickhill
Ticklerton
Ticknall
Tickton
Tidcombe
Tiddington
Tidebrook
Tideford
Tidenham
Tidenham Chase
Tideswell
Tidmarsh
Tidmington
Tidpit
Tiers Cross
Tiffield
Tifty
Tigerton
Tigh a'Gearraidh
Tighachnoic
Tighnablair
Tighnabruaich
Tigley
Tilbrook
Tilbury
Tile Cross
Tile Hill
Tilehurst
Tilford
Tillathrowie
Tillers' Green
Tillery
Tilley
Tillicoultry
Tillingham
Tillington
Tillington Common
Tillyarblet
Tillybirloch
Tillycorthie
Tillydrine
Tillyfar
Tillyfour
Tillyfourie
Tillygreig
Tillypronie
Tilmanstone
Tilney All Saints
Tilney High End
Tilney St Lawrence
Tilshead
Tilstock
Tilston
Tilstone Fearnall
Tilsworth
Tilton on the Hill
Tiltups End
Timberland
Timberland Dales
Timbersbrook
Timberscombe
Timble
Timperley
Timsbury
Timsgearraidh
Timworth Green
Tincleton
Tindale
Tingewick
Tingley
Tingrith
Tingwall
Tinhay
Tinney
Tinshill
Tinsley
Tinsley Green
Tintagel
Tintern Parva
Tintinhull
Tintwistle
Tinwald
Tinwell
Tippacott
Tipperty
Tiptoe
Tipton
Tipton St John
Tiptree
Tiptree Heath
Tir-y-dail
Tirabad
Tirdeunaw
Tirindrish
Tirley
Tirphil
Tirril
Tisbury
Tissington
Tister
Titchberry
Titchfield
Titchmarsh
Titchwell
Tithby
Titley
Titsey
Titson
Tittensor
Tittleshall
Tiverton
Tivetshall St Margaret
Tivetshall St Mary
Tixall
Tixover
Toab
Tobermory
Toberonochy
Tobha Mor
Tobson
Tocher
Tockenham
Tockenham Wick
Tockholes
Tockington
Tockwith
Todber
Toddington
Todenham
Todhills
Todlachie
Todmorden
Todwick
Toft
Toft Hill
Toft Monks
Toft next Newton
Toftcarl
Toftrees
Tofts
Toftwood
Togston
Tokavaig
Tokers Green
Tolastadh
Tolastadh a'Chaolais
Tolastadh Ur
Toll of Birness
Tolland
Tollard Royal
Tollcross
Toller Down Gate
Toller Fratrum
Toller Porcorum
Toller Whelme
Tollerton
Tollesbury
Tollesby
Tolleshunt D'Arcy
Tolleshunt Knights
Tolleshunt Major
Tolpuddle
Tolvah
Tolworth
Tom an Fhuadain
Tomatin
Tombreck
Tomchrasky
Tomdoun
Tomdow
Tomich
Tomintoul
Tomnacross
Tomnamoon
Tomnaven
Tomnavoulin
Tomvaich
Ton-Pentre
Ton-teg
Tonbridge
Tondu
Tonfanau
Tong
Tong Norton
Tong Street
Tonge
Tongham
Tongland
Tongue
Tongue Ho.
Tongwynlais
Tonna
Tonwell
Tonypandy
Tonyrefail
Toot Baldon
Toot Hill
Toothill
Tooting Bec
Tooting Broadway
Tooting Graveney
Top End
Topcliffe
Topcroft
Topcroft Street
Toppesfield
Toppings
Topsham
Topsham Bridge
Torbain
Torbeg
Torbryan
Torcastle
Torcross
Tordarroch
Tore
Toreduff
Toremore
Torgyle
Torksey
Torlum
Torlundy
Tormarton
Tormisdale
Tormore
Tormsdale
Tornagrain
Tornahaish
Tornaveen
Torness
Torpenhow
Torphichen
Torphins
Torpoint
Torquay
Torquhan
Torr
Torran
Torrance
Torrancroy
Torrich
Torridon
Torrin
Torrisdale
Torrish
Torrisholme
Torroble
Torry
Torryburn
Torsonce
Torterston
Torthorwald
Tortington
Tortworth
Torvaig
Torver
Torwood
Torworth
Tosberry
Toscaig
Toseland
Tosside
Tostarie
Tostock
Totaig
Tote
Totegan
Totford
Tothill
Totland
Totley
Totnes
Toton
Totronald
Tottenham
Tottenham Court Road
Tottenham Hale
Tottenhill
Totteridge
Totteridge & Whetstone
Totternhoe
Tottington
Totton
Touchen-End
Toulton
Tovil
Tow Law
Toward
Towcester
Towednack
Tower Hamlets
Tower Hill
Tower of London
Towersey
Towie
Towiemore
Town End
Town Green
Town Row
Town Street
Town Yetholm
Townend
Townhead
Townhead of Greenlaw
Townhill
Townshend
Towthorpe
Towton
Towyn
Toy's Hill
Toynton All Saints
Toynton Fen Side
Toynton St Peter
Trabboch
Traboe
Tradespark
Trafalgar Square
Trafford Park
Trallong
Tranch
Tranent
Trantlebeg
Trantlemore
Tranwell
Trap
Traprain
Traquair
Trawden
Trawsfynydd
Tre'r-ddol
Tre-ddiog
Tre-groes
Tre-vaughan
Trealaw
Treales
Trearddur
Treaslane
Trebanog
Trebanos
Trebarrow
Trebartha
Trebarwith
Trebetherick
Treborough
Trebudannon
Trebullett
Treburley
Trebyan
Trecastle
Trecwn
Trecynon
Tredavoe
Tredegar
Tredington
Tredinnick
Tredomen
Tredrissi
Tredunnock
Treen
Treeton
Trefasser
Trefdraeth
Trefecca
Trefeglwys
Trefenter
Treffgarne
Treffynnon
Trefgarn Owen
Trefil
Trefilan
Treflach
Trefnanney
Trefnant
Trefonen
Trefor
Treforest
Treforest Ind. Est.
Trefriw
Tregadillett
Tregaian
Tregare
Tregaron
Tregarth
Tregavethan
Tregear
Tregeare
Tregeiriog
Tregele
Tregidden
Treglemais
Tregolds
Tregole
Tregonetha
Tregony
Tregoyd
Tregurrian
Tregynon
Trehafod
Treharris
Treherbert
Trekenner
Trelash
Trelassick
Trelawnyd
Trelech
Trelech a'r Betws
Treleddyd-fawr
Trelewis
Treligga
Trelights
Trelill
Trelissick
Trelleck
Trelleck Grange
Trelogan
Trelystan
Tremadog
Tremail
Tremain
Tremaine
Tremar
Trematon
Tremeirchion
Tremethick Cross
Trenance
Trenarren
Trench
Treneglos
Trenewan
Trent
Trent Park
Trentham
Trentishoe
Treoes
Trerule Foot
Tresaith
Trescott
Trescowe
Tresham
Treshnish
Tresillian
Tresinney
Tresinwen
Treskinnick Cross
Tresmeer
Tresparrett
Tresparrett Posts
Tressait
Tresta
Treswell
Trethurgy
Tretio
Tretire
Tretower
Treuddyn
Trevalga
Trevalyn
Trevanson
Trevarren
Trevarrick
Trevaughan
Trevellas
Trevelmond
Treverva
Trevescan
Trevethin
Trevigro
Trevine
Treviscoe
Trevone
Trevor
Trewalder
Trewarmett
Trewarthenick
Trewassa
Trewellard
Trewen
Trewern
Trewidland
Trewilym
Trewint
Trewithian
Trewoon
Trewornan
Treyarnon
Treyford
Triangle
Trickett's Cross
Trimdon
Trimdon Colliery
Trimdon Grange
Trimingham
Trimley St Martin
Trimley St Mary
Trimpley
Trimsaran
Trimstone
Trinafour
Trinant
Tring
Trinity
Trislaig
Trispen
Tritlington
Trochry
Troedyraur
Troedyrhiw
Trondavoe
Troon
Trosaraidh
Troston
Troswell
Trottiscliffe
Trotton
Troughend
Troustan
Troutbeck
Troutbeck Bridge
Trow Green
Trowbridge
Trowle Common
Trowley Bottom
Trows
Trowse Newton
Trudernish
Trudoxhill
Trull
Trumaisge Arraidh
Trumpan
Trumpet
Trumpington
Trunch
Trunnah
Truro
Trusham
Trusley
Trusthorpe
Truthan
Trysull
Tubney
Tuckenhay
Tuckingmill
Tuddenham
Tudeley
Tudhoe
Tudweiliog
Tuffley
Tufnell Park
Tugby
Tugford
Tughall
Tuirnaig
Tulchan
Tullibody
Tullich
Tullich Muir
Tulliemet
Tulloch
Tullochgorm
Tullochgribban High
Tullochvenus
Tulloes
Tullybannocher
Tullybelton
Tullyfergus
Tullymurdoch
Tullynessle
Tulse Hill
Tumble
Tumby
Tumby Woodside
Tummel Bridge
Tundergarth Mains
Tunga
Tunstall
Tunstead
Tunworth
Tupsley
Tupton
Tur Langton
Turbiskill
Turclossie
Turgis Green
Turin
Turkdean
Turnastone
Turnberry
Turnchapel
Turnditch
Turner's Green
Turners Hill
Turners Puddle
Turnford
Turnham Green
Turnpike Lane
Turnworth
Turret Bridge
Turriff
Turton Bottoms
Turvey
Turville
Turville Heath
Turweston
Tutbury
Tutnall
Tutshill
Tuttington
Tuxford
Twatt
Twechar
Tweedmouth
Tweedsmuir
Twelveheads
Twerton
Twickenham
Twigworth
Twineham
Twinhoe
Twinstead
Twiss Green
Twitchen
Twizell House
Two Bridges
Two Dales
Two Gates
Twycross
Twyford
Twyford Common
Twyn-y-Sheriff
Twyn-yr-odyn
Twynholm
Twyning
Twyning Green
Twynllanan
Twywell
Ty'n-y-groes
Ty-hen
Ty-mawr
Ty-nant
Tyberton
Tyburn
Tycroes
Tycrwyn
Tydd Gote
Tydd St Giles
Tydd St Mary
Tye Common
Tye Green
Tyldesley
Tyle-garw
Tyler Hill
Tylers Green
Tylorstown
Tylwch
Tyn-y-cefn
Tyn-y-Cwm
Tyn-y-ffridd
Tyn-y-graig
Tyndrum
Tyneham
Tynehead
Tynemouth
Tynewydd
Tyninghame
Tynribbie
Tynron
Tyringham
Tythegston
Tytherington
Tytherleigh
Tytherton Lucas
Tywardreath
Tywardreath Highway
Tywyn
Uachdar
Uags
Ubbeston Green
Ubley
Uckerby
Uckfield
Uckinghall
Uckington
Uddingston
Uddington
Udimore
Udny Green
Udny Station
Udstonhead
Uffcott
Uffculme
Uffington
Ufford
Ufton
Ufton Nervet
Ugborough
Uggeshall
Ugglebarnby
Ugley
Ugley Green
Ugthorpe
Uig
Uigen
Uiginish
Uigshader
Uisgebhagh
Uisken
Ulbster
Ulcat row
Ulceby
Ulceby Cross
Ulcombe
Uldale
Uley
Ulgham
Ullapool
Ullenhall
Ullenwood
Ulleskelf
Ullesthorpe
Ulley
Ullingswick
Ullinish
Ullock
Ulpha
Ulrome
Ulsta
Ulting
Ulverston
Ulwell
Ulzieside
Umberleigh
Unapool
Underbarrow
Underhoull
Underriver
Underwood
Undy
Unifirth
Union Croft
Union Mills
Unstone
Unthank
Up Cerne
Up Exe
Up Hatherley
Up Holland
Up Marden
Up Nately
Up Somborne
Up Sydling
Upavon
Upchurch
Upcott
Upend
Uphall
Uphall Station
Upham
Uphampton
Uphill
Uplawmoor
Upleadon
Upleatham
Uplees
Uploders
Uplowman
Uplyme
Upminster
Upottery
Upper Affcot
Upper Ardroscadale
Upper Arley
Upper Arncott
Upper Aston
Upper Astrop
Upper Basildon
Upper Beeding
Upper Benefield
Upper Bighouse
Upper Boat
Upper Boddington
Upper Borth
Upper Boyndlie
Upper Brailes
Upper Breinton
Upper Broughton
Upper Bucklebury
Upper Burgate
Upper Burnhaugh
Upper Caldecote
Upper Camster
Upper Catshill
Upper Chapel
Upper Chute
Upper Clapton
Upper Clatford
Upper Coberley
Upper Cound
Upper Cwmbran
Upper Dallachy
Upper Dean
Upper Denby
Upper Derraid
Upper Diabaig
Upper Dicker
Upper Dovercourt
Upper Dunsforth
Upper Eastern Green
Upper Eathie
Upper Edmonton
Upper Elkstone
Upper End
Upper Farringdon
Upper Framilode
Upper Froyle
Upper Gills
Upper Godney
Upper Gornal
Upper Gravenhurst
Upper Green
Upper Hackney
Upper Halliford
Upper Halling
Upper Hambleton
Upper Hardres Court
Upper Hartfield
Upper Hawkhillock
Upper Hayton
Upper Heath
Upper Helmsley
Upper Hergest
Upper Heyford
Upper Hill
Upper Holloway
Upper Hopton
Upper Horsebridge
Upper Hulme
Upper Inglesham
Upper Kilchattan
Upper Killay
Upper Knockando
Upper Lambourn
Upper Langwith
Upper Largo
Upper Lochton
Upper Longdon
Upper Ludstone
Upper Lybster
Upper Lydbrook
Upper Maes-coed
Upper Midhope
Upper Minety
Upper Mitton
Upper North Dean
Upper Norwood
Upper Obney
Upper Oddington
Upper Poppleton
Upper Quinton
Upper Ridinghill
Upper Rochford
Upper Sanday
Upper Sapey
Upper Seagry
Upper Shelton
Upper Sheringham
Upper Skelmorlie
Upper Slaughter
Upper Sonachan
Upper Soudley
Upper Stoke
Upper Stondon
Upper Stowe
Upper Street
Upper Sundon
Upper Swell
Upper Sydenham
Upper Tean
Upper Thurnham
Upper Tillyrie
Upper Tooting
Upper Town
Upper Tysoe
Upper Upham
Upper Upnor
Upper Victoria
Upper Walthamstow
Upper Wardington
Upper Weald
Upper Weedon
Upper Welson
Upper Wield
Upper Winchendon
Upper Woodford
Upper Wootton
Upper Wraxall
Upper Wyche
Uppermill
Upperthong
Upperton
Uppertown
Uppingham
Uppington
Upsall
Upsettlington
Upshire
Upstreet
Upton
Upton Bishop
Upton Cheyney
Upton Cressett
Upton Cross
Upton End
Upton Green
Upton Grey
Upton Hellions
Upton Lovell
Upton Magna
Upton Noble
Upton Park
Upton Pyne
Upton Scudamore
Upton Snodsbury
Upton St Leonards
Upton upon Severn
Upton Warren
Upwaltham
Upware
Upwell
Upwey
Upwood
Uradale
Urafirth
Urchany
Urchfont
Urdimarsh
Ure
Urgha
Urlay Nook
Urmston
Urquhart
Urra
Urray
Ushaw Moor
Usk
Usselby
Utley
Uton
Utterby
Uttoxeter
Uwchmynydd
Uxbridge
Uxbridge Road
Uyeasound
Uzmaston
Vale
Valley
Valley Trudde
Valleyfield
Valsgarth
Vange
Vardre
Varteg
Vatten
Vaul
Vauxhall
Vauxhall Bridge
Vaynor
Vaynor Park
Veaullt
Veensgarth
Velindre
Vellow
Venn
Venn Ottery
Vennington
Ventnor
Vernham Dean
Vernham Street
Vernolds Common
Verwig
Verwood
Veryan
Vicarage
Vickerstown
Victoria
Victoria Docks
Victoria Park
Vidlin
Viewfield
Viewpark
Vigo
Vigo Village
Villavin
Vine's Cross
Vinehall Street
Viney Hill
Virginia Water
Virginstow
Virley
Vobster
Voe
Vowchurch
Voy
Wackerfield
Wacton
Wadborough
Waddesdon
Waddingham
Waddington
Waddingworth
Wadebridge
Wadeford
Wadenhoe
Wadesmill
Wadhurst
Wadshelf
Wadsley Bridge
Wadworth
Wadworth Hill
Waen
Waen-fach
Waen-wen
Wainfleet All Saints
Wainfleet Bank
Wainhouse Corner
Wainscott
Wainstalls
Waitby
Wakefield
Wakerley
Wakes Colne
Walberswick
Walberton
Walcot
Walcot Dales
Walcot Green
Walcote
Walcott
Walden
Walden Head
Walden Stubbs
Walderslade
Walderton
Walditch
Waldley
Waldridge
Waldringfield
Waldron
Walesby
Walford
Walgherton
Walgrave
Walhampton
Walk Mill
Walkden
Walker
Walker Fold
Walker's Green
Walkerburn
Walkeringham
Walkerith
Walkern
Walkerton
Walkhampton
Walkington
Walkwood
Wall
Wall Bank
Wall Heath
Wall under Heywood
Wallacetown
Wallasey
Wallbottle
Wallend
Waller's Green
Wallingford
Wallington
Wallis
Wallisdown
Walliswood
Walls
Wallsend
Wallyford
Walmer
Walmer Bridge
Walmersley
Walmley
Walpole
Walpole Cross Keys
Walpole Highway
Walpole St Andrew
Walpole St Peter
Walsall
Walsall Wood
Walsden
Walsgrave on Sowe
Walsham le Willows
Walsoken
Walston
Walsworth
Walterstone
Waltham
Waltham Abbey
Waltham Chase
Waltham Cross
Waltham Forest
Waltham on the Wolds
Waltham St Lawrence
Walthamstow
Walthamstow Central
Walton
Walton Cardiff
Walton East
Walton on the Hill
Walton on the Wolds
Walton West
Walton-in-Gordano
Walton-le-Dale
Walton-on-Naze
Walton-on-Thames
Walton-on-the-Hill
Walton-on-Trent
Walwen
Walwick
Walworth
Walwyns Castle
Wambrook
Wanborough
Wandel
Wandsworth
Wandsworth Common
Wandsworth Road
Wandsworth Town
Wangford
Wanlip
Wanlockhead
Wannock
Wansford
Wanstead
Wanstead Park
Wanstrow
Wanswell
Wantage
Wapley
Wappenbury
Wappenham
Wapping
Warbleton
Warborough
Warboys
Warbstow
Warburton
Warcop
Ward End
Ward Green
Warden
Wardgate
Wardhouse
Wardington
Wardle
Wardley
Wardlow
Wardy Hill
Ware
Wareham
Warehorne
Waren Mill
Warenford
Warenton
Wareside
Waresley
Warfield
Wargrave
Warham
Wark
Warkleigh
Warkton
Warkworth
Warlaby
Warland
Warleggan
Warley
Warley Town
Warlingham
Warmfield
Warmingham
Warminghurst
Warmington
Warminster
Warmlake
Warmley
Warmsworth
Warmwell
Warndon
Warnford
Warnham
Warningcamp
Warninglid
Warren
Warren House
Warren Row
Warren Street
Warrington
Warroch
Warsash
Warslow
Warter
Warthill
Wartle
Wartling
Wartnaby
Warton
Warwick
Warwick Avenue
Warwick Bridge
Warwick Park
Wasbister
Wash Common
Washaway
Washbourne
Washfield
Washfold
Washford
Washford Pyne
Washingborough
Washington
Wasing
Waskerley
Wasperton
Wass
Watchet
Watchfield
Watchgate
Water
Water Eaton
Water End
Water Newton
Water Orton
Water Stratford
Water Yeat
Waterbeach
Waterbeck
Waterfall
Waterfoot
Waterford
Waterhead
Waterhill of Bruxie
Waterhouses
Wateringbury
Waterloo
Waterloo Cross
Waterloo Port
Waterlooville
Watermeetings
Watermillock
Waterperry
Waterrow
Waters Upton
Watersfield
Waterside
Waterstock
Waterston
Watford
Wath
Wath Brow
Wath upon Dearne
Watlington
Watnall
Watten
Wattisfield
Wattisham
Watton
Watton Green
Watton-at-Stone
Wattston
Wattstown
Wattsville
Waun Fawr
Waun y Clyn
Waunarlwydd
Waunclynda
Waunfawr
Wavendon
Waverbridge
Waverton
Wawne
Waxham
Waxholme
Way Village
Wayford
Waytown
Weachyburn
Weald
Wealdstone
Weare
Weare Giffard
Wearhead
Wearne
Weasenham All Saints
Weasenham St Peter
Weathercote
Weatheroak Hill
Weaverham
Weaverthorpe
Webheath
Webton
Wedderlairs
Weddington
Wedhampton
Wedmore
Wednesbury
Wednesfield
Weedon
Weedon Bec
Weedon Lois
Weeford
Week Orchard
Week St Mary
Weekley
Weeley
Weeley Heath
Weem
Weeping Cross
Weethley
Weeting
Weeton
Weir
Weirbrook
Welbeck Abbey
Welborne
Welbourn
Welburn
Welbury
Welby
Welches Dam
Welcombe
Weldon
Welford
Welford-on-Avon
Welham
Welham Green
Well End
Well Hall
Well Hill
Well Town
Welland
Wellbank
Wellesbourne
Wellhill
Welling
Wellingborough
Wellingham
Wellingore
Wellington
Wellington Heath
Wellington Marsh
Wellow
Wells
Wells-next-the-Sea
Wellsborough
Wellwood
Welney
Welsh Bicknor
Welsh End
Welsh Frankton
Welsh Hook
Welsh Newton
Welsh St Donats
Welshampton
Welshpool
Welton
Welton le Marsh
Welton le Wold
Welwick
Welwyn
Welwyn Garden City
Wem
Wembdon
Wembley
Wembury
Wembworthy
Wemyss Bay
Wenallt
Wendens Ambo
Wendlebury
Wendling
Wendover
Wendron
Wendy
Wenhaston
Wenlli
Wennington
Wensley
Wentbridge
Wentnor
Wentworth
Wentworth Castle
Wenvoe
Weobley
Weobley Marsh
Wepham
Wepre
Wereham
Wergs
Wernyrheolydd
Werrington
Wervil Brook
Wervin
Wesham
Wessington
West Aberthaw
West Acre
West Acton
West Allerdean
West Alvington
West Amesbury
West Anstey
West Ashby
West Ashling
West Ashton
West Auckland
West Ayton
West Bagborough
West Barkwith
West Barnby
West Barns
West Barsham
West Bay
West Beckham
West Benhar
West Bergholt
West Bexington
West Bilney
West Blatchington
West Boldon
West Bradenham
West Bradford
West Bradley
West Bretton
West Bridgford
West Brompton
West Bromwich
West Buckland
West Burrafirth
West Burton
West Butterwick
West Byfleet
West Cairncake
West Caister
West Calder
West Camel
West Challow
West Charleton
West Chelborough
West Chevington
West Chiltington
West Chinnock
West Clandon
West Cliffe
West Clyne
West Coker
West Compton
West Cross
West Curry
West Curthwaite
West Dean
West Deeping
West Derby
West Dereham
West Ditchburn
West Down
West Drayton
West Dulwich
West Ealing
West Edington
West Ella
West End
West End Green
West Farleigh
West Farndon
West Felton
West Finchley
West Firle
West Fleetham
West Garforth
West Ginge
West Glen
West Grafton
West Green
West Grimstead
West Grinstead
West Haddlesey
West Haddon
West Hagbourne
West Hagley
West Hall
West Hallam
West Halton
West Ham
West Hampstead
West Handley
West Hanney
West Hanningfield
West Hardwick
West Harptree
West Harrow
West Hatch
West Heath
West Helmsdale
West Hendon
West Hendred
West Heslerton
West Hill
West Hoathly
West Holme
West Horndon
West Horrington
West Horsley
West Hougham
West Huntspill
West Hyde
West Hythe
West Ilsley
West India Quay
West Itchenor
West Keal
West Kennett
West Kensington
West Kilbride
West Kilburn
West Kingsdown
West Kington
West Kirby
West Knapton
West Knighton
West Knoyle
West Kyloe
West Lambrook
West Langdon
West Langwell
West Lavington
West Layton
West Leake
West Lexham
West Lilling
West Lingo
West Linton
West Littleton
West Lockinge
West Looe
West Lulworth
West Lutton
West Lydford
West Lyng
West Lynn
West Malling
West Malvern
West Marden
West Markham
West Marsh
West Marton
West Melton
West Meon
West Mersea
West Milton
West Minster
West Molesey
West Monkton
West Moors
West Muir
West Ness
West Newton
West Norwood
West Ogwell
West Orchard
West Overton
West Park
West Parley
West Peckham
West Pennard
West Pentire
West Perry
West Porlock
West Putford
West Quantoxhead
West Rainton
West Rasen
West Raynham
West Rounton
West Row
West Rudham
West Runton
West Saltoun
West Sandwick
West Scrafton
West Shinness Lodge
West Somerton
West Stafford
West Stockwith
West Stoke
West Stonesdale
West Stoughton
West Stour
West Stourmouth
West Stow
West Stowell
West Stratton
West Street
West Tanfield
West Taphouse
West Tarbert
West Tarring
West Thorney
West Thurrock
West Tilbury
West Tisted
West Tofts
West Torrington
West Town
West Tytherley
West Walton
West Walton Highway
West Wellow
West Wemyss
West Wick
West Wickham
West Williamston
West Winch
West Winterslow
West Wittering
West Witton
West Woodburn
West Woodhay
West Woodlands
West Worldham
West Worlington
West Worthing
West Wratting
West Wycombe
West Yell
Westbere
Westborough
Westbourne
Westbourne Green
Westbourne Grove
Westbourne Park
Westbrook
Westbury
Westbury Leigh
Westbury on Trym
Westbury-on-Severn
Westbury-sub-Mendip
Westby
Westcliff-on-Sea
Westcombe
Westcote
Westcott
Westcott Barton
Westdean
Westdowns
Wester Aberchalder
Wester Badentyre
Wester Culbeuchly
Wester Dechmont
Wester Fintray
Wester Gruinards
Wester Lealty
Wester Lonvine
Wester Newburn
Wester Ord
Wester Quarff
Wester Skeld
Westerdale
Westerfield
Westergate
Westerham
Westerleigh
Western Avenue
Westerton
Westerwick
Westferry
Westfield
Westfield Moor
Westgate
Westgate Hill
Westgate on Sea
Westhall
Westham
Westhampnett
Westhay
Westhead
Westhide
Westhill
Westhope
Westhorpe
Westhoughton
Westhouse
Westhouses
Westhumble
Westing
Westlake
Westleigh
Westleton
Westley
Westley Heights
Westley Waterless
Westlington
Westlinton
Westloch
Westmarsh
Westmeston
Westmill
Westminster
Westminster Abbey
Westminster Bridge
Westmuir
Westness
Westnewton
Weston
Weston Beggard
Weston by Welland
Weston Colville
Weston Corbett
Weston Coyney
Weston Favell
Weston Green
Weston Heath
Weston Hills
Weston Jones
Weston Longville
Weston Lullingfields
Weston Patrick
Weston Point
Weston Rhyn
Weston Subedge
Weston Turville
Weston under Penyard
Weston under Wetherley
Weston Underwood
Weston-in-Gordano
Weston-on-the-Green
Weston-on-Trent
Weston-super-Mare
Weston-under-Lizard
Westonbirt
Westoning
Westonzoyland
Westow
Westport
Westrigg
Westruther
Westry
Westside
Westward
Westward Ho!
Westway
Westwell
Westwell Leacon
Westwick
Westwood
Westwood Heath
Westwoodside
Wetheral
Wetherby
Wetherden
Wetheringsett
Wethersfield
Wethersta
Wetherup Street
Wetley Rocks
Wettenhall
Wettenhall Green
Wetton
Wetwang
Wetwood
Wexcombe
Weybourne
Weybread
Weybridge
Weycroft
Weydale
Weyhill
Weymouth
Whaddon
Whaddon Gap
Whale
Whaley
Whaley Bridge
Whaligoe
Whalley
Whalton
Wham
Whaplode
Whaplode Drove
Whaplode St Catherine
Wharfe
Wharles
Wharncliffe Side
Wharram le Street
Wharram Percy
Wharton
Whashton
Whatcote
Whatfield
Whatley
Whatlington
Whatstandwell
Whatton
Whauphill
Whaw
Wheatacre
Wheatenhurst
Wheathampstead
Wheathill
Wheatley
Wheatley Hill
Wheatley Lane
Wheaton Aston
Wheddon Cross
Wheedlemont
Wheelerstreet
Wheelock
Wheelton
Wheen
Wheldrake
Whelford
Whelpley Hill
Whelpo
Whenby
Whepstead
Wherstead
Wherwell
Wheston
Whetley Cross
Whetsted
Whetstone
Whicham
Whichford
Whickham
Whiddon Down
Whifflet
Whigstreet
Whilton
Whimple
Whimpwell Green
Whin Lane End
Whinburgh
Whinnyfold
Whippingham
Whipsnade
Whipton
Whisby
Whissendine
Whissonsett
Whistley Green
Whiston
Whitbeck
Whitbourne
Whitburn
Whitby
Whitchurch
Whitchurch Canonicorum
Whitchurch Hill
Whitcombe
Whitcott Keysett
White City
White Colne
White Coppice
White Cross
White End
White Hart Lane
White Lackington
White Ladies Aston
White Moor
White Notley
White Pit
White Roding
White Waltham
Whiteacen
Whiteash Green
Whitebog
Whitebridge
Whitebrook
Whiteburn
Whitecairn
Whitecairns
Whitecastle
Whitechapel
Whitechurch
Whitecraig
Whitecroft
Whitecrook
Whitecross
Whiteface
Whitefield
Whiteford
Whitegate
Whitehall
Whitehaven
Whitehill
Whitehills
Whitehouse
Whitekirk
Whitelackington
Whitelaw
Whiteleen
Whitelees
Whiteley
Whiteley Bank
Whiteley Village
Whiteleys
Whitemans Green
Whitemire
Whiteparish
Whiterashes
Whiterow
Whiteshill
Whiteside
Whitesmith
Whitestaunton
Whitestone
Whitestripe
Whiteway
Whitewell
Whiteworks
Whitewreath
Whitfield
Whitford
Whitgift
Whitgreave
Whithorn
Whiting Bay
Whitkirk
Whitlam
Whitland
Whitletts
Whitley
Whitley Bay
Whitley Chapel
Whitley Lower
Whitley Row
Whitlock's End
Whitminster
Whitmore
Whitnage
Whitnash
Whitney
Whitrigg
Whitsbury
Whitsome
Whitson
Whitstable
Whitstone
Whittingham
Whittingslow
Whittington
Whittle-le-Woods
Whittlebury
Whittlesey
Whittlesford
Whitton
Whittonditch
Whittonstall
Whitway
Whitwell
Whitwell-on-the-Hill
Whitwick
Whitwood
Whitworth
Whixall
Whixley
Whorlton
Whygate
Whyle
Whyteleafe
Wibdon
Wibsey
Wibtoft
Wichenford
Wichling
Wick
Wick Hill
Wick St Lawrence
Wicken
Wicken Bonhunt
Wickenby
Wickerslack
Wickersley
Wickford
Wickham
Wickham Bishops
Wickham Heath
Wickham Market
Wickham Skeith
Wickham St Paul
Wickham Street
Wickhambreaux
Wickhambrook
Wickhamford
Wickhampton
Wicklewood
Wickmere
Wickwar
Widdington
Widdop
Widdrington
Wide Open
Widecombe in the Moor
Widegates
Widemouth Bay
Widewall
Widford
Widmerpool
Widnes
Widworthy
Wigan
Wiggaton
Wiggenhall St Germans
Wiggenhall St Mary Magdalen
Wiggenhall St Mary the Virgin
Wiggenhall St Peter
Wiggington
Wigginton
Wigglesworth
Wiggonby
Wiggonholt
Wighill
Wighton
Wigmore
Wigsley
Wigsthorpe
Wigston
Wigston Parva
Wigthorpe
Wigtoft
Wigton
Wigtown
Wilbarston
Wilberfoss
Wilburton
Wilby
Wilcot
Wilcott
Wilcrick
Wildboarclough
Wilden
Wildhern
Wildhill
Wildsworth
Wilford
Wilkesley
Wilkhaven
Wilkieston
Willand
Willaston
Willen
Willenhall
Willerby
Willersey
Willersley
Willesborough
Willesborough Lees
Willesden
Willesden Green
Willesden Junction
Willesley
Willett
Willey
Williamscot
Williamthorpe
Willian
Willimontswick
Willingale
Willingdon
Willingham
Willington
Willington Corner
Willisham
Willitoft
Williton
Willoughby
Willoughby Waterleys
Willoughby-on-the-Wolds
Willoughton
Willows Green
Willsworthy
Wilmcote
Wilmington
Wilmslow
Wilnecote
Wilpshire
Wilsden
Wilsford
Wilsill
Wilsley Green
Wilson
Wilstead
Wilsthorpe
Wilstone
Wilton
Wimbish
Wimbish Green
Wimblebury
Wimbledon
Wimbledon Common
Wimbledon Park
Wimblington
Wimborne Minster
Wimborne St Giles
Wimbotsham
Wimpstone
Wincanton
Wincham
Winchburgh
Winchcombe
Winchelsea
Winchelsea Beach
Winchester
Winchet Hill
Winchfield
Winchmore Hill
Wincle
Wincobank
Windermere
Winderton
Windhill
Windlesham
Windley
Windley Meadows
Windmill Hill
Windrush
Windsor
Windy Yet
Windy-gates
Wineham
Winestead
Winewall
Winfarthing
Winford
Winforton
Winfrith Newburgh
Wing
Wingate
Wingates
Wingerworth
Wingfield
Wingham
Wingmore
Wingrave
Winkburn
Winkfield
Winkfield Row
Winkhill
Winkleigh
Winksley
Winksley Banks
Winkton
Winlaton
Winlaton Mill
Winless
Winmarleigh
Winnards Perch
Winnersh
Winscombe
Winsford
Winsham
Winshill
Winskill
Winslade
Winsley
Winslow
Winson
Winsor
Winster
Winston
Winstone
Winswell
Winterborne Came
Winterborne Clenston
Winterborne Houghton
Winterborne Kingston
Winterborne Monkton
Winterborne Stickland
Winterborne Whitechurch
Winterborne Zelston
Winterbourne
Winterbourne Abbas
Winterbourne Bassett
Winterbourne Dauntsey
Winterbourne Earls
Winterbourne Gunner
Winterbourne Monkton
Winterbourne Steepleton
Winterbourne Stoke
Winterburn
Wintercleugh
Winteringham
Winterley
Wintersett
Wintershill
Winterslow
Winterton
Winterton-on-Sea
Winthorpe
Winton
Wintringham
Winwick
Wirksworth
Wirral
Wirswall
Wisbech
Wisbech St Mary
Wisborough Green
Wiseton
Wishaw
Wisley
Wispington
Wissett
Wissington
Wistanstow
Wistanswick
Wistaston
Wiston
Wistow
Wiswell
Witcham
Witchampton
Witchburn
Witchford
Witcombe
Witham
Witham Friary
Witham on the Hill
Withcote
Witherenden Hill
Witheridge
Witherley
Withern
Withernsea
Withernwick
Withersdale Street
Withersfield
Witherslack
Withiel
Withiel Florey
Withington
Withington Green
Withleigh
Withnell
Withybrook
Withycombe
Withycombe Raleigh
Withyham
Withypool
Witley
Witnesham
Witney
Wittering
Wittersham
Witton
Witton Bridge
Witton Gilbert
Witton Park
Witton-le-Wear
Wiveliscombe
Wivelsfield
Wivelsfield Green
Wivenhoe
Wiveton
Wix
Wixford
Wixoe
Woburn
Woburn Sands
Wokefield Park
Woking
Wokingham
Wolborough
Wold Newton
Woldingham
Wolf's Castle
Wolfelee
Wolferlow
Wolferton
Wolfhampcote
Wolfhill
Wolfpits
Wolfsdale
Woll
Wollaston
Wollerton
Wolsingham
Wolstenholme
Wolston
Wolvercote
Wolverhampton
Wolverley
Wolverton
Wolvesnewton
Wolvey
Wolviston
Wombleton
Wombourne
Wombwell
Womenswold
Womersley
Wonastow
Wonersh
Wonson
Wonston
Wooburn
Wooburn Green
Wood Burcote
Wood Dalling
Wood End
Wood Enderby
Wood Green
Wood Hayes
Wood Norton
Wood Street
Woodale
Woodbastwick
Woodbeck
Woodbine
Woodborough
Woodbridge
Woodbury
Woodbury Salterton
Woodchester
Woodchurch
Woodcote
Woodcroft
Woodcutts
Woodditton
Woodeaton
Woodend
Woodfalls
Woodford
Woodford Bridge
Woodford Green
Woodford Halse
Woodgate
Woodgreen
Woodhall
Woodhall Spa
Woodham
Woodham Ferrers
Woodham Mortimer
Woodham Walter
Woodhaven
Woodhead
Woodhill
Woodhorn
Woodhouse
Woodhouse Eaves
Woodhouses
Woodhurst
Woodingdean
Woodland
Woodlands
Woodlands Park
Woodleigh
Woodlesford
Woodley
Woodmancote
Woodmancott
Woodmansey
Woodmansterne
Woodminton
Woodmoor
Woodnesborough
Woodnewton
Woodplumpton
Woodrising
Woodseaves
Woodsend
Woodsetts
Woodsford
Woodside
Woodside Park
Woodstock
Woodstock Slop
Woodston
Woodthorpe
Woodton
Woodtown
Woodville
Woodwalton
Woodyates
Woofferton
Wookey
Wookey Hole
Wool
Woolacombe
Woolaston
Woolavington
Woolbeding
Wooler
Woolfardisworthy
Woolfords Cottages
Woolhampton
Woolhope
Woollage Green
Woolland
Woollard
Woollaton
Woolley
Woolmer Green
Woolmere Green
Woolmersdon
Woolpit
Woolscott
Woolstaston
Woolsthorpe
Woolston
Woolston Green
Woolstone
Woolton
Woolton Hill
Woolverstone
Woolverton
Woolwich
Woonton
Wooperton
Woore
Wootton
Wootton Bassett
Wootton Bridge
Wootton Common
Wootton Courtenay
Wootton Fitzpaine
Wootton Green
Wootton Rivers
Wootton St Lawrence
Wootton Wawen
Worcester
Worcester Park
Wordsley
Wordwell
Worfield
Workington
Worksop
Worlaby
World's End
Worlds End
Worle
Worleston
Worlingham
Worlington
Worlingworth
Wormbridge
Wormegay
Wormelow Tump
Wormhill
Wormiehills
Wormingford
Worminghall
Wormington
Worminster
Wormistone
Wormit
Wormleighton
Wormley
Wormshill
Wormsley
Worplesdon
Worrall
Worsbrough
Worsley
Worstead
Worsthorne
Worston
Worswell
Worth
Worth Matravers
Wortham
Worthen
Worthenbury
Worthing
Worthington
Wortley
Worton
Wortwell
Wotherton
Wotton
Wotton Underwood
Wotton-under-Edge
Woughton on the Green
Wouldham
Wrabness
Wrae
Wrafton
Wragby
Wragholme
Wramplingham
Wrangham
Wrangle
Wrangle Lowgate
Wrangway
Wrantage
Wrawby
Wraxall
Wray
Wraysbury
Wrea Green
Wreay
Wrecclesham
Wrekenton
Wrelton
Wrenbury
Wreningham
Wrentham
Wrenthorpe
Wrentnall
Wressle
Wrestlingworth
Wretham
Wretton
Wrexham
Wribbenhall
Wrightington Bar
Wrightpark
Wrinehill
Wrington
Writhlington
Writtle
Wrockwardine
Wroot
Wrotham
Wrotham Heath
Wrotham Hill
Wrotham Park
Wroughton
Wroxall
Wroxeter
Wroxhall
Wroxham
Wroxton
Wstrws
Wyaston
Wyberton
Wyboston
Wybunbury
Wych Cross
Wychbold
Wyck
Wyck Rissington
Wycliffe
Wycoller
Wycomb
Wycombe Marsh
Wyddial
Wye
Wyke
Wyke Regis
Wykeham
Wyken
Wykey
Wylam
Wylde Green
Wyllie
Wylye
Wymering
Wymeswold
Wymington
Wymondham
Wyndham
Wynford Eagle
Wynnstay
Wynyard
Wyre Piddle
Wysall
Wyson
Wythall
Wytham
Wythburn
Wyton
Wyverstone
Wyverstone Street
Wyville
Y Fan
Y Felinheli
Y Ffor
Yaddlethorpe
Yafford
Yafforth
Yalding
Yanworth
Yapham
Yapton
Yarburgh
Yarcombe
Yardley
Yardley Gobion
Yardley Hastings
Yardro
Yarkhill
Yarlet
Yarley
Yarlington
Yarm
Yarmouth
Yarnbrook
Yarnfield
Yarnscombe
Yarnton
Yarpole
Yarrow
Yarrow Feus
Yarrowford
Yarsop
Yarwell
Yate
Yateley
Yatesbury
Yattendon
Yatton
Yatton Keynell
Yaverland
Yaxham
Yaxley
Yazor
Yeading
Yeadon
Yealand Conyers
Yealand Redmayne
Yealmpton
Yearsley
Yeaton
Yeaveley
Yedingham
Yelford
Yelling
Yelvertoft
Yelverton
Yenston
Yeo Vale
Yeoford
Yeolmbridge
Yeomadon
Yeovil
Yeovil Marsh
Yeovilton
Yerbeston
Yesnaby
Yetlington
Yetminster
Yettington
Yetts o'Muckhart
Yielden
Yiewsley
Ynys
Ynysboeth
Ynysddu
Ynyshir
Ynyslas
Ynysmeudwy
Ynystawe
Ynysybwl
Yockenthwaite
Yockleton
Yokefleet
Yoker
Yonder Bognie
York
Yorkletts
Yorkley
Yorton
Youldon
Youldonmoor Cross
Youlgreave
Youlstone
Youlthorpe
Youlton
Young's End
Yoxall
Yoxford
Ysbyty Cynfyn
Ysbyty Ifan
Ysbyty Ystwyth
Ysceifiog
Ysgubor-y-coed
Ystalyfera
Ystrad
Ystrad Aeron
Ystrad Meurig
Ystrad Mynach
Ystradfellte
Ystradffin
Ystradgynlais
Ystradowen
Ythanwells
Ythsie
Zeal Monachorum
Zeals
Zelah
Zennor
Kings Lynn
Burton on Trent
