# Supplementary material for: ScholarLens: extracting competences from research publications for the automatic generation of semantic user profiles
Source: PeerJ journal article supplement (doi:10.7717/peerj-cs.121), 2017-07-03
Supplement: Pipeline.zip [file Pipeline.zip › Pipeline/gate/plugins/ANNIE/resources/gazetteer/city_uk_ambig.lst]

Charles:ambig=yes
Coast:ambig=yes
Rock:ambig=yes
Send:ambig=yes
Ford:ambig=yes
