# Supplementary material for: ScholarLens: extracting competences from research publications for the automatic generation of semantic user profiles
Source: PeerJ journal article supplement (doi:10.7717/peerj-cs.121), 2017-07-03
Supplement: Pipeline.zip [file Pipeline.zip › Pipeline/gate/plugins/ANNIE/resources/gazetteer/companies_uk_lower.lst]

8vo
above the title productions
accident advice helpline
acorn media uk
acrylicize
adastra minerals
addison lee
adfonic
agatha christie ltd.
agricultural & general engineers
ahrends, burton and koralek
ainsworths
alferon management
alfred mcalpine
allied carpets
angel trains
anglo arab alliance
anglo pacific group
antal international ltd
antenna international
the antique wine company
anyjunk
aon plc
appliansys
arcadia group
arcadis uk
arenapal
aricom
armajaro
art loss register
artech house
artists' collecting society
asc finance for business
ashmore group
ashtead group
astrazeneca
atelier one
atlantic books
atomic antelope
augere
autoquake
avenue 32
aviva
avocet mining
avolites
babcock international
backes & strauss
bad press
balderton capital
balfour beatty
balkan dream properties
base one group
bba aviation
bbc
bbc records
bedlam productions
bejam
belen echandia
bell pottinger private
george bell & sons
bentley & skinner
berendsen
berry brothers & rudd
berwin leighton paisner
bespoke henna
bestinvest
bestway
beta 2 limited
beyond retro
bioline reagents
biomed central
a & c black
bleep.com
blue inc
blue rubicon
blue whale systems
bluebay asset management
bmce bank international
bmj group
boden
bodyamr
boltfish recordings
boosey & hawkes
bp
the brand union
brent community transport
brewin dolphin
bridgeman art library
bridgepoint capital
brighttalk
briglin pottery
brit insurance
british airways
british airways limited
british american tobacco
british and commonwealth holdings
british energy
british home stores
british land
british youth council
brixton plc
brogan group
bromcom
brompton bicycle
bskyb
btg
bt group
btr plc
bulgarian dreams
bullguard
bunzl
bupa
cad & the dandy
cadbury
cake entertainment
caparo
cape plc
capita group
capita symonds
capital economics
carlisle managed solutions
carlton carriage co
carter jonas
cartoon network development studio europe
cassell
centaur media
cex
chamberlin, powell and bon
changegroup
charter international
chelsea foods
chesham amalgamations
cheyne capital management
chi records
the children's investment fund management
chloride group
choiceodds
churchill insurance company
cl�ment-talbot
cls holdings
cmg
coats plc
the cobra group
coin street community builders
college of public speaking
communicaid
compair
comres
conville and walsh
cosmos holidays
cox & king
cox & kings
creek audio
cronlab
current publishing (uk)
dac beachcroft
dade2
daejan holdings
dagenham motors
dahabshiil
daily mail and general trust
dalgety plc
darty plc
datacash
datamonitor
datawind
davenport lyons
davis langdon
de vere group
dealogic
derwent capital markets
dexion
diploma plc
direct ferries
diversified global graphics group
djhistory.com
dods (group) plc
dot2dot
double negative (vfx)
dunnhumby
e-clear
eastern electricity
ebiquity
eca international
ecoigo
ecourier
ede & ravenscroft
edf energy
electronic music studios
elementis
elix-irr
emap international limited
emerald energy
emi
emi music publishing
empresaria group
endemol uk
enders analysis
the energy group
english eccentrics
enodis
ensco plc
enso group
eon digital entertainment
erased tapes records
ergo id
ernst & young
eterniti motors
etf securities
etx capital
euroffice
eurotherm
euromonitor international
evolution group
evraz
exco international
expedition engineering
eyevine
family law in partnership
fever media
filmfair
filmon
first solution money transfer
first student uk
floris of london
forte group
frances lincoln publishers
frankham consultancy group
freeplay energy
freestone and webb
fresnillo plc
future shorts
galliford try
gapforce
gas light and coke company
gcm resources
gem diamonds
general eyewear
generation investment management
gestetner
gfk nop
gfms
antony gibbs & sons
glaxosmithkline
glaxo wellcome
globalcampus
gmw architects
theodore goddard
goldgenie
the goldsmiths' company assay office
good relations
graff diamonds
grahams hi-fi
greenwich leisure limited
greycon
grosvenor group
freddie grubb
gulland padfield
gunter's tea shop
hand in hand fire & life insurance society
hanne & co
hanson plc
hardy amies ltd
hardy oil and gas
hart, son, peard and co.
havas digital
hays plc
heathrow airport holdings
henderson group
henyep investment
heron international
hhcl
hi-gen power
higgs and hill
hinduja group
hirst research centre
hodge jones & allen
hogan lovells
holland, hannen & cubitts
holloway brothers (london)
hooper's telegraph works
horniman's tea
house of fraser
houlihan lokey
howden joinery
hsbc
humphrys, tennant and dykes
hungryhouse.co.uk
hunter plastics limited
hunting plc
huntsworth
hyperoptic
icap
icm research
ig group
imagini
imperial chemical industries
imperial continental gas association
imperial innovations
ince & co.
inchcape plc
inflexion private equity
information security forum
inmarsat
intermediate capital group
international computers limited
international tea co. stores
intertek
invensys
investis
iona capital
ip group
ipsos mori
isokon
ite group
iwoca
j & a beare
j. and g. rennie
jardine lloyd thompson
jean machine
jessica kingsley publishers
jestico + whiles
jkx oil & gas
john laing plc
john penn and sons
johnson banks
johnson matthey
judgenergy
julia burness
justgiving
j&w nicholson & co
kantar worldpanel
kaplan financial ltd
kaupthing singer & friedlander
keller group
kesslers international group
kind consumer limited
kingfisher plc
jessica kingsley publishers
kold sweat records
krum corporate
l.k.bennett
ladbrokes
laird plc
lamson engineering company ltd
lane clark & peacock
language connect
lasmo
latinnews
lattice group
law debenture
leading edge forum
lebrecht photo library
legal & general
levitt bernstein
lewis & co
lewis leathers
lewis recordings
lida
limmer holdings
linklaters
lledo
lloyds banking group
llm communications
lloyd johnson
logica
londonmetric property
london climate change agency
london stock exchange group
the london distillery company
london necropolis company
long tall sally clothing
lonmin
loose music
lucas brothers, builders
luther pendragon
man group
marex spectron
marjan television network
markit
marks & clerk
marks & spencer
mathmos
maxwell communications corporation
mcbride plc
mecom group
medical research council technology
melrose plc
andrew melrose
mepc plc
mercury asset management
metaswitch
methuen publishing
metropolis international
mfi group
mhp communications
microplas
millennium & copthorne hotels
millhouse capital
minerva
mintel
misys
mitre sports international
molton brown
mondi group
monex europe
moneycorp
monington and weston
morgan crucible
morgan sindall group
morrison facilities services
moss empires
mousebreaker
mjp architects
viacom international media networks
mushroom tv
mwb group holdings
mysociety
nails inc.
nannyshare.co.uk
nathaniel lichfield and partners
national benzole
national express group
national freight corporation
national grid plc
national westminster bank
nbnk
nelsons
nimax theatres
n m rothschild & sons
nobrow press
north west london credit union
norton rose fulbright
notion capital
ntt europe ltd
oak futures
ob10
ocean group plc
odyssey airlines
old london underground company
omnicompete
omnifone
onepoll
openbet
ophir energy
opinium research llp
optimax
orc international
organic monitor
organisation and technology research
orsu metals
ostc
outsights
ovum ltd.
pa consulting group
pace sports management
palace software
panmure gordon & co.
pantheon ventures
park royal partnership
pearn, pollinger & higham
pearson plc
peek freans
perenco
peruvian corporation
phaidon press
phillips & drew
pimlico plumbers
pinchin johnson & associates
playfish
plus500
henry poole & co
portland communications
position ignition
premier farnell
premier model management
premier oil
pressparty
progressive digital media
pricewaterhousecoopers
prudential plc
the pyrene company limited
qube software
quercus
r. a. rooney & sons
railtrack
ralph & co
rapha
rara.com
rare tea company
rathbone brothers
reaktion books
reed elsevier
reliance globalcom
rentokil initial
resolution plc
restaurant group
retro-juice productions
rexam
reynolds porter chamberlain
rigby & peller
rio tinto group
rjdj
robert fleming & co.
robert walters plc
roberson wine
rockstar london
rolls-royce group plc
rothmans international
roots&choice
royal dutch shell
royal exchange assurance corporation
royal london asset management
royal mail
rsa insurance group
rushes postproduction
ruspetro
russell & bromley
s. g. warburg & co.
sabmiller
safeway
sainsbury's
salamander energy
salviati
samuel enderby & sons
samvo group
santander uk
satellite information services
scarlet blade theatre
dr. scholl's
schroders
science photo library
science projects limited
sears plc
securicor
sedgwick group
select model management
sellar property group
senceive
sense worldwide
service in informatics and analysis
shaftesbury plc
sharps pixley
shazam (service)
shed media
shutl
siebe gorman
siebe plc
siemens brothers
signet jewelers
signwave
silence therapeutics
silverdoor
simmons & simmons
sinclair research
sir robert mcalpine
slaughter and may
smith & nephew
smiths gore
smiths group
sobranie
soco international
sony mobile communications
southern fried chicken
speedo international limited
spire healthcare
spotware
square enix europe
ssl international
stainer & bell
standard chartered
standard telephones and cables
stanton williams
statpro group
stemcor
sthree
storage made easy
storehouse plc
sun life & provincial holdings
survation
svg capital
swaine adeney brigg
swan song records
system simulation
syswear
takeover/cloud 9
talktalk group
tamar.com
tanner krolle
tata steel europe
tate & lyle
tate publishing ltd
taxi media
taylor nelson sofres
taylor wimpey
taylor woodrow
td tom davies
telecitygroup
telecom plus
telewest
testplant
thames & hudson
thames water authority
the bedford estate
thg sports
thomas cook & son
thomsons online benefits
thorn electrical industries
thorn emi
three six zero group
thurleigh investment managers
tomkins plc
tower hamlets summer university
towerbrook capital partners
tpp law limited
tradus
transmeridian air cargo
transmission recordings
transtales entertainment
travers smith
tribal group
trinity mirror
trowers & hamlins
trustee savings bank
tullett prebon
tullow oil
tv pixie
ubiquity press
ubm plc
ucb home loans
ucl business
ugly models
uk youth parliament
ukstreetsounds
uktv
ultramar plc
underbelly limited
unilever
union hand-roasted coffee
united biscuits
united kingdom accreditation service
unity capital
urturn
userfarm
vanco
varsity express
vedanta resources
venturethree
versailles group
very nearly almost
vesuvius plc
viagogo
videogamer.com
virgin emi records
virtual internet
vistascreen
ward & company of london
waring brothers
watney combe & reid
web technology group
webb ellis
white line hotels
whitehead mann
whyte chemicals
wildsmith shoes ltd.
william hill
williams lea
william watkins ltd
willis group
wogdon & barton
the woolwich
woolworths group
workspace group
wpp plc
wright & teague
wsp group
wynndel property management
xchanging
yazino
yogscast ltd
yossarianlives!
z/yen
zavvi entertainment group ltd
zeneca
