# Supplementary material for: ScholarLens: extracting competences from research publications for the automatic generation of semantic user profiles
Source: PeerJ journal article supplement (doi:10.7717/peerj-cs.121), 2017-07-03
Supplement: Pipeline.zip [file Pipeline.zip › Pipeline/gate/plugins/ANNIE/resources/gazetteer/company_ambig.lst]

Abbey:kind=ambig
Abbott:kind=ambig
Abacus:kind=ambig
Achilles:kind=ambig
Aeneas:kind=ambig
Amazon:kind=ambig
Analog Devices:kind=ambig
Apple:kind=ambig
Arctic Cat:kind=ambig
Arlington:kind=ambig
Ayer:kind=ambig
Banana Republic:kind=ambig
BAT:kind=ambig
Baxter:kind=ambig
Beefeater:kind=ambig
Blockbuster:kind=ambig
Bombardier:kind=ambig
Boone:kind=ambig
Boots:kind=ambig
Brunswick:kind=ambig
Burroughs:kind=ambig
Cameron:kind=ambig
Caterpillar:kind=ambig
Citizen:kind=ambig
Cliffs:kind=ambig
Concert:kind=ambig
Continental:kind=ambig
Cooper:kind=ambig
Courage:kind=ambig
Courier:kind=ambig
Cox:kind=ambig
Crimson:kind=ambig
Crown:kind=ambig
Customers:kind=ambig
Cypress:kind=ambig
Dana:kind=ambig
Dell:kind=ambig
Delta:kind=ambig
Deluxe:kind=ambig
Dexter:kind=ambig
Dome:kind=ambig
Dominion:kind=ambig
Dresser:kind=ambig
Duke:kind=ambig
Eagle:kind=ambig
Edison:kind=ambig
Elders:kind=ambig
Elisa:kind=ambig
Equitable:kind=ambig
Eureka:kind=ambig
Fox:kind=ambig
Gap:kind=ambig
Genie:kind=ambig
Genus:kind=ambig
Gm:kind=ambig
GM:kind=ambig
Grant:kind=ambig
Halifax:kind=ambig
Hampshire:kind=ambig
Hermes:kind=ambig
Hughes:kind=ambig
Hutchison:kind=ambig
Imperial:kind=ambig
Intel:kind=ambig
Intuit:kind=ambig
Jack in the Box:kind=ambig
Jaguar:kind=ambig
Kay:kind=ambig
Kelly:kind=ambig
Lear:kind=ambig
Lilly:kind=ambig
Loot:kind=ambig
Mainstream:kind=ambig
Mead:kind=ambig
Meredith:kind=ambig
Meridian:kind=ambig
Metaphor:kind=ambig
Metro:kind=ambig
Nationwide:kind=ambig
Northern Star:kind=ambig
Norton:kind=ambig
Orange:kind=ambig
Owens:kind=ambig
Paramount:kind=ambig
Pentagram:kind=ambig
Philips:kind=ambig
Phillips:kind=ambig
Premier:kind=ambig
Prodigy:kind=ambig
Quaker:kind=ambig
Quantum:kind=ambig
Quest:kind=ambig
Reed:kind=ambig
Regency:kind=ambig
Reynolds:kind=ambig
Rover:kind=ambig
Sage:kind=ambig
Sailor:kind=ambig
Seat:kind=ambig
Sharp:kind=ambig
Shell:kind=ambig
Sprint:kind=ambig
Subway:kind=ambig
Sunset:kind=ambig
Synergy:kind=ambig
Target:kind=ambig
Telecom:kind=ambig
Thomson:kind=ambig
Thorn:kind=ambig
Total:kind=ambig
Tribune:kind=ambig
Vale:kind=ambig
Virgin:kind=ambig
Ford:kind=ambig
