# Supplementary material for: ScholarLens: extracting competences from research publications for the automatic generation of semantic user profiles
Source: PeerJ journal article supplement (doi:10.7717/peerj-cs.121), 2017-07-03
Supplement: Pipeline.zip [file Pipeline.zip › Pipeline/gate/plugins/ANNIE/resources/gazetteer/country.lst]

Afghanistan
Albania
Alderney
Algeria
America
American Samoa
Andorra
Angola
Anguilla
Antigua and Barbuda
Antilles
Argentina
Aruba
Atoll de Johnston
Atoll de Palmyra
Australia
Austria
Azerbaidjan
Bahamas
Bahrain
Bangladesh
Barbados
Bassas
Bassas da India
Belarus
Belau
Belgium
Belize
Benin
Bermuda
Bhutan
Bolivia
Bora
Bosnia
Botswana
Brazil
Britain
British Indian Ocean Territory
Brunei
Bulgaria
Burkina
Burkina Faso
Burma
Burundi
Cambodia
Cameroon
Canada
CapVert
Cape Verde
Central African Republic
Chad
Chile
China
Colombia
Comores
Comoros
Congo
Costa Rica
Croatia
Cuba
Cyprus
Czechoslovakia
Denmark
Djibouti
Dominica
Dominican Republic
East Germany
Ecuador
Egypt
El Salvador
Emirates
Equatorial Guinea
Estonia
Ethiopia
Federal Republic of Germany
Federated States of Micronesia
Fiji
Finland
France
French Guiana
French Polynesia
French Southern and Antarctic Lands
Gabon
Gambia
Gaza Strip
German Democratic Republic
Germany
Ghana
Gibraltar
Great Britain
Greece
Greenland
Grenada
Groenland
Guadeloupe
Guam
Guatemala
Guernsey
Guinea
Guyana
Haiti
Haïti
Herm
Holland
Honduras
Hong Kong
Hongkong
Hungary
Iceland
India
Indonesia
Irak
Iran
Iraq
Ireland
Isle of Man
Israel
Italy
Ivory Coast
Jamaica
Jan Mayen
Japan
Jersey
Johnston Atoll
Jordan
Katar
Kazakhstan
Kenya
Kingman Reef
Kirghizistan
Kiribati
Korea
Kuwait
Laos
Latin America
Latvia
Lebanon
Lesotho
Lettonie
Liban
Liberia
Libya
Liechtenstein
Lithuania
Luxembourg
Macao
Macau
Madagascar
Malawi
Malaysia
Maldives
Mali
Malta
Maroc
Martinique
Mauritania
Mauritius
Mayotte
Mexico
Miquelon
Moldavia
Monaco
Mongolia
Montenegro
Montserrat
Morocco
Mozambique
Myanmar
NZ
Namibia
Namibie
Nauru
Nepal
Netherlands
Netherlands Antilles
Nevis
New Caledonia
New Zealand
Nicaragua
Niger
Nigeria
Niue
North Korea
Norway
Népal
Oman
Pakistan
Palau
Palestine
Palmyra Atoll
Panama
Papoua
Papouasie
Papua New Guinea
Paraguay
Peru
Philippines
Poland
Porto Rico
Portugal
Puerto Rico
Qatar
Reunion
Romania
Royaume
Ruanda
Russia
Rwanda
Saint Kittset
Saint Vincent
Saint-Pierreet
Sainte-Hlène
Sainte-Lucie
Samoa
San Marino
Sao Tome and Principe
Saudi Arabia
Senegal
Seychelles
Sierra Leone
Singapore
Somalia
South Africa
South Korea
Soviet Union
Spain
Sri Lanka
SriLanka
St.Barthélemy
Sudan
Surinam
Suriname
Svalbard
Swaziland
Sweden
Switzerland
Syria
Tadjikistan
Taiwan
Tanzania
Taïwan
Tchad
Thailand
The Netherlands
Tibet
Togo
Tokelau
Tonga
Trinidad and Tobago
Trust Territory of the Pacific
Tunisia
Turkey
Turkmenistan
Tuvalu
U K
U.K.
U S
U.S.
U S A
U.S.A.
U S S R
U.S.S.R.
UAE
UK
US
USA
USSR
Uganda
Ukraine
United Arab Emirates
United Kingdom
United States
United States of America
Uruguay
Vanuatu
Vatican
Vatican City
Venezuela
Vietnam
Wallis & Futuna
Wallis and Futuna
West Bank
West Germany
Western Sahara
Western Samoa
Yugoslavia
Yémen
Zaire
Zambia
Zaïre
Zimbabwe
the Netherlands
Île Clipperto
Île Europa
Île Howland
Île Jarvis
Île Juan de Nova
Île Navassa
Île Tromelin
Munckinland
Slovenia
Slovakia
Serbia
Czech Republic
Uzbekistan
Tajikistan
British Isles
N. Korea
S. Korea
Chechnya
Moldova
Azerbaijan
Trinidad
Tobago
Kazakstan
Russian Federaton
