# Supplementary material for: ScholarLens: extracting competences from research publications for the automatic generation of semantic user profiles
Source: PeerJ journal article supplement (doi:10.7717/peerj-cs.121), 2017-07-03
Supplement: Pipeline.zip [file Pipeline.zip › Pipeline/gate/plugins/ANNIE/resources/gazetteer/country_code.lst]

ad
ae
af
ag
ai
al
am
an
ao
aq
ar
as
at
au
aw
az
ba
bb
bd
be
bf
bg
bh
bi
bj
bm
bn
bo
br
bs
bt
bv
bw
by
bz
ca
cc
cf
cg
ch
ci
ck
cl
cm
cn
co
cr
cs
cu
cv
cx
cy
cz
de
dj
dk
dm
do
dz
ec
ee
eg
eh
es
et
fi
fj
fk
fm
fo
fr
fx
ga
gb
gd
ge
gh
gi
gl
gp
gq
gf
gm
gn
gr
gt
gu
gw
gy
hk
hm
hn
hr
ht
hu
id
ie
il
in
io
iq
ir
is
it
jm
jo
jp
ke
kg
kh
ki
km
kn
kp
kr
kw
ky
kz
la
lb
lc
li
lk
lr
ls
lt
lu
lv
ly
ma
mc
md
mg
mh
ml
mm
mn
mo
mp
mq
mr
ms
mt
mu
mv
mw
mx
my
mz
na
nc
ne
nf
ng
ni
nl
no
np
nr
nt
nu
nz
om
pa
pe
pf
pg
ph
pk
pl
pm
pn
pt
pr
pw
py
qa
re
ro
ru
rw
sa
sb
sc
sd
se
sg
sh
si
sj
sk
sl
sm
sn
so
sr
st
su
sv
sy
sz
tc
td
tf
tg
th
tj
tk
tm
tn
to
tp
tr
tt
tv
tw
tz
ua
ug
uk
um
us
uy
uz
va
vc
ve
vg
vi
vn
vu
wf
ws
ye
yu
za
zm
zr
zw
arpa
com
edu
gov
int
mil
nato
net
org
