# Supplementary material for: ScholarLens: extracting competences from research publications for the automatic generation of semantic user profiles
Source: PeerJ journal article supplement (doi:10.7717/peerj-cs.121), 2017-07-03
Supplement: Pipeline.zip [file Pipeline.zip › Pipeline/gate/plugins/ANNIE/resources/gazetteer/currency_unit.lst]

Asian Currency Unit
B Fr
BFr
CFA franc
CFP franc
Costa Rican colon
DM
Deutsch Mark
Deutsch Marks
Deutsche mark
Deutsche marks
E
ECU
East Caribbean dollar
Ecu
EURO:symbol=€
EUROS:symbol=€
Euro:symbol=€
Euros:symbol=€
F Fr
FFr
Fr
GBP:symbol=£
German mark
German marks
Macau Palaca
New Taiwan dollar
New Taiwan dollars
NT dollar
NT dollars
Ost Mark
S Fr
SFr
Saudi riyal
US dollar:symbol=$
US dollars:symbol=$
austral
baht
balboa
birr
bolivar
cedi
cent
cents
colon
cordoba
couronne
couronnes
cruzeiro
dalasi
deutsch mark
deutsch marks
deutschemark
deutschemarks
dinar
dinari
dirham
dollar:symbol=$
dollars:symbol=$
drach
drachma
drachmas
ecu
escudo
escudos
euc
euro:symbol=€
euros:symbol=€
floren
florens
forint
franc
francs
guarani
guilder
guilders
kina
koruna
krona
krone
kroner
kronor
kuna
kwacha
kwanza
kyat
lempira
leone
leu
lev
lilangeni
lira
liras
lire
livre
maloti
mark
markka
markkaa
marks
metical
naira
nuevo sol
ostmark
ouguiya
palaca
p
pence
pences
peseta
pesetas
peso
pesos
pound:symbol=£
pound sterling:symbol=£
pounds:symbol=£
pounds sterling:symbol=£
pula
punt
punts
quetzal
rand
rands
renminbi
rial
ringgit
riyal
ruble
rubles
rupee
rupees
rupiah
schilling
schillings
shekel
shekels
shilling
shillings
sol
sterling:symbol=£
sucre
taka
tugrik
vatu
yen
zaire
zloty
Austral
Baht
Balboa
Birr
Bolivar
Cedi
Cent
Cents
Colon
Cordoba
Couronne
Couronnes
Cruzeiro
Dalasi
Deutsch Mark
Deutsch Marks
Deutschemark
Deutschemarks
Dinar
Dinari
Dirham
Dollar:symbol=$
Dollars:symbol=$
Drach
Drachma
Drachmas
Ecu
Escudo
Escudos
Euc
Floren
Florens
Forint
Franc
Francs
Guarani
Guilder
Guilders
Kina
Koruna
Krona
Krone
Kroner
Kronor
Kuna
Kwacha
Kwanza
Kyat
Lempira
Leone
Leu
Lev
Lilangeni
Lira
Liras
Lire
Livre
Maloti
Mark
Markka
Markkaa
Marks
Metical
Naira
Nuevo Sol
Ostmark
Ouguiya
Palaca
Pence
Pences
Peseta
Pesetas
Peso
Pesos
Pound:symbol=£
Pound Sterling:symbol=£
Pounds:symbol=£
Pounds Sterling:symbol=£
Pula
Punt
Punts
Quetzal
Rand
Rands
Renminbi
Rial
Ringgit
Riyal
Ruble
Rubles
Rupee
Rupees
Rupiah
Schilling
Schillings
Shekel
Shekels
Shilling
Shillings
Sol
Sterling:symbol=£
Sucre
Taka
Tugrik
Vatu
Won
Yen
Zaire
Zloty
USD:symbol=$
