# Supplementary material for: ScholarLens: extracting competences from research publications for the automatic generation of semantic user profiles
Source: PeerJ journal article supplement (doi:10.7717/peerj-cs.121), 2017-07-03
Supplement: Pipeline.zip [file Pipeline.zip › Pipeline/gate/plugins/ANNIE/resources/gazetteer/date_post.lst]

yrs

yr

years

year

wks

wk

weeks

weekends

weekend

week

solstice

season

months

month

mnths

mnth

milleniums

millenium

millenia

half-milleniums

half-millenium

half-millenia

half-decades

half-decade

half-century

half-centuries

half milleniums

half millenium

half millenia

half decades

half decade

half century

half centuries

half - milleniums

half - millenium

half - millenia

half - decades

half - decade

half - century

half - centuries

festival

feast

eve

equinox

decades

decade

day

century

centuries

birthday

Solstice

Nameday

Name Day

Festival

Feast

Eve

Equinox

Day

Birthday
