# Supplementary material for: ScholarLens: extracting competences from research publications for the automatic generation of semantic user profiles
Source: PeerJ journal article supplement (doi:10.7717/peerj-cs.121), 2017-07-03
Supplement: Pipeline.zip [file Pipeline.zip › Pipeline/gate/plugins/ANNIE/resources/gazetteer/day.lst]

Wednesday
Wed.
Wed
Tuesday
Tues.
Tues
Tue.
Tue
Thursday
Thurs.
Thurs
Thur.
Thur
Thu.
Thu
Sunday
Sun.
Sun
Saturday
Sat.
Sat
Monday
Mon.
Mon
Friday
Fri.
Fri
