# Supplementary material for: ScholarLens: extracting competences from research publications for the automatic generation of semantic user profiles
Source: PeerJ journal article supplement (doi:10.7717/peerj-cs.121), 2017-07-03
Supplement: Pipeline.zip [file Pipeline.zip › Pipeline/gate/plugins/ANNIE/resources/gazetteer/department.lst]

Treasury Department
Treasury
Transportation Department
TREASURY
State Department
Labor Department
Justice Department
Interior Department
Highway Department
Department of the Interior
Department of Treasury
Department of Transportation
Department of Trade and Industry
Department of Labor
Department of Justice
Department of Interior
Department of Housing and Community Development
Department of Health and Human Services
Department of Commerce
Department of Agriculture
Commerce Department
Agriculture Department
