# Supplementary material for: ScholarLens: extracting competences from research publications for the automatic generation of semantic user profiles
Source: PeerJ journal article supplement (doi:10.7717/peerj-cs.121), 2017-07-03
Supplement: Pipeline.zip [file Pipeline.zip › Pipeline/gate/plugins/ANNIE/resources/gazetteer/facility.lst]

Angkor Wat
Broadway
Watergate
White House
Notre Dame
Kremlin
Pentagon
Auschwitz
Radwaniyah
McDonalds
McDonald's
New York Stock Exchange
Mir
Storgata
Madison Square Garden
Salman Pak
Maple Leaf Gardens
Saint-Germain-des-Pres Church
Highgrove
The Osborn
East 21st Street
30th Precinct
Cafe Centro
Tropica
Assembly Drive
British Museum
Cleveland Row
