# Supplementary material for: ScholarLens: extracting competences from research publications for the automatic generation of semantic user profiles
Source: PeerJ journal article supplement (doi:10.7717/peerj-cs.121), 2017-07-03
Supplement: Pipeline.zip [file Pipeline.zip › Pipeline/gate/plugins/ANNIE/resources/gazetteer/festival.lst]

karttika
Yuletide
Yom Kippur
Xmas Eve
Xmas 
Whitsun
Whit Sunday
Vaisakha
VJ
VE Day
V.J.
V.E. Day
Trinity Sunday
Thanksgiving
Tabernacles
Succoth
St Valentine's Day
St Swithun's Day
St Stephen's Day
St Patrick's Day
St Nicholas's Day
St Nicholas' Day
St George's Day
St David's Day
St Basil's Day
St Andrew's Day
St. Swithun's Day
St. Stephen's Day
St. Patrick's Day
St. Nicholas's Day
St. Nicholas' Day
St. George's Day
St. David's Day
St. Basil's Day
St. Andrew's Day
Spring festival
Spring Festival
Silver Jubilee
Shrove Tuesday
Shici-go-san
Shawwal
Septuagesima Sunday
Saraswati Puja
Saint Valentine's Day
Saint Swithun's Day
Saint Stephen's Day
Saint Patrick's Day
Saint Nicholas's Day
Saint Nicholas' Day
Saint George's Day
Saint David's Day
Saint Basil's Day
Saint Andrew's Day
Saga dawa
Saga Dawa
Rosh Hashanah
Rogation Sunday
Remembrance Sunday
Remembrance Day
Ramadan
Ramadam
Rabi I
Quinquagesima Sunday
Quadragesima Sunday
Phalguna
Phagan
Pesach
Pentecost
Passover
Palm Sunday
Pajjusana
Oli
Noruz
New Year's Eve
New Year
Muharram
Mothering Sunday
Mother's Day
Mehragan
May
Magha
Magar
Low Sunday
Lent
Katik
Jubilee
Jewish New Year
Islamic New Year
Independence Day
Holy Week
Hogmanay
Hanukkah
Hana Matsuri
Halloween
Hallowe'en
Guy Fawkes' night
Guy Fawkes' Night
Grandparent's
Good Friday
Good Fri
Golden Jubilee
Festival of Wesak
Festival Of Wesak
Feast of Weeks
Feast of Stephen
Feast of Pesach
Feast of Passover
Feast Of Weeks
Feast Of Stephen
Feast Of Pesach
Feast Of Passover
Fathering Sunday
Fathers' Day
Father's Day
Epiphany
Eastertide
Easter Sunday
Easter Monday
Easter
Diwali
Dhu-i-Hijja
Day of Atonement
Day Of Atonement
D-day
D-Day
Corpus Christi
Coronation
Commonwealth Day
Christmastide
Christmas Eve
Christmas
Chinese New Year
Chaitra
Burns night
Burns Night
Boxing Day 
Bonfire night
Bonfire Night
Bhadrapada
Bastille
Asvina
Asun
Assumption Sunday
Assumption 
Assumption
Ashadha
Ash Wednesday
Ascension Sunday
April Fool's
All Souls'
All Saints' 
All Hallows Eve
All Hallows
Advent Sunday
Advent 
