# Supplementary material for: ScholarLens: extracting competences from research publications for the automatic generation of semantic user profiles
Source: PeerJ journal article supplement (doi:10.7717/peerj-cs.121), 2017-07-03
Supplement: Pipeline.zip [file Pipeline.zip › Pipeline/gate/plugins/ANNIE/resources/gazetteer/govern_key.lst]

legislature
embassy
corps
consulate
circuit
academy
Project
Operations
National
Legislature
Fleet
Federal
Embassy
Chamber
Court of Appeals
Court
Corps
Consulate
Command
Circuit Court
Circuit
Academy
