# Supplementary material for: ScholarLens: extracting competences from research publications for the automatic generation of semantic user profiles
Source: PeerJ journal article supplement (doi:10.7717/peerj-cs.121), 2017-07-03
Supplement: Pipeline.zip [file Pipeline.zip › Pipeline/gate/plugins/ANNIE/resources/gazetteer/government/cabinet-ministers.lst]

David Cameron
Nick Clegg
William Hague
George Osborne
Kenneth Clarke
Theresa May
Liam Fox
Vincent Cable
Iain Duncan Smith
Chris Hulme
Andrew Lansley
Michael Gove
Eric Pickles
Philip Hammond
Caroline Spelman
Andrew Mitchell
Jeremy Hunt
Owen Paterson
Michael Moore
Cheryl Gillan
Danny Alexander
Baroness Warsi
Lord Strathclyde
