# Supplementary material for: ScholarLens: extracting competences from research publications for the automatic generation of semantic user profiles
Source: PeerJ journal article supplement (doi:10.7717/peerj-cs.121), 2017-07-03
Supplement: Pipeline.zip [file Pipeline.zip › Pipeline/gate/plugins/ANNIE/resources/gazetteer/government/constituencies-england.lst]

Aldershot
Aldridge-Brownhills
Altrincham and Sale West
Amber Valley
Arundel and South Downs
Ashfield
Ashford
Ashton-under-Lyne
Aylesbury
Banbury
Barking
Barnsley Central
Barnsley East
Barrow and Furness
Basildon and Billericay
Basingstoke
Bassetlaw
Bath
Batley and Spen
Battersea
Beaconsfield
Beckenham
Bedford
Bermondsey and Old Southwark
Berwick-upon-Tweed
Bethnal Green and Bow
Beverley and Holderness
Bexhill and Battle
Bexleyheath and Crayford
Birkenhead
Birmingham, Edgbaston
Birmingham, Erdington
Birmingham, Hall Green
Birmingham, Hodge Hill
Birmingham, Ladywood
Birmingham, Northfield
Birmingham, Perry Barr
Birmingham, Selly Oak
Birmingham, Yardley
Bishop Auckland
Blackburn
Blackpool North and Cleveleys
Blackpool South
Blackley and Broughton
Blaydon
Blyth Valley
Bognor Regis and Littlehampton
Bolsover
Bolton North East
Bolton South East
Bolton West
Bootle
Boston and Skegness
Bosworth
Bournemouth East
Bournemouth West
Bradford East
Bradford South
Bradford West
Bracknell
Braintree
Brent Central
Brent North
Brentford and Isleworth
Brentwood and Ongar
Bridgwater and West Somerset
Brigg and Goole
Brighton, Kemptown
Brighton, Pavilion
Bristol East
Bristol North West
Bristol South
Bristol West
Broadland
Bromley and Chislehurst
Bromsgrove
Broxbourne
Broxtowe
Buckingham
Burnley
Burton
Bury North
Bury South
Bury St Edmunds
Calder Valley
Camberwell and Peckham
Camborne and Redruth
Cambridge
Cannock Chase
Canterbury
Carlisle
Carshalton and Wallington
Castle Point
Central Devon
Central Suffolk and North Ipswich
Charnwood
Chatham and Aylesford
Cheadle
Chelmsford
Chelsea and Fulham
Cheltenham
Chesham and Amersham
City of Chester
City of Durham
Chesterfield
Chichester
Chingford and Woodford Green
Chippenham
Chipping Barnet
Chorley
Christchurch
Cities of London and Westminster
Clacton
Cleethorpes
Colchester
Colne Valley
Congleton
Copeland
Corby
Coventry North East
Coventry North West
Coventry South
Crawley
Crewe and Nantwich
Croydon Central
Croydon North
Croydon South
Dagenham and Rainham
Darlington
Dartford
Daventry
Denton and Reddish
Derby North
Derby South
Derbyshire Dales
Devizes
Dewsbury
Don Valley
Doncaster Central
Doncaster North
Dover
Dudley North
Dudley South
Dulwich and West Norwood
Ealing Central and Acton
Ealing North
Ealing, Southall
Easington
East Devon
East Ham
East Hampshire
East Surrey
East Worthing and Shoreham
East Yorkshire
Eastbourne
Eastleigh
Eddisbury
Edmonton
Ellesmere Port and Neston
Elmet and Rothwell
Eltham
Enfield North
Enfield, Southgate
Epping Forest
Epsom and Ewell
Erewash
Erith and Thamesmead
Esher and Walton
Exeter
Fareham
Faversham and Mid Kent
Feltham and Heston
Filton and Bradley Stoke
Finchley and Golders Green
Folkestone and Hythe
Forest of Dean
Fylde
Gainsborough
Garston and Halewood
Gateshead
Gedling
Gillingham and Rainham
Gloucester
Gosport
Grantham and Stamford
Gravesham
Great Grimsby
Great Yarmouth
Greenwich and Woolwich
Guildford
Hackney North and Stoke Newington
Hackney South and Shoreditch
Halesowen and Rowley Regis
Halifax
Haltemprice and Howden
Halton
Hammersmith
Hampstead and Kilburn
Harborough
Harlow
Harrogate and Knaresborough
Harrow East
Harrow West
Hartlepool
Harwich and North Essex
Hastings and Rye
Havant
Hayes and Harlington
Hazel Grove
Hemel Hempstead
Hemsworth
Hendon
Henley
Hereford and South Herefordshire
Hertford and Stortford
Hertsmere
Hexham
Heywood and Middleton
High Peak
Hitchin and Harpenden
Holborn and St Pancras
Hornchurch and Upminster
Hornsey and Wood Green
Horsham
Houghton and Sunderland South
Hove
Huddersfield
Huntingdon
Hyndburn
Ilford North
Ilford South
Ipswich
Isle of Wight
Islington North
Islington South and Finsbury
Jarrow
Keighley
Kenilworth and Southam
Kensington
Kettering
Kingston and Surbiton
Kingston upon Hull East
Kingston upon Hull North
Kingston upon Hull West and Hessle
Kingswood
Knowsley
Lancaster and Fleetwood
Leeds Central
Leeds East
Leeds North East
Leeds North West
Leeds West
Leicester East
Leicester South
Leicester West
Leigh
Lewes
Lewisham, Deptford
Lewisham East
Lewisham West and Penge
Leyton and Wanstead
Lichfield
Lincoln
Liverpool, Riverside
Liverpool, Walton
Liverpool, Wavertree
Liverpool, West Derby
Loughborough
Louth and Horncastle
Ludlow
Luton North
Luton South
Macclesfield
Maidenhead
Maidstone and The Weald
Maldon
Makerfield
Manchester Central
Manchester, Gorton
Manchester, Withington
Mansfield
Meon Valley
Meriden
Mid Bedfordshire
Mid Derbyshire
Mid Dorset and North Poole
Mid Norfolk
Mid Sussex
Mid Worcestershire
Middlesbrough
Middlesbrough South and East Cleveland
Milton Keynes North
Milton Keynes South
Mitcham and Morden
Mole Valley
Morecambe and Lunesdale
Morley and Outwood
New Forest East
New Forest West
Newark
Newbury
Newcastle-under-Lyme
Newcastle upon Tyne Central
Newcastle upon Tyne East
Newcastle upon Tyne North
Newton Abbot
Normanton, Pontefract and Castleford
North Cornwall
North Devon
North Dorset
North Durham
North East Bedfordshire
North East Cambridgeshire
North East Derbyshire
North East Hampshire
North East Hertfordshire
North East Somerset
North Herefordshire
North Norfolk
North Shropshire
North Somerset
North Swindon
North Thanet
North Tyneside
North Warwickshire
North West Cambridgeshire
North West Durham
North West Hampshire
North West Leicestershire
North West Norfolk
North Wiltshire
Northampton North
Northampton South
Norwich North
Norwich South
Nottingham East
Nottingham North
Nottingham South
Nuneaton
Old Bexley and Sidcup
Oldham East and Saddleworth
Oldham West and Royton
Orpington
Oxford East
Oxford West and Abingdon
Pendle
Penistone and Stocksbridge
Penrith and The Border
Peterborough
Plymouth, Moor View
Plymouth, Sutton and Devonport
Poole
Poplar and Limehouse
Portsmouth North
Portsmouth South
Preston
Pudsey
Putney
Rayleigh and Wickford
Reading East
Reading West
Redcar
Redditch
Reigate
Ribble Valley
Richmond (Yorks)
Richmond Park
Rochdale
Rochester and Strood
Rochford and Southend East
Romford
Romsey and Southampton North
Rossendale and Darwen
Rother Valley
Rotherham
Rugby
Ruislip, Northwood and Pinner
Runnymede and Weybridge
Rushcliffe
Rutland and Melton
Saffron Walden
Salisbury
Salford and Eccles
Scarborough and Whitby
Scunthorpe
Sedgefield
Sefton Central
Selby and Ainsty
Sevenoaks
Sheffield, Brightside and Hillsborough
Sheffield Central
Sheffield, Hallam
Sheffield, Heeley
Sheffield South East
Sherwood
Shipley
Shrewsbury and Atcham
Sittingbourne and Sheppey
Skipton and Ripon
Sleaford and North Hykeham
Slough
Solihull
Somerton and Frome
South Basildon and East Thurrock
South Cambridgeshire
South Derbyshire
South Dorset
South East Cambridgeshire
South East Cornwall
South Holland and The Deepings
South Leicestershire
South Norfolk
South Northamptonshire
South Ribble
South Shields
South Staffordshire
South Suffolk
South Swindon
South Thanet
South West Bedfordshire
South West Devon
South West Hertfordshire
South West Norfolk
South West Surrey
South West Wiltshire
Southampton, Itchen
Southampton, Test
Southend West
Southport
Spelthorne
St Albans
St Austell and Newquay
St Helens North
St Helens South and Whiston
St Ives
Stafford
Staffordshire Moorlands
Stalybridge and Hyde
Stevenage
Stockport
Stockton North
Stockton South
Stoke-on-Trent Central
Stoke-on-Trent North
Stoke-on-Trent South
Stone
Stourbridge
Stratford-on-Avon
Streatham
Stretford and Urmston
Stroud
Suffolk Coastal
Sunderland Central
Surrey Heath
Sutton and Cheam
Sutton Coldfield
Tamworth
Tatton
Taunton Deane
Telford
Tewkesbury
The Cotswolds
The Wrekin
Thirsk and Malton
Thornbury and Yate
Thurrock
Tiverton and Honiton
Tonbridge and Malling
Tooting
Torbay
Torridge and West Devon
Totnes
Tottenham
Truro and Falmouth
Tunbridge Wells
Twickenham
Tynemouth
Uxbridge and South Ruislip
Vauxhall
Wakefield
Wallasey
Walsall North
Walsall South
Walthamstow
Wansbeck
Wantage
Warley
Warrington North
Warrington South
Warwick and Leamington
Washington and Sunderland West
Watford
Waveney
Wealden
Weaver Vale
Wellingborough
Wells
Welwyn Hatfield
Wentworth and Dearne
West Bromwich East
West Bromwich West
West Dorset
West Ham
West Lancashire
West Suffolk
West Worcestershire
Westminster North
Westmorland and Lonsdale
Weston-Super-Mare
Wigan
Wimbledon
Winchester
Windsor
Wirral South
Wirral West
Witham
Witney
Woking
Wokingham
Wolverhampton North East
Wolverhampton South East
Wolverhampton South West
Worcester
Workington
Worthing West
Worsley and Eccles South
Wycombe
Wyre and Preston North
Wyre Forest
Wythenshawe and Sale East
Yeovil
York Central
York Outer
