# Supplementary material for: ScholarLens: extracting competences from research publications for the automatic generation of semantic user profiles
Source: PeerJ journal article supplement (doi:10.7717/peerj-cs.121), 2017-07-03
Supplement: Pipeline.zip [file Pipeline.zip › Pipeline/gate/plugins/ANNIE/resources/gazetteer/government/constituencies-n.ireland.lst]

Belfast East
Belfast North
Belfast South
Belfast West
East Antrim
East Londonderry
Fermanagh and South Tyrone
Foyle
Lagan Valley
Mid Ulster
Newry and Armagh
North Antrim
North Down
South Antrim
South Down
Strangford
Upper Bann
West Tyrone
