# Supplementary material for: ScholarLens: extracting competences from research publications for the automatic generation of semantic user profiles
Source: PeerJ journal article supplement (doi:10.7717/peerj-cs.121), 2017-07-03
Supplement: Pipeline.zip [file Pipeline.zip › Pipeline/gate/plugins/ANNIE/resources/gazetteer/government/constituencies-scotland.lst]

Aberdeen North
Aberdeen South
Airdrie and Shotts
Angus
Argyll and Bute
Ayr, Carrick and Cumnock
Banff and Buchan
Berwickshire, Roxburgh and Selkirk
Caithness, Sutherland and Easter Ross
Central Ayrshire
Coatbridge, Chryston and Bellshill
Cumbernauld, Kilsyth and Kirkintilloch East
Dumfries and Galloway
Dumfriesshire, Clydesdale and Tweeddale
Dundee East
Dundee West
Dunfermline and West Fife
East Dunbartonshire
East Kilbride, Strathaven and Lesmahagow
East Lothian
East Renfrewshire
Edinburgh East
Edinburgh North and Leith
Edinburgh South
Edinburgh South West
Edinburgh West
Falkirk
Glasgow Central
Glasgow East
Glasgow North
Glasgow North East
Glasgow North West
Glasgow South
Glasgow South West
Glenrothes
Gordon
Inverclyde
Inverness, Nairn, Badenoch and Strathspey
Kilmarnock and Loudoun
Kirkcaldy and Cowdenbeath
Lanark and Hamilton East
Linlithgow and East Falkirk
Livingston
Midlothian
Moray
Motherwell and Wishaw
Na h-Eileanan an Iar
North Ayrshire and Arran
North East Fife
Ochil and South Perthshire
Orkney and Shetland
Paisley and Renfrewshire North
Paisley and Renfrewshire South
Perth and North Perthshire
Ross, Skye and Lochaber
Rutherglen and Hamilton West
Stirling
West Aberdeenshire and Kincardine
West Dunbartonshire
