# Supplementary material for: ScholarLens: extracting competences from research publications for the automatic generation of semantic user profiles
Source: PeerJ journal article supplement (doi:10.7717/peerj-cs.121), 2017-07-03
Supplement: Pipeline.zip [file Pipeline.zip › Pipeline/gate/plugins/ANNIE/resources/gazetteer/government/constituencies-wales.lst]

Aberavon
Aberconwy
Alyn and Deeside
Arfon
Blaenau Gwent
Brecon and Radnorshire
Bridgend
Caerphilly
Cardiff Central
Cardiff North
Cardiff South and Penarth
Cardiff West
Carmarthen East and Dinefwr
Carmarthen West and South Pembrokeshire
Ceredigion
Clwyd South
Clwyd West
Cynon Valley
Delyn
Dwyfor Meirionnydd
Gower
Islwyn
Llanelli
Merthyr Tydfil and Rhymney
Monmouth
Montgomeryshire
Neath
Newport East
Newport West
Ogmore
Pontypridd
Preseli Pembrokeshire
Rhondda
Swansea East
Swansea West
Torfaen
Vale of Clwyd
Vale of Glamorgan
Wrexham
Ynys M�n
