# Supplementary material for: ScholarLens: extracting competences from research publications for the automatic generation of semantic user profiles
Source: PeerJ journal article supplement (doi:10.7717/peerj-cs.121), 2017-07-03
Supplement: Pipeline.zip [file Pipeline.zip › Pipeline/gate/plugins/ANNIE/resources/gazetteer/government/executive-agencies-abbreviations.lst]

CEFAS
CRB
DSDA
DSG
DVLA
FERA
HMCS
IPS
MHRA
TNA
NOMS
SPVA
