# Supplementary material for: ScholarLens: extracting competences from research publications for the automatic generation of semantic user profiles
Source: PeerJ journal article supplement (doi:10.7717/peerj-cs.121), 2017-07-03
Supplement: Pipeline.zip [file Pipeline.zip › Pipeline/gate/plugins/ANNIE/resources/gazetteer/government/executive-agencies-old.lst]

Animal Health
Asset Protection Agency
British National Space Agency
Buying Solutions
Central Office Of Information
Centre For Environment, Fisheries And Aquaculture Science|abbrev=CEFAS
Companies House
Criminal Records Bureau|abbrev=CRB
Defence Science And Technology Laboratory
Defence Storage And Distribution Agency|abbrev=DSDA
Defence Support Group|abbrev=DSG
Defence Vetting Agency
Driver And Vehicle Licensing Agency|abbrev=DVLA
Driving Standards Agency
FCO Services
The Food And Environment Research Agency|abbrev=FERA
Fire Service College
Forest Enterprise England
Forest Research
Government Car And Despatch Agency
Highways Agency
HM Courts Service|abbrev=HMCS
HM Land Registry
Identity And Passport Service|abbrev=IPS
Insolvency Service
Jobcentre Plus
Maritime And Coastguard Agency
Medicines And Healthcare Products And Regulatory Agency|abbrev=MHRA
Met Office
Ministry Of Defence Police And Guarding Agency
The National Archives|abbrev=TNA
National Fraud Authority
National Offender Management Service|abbrev=NOMS
National Measurement Office
Office Of The Public Guardian
Ordnance Survey
Pension, Disability And Carers Service
People, Pay And Pensions Agency
Planning Inspectorate
Queen Elizabeth Ii Conference Centre
The Royal Parks
Rural Payments Agency
Service Children's Education
Service Personnel And Veterans Agency|abbrev=SPVA
Skills Funding Agency
Treasury Solicitor's Department
Tribunals Service
UK Border Agency
UK Debt Management Office
UK Hydrographic Office
UK Intellectual Property Office
Valuation Office
Vehicle And Operator Services Agency
Vehicle Certification Agency
Veterinary Laboratories Agency
Veterinary Medicines Directorate
Wilton Park
