# Supplementary material for: ScholarLens: extracting competences from research publications for the automatic generation of semantic user profiles
Source: PeerJ journal article supplement (doi:10.7717/peerj-cs.121), 2017-07-03
Supplement: Pipeline.zip [file Pipeline.zip › Pipeline/gate/plugins/ANNIE/resources/gazetteer/government/executive-agencies.lst]

Animal Health Agency
Buying Solutions
Central Office of Information
Centre for Environment, Fisheries and Aquaculture Science
Child Support Agency
Companies House
Compensation Agency
Criminal Records Bureau
Defence Science and Technology Laboratory
Defence Storage and Distribution Agency
Defence Support Group
Defence Vetting Agency
Driver and Vehicle Licensing Agency
Driving Standards Agency
Export Credits Guarantee Department
FCO Services
Food and Environment Research Agency
Forensic Science Agency Northern Ireland
Forest Enterprise (England)
Forest Enterprise (Scotland)
Forest Research
Government Car and Despatch Agency
Her Majesty's Prison Service
Highways Agency
HM Courts Service
HM Land Registry
Identity and Passport Service
Insolvency Service
JobCentre Plus
Marine and Fisheries Agency
Maritime and Coastguard Agency
Meat Hygiene Service
Medicines and Healthcare products Regulatory Agency
Met Office
Ministry of Defence Police and Guarding Agency
National Fraud Authority
National Measurement Office
National Offender Management Service
National Policing Improvement Agency
National Savings and Investments
NHS Purchasing and Supply Agency
Northern Ireland Prison Service
Office for National Statistics
Office of the Public Guardian
Ordnance Survey
People, Pay and Pensions Agency
Planning Inspectorate
Queen Elizabeth II Conference Centre
Royal Mint
Royal Parks Agency
Rural Payments Agency
Service Children's Education
Service Personnel and Veterans Agency
Skills Funding Agency
The Fire Service College
The National Archives
The Pension, Disability and Carers Service incorporating The Pension Service and the Disability and Carers Service
Treasury Solicitor's Department
Tribunals Service
UK Border Agency
UK Debt Management Office
UK Hydrographic Office
UK Intellectual Property Office
Valuation Office Agency
Vehicle and Operator Services Agency
Vehicle Certification Agency
Veterinary Laboratories Agency
Veterinary Medicines Directorate
Wilton Park
Youth Justice Agency
