# Supplementary material for: ScholarLens: extracting competences from research publications for the automatic generation of semantic user profiles
Source: PeerJ journal article supplement (doi:10.7717/peerj-cs.121), 2017-07-03
Supplement: Pipeline.zip [file Pipeline.zip › Pipeline/gate/plugins/ANNIE/resources/gazetteer/government/govt-departments-ministerial-abbreviations.lst]

AGO
BERR
BIS
CLG
DCMS
DfE
DfEE
DECC
DEFRA
Defra
DFID
DfT
DIUS
DWP
DH
DHSS
DNH
DSS
DTI
ECGD
FCO
GEO
HMT
HO
LO
LHOL
LHLPC
MAFF
MoD
MoJ
MOT
NIO
PMO
ODPM
OLHC
OLHL
SO
WO
