# Supplementary material for: ScholarLens: extracting competences from research publications for the automatic generation of semantic user profiles
Source: PeerJ journal article supplement (doi:10.7717/peerj-cs.121), 2017-07-03
Supplement: Pipeline.zip [file Pipeline.zip › Pipeline/gate/plugins/ANNIE/resources/gazetteer/government/govt-departments-ministerial.lst]

Advocate General for Scotland
Attorney General's Office
Cabinet Office
Department for Business, Enterprise and Regulatory Reform
Department for Business, Innovation and Skills
Department for Children, Schools and Family
Department for Communities and Local Government
Department for Constitutional Affairs
Department for Culture, Media and Sport
Department for Education
Department for Education and Employment
Department for Education and Skills
Department for Energy and Climate Change
Department for Environment, Food and Rural Affairs
Department for Innovation, Universities and Skills
Department for International Development
Department for The Environment, Transport and The Regions
Department for Transport
Department for Work and Pensions
Department of Health
Department of Health and Social Security
Department of National Heritage
Department of Social Security
Department of Trade and Industry
Export Credits Guarantee Department
Foreign and Commonwealth Office
HM Treasury
Home Office
Law Officers
Law Officers’ Departments
Leader of The House of Lords and Minister for Women
Lord Advocate’s Department
Ministry of Agriculture, Fisheries and Food
Ministry of Defence
Ministry of Justice
Ministry of Transport
Office of The Deputy Prime Minister
Office of The Leader of The House of Commons
Office of The Leader of The House of Lords
Office of The Leader of The House of Lords and Lord President of The Council
Prime Minister's Office
Scotland Office
Solicitor General
Wales Office
Department of Energy and Climate Change
Department for Children, Schools and Families
