# Supplementary material for: ScholarLens: extracting competences from research publications for the automatic generation of semantic user profiles
Source: PeerJ journal article supplement (doi:10.7717/peerj-cs.121), 2017-07-03
Supplement: Pipeline.zip [file Pipeline.zip › Pipeline/gate/plugins/ANNIE/resources/gazetteer/government/govt-departments-non-ministerial-abbreviations.lst]

ARA
BSC
COI
CCEW
CRND
CE
CPS
fFSA
FORCOMM
FSC
GAD
GEO
HMCE
HMRC
IR
LCD
NDO
NSG
OFSTED
Ofsted
OFREG
OFT
OFGEM
OFGAS
HMCIP
OPG
OPRAF
OFQUAL
Ofqual
ORR
OFTEL
OAGS
OIRR
OFLOT
OFWAT
POSTCOMM
PCO
PWLB
RFS
RCPO
RM
SFO
SSRA
TNA
UKSA
UKTI
Ofgem
Ofgas
Oftel
Ofwat
