# Supplementary material for: ScholarLens: extracting competences from research publications for the automatic generation of semantic user profiles
Source: PeerJ journal article supplement (doi:10.7717/peerj-cs.121), 2017-07-03
Supplement: Pipeline.zip [file Pipeline.zip › Pipeline/gate/plugins/ANNIE/resources/gazetteer/government/govt-departments-non-ministerial.lst]

Assets Recovery Agency
Building Societies Commission
Central Office of Information
Charity Commission
Charity Commission for England and Wales
Commissioners for the Reduction of The National Debt
Crown Estate
Crown Prosecution Service
Food Standards Agency
Forestry Commission
Friendly Societies Commission
Government Actuary’s Department
Government Equalities Office
HM Customs and Excise
HM Revenue & Customs
Inland Revenue
Lord Chancellor's Department
National Debt Office
National School of Government
Office for Standards In Education, Children’s Services and Schools
Office for The Regulation of Electricity and Gas
Office of Electricity Regulation
Office of Fair Trading
Office of Gas and Electricity Markets
Office of Gas Supply
Office of Her Majesty's Chief Inspector of Schools
Office of HM Paymaster General
Office of Passenger Rail Franchising
Office of Qualifications and Examinations Regulation
Office of Rail Regulation
Office of Telecommunications
Office of The Advocate General for Scotland
Office of The International Rail Regulator
Office of The National Lottery
Office of Water Services
Postal Services Commission
Privy Council Office
Public Works Loan Board
Registry of Friendly Societies
Revenue and Customs Prosecutions Office
Royal Mint
Serious Fraud Office
Shadow Strategic Rail Authority
The National Archives
UK Statistics Authority
UK Trade and Investment
