# Supplementary material for: ScholarLens: extracting competences from research publications for the automatic generation of semantic user profiles
Source: PeerJ journal article supplement (doi:10.7717/peerj-cs.121), 2017-07-03
Supplement: Pipeline.zip [file Pipeline.zip › Pipeline/gate/plugins/ANNIE/resources/gazetteer/government/govt-responsibility-categories.lst]

Business, industry, economics and finance     
Culture and leisure     
Environment     
Government, politics and public administration     
Health, well-being and care     
International affairs and defence      
People, community and housing     
Public inquiries and Royal Commissions     
Public order, justice and rights     
Transport, communication and technology     
Work, education and skills
