# Supplementary material for: ScholarLens: extracting competences from research publications for the automatic generation of semantic user profiles
Source: PeerJ journal article supplement (doi:10.7717/peerj-cs.121), 2017-07-03
Supplement: Pipeline.zip [file Pipeline.zip › Pipeline/gate/plugins/ANNIE/resources/gazetteer/government/list-case-sensitive.def]

govt-departments-ministerial-abbreviations.lst:department:ministerial
govt-departments-non-ministerial-abbreviations.lst:department:non-ministerial
executive-agencies-abbreviations.lst:agency:abbreviation
legislation-ending.lst:document-ending:legislation
report-ending.lst:document-ending:report
project.lst:project
project_keyword.lst:project_key
document_ending_other.lst:document-ending:legislation-other
document-pre.lst:document_pre
title-airforce.lst:military:airforce
title-navy.lst:military:navy
title-army.lst:military:army
title-medical.lst:medical
titles-other.lst:other
