# Supplementary material for: ScholarLens: extracting competences from research publications for the automatic generation of semantic user profiles
Source: PeerJ journal article supplement (doi:10.7717/peerj-cs.121), 2017-07-03
Supplement: Pipeline.zip [file Pipeline.zip › Pipeline/gate/plugins/ANNIE/resources/gazetteer/government/lists.def]

cabinet-positions.lst:position:cabinet
govt-departments-ministerial.lst:department:ministerial
govt-responsibility-categories.lst:government:responsibility
ministers-attending-cabinet.lst:minister:attending-cabinet
govt-departments-non-ministerial.lst:department:non-ministerial
cabinet-ministers.lst:minister:cabinet
executive-agencies.lst:agency
constituencies-england.lst:constituency:england
constituencies-n.ireland.lst:constituency:n-ireland
constituencies-scotland.lst:constituency:scotland
constituencies-wales.lst:constituency:wales
military-operations.lst:operations:military
wars.lst:war
org-other.lst:organization:other
org-military.lst:organization:military
org-law.lst:organization:law
org-political.lst:organization:other
war_key.lst:war_key
public-bodies-non-departmental.lst:organization:government
non-cabinet-minister-posts.lst:position:non-cabinet
military-operations-abbrev.lst:operations:military
