# Supplementary material for: ScholarLens: extracting competences from research publications for the automatic generation of semantic user profiles
Source: PeerJ journal article supplement (doi:10.7717/peerj-cs.121), 2017-07-03
Supplement: Pipeline.zip [file Pipeline.zip › Pipeline/gate/plugins/ANNIE/resources/gazetteer/government/military-operations-abbrev.lst]

Op Albion 
Op Hush
Op Kaiserschlacht 
Op Bl�cher-Yorck 
Op Gneisenau 
Op Georgette 
Op Michael 
Op Strafexpedition 
Op Z-O 
Op Ajax 
Op Atilla 
Op Cactus 
Op Chengiz Khan 
Op Claret 
Op Jock Scott 
Op Anvil 
Op Eagle Claw 
Op Earnest Will 
Op Eager Glacier 
Op Nimble Archer 
Op Praying Mantis 
Op Prime Chance 
Op Evening Light 
Op Gibraltar 
Op Grand Slam 
Op Lucky Alphonse 
Op Meghdoot 
Op Nimrod 
Op Paul Bunyan 
Op Sparrowhawk I
Op Sparrowhawk II
Op Sparrowhawk III 
Op Team Spirit 
Op Dwarka
Op Trident 
Op Berlin Airlift
Op Vittles  
Op Planefare  
Op Gladio 
Op Gold 
Op Neptune 
Op Reforger
Op Silver 
Op Banner 
Op Anadyr  
Op Kama 
Op Fortune 
Op Golden Pheasant 
Op Just Cause 
Op Acid Gambit 
Op Bushmaster 
Op Sand Flea  
Op Northwoods 
Op Waverider 
Op Peter Pan 
Op Phibriglex 
Op Power Pack 
Op Success 
Op Urgent Fury 
Op Overload 
Op Savannah 
Op Carlota 
Op Dingo 
Op Tangent 
Op Favour 
Op Reindeer 
Op Rekstok 
Op Safraan 
Op Klipklop 
Op Sceptic 
Op Protea 
Op Carnation 
Op Meebos 
Op Askari 
Op Alpha Centauri 
Op Modular 
Op Hooper 
Op Packer 
Op Bison 
Op Tacaud 
Op Manta 
Op �pervier 
Op Rosario Argentina 
Op Algeciras Argentina 
Op Azul Argentina 
Op Corporate  
Op Paraquet  
Op Black Buck  
Op Keyhole  
Op Purple Warrior 
Op Sutton  
Op Blowdown 
Op El Dorado Canyon 
Op Morning Light 
Op Morris Dance 
Op Mount Hope III 
Op Orion 
Op Castor 
Op Condor 
Op Lea 
Op Vulture 
Op Blue Hearts 
Op Courageous 
Op Commando 
Op Chromite 
Op Little Switch 
Op Big Switch 
Op Ripper 
Op Arc Light 
Op Babylift 
Op Barrel Roll 
Op Steel Tiger 
Op Tiger Hound 
Op Commando Hunt 
Op Bolo 
Op Chopper 
Op Cedar Falls 
Op Dewey Canyon 
Op Enhance Plus 
Op Flaming Dart 
Op Frequent Wind 
Op Game Warden 
Op Ballistic Charge
Op Beacon Star
Op Beacon Torch
Op Bear Bite
Op Bear Claw
Op Beau Charger
Op Beau Diddley
Op Beaver Cage
Op Bold Mariner
Op Boone
Op Canyon
Op Daring Rebel
Op Deckhouse Five 
Op DeSoto
Op Dragon Fire
Op Fortress Ridge
Op Seahawk
Op Sea Tiger
Op Market Time 
Op Hastings 
Op Homecoming 
Op Leap Frog 
Op Menu 
Op Malheur 
Op Pegasus 
Op Rich 
Op Linebacker 
Op Ranch Hand 
Op Trail Dust
Op Rolling Thunder 
Op Sealords 
Op Starlight 
Op Sunrise 
Op Tailwind 
Op Toan Thang 42 
Op Union I and II 
Op Safed Sager 
Op Amphibian 
Op Clean Corridor 
Op Ippocampo 
Op Silver Back 
Op Tamar 
Op Turquoise 
Op Addition 
Op Albatros 
Op Azure 
Op Barras 
Op Boleas 
Op Caravan 
Op Cordite 
Op Deliverance 
Op Eastern Exit 
Op Espresso 
Op Fibre 
Op Liberation 
Op Licorne 
Op Mistral 
Op Montego 
Op Murambatsvina 
Op Nilo 
Op Phillis 
Op Restore Hope 
Op Sharp Edge 
Op Shining Express 
Op Solace 
Op Tanker Two 
Op Teutonic 
Op Astute 
Op Citadel   
Op Chiron   
Op Faber  
Op Poinciana 
Op Seroja 
Op Stabilise  
Op Scorched Earth 
Op Spitfire  
Op Toucan   
Op Warden  
Op Otkos 10 
Op Orkan 91 
Op Harmony 
Op Tigar 
Op Meda?ki d�ep 
Op Bljesak 
Op Oluja 
Op Maritime Monitor 
Op Sky Monitor 
Op Deny Flight 
Op Neretva '93 
Op B�llebank 
Op Amanda 
Op Summer '95 
Op Sword '95 
Op Koridor '92 
Op Deliberate Force 
Op Tiger 
Op Maestral 
Op Ju�ni Potez 
Op Sana 
Op Pauk 
Op Una 
Op Joint Endeavor 
Op Joint Guard 
Op Joint Forge 
Op Allied Force 
Op Megaphone  
Op Potkova 
Op Quadrant  
Op Able Sentry 
Op Essential Harvest 
Op Forage  
Op Kinetic  
Op Echo  
Op Mountain Storm
Op Constable 
Op Uphold Democracy 
Op New Horizon 
Op Secure Tomorrow 
Op Desert Shield 
Op Desert Storm 
Op Granby  
Op Daguet 
Op Damask  
Op Operazione Locusta 
Op Desert Sabre 
Op Determination 
Op Ace Guard 
Op Record 
Op Provide Comfort 
Op Airone 
Op Southern Watch 
Op Desert Strike 
Op Northern Watch 
Op Desert Fox 
Op Anaconda
Op Arabian Scrotum
Op Archer
Op Argus
Op Asbury Park
Op Buzzard
Op Condor
Op Glock
Op Harpoon
Op Jacana
Op Mountain Resolve
Op Mountain Viper
Op Polar Harpoon
Op Ptarmigan
Op Red Wing
Op Snipe
Op River City
Op Crescent Wind
Op Relentless Strike
Op Rhino
Op Kaika
Op Kamin
Op Nasrat
Op Shahi Tandar
Op Diesel
Op Panchai Palang 
Op Oqab 
Op Khanjar 
Op Cobra's Anger
Op Moshtarak 
Op Tor Shezada
Op Hamkari
Op Iraqi Freedom 
Op Option North 
Op Bastille 
Op Falconer 
Op Antica Babilonia 
Op Northern Delay 
Op Airborne Dragon 
Op Planet X 
Op Peninsula Strike 
Op Desert Snowplough 
Op Desert Scorpion 
Op Spartan Scorpion 
Op Scorpion Sting 
Op Sidewinder 
Op Iron Bullet 
Op Tyr 
Op Telic 
Op Ivy Serpent 
Op Soda Mountain 
Op Catalyst 
Op White House 
Op Tapeworm 
Op Ivy Lightning 
Op Silverado 
Op Ivy Needle 
Op Longstreet 
Op Desert Thrust 
Op Chamberlain 
Op Industrial Sweep 
Op Tiger Clean Sweep 
Op Sweeny 
Op O.K. Corral 
Op Eagle Curtain 
Op All American Tiger 
Op Ivy Cyclone 
Op Boothill 
Op Ivy Cyclone II 
Op Rifles Blitz 
Op Rifle Sweep 
Op Bayonet Lightning 
Op Bulldog Mammoth 
Op Clear Area 
Op Abilene 
Op Panther Squeeze 
Op Red Dawn 
Op Panther Backroads 
Op Arrowhead Blizzard 
Op Ivy Blizzard 
Op Iron Justice 
Op Rifles Fury 
Op Devil Siphon 
Op Overcoat 
Op Salm 
Op Santa Strike 
Op Iron Force 
Op Iron Grip 
Op Choke Hold 
Op Gimlet Victory 
Op Hickory View 
Op I CAN 
Op Iron Fury II 
Op Lancer Lightning 
Op Windy City 
Op Warhorse Whirlwind 
Op Iron Resolve 
Op Clothes for Kids 
Op Market Sweep 
Op Saloon 
Op Centaur Fast Gas 
Op Rock Slide 
Op Wolfhound Trap II 
Op Wolfhound Fury II 
Op Wolverine Feast 
Op Final Cut 
Op Saber Turner II 
Op Tomahawk 
Op Trailblazer 
Op Eagle Liberty 3 
Op Devil Clinch 
Op Rocketman 
Op Aloha 
Op Centaur Rodeo 
Op Devil Thrust 
Op Soccor Ball 
Op Warrior 
Op Shillelagh 
Op Suicide Kings 
Op Iron Promise 
Op Duke Fortitude 
Op Iron Saber 
Op Lancer Fury 
Op Vigilant Resolve 
Op Resolute Sword 
Op Danger Fortitude 
Op Ripper Sweep 
Op Yellow Stone 
Op Rapier Thrust 
Op Spring Cleanup 
Op Thunderstruck 
Op Striker Hurricane 
Op Wolfpack Crunch 
Op Arrowhead Strike 10 
Op Student to Student 
Op Disarm 
Op Diyala Border Police Audit 
Op Giuliani 
Op Slim Shady 
Op Striker Tornado 
Op Rocketman III 
Op Dragon Victory 
Op Gimlet Crusader 
Op Gimlet Silent Sniper 
Op Haifa Street 
Op Oasis 
Op Outlaw Destroyer 
Op Mutual Security 
Op Tombstone Piledriver 
Op Mayfield III 
Op Cobra Sweep 
Op Quarterhorse Rides 
Op Warrior Resolve 
Op Tiger Care 
Op Phantom Linebacker 
Op Vanguard Thunder 
Op Cajun Mousetrap II 
Op Cajun Mousetrap III 
Op Iron Fury 
Op Showdown 
Op Wolverine 
Op Grizzly Forced Entry 
Op Clean Sweep 
Op True Grit 
Op Hurricane 
Op Black Typhoon 
Op Hurricane II 
Op Iron Fist II 
Op Longhorn 
Op Marne 
Op Predator 
Op Backpack 
Op Mustang Flex 
Op Ramadan Roundup 
Op Tangerine Pinch 
Op Wolfhound Fury 
Op Bulldog 
Op Centaur Strike II 
Op Centaur Strike III 
Op Mandarin Squeeze 
Op Mustang Socko 
Op Tiger Cub 
Op Tangerine Squeeze 
Op Crayon 
Op Duliyah Sunrise 
Op Dallas 
Op Tiger Fury 
Op Army Santa 
Op Duke Fury 
Op Phantom Fury 
Op Dawn 
Op Wolfhound Power 
Op Wolfhound Jab 
Op Rock Bottom 
Op Plymouth Rock 
Op Tobruk 
Op Wonderland 
Op Baton Rouge 
Op Falcon Freedom 
Op Soprano Sunset 
Op Iraqi Children 
Op Backbreaker 
Op Lion Cub 
Op Powder River 
Op Triple Play 
Op Attleboro
Op Dunlap 
Op East Lansing 
Op Hudson 
Op Moon 
Op Moving Forward 
Op Neighborhood Watch 
Op Spider Web 
Op Vacant City 
Op River Walk 
Op Lanthonid 
Op Therapist 
Op Hedgehog 
Op Copperas Cove 
Op Keystone Sweep 
Op Checkmate 
Op Big Dig 
Op Centaur Showdown 
Op River Blitz 
Op River Bridge 
Op Lightning 
Op Unforgiven 
Op Swashbuckle 
Op Fontana 
Op Block Party 
Op Grey Wolf II 
Op Badlands 
Op Scrimmage 
Op Outer Banks 
Op Quicksweep 
Op Clear Decision 
Op Cobweb 
Op Matador 
Op Block Party II 
Op Mongoose 
Op Peninsula 
Op Squeeze Play 
Op Chepultepec 
Op New Market
Op Moon River Dragon 
Op San Juan 
Op Pitchfork 
Op Uhaser 
Op Woodstock 
Op Spear 
Op White Shield 
Op Dagger
Op Strategic Separation 
Op Sword
Op Shadyville 
Op Hunter
Op Seahorse 
Op Sergeant Thea'a 
Op Thunder 
Op Demon Digger 
Op Muthana Strike 
Op Bow Country 
Op Scimitar 
Op Warriors Rage 
Op Quickstrike 
Op Able Warrior 
Op Restoring Rights 
Op Cyclone
Op Flea Flicker 
Op National Unity 
Op Clydesdale 
Op Mountaineers
Op Carentan 
Op Constitution Hammer 
Op Iron Fist 
Op Bowie 
Op Saratoga 
Op River Gate 
Op Doctor 
Op Open Window 
Op Tigers 
Op Wolf Stalk II 
Op Great Lakes 
Op Shank
Op Steel Curtain
Op Knockout 
Op Kennesaw Dragon 
Op Panthers 
Op Bruins
Op Lions
Op Iron Hammer
Op Green Trident 
Op Rams
Op Skinner
Op Able Rising Force 
Op Bull Dawg Chariot 
Op Liberty Express 
Op Industrial Revolution 
Op Iron Arrow I 
Op Post Hawk 
Op Unified Fist 
Op Baghdad is Beautiful 
Op King Tut 
Op Red Bull 
Op Falcon Sweep 
Op Red Bull II 
Op Final Strike 
Op Smokewagon 
Op PitBull 
Op God help us 
Op Dirty Harry 
Op Minotaur 
Op Swamp Fox 
Op Raging Bull 
Op Raging Bull II 
Op Jaws V 
Op El Toro Loco 
Op Glory Light 
Op Mr. Rogers' Neighborhood. 
Op Focus 
Op Scales of Justice 
Op Swarmer 
Op Cowpens 
Op Northern Lights 
Op Scorpion 
Op Red Light II 
Op Cobra Strike 
Op Harvest Lights 
Op Money Worth 
Op Sterling 
Op Hastings 
Op Bastogne 
Op Bold Action 
Op Swift Sword 
Op Babil Perimeter 
Op Dragons Breath 
Op Lion Hunt II 
Op Stallion Run 
Op Lion 
Op Lightning Blitz 
Op Tropical Lightning 
Op Unified Front 
Op Lofty Summit 
Op Iron Triangle 
Op Barnstormer 
Op Chepultepec 
Op Tinto 
Op Coolspring VIII 
Op Roaring Tiger 
Op Cool Carpet 
Op Together Forward 
Op Sand Storm 
Op Iron Gate 
Op Relentless Hunt 
Op Gaugamela 
Op River Falcon 
Op Thundercat 
Op Floodlight 
Op Guardian Tiger IV 
Op Passage 
Op Rubicon 
Op Constant Solidarity 
Op Yorktown 
Op Iron Arrow II 
Op Commando Hunter 
Op SOUK 
Op Half Nelson 
Op Medusa 
Op Benefit Day 
Op Dealer 
Op Helping Hand 
Op Trifecta 
Op Talon 
Op Polar Black Diamond 
Op Polar Valor 
Op Cougar 
Op Arctic Sunrise 
Op Eagle Watch 
Op Moonlight 
Op Gladiator 
Op Beastmaster 
Op Arrowhead Strike VI 
Op Green Angel 
Op Three Swords 
Op Michigan 
Op White Rockets 
Op Locust 
Op Three Kings 
Op Arrowhead Strike III 
Op Turki Bowl 
Op Turki Bowl II 
Op Machete Harvest 
Op Koa Canyon 
Op Howard 
Op Arbead II 
Op Northern Venture 
Op Warm-Up 
Op Black Eagle II 
Op Eagle Claw XI 
Op Tomahawk Strike 11 
Op New Day 
Op SINBAD 
Op Wolverine Alesia 
Op Brown Hawk 
Op Saber Boss 
Op Ranger Dominance 
Op Agave L 
Op Tomahawk Strike 12 
Op Phoenix 
Op Dragon Surge 
Op Arrowhead Strike 9 
Op Enduring Education 
Op Regular Justice 
Op Valiant Guardian 
Op Black Eagle 
Op Black Eagle City 
Op Dixon 
Op Yukon River 
Op Eagle Lightning 
Op School Supplies 
Op Commando Dive 
Op Eagle Dive I 
Op Polar Dive 
Op Trident IV 
Op Chalons 
Op Eagle Dive II 
Op Forsythe Park 
Op Polar Scrum 
Op Rat Trap 
Op Eagle Thunder III 
Op Beach Yellow 
Op Southern Scimitar 
Op Valdez 
Op Dragon Fire East 
Op Red Eagle 
Op Safe Neighborhood 
Op Vipers Bite 
Op Alljah 
Op Safety and Security 
Op Northern Forge 
Op Northern Fury 
Op Cave Dweller 
Op Eagle Sweep 
Op Falkirk 
Op Hermes 
Op Polar Charade 
Op Brutus 
Op Tiger Hammer 
Op Northwestern Shoulder 
Op Eagle Talon 
Op Phantom Thunder 
Op Marne Torch 
Op Nijmegen 
Op Ardennes 
Op Chosin 
Op Destroyer Strike 
Op Castine 
Op Arrowhead Ripper 
Op Commando Eagle 
Op Sledgehammer 
Op Peregrine II 
Op Crazyhorse Thunder 
Op Blore Heath II 
Op Bullrun 
Op Cobra Strike 
Op Council Grove II 
Op Golden Eagle II 
Op Eagle Venture IV 
Op Eagles 
Op Guardian Torch 
Op Geronimo Strike II 
Op Justice Reach 
Op Nijemgen II 
Op Patriot Strike 
Op Dragon Hammer 
Op Geronimo Strike 
Op Four Brothers 
Op Stampede 3 
Op Grenada 
Op Safe Teach 
Op China Shop 
Op China Shop II 
Op Eastern Fury 
Op Geronimo Strike III 
Op Saber Guardian 
Op Leyte Gulf 
Op Eagle Ares 
Op Waterfront 
Op Polar Tempest 
Op Bellicose Bastian 
Op Ithaca 
Op Mawtini 
Op Punisher III 
Op Purple Haze 
Op Marne Avalanche 
Op Ameliyet 
Op Iraqi Home Protector 
Op Olympus 
Op Iraqi Heart 
Op Rogue Thunder 
Op Iron Blitz 
Op Woodshed 
Op Rogue Stomp 
Op Pegasus Bridge 
Op Jalil 
Op New Blue 
Op Wickersham II 
Op Wickersham 
Op Winston-Salem 
Op Firecracker 
Op Hoplite 
Op William Wallace 
Op Banzeen 
Op Lightning Hammer 
Op Phantom Strike 
Op Police Victory 
Op Pericles 
Op Snake River 
Op Marne Husky 
Op Chesterfield 
Op Little Man 
Op Dragon Fox 
Op Crimson Shogun 
Op Falcon Fury II 
Op Combined Justice 
Op Powerline 
Op Church 
Op Gecko 
Op Street Sweeper II 
Op Eagle Chickmauga 
Op Hit and Run 
Op Comanche Swarm III 
Op Gator Inn 
Op K 
Op Black Shark 
Op Lightning Hammer II 
Op Tuwaitha Sunrise 
Op Wickersham III 
Op Justice League 
Op Rock Hammer 
Op Falcon Fury 
Op Tacoma III 
Op Greywolf Hammer II 
Op Gun Barrel City 
Op Viking Clampdown III 
Op Dragon Talon II 
Op Marne Torch II 
Op Bethel 
Op Viking Snatch 
Op Gecko III A 
Op Bear 
Op Gold Digger 
Op Anchorage 
Op Rock Drill 
Op Eagle Shiloh III 
Op Elfin Cove 
Op Belleau Wood 
Op Bell Hurriyah 
Op Gecko IIIB 
Op Bone Breaker 
Op Iron Reaper 
Op Marne Thunderbolt 
Op Rock Reaper 
Op Phantom Phoenix 
Op Raider Harvest 
Op Iron Harvest 
Op Marne Grand Slam 
Op Marne Rugged 
Op Sawlat al-Fursan 
Op Estonia 
Op Manchu Harvest III 
Op Marne Piledriver 
Op Restore Peace VI 
Op Lions Roar 
Op Balad Musalahah
Op Siegfried Line
Op Gravel Dump
Op Spring Break
Op al Salam
Op Lion Hunt
Op New Town
Op Iron Roundup II
Op Lions Paw
Op Eagle North
Op Monmouth
Op Viper Pursuit
Op Iron Gator
Op Goodwill
Op Glad Tidings of Benevolence II
Op Legion Pursuit II
Op New Dawn 
Op Mar Lewe
