# Supplementary material for: ScholarLens: extracting competences from research publications for the automatic generation of semantic user profiles
Source: PeerJ journal article supplement (doi:10.7717/peerj-cs.121), 2017-07-03
Supplement: Pipeline.zip [file Pipeline.zip › Pipeline/gate/plugins/ANNIE/resources/gazetteer/government/military-operations.lst]

Operation Albion 
Operation Hush
Operation Kaiserschlacht 
Operation Bl�cher-Yorck 
Operation Gneisenau 
Operation Georgette 
Operation Michael 
Operation Strafexpedition 
Operation Z-O 
Operation Ajax 
Operation Atilla 
Operation Cactus 
Operation Chengiz Khan 
Operation Claret 
Operation Jock Scott 
Operation Anvil 
Operation Eagle Claw 
Operation Earnest Will 
Operation Eager Glacier 
Operation Nimble Archer 
Operation Praying Mantis 
Operation Prime Chance 
Operation Evening Light 
Operation Gibraltar 
Operation Grand Slam 
Operation Lucky Alphonse 
Operation Meghdoot 
Operation Nimrod 
Operation Paul Bunyan 
Operation Sparrowhawk I
Operation Sparrowhawk II
Operation Sparrowhawk III 
Operation Team Spirit 
Operation Dwarka
Operation Trident 
Operation Berlin Airlift
Operation Vittles  
Operation Planefare  
Operation Gladio 
Operation Gold 
Operation Neptune 
Operation Reforger
Operation Silver 
Operation Banner 
Operation Anadyr  
Operation Kama 
Operation Fortune 
Operation Golden Pheasant 
Operation Just Cause 
Operation Acid Gambit 
Operation Bushmaster 
Operation Sand Flea  
Operation Northwoods 
Operation Waverider 
Operation Peter Pan 
Operation Phibriglex 
Operation Power Pack 
Operation Success 
Operation Urgent Fury 
Operation Overload 
Operation Savannah 
Operation Carlota 
Operation Dingo 
Operation Tangent 
Operation Favour 
Operation Reindeer 
Operation Rekstok 
Operation Safraan 
Operation Klipklop 
Operation Sceptic 
Operation Protea 
Operation Carnation 
Operation Meebos 
Operation Askari 
Operation Alpha Centauri 
Operation Modular 
Operation Hooper 
Operation Packer 
Operation Bison 
Operation Tacaud 
Operation Manta 
Operation �pervier 
Operation Rosario Argentina 
Operation Algeciras Argentina 
Operation Azul Argentina 
Operation Corporate  
Operation Paraquet  
Operation Black Buck  
Operation Keyhole  
Operation Purple Warrior 
Operation Sutton  
Operation Blowdown 
Operation El Dorado Canyon 
Operation Morning Light 
Operation Morris Dance 
Operation Mount Hope III 
Operation Orion 
Operation Castor 
Operation Condor 
Operation Lea 
Operation Vulture 
Operation Blue Hearts 
Operation Courageous 
Operation Commando 
Operation Chromite 
Operation Little Switch 
Operation Big Switch 
Operation Ripper 
Operation Arc Light 
Operation Babylift 
Operation Barrel Roll 
Operation Steel Tiger 
Operation Tiger Hound 
Operation Commando Hunt 
Operation Bolo 
Operation Chopper 
Operation Cedar Falls 
Operation Dewey Canyon 
Operation Enhance Plus 
Operation Flaming Dart 
Operation Frequent Wind 
Operation Game Warden 
Operation Ballistic Charge
Operation Beacon Star
Operation Beacon Torch
Operation Bear Bite
Operation Bear Claw
Operation Beau Charger
Operation Beau Diddley
Operation Beaver Cage
Operation Bold Mariner
Operation Boone
Operation Canyon
Operation Daring Rebel
Operation Deckhouse Five 
Operation DeSoto
Operation Dragon Fire
Operation Fortress Ridge
Operation Seahawk
Operation Sea Tiger
Operation Market Time 
Operation Hastings 
Operation Homecoming 
Operation Leap Frog 
Operation Menu 
Operation Malheur 
Operation Pegasus 
Operation Rich 
Operation Linebacker 
Operation Ranch Hand 
Operation Trail Dust
Operation Rolling Thunder 
Operation Sealords 
Operation Starlight 
Operation Sunrise 
Operation Tailwind 
Operation Toan Thang 42 
Operation Union I and II 
Operation Safed Sager 
Operation Amphibian 
Operation Clean Corridor 
Operation Ippocampo 
Operation Silver Back 
Operation Tamar 
Operation Turquoise 
Operation Addition 
Operation Albatros 
Operation Azure 
Operation Barras 
Operation Boleas 
Operation Caravan 
Operation Cordite 
Operation Deliverance 
Operation Eastern Exit 
Operation Espresso 
Operation Fibre 
Operation Liberation 
Operation Licorne 
Operation Mistral 
Operation Montego 
Operation Murambatsvina 
Operation Nilo 
Operation Phillis 
Operation Restore Hope 
Operation Sharp Edge 
Operation Shining Express 
Operation Solace 
Operation Tanker Two 
Operation Teutonic 
Operation Astute 
Operation Citadel   
Operation Chiron   
Operation Faber  
Operation Poinciana 
Operation Seroja 
Operation Stabilise  
Operation Scorched Earth 
Operation Spitfire  
Operation Toucan   
Operation Warden  
Operation Otkos 10 
Operation Orkan 91 
Operation Harmony 
Operation Tigar 
Operation Meda?ki d�ep 
Operation Bljesak 
Operation Oluja 
Operation Maritime Monitor 
Operation Sky Monitor 
Operation Deny Flight 
Operation Neretva '93 
Operation B�llebank 
Operation Amanda 
Operation Summer '95 
Operation Sword '95 
Operation Koridor '92 
Operation Deliberate Force 
Operation Tiger 
Operation Maestral 
Operation Ju�ni Potez 
Operation Sana 
Operation Pauk 
Operation Una 
Operation Joint Endeavor 
Operation Joint Guard 
Operation Joint Forge 
Operation Allied Force 
Operation Megaphone  
Operation Potkova 
Operation Quadrant  
Operation Able Sentry 
Operation Essential Harvest 
Operation Forage  
Operation Kinetic  
Operation Echo  
Operation Mountain Storm
Operation Constable 
Operation Uphold Democracy 
Operation New Horizon 
Operation Secure Tomorrow 
Operation Desert Shield 
Operation Desert Storm 
Operation Granby  
Operation Daguet 
Operation Damask  
Operation Operazione Locusta 
Operation Desert Sabre 
Operation Determination 
Operation Ace Guard 
Operation Record 
Operation Provide Comfort 
Operation Airone 
Operation Southern Watch 
Operation Desert Strike 
Operation Northern Watch 
Operation Desert Fox 
Operation Anaconda
Operation Arabian Scrotum
Operation Archer
Operation Argus
Operation Asbury Park
Operation Buzzard
Operation Condor
Operation Glock
Operation Harpoon
Operation Jacana
Operation Mountain Resolve
Operation Mountain Viper
Operation Polar Harpoon
Operation Ptarmigan
Operation Red Wing
Operation Snipe
Operation River City
Operation Crescent Wind
Operation Relentless Strike
Operation Rhino
Operation Kaika
Operation Kamin
Operation Nasrat
Operation Shahi Tandar
Operation Diesel
Operation Panchai Palang 
Operation Oqab 
Operation Khanjar 
Operation Cobra's Anger
Operation Moshtarak 
Operation Tor Shezada
Operation Hamkari
Operation Iraqi Freedom 
Operation Option North 
Operation Bastille 
Operation Falconer 
Operation Antica Babilonia 
Operation Northern Delay 
Operation Airborne Dragon 
Operation Planet X 
Operation Peninsula Strike 
Operation Desert Snowplough 
Operation Desert Scorpion 
Operation Spartan Scorpion 
Operation Scorpion Sting 
Operation Sidewinder 
Operation Iron Bullet 
Operation Tyr 
Operation Telic 
Operation Ivy Serpent 
Operation Soda Mountain 
Operation Catalyst 
Operation White House 
Operation Tapeworm 
Operation Ivy Lightning 
Operation Silverado 
Operation Ivy Needle 
Operation Longstreet 
Operation Desert Thrust 
Operation Chamberlain 
Operation Industrial Sweep 
Operation Tiger Clean Sweep 
Operation Sweeny 
Operation O.K. Corral 
Operation Eagle Curtain 
Operation All American Tiger 
Operation Ivy Cyclone 
Operation Boothill 
Operation Ivy Cyclone II 
Operation Rifles Blitz 
Operation Rifle Sweep 
Operation Bayonet Lightning 
Operation Bulldog Mammoth 
Operation Clear Area 
Operation Abilene 
Operation Panther Squeeze 
Operation Red Dawn 
Operation Panther Backroads 
Operation Arrowhead Blizzard 
Operation Ivy Blizzard 
Operation Iron Justice 
Operation Rifles Fury 
Operation Devil Siphon 
Operation Overcoat 
Operation Salm 
Operation Santa Strike 
Operation Iron Force 
Operation Iron Grip 
Operation Choke Hold 
Operation Gimlet Victory 
Operation Hickory View 
Operation I CAN 
Operation Iron Fury II 
Operation Lancer Lightning 
Operation Windy City 
Operation Warhorse Whirlwind 
Operation Iron Resolve 
Operation Clothes for Kids 
Operation Market Sweep 
Operation Saloon 
Operation Centaur Fast Gas 
Operation Rock Slide 
Operation Wolfhound Trap II 
Operation Wolfhound Fury II 
Operation Wolverine Feast 
Operation Final Cut 
Operation Saber Turner II 
Operation Tomahawk 
Operation Trailblazer 
Operation Eagle Liberty 3 
Operation Devil Clinch 
Operation Rocketman 
Operation Aloha 
Operation Centaur Rodeo 
Operation Devil Thrust 
Operation Soccor Ball 
Operation Warrior 
Operation Shillelagh 
Operation Suicide Kings 
Operation Iron Promise 
Operation Duke Fortitude 
Operation Iron Saber 
Operation Lancer Fury 
Operation Vigilant Resolve 
Operation Resolute Sword 
Operation Danger Fortitude 
Operation Ripper Sweep 
Operation Yellow Stone 
Operation Rapier Thrust 
Operation Spring Cleanup 
Operation Thunderstruck 
Operation Striker Hurricane 
Operation Wolfpack Crunch 
Operation Arrowhead Strike 10 
Operation Student to Student 
Operation Disarm 
Operation Diyala Border Police Audit 
Operation Giuliani 
Operation Slim Shady 
Operation Striker Tornado 
Operation Rocketman III 
Operation Dragon Victory 
Operation Gimlet Crusader 
Operation Gimlet Silent Sniper 
Operation Haifa Street 
Operation Oasis 
Operation Outlaw Destroyer 
Operation Mutual Security 
Operation Tombstone Piledriver 
Operation Mayfield III 
Operation Cobra Sweep 
Operation Quarterhorse Rides 
Operation Warrior Resolve 
Operation Tiger Care 
Operation Phantom Linebacker 
Operation Vanguard Thunder 
Operation Cajun Mousetrap II 
Operation Cajun Mousetrap III 
Operation Iron Fury 
Operation Showdown 
Operation Wolverine 
Operation Grizzly Forced Entry 
Operation Clean Sweep 
Operation True Grit 
Operation Hurricane 
Operation Black Typhoon 
Operation Hurricane II 
Operation Iron Fist II 
Operation Longhorn 
Operation Marne 
Operation Predator 
Operation Backpack 
Operation Mustang Flex 
Operation Ramadan Roundup 
Operation Tangerine Pinch 
Operation Wolfhound Fury 
Operation Bulldog 
Operation Centaur Strike II 
Operation Centaur Strike III 
Operation Mandarin Squeeze 
Operation Mustang Socko 
Operation Tiger Cub 
Operation Tangerine Squeeze 
Operation Crayon 
Operation Duliyah Sunrise 
Operation Dallas 
Operation Tiger Fury 
Operation Army Santa 
Operation Duke Fury 
Operation Phantom Fury 
Operation Dawn 
Operation Wolfhound Power 
Operation Wolfhound Jab 
Operation Rock Bottom 
Operation Plymouth Rock 
Operation Tobruk 
Operation Wonderland 
Operation Baton Rouge 
Operation Falcon Freedom 
Operation Soprano Sunset 
Operation Iraqi Children 
Operation Backbreaker 
Operation Lion Cub 
Operation Powder River 
Operation Triple Play 
Operation Attleboro
Operation Dunlap 
Operation East Lansing 
Operation Hudson 
Operation Moon 
Operation Moving Forward 
Operation Neighborhood Watch 
Operation Spider Web 
Operation Vacant City 
Operation River Walk 
Operation Lanthonid 
Operation Therapist 
Operation Hedgehog 
Operation Copperas Cove 
Operation Keystone Sweep 
Operation Checkmate 
Operation Big Dig 
Operation Centaur Showdown 
Operation River Blitz 
Operation River Bridge 
Operation Lightning 
Operation Unforgiven 
Operation Swashbuckle 
Operation Fontana 
Operation Block Party 
Operation Grey Wolf II 
Operation Badlands 
Operation Scrimmage 
Operation Outer Banks 
Operation Quicksweep 
Operation Clear Decision 
Operation Cobweb 
Operation Matador 
Operation Block Party II 
Operation Mongoose 
Operation Peninsula 
Operation Squeeze Play 
Operation Chepultepec 
Operation New Market
Operation Moon River Dragon 
Operation San Juan 
Operation Pitchfork 
Operation Uhaser 
Operation Woodstock 
Operation Spear 
Operation White Shield 
Operation Dagger
Operation Strategic Separation 
Operation Sword
Operation Shadyville 
Operation Hunter
Operation Seahorse 
Operation Sergeant Thea'a 
Operation Thunder 
Operation Demon Digger 
Operation Muthana Strike 
Operation Bow Country 
Operation Scimitar 
Operation Warriors Rage 
Operation Quickstrike 
Operation Able Warrior 
Operation Restoring Rights 
Operation Cyclone
Operation Flea Flicker 
Operation National Unity 
Operation Clydesdale 
Operation Mountaineers
Operation Carentan 
Operation Constitution Hammer 
Operation Iron Fist 
Operation Bowie 
Operation Saratoga 
Operation River Gate 
Operation Doctor 
Operation Open Window 
Operation Tigers 
Operation Wolf Stalk II 
Operation Great Lakes 
Operation Shank
Operation Steel Curtain
Operation Knockout 
Operation Kennesaw Dragon 
Operation Panthers 
Operation Bruins
Operation Lions
Operation Iron Hammer
Operation Green Trident 
Operation Rams
Operation Skinner
Operation Able Rising Force 
Operation Bull Dawg Chariot 
Operation Liberty Express 
Operation Industrial Revolution 
Operation Iron Arrow I 
Operation Post Hawk 
Operation Unified Fist 
Operation Baghdad is Beautiful 
Operation King Tut 
Operation Red Bull 
Operation Falcon Sweep 
Operation Red Bull II 
Operation Final Strike 
Operation Smokewagon 
Operation PitBull 
Operation God help us 
Operation Dirty Harry 
Operation Minotaur 
Operation Swamp Fox 
Operation Raging Bull 
Operation Raging Bull II 
Operation Jaws V 
Operation El Toro Loco 
Operation Glory Light 
Operation Mr. Rogers' Neighborhood. 
Operation Focus 
Operation Scales of Justice 
Operation Swarmer 
Operation Cowpens 
Operation Northern Lights 
Operation Scorpion 
Operation Red Light II 
Operation Cobra Strike 
Operation Harvest Lights 
Operation Money Worth 
Operation Sterling 
Operation Hastings 
Operation Bastogne 
Operation Bold Action 
Operation Swift Sword 
Operation Babil Perimeter 
Operation Dragons Breath 
Operation Lion Hunt II 
Operation Stallion Run 
Operation Lion 
Operation Lightning Blitz 
Operation Tropical Lightning 
Operation Unified Front 
Operation Lofty Summit 
Operation Iron Triangle 
Operation Barnstormer 
Operation Chepultepec 
Operation Tinto 
Operation Coolspring VIII 
Operation Roaring Tiger 
Operation Cool Carpet 
Operation Together Forward 
Operation Sand Storm 
Operation Iron Gate 
Operation Relentless Hunt 
Operation Gaugamela 
Operation River Falcon 
Operation Thundercat 
Operation Floodlight 
Operation Guardian Tiger IV 
Operation Passage 
Operation Rubicon 
Operation Constant Solidarity 
Operation Yorktown 
Operation Iron Arrow II 
Operation Commando Hunter 
Operation SOUK 
Operation Half Nelson 
Operation Medusa 
Operation Benefit Day 
Operation Dealer 
Operation Helping Hand 
Operation Trifecta 
Operation Talon 
Operation Polar Black Diamond 
Operation Polar Valor 
Operation Cougar 
Operation Arctic Sunrise 
Operation Eagle Watch 
Operation Moonlight 
Operation Gladiator 
Operation Beastmaster 
Operation Arrowhead Strike VI 
Operation Green Angel 
Operation Three Swords 
Operation Michigan 
Operation White Rockets 
Operation Locust 
Operation Three Kings 
Operation Arrowhead Strike III 
Operation Turki Bowl 
Operation Turki Bowl II 
Operation Machete Harvest 
Operation Koa Canyon 
Operation Howard 
Operation Arbead II 
Operation Northern Venture 
Operation Warm-Up 
Operation Black Eagle II 
Operation Eagle Claw XI 
Operation Tomahawk Strike 11 
Operation New Day 
Operation SINBAD 
Operation Wolverine Alesia 
Operation Brown Hawk 
Operation Saber Boss 
Operation Ranger Dominance 
Operation Agave L 
Operation Tomahawk Strike 12 
Operation Phoenix 
Operation Dragon Surge 
Operation Arrowhead Strike 9 
Operation Enduring Education 
Operation Regular Justice 
Operation Valiant Guardian 
Operation Black Eagle 
Operation Black Eagle City 
Operation Dixon 
Operation Yukon River 
Operation Eagle Lightning 
Operation School Supplies 
Operation Commando Dive 
Operation Eagle Dive I 
Operation Polar Dive 
Operation Trident IV 
Operation Chalons 
Operation Eagle Dive II 
Operation Forsythe Park 
Operation Polar Scrum 
Operation Rat Trap 
Operation Eagle Thunder III 
Operation Beach Yellow 
Operation Southern Scimitar 
Operation Valdez 
Operation Dragon Fire East 
Operation Red Eagle 
Operation Safe Neighborhood 
Operation Vipers Bite 
Operation Alljah 
Operation Safety and Security 
Operation Northern Forge 
Operation Northern Fury 
Operation Cave Dweller 
Operation Eagle Sweep 
Operation Falkirk 
Operation Hermes 
Operation Polar Charade 
Operation Brutus 
Operation Tiger Hammer 
Operation Northwestern Shoulder 
Operation Eagle Talon 
Operation Phantom Thunder 
Operation Marne Torch 
Operation Nijmegen 
Operation Ardennes 
Operation Chosin 
Operation Destroyer Strike 
Operation Castine 
Operation Arrowhead Ripper 
Operation Commando Eagle 
Operation Sledgehammer 
Operation Peregrine II 
Operation Crazyhorse Thunder 
Operation Blore Heath II 
Operation Bullrun 
Operation Cobra Strike 
Operation Council Grove II 
Operation Golden Eagle II 
Operation Eagle Venture IV 
Operation Eagles 
Operation Guardian Torch 
Operation Geronimo Strike II 
Operation Justice Reach 
Operation Nijemgen II 
Operation Patriot Strike 
Operation Dragon Hammer 
Operation Geronimo Strike 
Operation Four Brothers 
Operation Stampede 3 
Operation Grenada 
Operation Safe Teach 
Operation China Shop 
Operation China Shop II 
Operation Eastern Fury 
Operation Geronimo Strike III 
Operation Saber Guardian 
Operation Leyte Gulf 
Operation Eagle Ares 
Operation Waterfront 
Operation Polar Tempest 
Operation Bellicose Bastian 
Operation Ithaca 
Operation Mawtini 
Operation Punisher III 
Operation Purple Haze 
Operation Marne Avalanche 
Operation Ameliyet 
Operation Iraqi Home Protector 
Operation Olympus 
Operation Iraqi Heart 
Operation Rogue Thunder 
Operation Iron Blitz 
Operation Woodshed 
Operation Rogue Stomp 
Operation Pegasus Bridge 
Operation Jalil 
Operation New Blue 
Operation Wickersham II 
Operation Wickersham 
Operation Winston-Salem 
Operation Firecracker 
Operation Hoplite 
Operation William Wallace 
Operation Banzeen 
Operation Lightning Hammer 
Operation Phantom Strike 
Operation Police Victory 
Operation Pericles 
Operation Snake River 
Operation Marne Husky 
Operation Chesterfield 
Operation Little Man 
Operation Dragon Fox 
Operation Crimson Shogun 
Operation Falcon Fury II 
Operation Combined Justice 
Operation Powerline 
Operation Church 
Operation Gecko 
Operation Street Sweeper II 
Operation Eagle Chickmauga 
Operation Hit and Run 
Operation Comanche Swarm III 
Operation Gator Inn 
Operation K 
Operation Black Shark 
Operation Lightning Hammer II 
Operation Tuwaitha Sunrise 
Operation Wickersham III 
Operation Justice League 
Operation Rock Hammer 
Operation Falcon Fury 
Operation Tacoma III 
Operation Greywolf Hammer II 
Operation Gun Barrel City 
Operation Viking Clampdown III 
Operation Dragon Talon II 
Operation Marne Torch II 
Operation Bethel 
Operation Viking Snatch 
Operation Gecko III A 
Operation Bear 
Operation Gold Digger 
Operation Anchorage 
Operation Rock Drill 
Operation Eagle Shiloh III 
Operation Elfin Cove 
Operation Belleau Wood 
Operation Bell Hurriyah 
Operation Gecko IIIB 
Operation Bone Breaker 
Operation Iron Reaper 
Operation Marne Thunderbolt 
Operation Rock Reaper 
Operation Phantom Phoenix 
Operation Raider Harvest 
Operation Iron Harvest 
Operation Marne Grand Slam 
Operation Marne Rugged 
Operation Sawlat al-Fursan 
Operation Estonia 
Operation Manchu Harvest III 
Operation Marne Piledriver 
Operation Restore Peace VI 
Operation Lions Roar 
Operation Balad Musalahah
Operation Siegfried Line
Operation Gravel Dump
Operation Spring Break
Operation al Salam
Operation Lion Hunt
Operation New Town
Operation Iron Roundup II
Operation Lions Paw
Operation Eagle North
Operation Monmouth
Operation Viper Pursuit
Operation Iron Gator
Operation Goodwill
Operation Glad Tidings of Benevolence II
Operation Legion Pursuit II
Operation New Dawn 
Operation Mar Lewe
Op MAR LEWE
Operation MAR LEWE
