# Supplementary material for: ScholarLens: extracting competences from research publications for the automatic generation of semantic user profiles
Source: PeerJ journal article supplement (doi:10.7717/peerj-cs.121), 2017-07-03
Supplement: Pipeline.zip [file Pipeline.zip › Pipeline/gate/plugins/ANNIE/resources/gazetteer/government/ministers-attending-cabinet.lst]

Francis Maude
Oliver Letwin
David Willetts
George Young
Patrick McLoughlin
Dominic Grieve
