# Supplementary material for: ScholarLens: extracting competences from research publications for the automatic generation of semantic user profiles
Source: PeerJ journal article supplement (doi:10.7717/peerj-cs.121), 2017-07-03
Supplement: Pipeline.zip [file Pipeline.zip › Pipeline/gate/plugins/ANNIE/resources/gazetteer/government/non-cabinet-minister-posts.lst]

Minister for the Natural and Marine Environment, Wildlife and Rural Affairs
Third Sector Minister
Minister for the Third Sector
Minister for the Cabinet Office
Minister of state, Cabinet Office
Minister of state (universities and science)
Parliamentary chief secretary to the Treasury and chief whip
Minister of state
Exchequer Secretary
Minister of state (minister for security)
Minister of state (minister for immigration)
Minister of state (minister for police)
Minister of state (minister for the armed forces)
Minister for Immigration
Minister for Police
Minister for Security
Minister for the Armed Forces
Minister for Universities and Science
Lords Chief Whip
Minister for the Cabinet Office and Paymaster General
Minister of State – Cabinet Office
Parliamentary Secretary to the Treasury and Chief Whip
Parliamentary Under Secretary of State
Government Whip
Deputy Chief Whip (Treasurer of HM Household)
Deputy Chief Whip (Comptroller of HM Household)
Government Whip (Vice Chamberlain of HM Household)
Deputy Chief Whip (Captain of The Queen’s Bodyguard of the Yeomen of the Guard) 
Vice Chamberlain of HM Household
Captain of the Honourable Corps of Gentlemen at Arms
Captain of The Queen’s Bodyguard of the Yeomen of the Guard
Prime Minister's Spokesman
PMS
Secretariat to the Criminal Procedure Rule Committee 
