# Supplementary material for: ScholarLens: extracting competences from research publications for the automatic generation of semantic user profiles
Source: PeerJ journal article supplement (doi:10.7717/peerj-cs.121), 2017-07-03
Supplement: Pipeline.zip [file Pipeline.zip › Pipeline/gate/plugins/ANNIE/resources/gazetteer/government/org-law.lst]

Judicial Committee of the Privy Council
JCPC
Supreme Court of the United Kingdom
Court of Appeal
High Court of Justice
High Court judge
County Court
Supreme Court
County Court Bulk Centre
Supreme Court of the United Kingdom
Court of Appeal
High Court of Justice
Crown Court
Magistrates' Court
