# Supplementary material for: ScholarLens: extracting competences from research publications for the automatic generation of semantic user profiles
Source: PeerJ journal article supplement (doi:10.7717/peerj-cs.121), 2017-07-03
Supplement: Pipeline.zip [file Pipeline.zip › Pipeline/gate/plugins/ANNIE/resources/gazetteer/government/org-military.lst]

NATO
North Atlantic Treaty Organization
North Atlantic Treaty Organisation
Royal Navy
Royal Air Force
RAF
Army
British Army
