# Supplementary material for: ScholarLens: extracting competences from research publications for the automatic generation of semantic user profiles
Source: PeerJ journal article supplement (doi:10.7717/peerj-cs.121), 2017-07-03
Supplement: Pipeline.zip [file Pipeline.zip › Pipeline/gate/plugins/ANNIE/resources/gazetteer/government/org-other.lst]

Scottish Parliament
Welsh Assembly Government
European Union
EU
U.S. Government
League of Nations
Commonwealth of Nations
United Nations
UN
OPEC
BRIC
African League of Nations
House of Lords
Court of Appeal
Administrative Court
Her Majesty's Courts Service
Criminal Procedure Rule Committee
