# Supplementary material for: ScholarLens: extracting competences from research publications for the automatic generation of semantic user profiles
Source: PeerJ journal article supplement (doi:10.7717/peerj-cs.121), 2017-07-03
Supplement: Pipeline.zip [file Pipeline.zip › Pipeline/gate/plugins/ANNIE/resources/gazetteer/government/org-political.lst]

British National Party
BNP
Christian Party "Proclaiming Christ's Lordship"
Conservative Party
Co-operative Party
Green Party
Labour Party
Liberal Democrats
New Party
Plaid Cymru
Scottish Green Party
Scottish National Party
SNP
Socialist Labour Party
SLP
Socialist Party of GB
UK Independence Party
UKIP
European Parliament
