# Supplementary material for: ScholarLens: extracting competences from research publications for the automatic generation of semantic user profiles
Source: PeerJ journal article supplement (doi:10.7717/peerj-cs.121), 2017-07-03
Supplement: Pipeline.zip [file Pipeline.zip › Pipeline/gate/plugins/ANNIE/resources/gazetteer/government/project.lst]

Digital Britain
Digital Economy Programme
London 2012
Behaviour Improvement Programme
Improving Behaviour in Schools
Get Connected
New Deal
New Deal for Communities
SureStart
Welfare to Work
Enterprise Investment Scheme
Children's Plan
National Challenge
Apollo 11
