# Supplementary material for: ScholarLens: extracting competences from research publications for the automatic generation of semantic user profiles
Source: PeerJ journal article supplement (doi:10.7717/peerj-cs.121), 2017-07-03
Supplement: Pipeline.zip [file Pipeline.zip › Pipeline/gate/plugins/ANNIE/resources/gazetteer/government/public-bodies-non-departmental.lst]

Administration of Radioactive Substances Advisory Committee
Administrative Justice and Tribunal Council
Adult Learning Inspectorate
Advantage West Midlands
Advisory Board on Family Law
Advisory Board on Naturalisation and Integration
Advisory Board on Registration of Homoeopathic Medicines
Advisory Board on Restricted Patients
Advisory Board on the Registration of Homoeopathic Products
Advisory Body on Fair Trading in Telecommunications
Advisory Committee for the Joint Environmental Markets Unit
Advisory Committee for the Public Lending Right
Advisory Committee for Wales
Advisory Committee of the Therapeutic Professions Allied to Medicine (Northern Ireland)
Advisory Committee on Advertising
Advisory Committee on Animal Feedingstuffs
Advisory Committee on Animal Feedstuffs
Advisory Committee on Antimicrobial Resistance and Healthcare Associated Infection
Advisory Committee on Borderline Substances
Advisory Committee on Breast Cancer Screening
Advisory Committee on Business and the Environment
Advisory Committee on Business Appointments
Advisory Committee on Carbon Abatement Technologies
Advisory Committee on Clinical Excellence Awards
Advisory Committee on Coal Research (ACCR)
Advisory Committee on Conscientious Objectors
Advisory Committee on Consumer Engagement
Advisory Committee on Dangerous Pathogens
Advisory Committee on Dental Establishments
Advisory Committee on Design Quality in the NHS
Advisory Committee on Distinction Awards
Advisory Committee on General Commissioners of Income Tax
Advisory Committee on Genetic Testing
Advisory Committee on Hazardous Substances
Advisory Committee on Historic Wreck Sites
Advisory Committee on Justices of the Peace in England and Wales
Advisory Committee on Juvenile Court Lay Panel (NI)
Advisory Committee on Legal Education and Conduct
Advisory Committee on National Historic Ships
Advisory Committee on NHS Drugs
Advisory Committee on Novel Foods and Processes
Advisory Committee on Organic Standards
Advisory Committee on Overseas Economic and Social Research
Advisory Committee on Packaging
Advisory Committee on Pesticides
Advisory Committee on Plant and Machinery
Advisory Committee on Releases to the Environment
Advisory Committee on Research
Advisory Committee on Scotland's Travelling People
Advisory Committee on Service Candidates
Advisory Committee on Sites of Special Scientific Interest
Advisory Committee on Telecommunications for Disabled and Elderly People
Advisory Committee on the Design of Coins, Medals, Seals and Decorations
Advisory Committee on the Government Art Collection
Advisory Committee on the Microbiological Safety of Food
Advisory Committee on the Micro-biological Safety of Food
Advisory Committee on the Safety of Blood Tissues and Organs
Advisory Committees on General Commissioners of Income Tax
Advisory Committees on General Commissioners of Income Tax (NI)
Advisory Committees on Justices of the Peace
Advisory Committees on Justices of the Peace (NI)
Advisory Committees on Justices of the Peace in England and Wales
Advisory Committees on Justices of the Peace in Lancashire, Greater Manchester and Merseyside
Advisory Council on Libraries
Advisory Council on National Records and Archives
Advisory Council on Public Records
Advisory Council on the Misuse of Drugs
Advisory Group on Hepatitis
Advisory Group on Medical Countermeasures
Advisory Group on Military Medicine
Advisory Panel for the Beacon Scheme
Advisory Panel on Beacon Councils
Advisory Panel on Country Information
Advisory Panel on Public Sector Information
Advisory Panel on Standards for Planning Inspectorate
Advisory Panel on Standards for the Planning Inspectorate
Advisory, Conciliation & Arbitration Service (ACAS)
Advisory, Conciliation and Arbitration Service
Agricultural and Horticultural Development Board
Agricultural Dwelling House Advisory Committee
Agricultural Dwelling House Advisory Committees
Agricultural Dwelling House Advisory Committees (ADHAC)
Agricultural Dwelling House Advisory Committees (Wales)
Agricultural Land Tribunal (Wales)
Agricultural Land Tribunals
Agricultural Land Tribunals (England)
Agricultural Research and Biological Institutes - Governing Bodies
Agricultural Research Institute of Northern Ireland
Agricultural Wages Board for England and Wales
Agricultural Wages Board for Northern Ireland
Agricultural Wages Committees
Agricultural Wages Committees (AWC) (Wales)
Agriculture Advisory Panel for Wales
Air Quality Expert Group
Alcohol Education and Research Council
Ancient Monuments Board for Scotland
Ancient Monuments Board for Wales
Animal Health and Welfare Strategy England Implementation Group
Animal Procedures Committee
Animal Welfare Advisory Committee
Appeals Panel
Apple and Pear Research Council (APRC)
Appointments Commission
Armed forces Pay Review Body
Arts and Humanities Research Council
Arts Council England
Arts Council of England
Arts Council of Northern Ireland
Arts Council of Wales
Ashworth Hospital Authority
Assessment Panel for Construction Research
Asylum Support Adjudicators
Audit Commission for Local Authorities and the National Health Service in England and Wales
Authorised Conveyancing Practitioners Board
Aviation Committee
Bank of England
Belfast Education and Library Board
Better Regulation Task force
Big Lottery Fund
Biotechnology and Biological Sciences Research Council
Biotechnology and Biological Sciences Research Council (BBSRC)
Birmingham Heartlands Urban Development Corporation
Black Country Urban Development Corporation
Boards of Visitors and Visiting Committees (Northern Ireland)
Boards of Visitors to Penal Establishments
Boundary Commission for England
Boundary Commission for Northern Ireland
Boundary Commission for Scotland
Boundary Commission for Wales
Britain-Russia Centre
British Association for Central and Eastern Europe
British Board of Agrément
British Broadcasting Corporation
British Coal Corporation
British Council
British Educational Communications and Technology Agency
British Film Institute
British Government Panel on Sustainable Development
British Hallmarking Council
British Library
British Museum
British Nuclear Fuels plc
British Overseas Trade Board
British Pharmacopeia Commission
British Pharmacopoeia Commission
British Potato Council
British Railways Board
British Shipbuilders
British Tourist Authority (BTA)
British Transport Police Authority
British Waterways Board
Broadcasting Standards Commission
Broadmoor Hospital Authority
Building Regulations Advisory Committee
Building Standards Advisory Committee
Business Advisory Committee on Telecommunications
Caledonian MacBrayne Ltd
Capacitybuilders
Capital for Enterprise Ltd
Cardiff Bay Development Corporation
Care Quality Commission
Care Standards Tribunal
Castle Vale Housing Action Trust
Central Adjudication Services
Central Advisory Committee on Justices of the Peace (Scotland)
Central Advisory Committee on Pensions and Compensation
Central Advisory Committee on War Pensions
Central Arbitration Committee
Central Council for Education and Training in Social Work (UK)
Central Dental Advisory Committee (Northern Ireland)
Central Medical Advisory Committee (Northern Ireland)
Central Nursing Advisory Committee (Northern Ireland)
Central Personal Social Services Advisory Committee (Northern Ireland)
Central Pharmaceutical Advisory Committee (Northern Ireland)
Central Police Training and Development Authority (CENTREX)
Centre for Information on Language Teaching and Research
Channel Four Television Corporation
Charities Advisory Committee (Northern Ireland)
Child Maintenance and Enforcement Commission
Child Support Appeal Tribunals
Child Support Appeal Tribunals (CSATs) (Northern Ireland)
Children and Family Court Advisory and Support Service
Children’s Workforce Development Council
Children's Panel
Children's Panels Advisory Committees
Churches Conservation Trust
Citizen's Charter Panel of Advisers
Civil Aviation Authority
Civil Justice Council
Civil Nuclear Police Authority
Civil Procedure Rule Committee
Civil Service Appeal Board
Clinical Engineering and Medical Physics Services Advisory Committee (Northern Ireland)
Clinical Imaging Services Advisory Committee (Northern Ireland)
Clinical Standards Advisory Group
Coal Authority
Commission for Architecture and the Built Environment
Commission for Integrated Transport
Commission for Patient and Public Involvement in Health
Commission for Racial Equality
Commission for Rural Communities
Commission for Social Care Inspection
Commission for the Compact
Commission for the New Towns
Commission on Human Medicines
Commissioner for Protection Against Unlawful Industrial Action
Commissioner for the Rights of Trade Union Members
Committee for Monitoring Agreements on Tobacco Advertising and Sponsorship
Committee of Investigation for Great Britain
Committee on Agricultural Valuation
Committee on Carcinogenicity of Chemicals in Food, Consumer Products and the Environment
Committee on Climate Change
Committee on Medical Aspects of Food and Nutrition Policy
Committee on Medical Aspects of Radiation in the Environment
Committee on Mutagenicity of Chemicals in Food, Consumer Products and the Environment
Committee on Products and Processes for Use in Public Water Supply
Committee on Radioactive Waste Management
Committee on Standards in Public Life
Committee on the Medical Effects of Air Pollutants
Committee on the Safety of Devices
Committee on the Safety of Medicines
Committee on Toxicity of Chemicals in Food, Consumer Products and the Environment
Common Services Agency of the Scottish Health Service
Commons Commissioners
Commonwealth Development Corporation
Commonwealth Institute
Commonwealth Scholarship Commission
Commonwealth Scholarship Commission in the UK
Community Development Foundation
Competition Appeal Tribunal
Competition Commission
Competition Service
Construction Industry Training Board
Construction Industry Training Board (CITB)
Construction Industry Training Board (Northern Ireland)
Consultative Panel on Badgers and Bovine Tuberculosis
Consumer Consultative Bodies (Department of Trade and Industry)
Consumer Consultative Bodies (Office of the Rail Regulator)
Consumer Council for Postal Services (known as Postwatch)
Consumer Council for Water
Consumer Focus
Consumer Panel
Consumers' Committee for Great Britain under the Agricultural Marketing Act 1958
Copyright Tribunal
Council for Catholic Maintained Schools (Northern Ireland)
Council for Central Laboratory of Research Councils
Council for Nature Conservation and the Countryside (Northern Ireland)
Council for Science and Technology
Council for the Central Laboratory of the Research Councils (CCLRC)
Council on Tribunals
Countryside Commission
Countryside Council for Wales
County Court Rule Committee
Courts Board
Courts Boards
Courts Boards 
Covent Garden Market Authority
Crafts Council
Crime Prevention Agency Board
Criminal Cases Review Commission
Criminal Injuries Compensation Appeals Panel (CICAP)
Criminal Injuries Compensation Appeals Panel for Northern Ireland
Criminal Injuries Compensation Authority
Criminal Injuries Compensation Authority (CICA)
Criminal Injuries Compensation Board (CICB)
Criminal Justice Inspection Northern Ireland
Criminal Procedure Rule Committee
Crofters' Commission
Crown Agents Holding and Realisation Board
Crown Court Rule Committee
Culture East Midlands
Culture North East
Culture Northwest
Culture South East
Culture South West
Culture West Midlands
Curriculum and Assessment Authority for Wales (ACAC)
Customer Service Committees
Cycling England
Dairy Produce Quota Tribunal
Dartmoor Steering Group and Working Party
Darwin Advisory Committee
Darwin Initiative Advisory Committee
Data Protection Tribunal
Deer Commission for Scotland
Defence Nuclear Safety Committee
Defence Scientific Advisory Council
Defence Scientific Advisory Council, its supporting Boards and Register of Members
Dental Practice Board
Dental Rates Study Group
Dental Vocational Training Authority
Design Council
Development Board for Rural Wales
Diplomatic Service Appeal Board
Disability Appeal Tribunals
Disability Appeal Tribunals (DATs) (Northern Ireland)
Disability Employment Advisory Committee
Disability Living Allowance Advisory Board
Disability Living Allowance Advisory Board for Northern Ireland
Disability Rights Commission
Disabled Persons Transport Advisory Committee
Distinction and Meritorious Service Awards Committee (Northern Ireland)
Doctor and Dentists Review Body
Doctors' and Dentists' Review Body
Drainage Council for Northern Ireland
East Midlands Development Agency
East Midlands Region Electricity Consumers' Committee
East of England Development Agency
East of Scotland Water Authority
Eastern Health and Social Services Board (Northern Ireland)
Eastern Health and Social Services Council (Northern Ireland)
Eastern Region Electricity Consumers' Committee
Economic and Social Research Council
Economic and Social Research Council (ESRC)
Education and Library Boards (Northern Ireland)
Education Assets Board
Electricity Consumers' Committees
Employment Appeal Tribunal
Employment Tribunals
Energy Advisory Panel (EAP)
Engineering and Physical Sciences Research Council
Engineering and Physical Sciences Research Council (EPSRC)
Engineering Construction Industry Training Board
Engineering Construction Industry Training Board (ECITB)
English Advisory Committee on Telecommunications
English Heritage
English Heritage (Historic Buildings and Monuments Commission for England)
English Marketing Advisory Board
English National Board for Nursing, Midwifery and Health Visiting
English Nature
English Partnerships
English Sports Council
English Tourist Board (ETB)
Enterprise Ulster
Environment Agency
Equal Opportunities Commission
Equal Opportunities Commission for Northern Ireland
Equality 2025
Equality and Human Rights Commission
Equality Commission for Northern Ireland
Expert Advisory Group on AIDS
Expert Group on Cryptosporidium in Water Supplies
Expert Panel on Air Quality Standards
Export Action Group for Building Materials
Export Guarantees Advisory Council
Extra Parliamentary Panel
Fair Employment Commission for Northern Ireland
Fair Employment Tribunal (Northern Ireland)
Family Health Services Appeal Authority
Family Justice Council
Family Procedure Rule Committee
Family Proceedings Rules Committee
Farm Animal Genetic Resources Group
Farm Animal Welfare Council
FHS Appeal Authority
Film Industry Training Board
Financial Services Tribunal
Fire Authority for Northern Ireland
Firearms Consultative Committee
Firebuy
Fisheries Conservancy Board for Northern Ireland (FCBNI)
Fleet Air Arm Museum
Food Advisory Committee
Food from Britain
Football Licensing Authority
foreign Compensation Commission
foresight Steering Group
Foyle Fisheries Commission
Fuel Cell Advisory Panel
Fuel Poverty Advisory Group
Funding Agency for Schools (FAS)
Further Education Funding Council for England
Further Education Funding Council for Wales
Futurebuilders Advisory Panel
Gambling Commission
Gaming Board for Great Britain
Gangmasters Licensing Authority
Gas and Electricity Consumer Council (Energy Watch)
Gas Consumers' Council
GB Sports Council
Geffrye Museum
Gene Therapy Advisory Committee
General Advisory Committee on Science
General Commissioners of Income Tax
General Commissioners of Income Tax (GCIT)
General Consumer Council for Northern Ireland
General Lighthouse Authorities
General Social Care Council
General Teaching Council for Scotland
Genetics and Insurance Committee
Government Hospitality Advisory Committee for the Purchase of Wine
Government Hospitality Fund Advisory Committee for the Purchase of Wine
Great Britain – China Centre
Hannah Research Institute
Health and Safety Agency for Northern Ireland
Health and Safety Commission
Health and Safety Executive
Health and Social Services Boards (Northern Ireland)
Health and Social Services Councils (Northern Ireland)
Health and Social Services Trusts (Northern Ireland)
Health Appointments Advisory Committee
Health Authorities (HA) (Wales)
Health Authorities (HAs)
Health Authorities and Trusts
Health Boards (Scotland)
Health Education Authority
Health Education Board for Scotland
Health Promotion Authority for Wales
Health Protection Agency
Healthcare Commission
Healthcare Commission (Commission for Healthcare Audit and Inspection)
Hearing Aid Council
Herbal Medicines Advisory Committee
Higher Education Funding Council for England
Higher Education Funding Council for England Industrial Training Boards
Higher Education Funding Council for Wales
Highlands and Islands Airports Ltd
Highlands and Islands Enterprise
Hill Farming Advisory Committee for England, Wales and Northern Ireland
Hill Farming Advisory Committee for England, Wales and Northern Ireland (HFAC)
Hill Farming Advisory Committee for Scotland
Hill Farming Advisory Sub-Committee for Wales
Historic Buildings Council (Northern Ireland)
Historic Buildings Council for Scotland
Historic Buildings Council for Wales
Historic Monuments Council (Northern Ireland)
HM Revenue and Customs
HM Treasury
Home Grown Cereals Authority
Home-Grown Cereals Authority
Homes and Communities Agency
Honorary Investment Advisory Committee
Horniman Museum
Horniman Public Museum and Public Park Trust
Horse Race Betting Levy Appeal Tribunal for Scotland
Horserace Betting Levy Appeal Tribunal for England and Wales
Horserace Betting Levy Appeals Tribunal for England & Wales
Horserace Betting Levy Board
Horserace Betting Levy Tribunal
Horserace Totalisator Board
Horticultural Development Council (HDC)
Horticulture Development Council
Horticulture Research International
House of Lords Appointments Commission
Housing Action Trusts
Housing Benefit Review Body (Northern Ireland)
Housing Corporation
Human Fertilisation and Embryology Authority
Human Genetics Advisory Commission
Human Genetics Commission
Human Tissue Authority
Immigration Appeal Tribunal
Immigration Appellate Authorities
Imperial War Museum
Independent Advisory Group on Sexual Health and HIV
Independent Advisory Group on Teenage Pregnancy
Independent Agricultural Appeals Panel
Independent Assessor for Police Service NI Recruitment Vetting
Independent Board of Visitors for Military Corrective Training Centres
Independent Board of Visitors for the Military Corrective Training Centre
Independent Housing Ombudsman Ltd
Independent Living Fund
Independent Living Funds
Independent Monitoring Board
Independent Monitoring Boards of Prisons, Immigration Removal Centres and Immigration
Independent Police Complaints Commission
Independent Reconfiguration Panel
Independent Review Panel for Advertising
Independent Review Panel for Classification of Borderline Products
Independent Safeguarding Authority
Independent Scientific Group on Cattle TB
Independent Television Commission (ITC)
Independent Tribunal Service
Indian Family Pension Funds Body of Commissioners
Industrial Development Advisory Board
Industrial Development Board for Northern Ireland
Industrial Injuries Advisory Council
Industrial Research and Technology Unit (Advisory Board) (Northern Ireland)
Industrial Tribunals (IT)
Information Commissioner’s Office
Inland Waterways Advisory Council
Inland Waterways Amenity Advisory Council
Insolvency Practitioners Tribunal
Insolvency Practitioners' Tribunal
Insolvency Rules Committee
Intelligence Services Tribunal
Interception of Communications Tribunal
Investigatory Powers Tribunal
Investors in People UK
Joint Committee on Vaccination and Immunisation
Joint Nature Conservation Committee
Joint Nature Conservation Committee (JNCC)
Judicial Appointments Commission
Judicial Studies Board
Justices of the Peace Advisory Committees
Know-How Fund Advisory Board
Laboratory Services Advisory Commitee (Northern Ireland)
Labour Relations Agency (Northern Ireland)
Laganside Corporation
Land Authority for Wales
Land Registration Rule Committee
Lands Tribunal
Lands Tribunal for Scotland (LTS)
Law Commission
Law Reform Advisory Committee for Northern Ireland
Learning and Skills Council
LEASE (The Leasehold Advisory Service)
Legal Aid Advisory Committee (NI)
Legal Aid Board
Legal Deposit Advisory Panel
Legal Services Board
Legal Services Commission
Legal Services Consultative Panel
Library and Information Commission
Library and Information Services Council (Wales)
LINK Board
Liverpool Housing Action Trust
Livestock & Meat Commission for Northern Ireland
Living East
Local Better Regulation Office
Local Enterprise Development Unit (Northern Ireland)
Local Goverment Staff Commission (Northern Ireland)
Local Government Boundary Commission (Wales)
Local Government Boundary Commission for Scotland
Local Government Commission for England
Local Government Property Commission
Local Government Residuary Body (England)
Local Government Staff Commission (England)
London Docklands (LDDC) Urban Development Corporation
London Pensions Fund Authority
London Region Electricity Consumers' Committee
London Regional Passengers' Committee
London Regional Transport
London Thames Gateway Development Corporation
Low Pay Commission
Macaulay Land Use Research Institute
Magnox Electric plc
Main Honours Advisory Committee
Marshall Aid Commemoration Commission
Measurement Advisory Committee
Meat and Livestock Commission
Meat and Livestock Commission (MLC)
Meat Hygiene Appeals Tribunals (England and Wales)
Medical Appeal Tribunals
Medical Appeal Tribunals (MATs) (Northern Ireland)
Medical Education England
Medical Practices Committee
Medical Research Council
Medical Research Council (MRC)
Medical Workforce Standing Advisory Committee
Medicines Commission
Mental Health Act Commission
Mental Health Commission for Northern Ireland
Mental Health Review Tribunal
Mental Health Review Tribunal for Northern Ireland
Mental Welfare Commission for Scotland
Merseyside
Merseyside and North Wales Region Electricity Consumers' Committee
Merseyside Urban Development Corporation
Metropolitan Police Committee
Microbiological Advisory Committee
Microbiological Research Authority
Midlands Region Electricity Consumers' Committee
Migration Advisory Committee
Milk Development Council
Milk Development Council (MDC)
Millennium Commission
Misuse of Drugs Advisory Body
Misuse of Drugs Professional Panel
Misuse of Drugs Tribunal
Monitor – Independent Regulator of NHS Foundation Trusts
Monopolies and Mergers Commission
Moredun Research Institute
Museum of London
Museum of Science and Industry
Museum of Science and Industry in Manchester
Museums and Galleries
Museums and Galleries Commission
Museums, Libraries and Archives Council
National Advisory Council on Employment of People with Disabilities (NACEPD)
National Army Museum
National Biological Standards Board
National Biological Standards Board (UK)
National Blood Authority
National Board for Nursing,
National Board for Nursing, Midwifery and Health Visiting for Northern Ireland
National College for School Leadership
National Community forum
National Consumer Council
National Consumers' Consultative Committee (NCCC)
National Council for Educational Technology
National Council for Vocational Qualifications (NCVQ)
National Disability Council (NDC)
National DNA Database Ethics Board
National Employer Advisory Board
National Employers' Liaison Committee
National Employment Panel
National Endowment for Science, Technology and the Arts
National Film and Television School (NFTS)
National forest Company
National Galleries of Scotland
National Gallery
National Health Service Litigation Authority
National Health Service Supplies Authority
National Health Service Tribunal
National Health Service Trusts
National Health Service Trusts (Scotland)
National Health Service Trusts (Wales)
National Heritage Memorial Fund
National Housing and Planning Advice Unit
National Information Governance Board
National Joint Registry Steering Committee
National Library of Scotland
National Library of Wales
National Lottery Charities Board
National Lottery Commission
National Maritime Museum
National Museum of Science and Industry
National Museum of Scotland
National Museums and Galleries of Wales
National Museums and Galleries on Merseyside
National Museums Liverpool
National Policing Improvement Agency
National Portrait Gallery
National Radiological Protection Board
National Research Development Corporation (NRDC)
National Specialist Commissioning Advisory Group
National Standing Committee for Farm Animal Genetic Resources
Natural England
Natural Environment Research Council
Natural Environment Research Council (NERC)
Natural History Museum
Nature Conservancy Council for England (English Nature)
North Eastern Education and Library Board (Northern Ireland)
North Eastern Region Electricity Consumers' Committee
North Hull Housing Action Trust
North of Scotland Region Electricity Consumers' Committee
North of Scotland Water Authority
North West Development Agency
North Western Region Electricity Consumers' Committee
Northern Health and Social Services Boards (Northern Ireland)
Northern Health and Social Services Councils (Northern Ireland)
Northern Ireland Advisory Committee on Telecommunications
Northern Ireland Advisory Committee on Travellers
Northern Ireland Blood Transfusion Service Agency
Northern Ireland Building Regulations Advisory Committee
Northern Ireland Central Services Agency (NICSA)
Northern Ireland Citizen's Charter Advisory Panel
Northern Ireland Commissioner for Protection Against Unlawful Industrial Action
Northern Ireland Commissioner for the Rights of Trade Union Members
Northern Ireland Construction Industry Advisory Council
Northern Ireland Consumer Committee for Electricity
Northern Ireland Council for Post Graduate Medical and Dental Education
Northern Ireland Council for the Curriculum, Examinations and Assessment (NICCEA)
Northern Ireland Disability Council (NIDC)
Northern Ireland Economic Council
Northern Ireland Fishery Harbour Authority
Northern Ireland Guardian Ad Litem Agency (NIGALA)
Northern Ireland Health and Social Services Boards
Northern Ireland Health and Social Services Councils
Northern Ireland Health Promotion Agency
Northern Ireland Higher Education Council
Northern Ireland Housing Executive (NIHE)
Northern Ireland Human Rights Commission
Northern Ireland Industrial Court
Northern Ireland Industrial Tribunals
Northern Ireland Judicial Appointments Commission
Northern Ireland Law Commission
Northern Ireland Legal Services Commission
Northern Ireland Local Government Officers' Superannuation Committee
Northern Ireland Museums Council
Northern Ireland Police Fund
Northern Ireland Policing Board
Northern Ireland Regional Medical Physics Agency (NIRMPA)
Northern Ireland Review Body (Operator and Vehicle Licensing)
Northern Ireland Tourist Board
Northern Ireland Transport Holding Company
Northern Ireland Water Council
Northern Lighthouse Board
Nuclear Decommissioning Authority
Nuclear Liabilities Financing Assurance Board
Nuclear Powered Warships Safety Committee
Nuclear Research Advisory Council
Nuclear Weapons Safety Committee
Nurses and Other Health Professions Review Body
Nurses', Midwives' and other NHS Professions' Review Body
Occupational Pensions Board (OPB)
Occupational Pensions Regulatory Authority (OPRA)
Office for Fair Access
Office of Surveillance Commissioners
Office of the Children’s Commissioner for England
Office of the Data Protection Registrar
Office of the Immigration Services Commissioner
Office of the Police Ombudsman for Northern Ireland
offshore Industry Liaison Committee
ofWAT National Customer Council
Oil and Pipelines Agency
Olympic Delivery Authority
Olympic Lottery Distributor
One North East
OSO Board
Overseas Projects Board
Overseas Service Pensions Scheme Advisory Board
Parades Commission for Northern Ireland
Parliamentary Boundary Commission for England
Parliamentary Boundary Commission for Scotland
Parliamentary Boundary Commission for Wales
Parole Board
Parole Board for Scotland
Particle Physics and Astronomy Research Council
Particle Physics and Astronomy Research Council (PPARC)
Partnership for Schools
Passenger Focus (Rail Passengers Council)
Patient Information Advisory Group
Pension Protection Fund Ombudsman
Pensions Appeal Tribunal
Pensions Appeal Tribunal for Scotland (PATS)
Pensions Compensation Board
Pensions Ombudsman
Personal Accounts Delivery Authority
Persons Hearing Consumer Credit Licensing Appeals
Persons Hearing Estate Agent Appeals
Persons Hearing Estate Agents Appeals
Pesticides Residue Committee
Pharmacists' Review Panel
Pig Production Development Committee (Northern Ireland)
Place Names Advisory Committee (Wales)
Planning Appeals Commission (Northern Ireland)
Plant Varieties and Seeds Tribunal
Plymouth Urban Development Corporation
Poisons Board
Poisons Board (Northern Ireland)
Police Advisory Board for England and Wales
Police Advisory Board for Scotland
Police Appeals Tribunal
Police Appeals Tribunals
Police Arbitration Tribunal
Police Authority for Northern Ireland
Police Complaints Authority
Police Discipline Appeals Tribunal
Police Negotiating Board
Policyholders' Protection Board
Political Honours Scrutiny Committee
Post Office
Post Office Users' Councils for Scotland, Wales
Post Office Users' National Council
Post Qualification Education Board for Health Service Pharmacists in Scotland
Prescription Pricing Authority
Prison Service Pay Review Body
Probation Board for Northern Ireland
Probation Trusts
Property Advisory Group
Public Health Laboratory Service Board
Public Lending Right
Public Lending Right Advisory Committee
Qualifications and Curriculum Authority
Quality Improvement Agency
Race Relations Employment Advisory Group
Radio Authority
Radioactive Waste Management Advisory Committee
Rail Passengers Council
Rail Users' Consultative Committees and Central Rail Users' Consultative Committee
Railway Heritage Committee
Rampton Hospital Authority
Rathgael and Whiteabbey Training Schools Management Board
Regional Advisory Committees
Regional Flood Defence Committees
Regional Industrial Development Boards
Regional Panels
Registered Homes Tribunal
Registered Homes Tribunal (Northern Ireland)
Registered Inspectors (RgI) Appeals Tribunal
Registrar of Public Lending Right (PLR)
Remploy Limited
Remploy Ltd
Renewable Energy Advisory Committee
Renewable Fuels Agency
Renewables Advisory Board
Rent Assessment Panel (RAP) (Northern Ireland)
Rent Assessment Panel for Scotland
Rent Assessment Panel for Wales (RAP)
Rent Assessment Panels (RAPs)
Rent Assessment Panels/Residential Property Tribunal Service
Research Councils
Residuary Body for Wales
Review Board for Government Contracts
Review Body on Doctors and Dentists Remuneration
Reviewing Committee on the Export of Works of Art
Reviewing Committee on the Export of Works of Art and Objects of Cultural Interest
Rooms (IMB)
Rowett Research Institute
Royal Air force Museum
Royal Armouries
Royal Armouries Museum
Royal Botanic Garden, Edinburgh
Royal Botanic Gardens, Kew
Royal College of Defence Studies Advisory Board
Royal Commission on Ancient and Historical Monuments in Wales
Royal Commission on Environmental Pollution
Royal Commission on Historical Manuscripts
Royal Commission on the Ancient and Historical
Royal Commission on the Historical Monuments of England
Royal Fine Art Commission
Royal Fine Art Commission for Scotland
Royal Marines Museum
Royal Military College of Science Advisory Council
Royal Mint Advisory Committee on the Design of Coins, Medals, Seals and Decorations.
Royal Naval Museum
Royal Navy Submarine Museum
Royal Ulster Constabulary George Cross Foundation
Rural Development Commission
Scheme of Compensation for Loss of Employment through Civil Unrest (Northern Ireland)
School Curriculum and Assessment Authority (SCAA)
School Food Trust
School Support Staff Negotiating Body
School Teachers Review Body
School Teachers' Review Body
Science Advisory Council
Science and Technology Facilities Council
Scientific Advisory Committee on Nutrition
Scientific Committee on Tobacco and Health
Scottish Advisory Committee on Drug Misuse
Scottish Advisory Committee on Telecommunications
Scottish Advisory Committee on the Medical Workforce
Scottish Agricultural Consultative Panel
Scottish Agricultural Wages Board
Scottish Arts Council
Scottish Children's Reporter Administration
Scottish Community Education Council
Scottish Consultative Council on the Curriculum
Scottish Conveyancing and Executry Services Board
Scottish Council for Educational Technology
Scottish Council for Postgraduate Medical and Dental Education
Scottish Crime Prevention Council
Scottish Crop Research Institute
Scottish Economic Council
Scottish Environment Protection Agency
Scottish Further Education Unit
Scottish Higher Education Funding Council
Scottish Homes
Scottish Hospital Endowments Research Trust
Scottish Hospital Trust
Scottish Industrial Development Advisory Board
Scottish Law Commission
Scottish Legal Aid Board
Scottish Medical Practices Committee
Scottish Natural Heritage
Scottish Police College Board of Governors
Scottish Qualifications Authority
Scottish Records Advisory Council
Scottish Screen
Scottish Seed Potato Development Council
Scottish Sports Council
Scottish Standing Committee for the Calculation of Residual Values of Fertilisers and Feeding Stuffs
Scottish Studentship Selection Committee
Scottish Tourist Board
Scottish Transport Group
Scottish Valuation and Rating Council
Scottish Water and Sewerage Customers Council
Sea Fish Industry Authority
Secretary of State for Scotland's Advisory Group on Sustainable Development
Secretary of State's (Electricity) Fisheries Committee
Secretary of State's Advisory Panel of Economic Consultants
Section 706 Tribunal
Section 706/04 Tribunal
Sector Skills Development Agency
Security Commission
Security Industry Authority
Security Service Tribunal
Security Vetting Appeals Panel
Senior Salaries Review Body
Sentencing Advisory Panel
Sentencing Guidelines Council
Serious Organised Crime Agency
Sheffield Urban Development Corporation
Sianel Pedwar Cymru (S4C) (Welsh Fourth Channel Authority)
Sir John Sloane’s Museum
Sir John Soane’s Museum
Sir John Soane's Museum
SITPRO Limited
SITPRO Ltd
Small Business Investment Taskforce
Social Security Advisory Committee
Social Security and Child Support Appeals
Social Security Appeal Tribunals
Social Security Appeal Tribunals (SSATs) (Northern Ireland)
South East England Development Agency
South Eastern Education and Library Board (Northern Ireland)
South Eastern Region Electricity Consumers' Committee
South of Scotland Region Electricity Consumers' Committee
South Wales Region Electricity Consumers' Committee
South West of England Regional Development Agency
South Western Region Electricity Consumers' Committee
Southern Education and Library Board (Northern Ireland)
Southern Health and Social Services Board (Northern Ireland)
Southern Health and Social Services Council (Northern Ireland)
Southern Region Electricity Consumers' Committee
Special Educational Needs and Disability Tribunal
Special Educational Needs Tribunal (SENT)
Special Health Authorities
Specialist Advisory Committee on Antimicrobial Resistance
Spoliation Advisory Panel
Spongiform Encephalopathy Advisory Committee
Sport England
Sports Council for Northern Ireland
Sports Council for Wales
Staff Commission for Education and Library Boards (Northern Ireland)
Staff Commission for Wales
Standards Board for England
Standing Advisory Commission on Human Rights (Northern Ireland)
Standing Advisory Committee on Industrial Property
Standing Advisory Committee on Trunk Road Assessment
Standing Committee on Postgraduate Medical and Dental Education
Standing Dental Advisory Committee
Standing Medical Advisory Committee
Standing Nursing and Midwifery Advisory Committee
Standing Pharmaceutical Advisory Committee
State Hospitals Board for Scotland
Statistics Advisory Committee (Northern Ireland)
Statistics Commission
Statute Law Committee for Northern Ireland
Steering Committee on Pharmacy Postgraduate Education
Stonebridge Housing Action Trust
Strategic Advisory Board for Intellectual Property (SABIP)
Strategic Investment Board
Strategic Rail Authority
Student Loans Company
Student Loans Company Ltd
Sugar Beet Research and Education Committee
Supported Employment Consultative Group
Supreme Court Rule Committee
Sustainable Development Commission
Sustainable Energy Policy Advisory Board
Tai Cymru
Tate
Tate Gallery
Teacher Training Agency
Teachers’ TV
Teachers’ TV Board of Governors
Teaching Company Scheme Board
Technical Advisory Board
Technical Advisory Board (for the Regulation of Investigatory Powers Act 2000)
Technology Strategy Board
Teesside Urban Development Corporation
Tenant Services Authority
The Accounts Commission for Scotland
The Great Britain-China Centre
The Historic Buildings and Monuments Commission for England (English Heritage)
The Independent Commission for Police Complaints for Northern Ireland
The New Millennium Experience Company Ltd
The NHS Pay Review Body
The Pensions Advisory Service
The Pensions Regulator
The Simpler Trade Procedures Board (SITPRO)
The Social Science Research Committee
Theatres Trust
Thurrock Development Corporation
Thurrock Thames Gateway Development Corporation
Tower Hamlets Housing Action Trust
Traffic Commissioners
Traffic Commissioners/Licensing Authorities
Traffic Director for London
Trafford Park Urban Development Corporation
Training and Development Agency for Schools
Training and Employment Agency (Advisory Board)
Transport Tribunal
Treasure Valuation Committee
Tribunal Procedure Committee
Tribunal Under Schedule 11 to the Health and Personal Social Services (NI) Order 1972
Trinity House
Trinity House Lighthouse Service
Tyne and Wear Urban Development Corporation
UK Advisory Panel for Health Care Workers Infected with Bloodborne Viruses
UK Atomic Energy Authority
UK CES
UK Chemical Weapons Convention National Authority Advisory Committee
UK Film Council
UK Sport
UK Sports Council
UK Xenotransplantation Interim Regulatory Authority
UKBA Complaints Audit Committee
Ulster Folk and Transport Museum
Ulster Museum
Ulster Sheltered Employment Ltd
Union Modernisation Fund Supervisory Board
United Kingdom Atomic Energy Authority
United Kingdom Eco-labelling Board (UKEB)
United Kingdom Register of Organic Food Standards
United Kingdom Transplant Support
Unrelated Live Transplant Regulatory Authority
Urban Development Corporations
Vaccine Damage Tribunals
Valuation Tribunal Service
Valuation Tribunals
VAT and Duties Tribunal
Veterinary Products Committee
Veterinary Residues Committee
Victim’s Advisory Panel
Victims Advisory Panel
Victoria and Albert Museum
Visit England
VisitBritain
Wales Tourist Board
Wallace Collection
Waltham forest Housing Action Trust
War Pensions Committees
Waste Electrical and Electronic Equipment Advisory Board
Water Appeals Commission (Northern Ireland)
Water Regulations Advisory Committee
Welsh Advisory Committee on Drug and Alcohol Misuse
Welsh Advisory Committee on Telecommunications
Welsh Committee for Postgraduate Pharmaceutical Education
Welsh Council for Postgraduate Medical and Dental Education
Welsh Dental Committee
Welsh Development Agency (WDA)
Welsh Health Common Services Authority (WHCSA)
Welsh Industrial Development Advisory Board
Welsh Language Board (WLB)
Welsh Medical Committee
Welsh National Board for Nursing, Midwifery and Health Visiting
Welsh Nursing and Midwifery Committee
Welsh Optical Committee
Welsh Pharmaceutical Committee
Welsh Scientific Advisory Committee
West Northamptonshire Development Corporation
West Northants Development Corporation
West of Scotland Water Authority
Western Education and Library Board (Northern Ireland)
Western Health and Social Services Board (Northern Ireland)
Western Health and Social Services Council (Northern Ireland)
Westminster Foundation for Democracy
Wider Health Working Group
Wilton Park Academic Council
Wilton Park Advisory Council
Wilton Park International Advisory Council
Wine Standards Board
Wine Standards Board of the Vintners' Company
Women’s National Commission
Women's National Commission
Womens’ National Commission
Working Ventures UK
Yorkshire Culture
Yorkshire forward
Yorkshire Region Electricity Consumers' Committee
Youth Council for Northern Ireland
Youth Justice Board for England and Wales
Zoos forum

FSA
Nirex
