# Supplementary material for: ScholarLens: extracting competences from research publications for the automatic generation of semantic user profiles
Source: PeerJ journal article supplement (doi:10.7717/peerj-cs.121), 2017-07-03
Supplement: Pipeline.zip [file Pipeline.zip › Pipeline/gate/plugins/ANNIE/resources/gazetteer/government/title-airforce.lst]

Leading Aircraftman  
Senior Aircraftman 
Senior Aircraftman (Technician) 
Junior Technician 
Corporal 
Sergeant 
Chief Technician 
Flight Sergeant 
Warrant Officer
RAF Sergeant Aircrew
RAF Flight Sergeant Aircrew
RAF Flight Sergeant Aircrew
RAF Master Aircrew 
Pilot Officer  
Flying Officer 
Flight Lieutenant 
Squadron Leader 
Wing Commander 
Group Captain 
Air Commodore 
Air Vice-Marshal 
Air Marshal 
Air Chief Marshal 
Marshal of the Royal Air Force
