# Supplementary material for: ScholarLens: extracting competences from research publications for the automatic generation of semantic user profiles
Source: PeerJ journal article supplement (doi:10.7717/peerj-cs.121), 2017-07-03
Supplement: Pipeline.zip [file Pipeline.zip › Pipeline/gate/plugins/ANNIE/resources/gazetteer/government/title-army.lst]

Officer Cadet
Second Lieutenant
Major
Lieutenant Colonel
Lance Corporal
Staff Sergeant
WO2 Company/Squadron Sergeant Major
WO1 Regimental Sergeant Major
Warrant Officer
Field Marshal
Marshal
General
Brigadier
Colonel
Lt. Colonel
Commandant
Captain
Lieutenant
2nd Lieutenant
Sergeant Major
Sergeant
Corporal
Private
