# Supplementary material for: ScholarLens: extracting competences from research publications for the automatic generation of semantic user profiles
Source: PeerJ journal article supplement (doi:10.7717/peerj-cs.121), 2017-07-03
Supplement: Pipeline.zip [file Pipeline.zip › Pipeline/gate/plugins/ANNIE/resources/gazetteer/government/title-navy.lst]

Admiral of the Fleet
Admiral 
Vice-Admiral
Rear Admiral
Commodore
Captain
Commander 
Lieutenant-Commander 
Lieutenant
Sub-Lieutenant 
Midshipman 
Royal Navy Ratings Badges Warrant Officer 1
Warrant Officer 1 
Warrant Officer 2
Chief Petty Officer
Petty Officer 
Leading Rate 

First Sea Lord
