# Supplementary material for: ScholarLens: extracting competences from research publications for the automatic generation of semantic user profiles
Source: PeerJ journal article supplement (doi:10.7717/peerj-cs.121), 2017-07-03
Supplement: Pipeline.zip [file Pipeline.zip › Pipeline/gate/plugins/ANNIE/resources/gazetteer/government/titles-other.lst]

His/Her Majesty
His/Her Royal Highness
His/Her Grace
The Most Honourable
The Right Honourable
The Honourable
The Much Honoured
The Most Reverend
The Right Reverend
The Very Reverend
The Reverend
The Venerable
HRH
HG
The Most Hon
The Most Honble
The Rt Hon
The Rt Honble
The Hon
The Honble
The Much Hon
The Much Hon'd
The Most Rev
The Most Revd
The Most Rev'd
The Rt Rev
The Rt Revd
The Rt Rev'd
The Very Rev
The Very Revd
The Very Rev'd
The Rev
Revd
The Rev'd
The Ven
The Venble
