# Supplementary material for: ScholarLens: extracting competences from research publications for the automatic generation of semantic user profiles
Source: PeerJ journal article supplement (doi:10.7717/peerj-cs.121), 2017-07-03
Supplement: Pipeline.zip [file Pipeline.zip › Pipeline/gate/plugins/ANNIE/resources/gazetteer/government/wars.lst]

World War One
World War Two
World War I
World War II
First World War
Second World War
Korean War
Vietnam War
Portuguese Colonial Wars
Sino-Indian War
Indo-Pakistani War of 1965
South African Border War
Six-Day War
War of Attrition
Indo-Pakistani War
6th October War - Yom Kippur War
Turkish invasion of Cyprus
Soviet war in Afghanistan
Iran–Iraq War
First Lebanon War
Falklands Conflict
Falklands War
Palestinian Intifada
Nagorno-Karabakh War
Somali Civil War
Gulf War
1991–1992 South Ossetia War
Yugoslav Wars
War in Abkhazia
Rwandan Civil War
First Chechen War
First Congo War
Kosovo War
Second Congo War
Kargil War
Second Chechen War
Al-Aqsa Intifada
War in Afghanistan (2001–present)
Invasion of Iraq leading to the Iraq War
Second Lebanon War
Mexican Drug War
2008 South Ossetia War
2008 Turkish incursion into northern Iraq
Gaza War
