# Supplementary material for: ScholarLens: extracting competences from research publications for the automatic generation of semantic user profiles
Source: PeerJ journal article supplement (doi:10.7717/peerj-cs.121), 2017-07-03
Supplement: Pipeline.zip [file Pipeline.zip › Pipeline/gate/plugins/ANNIE/resources/gazetteer/ident_prekey.lst]

id
id
i.d.
ID
I.D.
ref
Ref
REF
reference
reference no
reference no
Reference No
Reference no
