# Supplementary material for: ScholarLens: extracting competences from research publications for the automatic generation of semantic user profiles
Source: PeerJ journal article supplement (doi:10.7717/peerj-cs.121), 2017-07-03
Supplement: Pipeline.zip [file Pipeline.zip › Pipeline/gate/plugins/ANNIE/resources/gazetteer/lists.def]

adbc.lst:adbc
agency.lst:organization:government
airports.lst:location:airport
cabinet_ministers.lst:person_full:government
cdg.lst:cdg
charities.lst:organization:charity
city.lst:location:city
city_cap.lst:location:city
city_lower.lst:location:city
city_uk.lst:location:city
company.lst:organization:company
company_ambig.lst:organization:company
company_cap.lst:organization:company
country.lst:location:country
country_abbrev.lst:location:country_abbrev
country_adj.lst:country_adj:COUNTRYADJ
country_cap.lst:location:country
country_code.lst:country_code
country_lower.lst:location:country
currency_prefix.lst:currency_unit:pre_amount
currency_unit.lst:currency_unit:post_amount
date_key.lst:date_key
date_other.lst:date_key:other
date_unit.lst:date_unit
day.lst:date:day
day_cap.lst:date:day
department.lst:organization:government
facility.lst:facility:building
facility_key.lst:facility_key
facility_key_ext.lst:facility_key_ext
festival.lst:date:festival
foreign_ministers.lst:person_full:government
govern_key.lst:govern_key
government.lst:organization:government
greeting.lst:greeting
hour.lst:time:hour
ident_prekey.lst:ident_key:pre
jobtitles.lst:jobtitle
loc_generalkey.lst:loc_general_key
loc_key.lst:loc_key:post
loc_other.lst:location:other
loc_prekey.lst:loc_key:pre
loc_prekey_lower.lst:loc_key:pre
ministry.lst:organization:government
months.lst:date:month
more_company.lst:organization:company
mountain.lst:location:region
newspapers.lst:organization:newspaper
number_fold.lst:number_fold
numbers.lst:number
ordinal.lst:date:ordinal
org_base.lst:org_base
org_key.lst:org_key
org_key_cap.lst:org_key:cap
org_pre.lst:org_pre
org_spur.lst:spur
organization.lst:organization:other
percent.lst:percent
person_ending.lst:person_ending
person_female.lst:person_first:female
person_female_ambig.lst:person_first:female
person_female_cap.lst :person_first:female
person_female_lower.lst:person_first:female
person_full.lst:person_full
person_male.lst:person_first:male
person_male_ambig.lst:person_first:male
person_male_cap.lst:person_first:male
person_male_lower.lst:person_first:male
person_sci.lst:person_full:sci
person_spur.lst:spur
phone_prefix.lst:phone_prefix
province.lst:location:province
racecourse.lst:location:racecourse
radio_stations_uk.lst:organization
region.lst:location:region
region_cap.lst:location:region
region_uk.lst:location:region
say.lst:say
sports.lst:sport
spur_ident.lst:spur_ident
state_us.lst:state:abbreviation
state_us_ambig.lst:state:abbreviation
stop.lst:stop
surname_prefix.lst:surname:prefix
team.lst:organization:team
time.lst:time:absolute
time_ampm.lst:time:ampm
time_modifier.lst:time_modifier
time_unit.lst:time_unit
timeofday.lst:timeofday
timezone.lst:time:zone
title.lst:title:civilian
title_female.lst:title:female
title_male.lst:title:male
title_mil.lst:title:military
title_pol.lst:title:police
tvcompany.lst:organization:company
university_uk.lst:organization:university
url_key.lst:url_key
water.lst:location:region
year.lst:year
city_uk_ambig.lst:location:city
newspaper_ending.lst:newspaper_ending:newspaper
political_party.lst:organization:political
abbreviations.lst:stop
person_male_lower_ambig.lst:person_first:male
person_female_lower_ambig.lst:person_first:female
person_celebrity_surname.lst:person_full
city_abbreviation.lst:location:city
mlb-teams.lst:organization:team
nba-teams.lst:organization:team
nfl-teams.lst:organization:team
company_lower.lst:organization:company
companies_uk_lower.lst:organization:company
music-artists.lst:person_full:music
religious_adj.lst:religious_adj
