# Supplementary material for: ScholarLens: extracting competences from research publications for the automatic generation of semantic user profiles
Source: PeerJ journal article supplement (doi:10.7717/peerj-cs.121), 2017-07-03
Supplement: Pipeline.zip [file Pipeline.zip › Pipeline/gate/plugins/ANNIE/resources/gazetteer/ministry.lst]

Trade and Industry Ministry
Ministry of Radio
Ministry of Posts and Telecommunications
Ministry of Posts and Telecommunication
Ministry of Oil Refining and Petrochemical 
Ministry of Oil Industry
Ministry of Oil
Ministry of Mineral Fertilizers
Ministry of International Trade and Industry
Ministry of Geology
Ministry of Foreign Economic Relations
Ministry of Finance
Ministry of Electronics Industry
Ministry of Defense
Foreign Ministry
Finance Ministry
