# Supplementary material for: ScholarLens: extracting competences from research publications for the automatic generation of semantic user profiles
Source: PeerJ journal article supplement (doi:10.7717/peerj-cs.121), 2017-07-03
Supplement: Pipeline.zip [file Pipeline.zip › Pipeline/gate/plugins/ANNIE/resources/gazetteer/mlb-teams.lst]

Washington Nationals
Toronto Blue Jays
Texas Rangers
Tampa Bay Rays
St. Louis Cardinals
Seattle Mariners
San Francisco Giants
San Diego Padres
Pittsburgh Pirates
Philadelphia Phillies
Oakland Athletics
New York Yankees
New York Mets
Minnesota Twins
Milwaukee Brewers
Miami Marlins
Los Angeles Dodgers
Los Angeles Angels of Anaheim
Kansas City Royals
Houston Astros
Detroit Tigers
Colorado Rockies
Cleveland Indians
Cincinnati Reds
Chicago White Sox
Chicago Cubs
Boston Red Sox
Baltimore Orioles
Atlanta Braves
Arizona Diamondbacks
Diamondbacks
Braves
Orioles
White Sox
Astros
Royals
Dodgers
Marlins
Brewers
Mets
Yankees
Phillies
Padres
Giants
Mariners
Cardinals
Blue Jays
