# Supplementary material for: ScholarLens: extracting competences from research publications for the automatic generation of semantic user profiles
Source: PeerJ journal article supplement (doi:10.7717/peerj-cs.121), 2017-07-03
Supplement: Pipeline.zip [file Pipeline.zip › Pipeline/gate/plugins/ANNIE/resources/gazetteer/months.lst]

APR
APR.
APRIL
AUG
AUG.
AUGUST
AUTUMN
Apr
Apr.
April
Aug
Aug.
August
Autumn
DEC
DEC.
DECEMBER
Dec
Dec.
December
FEB
FEB.
FEBRUARY
Feb
Feb.
February
JAN
JAN.
JANUARY
JUL
JUL.
JULY
JUN
JUN.
JUNE
Jan
Jan.
January
Jul
Jul.
July
Jun
Jun.
June
MAR
MAR.
MARCH
MAY
Mar
Mar.
March
May
NOV
NOV.
NOVEMBER
Nov
Nov.
November
OCT
OCT.
OCTOBER
Oct
Oct.
October
SEP
SEP.
SEPT
SEPT.
SEPTEMBER
Sep
Sep.
Sept
Sept.
September
Summer
Winter
