# Supplementary material for: ScholarLens: extracting competences from research publications for the automatic generation of semantic user profiles
Source: PeerJ journal article supplement (doi:10.7717/peerj-cs.121), 2017-07-03
Supplement: Pipeline.zip [file Pipeline.zip › Pipeline/gate/plugins/ANNIE/resources/gazetteer/more_company.lst]

ICBC
China Construction Bank
JPMorgan Chase
General Electric
Exxon Mobil
HSBC Holdings
Royal Dutch Shell
Agricultural Bank of China
Berkshire Hathaway
PetroChina
Bank of China
Wells Fargo
Chevron
Volkswagen Group
Apple
Wal-Mart Stores
Gazprom
BP
Citigroup
Petrobras
Samsung Electronics
BNP Paribas
Total
AT&T
Allianz
Sinopec-China Petroleum
Mitsubishi UFJ Financial
Bank of America
China Mobile
ENI
Toyota Motor
Nestlé
Vodafone
IBM
Procter & Gamble
Daimler
Pfizer
Statoil
AXA Group
Commonwealth Bank
Microsoft
Itaú Unibanco Holding
Banco Santander
BHP Billiton
Banco Bradesco
Nippon Telegraph & Tel
Johnson & Johnson
Westpac Banking Group
Goldman Sachs Group
Royal Bank of Canada
Siemens
Sumitomo Mitsui Financial
Ford Motor
Bank of Communications
BMW Group
Comcast
Novartis
National Australia Bank
Rosneft
ING Group
Sberbank
American International Group
Telefónica
Lukoil
Prudential
ANZ
Banco do Brasil
Google
BASF
General Motors
TD Bank Group
Sanofi
ConocoPhillips
EDF
Zurich Insurance Group
Anheuser-Busch InBev
Intel
Mizuho Financial
Coca-Cola
Cisco Systems
Munich Re
Merck & Co
Ping An Insurance Group
Bank of Nova Scotia
Nissan Motor
Honda Motor
Vale
PepsiCo
Hyundai Motor
UnitedHealth Group
BBVA-Banco Bilbao Vizcaya
United Technologies
Roche Holding
Saudi Basic Industries
GDF Suez
Boeing
Caterpillar
Standard Chartered
E.ON
América Móvil
Wal-Mart Stores
China National Petroleum
State Grid
U.S. Postal Service
Sinopec
China Telecommunications
Carrefour
Hon Hai Precision Industry
Gazprom
Deutsche Post
Agricultural Bank of China
United Parcel Service
Siemens
Hitachi
McDonald's
International Business Machines
Compass Group
Industrial & Commercial Bank of China
Aviation Industry Corp. of China
Volkswagen
Tesco
Sodexo
Target
HSBC Holdings
Kroger
Citigroup
Sears Holdings
General Electric
Hewlett-Packard
Toyota Motor
ArcelorMittal
AT&T
China Construction Bank
Veolia Environnement
La Poste
Panasonic
Nestle
Robert Bosch
Wells Fargo
Daimler
China Railway Group
Home Depot
Edeka Zentrale
Sberbank
China Southern Power Grid
Telefonica
Metro
FedEx
Jardine Matheson
Bank of China
BN-Amro
Accenture
Accor
Activision Blizzard
Aditya Birla Group
Advanced Micro Devices
Affiliated Computer Services
Airbus
Air France-KLM
Aitken Spence
Akzo Nobel
Alcatel-Lucent
Allianz
Alstom
Altria Group
American International Group
Arcor
Asian Paints
Assicurazioni Generali
Atari
Activision
AXA
Bacardi
Banco Santander
Bank of Montreal
Barrick Gold Corporation
Barilla Group
BASF
Baskin-Robbins
Bayer
BBVA
Bic
BIDV
Billabong
Black & Decker
BMW
BNP Paribas
Boeing
Bombardier Inc.
Bouygues
Bridgestone
BP (British Petroleum)
Cadbury Schweppes
Canon Inc
Capital One
Caterpillar Inc.
Celestica
Chevron
Cisco Systems
Citigroup
CMC[disambiguation needed]
Cognizant Technology Solutions
ConocoPhillips
Coca-Cola
Costco
Creative Labs
Credit Suisse
Crédit Agricole
Cummins
Dabur
Daimler AG
Danone
Dell
Delta Airlines
Deutsche Bank
Deutsche Telekom
DHL
Dow Chemical
Dunkin' Donuts
EDF
Electronic Arts
Electronic Data Systems
Electrolux
Emerson Electric
Eni
Enel
Embraer
Epson
Ericsson
Ernst & Young
Etisalat
ExxonMobil
Faber-Castell
Facebook
FedEx Express
France Télécom
Ferrero
Fiat
Ficosa
Finmeccanica
Ford Motor Company
FPT Group
Gazprom
General Electric
General Motors
Generali
Gerdau
Gillette
Glaxo Smith Kline
Goodyear Tire and Rubber Company
Google
Halliburton
Hearst Corporation
Heineken
Hewlett-Packard
Hilti
Hindustan Computers Limited
Hitachi, Ltd.
Honda
Honeywell
HSBC
Huawei
Hutchison Whampoa Limited
Hyundai Motor Company
IBM
ICICI
IKEA
Indesit
Infosys
Ingersoll Rand
ING Group
Intel Corporation
Intesa Sanpaolo
Isuzu
Jardine Matheson
Johnson & Johnson
JPMorgan Chase & Co.
Kenya Airways
Kingston Technology
Knorr (brand)
Konami
KPMG
Krispy Kreme
Lagardère
Lactalis
Lear
Leoni AG
Lenovo
Lexmark
LG
LiuGong
Lockheed Martin
L'Oréal
Lukoil
Luxottica
McDonald's
Maggi
Marriott
Martini & Rossi
Masterfoods
Mattel
Mercedes-AMG
Mercedes-Benz
Michelin
Microsoft
Mobil
Motorola
Millipore Corporation
Monsanto Company
Namco Bandai Games
Namco Bandai Holdings
Nestlé
NetApp Inc.
News Corporation
Nike, Inc.
Nintendo
Nissan
Novartis
Oracle Corporation
Panasonic Corporation
Parmalat
Pepper Lunch
PepsiCo
Petronas
Petrovietnam
Pfizer
Philips
Procter & Gamble
Proton (carmaker)
PSA Peugeot Citroën
Ranbaxy
Red Bull
Regus
Renault
Repsol
RICOH
Rockstar Energy
Robert Bosch GmbH
Rohde & Schwarz
Royal Dutch Shell
Royal Bank of Canada
Rusal
SABMiller plc
Samsung Electronics
SanDisk
Sanofi Aventis
SAP AG
Sapient Corporation
SAS
Sasken Communication Technologies Limited
Sasol
Schlumberger
Scotiabank
Sega Sammy Holdings
Servcorp
Siemens
Schneider Electric
Société Générale
Sony
Sony Computer Entertainment
Sony Music Entertainment
Sony Pictures Entertainment
Southwest Airlines
Square Enix
Starbucks
Tata Motors
TCS
Telefonica
Tejas Networks
Thomson Reuters
Total S.A.
Toyota
TRW Automotive
Unilever
United Airlines
Viettel Mobile
VNPT
Vimpelcom
Vodafone
Wal-Mart
Wipro
Aaron's, Inc.
A & W Restaurants
AAMCO Transmissions
Aco Hardware
AdvantaClean
Advantage Rent a Car
Aire Serv
Allstate
AlphaGraphics
American Poolplayers Association
AmeriHost
Amato's
Ampm
Applebee's
Arby's
Asia-Backpackers
Assist-2-Sell
Athletic Nation
Atlanta Bread Company
Auntie Anne's
Avis Rent A Car
Bata
Baker's Dozen Donuts
Baskin-Robbins
Batteries +
Baymont Inn & Suites
Beef `O'Brady's
Ben & Jerry's
Ben Franklin Stores
Berlitz Language Schools
Big Apple Bagels
Big Boy Restaurants International
Big O Tires
Blackjack Pizza
Blake's Lotaburger
Blockbuster Video
Bojangles' Famous Chicken 'n Biscuits
Booster Juice
Boston Market
Boston Pizza
Bruegger's
Buffalo Wild Wings
Borders Group
Burger King
Camille's Sidewalk Cafe
Candy Bouquet
Captain D's Seafood
Carl's Jr.
Carlson Wagonlit Travel
Cartridge World
Carvel
Century 21 Real Estate
Cefiore
Charley's Grilled Subs
Checkers Drive-In Restaurants
Chem-Dry
Chester's International
Chick Fil-A
Choice Hotels International
Church's Chicken
Circle K
CiCi's Pizza
Coffee Beanery
Coffee News
Cold Stone Creamery
Coldwell Banker Real Estate Corporation
College Hunks Hauling Junk
College Hunks Moving
Cookies By Design
Cousins Subs
Culligan Water Conditioning
Culver Franchising System
Cuppy's Coffee
Curves for Women
Curves International
Dairy Queen
D'Angelo Sandwich Shops
Days Inns Worldwide
Del Taco
Denny's
Dickey's Barbecue Pit
Dippin' Dots Franchising
Direct Buy
Discount Tire Company
Dog n Suds
Domino's Pizza
Doubletree Hotels, Suites, Resorts
Dream Dinners
Dulce Cafe
Dunkin' Donuts
Econo Lodge
Edible Arrangements
El Pollo Loco
EB Games
Embassy Suites Hotels
EmbroidMe
ERA Real Estate
Eximius Mobile Services
Extreme Pizza
Express Mobile Services
EduWings
FamilyMart
Famous Dave's
Fantastic Sams
Farmer Boys
Firehouse Subs
Fox's Pizza Den
Freedom Boat Club
Fressnapf
Friendly's Restaurants
Fuddruckers
Furniture Medic
GNC Franchising
Golden Corral
Gold's Gym
Great Clips
Gymboree
Game stop
Häagen-Dazs
Hampton Inn/Hampton Inn & Suites
Hardee's
Hard Rock Cafe
Harvey's
Hawthorn Suites
Hilton Garden Inn
Hilton Hotels & Resorts
HobbyTown USA
HomeVestors of America
Homewood Suites by Hilton
Hooters
Howard Johnson International
Hungry Howie's Pizza & Subs
IHOP
Instant Tax Service
InterContinental Hotels Group
It's a Grind Coffee House
Jack in the Box
Jackson Hewitt Tax Service
Jamba Juice
Jani-King
Jazzercise
Jenny Craig
Jerry's Subs & Pizza
Jersey Mike's Subs
Jiffy Lube
Jimmy John's Gourmet Sandwich Shops
Johnny Rockets
Kampgrounds of America
Kentucky Fried Chicken
Knights Inn
Krystal Restaurants
Kids Academy Nurseries
L'Occitane en Provence
L.A. Insurance
La Quinta Inns & Suites
Lenny's Sub Shop
Liberty Tax Service
Little Caesars
Little Gym
Long John Silver's Restaurants
Maaco Auto Painting & Bodyworks
Mac's Milk
Mad Science
MaggieMoo's International
Maid Brigade
Maid-Rite
Manchu Wok
Marble Slab Creamery
Martinizing Dry Cleaning
Matco Tools
McAlister's Deli
McDonald's
Meineke Car Care Center
Merry Maids
Microtel
Midas Muffler
Milio's Sandwiches
Moe's Southwest Grill
Motel 6
Mr. Appliance
Mr. Electric
Mr. Rooter
Mr. Sub
Navis Pack & Ship Centers
National Property Inspections
Netspace
NightOwl Convenience Stores
Nandos
Orange Julius
Outback Steakhouse
Office 1 Superstore
Pacha
Palliadium Boots
Panda Express
Panera Bread/Saint Louis Bread Company
Papa Johns
Papa Murphy's
Party America
Paychex
Payless Car Rental
Pearle Vision
Perkins Restaurant and Bakery
Pet Supplies Plus
Pick Up Stix
Pita Pit
Pizza Fusion
Pizza Hut
Pizza Inn
Pizza Nova
Pizza Pizza
Pizza Ranch
Planet Fitness
Play N Trade
Play It Again Sports
Pop-A-Lock
Popeyes Chicken & Biscuits
Qdoba Mexican Grill
Quizno's
Radisson Hotels & Resorts Worldwide
Ralph Lauren Asia
Ramada Worldwide
RE/MAX
Red Lobster
Red Mango
Red Roof Inns
Rent-A-Center
Rent-A-Wreck
Revive Franchising
Rita's Water Ice
Rocky Mountain Chocolate Factory
Rubio's Fresh Mexican Grill
Ruby Tuesday
Samurai Sam's Teriyaki Grill
Sam & Louie's
Saladworks
Save-A-Lot
Sbarro
Schlotzsky's
Sears Appliance Dealer
Second Cup
ServiceMaster Clean
Shake's Frozen Custard
Shakey's Pizza
Slumberland Furniture
Smoothie King
Snap Fitness
Snap-on Tools
Snappy Snaps
Sonic Drive In Restaurants
Souper Salad
Spherion
Sports Clips
Stanley Steemer Carpet Cleaner
Steak Escape
Steak n Shake
Studio 6
Subway (restaurant)
Super 8 Worldwide
Supercuts
Sweet Frog
Swensen's
Swiss Chalet
Sylvan Learning Centers
Taco Bell Corporation
Taco Del Mar
Taco John's
TCBY
TGI Fridays
The Athlete's Foot
Tim Hortons
Travelodge Hotels
Tropical Smoothie Cafe
Truly Nolen
Tudor's Biscuit World
Two Maids & A Mop
Two Men and a Truck International
UBuildIt
U-Haul
Uno Chicago Grill
UPS Store
Valvoline Instant Oil Change
Village Inn
Volvo Rents
Value Place
Waffle House
Wendy's
Western Union
Wetzel's Pretzels
Wild Birds Unlimited
Whataburger
Wienerschnitzel
Wing Zone
Wingstop Restaurants
Woody's Chicago Style
Yogen Früz
Ziebart
