# Supplementary material for: ScholarLens: extracting competences from research publications for the automatic generation of semantic user profiles
Source: PeerJ journal article supplement (doi:10.7717/peerj-cs.121), 2017-07-03
Supplement: Pipeline.zip [file Pipeline.zip › Pipeline/gate/plugins/ANNIE/resources/gazetteer/mountain.lst]

Alps
Andes
Himalayas
Pyrenees
Snowdonia
Sierra Nevada
Rocky Mountains
Great Dividing Range
Transantarctic Mountains
Ural Mountains
Atlas Mountains
Appalachian Mountains
Altai Mountains
Carpathian Mountains
Kjølen
Barisan Mountains
Coast Mountains
Qin Mountains
Western Ghats
Serra do Mar
Zagros Mountains
Sierra Madre Occidental
Mantiqueira Mountains
Espinhaço Mountains
Apennines
Drakensberg
Cascade Mountains
Brooks Range
U.S. Interior Highlands
Aravalli Range
