# Supplementary material for: ScholarLens: extracting competences from research publications for the automatic generation of semantic user profiles
Source: PeerJ journal article supplement (doi:10.7717/peerj-cs.121), 2017-07-03
Supplement: Pipeline.zip [file Pipeline.zip › Pipeline/gate/plugins/ANNIE/resources/gazetteer/music-artists.lst]

Elvis Presley
Michael Jackson
Madonna
Elton John
Led Zeppelin
Mariah Carey
Celine Dion
Whitney Houston
Garth Brooks
Rihanna
Billy Joel
Bruce Springsteen
Barbra Streisand
Phil Collins
Frank Sinatra
Neil Diamond
Julio Iglesias
Taylor Swift
Britney Spears
Rod Stewart
Bon Jovi
George Strait
Prince
Kenny Rogers
Paul McCartney
Janet Jackson
Bob Dylan
George Michael
Bryan Adams
Cher
Lionel Richie
Olivia Newton-John
Stevie Wonder
Linda Ronstadt
Tina Turner
Donna Summer
Johnny Hallyday
Barry White
Katy Perry
Shania Twain
Kanye West
Van Halen
Lady Gaga
Gloria Estefan
Van Halen
Reba McEntire
Meat Loaf
Barry Manilow
Tom Petty
Jay-Z
Beyoncé
Kenny G
Enya
Tupac Shakur
Andrea Bocelli
Bob Marley
Aretha Franklin
