# Supplementary material for: ScholarLens: extracting competences from research publications for the automatic generation of semantic user profiles
Source: PeerJ journal article supplement (doi:10.7717/peerj-cs.121), 2017-07-03
Supplement: Pipeline.zip [file Pipeline.zip › Pipeline/gate/plugins/ANNIE/resources/gazetteer/nba-teams.lst]

Boston Celtics
Brooklyn Nets
New York Knicks
Philadelphia 76ers
Toronto Raptors
Chicago Bulls
Cleveland Cavaliers
Detroit Pistons
Indiana Pacers
Milwaukee Bucks
Atlanta Hawks
Charlotte Hornets
Miami Heat
Orlando Magic
Washington Wizards
Dallas Mavericks
Houston Rockets
Memphis Grizzlies
New Orleans Pelicans
San Antonio Spurs
Denver Nuggets
Minnesota Timberwolves
Portland Trail Blazers
Oklahoma City Thunder
Utah Jazz
Golden State Warriors
Los Angeles Clippers
Los Angeles Lakers
Phoenix Suns
Sacramento Kings
76ers
Knicks
Mavericks
Lakers
Celtics
