# Supplementary material for: ScholarLens: extracting competences from research publications for the automatic generation of semantic user profiles
Source: PeerJ journal article supplement (doi:10.7717/peerj-cs.121), 2017-07-03
Supplement: Pipeline.zip [file Pipeline.zip › Pipeline/gate/plugins/ANNIE/resources/gazetteer/newspapers.lst]

Independent on Sunday
Independent Digital
Investor's Daily
New York Daily News
New York Post
New York Times
New York Times News Service
New York Times Special Features
New York Times Syndicate
Newsweek
Readers Digest
The Boston Globe
The Financial Times
The Finanical Times Limited
The Independent
The Independent on Sunday
The Phoenix Gazette
Washington Post
the Sun
Wall Street Journal
WSJ
The Times
Daily Mail
The Mail on Sunday
The Guardian
Daily Telegraph
FT
De Standard
Jerusalem Post
the Times
IHT
WP
Daily Star
Le Matin
Hong Kong Standard
China Daily
Der Spiegel
LA PRESSE
LE TEMPS
Le Temps
