# Supplementary material for: ScholarLens: extracting competences from research publications for the automatic generation of semantic user profiles
Source: PeerJ journal article supplement (doi:10.7717/peerj-cs.121), 2017-07-03
Supplement: Pipeline.zip [file Pipeline.zip › Pipeline/gate/plugins/ANNIE/resources/gazetteer/nfl-teams.lst]

Buffalo Bills
Miami Dolphins
New England Patriots
New York Jets
Baltimore Ravens
Cincinnati Bengals
Cleveland Browns
Pittsburgh Steelers
Houston Texans
Indianapolis Colts
Jacksonville Jaguars
Tennessee Titans
Denver Broncos
Kansas City Chiefs
Oakland Raiders
San Diego Chargers
Dallas Cowboys
New York Giants
Philadelphia Eagles
Washington Redskins
Chicago Bears
Detroit Lions
Green Bay Packers
Minnesota Vikings
Atlanta Falcons
Carolina Panthers
New Orleans Saints
Tampa Bay Buccaneers
Arizona Cardinals
St. Louis Rams
San Francisco 49ers
Seattle Seahawks
