# Supplementary material for: ScholarLens: extracting competences from research publications for the automatic generation of semantic user profiles
Source: PeerJ journal article supplement (doi:10.7717/peerj-cs.121), 2017-07-03
Supplement: Pipeline.zip [file Pipeline.zip › Pipeline/gate/plugins/ANNIE/resources/gazetteer/numbers.lst]

zero
one
One
two
Two
three
Three
four
Four
five
Five
six
Six
seven
Seven
eight
Eight
nine
Nine
ten
Ten
eleven
Eleven
twelve
Twelve
thirteen
Thirteen
fourteen
Fourteen
fifteen
Fifteen
sixteen
Sixteen
seventeen
Seventeen
eighteen
Eighteen
nineteen
Nineteen
twenty
twenty-one
twenty-two
twenty-three
twenty-four
twenty-five
twenty-six
twenty-seven
twenty-eight
twenty-nine
Twenty
thirty
thirty-one
thirty-two
thirty-three
thirty-four
thirty-five
thirty-six
thirty-seven
thirty-eight
thirty-nine
Thirty
forty
forty-one
forty-two
forty-three
forty-four
forty-five
forty-six
forty-seven
forty-eight
forty-nine
Forty
fifty
fifty-one
fifty-two
fifty-three
fifty-four
fifty-five
fifty-six
fifty-seven
fifty-eight
fifty-nine
Fifty
sixty
sixty-one
sixty-two
sixty-three
sixty-four
sixty-five
sixty-six
sixty-seven
sixty-eight
sixty-nine
Sixty
seventy
seventy-one
seventy-two
seventy-three
seventy-four
seventy-five
seventy-six
seventy-seven
seventy-eight
seventy-nine
Seventy
eighty
eighty-one
eighty-two
eighty-three
eighty-four
eighty-five
eighty-six
eighty-seven
eighty-eight
eighty-nine
Eighty
ninety
ninety-one
ninety-two
ninety-three
ninety-four
ninety-five
ninety-six
ninety-seven
ninety-eight
ninety-nine
Ninety
hundred
thousand
million
billion
