# Supplementary material for: ScholarLens: extracting competences from research publications for the automatic generation of semantic user profiles
Source: PeerJ journal article supplement (doi:10.7717/peerj-cs.121), 2017-07-03
Supplement: Pipeline.zip [file Pipeline.zip › Pipeline/gate/plugins/ANNIE/resources/gazetteer/ordinal.lst]

zeroth
first
second
third
fourth
fifth
fift
sixth
seventh
eighth
ninth
nineth
tenth
eleventh
twelfth
twelveth
twelvth
dozenth
thirteenth
fourteenth
fifteenth
sixteenth
seventeenth
eighteenth
nineteenth
ninteenth
twentieth
twenty-first
twenty-second
twenty-third
twenty-fourth
twenty-fifth
twenty-sixth
twenty-seventh
twenty-eighth
twenty-ninth
twenty first
twenty second
twenty third
twenty fourth
twenty fifth
twenty sixth
twenty seventh
twenty eighth
twenty ninth
thirtieth
thirty-first
thirty first
fortieth
fiftieth
sixtieth
seventieth
eightieth
ninetieth
hundredth
five-hundredth
thousandth
millionth
billionth
trillionth
quadrillionth
quintillionth
sextillionth
septillionth
octillionth
nonillionth
decillionth
undecillion
duodecillionth
duotrigintillionth
vigintillionth
googolth
googolplexth
gazillionth
