# Supplementary material for: ScholarLens: extracting competences from research publications for the automatic generation of semantic user profiles
Source: PeerJ journal article supplement (doi:10.7717/peerj-cs.121), 2017-07-03
Supplement: Pipeline.zip [file Pipeline.zip › Pipeline/gate/plugins/ANNIE/resources/gazetteer/org_base.lst]

ADMINISTRATION
AGENCE
AGENCES
AGENCIES
AGENCY
ASSOCIATION
AUTHORITY
AUTORITE
Administration
Agence
Agences
Agency
Association
Assoc.
Assoc
Authority
Autorité
BANK
BANQUE
BOARD
BROTHERHOOD
BUREAU
Bank
Banque
Board
Brotherhood
Building Society
Bureau
CAISSE
CATHEDRAL
CENTER
CENTRE
CHURCH
CLINIC
CLINIQUE
COLLEGE
COMMISSION
COMMITTEE
COMMUNITY
CONSEIL
CORPORATION
COUNCIL
Caisse
Cathedral
Center
Centre
Choir
Church
Clinic
Clinique
Club
College
Collège
Commission
Committee
Community
Confederation
Conseil
Corporation
Council
Crew
DEPARTEMENT
DEPARTMENT
DIRECTORATE
DIVISION
Department
Directorate
Département
EGLISE
ESTATE
ETAT
Eglise
Ensemble
Estate
Etat
FEDERATION
FOUNDATION
FUND
Federation
Foundation
Fund
Fédération
GROUP
GROUPE
GUILD
Group
Groupe
Guild
HEALTH AUTHORITY
HOSPITAL
HOTEL
HOTELS
Health Authority
Hospital
Hotel
Hotels
INSTITUT
INSTITUTE
INSTITUTES
Institut
Institute
Institutes
LABORATOIRE
LABORATOIRES
LABORATORIES
LABORATORY
LOCAL AUTHORITY
LOCAL HEALTH AUTHORITY
Laboratoire
Laboratoires
Laboratories
Laboratory
Local Authority
Local Health Authority
MAGAZINE
MINISTERE
MINISTRY
MUSEE
MUSEUM
Magazine
Ministry
Ministère
Museum
Musèe
OBSERVATOIRE
OBSERVATORY
OFFICE
Observatoire
Observatory
Office
Orchestra
PARTENAIRES
PARTENARIAT
PARTNERS
PARTNERSHIP
PARTY
PLANT
Partenaires
Partenariat
Partners
Partnership
Party
Plant
Polytechnic
Quartet
REGIONAL AUTHORITY
REGIONAL HEALTH AUTHORITY
Regional Authority
Regional Health Authority
SCHOOL
SERVICE
SOCIETY
SQUADRON
STATE UNIVERSITY
SUBCOMMITTEE
School
Service
Social Club
Societe
Society
Société
Squadron
State University
Subcommittee
Syndicat
Tribunal
TRUST
Trust
UNION
UNIVERSITY
USINE
Union
University
Université
Usine
WORKERS
Ware
Workers
clinique
federation
ministère
state university
syndicat
université
état
department
departments
Comprehensive
