# Supplementary material for: ScholarLens: extracting competences from research publications for the automatic generation of semantic user profiles
Source: PeerJ journal article supplement (doi:10.7717/peerj-cs.121), 2017-07-03
Supplement: Pipeline.zip [file Pipeline.zip › Pipeline/gate/plugins/ANNIE/resources/gazetteer/org_ending.lst]

A. en P.
AB
A.C.
ACE
AD
a.d.
AE
AFC
A.F.C.
AG
A/L
AmbA
ANS
Apb
ApS
ApS & Co.
A/S
A.S.
ASA
AVV
Bpk
Bt
B.V.
BVBA
CA
C.V.
CVA
CVoA
DA
d/b/a
d.d
d.n.o.
d.o.o.
EE
EEG
EIRL
ELP
EPE
EURL
e.V.
FC
F.C.
GbR
GCV
GesmbH
GIE
GmbH & Co. KG
GmbH
HB
hf
IBC
INC
Inc
I/S
KA/S
Kb
KD
k.d.
KDA
k.d.d.
Kft
KG
KGaA
KK
Kkt
Kol. SrK
Kom. SrK
k.s.
K/S
Kv
Ky
lda
LDC
LLC
LLP
Ltd
Ltda
N.A>
NT
NV
ocD
OE
OHG
OU **
Oy
OYJ
P/L
PC Ltd
PLC
PMA
PMDN
PrC
Prp. Ltd.
PT
Pty.
plc
RAS
RFC
R.F.C.
Rt
S. de R.L.
S. en C.
S. en N.C.
S/A
SA
sa
SA de CV
SAFI
S.A.I.C.A.
SAL
SApA
Sarl
SAS
SC
S.C.
SCA
SCP
SCS
S.C.S.
Sdn Bhd
SENC
SGPS
SK
SNC
SOPARFI
sp
SpA
spols.r.o.
SPRL
Sp.z.o.o.
Srl
td
TLS
VEB
VOF
v.o.s.
