# Supplementary material for: ScholarLens: extracting competences from research publications for the automatic generation of semantic user profiles
Source: PeerJ journal article supplement (doi:10.7717/peerj-cs.121), 2017-07-03
Supplement: Pipeline.zip [file Pipeline.zip › Pipeline/gate/plugins/ANNIE/resources/gazetteer/org_key.lst]

ASSOCIATES
Acquisition
Affaires
Affairs
Aircraft
Airlines
Airways
Associates
Assurance
Aviation
Bancorp
Boat Company
Boats
Brands
Brewery
Capital
Care
Chemicals
Chronicle
Circus
Coalition
Committee
Communications
Computer
Consulting
Containers
Corps
Department Store
Design
Drew
Drilling
Education
Electric
Electricity
Electriques
Energie
Engines
Enterprise
Enterprises
Equitable
Federal
Financial
Fire Rescue
Fédéral
Gas
Gestion
Général
Générale
Holdings
Industriale
Industries
Institute of Technology
Insurance
International
Interstate
Investissements
Investment
Investments
Investors
Kennels
Machines
Magasins
Management
Marine
Marketing
Markets
Media
Mercantile Exchange
Mining
Motor
Motors
News Service
Optical
Organization
Petrole
Petroleum
Pharmacare
Pharmaceutical
Pharmaceuticals
Pharmaceutiques
Pottery
Press
Radio
Recherche
Records
Rescue
Reserve
Rouge
Régulation
Savings
Secure Electronic Transaction
Securities
Services
State Police
Stock Exchange
Stores
Systems
TV
Technologie
Technologies
Technology
Telegraph
Television
Tours
Télévision
Utilities
Wanderers
Ware
Tribunal
Consultants
Examinations
Examination Board
Trains
Newsroom
Newsdesk
Commodities
Medical
