# Supplementary material for: ScholarLens: extracting competences from research publications for the automatic generation of semantic user profiles
Source: PeerJ journal article supplement (doi:10.7717/peerj-cs.121), 2017-07-03
Supplement: Pipeline.zip [file Pipeline.zip › Pipeline/gate/plugins/ANNIE/resources/gazetteer/org_key_cap.lst]

ACQUISITION
AFFAIRES
AFFAIRS
AIRCRAFT
AIRLINES
AIRWAYS
ASSOCIATES
ASSURANCE
AVIATION
BANCORP
BOAT COMPANY
BOATS
BRANDS
BREWERY
CAPITAL
CARE
CHEMICALS
CHRONICLE
CIRCUS
COALITION
COMMITTEE
COMMUNICATIONS
COMPUTER
CONSULTING
CONTAINERS
CORPS
COST
DATA
DEPARTMENT STORE
DESIGN
DEVELOPMENT
DISTANCE
DREW
DRILLING
EDUCATION
ELECTRIC
ELECTRICITY
ELECTRIQUES
ENERGIE
ENERGY
ENGINES
ENTERPRISE
ENTERPRISES
EQUITABLE
FéDéRAL
FEDERAL
FINANCIAL
FIRE RESCUE
GéNéRAL
GéNéRALE
GAS
GESTION
HOLDINGS
INDUSTRIALE
INDUSTRIES
INSTITUTE OF TECHNOLOGY
INSURANCE
INTERNATIONAL
INTERSTATE
INVESTISSEMENTS
INVESTMENT
INVESTMENTS
INVESTORS
KENNELS
MACHINES
MAGASINS
MANAGEMENT
MARINE
MARKETING
MARKETS
MEDIA
MERCANTILE EXCHANGE
MINING
MOTOR
MOTORS
NEWS
NEWS SERVICE
OIL
OPTICAL
ORGANIZATION
PETROLE
PETROLEUM
PHARMACARE
PHARMACEUTICAL
PHARMACEUTICALS
PHARMACEUTIQUES
POTTERY
POWER
PRESS
RADIO
RéGULATION
RECHERCHE
RECORDS
RESCUE
RESERVE
ROUGE
SAVINGS
SECURE ELECTRONIC TRANSACTION
SECURITIES
SERVICES
STATE POLICE
STOCK EXCHANGE
STORES
SYSTEMS
TéLéVISION
TECHNOLOGIE
TECHNOLOGIES
TECHNOLOGY
TELEGRAPH
TELEVISION
TIMES
TOURS
TV
UTILITIES
WANDERERS
WARE
