# Supplementary material for: ScholarLens: extracting competences from research publications for the automatic generation of semantic user profiles
Source: PeerJ journal article supplement (doi:10.7717/peerj-cs.121), 2017-07-03
Supplement: Pipeline.zip [file Pipeline.zip › Pipeline/gate/plugins/ANNIE/resources/gazetteer/person_ambig_lower.lst]

abbo
abi
acacio
adamadele
adolphe
agniezka
aine
ainsley
ainslie
aki
alanalbert
alec
alex
alexis
ali
aliyah
alvaro
amid
anatoli
andree
anh
annabella
anny
anouk
antoni
ariel
arlette
armen
arnaud
arsene
arsinee
artemis
asa
asankoul
ashley
assia
attilio
auggie
auguste
aurelie
avery
azriel
bae
bakary
barbra
bembol
bernardo
bette
billie
birdy
blaine
blake
blount
boumediene
brett
brooke
bryn
burtcab
callisto
carel
carey
carole
carriecary
carroll
cary
casey
cass
cassidy
chaka
charlie
cheungchiara
cheyenne
chris
chun
cletus
coline
corey
cory
courtney
daisuke
dana
dani
dany
darby
darcy
darnell
davor
dee
deepa
deng
deran
derya
devon
didier
diop
djillali
domi
dominique
donogh
dorithea
edie
edouard
eldar
eli
elia
elie
elvire
emilie
enid
ennis
enzo
etienne
ettore
euguene
evelyne
fabien
fabrice
fadil
fanta
fats
federico
felicidad
fernand
fettouma
firmine
florent
francis
franck
frederic
frederico
fredric
g=d6ran
gabriele
gaelegarcia
gaygeena
gefforey
germaine
gian
gianfranco
gilles
gino
giorgio
gjon
glenn
guennady
guo
hailey
han
hanan
hani
hankhans
hassan
henrique
hollis
hugues
idrissa
ihab
ildiko
illinois
indu
iri
isaach
isabella
ivens
jackie
jael
jaime
jamal
jamie
jan
jayme
jeannot
jeffery
jeroen
jessie
jin
jiri
jo
jody
johanne
jordan
joris
josef
josiane
josse
jude
julien
junko
kadour
kae
kai
kala
kalifa
kalle
kamali
kami
kapila
karel
kari
karine
karoly
karsten
kasey
katharine
katherina
kelly
kelsey
kendall
kerry
khaled
khorshed
kim
kinsey
kris
krishna
kyle
lacey
ladislao
ladislav
lang
laslo
lauren
lazare
leonie
les
lesley
leslie
lilah
lindsay
lindsey
lois
lon
lonnie
lopez
loren
lothaire
luc
luchino
ludvik
luien
lutherlydia
lys
mabelmacha
mackenzie
madelenine
madhu
madison
malcom
mallory
manika
manjira
manoel
mao
marcello
marielle
marion
marj
marjoe
marlee
marlowe
maruchka
massimo
mauli
maxy
mayameg
mel
meredith
meriwether
merrill
micah
michal
micheline
mickey
midred
milly
mimi
mireille
mohamed
momo
mookie
morgan
mosi
moussa
mrinal
myrddin
naky
nanni
nayo
neith
nicky
nicol
nicoletta
nike
nilita
nino
noel
noshka
nuru
ole
ophrah
ornella
oumar
palo
patt
paz
pepin
perhan
pili
pino
quinn
rae
rainer
rajesh
raji
randal
randi
raphaelle
reagan
reizl
remy
renny
rez
rickie
ripley
ritarob
roca
romuald
romy
ron
roni
rosanna
runa
sabine
sacha
sady
salome
sam
samson
sandrine
sanjiv
sasha
satyajit
savion
serdar
serguei
shabana
shan
shannon
shanti
shea
shelby
shelley
sidi
sigorney
silvaine
sissi
soriba
sorley
souleymane
spencer
stephane
stevie
sumit
suzzy
svevo
sydney
sylvie
talal
tamas
tani
tanja
tao
taumaturgo
taylor
tcheky
tchelley
tex
therese
tierney
tieu
toni
tonino
toto
truong
tseula
tye
ullrich
ulysse
val
vanny
vasilie
vassili
veit
vila
virna
vitin
vivien
vlad
vsevolod
vuong
whitney
whoopy
winny
witek
yaphet
yohji
yosha
youri
youssef
yuma
zan
zesiro
zhang
zoya
abbo
abi
acacio
adamadele
adolphe
agniezka
aine
ainsley
ainslie
aki
alanalbert
alec
alex
alexis
ali
aliyah
alvaro
amid
anatoli
andree
anh
annabella
anny
anouk
antoni
ariel
arlette
armen
arnaud
arsene
arsinee
artemis
asa
asankoul
ashley
assia
attilio
auggie
auguste
aurelie
avery
azriel
bae
bailey
bakary
barbra
bembol
bernardo
berry
bette
billie
billy
birdy
blaine
blake
blount
bobby
boumediene
brett
brook
brooke
bryn
buddy
burtcab
callisto
cam
carel
carey
carmine
carole
carriecary
carroll
cary
casey
cass
cassidy
chaka
chance
chase
cheungchiara
cheyenne
chris
chun
cletus
coline
constant
corey
cory
count
courtney
daisuke
dale
dana
dani
dany
darby
darcy
darnell
davor
dee
deepa
deng
deran
derya
devon
didier
diop
dizzy
djillali
domi
dominique
donogh
dorithea
duke
edie
edouard
elan
eldar
eli
elia
elie
elvire
emilie
emir
enid
ennis
enzo
etienne
ettore
euguene
evelyne
fabien
fabrice
fadil
fanta
fats
federico
felicidad
fernand
fettouma
firmine
florent
francis
franck
frederic
frederico
fredric
g=d6ran
gabriele
gaelegarcia
gaygeena
gefforey
germaine
gian
gianfranco
gill
gilles
gino
giorgio
gjon
glenn
guennady
guo
hailey
han
hanan
hani
hankhans
hassan
henrique
hollis
honor
hugues
idrissa
ihab
ildiko
illinois
indu
iri
isaach
isabella
ivens
jackie
jael
jaime
jamal
jamie
jan
jayme
jean
jeannot
jeffery
jeroen
jessie
jin
jiri
jo
jody
johanne
jolly
jordan
joris
josef
josiane
josse
jude
julien
junko
kadour
kae
kai
kala
kalifa
kalle
kamali
kami
kapila
karel
kari
karine
karoly
karsten
kasey
katharine
katherina
kelly
kelsey
kendall
kerry
khaled
khorshed
kim
kin
kinsey
kit
kris
krishna
kyle
lacey
ladislao
ladislav
lane
lang
laslo
lauren
lazare
lee
leonie
lesley
leslie
lilah
lindsay
lindsey
lino
lois
lon
lonnie
lopez
loren
lothaire
luc
luchino
ludvik
luien
lutherlydia
lys
mabelmacha
mackenzie
madelenine
madhu
madison
malcom
mallory
manika
manjira
manoel
mao
marcello
marielle
marion
marj
marjoe
marlee
marlowe
marshall
maruchka
mason
massimo
mauli
maxy
mayameg
mel
meredith
meriwether
merle
merrill
micah
michal
micheline
mickey
midred
milly
mimi
mireille
mohamed
momo
mookie
morgan
mosi
moussa
mrinal
myrddin
naky
nanni
nayo
neith
nicky
nicol
nicoletta
nike
nilita
nino
noel
noshka
nuru
ole
ophrah
oriel
ornella
oumar
palo
pat
patt
paz
pea
pee
pepin
perhan
pier
pili
pino
quinn
rae
rainer
rajesh
raji
randal
randi
randy
raphaelle
raven
reagan
reizl
remy
renny
rez
rickie
ripley
ritarob
robin
roca
romuald
romy
ron
roni
rosanna
rowan
rowdy
rube
runa
sabine
sacha
sady
salal
salome
sam
samson
sandrine
sandy
sanjiv
saran
sasha
satyajit
savion
serdar
serguei
shabana
shan
shannon
shanti
shea
shelby
shelley
sidi
sigorney
silvaine
sissi
soriba
sorley
souleymane
spencer
spike
stephane
stevie
sumit
suzzy
svevo
sydney
sylvie
talal
tam
tamas
tani
tanja
tao
taumaturgo
taylor
tcheky
tchelley
terry
tex
therese
tierney
tieu
toni
tonino
toto
truong
tseula
tye
ullrich
ulysse
val
valentine
vanny
vasilie
vassili
veit
vila
virna
vitin
vivien
vlad
vsevolod
vuong
wee
whitney
whoopy
win
winny
witek
yaphet
yohji
yosha
youri
youssef
yuma
zan
zesiro
zhang
zoya
