# Supplementary material for: ScholarLens: extracting competences from research publications for the automatic generation of semantic user profiles
Source: PeerJ journal article supplement (doi:10.7717/peerj-cs.121), 2017-07-03
Supplement: Pipeline.zip [file Pipeline.zip › Pipeline/gate/plugins/ANNIE/resources/gazetteer/person_female_ambig.lst]

Abbey:kind=ambig
Acacia:kind=ambig
Adorable:kind=ambig
Aka:kind=ambig
Alba:kind=ambig
Allie:kind=ambig
Ally:kind=ambig
Alpha:kind=ambig
Amber:kind=ambig
Ambrosia:kind=ambig
Amethyst:kind=ambig
Anatolia:kind=ambig
Andromeda:kind=ambig
Anemone:kind=ambig
Angel:kind=ambig
Apple:kind=ambig
Aran:kind=ambig
Aurora:kind=ambig
Autumn:kind=ambig
Bambi:kind=ambig
Bat:kind=ambig
Bella:kind=ambig
Bet:kind=ambig
Bliss:kind=ambig
Brandy:kind=ambig
Brittany:kind=ambig
Bunny:kind=ambig
Candy:kind=ambig
Cat:kind=ambig
Charisma:kind=ambig
Charity:kind=ambig
Chastity:kind=ambig
Chelsea:kind=ambig
Cherry:kind=ambig
Cinnamon:kind=ambig
Clare:kind=ambig
Coral:kind=ambig
Corn:kind=ambig
Corona:kind=ambig
Crystal:kind=ambig
Daffodil:kind=ambig
Dahlia:kind=ambig
Daisy:kind=ambig
Dixie:kind=ambig
Domino:kind=ambig
Ebony:kind=ambig
Eireann:kind=ambig
Emerald:kind=ambig
Faith:kind=ambig
Fang:kind=ambig
Fawn:kind=ambig
Fedora:kind=ambig
Filipina:kind=ambig
Florence:kind=ambig
Flower:kind=ambig
Gala:kind=ambig
Gale:kind=ambig
Gay:kind=ambig
Gazelle:kind=ambig
Georgia:kind=ambig
Gin:kind=ambig
Ginger:kind=ambig
Glory:kind=ambig
Grace:kind=ambig
Gypsy:kind=ambig
Halcyon:kind=ambig
Hang:kind=ambig
Harmony:kind=ambig
Hazel:kind=ambig
Heather:kind=ambig
Hind:kind=ambig
Honour:kind=ambig
Hue:kind=ambig
Hyacinth:kind=ambig
Io:kind=ambig
Ira:kind=ambig
Iris:kind=ambig
Isa:kind=ambig
Jade:kind=ambig
Jain:kind=ambig
Jan:kind=ambig
Jasmine:kind=ambig
Jellybean:kind=ambig
Joy:kind=ambig
June:kind=ambig
Karma:kind=ambig
Kes:kind=ambig
Kitty:kind=ambig
Lark:kind=ambig
Lily:kind=ambig
Luna:kind=ambig
Lute:kind=ambig
Mama:kind=ambig
Margarita:kind=ambig
Margherita:kind=ambig
Mead:kind=ambig
Meadow:kind=ambig
Melody:kind=ambig
Mercy:kind=ambig
Merry:kind=ambig
Misty:kind=ambig
Nan:kind=ambig
Ode:kind=ambig
Olive:kind=ambig
Olympia:kind=ambig
Opal:kind=ambig
Pansy:kind=ambig
Pat:kind=ambig
Patience:kind=ambig
Pearl:kind=ambig
Pebbles:kind=ambig
Peg:kind=ambig
Penny:kind=ambig
Pepper:kind=ambig
Peta:kind=ambig
Pocahontas:kind=ambig
Poppy:kind=ambig
Prairie:kind=ambig
Primrose:kind=ambig
Prudence:kind=ambig
Psyche:kind=ambig
Queen:kind=ambig
Rose:kind=ambig
Rosemary:kind=ambig
Rosetta:kind=ambig
Ruby:kind=ambig
Sable:kind=ambig
Saga:kind=ambig
Sage:kind=ambig
Sahara:kind=ambig
Sapphire:kind=ambig
Sari:kind=ambig
Savannah:kind=ambig
Scarlet:kind=ambig
Scout:kind=ambig
Serenity:kind=ambig
Sheba:kind=ambig
Sierra:kind=ambig
Sky:kind=ambig
Skye:kind=ambig
Sloan:kind=ambig
Socks:kind=ambig
Soliel:kind=ambig
Stella:kind=ambig
Stormy:kind=ambig
Summer:kind=ambig
Sung:kind=ambig
Sunshine:kind=ambig
Tab:kind=ambig
Tally:kind=ambig
Tawny:kind=ambig
Taylor:kind=ambig
Teal:kind=ambig
Teddie:kind=ambig
Tempest:kind=ambig
Tigris:kind=ambig
Treasure:kind=ambig
Trinidad:kind=ambig
Tulip:kind=ambig
Velvet:kind=ambig
Venetia:kind=ambig
Venus:kind=ambig
Verity:kind=ambig
Victoria:kind=ambig
Violet:kind=ambig
Virginia:kind=ambig
Willow:kind=ambig
Warri:kind=ambig
Rain:kind=ambig
Carry:kind=ambig
