# Supplementary material for: ScholarLens: extracting competences from research publications for the automatic generation of semantic user profiles
Source: PeerJ journal article supplement (doi:10.7717/peerj-cs.121), 2017-07-03
Supplement: Pipeline.zip [file Pipeline.zip › Pipeline/gate/plugins/ANNIE/resources/gazetteer/person_female_lower.lst]

Ãde
aaliyah
Ãzge
aba
ababuo
abagbe
abaigeal
abana
abayomi
abbie
abby
abebi
abegaila
abeje
abeke
abelia
abena
abeni
abeo
abha
abichayil
abidemi
abiela
abigail
abigayil
abihail
abikanile
abilene
abimbola
abiona
acantha
acenith
achala
achava
achsah
ada
adah
adalgisa
adalheid
adalina
adaline
adamma
adara
addiel
addolorata
Íde
adebola
adedagbo
adela
adelaida
adele
adeleke
adelina
adeline
adeola
adesimbo
adesina
adhika
adhita
adia
adiel
adira
adonia
adora
adowa
adria
adriana
adrianna
adrianne
adrienne
adzo
aegea
aemilia
aeola
aerin
aesha
afafa
afiya
afryea
afua
agalia
agata
agatha
agathe
ageneti
aghna
agnella
agnes
agnieszka
ahalya
ahavah
ahilya
ah-lam
ahonui
ahulani
ahyana
aideen
aifric
aigneis
aikaterine
aiko
aileen
ailianna
ailis
aimee
aimiliona
aina
ainakea
ainalani
ainanani
aingeal
airina
airyn
aisha
aiyetoro
aja
ajalaa
ajeya
akahana
akahele
akako
akala
akamai
akanke
akasuki
aka'ula
akeakamai
akemi
akhila
akilah
akilina
akosua
akua
akwete
akwokwo
alaba
alaina
alake
alala
alana
alannah
alannis
alastrina
alastriona
alaula
alcinda
aldora
alease
alebeta
alecx
alei
alekanederina
alema
alena
alesa
alessa
alessandra
alessia
alethea
aletia
alexa
alexandra
alexandria
alexia
alexine
alfreda
alice
alicia
alida
alile
alina
alinda
aline
alisa
alisha
alison
alissa
alitzah
alke
allannah
allegra
allegria
allison
allyson
alma
alohalani
alohanani
alohilani
aloisia
aloka
alona
althaia
althea
althena
aluna
alysen
alyson
alyssa
alzbeta
ama
amadi
amala
amalia
amana
amanda
amarante
amaranth
amariah
amarjaa
amaryllis
amberlee
ambika
ambre
ambrosina
amee
amelia
amelina
amice
amidah
amiela
amilee
amina
aminah
amira
amisha
amity
amoli
amparo
amy
amy-sue
ana
anadaria
anais
anala
analise
anastasia
anastazie
anatasia
anatonia
andela
andra
andrea
andria
andriana
andrine
andromede
anela
anezka
angÃ¨le
angèle
anganaa
angela
angele
angelica
angelika
angeliki
angelina
angelique
angie
angyalka
ani
ania
aniana
anike
aniko
anila
anima
anise
anisha
anita
anitara
anke
ann
anna
annabel
annabelle
annabeth
annalee
annaliese
annalisa
anne
anneli
annella
annemarie
annessa
annette
annick
annie
annis
annitta
annmarie
annunziata
anselma
anthea
antheia
antje
antoinette
antonella
antonia
anuerin
anuhea
anuli
anura
anusheela
anya
aoi
aolani
aperila
aphrael
aphrodite
apolline
apollonia
apphia
apsara
ara
arabella
aracelis
aradhana
arana
arete
aretha
aria
ariadne
ariane
arianna
arianne
arieh
arielle
arlene
arlie
artemisia
artia
aruna
arunika
asabi
asako
asceline
asenata
asenath
asha
ashling
ashni
ashura
asisya
asma
asmee
aspasia
assumpta
assunta
asta
astaroth
aster
astra
astrid
astrithr
asya
atalante
atarah
athalia
athanasia
athena
aubrey
aude
audere
audra
auguseta
augusta
augusteen
auina
aura
aure
aurelia
aurore
ava
avani
aveline
aveza
avia
avila
avra
avril
ayah
ayako
ayameko
ayelet
ayesha
ayobunmi
ayodele
ayofemi
ayoka
ayoluwa
ayoola
ayumi
azaria
Özge
aziza
azuba
azucena
baako
baba
bacall
bachiko
baderinwa
badriyyah
bahaar
bahati
bahija
bahira
bairbre
bakara
bakul
bakura
balbina
balinka
bambina
banan
banhi
banita
bano
baptista
baptiste
barbara
barbie
barbora
barbro
bari
barika
barkait
barran
bashiyra
basila
basima
basma
bastienne
bateseba
bathilda
bathsheba
bathshua
batini
batya
batzra
bayo
bea
bearnas
beata
beatarisa
beate
beatha
beathag
beatrice
beatrissa
beatrix
bebhinn
becca
bechira
becki
becky
bedelia
bedriska
beeja
beitidh
beitiris
bejide
bela
belia
beliarosa
belinda
belva
benedetta
benedikta
benedykta
benigna
benita
bente
berachah
berdine
berecyntia
berenadeta
berenice
berenike
berent
bereta
bernadette
bernardine
berneen
bernice
bernita
berrin
berta
bertha
berthe
beruchiya
beryl
bess
bessie
beta
beth
bethan
bethany
bethel
betrys
betsabe
betsy
bettina
betty
betuel
betula
betulah
betya
beulah
bev
beverley
beverly
beverlyn
bevin
bhamini
bhanumati
bharati
bhavika
bhictoria
bhuma
bhumika
bianca
bibi
bibiane
bich
bidelia
bidina
bilhah
billie jo
bina
binali
binyamina
bionda
bira
birdie
birgit
birgitta
birigita
bithiah
bithynia
bjork
blahe
blair
blanca
blanche
blanka
blath
blathnaid
blodwen
blythe
boadicea
bobbie
bobina
bobo
bodil
bogdana
bogumila
boguslawa
bohdana
boinaiv
bolade
bolanile
boleslawa
bona
bong-cha
bonita
bonnie
borbala
borgny
boupha
bozidara
braelyn
brande
brandi
branwen
breeda
brenda
brenna
bretislava
briana
briann
brianna
brianne
bride
bridget
brieanna
brigantia
brighid
brigida
brigitte
briseis
brites
britney
britta
brittian
bronislava
bronwen
bruna
brunella
brunette
brunhilde
brygid
brylieva
brynhild
bryony
bua
buffy
bunmi
buseje
buthayna
byhalia
cabalina
cachay
caci
cacilia
cadi
cai
caimile
cainwen
cairistiona
cait
caitir
caitlin
caitria
caitriona
calandra
calantha
caledonia
caleigh
calida
caliopa
calla
calle
calli
callie
callifae
calligenia
callirrhoe
callista
caltha
calumina
camelia
camella
cami
camila
camilla
camille
cammie
cammy
canaedea
candace
candee
candelaria
candi
candice
candida
candie
candis
candita
candra
canducha
cantara
caparina
capri
caprice
cara
caren
caresse
cari
carilla
carin
carina
carine
carisa
carissa
carita
carla
carlana
carlee
carleigh
carlen
carlene
carley
carlie
carlin
carline
carling
carlita
carlota
carlotta
carly
carma
carmania
carmea
carmel
carmela
carmeli
carmelina
carmelita
carmella
carmen
carmencita
carmia
carmie
carmilina
carmina
carmita
carmiya
carmy
carna
carni
carnia
carniela
carny
caro
carol
carola
caroliana
carolina
caroline
carolyn
caron
caroon
carrie
carrol
carrola
carsten
caryl
carys
casey
casiphia
cassandra
cassandre
cassarah
cassia
cassie
castalia
catalina
catarina
catava
cate
caterina
cath
catharina
catharine
catherine
cathie
cathleen
cathlin
cathryn
cathweg
cathwg
cathy
catie
catlee
catlin
catrena
catrin
catrina
catriona
cavanna
caye
cayoya
ceara
cecca
ceccarella
cecelia
cecile
cecilia
cecilie
cecily
cecina
ceit
ceiteag
celadonia
celandine
cele
celena
celene
celesta
celeste
celestina
celestine
celestyn
celestyna
celia
celie
celina
celinda
celinde
celine
celinee
cella
celvia
cendrine
cerella
ceres
ceridwen
cerise
cevanna
chaanach
chafsiya
chahna
chaitali
chaitra
chalcedony
chalese
chamania
chameli
chan
chanda
chandani
chandelle
chandi
chandni
chandra
chandrakanta
chandrima
chandrjaa
chanel
chania
chanina
chanit
channa
channary
chantal
chantel
chanterelle
chantil
chantou
chantrea
chanya
chaonaine
chapa
chapawee
charis
charise
charissa
charita
charla
charlaine
charleen
charlene
charlina
charline
charlot
charlotta
charlotte
charly
charmain
charmaine
charmian
charmion
charna
charnette
charron
charu
charumati
charyl
chashmona
chasia
chasida
chasina
chau
chausiku
chava
chavi
chaya
chazmin
chazona
chedra
cheftziya
cheifa
cheiron
chel
chelle
chelsey
chemda
chemdiah
chenia
chenoa
cher
chere
cheri
cherie
cheril
cherilyn
cherisa
cherise
cherish
cherlyn
chermona
cheryl
cheryll
chesna
chevonne
chiara
chiba
chichi
chika
chikako
chiku
chilali
chimalis
chimene
chin-sun
chinue
chipo
chiriga
chita
chitsa
chiyo
chiyoko
chizu
chizuko
chloe
chloris
cho
choko
chola
cholena
chonsie
choomia
choon-hee
choyo
chrislyne
chrispy
chrissie
chrissy
christa
christabel
christal
christel
christelle
christiana
christiane
christianne
christie
christin
christina
christine
christinha
christy
chrysanta
chryssa
chrystal
chryste
chu hua
chuki
chula
chulda
chuma
chumani
chun
chunbai
chung-ae
chung-cha
ciannait
ciara
ciarra
cicely
cicily
ciel
ciera
cierra
cilehe
cili
cilicia
cilka
cilla
cinda
cindi
cindie
cindra
cindy
cinofila
cinthia
cinzia
cipriana
cissie
cissy
claire
clairette
clara
clarabelle
clarenda
clareta
clarey
claribel
clarice
clarin
clarina
clarinda
clarine
clarisa
clarissa
clarita
clarivel
clarotte
clarrissa
clary
claudette
claudia
claudina
claudine
clea
clematia
clemence
clemencia
clementine
cleo
cleopatra
cliodhna
clo
clorinda
clothilde
clotilda
clovia
clytie
coahoma
cocheta
coelfinnia
cohila
colanda
coleen
colena
colene
coletta
colette
colie
colleen
collette
colline
colly
colomba
colombe
colombina
con
concepcion
concetta
conchobarre
concordia
connie
connie-lynne
conny
conseja
consilia
consolacion
consolata
constacia
constance
constancy
constantia
constantina
constantine
constanza
constanze
consuela
consuelo
cora
corah
coralie
corazon
cordelia
cordula
coreen
corene
coretta
corette
cori
corina
corine
corinna
corinne
corliss
cornela
cornelia
cornella
cornelle
cornie
cornilia
corynn
coseta
cosima
courteney
cozette
creirwy
crescentia
cressa
cressida
cressie
crissie
crissy
cristen
cristina
cristiona
cristy
cruza
culver
cybele
cybil
cybill
cybille
cyd
cyma
cymone
cynara
cyndel
cyndi
cyndie
cyndy
cynsa
cynth
cyntheria
cynthia
cypria
cyra
cyrene
cyrille
cytherea
czenzi
düriye
dÃ¼riye
daciana
dagmar
dagna
dagny
dai
dakarai
dalibora
dalila
dalili
dalya
damalis
damaris
damayanti
damhnait
damia
damiana
danacia
danae
danean
danell
danette
dania
daniah
danica
daniela
danielle
danika
danita
danna
dannah
danni
danniela
dannii
danuta
danya
dao-ming
daphne
dara
darah
darbi
darcee
d'arcy
darenda
daria
darice
darie
darla
darleen
darlene
darlonna
darpitaa
darsey
darsha
darshelle
dasha
datiah
davina
daw
dawn
da-xia
dayaa
dayanita
dayna
dayo
deandra
deanna
deanne
deavon
deb
debbie
debby
deborah
debra
decembra
decla
deeann
deema
deena
deianira
deidre
deirdre
deitra
dela
delaney
delfina
delia
delicia
delilah
delja
della
delores
deloris
delphia
delphine
delphinia
delwyn
delyth
demetria
demi
dena
denell
denise
deolinda
dervila
desiree
desta
destina
destiny
deva
devahuti
devaki
deval
devanee
devasha
devi
devika
devin
devnet
devorah
devorgilla
deyanira
dezba
dhanadaa
dhara
dharinee
dharitri
dhavala
di
diana
diane
dianna
diantha
diederike
dieu-kiem
dija
dilwen
dilys
dimona
dina
dinah
dione
dionisa
dionne
disa
divonah
divya
dmyphnah
dobrila
dobromila
dobromira
dobroslava
dofi
doireann
doli
dolly
dolores
dominika
dominique
domitilla
donalda
donata
donatella
dondi
donella
donna
donnag
donoma
donya
dora
dorean
doreen
doreka
dores
doretta
doria
dorie
dorina
dorinda
dorinnia
doris
dorolinda
dorota
dorotea
dorothea
dorothee
dorothy
dorothya
dosya
doto
dottie
doveva
dowanhowee
downett
drahomira
draupadi
drisana
drusilla
dularee
dulce
dulcie
dulcinea
dumia
durga
duriye
dusana
duscha
dwynwen
dyani
dymphna
dyvette
dziko
eabha
eadaoin
ealasaid
ealga
eamhair
eanna
earleen
earlene
eartha
eavan
ebba
ebun
ecaterina
echo
eda
edana
ede
edelmira
eden
edena
edenia
ediah
edith
edmee
edna
ednah
eduarda
edvige
edwina
edyta
e'epa
efah
effemy
effie
efia
efrata
eglah
ehani
ehawee
eibhlin
eiddwen
eilah
eileanor
eileen
eileithyia
eilidh
eilis
eilona
eimhear
eimile
einmyria
eira
eireen
eirene
eirwen
eistir
eithne
ekaterina
ela
elaine
elakshi
elama
elba
eleanor
electa
electra
eleftheria
elektra
elen
elena
elenor
eleonor
eleonore
eleri
elettra
eleu
eleuthera
elfa
elfleda
elfreda
eliana
eliane
elianora
eliavah
eliezra
elili
elin
elina
elinor
eliora
elisa
elisabet
elisabeta
elisabeth
elise
elisheba
elissa
eliza
elizabeth
elke
ella
ellen
ellena
elli
ellice
ellie
ellinor
elma
eloisa
eloise
elpida
elsa
else
elsie
elspet
eluned
elva
elvira
elyse
elzbieta
emalia
emalinda
emel
emelda
emelia
emelinda
emeline
emeny
emer
emerenciana
emerenzia
emilia
emily
emma
emmanuelle
emme
emmeline
emmie
emmylou
emon
emunah
ena
enakai
encarnacion
eneida
enfiania
enfys
engracia
enola
enomwoyi
enrica
enriqua
enya
enyonyam
eoghania
epifania
erela
erendira
erianthe
erica
erika
erin
erina
erisha
erma
ermina
erna
ernest
ernesta
ernestine
ernesztina
erzsebet
esenia
esetera
eshana
eshe
esi
esmee
esmeralda
esperanza
espiridiana
estebana
estella
estelle
estephania
ester
estera
esther
estrella
esyllt
eszter
etain
etel
etela
etenia
ethalyn
ethel
etheldreda
ethete
ethna
etiennette
etni
etsu
etsuko
etsuyo
etta
eubh
eudora
eudosia
eufemia
eufenja
eugenia
eugenie
eulalia
eulalja
euna
eunice
eunika
eunike
eun-young
euphemia
euphenia
eutropia
euzebia
eva
evadne
evalina
evanegelina
evangelia
evangeline
evani
evanthe
evdokiya
eve
eveleen
evelien
evelina
evellia
evelyn
evette
evfemiya
evgeniya
evie
evina
evita
evlaliya
evrim
evzenie
ewa
ewangelina
ewelina
fabia
fabiana
fabienne
fabiola
fae
fahima
fahimee
faiva
fakapelea
fakih
falakika
fang-hua
fanny
fanua
fanya
faoiltiarna
faraji
farakika
fardoos
farida
fariha
farina
farrah
fathiyya
fatima
fatin
fatma
fatuimoana
fauna
faunia
fausta
faustina
faustyna
fawziyya
fay
faye
fayina
fayola
fayruz
fayth
fayza
fedosya
feidhelm
feige
feigel
felicia
felicie
felicite
felicity
felina
felixa
felora
felorena
fenella
feng
fenia
fenyang
feodoriya
ferdinanda
ferida
fern
fernanda
fetuu
ffleur
ffraid
fialka
fiammetta
fidela
fidelia
fidelja
fidelma
fieliki
fifi
fihaki
filia
filikitata
filippa
filomena
fina
fineeva
finella
fineongo
finola
fiona
fionnghuala
fionnuala
fiorella
fipe
fisi
flannery
flavia
fleur
flick
flo
floella
flora
floralia
floramaria
florencia
florens
florentina
florentyna
florenz
florenza
flossie
foluke
fortuna
fortunata
fotina
fran
franca
frances
francesca
franci
francina
francine
francises
francoise
francziska
frantiska
franziska
frayda
freda
frederica
frederique
freferika
freida
freya
frida
frieda
friede
friedelinde
friederike
fryda
fryderyka
fuensanta
fujiko
fulande
fulangi
fulla
fulumirani
fulvia
funsani
fusi
fusileka
fuyu
fuyuko
gabriela
gabriell
gabriella
gabrielle
gacquetta
gaenor
gaetane
gafna
gaia
gail
gaila
galadriel
galatea
gali
galiena
galilani
galina
galya
gambhira
ganesa
garima
garnette
garuda
gauri
gavriela
gavrila
gavrilla
gayan
gaye
gayla
gayle
gaynor
gayora
gazit
geela
gefen
gefjun
gelilah
gelsomina
gelya
gemina
gemma
gena
genaida
genea
generosa
genesee
genevieve
genevra
genista
gennifer
gennisheyo
genoveva
geogiana
geona
georgeanna
georgeanne
georgeta
georgette
georgianna
georgie
georgina
georgine
geralda
geraldine
geralyn
gerd
gerda
geri
gerlinde
gersemi
gerta
gertraud
gertrud
gertruda
gertrude
gertrudes
gertruida
gerushah
geva
gevirah
ghaliya
ghislain
ghislaine
ghita
ghufran
gia
giacinta
gianina
gianna
giborah
gigi
gilada
giladah
gilanah
gilberta
gilbertina
gilda
giliah
gillian
gimra
gina
ginelle
ginevra
ginneh
ginnie
ginny
gioconda
giovanna
gisa
gisela
giselle
gislaug
gita
gitana
gitanjali
gitel
gitika
giuditta
giulia
giulietta
giuseppina
giustina
givola
gizella
gizem
gjuzel
gladi
gladiola
gladys
glenda
glenna
glennette
glenys
gloria
gloriana
glynis
glynn
gobnait
gobnata
godeliva
godiva
goitsemedime
golda
goldarina
goldie
goldina
goloria
gosling
goya
gozala
grÃ¡inne
gracie
graciela
gracja
grainne
gráinne
grania
gratia
grazia
graziella
grazyna
gressa
greta
gretchen
grete
gretel
griet
griselda
guadalupe
gudrun
guilhermma
guillelmina
guillermina
guinevere
gulielma
gull
gunda
gundula
gunilla
gunnhild
gustava
gwen
gwenda
gwendolen
gwendoline
gwendolyn
gweneal
gweneth
gwenfrewi
gwenhwyfar
gwenllian
gwenola
gwenyth
gwyned
gwyneth
gyÃ¶rgyi
gyanda
györgyi
gyorgyi
habiba
habibah
hachi
hadassah
hadi
hadiya
hadley
hadya
haemi
hae-won
hafsah
hagan
hagia
hagne
haidee
haidi
ha'iku
haimi
haiwee
hajar
hajna
hajnal
hakumele
hala
halapua
halcyone
haldis
haleakua
haleigh
haley
halima
halina
hallie
halolani
halona
hama
hamako
hamida
hana
hanaa
hanae
hanako
hanh
hanifa
hanita
haniyya
hanka
hanna
hannah
hansa
hansika
hansila
hansine
hantaywee
haqikah
haralda
hariata
harita
harmonia
harriet
harrietta
harsha
harshida
harshika
haru
harue
haruko
harumi
hasana
hasanati
hasika
hasina
hasna
hateya
hathor
hatsu
hattie
haukea
haulani
haunani
hau'oli
hava
hawa
haya
hayat
hayfa
hayley
hebe
heda
hedda
hedia
hediah
hedvig
hedviga
hedvika
hedwig
hedwiga
hee-young
heide
heidi
heidrun
heike
helah
helaine
helana
helen
helena
helene
helga
helge
helia
helmine
heloise
hemali
hembadoon
hendrika
henrietta
henrike
henriqueta
henryka
hephzibah
hera
herlindis
hermia
hermina
hermine
hermione
hersilia
hesper
hester
hesther
hialeah
hiawassee
hiba
hide
hideyo
hieronymus
hikmat
hikuleo
hilalia
hilaria
hilary
hilda
hildegard
hillary
hillevi
himani
hinda
hipakeiki
hiral
hirena
hiroko
hisa
hisae
hisako
hisano
hisayo
hisolda
hiva
hiwahiwakeiki
hjordis
hlin
hoa
hoaka
hoalohalani
hoalohanani
hoku'alohi
hokuao
hokuaonani
hokulani
hola
hollie
holly
holomakani
honekakala
honorata
honoria
honovi
ho'olana
horacia
hortencia
hortense
hortensia
hoshi
hoshiko
hoshiyo
ho-sook
hua
huali
huata
huberta
huda
huette
hughina
huguette
hui-fang
hulda
huluava
humita
huong
hurriyyah
husn
husniya
huyana
huynh
hwa-young
hyacinthe
hyo-sonn
hyoun
hypatia
hyun-ae
hyun-ok
hyunwoo
ianete
iantha
ianthe
ibby
ibtihaj
ibtisam
ichchani
ida
idaa
idalia
idalina
idelle
ides
idesta
idette
idolina
idona
idonea
idonia
idony
idowu
idra
idris
idriya
ieda
ienipa
ifama
ife
ifetayo
ifigenia
ihsan
iku
ikuko
ikuseghan
ila
ilana
ilaria
ileana
ilene
ilesha
ilia
ilka
ilona
ilsa
ilse
ilvira
imae
imagina
imako
imala
iman
imelda
imen
immacolata
imogen
imogene
ina
in'am
inanna
inas
inaya
indira
indra
indranee
indrayani
ine
ines
inessa
inette
inez
inga
inge
ingeborg
ingegerd
ingrid
inis
inna
inny
inoa
io'ana
ioanna
ioke
iola
iolana
iolanda
iolanthe
iona
ione
ionia
iosepine
iphigeneia
irena
irene
irenee
irina
irisa
irma
isabeau
isabel
isabelita
isabelle
isadora
isamu
isaura
iseabail
iseult
isha
ishana
ishi
ishiko
isibeal
isidora
isis
isla
ismat
ismene
isoke
isolde
isra
itiah
i'tidal
itinsa
ituha
iuana
iudita
iuginia
iuile
iulalia
iulia
iuliana
iune
iusitina
ivana
ivelisse
iverem
ivey-lynn
ivonne
ivria
ivy
iwa
iwalani
iwilla
iwona
iza
izabel
izabella
izdihar
izegbe
jaamini
jacalyn
jacaranda
jacinda
jacinta
jacinte
jacinthe
jackeline
jackelyn
jackie
jaclyn
jacoba
jacqueline
jacqui
jacynth
jada
jadelia
jadella
jadwiga
jae-hwa
jaha
jai
jakova
jala '
jalajaa
jalaneeli
jaleen
jaleesa
jalila
jalinda
jalini
jalitaa
jamay
jamesina
jamika
jamila
jamilla
jana
janae
janaki
janan
jane
janel
janelle
janet
janey
janhea
janice
janie
janikaa
janileny
janina
janine
janis
janita
janna
jannah
janne
jannike
janoah
jany
japera
japhet
jarita
jarka
jarmila
jarnsaxa
jaroslava
jasmin
jassamyn
jaswinder
jathibiyya
jaustin
jawahir
jaya
jayamala
jayanti
jayashree
jaylene
jayma
jayna
jayne
jayti
jayvanti
jazmin
jean
jeana
jeanette
jeanie
jeanine
jeanne
jeannie
jeannine
jecoliah
jeina
jekaterina
jelena
jemima
jemimah
jemina
jemma
jemsa
jen
jena
jendayi
jenelle
jenessa
jenifari
jenine
jenna
jenni
jennie
jennifer
jenny
jensine
jerri
jerrilynn
jerusha
jerushah
jessa
jessamine
jessica
jethra
jetta
jette
jetty
jewel
jezebel
jezreel
jia
jijabai
jill
jillian
jinan
jindriska
jinelle
jin-kyong
jinnat
jinny
jirina
jivanta
joan
joanna
joanne
jocasta
joceline
jocelyn
jodha
jodi
jodie
joelle
joetta
johana
johanna
johna
jolan
jolanda
jolanta
joleen
jolene
joletta
joline
jonie
jonna
jonova
joquina
jordana
jordie
jorie
josee
josefa
josepha
josephina
josephine
josie
joss
josselyn
jowanda
joyce
joyita
joyous
jozefa
jozefina
jozsefa
juana
juanita
jubilee
judit
judita
judith
judy
judyta
juhi
julette
juli
julia
juliana
julianja
julianna
julianne
julie
julienne
juliet
julieta
juliette
juljana
jumana
jumapili
jumoke
junia
juniper
justina
justine
justyna
jutta
jyllian
jyoti
jyotsana
jyotsna
kÃ¤ethe
kaamilee
kaanan
ka' aona
kaasu
kaat
kachina
kacia
kadiah
kaelyn
kaemoxmith
kaethe
käethe
kagami
kagiso
kahlua
kahoku
kaia
kailash
kaili
kailyn
kaimalie
kaitchkma-winema
kaitlin
kaiya
kajsa
kakalina
kakielekea
kakra
kalala
kalalika
kalama
kalamela
kalana
kalani
kalaudia
kalaudina
kali
kalidas
kaligenia
kalika
kalila
kalilea
kalilinoe
kalina
kalinda
kalini
kalino
kaliona
kaliska
kalita
kallie
kalliope
kalliroe
kallisto
kalliyan
kallole
kalola
kalonice
kalota
kalote
kalpana
kaluwa
kalyani
kalyca
kalysta
kamala
kamalika
kamanika
kamaniya
kamaria
kamata
kameko
kameli
kamelia
kamika
kamilla
kamla
kamoana
kanani
kanara
kandi
kaneesha
kanestie
kanika
kaniqua
kanjanaa
kannitha
kanoa
kanta
kanti
kantimati
kanya
kaori
kaponianani
kapua
kapua'ula
kara
karas
karayan
karen
karena
karin
karina
karla
karlene
karli
karlotta
karly
karmil
karmiti
karneetsa
karola
karolaina
karolina
karoline
karolyn
karpura
karren
karuna
kasa
kasi
kasienka
kasinda
kasota
kassandra
kassia
kasturba
kat
kata
kataniya
katarina
katarzyna
kate
katelin
katerina
kath
katharina
kathe
katherine
kathie
kathleen
kathryn
kathy
katie
katina
katja
katla
katren
katrina
katrya
katura
katya
katyayani
kau-au-ointy
kaulana
kauluwehi
kausalya
kaveri
kavindra
kawa
kawaimomona
kawena
kawena'ula
kay
kaya
kayla
kayleen
kayleigh
kayley
kaylynn
kazimiera
kazuyo
kea
keahdinekeah
kealani
kealoha
ke'alohi
kedma
keeaola
keehabah
keeley
keelin
keelynn
keezheekoni
kefira
kehachiwinga
kehinde
kei
keiki
keikikalani
keilah
keisha
keke
kekilia
kelalani
kelda
keleka
keletina
kelia
kelila
kelley
kellie
kelsi
kendra
kenia
kenna
keohi
keola
keolakupaianaha
kerani
kerem
keren
kerensa
keri
kerri
kerrie
kerstin
kesava
keshet
keshia
kesi
kesia
kessem
kessie
ketifa
ketina
keturah
ketzia
ketziah
kewanee
kezia
khadija
khalida
khalila
khapkhaponimi
khara
khatijah
khloe
khristina
kiana
kiara
kibibi
kichi
kiele
kielekea
kiera
kierce
kierstyn
kieu
kifimbo
kikelia
kikilia
kiku
kiley
kilia
kim
kimama
kimaya
kimberlee
kimberlin
kimberly
kimbra
kimi
kimimela
kimmi
kimmie
kinitia
kinshasha
kinta
kira
kiran
kiri
kiriah
kiritina
kirsi
kirsten
kirsti
kirstin
kirsty
kisa
kisakye
kisha
kishi
kishori
kismet
kissa
kitra
kjerstin
klara
klarika
klarissa
klarisza
klarybel
klarysa
klaudia
klaudija
klavdiya
klementina
klementyna
klesa
klotild
knasgowa
kneshia
kodelia
kohinoor
kokumo
kolab
kolenya
kolina
koloe
kolour
koma
komal
konstanczia
kooskooskia
kora
kordelja
kore
korenelia
kori
korina
korinna
kornelia
korren
kostya
kotha
krislyn
krissy
krista
kristal
kristen
kristi
kristie
kristin
kristina
kristy
kristyanna
krisztina
krysia
krysta
krystal
krystjana
krystyna
k' sea
ksenia
ksenya
kuali
kuali'i
kukua
kulani
kuliraga
kulsoom
kulukulutea
kulwa
kulya
kumari
kunani
kunigonde
kunthea
kunto
kushali
kusum
kveta
kwamina
kwaniesha
kwanita
kyalamboka
kyla
kylie
kynthia
kyoko
kyra
kyungsoon
lÃ©onie
lÃ©onne
lÃ©onore
lÃ©ontine
l'abana
labhaoise
lachelle
lachina
lacy
ladawn
ladean
ladelle
ladonna
lagina
lahonda
laila
lajili
lajini
lakeisha
laken
lakia
laksha
lakshana
lakshmi
lala
lalage
lalika
lalita
lamis
lamya
lan
lana
lanakila
laneesha
langikula
lanie
laniuma
léonie
léonne
léonore
léontine
lara
lareyna
larisa
larissa
larrina
larshell
lashauna
lashaunda
lata
latasha
lateefa
latika
latisha
latona
latonya
latoya
laufeia
laura
lauralee
lauralynn
laure
laureen
laurel
laurene
laurentia
laurenza
lauretta
laurie
laurinda
lauryn
laverne
lavina
lavinia
lavita
lavon
lavone
lawahiz
lawn
lawuan
layla
lea
lea-ellan
leah
lealiki
leandra
leanna
leanne
leanne
lechsinska
leda
lee ann
leela
leena
lehua
leiana
leigh
leiko
leila
leilani
leisha
leisi
lelia
lena
lenice
lenora
lenore
lenusya
leocadia
leokadia
leolani
leona
leonarda
leoncia
leonne
leonor
leonora
leonore
leontine
leopolda
lesia
lesieli
leticia
letitia
letizia
leto
letycja
levana
leviah
levona
lewanna
lexa
lexi
lexine
lexy
leyi
li
lia
liadan
lian
liana
liane
lianne
libania
libby
libe
libena
liberada
licia
lida
lidiya
lidwina
lien
lien-hua
liesa
liesel
lieselotte
ligia
lihwa
lila
lilavati
lile
lili
lilia
lilian
liliana
liliane
lilika
lilike
lilith
lilli
lilly
lilo
lin
lina
linda
lindsey
lindy
linette
ling
linh
linit
lin lin
linnea
linnette
linnie
lior
liora
lisa
lisabeth
lisanne
lisbet
lisette
lisha
lissa
litonya
livna
liz
liza
lizolet
lizzie
lofn
lois
lokomaika'i
lokomaika'inani
lola
lolita
lonna
lora
lore
loreen
lorelei
lorena
loretta
lori
lorinda
lorna
lorraine
lorrie
losa
losaki
losana
lotte
lottie
louella
louisa
louise
luan
luana
luanna
luba
lubomira
luce
lucerne
lucetta
lucia
lucianna
lucienne
lucilla
lucille
lucina
lucinda
lucinde
lucita
lucja
lucretia
lucy
lucyna
lucza
ludmila
ludovica
ludwika
luigina
luigseach
luisa
lujayn
lujza
lulu
luminosa
lumusi
luned
lupe
lupita
lurette
luseane
lusela
lutricia
luz
luzia
lycia
lyda
lydia
lydie
lyndsley
lynelle
lynette
lynn
lynna
lynn anne
lyris
maayan
mabel
macaria
machi
mackenzie
mada
madailein
madeleine
madeliene
madeline
madelyn
madge
madhavi
madhulekha
madhur
madiha
madonna
mae
maedra
maegan
maeve
magaidh
magali
magan
magaskawee
magda
magdala
magdalena
magdalene
magdolna
magena
maggie
magnolia
maha
mahala
mahalath
mahalia
mahasin
mahaska
mahesa
mahi
mahika
mahima
mahira
maho
mahwah
mai
maia
maiba
maidie
maika'i
maille
mailse
mai ly
maira
maire
mairead
mairi
mairona
mairsile
maisie
maiteryi
maiya
maja
majd
maka
maka'alohi
makadisa
makaleka
makanaakua
makanamaika'i
makawee
makiko
mala
malak
malalani
malati
malavika
malcolmina
maleah
malgorzata
malia
malika
malina
malka
malkosha
mallaidh
maluhia
malvina
mamakiaeh
mamie
mamiko
manaali'i
manalani
mana'o'i'o
mana'olana
mana'olankeiki
manawale'a
mandara
mandi
mandisa
mandy
mangena
manikarnika
manjika
manjulika
manjusha
manon
mansi
manuela
manwangopath
manya
mapiya
mapuana
mara
marÃ­andre
maraalika
maríandre
maraea
marah
maranela
marata
maratina
maravilla
marcela
marcelina
marceline
marcella
marcelline
marci
marcia
marcianna
marciannette
marcille
marcy
mare
marea
margaret
margarethe
margarite
margarta
marge
margea
margery
margi
margie
margita
margo
margot
marguerite
mari
maria
mariabella
mariah
mariam
mariamne
marian
mariana
mariandre
marianne
maribel
maribeth
marie
marie-jose
mariel
mariella
marietta
marigold
marija
marijke
mari jo
marika
mariko
marilee
marilena
marilyn
marina
maris
marisa
marisha
marisol
marissa
maristela
marita
mariya
marja
marjani
marjolaine
marjorie
marketa
marla
marlena
marlene
marlis
marlo
marlyn
marni
marnie
marnina
marona
marsaili
marsha
marshan
marta
martha
marthe
martina
martine
marva
marwa
mary
marya
maryanne
marygrace
mary lou
maryvonne
masa
masago
masalina
masami
masela
masha
mashavu
masika
masilo
maskini
massima
masumi
mathilda
mathilde
matilda
matoaka
matrika
matriona
matsu
matsuko
matsuyo
matylda
maud
maude
maudisa
maudlidi
maudlin
maura
maureen
maurini
maurya
mavis
mawiyah
mawusi
maxie
maximilla
maxine
maya
mayalen
maybel
maygan
mayim
maysa
mayumi
mazhira
mckenna
meaghan
mechola
mecislava
medea
medina
mee-kyong
meena
meenatchi
mee-yon
meg
megan
meghan
mehal
mehira
mehli
mei
mei-hua
mei-lien
meinwen
meira
meiriona
meirona
mei-xing
mei-zhen
me jeong
mel
melanie
melaniya
melba
meli
melia
melice
melina
melinda
melisa
melissa
melitta
melodie
melony
melphine
mena
menasha
meng
meonah
meoquanee
meorah
merav
merelina
merima
merla
merletta
merrielle
merryanne
mersera
meryl
me'shell
mesi
meta
mette
meuy
mia
miary
mica
micaela
mi-cha
michaela
michaiah
michalina
michela
michelle
michelyne
michiko
michiyo
micki
midori
mieko
mieu
migina
migisi
miguela
mi-hi
mika
mikala
mikayla
mikazuki
miki
mikie
mikiko
mikilana
mikka
mila
milagros
milcah
mildred
milena
mili
mililani
milimili
milisena
milka
milla
millicent
millie
miloslava
mimiteh
min
mina
minako
minami
mindy
mineko
minerva
minette
ming
minnehaha
minnie
mi-ok
miquela
mira
mirabella
mirabelle
miranda
mireio
mirena
miriam
miriama
miroslava
miroslawa
miryam
misae
misao
misha
mishaila
miskaela
misoka
missy
mitena
mitra
mitsu
mitsuko
mitzi
miulana
miyo
miyuki
mizuko
mliss
mo
moana
moananani
moani
mohala
mohana
mohini
moina
moira
molly
momone
mona
moneka
monica
monifa
monika
monique
monisha
monna
monta
mora
morag
morainn
morasha
moreen
morgwen
mori
moriah
moriko
moriya
moriyo
morowa
morwenna
moshie
motoko
moweaqua
mudiwa
muhayya
muhterem
muika
muireall
muireann
muirgheal
muirne
muliya
muminah
muna
mun-hee
munirah
mura
murasaki
murdag
muriel
muteteli
mwajuma
mwanahamisi
mwanajuma
myfanwy
my-khanh
myra
myriam
myrna
myrtle
myung-hee
myung-ok
naamah
naamiah
naarah
nabiha
nabila
nada
nadezda
nadezhda
nadia
nadida
nadine
nadira
nadya
nadyan
nadzieja
naeemah
nafshiya
nagida
nahara
nahida
nahla
nai'a
na'ila
nailah
na'ima
najat
najia
najiba
najla
najwa
nalin
nalukea
namara
namono
nampeyo
nana
nanabah
nanala
nance
nancy
nandana
naneki
naneta
nanette
nani
naniahiahi
nanise
nanyamka
nanye-hi
naoko
naomi
nara
naren
naresha
narmada
nascha
naseem
nashira
nashota
nasrin
nastalya
nastasia
nastassia
nastassja
nastenka
nasya
nata
natala
natalia
natalie
natalina
nataliya
natalya
natane
nataniah
nataniela
natasha
natasja
natesa
nathalia
nathalie
nathifa
natia
natille
natka
natsu
natsuko
natsuyo
natya
nauasia
nawal
nayana
nazihah
nazira
necedah
nechama
neche
nechona
neci
neda
nedaviah
nediva
neelay
neema
neenah
neha
nehanda
neilina
neima
neka
nekoma
nel
nelda
nelia
nelina
nelita
nell
nella
nelli
nellie
nelly
nemera
nemesio
nenet
neoma
nepa
nera
neriah
nerissa
nerthus
nerys
nesiah
nessa
nest
netana
netaniah
netia
netta
nettie
neva
nevara
neves
neviah
neysa
nezika
ngoc
ngozi
nguyet
niabi
niamh
nibal
niccola
nichele
nichola
nichole
nicia
nickie
nicola
nicole
nicoleta
nicolette
nihal
nika
nikeesha
niki
nikki
nikola
nikoleta
nilsine
nima
nimah
ni'matu-allah
nimesha
nina
ninel
ninette
ninia
niniane
ninochka
ninon
ninovan
niobe
niranjana
nisha
nishi
nishie
nishiko
nishiyo
nissa
nisse
nita
nitara
nitsa
nituna
niu
niva
niya
njemile
nkosazana
nneka
nobantu
nobuyuki
noelani
noella
noelle
noemie
noirin
nola
nolanda
nolcha
nollaig
nomalanga
nombeko
nombese
nomble
nomusa
nona
nonie
nonooktowa
nonyameko
noor
nora
norah
noranne
norberta
noreen
noriko
norine
norita
noriyuki
norlene
norma
normina
noura
nourbese
nova
novia
ntsekhe
nuala
nudar
nuha
nukuluve
numa
nunciata
nunzia
n'ura
nurya
nydia
nye
nysa
nyura
obioma
oceana
octavia
oddveig
odelia
odessa
odette
odila
odile
odina
odiya
ofa
ofelia
ofelja
ofilia
ofra
oheo
ojasvee
ojinjintka
okalani
okrika
oksana
oktawja
olabisi
olaniyi
olathe
olaug
olayinka
oldriska
olena
olenka
olesia
olga
olia
oliana
olicia
olimpiada
olisa
olivette
olivia
oliwja
olufemi
olympe
oma
omada
omana
omekao
omemee
omena
ominotago
omorose
omusa
omusupe
ona
onaiwah
onawa
oneida
onella
oni
onida
oona
oonagh
opalina
opaline
ophelia
oprah
ora
oredola
orelia
oriana
oriette
orilla
orinda
orithyia
orla
orlaine
orlena
orlenda
ormonda
ornice
orpah
orseline
orsolya
ortensia
orthia
oseye
oskaloosa
oskana
osyka
otilie
ottavia
ottila
otylia
ourania
ovelia
oya
ozera
paavana
paavani
paciencia
pacifica
padma
padmasundara
padmavati
padraigin
paige
paili
paka
palila
pallas
paloma
pam
pamela
pandasala
pandita
pandora
pangiota
panna
panola
panthea
panya
panyin
paola
paolina
papina
paraskeva
parky
parthenia
parthenie
parvani
pascale
pascuala
pasua
pateizia
paterekia
pati
patia
patrice
patricia
patrizia
patsy
patti
pattie
patty
paula
paulette
paulina
pauline
paulita
pausha
pavana
pavla
pazia
pedzi
pefilia
pegah
peggy
peigi
pelagia
pelagiya
pelcia
peliah
pelipa
penelope
peni
penina
pennington
pentea
peony
pepita
peresila
perla
perpetua
persephone
persis
petra
petrina
petronela
petronilha
petronilla
petula
petulia
phaedra
phaidra
phanessa
pheakkley
phebe
phelisiana
phemia
philana
philantha
philene
philippa
phillida
phillis
philomena
phoebe
photine
phurba
phylicia
phyllis
pia
pierina
pierrette
pikka
pilaka
piliki
pilipa
pilisi
pineki
pinquana
pipkins
pippa
pippy
piroska
pita
pixy
pokii
polete
poli
polina
polly
pollyam
pollyanna
polyxena
pomaika'i
portia
posala
pragyata
prarthana
pratibha
preciosa
prema
premlata
presencia
presentación
presentaciÃ³n
presentacion
prisca
priscilla
priscylla
priya
protima
prudencia
prue
prunella
ptolema
pua
puakai
puakea
pualani
pukana
pulupaki
purificación
purificaciÃ³n
purificacion
purnima
puta
pyrrha
quah ah
quanda
quanna
queena
queenie
quenby
quenna
quentilla
querida
quilla
quinna
quintana
quintina
rÃ©gine
raanana
rabi'ah
rachael
rachav
rachel
racheline
rachelle
radha
radhiya
radinka
radmilla
radomira
radoslava
raeleen
rafya
raghda
régine
ragna
ragnhild
rahela
rai
raicheal
ra'idah
raiko
raina
raine
raisa
raizel
raja
rajalakshmi
rajani
rajata
rajnandini
rajya
ra'keisha
rakel
raku
ramaa
ramana
ramla
ramona
rana
randa
randelle
rane
rani
rania
ranielle
ranita
ranjana
ranya
raquel
raschelle
rasha
rasheda
rashida
rasia
rathnait
rati
ratri
ravenna
ravija
rawiya
rawni
raya
raylene
rayna
rayya
rebecca
rebeccanne
rebekah
rebekka
reena
reene
regan
regina
regine
reginy
rehema
rei
reichana
reina
reine
remaziah
ren
rena
renÃ©e
renada
renae
renée
renata
renee
renia
renita
rephaela
reseda
resi
reuma
reva
revaya
reveka
rexanne
rexella
reyna
rhea
rheanna
rhea silva
rheba
rhiannon
rhoda
rhode
rhon
rhonda
ria
rica
riccarda
richelle
rickena
ricki
rida
riesa
rihana
riju
rikki
riku
rikuyo
rimona
rina
rinatya
riona
risa
risha
rishona
rissa
rita
ritika
ritsa
ritzpah
riva
rivka
roanna
robena
roberta
robeta
robyn
rochelle
rocio
roderica
rohana
rohini
rois
roisin
roksana
rokuko
rolanda
romaine
romana
ronda
roniya
ronna
ronni
ros
rosa
rosabel
rosabella
rosalba
rosaleen
rosalia
rosalie
rosalind
rosalinda
rosaline
rosalyn
rosamaria
rosamond
rosamund
rosana
rosanne
rosarita
roschan
rose angel
roseanne
roselani
roselle
rose-marie
rosemere
roshanara
rosie
rosina
rosita
roslyn
rostislava
roswitha
rowena
rowyn
roxana
roxann
roxanna
roxanne
roxie
roxy
roz
roza
rozalia
rozele
rozene
rozsa
ruana
rubina
ruchi
ruchika
rudra
rufina
rukiya
rukmini
rumiko
rupal
ruperta
rupinder
ruqayya
rusalka
ruta
ruth
ruwaydah
ruzena
rya
ryba
sÃ¨arlait
saada
sèarlait
saba
sabah
sabella
sabetha
sabia
sabina
sabra
sabrina
sabriyya
sacajawae
sachi
sachiko
sade
sadella
sadie
sadira
sadzi
saed
saeed
safia
safiyya
sagara
sagitta
sahpooly
sai
saidah
saiphin
sakae
sakari
saki
sakura
sala
salali
salama
salamandrina
salena
salihah
sally
salma
saloma
sam
samantha
samara
sameh
samhaoir
samina
samjuana
samya
sana
sananda
sanchia
sandi
sandra
sandyha
sangita
saniyya
sanjana
santavana
santuzza
sanura
sanuye
sanya
sanyogita
sapata
sapphira
sara
sarada
sarafina
sarah
sarala
saraswati
sarat
saravanan
saril
sarita
sarma
saroja
sarojini
sarol
saronna
sasagu
saskia
sassacus
satinka
satoria
satoshi
satyarupa
sauda
saumitra
saura
savena
savina
savitri
sawa
sawni
scarlett
scenanki
schwanhild
searlait
sebastiana
secunda
seda
sedna
seiko
sekanina
sekelaga
seki
selda
selena
selene
selima
selina
selma
semeicha
septima
serafina
seraphina
seraphine
seren
serena
serita
seshadri
setepania
setsu
setsuko
shachariya
shafiqa
shahar
shahina
shahira
shahnaz
shaila
shaina
shakiyla
shakonda
shakti
shakuntala
shaleela
shalonda
shalonvia
shalvah
shalviya
shameena
shameika
shamika
shamira
shammara
shana
shanasa
shandra
shanee
shani
shaningo
shanique
shaniya
shanna
shannah
shanta
shantae
shantaina
shantal
shantelle
shanthi
shapira
sharada
sharai
sharama
sharanee
sharda
shari
sharifa
sharise
sharleen
sharlon
sharlotte
sharna
sharon
sharron
sharyl
shashi
shashibala
shashin
shasta
shauna
shaunda
shavonda
shawana
shawannah
shawna
shawnee
shayla
shayleen
shaynah
sheauga
sheela
sheena
sheherazade
sheila
sheilagh
sheilah
sheina
shekeda
shela
shelagh
shelavya
shelena
sheliya
shellie
shelly
shenandoah
shenna
sheraz
shereen
sheri
sheridan
sheridon
sherilyn
sheri lynn
sherri
sherrie
sherry
sheryl
shevon
shiela
shieryl
shifa
shifrah
shigeshi
shika
shimona
shina
shinji
shinya
shiow-chen
shira
shiree
shireen
shirell
shiri
shirin
shirleen
shirley
shirral
shizu
shizuko
shizuyo
shlay
shobha
shobhana
shona
shoshana
shoshannah
shoushan
shrilekha
shukura
shumana
shura
shuwani
shyama
shy-anne
shyla
sian
siani
siany
sibeal
sibelan
sibeta
sibila
sibongile
sibyl
sidony
sidra
siegfrida
sieghild
sierre
sigele
sigismonda
signa
signy
sigourney
sigrid
sigrun
sihu
siko
sile
silivia
silpe
silvana
silvia
simi
simona
simone
simplicia
sinako
sindy
sinead
sineenuch
sinopa
siobhan
sioned
siri
sisi
sisika
sisley
sissey
sissie
sissy
sita
sitala
siti
situla
siu
slaine
slyvia
slyvie
sobeslava
socorra
sofi
sofronia
solana
solange
soledad
solimar
solveig
soma
sommer
sona
sonal
sondra
sondya
sonel
sonia
sonja
sonje
sonya
sooketoo
sook-joo
soon-bok
sopheary
sophia
sophie
sophronia
sophy
sora
sorcha
soreka
sorel
sorrel
soshannah
speranza
spica
sree
sri
sriram
srivatsan
stacey
staci
stacia
stacie
stacy
stanislava
stef
stefana
stefania
stefanie
steffie
steffy
stellara
steph
stephÃ¡na
stephana
stephána
stephania
stephanie
stesha
stina
subira
sudarshana
sudhakara
sue
suela
sugi
suhailah
sujata
suji
sukhtej
sukie
suky
sula
sulakhna
suleika
suleima
suleta
suma
sumiko
sunah
sunayana
sundari
sun-hi
sunil
sunita
sunniva
suny
suragana
surata
suraya
surendra
suri
surina
surya
susan
susana
susanna
susannah
susanne
suse
sushanti
sushobhana
susie
sutki
suzamni
suzanna
suzannah
suzanne
suzetta
suzie
suzu
suzuki
suzume
suzy
svanhild
svanni
svea
sveta
svetla
svetlana
swanhilda
swarup
sybil
sybilla
sybille
sydnie
syeira
syenna
sylva
sylvana
sylvia
syona
tabatha
tabby
tabia
tabita
tabitha
taci
tadewi
tadita
taegan
taghrid
tahanee
tahcawin
tahirah
tahiyya
taima
taipa
taisiya
taiwo
tajuana
takala
takayren
takeko
takenya
takiyah
tala
talasi
talaya
taletta
talia
taliba
talisa
talise
talitha
tallie
tallou
tallula
tallulah
talma
talula
talulla
talya
tama
tamah
tamaki
tamako
tamaleni
tamanna
tamara
tamary
tamayo
tami
tamica
tamika
tamiko
tamineh
tammi
tammie
tammy
tamohara
tamrika
tamsin
tamson
tamzen
tané
tanÃ©
t'anay
tanaya
tane
taneisha
tanesha
taneshea
tania
tanicha
taniesha
tanisha
tanith
tannishtha
tansy
tanvi
tanya
tapasya
tara
taral
taralynn
tarana
tarani
taravia
tareen
taria
tarika
tarja
tarla
tarunika
taryn
tasarla
tasha
tashanee
tashina
tasida
tasina
tasmin
tasnima
tassos
tasya
tatiana
taulaki
taura
tavi
tawia
tawnie
tayanita
tazu
tcu mana
teamhair
teasag
teda
teddi
tedra
teena
tegwen
tekahionwake
tekla
teleri
teleza
temina
temira
temyka
tenecia
tenisha
tenuvah
teodora
tephania
tera
teresa
teresia
teresina
teresita
teressa
tereza
terezinha
teri
teriah
terilee
terra
terri
terryl
teryn
teshuah
tesia
tess
tessa
tessi
tevy
thaddea
thais
thalassa
thaleia
thana '
thandiwe
thao
thea
thekla
thelma
thema
themba
thena
theodora
theodosia
theone
theophania
theophilia
theresa
thetis
thomasina
thongvan
thurayya
thyra
tia
tiara
tiberia
tifara
tiff
tiffany
tilda
till
timotha
timothea
tina
tiponya
tira
tirion
tirtha
tirza
tirzah
tisa
tish
tisha
tishra
titia
titilayo
tivian
tivona
tiwa
tobe
tohuia
toini
toireasa
toiresa
toivo
toletta
tolga
tolikna
tomasa
tomazja
tomina
toni
tonja
tonya
tooka
tookayo
tora
torah
torhild
tori
toril
toshala
toshi
tosia
toski
tosya
totsi
tovia
trÃ­ona
tracee
tracey
traci
tracie
tracy
tríona
trava
trecia
treise
trella
tresa
tresha
tresiliana
tri
tria
tricia
trina
trinh
trini
triona
tripta
trish
trisha
triska
trista
trix
trixie
truda
trudie
trudy
tsomah
tsuhgu
tsula
tsunou
tsuruko
tua
tualau
tuhina
tukiko
tukiyo
tula
tulani
tulann
tulia
tulinagwe
tulsi
tupper
tusa
tusajigwe
tusla
tuyet
twyla
tyana
tyche
tyfany
tyffany
tyna
tyra
tyrene
tzadika
tzafra
tzahala
tzeira
tzemicha
tzeviya
tzigana
tzili
tzivya
tzofia
uchenna
udiya
ujala
ujila
ujvala
ula
ulami
ularia
ulina
ulla
ulrika
ulrike
ulryka
ulu
ulyssia
uma
umali
umayma
ume
umeeka
umeki
umeko
umiko
um-kalthum
umm
umniya
una
undine
uness
unice
unn
unquie
upala
urania
uranja
urbi
uriela
urmi
ursa
ursel
ursley
ursola
ursula
ursulina
ursy
urszula
uschi
usha
ushi
ushmil
ushriya
ut
uta
utako
ute
utina
uvonda
uwimana
vÃ¡clava
vachya
vaclava
václava
vailea
valaree
valda
valdis
vale
valeda
valenda
valentia
valentina
valeria
valerie
valeriya
valery
valeska
valetta
valida
valinda
valli
vally
valma
valora
valory
vamana
vana
vanaja
vanalika
vanda
vandani
vandelia
vanessa
vani
vania
vanika
vanja
vanna
vanora
vanya
vara
varana
varaza
varenka
varina
varinka
varonika
varsha
varuna
varvara
vashti
vasilisa
vasundhara
vatusia
veata
veda
vedis
veera
vega
vegenia
velda
veleslava
velia
velinda
velinde
velma
velora
velsie
velvina
venceslava
veneranda
venessa
veola
vera
verena
verify
verina
verla
verna
vernadine
vernesta
vernetta
veronica
veronika
veronique
vesta
vevina
vi
vianca
vianna
viatricia
viatrix
vica
vicki
vickie
vicky
victoire
victorine
victoriya
vidonia
vidya
viera
vigdis
vik
vika
vikaheilala
viki
vikkie
vikky
viktoria
vilhelmina
vilma
vimala
vina
vincenta
vinette
vinya
viola
violante
viole
violeta
violetta
viorica
vira
virgee
virginie
viridia
visolela
vita
vitoria
vittoria
viv
vivaca
viveca
viveka
vivian
viviana
vivienne
vivita
vivyan
vladimÃ­ra
vladimíra
vladimira
vladislava
vonda
vondila
vreni
vrijeda
vrinda
vyoma
vyomika
vyvian
wachiwi
wafa
wafiyya
wahchintonka
waipshwa
wajiha
wakana
wakanda
wakenda
walentya
walida
walidah
waltraud
wana'ao
wana'aonani
wanaka
wanda
waneta
wanita
wapin '
warri
waseme
washta
wasula
watseka
wauna
waylahskise
waynoka
weayaya
weeko
weetamoo
wehinahpay
wenda
wendeline
wendi
wendie
wendy
wenona
wenonah
weronikia
whoopi
wibeke
wicahpi
wicahpi isnala
wicahpi wakan
wichasta
widad
wiebke
wigburg
wihakayda
wiktoria
wilfreda
wilhema
wilhemina
wilhemine
wilima
wilimina
willa
willabelle
willamena
willamina
willann
willemyn
willeta
willette
wilma
winda
winema
winifred
winnie
winnie-comac
winnifred
winona
wioletta
wisia
witashnah
wiyaka-wastewin
wyanet
wyetta
wylma
wyn
wynelle
wynn
wynne
wynonna
wyome
wyvonne
xandra
xandrine
xanthe
xantho
xaviera
xena
xenia
xiao-niao
xiao-xing
xilonen
ximena
xin
xinh
xiopara
xuan
xylia
yí
yaa
yÃ­
yÃ­n
yaara
yachi
yachne
yackie
yael
yakira
yaluta
yamina
yamini
yamka
yamuna
yín
yana
yanaha
yardena
yardeniya
yarkona
yarmilla
yashila
yashna
yashodhara
yashwina
yasiman
yasmeen
yasmin
yasmine
yasu
yasuko
yawa
yehudit
yejide
yekaterina
yelda
yelena
yemima
yemina
yendelela
yenene
yenta
yepa
yerusha
yeshara
yetta
yeva
yevetha
yi
yin
ynes
ynez
yochana
yocheved
yoela
yoki
yokkako
yoko
yolanda
yolande
yolanta
yolathe
yolette
yolyvette
yonina
yonkela
yori
yosefa
yoshe
yoshi
yoshiko
yoshino
young-il
young-soon
yovela
yow
yoya
yrenia
ysabel
ysanne
yseult
ysolda
ysonde
yu
yuè
yuÃ¨
yue
yukari
yuki
yukie
yukiko
yuliya
yumiko
yunlong
yusra
yvette
yvonne
zÃ©phyrine
zÃ n
zabrina
zada
zadee
zafira
zahara
zahra
zahrah
zainab
zainabu
zaira
zakah
zakelina
zakiya
zakiyya
zaleya
zalika
zaltana
zandra
zaneda
zaneta
zanna
zannah
zéphyrine
zara
zarah
zaray
zarifa
zarina
zarita
zarya
zawadi
zayit
zaylie
zaynab
zaza
zàn
zbyhnÃªva
zbyhnêva
zbyhneva
zdeslava
zea
zeborah
zefiryn
zehara
zehava
zehira
zel
zelda
zelenka
zelfa
zelia
zelie
zelma
zelpah
zemira
zemorah
zena
zenaida
zenaide
zenana
zenda
zenevieva
zenobia
zenobja
zephyra
zephyrine
zera
zeraldina
zerdali
zeresh
zevida
zhì
zhÃ¬
zhané
zhanÃ©
zhane
zhenjian
zhi
zia
zigana
zihna
zil
zillah
zilpah
zilpha
zilvia
zimriah
zina
zinaida
zinnia
zinobiya
zinovia
zipporah
ziracuny
zirah
zita
zitkala-sa
zitomÃ­ra
zitomíra
zitomira
zivanka
zlata
zoë
zoÃ«
zoe
zofia
zofie
zoheret
zohra
zoila
zola
zonta
zora
zoraida
zorina
zosia
zozi
zsazsa
zsa zsa
zsuzsÃ¡nna
zsuzsanna
zsuzsánna
zubaida
zubaidah
zula
zuleica
zuleika
zuljeta
zuwena
zuzana
zuzanna
zuzela
zuzeth
zuzi
zuzu
zytka
lousewies
meera
salayha
lexie
lauren
brooke
ashley
morgan
jacquelyn
ashlee
halli
meagan
maraiah
caitlyn
suriya
annaka
anneka
rainie
matti
mattie
maddie
lyndsey
kelsie
kelsey
carie
araya
kelly
brielle
shelby
lacey
katey
maddy
jessie
