# Supplementary material for: ScholarLens: extracting competences from research publications for the automatic generation of semantic user profiles
Source: PeerJ journal article supplement (doi:10.7717/peerj-cs.121), 2017-07-03
Supplement: Pipeline.zip [file Pipeline.zip › Pipeline/gate/plugins/ANNIE/resources/gazetteer/person_female_lower_ambig.lst]

abbey:kind=ambig
acacia:kind=ambig
adorable:kind=ambig
aka:kind=ambig
alba:kind=ambig
allie:kind=ambig
ally:kind=ambig
alpha:kind=ambig
amber:kind=ambig
ambrosia:kind=ambig
amethyst:kind=ambig
anatolia:kind=ambig
andromeda:kind=ambig
anemone:kind=ambig
angel:kind=ambig
apple:kind=ambig
aran:kind=ambig
aurora:kind=ambig
autumn:kind=ambig
bambi:kind=ambig
bat:kind=ambig
bella:kind=ambig
bet:kind=ambig
bliss:kind=ambig
brandy:kind=ambig
brittany:kind=ambig
bunny:kind=ambig
candy:kind=ambig
cat:kind=ambig
charisma:kind=ambig
charity:kind=ambig
chastity:kind=ambig
chelsea:kind=ambig
cherry:kind=ambig
cinnamon:kind=ambig
clare:kind=ambig
coral:kind=ambig
corn:kind=ambig
corona:kind=ambig
crystal:kind=ambig
daffodil:kind=ambig
dahlia:kind=ambig
daisy:kind=ambig
dixie:kind=ambig
domino:kind=ambig
ebony:kind=ambig
eireann:kind=ambig
emerald:kind=ambig
faith:kind=ambig
fang:kind=ambig
fawn:kind=ambig
fedora:kind=ambig
filipina:kind=ambig
florence:kind=ambig
flower:kind=ambig
gala:kind=ambig
gale:kind=ambig
gay:kind=ambig
gazelle:kind=ambig
georgia:kind=ambig
gin:kind=ambig
ginger:kind=ambig
glory:kind=ambig
grace:kind=ambig
gypsy:kind=ambig
halcyon:kind=ambig
hang:kind=ambig
harmony:kind=ambig
hazel:kind=ambig
heather:kind=ambig
hind:kind=ambig
honour:kind=ambig
hue:kind=ambig
hyacinth:kind=ambig
io:kind=ambig
ira:kind=ambig
iris:kind=ambig
isa:kind=ambig
jade:kind=ambig
jain:kind=ambig
jan:kind=ambig
jasmine:kind=ambig
jellybean:kind=ambig
joy:kind=ambig
june:kind=ambig
karma:kind=ambig
kes:kind=ambig
kitty:kind=ambig
lark:kind=ambig
lily:kind=ambig
luna:kind=ambig
lute:kind=ambig
mama:kind=ambig
margarita:kind=ambig
margherita:kind=ambig
mead:kind=ambig
meadow:kind=ambig
melody:kind=ambig
mercy:kind=ambig
merry:kind=ambig
misty:kind=ambig
nan:kind=ambig
ode:kind=ambig
olive:kind=ambig
olympia:kind=ambig
opal:kind=ambig
pansy:kind=ambig
pat:kind=ambig
patience:kind=ambig
pearl:kind=ambig
pebbles:kind=ambig
peg:kind=ambig
penny:kind=ambig
pepper:kind=ambig
peta:kind=ambig
pocahontas:kind=ambig
poppy:kind=ambig
prairie:kind=ambig
primrose:kind=ambig
prudence:kind=ambig
psyche:kind=ambig
queen:kind=ambig
rose:kind=ambig
rosemary:kind=ambig
rosetta:kind=ambig
ruby:kind=ambig
sable:kind=ambig
saga:kind=ambig
sage:kind=ambig
sahara:kind=ambig
sapphire:kind=ambig
sari:kind=ambig
savannah:kind=ambig
scarlet:kind=ambig
scout:kind=ambig
serenity:kind=ambig
sheba:kind=ambig
sierra:kind=ambig
sky:kind=ambig
skye:kind=ambig
sloan:kind=ambig
socks:kind=ambig
soliel:kind=ambig
stella:kind=ambig
stormy:kind=ambig
summer:kind=ambig
sung:kind=ambig
sunshine:kind=ambig
tab:kind=ambig
tally:kind=ambig
tawny:kind=ambig
taylor:kind=ambig
teal:kind=ambig
teddie:kind=ambig
tempest:kind=ambig
tigris:kind=ambig
treasure:kind=ambig
trinidad:kind=ambig
tulip:kind=ambig
velvet:kind=ambig
venetia:kind=ambig
venus:kind=ambig
verity:kind=ambig
victoria:kind=ambig
violet:kind=ambig
virginia:kind=ambig
willow:kind=ambig
warri:kind=ambig
rain:kind=ambig
unity:kind=ambig
lei:kind=ambig
carry:kind=ambig
