# Supplementary material for: ScholarLens: extracting competences from research publications for the automatic generation of semantic user profiles
Source: PeerJ journal article supplement (doi:10.7717/peerj-cs.121), 2017-07-03
Supplement: Pipeline.zip [file Pipeline.zip › Pipeline/gate/plugins/ANNIE/resources/gazetteer/person_male_ambig.lst]

Abbot:kind=ambig
Archer:kind=ambig
Art:kind=ambig
Ash:kind=ambig
Austin:kind=ambig
Bane:kind=ambig
Baron:kind=ambig
Basil:kind=ambig
Beau:kind=ambig
Bent:kind=ambig
Bentley:kind=ambig
Bing:kind=ambig
Borg:kind=ambig
Brand:kind=ambig
Brent:kind=ambig
Cam:kind=ambig
Cesar:kind=ambig
Chad:kind=ambig
Chretien:kind=ambig
Christian:kind=ambig
Chuck:kind=ambig
Clark:kind=ambig
Clay:kind=ambig
Clerk:kind=ambig
Cliff:kind=ambig
Clyde:kind=ambig
Cosmo:kind=ambig
Dale:kind=ambig
Darling:kind=ambig
Dean:kind=ambig
Devon:kind=ambig
Dew:kind=ambig
Dick:kind=ambig
Dodge:kind=ambig
Don:kind=ambig
Drake:kind=ambig
Drew:kind=ambig
Dud:kind=ambig
Dude:kind=ambig
Duff:kind=ambig
Dug:kind=ambig
Duke:kind=ambig
Dunk:kind=ambig
Earl:kind=ambig
Egg:kind=ambig
Faber:kind=ambig
Fabian:kind=ambig
Ferris:kind=ambig
Fin:kind=ambig
Fletcher:kind=ambig
Forester:kind=ambig
Fountain:kind=ambig
Frank:kind=ambig
Garnet:kind=ambig
Gorgeous:kind=ambig
Gram:kind=ambig
Grant:kind=ambig
Gray:kind=ambig
Griffin:kind=ambig
Grove:kind=ambig
Gun:kind=ambig
Gunner:kind=ambig
Guy:kind=ambig
Halley:kind=ambig
Ham:kind=ambig
Heath:kind=ambig
Heinz:kind=ambig
Herb:kind=ambig
Hero:kind=ambig
Heron:kind=ambig
Hood:kind=ambig
Hoop:kind=ambig
Hudson:kind=ambig
Hung:kind=ambig
Hunter:kind=ambig
Hutch:kind=ambig
Irvine:kind=ambig
Jarvis:kind=ambig
Jock:kind=ambig
Jordan:kind=ambig
Kale:kind=ambig
Kelvin:kind=ambig
Kent:kind=ambig
Lance:kind=ambig
Leaf:kind=ambig
Lee:kind=ambig
Lefty:kind=ambig
Leo:kind=ambig
Levy:kind=ambig
Lincoln:kind=ambig
Mark:kind=ambig
Marsh:kind=ambig
Marshal:kind=ambig
Mat:kind=ambig
Max:kind=ambig
Maxim:kind=ambig
Mayo:kind=ambig
Mic:kind=ambig
Morris:kind=ambig
Morse:kind=ambig
Mort:kind=ambig
Natty:kind=ambig
Neptune:kind=ambig
Nod:kind=ambig
Noel:kind=ambig
Norm:kind=ambig
Norman:kind=ambig
Orion:kind=ambig
Oscar:kind=ambig
Ottoman:kind=ambig
Paddington:kind=ambig
Philander:kind=ambig
Pierce:kind=ambig
Rag:kind=ambig
Reed:kind=ambig
Rich:kind=ambig
Roar:kind=ambig
Rocky:kind=ambig
Rod:kind=ambig
Romance:kind=ambig
Royale:kind=ambig
Rusty:kind=ambig
Scot:kind=ambig
Silver:kind=ambig
Shin:kind=ambig
Sim:kind=ambig
Slade:kind=ambig
Steward:kind=ambig
Sultan:kind=ambig
Tad:kind=ambig
Tate:kind=ambig
Teddy:kind=ambig
Telly:kind=ambig
Than:kind=ambig
Tor:kind=ambig
Trent:kind=ambig
Troy:kind=ambig
Urban:kind=ambig
Uzi:kind=ambig
Van:kind=ambig
Victor:kind=ambig
Weed:kind=ambig
Will:kind=ambig
Winter:kind=ambig
Wolf:kind=ambig
Wood:kind=ambig
Yale:kind=ambig
Yen:kind=ambig
Miles:kind=ambig
Scooter:kind=ambig
Al:kind=ambig
Franc:kind=ambig
Bill:kind=ambig
Peers:kind=ambig
