# Supplementary material for: ScholarLens: extracting competences from research publications for the automatic generation of semantic user profiles
Source: PeerJ journal article supplement (doi:10.7717/peerj-cs.121), 2017-07-03
Supplement: Pipeline.zip [file Pipeline.zip › Pipeline/gate/plugins/ANNIE/resources/gazetteer/person_male_cap.lst]

AAREN
AARON
ABBE
ABDEL
ABDUL
ABDULLA
ABDULLAH
ABE
ABEL
ABHISHEK
ABHNER
ABINASH
ABNER
ABRAHAM
ABRAM
ABRASAX
ABSALOM
ACAR
ACAYIB
ACHILLES
ACHMAD
ACTON
ADAIR
ADAL
ADALBERT
ADALIAH
ADAM
ADAR
ADEL
ADEMOLA
ADEN
ADHAMH
ADIGUN
ADIL
ADIN
ADIR
ADIV
ADLAI
ADLER
ADLI
ADMON
ADNI
ADOLF
ADOLPH
ADOLPHO
ADOLPHUS
ADOM
ADON
ADOR
ADRI
ADRIAN
ADRIEN
AEGRI
AENEAS
AENGUS
AERON
AFFONSO
AGATHON
AGLER
AGNI
AGUSTEK
AGUSTIN
AHANU
AHARON
AHDIK
AHIL
AHIR
AHMAD
AHMED
AHMIK
AHREN
AIDAN
AJANI
AJAY
AJIT
AKANDO
AKAR
AKHIL
AKIKO
AKIL
AKIM
AKIO
AKIRA
AKULE
AL
ALA
ALAIN
ALAN
ALAND
ALARIC
ALASDAIR
ALASTAIR
ALASTER
ALBAN
ALBERT
ALBERTO
ALBIE
ALBIN
ALBRECHT
ALBY
ALDEN
ALDER
ALDIS
ALDO
ALDOUS
ALDY
ALEC
ALED
ALEIN
ALEJANDRO
ALEK
ALEKSANDER
ALEKSANDR
ALESER
ALESSANDRO
ALEX
ALEXANDER
ALEXANDR
ALEXANDRE
ALF
ALFERRAL
ALFONSE
ALFONSO
ALFRED
ALFREDO
ALFWINE
ALGAR
ALGERNON
AL-HAMRA
ALHIM
ALI
ALICK
ALIM
ALIPHONT
ALISTAIR
ALISTAR
ALISTER
ALIX
ALLAN
ALLEN
ALMERIC
ALMON
ALNATH
ALOIS
ALOK
ALON
ALONSO
ALOYSIUS
ALPHONSE
ALPO
ALRIK
ALROY
ALTAIR
ALTER
ALTON
ALVAR
ALVERTOS
ALVIN
ALVIS
ALWIN
ALWYN
ALYN
AMADEO
AMADEUS
AMADIS
AMADO
AMAL
AMANDO
AMAR
AMARDAD
AMBROSE
AMEER
AMENI
AMIEL
AMILCAR
AMIN
AMIR
AMIT
AMLAN
AMON
AMOS
AMRE
ANACLETO
ANAND
ANATOLE
ANDERS
ANDERSON
ANDRÃ©S
ANDRAS
ANDRéS
ANDRE
ANDREAS
ANDREI
ANDREJ
ANDRES
ANDREW
ANDRIQUE
ANDRIS
ANDR??S
ANDR?S
ANDRZEJ
ANDY
ANESTES
ANEURIN
ANGELO
ANGHARED
ANGUS
ANIBAL
ANIOL
ANKA
ANNAN
ANSELM
ANSGAR
ANTHONY
ANTOINE
ANTON
ANTONIO
ANTONY
ANURAG
ANZHEL
AODH
APENIMON
APOLLONIOS
AQUILES
ARCHIBALD
ARCHIE
ARCY
ARDEN
ARDON
AREN
ARES
ARI
ARIAN
ARIES
ARISTIDE
ARKADI
ARKADY
ARKELL
ARKIN
ARLEY
ARMAN
ARMAND
ARMANDO
ARMANTI
ARMIN
ARMON
ARMONDO
ARNE
ARNIE
ARNOLD
ARON
ARPAD
ARRI
ARSLAN
ARTE
ARTHUR
ARTHURO
ARTIN
ARTUR
ARTURO
ARUN
ARVID
ASHER
ASHLIN
ASHTAD
ASHTON
ASHUR
ASIF
ASKER
ASTEVEAN
ASTOR
ATAL
ATHEEL
ATHOL
ATMAN
ATSUHIKO
ATSUSHI
ATTILA
AUBERON
AUBERT
AUDLEY
AUDREY
AUDRIC
AUDVARD
AUGIE
AUGUSTIN
AUGUSTUS
AUREK
AURELIUS
AVEDIG
AVEL
AVERIL
AVI
AVRAHAM
AXEL
AYAZ
AYLWIN
AZAD
AZFAR
AZI
AZUKA
BAHMAN
BAKR
BAL
BALDRIC
BALDWIN
BALFOUR
BALTAZAR
BALTHAZAR
BALTO
BANA-BARNA
BARDO
BARDON
BARNABAS
BARNABY
BARNARD
BARNEY
BARNIE
BARRET
BARRON
BARRY
BART
BARTEK
BARTHOLO
BARTHOLOMEW
BARTHOLOMIEU
BARTLOMIEJ
BARTOLOMIY
BARTON
BARTOSZ
BARTRAM
BASHAM
BASILIO
BASTIAN
BASTIEN
BAUDOUIN
BAUL
BAVOL
BAYLEY
BEAUMONT
BEAUREGARD
BECHTEL
BECK
BEDRICH
BEHRAM
BELDON
BELLO
BELTRAN
BEM
BEMOSSED
BEN
BENEDICT
BENJAMIN
BENJI
BENNETT
BENNIE
BENNO
BENNY
BENOIT
BEREK
BERGREN
BERHAN
BERK
BERNABE
BERNAL
BERNARD
BERND
BERNHARD
BERNIE
BERT
BERTIN
BERTOK
BERTRAM
BERTRAND
BEVIS
BHALTAIR
BHANU
BHAVEN
BHEKI
BIALY
BILAL
BILDAD
BILL
BILLY
BILY
BINYONG
BIPIN
BJÃ¶RN
BJöRN
BJOERN
BJORN
BJORNE
BJ??RN
BJ?RN
BLAIR
BLAISE
BLAZEJ
BO
BOAZ
BOB
BOBA
BOBUSH
BODAWAY
BODDU
BODI
BODOG
BOGDAN
BOGUMIL
BOGUSLAW
BOHDAN
BOLESLAW
BONITO
BOR
BORGHILD
BORIA
BORIS
BORISLAV
BOTAN
BOUR
BOWLE
BOWMAN
BOYCE
BOYD
BOZ
BOZYDAR
BRADBURN
BRADEN
BRADLEE
BRADLEY
BRADSHAW
BRAD
BRAHMA
BRAM
BRANDAN
BRANDEIS
BRANDON
BRANDT
BRANNON
BRAYDEN
BRENCIS
BRENDAN
BRENDON
BRENTON
BRET
BRIAN
BRICE
BRIDGER
BRITTON
BROC
BROCK
BRODERICK
BRODNEY
BRODY
BRONISLAW
BRONSON
BRONTE
BROWN
BROWNING
BRUCE
BRUIN
BRUNO
BRUNS
BRYAN
BRYANT
BRYCE
BRYNE
BRYRONY
BUCK
BUCKMINSTER
BUCKY
BUD
BURIAN
BURKHARD
BURNE
BURR
BURT
BURTON
BYRN
BYRNE
BYRON
CADDY
CADEL
CADEN
CADFAEL
CADWALLADER
CAHIL
CAIN
CAISEAL
CAIUS
CAL
CALDER
CALEB
CALLUM
CALO
CALUM
CALUT
CALV
CALVIN
CAMERINO
CAMERON
CAMLO
CAMPBELL
CAMRON
CANTON
CANUTE
CAPPI
CAREW
CARL
CARLE
CARLETON
CARLO
CARLOS
CARLTON
CARLUCHO
CARMIT
CARSON
CARSWELL
CARTER
CARVEL
CASHEL
CASIMIR
CASPAR
CASPER
CASTEL
CASTOR
CATALIN
CATHOL
CEARBHALL
CEBASTIAN
CECIL
CEDRIC
CELYN
CEMAL
CESLOVAS
CHAIM
CHAIWAT
CHAL
CHANDLER
CHANE
CHANEY
CHANNING
CHARLES
CHARLEY
CHARLTON
CHASESTON
CHAUNCEY
CHAUNCY
CHAUVIN
CHAVALIT
CHAY
CHAZ
CHE
CHEN
CHESLAV
CHESLEY
CHESMU
CHET
CHI
CHIAH
CHICK
CHICO
CHIK
CHIOKE
CHIP
CHOU
CHRIS
CHRISTAO
CHRISTOPH
CHRISTOPHE
CHRISTOPHER
CHUCKY
CHUNG
CIARAN
CICERO
CID
CIRILL
CISCO
CLADIO
CLAES
CLANCY
CLARENCE
CLARKE
CLAUD
CLAUDE
CLAUDIO
CLAUDIUS
CLAUS
CLAYTON
CLEANTH
CLEM
CLEMENS
CLEMENT
CLEMENTE
CLETES
CLETO
CLEVONNE
CLIFFORD
CLIFFY
CLIFTON
CLINT
CLINTON
CLIVE
CNUT
COINNEACH
COLBY
COLE
COLEMAN
COLIN
COLLIN
COLMAN
COLON
COLTER
COLTON
COLUMBA
CONAN
CONLETH
CONNOR
CONRAD
CONSTANTIN
CONSTANTINE
CONSTANTINOS
COOPER
CORBIN
CORDELL
CORIN
CORKY
CORMAC
CORNELIUS
CORT
CORWIN
COURTNEY
CRAIG
CRISPIAN
CRISPIN
CRISPUS
CRISTIAN
CRISTOBAL
CULLEN
CURCIO
CURT
CURTIS
CUTHBERT
CY
CYREK
CYRIL
CYRILL
CYRUS
CZCIBOR
CZESLAW
DABID
DABNEY
DAFYDD
DAFYYD
DAG
DAGWOOD
DAIN
DAL
DALAL
DALEY
DALI
DALTON
DAMEK
DAMIAN
DAMIEN
DAMON
DAN
DANDY
DANE
DANIEL
DANIELEK
DANIIL
DANKO
DANNE
DANNIE
DANNY
DANTE
DANYLKO
DANYON
D'ARCY
DARDEN
DAREO
DARIEN
DARIN
DARIUS
DARL
DARLIN
DARRELL
DARREN
DARRYL
DARYL
DARYLE
DAT
DAVE
DAVID
DAVIDDE
DAVIDEK
DAVIS
DAVON
DAWAYNE
DAWID
DAWSON
DEANE
DECKER
DECLAN
DEDERICK
DEEMER
DEEPAK
DEEPESH
DEL
DELANO
DELBERT
DELL
DELMAR
DEL MAR
DELMORE
DEMETRIUS
DEMOTHI
DEMYAN
DEN
DENE
DENES
DENHOLM
DENIS
DENIZ
DENNIS
DENNY
DENTON
DENYS
DENZEL
DENZIL
DEON
DEREK
DERIK
DERMOT
DERREK
DERRICK
DES
DESMOND
DEVEN
DEWEY
DEWITT
DEX
DEXTER
DICHALI
DICKENS
DICKIE
DICKSON
DICKY
DICTA
DIEDERICH
DIEDERICK
DIEGO
DIERK
DIETER
DIETMAR
DIETRICH
DIGBY
DIGGORY
DIGLIO
DILBERT
DILLON
DILLWYN
DILWYN
DIMITRI
DIMO
DINO
DIODORE
DION
DIONYS
DIREK
DIRK
DIXON
DMITRI
DMITRIY
DOB
DOBBS
DOBIE
DOBROGOST
DOBROMIL
DOBRY
DOBY
DOLAN
DOLF
DOLPH
DOM
DOMINGO
DOMINIC
DOMINIK
DONAHUE
DONALD
DONALDO
DONALT
DONARD
DONATO
DONLEY
DONNELL
DONNELLY
DONNIE
DONOHUE
DONOVAN
DONOVON
DORIAN
DORRELL
DOUG
DOUGIE
DOUGLAS
DOUGLASS
DOYLE
DRACHEN
DRAGOS
DRAYTON
DRISCOLL
DRISKOLL
DRU
DRYSTAN
DUANE
DUDDLEY
DUDLEY
DUIG
DUKARAI
DUMAKA
DUMAN
DUNC
DUNCAN
DUNHAM
DUNSTAN
DURAN
DURAND
DURRIKEN
DURRIL
DURWARD
DUSTEN
DUSTIN
DUY
DWAIN
DWANE
DWAYNE
DWIGHT
DYAMI
DYL
DYLAN
DYLANNE
DYRE
DZETINS
EAMON
EAMONN
EANRUIG
EARNEST
EBENEZER
EBERHARD
EBERT
EBERTO
ECK
ECKBERT
ECKERD
ECKERT
ECKHARD
ED
EDDIE
EDDY
EDGAR
EDGARS
EDISON
EDKO
EDLIN
EDMON
EDMOND
EDMUND
EDMUNDSON
EDO
EDRIC
EDUARD
EDUARDO
EDWARD
EDWIN
EDZKO
EFIM
EFRAIM
EGBERT
EGOR
EIKE
EILWYN
EINAR
EIRAN
EKKEHARDT
ELBERT
ELDAD
ELDEN
ELDON
ELDRED
ELDRIDGE
ELEK
ELEMAR
ELFRED
ELIAS
ELIJAH
ELIMELECH
ELISHA
ELKI
ELLIOT
ELLIS
ELLWOOD
ELMAR
ELMER
ELMO
ELOF
ELOY
ELRAD
ELRIC
ELROY
ELSU
ELTON
ELVIS
ELWIN
ELWOOD
ELY
EMAN
EMANUEL
EMERSON
EMERY
EMIDIO
EMIL
EMILE
EMILIO
EMILS
EMLYN
EMMANUEL
EMMET
EMMETT
EMMITT
EMOK
EMORY
EMRYS
ENEAS
ENGEL
ENLI
ENNIO
ENOCH
ENOS
ENRICO
ENRIQUE
ENYETO
EOIN
EPHRAIM
ERASMUS
ERBERTO
EREK
ERHARD
ERI
ERIC
ERICH
ERICK
ERICO
ERIK
ERLE
ERNEST
ERNESTO
ERNIE
ERNST
ERROL
ERSKIN
ERVIN
ERWIN
ESHKOL
ESMOND
ESPIRIDION
ESRA
ESSIEN
ESTAVAN
ESTEBAN
ESTIFANO
ESTIVIDO
ETAN
ETHAN
ETHMER
ETU
EUGENE
EUGENIO
EUSTACE
EV
EVAN
EVANDER
EVERARDO
EVERETT
EVERHARD
EVERT
EZAR
EZEKIEL
EZER
EZHNO
EZRA
FABIO
FABRICE
FAIRLEIGH
FAISAL
FAIZ
FAIZEL
FAN
FARRELL
FARRIS
FARUK
FAXON
FAYETTE
FEDOR
FEHMI
FELICE
FELICIANO
FELIKE
FELIKS
FELINO
FELIP
FELIPE
FELIPPE
FELIX
FEODOR
FERDINAND
FERGHUS
FERGUS
FERGUSON
FERIS
FERMI
FERMIN
FERNANDO
FESS
FESTUS
FIDEL
FIDO
FILANDER
FILIP
FILIPPO
FINBAR
FINEAS
FINGAL
FINLAY
FINLEY
FINN
FION
FISK
FLETCH
FLINT
FLIP
FLORIAN
FLOYD
FLYNN
FONZ
FONZIE
FORESTER
FORREST
FORRESTER
FOSS
FOSTER
FOTIOS
FOUNT
FRANC
FRANCESCO
FRANCHOT
FRANCISCO
FRANCO
FRANCOIS
FRANKIE
FRANKLIN
FRANKO
FRANKY
FRANS
FRANSISC
FRANZ
FRASER
FRASIER
FRAVARDIN
FRED
FREDDIE
FREDDY
FREDERICH
FREDERICK
FREDI
FREDRIK
FRIEDHELM
FRIEDHOLD
FRIEDRICH
FRIGYES
FRITS
FRITZ
FRODE
FULTON
FYNN
FYODOR
GABE
GABRIEL
GAHIJI
GAIUS
GALEN
GALLARD
GALLOWAY
GALT
GAMALIEL
GAR
GARDNER
GAREK
GARETH
GARFIELD
GARNER
GARRET
GARRETH
GARRETT
GARRICK
GARRY
GARTH
GARY
GASPAR
GAUDI
GAUTAM
GAUTHIER
GAUTIER
GAV
GAVEN
GAVIN
GAWAIN
GAWAYNE
GAYLER
GAYLOR
GAYLORD
GAZZA
GEBHARD
GEERT
GEFFREY
GELLERT
GELO
GENE
GENNARO
GENO
GEOFF
GEOFFREY
GEOFFROI
GEOFFROY
GEORDIE
GEORG
GEORGE
GEORGES
GEORGI
GEORGY
GER
GERALD
GERALDO
GERARD
GERARDO
GERAUD
GERBEN
GEREK
GERHARD
GERIK
GERMAIN
GERNOT
GEROLD
GEROME
GERONIMO
GERONTIUS
GERRIE
GERRY
GERT
GERTIE
GERVAISE
GERWULF
GEYO
GHEORGHE
GIACOMO
GIAMO
GIANNES
GIANNI
GIANNINI
GIDE
GIDEON
GIDON
GIERMO
GIL
GILBERT
GILES
GILLESPIE
GILLIAM
GILLIS
GIOTTO
GIOVANNI
GIRAUD
GIROLAMO
GITTA
GIULIANO
GIUSEPPE
GIUSTO
GLEN
GLYN
GLYNN
GODFREY
GODFRY
GOEL
GOMER
GONZALES
GONZALEZ
GONZO
GOPINATH
GORAN
GORDEN
GORDIE
GORDON
GORDY
GORTON
GOSHOVEN
GOTLIEB
GOTTFRIDH
GOTTFRIED
GOTTHILF
GOVAD
GOVINDAN
GOWON
GOYO
GRADY
GRAEME
GRAHAM
GRAHAME
GRANTLAND
GRANTLEY
GRANVILLE
GRATIEN
GREG
GREGG
GREGOR
GREGORY
GRENVILLE
GRIFF
GRIFFITH
GRIGORI
GRIMES
GROSVENOR
GROVER
GRUFFUDD
GRUFFYDD
GRZEGORZ
GUALTERIO
GUAYO
GUGIELMO
GUGLIELMO
GUIDO
GUILLAUME
GUILLERMO
GUILLO
GUIMING
GUITTIERE
GULIANNO
GULLERMO
GUNDERSON
GUNN
GUNNAR
GUNNERSON
GUNNY
GUNTER
GUNTHER
GUS
GUSTACIO
GUSTAF
GUSTAV
GUSTAVE
GUSTAVO
GUSTIN
GUSTOVO
GUTO
GYORGY
HABAIER
HABIB
HADAR
HADDEN
HADRIAN
HADRY
HAIDER
HAIME
HAJ
HAKAN
HAKEEM
HAKEM
HAKON
HAL
HALE
HALIL
HALIM
HAMAL
HAMDEL
HAMID
HAMIL
HAMILL
HAMILTON
HAMISH
HAMLIN
HAMMOND
HAMON
HAMP
HAMPTON
HANDY
HANIBAL
HANIF
HANK
HANNES
HANNIBAL
HANRAOI
HANS
HANSEL
HANUMAN
HAO
HARALAMBIE
HARALD
HARALDO
HARB
HARBERT
HARDIMAN
HARDING
HARI
HARLAN
HARLEY
HARLOWE
HARMAN
HARMON
HAROLD
HAROUN
HARRISON
HARRY
HARTMUT
HARVEY
HARVIE
HASAD
HASAN
HASHIM
HASHIR
HASIN
HASKEL
HASKELL
HASSEL
HASTIN
HAVELOCK
HAYDEN
HAYDYN
HAYWOOD
HEBER
HEBERT
HECTOR
HEDEON
HEDLEY
HEIKO
HEINRICH
HEINTZ
HEKTOR
HELAKU
HELGE
HELKI
HELMUT
HEMANT
HENDERSON
HENDRIK
HENGKY
HENK
HENNING
HENREY
HENRI
HENRICO
HENRIK
HENRY
HERBERT
HERBERTO
HERBIE
HEREMIAS
HERI
HERIBERTO
HERM
HERMAN
HERMANN
HERMON
HERNANDO
HERONIM
HERRIBERTO
HERSCH
HERSCHEL
HERSH
HERVE
HERVEY
HESUS
HEW
HEWART
HEWES
HEWETT
HEWIE
HEYWOOD
HICKS
HIDEMICHI
HIERMO
HIERONYM
HIERONYMOS
HILFREDO
HILLEL
HILMAR
HIMANSHU
HINKO
HINRICH
HINUN
HIRAM
HIROMI
HIROSHI
HIRSCH
HIRSH
HIRUS
HISOKA
HJALMAR
HNATOCHKO
HOB
HOBARD
HOBBES
HODGE
HODGES
HODGKINS
HOHAN
HOIBEARD
HOIREABARD
HOLDEN
HOLGER
HOLIC
HOLLEB
HOLLES
HOLLINGS
HOLLINS
HOLT
HOMER
HOOPER
HORACE
HORACIO
HORATIO
HORENTIO
HORIS
HORMAZD
HORMAZED
HORST
HOSEA
HOTAKA
HOUMAN
HOWARD
HOWEL
HOWELL
HOWI
HOWIE
HOYLE
HOYT
HSIEH
HUBBARD
HUBERT
HUBERTO
HUEY
HUGH
HUGHES
HUGHIE
HUGIBERT
HUGO
HULIN
HUMBERT
HUMBERTO
HUMFREY
HUMPHREY
HURLEY
HUSAIN
HUTCHINSON
HUTE
HUU
HUW
HUZAIFA
HYMAN
HYWEL
IAGO
IAIN
IAN
IANNIS
IBRAHIM
ICO
IFOR
IGANTOV
IGASHO
IGGY
IGNAC
IGNATIUS
IGNAZIO
IGOR
IKE
ILAN
ILDEFONSO
ILIIA
ILYA
IMAMU
IMMANUEL
IMMAUEL
INDERPREET
INERMO
INGEMAR
INGHAM
INGMAR
INGOLF
INIGO
INIKO
INNOKENTI
INRIQUES
INTEUS
INZAMAMUL
IOAKIM
IOAN
IOANNES
IOEL
IOSEPH
IRV
IRVIN
IRVING
IRWAN
IRWIN
IRWYN
ISAAC
ISAAK
ISAC
ISACC
ISADOR
ISAIA
ISAIAH
ISHMAEL
ISIDORE
ISTU
ITZHAK
IVAN
IVANOVITCH
IVAR
IVES
IVO
IVON
IVOR
IWAN
IZAAK
IZRAELIUS
IZRAIL
IZSU
IZUMI
IZZIE
IZZY
JAAFAR
JAAN
JABA
JABEZ
JABRIL
JACIAN
JACINTO
JACK
JACKSON
JACKY
JACOB
JACQUE
JACQUES
JAFAR
JAFET
JAGGER
JAGO
JAHI
JAIRY
JAKE
JAKOB
JAL
JAMAL
JAMES
JAMESON
JAMEY
JAMIE
JAMIL
JAMISON
JANEK
JAN-HARM
JANICK
JANINE
JANOS
JANSEN
JAPHETH
JARED
JAREK
JARETT
JARI
JAROGNIEW
JAROMIR
JARON
JAROSLAV
JAROSLAW
JARRED
JAS
JASCHA
JASON
JASPER
JAVAS
JAVIER
JAVIN
JAVIS
JAY
JAYANT
JAYANTHA
JAYE
JEAN-PAUL
JEB
JED
JEDIDIAH
JEDREK
JEDRZEJ
JEEVES
JEFF
JEFFEREY
JEFFERS
JEFFERSON
JEFFREY
JEFFRY
JEHAN
JELLOW
JENS
JEOFFROI
JEPHTHAH
JEPTHA
JER
JERED
JEREME
JEREMIAH
JEREMY
JERM
JEROME
JERONIMO
JERRIE
JERROD
JERROME
JERRY
JERVIS
JERZY
JESITO
JESPER
JESS
JESSE
JESU
JETHRO
JIAN
JIAN-JIN
JIBBEN
JIE
JIHO
JIM
JIMI
JIMMIE
JIMMY
JIRO
JIVIN
JOAB
JOACHIM
JOANNES
JOAO
JOAQUIM
JOAQUIN
JOBE
JOE
JOEL
JOEY
JOHAN
JOHANAN
JOHANN
JOHANNES
JOHN
JOHNIE
JOHNNIE
JOHNNY
JOHNS
JOHNSON
JOLON
JON
JONA
JONAH
JONAM
JONAS
JONATHAN
JONATHON
JONES
JONSON
JOQUIN
JORAN
JORDI
JORDYN
JORG
JORGE
JORGY
JORI
JORJI
JOSE
JOSEPH
JOSH
JOSHUA
JOSIA
JOSIAH
JOTHAM
JOUNI
JOURDAN
JOV
JUAN
JUBAL
JUDAH
JUDAS
JUDD
JULES
JULIAN
JULIO
JULIUS
JULLE
JUMAH
JUNO
JURATE
JURGEN
JURI
JUSTIN
JUSTINIAN
JUSTINO
JUSTIVO
JUSTO
KABIL
KADAR
KADIN
KADIR
KAENAN
KAIN
KAINE
KAITLYN
KALB
KALEB
KALIQ
KALKIN
KALMAN
KALOOSH
KALUS
KALVIN
KAMAL
KAMEL
KAMIL
KANE
KANTU
KARCH
KAREEM
KARIF
KARIM
KARIME
KARL
KARLHEINZ
KARLIK
KARMEL
KAROL
KAROLEK
KAROLIS
KASEKO
KASHIF
KASIB
KASIM
KASIMIR
KASPAR
KASPER
KATRICK
KATSUJI
KAU
KAYIN
KAYNE
KAZIMIERZ
KAZUTAKA
KEAHI
KEANU
KEB
KEDAR
KEDDY
KEDEM
KEEFE
KEEGAN
KEENAN
KEIGHRY
KEIR
KEITH
KEIZO
KELASH
KELBY
KELCEY
KELE
KELEMEN
KELSAY
KELSEY
KELSIE
KEN
KENAN
KENDRIC
KENDRICK
KENICHI
KENN
KENNETH
KENNEY
KENNIE
KENNY
KENRICK
KENYON
KERMIT
KERN
KERRY
KERS
KERSEN
KERWIN
KESAR
KESIN
KESSE
KESTER
KEVEN
KEVIN
KHALLIL
KHAMTAI
KHARALAMBOS
KHARALD
KHORDAD
KHRISTIAN
KHRISTOFOROS
KHRYSTIYIYAN
KHRYSTOFOR
KHURSHID
KHVYADOS
KIBBE
KIEL
KIERAN
KIJIKA
KIKO
KIL
KILIAN
KILLIAN
KIMO
KINGSLEY
KIP
KIPLING
KIRAL
KIRBY
KIRIL
KIRILL
KIRK
KISTNA
KISTUR
KITO
KIVI
KIYOSHI
KIZZA
KLAAS
KLAMENCAS
KLAUDIUSZ
KLAUS
KLAVDU
KLEMEN
KLEMENIS
KLEMENS
KLEMENT
KLEMO
KLIMEK
KLIMENT
KNOTON
KNUD
KNUT
KOBE
KOFI
KOKI
KOKUDZA
KOLYA
KONANE
KONDRAD
KONRAD
KONTAR
KORB
KOREY
KORUDON
KOSEI
KOSTAS
KOSTI
KOVAR
KREG
KRIKOR
KRISPIN
KRISS
KRISTER
KRISTIAN
KRISTO
KRISTOF
KRISTOFER
KRISTOFFER
KRISTOPHER
KRITOS
KRUIN
KRYS
KRZYS
KRZYSZTOF
KULEN
KUMAR
KUMARAVEL
KUPER
KURT
KURTIS
KUZIH
KWAKU
KWAM
KWAME
KWAN
KWASI
KWAZI
KWESI
KYLER
KYRIAKOS
KYRIL
KYRILLOS
KYROS
KYRYLO
LABAN
LABID
LACHLAN
LADD
LADO
LAFAYETTE
LAFREDO
LAINE
LAIRD
LAL
LALO
LAMAR
LAMARR
LAMBERT
LAMEL
LAMMOND
LAMOND
LAMONT
LANDON
LANGDON
LANGSTON
LANGUNDO
LANI
LANU
LARKIN
LARRANCE
LARRIE
LARRY
LARS
LARSON
LAUENTO
LAUNCE
LAUNCELOT
LAURAN
LAURENCE
LAURENS
LAURENT
LAURENTIUS
LAURENZ
LAVELLE
LAVI
LAWREN
LAWRENCE
LAWRY
LAWS
LAWSON
LEALAND
LEANARDO
LEANDER
LEBEN
LECH
LECHITO
LEEGRANT
LEELAND
LEIF
LEIT
LELAND
LEM
LEMOINE
LEMUEL
LEN
LENCI
LENHART
LENN
LENNARD
LENNIE
LENNO
LENNOR
LENNOX
LENNY
LENOX
LENSAR
LENZ
LEON
LEONARD
LEONARDO
LEONARDUS
LEONCIO
LEONE
LEONHARD
LEONID
LEOPOLD
LERON
LEROY
LESTER
LESZEK
LEVI
LEW
LEWIE
LEWIS
LEX
LIAM
LIANG
LIKO
LINDEN
LINDON
LINFRED
LINN
LINUS
LINWOOD
LIO
LIONARDO
LIONEL
LIONELLO
LITO
LIU
LIWANU
LLEWELLYN
LLEWELYN
LLOYD
LLYWELYN
LODEWICK
LODEWIJK
LODOVICO
LOE
LOEW
LOMAN
LONATO
LONNY
LORAN
LORANT
LORANZIO
LOREN
LORENS
LORENZO
LORNE
LOTHAR
LOU
LOUDON
LOUIE
LOUIS
LOVELL
LOVRE
LOWE
LOWELL
LOWENHARD
LOWTHER
LOYD
LUBOMIR
LUCAS
LUCIAN
LUCIANO
LUCIUS
LUCJAN
LUDOVIC
LUDVIG
LUDWIG
LUDWIK
LUIGI
LUIS
LUISTER
LUIZ
LUKAS
LUKE
LUKYAN
LUNT
LUTERIS
LUTHER
LUTHERIO
LUTZ
LYEL
LYELL
LYLE
LYNDON
LYNWOOD
LYRON
MAC
MACALIANO
MACE
MACIEJ
MACISIMI
MACK
MACKEEFRY
MACKEIGHRY
MADHUJIT
MADOC
MADOG
MADS
MAELMORE
MAGGIO
MAGNUS
MAHIR
MAHLOM
MAIK
MAIMUN
MAIRAV
MAITLAND
MAKAN
MAKIS
MAKSIM
MAL
MALACHI
MALACHY
MALCOLM
MALIK
MALON
MAMO
MANCHO
MANCHU
MANCO
MANDEK
MANDER
MANDO
MANDRILL
MANFRED
MANIPI
MANLIO
MANNY
MANSA
MANSAH
MANSOOR
MANSUR
MANU
MANUEL
MANUS
MAOLMUIRE
MAQSOOD
MARAR
MARC
MARCEL
MARCELINO
MARCELLUS
MARCIAL
MARCIUS
MARCO
MARCOS
MARCUS
MAREK
MARIANO
MARID
MARIN
MARIO
MARIUS
MARKELL
MARKOS
MARKUS
MARLIN
MARLON
MARLY
MARMADUKE
MARNIN
MARON
MARQUITOS
MARR
MARRIM
MARSILIO
MART
MARTAINN
MARTEL
MARTEN
MARTIE
MARTIJN
MARTIN
MARTINICINO
MARTON
MARTY
MARUT
MARV
MARVE
MARVEN
MARVIN
MASAHIRO
MASAMITSU
MASAMO
MASASHI
MASCIMO
MASHRUK
MASIAL
MASLIN
MASOU
MASSEY
MASSIMILIANO
MASUD
MATA
MATEJ
MATEJO
MATEO
MATEUSZ
MATHEO
MATHEW
MATHIAS
MATHIEU
MATO
MATOPE
MATS
MATTEO
MATTHAEUS
MATTHAUS
MATTHEO
MATTHES
MATTHEUS
MATTHEW
MATTHIA
MATTHIAS
MATTIE
MATTIEU
MATTY
MATYAS
MAUR
MAUREO
MAURICE
MAURICIO
MAURIE
MAURITS
MAURIZIO
MAURO
MAUROSIO
MAURSIO
MAURY
MAXIME
MAXIMILIAN
MAXIMILIANO
MAXIMILIANUS
MAXIMILIEN
MAXIMILLIAN
MAXIMINO
MAXIMUS
MAXINO
MAXIO
MAXWELL
MAYER
MAYON
MCCULLAGH
MCCULLOCK
MCCULLOUCH
MCCULLOUGH
MECHTILDE
MEHDI
MEHMET
MEHTAR
MEIR
MELOR
MELVERN
MELVILLE
MELVIN
MELVYN
MENDELEY
MENKER
MENNO
MENSAH
MENZ
MERED
MERLIN
MERRICK
MERRIPEN
MERRITT
MERTIN
MERVIN
MERVYN
MERWYN
MESSIMO
MESTIPEN
MEURIG
MEURIZ
MEW
MEYER
MICAJAH
MICALAO
MICHAEL
MICHAIL
MICHEIL
MICHEL
MICHELE
MICHIEL
MICK
MICKEL
MICKEY
MICKY
MIECZYSLAW
MIGAEL
MIGUEL
MIGUELITO
MIKAEL
MIKE
MIKEL
MIKHAEL
MIKHAIL
MIKKEL
MIL
MILAP
MILES
MILKO
MILLS
MILO
MILOGOST
MILOS
MILT
MILTON
MIMIS
MINGAN
MINGDONG
MING-FANG
MINGO
MIRIT
MIRKO
MIROSLAV
MIROSLAW
MISU
MITCH
MITCHEL
MITCHELL
MOAB
MOE
MOHAMMAD
MOHAMMED
MOHAN
MOJAG
MOLIMO
MONET
MONRO
MONROE
MONTAGU
MONTAGUE
MONTE
MONTGOMERY
MONTY
MOON-SUK
MOORE
MORDECAI
MORDIKAI
MOREL
MOREY
MORICZ
MORITZ
MORLEY
MORREL
MORRELL
MORRICE
MORRISON
MORRISS
MORTEN
MORTIE
MORTIMER
MORTON
MORVEN
MOSE
MOSES
MOSHE
MOSHEH
MOSIE
MOSS
MOSSIMO
MOSTYN
MOSWEN
MOTEGA
MOY
MOYES
MOZE
MOZES
MUHAMMAD
MULL
MUNDA
MUNDEK
MUNDY
MUNRO
MUNROE
MUNROW
MURDO
MURDOCH
MURRAY
MURRY
MURTAGH
MURTHY
MURUGANANDAN
MUSHTAQ
MYLES
MYRON
NAB
NABIL
NADER
NADO
NAGID
NAHELE
NAHMA
NAHUM
NALDO
NALREN
NAMID
NAMIR
NANDA
NANDIN
NANDO
NANDOR
NANO
NAOMICHI
NARAIN
NARD
NASSER
NAT
NATAL
NATALE
NATAN
NATANEAL
NATANIEL
NATE
NATHAN
NATHANEAL
NATHANIEL
NATILIO
NAV
NAVEED
NAWAT
NAYATI
NEACAIL
NEAL
NEALE
NEALEY
NEALL
NEALSON
NECHO
NECOLAS
NEDDIE
NEDDY
NEEL
NEELAM
NEERAJ
NEHRU
NEIL
NEILL
NEIRIN
NELEK
NELO
NELS
NELSON
NEN
NEPER
NEPTER
NERMIN
NERON
NESTOR
NETO
NEVIL
NEVILE
NEVILLE
NEVIN
NEWLIN
NEWTON
NIAL
NIALL
NIBAW
NIBRAS
NICABAR
NICANOR
NICCOLINI
NICCOLO
NICHOL
NICHOLAS
NICK
NICKLAS
NICKOLAUS
NICO
NICODEMUS
NICOLAAS
NICOLAI
NICOLAO
NICOLAS
NICOLAUS
NICOLUM
NIEL
NIELS
NIELSON
NIGAN
NIGEL
NIK
NIKHIL
NIKITA
NIKKY
NIKLAS
NIKO
NIKOLAAS
NIKOLAI
NIKOLAOS
NIKOLAUS
NIKOLOS
NILES
NILO
NILS
NILSON
NIMBUS
NINO
NIONIOS
NISHU
NISSIM
NITIN
NITIS
NIVEN
NIX
NNAMDI
NOAH
NOAM
NOBBY
NOBLE
NOBUMITSU
NOBUTAKA
NODIN
NOE
NOLAN
NOLAND
NOLDY
NOLL
NORBERT
NORMAND
NORMIE
NORMY
NORRIS
NORT
NOWEL
NOWELL
NOWLES
NOY
NUMAIR
NUMPS
NUR ADIBA
NURI
NUSAIR
OAKLEY
OBA
OBADIAH
OBERON
OBRAM
OCTAVIAN
OCTAVIUS
ODAY
ODELL
ODIN
ODINAN
ODINUM
ODION
ODISSAN
ODO
ODOARDO
ODOM
ODON
ODYSSEUS
OFER
OFFIN
OGüN
OGÃ¼N
OGDEN
OGDON
OGDUN
OG??N
OG?N
OGUN
OHANKO
OHANNES
OHIN
OIGHRIG
OKO
OKON
OLAF
OLAV
OLEG
OLERY
OLES
OLIN
OLIVA
OLIVER
OLIVERIO
OLIVIER
OLIVO
OLLEY
OLLIE
OLLY
OLORUN
OLWEN
OMAR
OMER
OMERO
ONAN
ONANI
ONDREJ
ONDRO
O'NEIL
ONFREDO
ONFROI
ONOFRE
ONOFREDO
OON-GIL
OPIE
ORACIO
ORASIO
ORAZIO
ORBAN
ORDANDO
OREL
OREN
ORIEN
ORIN
ORIOLE
ORIS
ORITO
ORJI
ORLAND
ORLONDO
ORMOND
ORRIN
ORSINO
ORSON
ORUNJAN
ORV
ORVIE
ORVILLE
OSAMU
OSBERT
OSBORN
OSBORNE
OSEEP
OSKAR
OSMAN
OSMANS
OSMIN
OSMOND
OSRIC
OSSIAN
OSSIE
OSSY
OSWALD
OSWELL
OSWIN
OTADAN
OTELLO
OTHELLO
OTHO
OTHOM
OTHONEIL
OTIS
OTMAN
OTO
OTONE
OTONIEL
OTTAH
OTTMAR
OTTO
OTTON
OTTORINO
OURAY
OVE
OVID
OWAIN
OWAYNE
OWEN
OWUDUNNI
OZ
OZZIE
PAAVO
PABIS
PABLINO
PABLO
PABOLO
PACKY
PACO
PADDY
PADEN
PADRAIC
PADRAIG
PADRIG
PADRUIG
PAKI
PAL
PALACIDO
PALADIN
PALLATON
PANCHITO
PANCHO
PANCHOLO
PANDELO
PANFILO
PANKAJ
PANZO
PAOLI
PAOLINO
PAOLO
PAPILLONG
PAPLO
PAPPLO
PAPPLONE
PAQUIN
PARKER
PARLAN
PARNEL
PARNELL
PARRIS
PARRISH
PARSEFAL
PARSIFAL
PARTHALON
PARTHOLON
PARZIVAL
PASCAL
PASCHALL
PASCHELL
PASCOE
PASQUAL
PASSIFULL
PATAMON
PATRICIANO
PATRICIO
PATRICK
PATRIN
PATRITIO
PATRIZIUS
PATTIN
PATTISON
PATTON
PATWIN
PAUL
PAULICO
PAULIE
PAULINO
PAULIUS
PAULLIN
PAULO
PAULOS
PAULOT
PAULTJE
PAULUM
PAULUS
PAVA
PAVEK
PAVEL
PAVLIN
PAVLO
PAWEL
PAWLEY
PAXTON
PAYAT
PAYNE
PAYTON
PEADAIR
PEARCE
PEARSON
PEDDY
PEDER
PEDR
PEDRAN
PEDRO
PEERS
PELO
PELOTA
PENJANI
PENTTI
PEPPO
PER
PERCE
PERCEVAL
PERCIFULL
PERCIVAL
PERCY
PERICO
PERIQUIN
PERKIN
PERNEL
PERNELL
PERO
PERRIN
PERRY
PERSEUS
PERSHING
PESACH
PETE
PETER
PETERS
PETEY
PETIE
PETR
PETRICK
PETRIE
PETRONIO
PETRONIUS
PETROS
PETRUCCIO
PETRUS
PETRUSCHA
PEYO
PEYTON
PHELIS
PHIL
PHILIP
PHILIPPE
PHILIPPOS
PHILLIP
PHINEAS
PHOTIOS
PHUONG
PIAS
PICO
PIEDRO
PIERIN
PIERO
PIERRE
PIERROT
PIERS
PIET
PIETER
PIETRO
PILAN
PILAR
PILIB
PILLAN
PINO
PINOCCHIO
PINON
PIOTR
PIPITO
PIPPO
PIQUIN
PIRRO
PITER
PITO
PITRICIO
PIUS
PJOTR
PLACEDO
PLACI
PLACIDO
PLASIO
PLATO
PLATON
PLESIDO
POL
POLIN
PONCHO
PONSO
PORFIRIO
POV
POWA
PRABHAKAR
PRAKASH
PRANAS
PRASHANT
PREM
PRESTON
PRISCILLO
PRZEMEK
PUAY
PUCK
PUDGE
PURDY
PURSEY
PURVIS
PYOTR
QASIM
QIANG
QUAASHIE
QUAN
QUENTIN
QUICO
QUILL
QUILLAN
QUILLERMO
QUINA
QUINCY
QUINITUS
QUINLAN
QUINT
QUINTIN
QUINTON
QUIQUE
QUIQUI
QUIRIN
QUITO
QUOC-AN
RAB
RABAN
RABBIE
RABI
RABIN
RACHO
RADEK
RADMAN
RADOMIL
RADOSLAV
RADOSLAW
RADZIMIERZ
RAEBURN
RAFAEL
RAFAL
RAFALEK
RAFAYIL
RAFE
RAFF
RAFFAEL
RAFFAELLO
RAFI
RAFIUDDIN
RAGHNALL
RAGNAR
RAHEEM
RAHMAN
RAHMET
RAHUL
RAIDEN
RAIMONDO
RAIMONT
RAIMUND
RAIMUNDO
RAINI
RAJAN
RAJIB
RAJIV
RALDAN
RALF
RALPH
RALPHIE
RAMEO
RAMESH
RAMMAN
RAMON
RAMSAY
RAMSDEN
RAMSEY
RAND
RANDALL
RANDELL
RANDEY
RANDIE
RANDLE
RANDOLF
RANDOLPH
RANDY
RANON
RANULF
RAOUL
RAPHAEL
RAPIER
RASHAD
RASHADI
RASHID
RASHMI
RASHNE
RASMUS
RASTISLAV
RASTUS
RAUL
RAULIO
RAULO
RAVI
RAVID
RAVIV
RAY
RAYKE
RAYMOND
RAYNER
RAYNOLD
RAZI
READE
REAMONN
REDBERT
REDD
REDDY
REDE
REDMOND
REDMUND
REDOLFO
REDVERS
REECE
REES
REESE
REG
REGES
REGGIE
REGGY
REGINALD
REGINMUNT
REGIS
REGNAULD
REGNAULT
REGULO
REICO
REID
REIMUND
REIN
REINALD
REINALDO
REINALDOS
REINER
REINHARD
REINHOLD
REINOLD
REINWALD
REISS
REMINGTON
RENALDO
RENARD
RENATO
RENAUD
RENAUT
RENDOR
RENE
RENENET
RENOUF
RENZO
RESHAM
REUBEN
REUBIN
REUEL
REUVEN
REX
REXFORD
REY
REYES
REYHAN
REYMOND
REYMUNDO
REYNALDO
REYNALDOS
REYNOLD
REZSO
RHETT
RHODRI
RHYDDERCH
RHYS
RIC
RICARDO
RICCARDO
RICCIARDO
RICHARD
RICHARDSON
RICHART
RICHERD
RICHI
RICHIE
RICK
RICKERT
RICKY
RICO
RICORDIO
RIDLEY
RIIK
RIKARD
RIKS
RILEY
RIMINGTON
RIMON
RIMRIL
RINALDO
RINGAN
RINGO
RIO
RIOBARD
RION
RIQUERTO
RIQUI
RISTO
RITCHIE
RIYADH
RIZWAN
RIZZO
ROALD
ROAN
ROBAR
ROBB
ROBBIE
ROBBY
ROBERT
ROBERTO
ROBERTSON
ROBI
ROBIN
ROBINSON
ROBSON
ROCCO
RODALFO
RODAS
RODDIE
RODDY
RODERIC
RODERICH
RODERICK
RODGE
RODGER
RODGERS
RODHLANN
RODIN
RODMAN
RODNEY
RODOLFO
RODOLPH
RODREGO
RODRICK
RODRIGO
ROELAND
ROG
ROGELIO
ROGER
ROGERIO
ROGERO
ROGERS
ROGUERIO
ROHELIO
ROHIN
ROHIT
ROI
ROJELIO
ROLAND
ROLANDO
ROLDAN
ROLF
ROLFE
ROLLAN
ROLLAND
ROLLIE
ROLLIN
ROLLINS
ROLLO
ROLLON
ROLLY
ROLO
ROLON
ROLPH
ROMAIN
ROMANO
ROMARICO
ROMEO
ROMINO
RON
RONALD
RONALDO
RONAN
RONNIE
RONNY
ROOSEVELT
ROPPON
RORIE
RORY
ROSMER
ROSS
ROTH
ROUVIN
ROVERTO
ROWE
ROWLAND
ROY
ROYCE
ROYD
ROYDON
RUAIRDHRI
RUAIRI
RUBBEN
RUBEN
RUBERTO
RUDD
RUDDY
RUDGERD
RUDIGER
RUDO
RUDOLF
RUDOLPH
RUDOLPHO
RUDOLPHUS
RUDRO
RUDY
RUDYARD
RUFE
RUFEO
RUFERTO
RUFFO
RUFINO
RUFINUS
RUFIO
RUFO
RUFUS
RUGGERO
RUGGIERO
RUGINO
RUJELIO
RULF
RUNAKO
RUPERT
RUPERTO
RUPO
RUPRECHT
RURICH
RURIK
RUSHI
RUSS
RUSSEL
RUTGER
RUTHERFORD
RUTTY
RUY
RUYEN
RYAN
RYDELL
RYLAND
RYSZARD
SABRIAM
SABURO
SACARIAS
SACCO
SACHAR
SADANAND
SADDAM
SAHALE
SAHEN
SAIDUR
SAIFUL
SAILBHEASTAR
SAKIMA
SAL
SALEEM
SALIH
SALIM
SALMALIN
SALMAN
SALMON
SALOMON
SALOS
SALUD
SALUSTIANO
SALVADOR
SALVADORE
SALVALUS
SALVATORE
SAM
SAMARESH
SAMEER
SAMEIN
SAMI
SAMIR
SAMMON
SAMMY
SAMOUEL
SAMUEL
SAMUELE
SAMUELO
SAMURU
SANAT
SANDEEP
SANDER
SANDERS
SANDIP
SANDON
SANDOR
SANDY
SANGDRAX
SANI
SANJAY
SANJEEV
SANSON
SARAD
SARGE
SARGENT
SARNGIN
SAROJIN
SAROSH
SARTAN
SATISH
SAUL
SAURABH
SAURAV
SAUVEUR
SAVALUS
SAVAS
SAVVAS
SAYAKA
SCHINDLER
SCHROEDER
SCHUYLER
SCOTIE
SCOTT
SCOTTI
SCOTTIE
SCOTTY
SCUIT
SEAIAN
SEAMUS
SEAN
SEANN
SEBASTIAN
SEBASTIANO
SEBASTIANOS
SEBASTIEN
SEBASTIENE
SEETHARAM
SEF
SEFANO
SEGEL
SEGRERICO
SEIF
SEKER
SELBASTIANO
SELBY
SELIM
SELMAR
SELVESTRE
SEM
SENON
SENTHILKUMAR
SENWE
SEOSAIDH
SEPP
SEPPEL
SEPTIMUS
SERGE
SERGEI
SERGIO
SERMET
SESILIUM
SESSYLT
SETH
SEUMAS
SEUMUS
SEVASTIAN
SEVILEN
SEXTUS
SEYMORE
SEYMOUR
SHABBEEDUR
SHAD
SHAFAYET
SHAH
SHAHAK
SHAHRIYAR
SHALOM
SHAMEEL
SHAMIR
SHAMUS
SHANDAR
SHANE
SHANKAR
SHANON
SHAQUILLE
SHARIF
SHAUL
SHAUN
SHAW
SHAWN
SHAY
SHEARD
SHEEHAN
SHEHREVAR
SHELDON
SHELOMOH
SHELTON
SHEM
SHEMUEL
SHEN
SHENGDAR
SHERATAN
SHERBORN
SHERIDAN
SHERM
SHERMAN
SHIH
SHIMON
SHIMSHON
SHING
SHINO
SHIRO
SHLOMO
SHOLOM
SHOLTO
SHRIHAS
SHU-HUNG
SHUL
SHYENTI
SICILIO
SID
SIDATH
SIDDHARTH
SIDONIUS
SIEGFRIED
SIEGHARD
SIEGLINDE
SIEGMUND
SIG
SIGAMOND
SIGFRID
SIGISMOND
SIGISMUND
SIGISMUNDO
SIGISMUNDUS
SIGMOND
SIGMUND
SIGURD
SILAS
SILVAIN
SILVANO
SILVANUS
SILVERIO
SILVESTER
SILVESTRE
SILVESTRO
SILVIO
SIMAO
SIMEN
SIMEON
SIMON
SIMPKINS
SIMPSON
SINCLAIR
SINGH
SIOBHAN
SIOMONN
SIPATU
SIRILIO
SIROL
SIVA
SIVAN
SKYLAR
SLANE
SLAVIK
SLAWOMIR
SLEVIN
SLY
SOBIESLAW
SOCRATES
SOFIAN
SOFRONIO
SOHIL
SOL
SOLAMAN
SOLAMH
SOLLIE
SOLLY
SOLOMON
SOLON
SOMHAIRLE
SONGAN
SONNY
SOPHRONIO
SOSIMO
SPED
SPENCE
SPENSER
SPIRIDION
SPOFFORD
SPOFFORTH
SRDAN
SRDJAN
SREKO
SRINIVAS
SRULKA
STAN
STANCIO
STANE
STANISLAUS
STANISLAV
STANISLAW
STANLEE
STANLEIGH
STANLEY
STANLY
STARLING
STARR
STEAPHAN
STEFAN
STEFANO
STEFFEN
STEPHAN
STEPHANO
STEPHANOS
STEPHANUS
STEPHEN
STEPKA
STERLING
STEUART
STEVE
STEVEN
STEVIN
STEW
STEWART
STIGGUR
STIOBHAN
STIRLING
STOFFEL
STORI
STROM
STU
STUART
STYG
SUBHANI
SUBIR
SUDHIR
SUDI
SUMAN
SURAJ
SURESH
SUTI
SVEN
SWORN
SY
SYD
SYED
SYLBESTRIO
SYLVESDRE
SYLVESTER
SYRIL
SZCZEPAN
SZCZESNY
SZYMON
TAAVETTI
TABIB
TABO
TABOR
TADEO
TADEUSZ
TADHG
TADI
TADZI
TAGHI
TAHIR
TAISON
TAIT
TAJ
TAKASHI
TAKAYUKI
TAKESHI
TAKIS
TAKUJI
TALES
TALIESIN
TALLI
TALMAN
TAMAN
TAMAR
TAMID
TANDY
TANEK
TANER
TANNER
TANO
TARAS
TAREK
TARINTINO
TARIQ
TARN
TARO
TARQUIN
TARRIN
TARRUS
TATSU
TATSUYA
TATTON
TAUNO
TAURIN
TAVIS
TAVITO
TAVO
TAWNO
TAYIB
TAYOR
TAZARI
TEARACH
TEARLACH
TECUMSEH
TED
TEDI
TEEMOFE
TELEK
TELEM
TEM
TEMAN
TEMANI
TEMOTIO
TENTE
TEODERO
TEODOCIO
TEODORO
TEOFILO
TERANCE
TERCERO
TERENCE
TERENCIANO
TERENCIO
TERENTILO
TERERSO
TERES
TERO
TERRANCE
TERREL
TERRELL
TERRENCE
TERRILL
TERRIS
TERRY
TERTULIAN
TERUMI
TETRIS
TEUVO
TEV
TEVA
TEWDWER
TEWDWR
THAD
THADDAUS
THADDEO
THADDEUS
THADDY
THADY
THAINE
THANH
THANIT
THANOS
THAYNE
THEADOR
THEIRRY
THELONIUS
THEMATHEO
THEMIS
THEO
THEOBALD
THEODERIC
THEODOR
THEODORE
THEODORIC
THEODOROS
THEODORUS
THEOPHILUS
THERON
THIAGO
THIERRY
THOM
THOMA
THOMAS
THOMESITO
THOMPSON
THOR
THORBURN
THOROLD
THORSTEN
TIBS
TICHO
TIDZIO
TIELMAN
TIENNOT
TIEODORO
TIGER
TIJEN
TILDEN
TILO
TIM
TIMATEO
TIMEEN
TIMETO
TIMEUS
TIMIN
TIMIRO
TIMITEO
TIMMIE
TIMMY
TIMO
TIMOFEI
TIMON
TIMOTEO
TIMOTEUS
TIMOTHEE
TIMOTHEOS
TIMOTHEUS
TIMOTHY
TIMOTY
TIMUR
TINO
TIOMOID
TIONG
TITO
TITUS
TIVON
TOBAL
TOBALITO
TOBBAR
TOBIAS
TOBY
TOD
TODD
TODOR
TODORKO
TODORO
TOHON
TOKAHI
TOLA
TOLEK
TOLI
TOM
TOMA
TOMAN
TOMAS
TOMASENS
TOMASH
TOMASO
TOMAZ
TOMI
TOMITO
TOMLIN
TOMMIE
TOMMY
TOMOAKI
TOMOICHIRO
TOMOTAKA
TOMOYUKI
TONCHO
TONEK
TONG
TONICO
TONIO
TONY
TOPI
TOPWE
TORD
TORE
TORQUIL
TORRENCE
TORREY
TORSTEN
TOSHIO
TOTOYA
TOVANO
TOVI
TRANTER
TRAV
TREFOR
TREV
TREVOR
TREY
TRIMOTEO
TRISTAM
TRISTAN
TRISTEM
TRISTRAM
TRUXTON
TRYSTAN
TUAN
TUCK
TUCKER
TUDOR
TUDUR
TUDYR
TUKULI
TULLIO
TULLY
TUNG
TUNU
TUPI
TURI
TURLOGH
TURLOUGH
TUTA
TUTO
TY
TYBALT
TYEE
TYEHIMBA
TYLER
TYMON
TYROME
TYRONE
TYSON
TZU-CHIN
UALTAR
UBALDO
UBERTO
UDE
UDO
UGO
UGOLINO
UGON
UILLEAM
UILLIAM
UILLIOE
UINSIONN
ULAND
ULANDUS
ULF
ULICK
ULISES
ULMAR
ULRIC
ULRICH
ULTAN
ULYSSES
UMBERTO
UMESH
URBAINE
URBANO
URBANUS
URI
URIAH
URIEL
URIEN
URLANDO
URSO
URSON
URSUELO
URSUL
URVAN
USMAN
USSULO
UTHMAN
UTZ
UVAL
UWE
UZOMA
VACLAV
VADIM
VADIN
VAHE
VALDEMAR
VALEN
VALENTE
VALENTIJN
VALENTIN
VALENTINO
VALIN
VALMY
VANCE
VANKA
VANN
VANNI
VARDEN
VARECK
VARRICK
VARTAN
VARTOLOMEI
VARTOLOMEIU
VAS
VASCO
VASILIOS
VASILIS
VASILIY
VASIN
VASSILY
VASSILYIJ
VASSKA
VASYLTSO
VAUGHAN
VAUGHN
VAZUL
VEICENTE
VELDEN
VENCEL
VENEDICTOS
VENIAMIN
VENJAMIN
VENU
VENUDHAR
VENYA
VERED
VERGIL
VERN
VERNALDO
VERNALDOS
VERNAVELA
VERNE
VERNEY
VERNON
VIC
VICENCIO
VICENTE
VICENTIUS
VICENTY
VICENZ
VICENZO
VICHE
VICHO
VICK
VICO
VICTO
VICTOIR
VICTORIANAS
VICTORINO
VICTRO
VIDA
VIDAL
VIDRIK
VIET
VIFFORIANO
VIGGO
VIGNESH
VIHELM
VIJAY
VIKENTIJ
VILDOR
VILHELM
VILI
VILJO
VILMAR
VILTORIANO
VIN
VINAL
VINCE
VINCENT
VINCENTE
VINCZE
VINN
VINNIE
VINNY
VINOD
VIPIN
VIRGE
VIRGIL
VIRGILIO
VIRROR
VISENT
VISHAL
VISHNU
VITALIY
VITE
VITO
VITORIO
VITTORIO
VIZENTE
VLACH
VLADILEN
VLADIMIR
VLADIMIRO
VLADISLAV
VLADLEN
VLADO
VOLKER
VOLODYMYR
VON
VORAVIT
VOYTEK
VURAL
VYACHESLAV
WABAN
WACLAW
WADE
WAKIZA
WALACHE
WALD
WALDEN
WALDO
WALID
WALKER
WALLACE
WALLACHE
WALLIE
WALLIS
WALLY
WALSH
WALT
WALTER
WALTERS
WALTHER
WALTON
WAPI
WARD
WARDELL
WARDEN
WARDER
WARINER
WARNER
WARREN
WARRICK
WASI
WASIF
WAT
WATERIO
WATKIN
WATSON
WATTY
WAWRZYNIEC
WAYLEN
WAYLON
WAYNE
WEBB
WEBBE
WEBBER
WEBSTER
WELBY
WELCH
WEMILAT
WEMILO
WEN
WENCESLAS
WENDE
WENDELL
WENZEL
WERNER
WES
WESH
WESLEY
WESTLEIGH
WESTLEY
WESTON
WICENT
WICHADO
WIELAND
WIELISLAW
WIL
WILANU
WILBERT
WILBUR
WILDER
WILDON
WILEY
WILFRED
WILFRID
WILFRIED
WILHELM
WILKES
WILLARD
WILLEM
WILLET
WILLI
WILLIAM
WILLIAMSON
WILLIE
WILLIS
WILLY
WILMER
WILMOT
WILNY
WILSON
WILU
WIM
WIMUND
WINFIELD
WINFRIED
WINGI
WINN
WINSTON
WINTHROP
WINTON
WINWARD
WISLAW
WITOLD
WLADYSLAW
WLODEK
WLODZIMIERZ
WLODZISLAW
WOJCIECH
WOLFGANG
WOLFRAM
WONG
WOODIE
WOODROW
WOODY
WOUTER
WRIGHT
WULFRIC
WULITON
WULLIE
WUNAND
WUYI
WYATT
WYLIE
WYMOND
WYNONO
WYNTON
WYSTAN
XABIEL
XABIER
XAN
XAVER
XAVIER
XAYVION
XENO
XENOS
XEREX
XERXES
XEVER
XIAOBING
XIETIAN
XIMON
XU
XUN
YAAKOV
YAAR
YADID
YADIN
YAFEU
YAHOLO
YAHYA
YAKAR
YAKECEN
YAKEZ
YAKIM
YAKOV
YAMAL
YAMIN
YAMUT
YAN
YANAI
YANCY
YANG
YANN
YANNIC
YANNIS
YANOACH
YAO
YARB
YARDEN
YARED
YAREV
YARIN
YASAH
YASAHIRO
YASH
YASHASKAR
YASIN
YASIR
YASSEN
YASSER
YASUHARU
YASUHIRO
YASUO
YA'UB
YAYO
YAZID
YECHEZKEL
YEDIDIAH
YEHOCHANAN
YEHONATAN
YEHOSHA
YEHOSHUA
YEHOYAKIM
YEHUDAH
YEMON
YERED
YERGEI
YERIEL
YERIK
YESHAYAHU
YEVGENIY
YIRMEYAH
YIRMEYAHU
YISHA
YISHACHAR
YISHMAEL
YISRAEL
YITRO
YITZCHAK
YITZHAK
YMIR
YNYR
YOCHANAN
YOEL
YOGI
YOHANAN
YONAH
YONAS
YONATAN
YONI
YOOMTIS
YORATH
YORICK
YOSEF
YOSEPH
YOUKIOMA
YOYI
YOYO
YSAAC
YSAAX
YSAC
YSAYE
YSSACH
YUBO
YUCEL
YU-FAI
YUHSIN
YUKIO
YULIUS
YUNIS
YUNUS
YURE
YURI
YURIY
YURY
YUSEF
YUSHUA
YUSSUF
YUSUF
YUSUKE
YUTU
YUVAL
YUYO
YUYU
YVAINE
YVES
YVON
ZAC
ZACARIAS
ZACARIAZ
ZACARIO
ZACARIS
ZACCARIA
ZACCHAEUS
ZACH
ZACHAIOS
ZACHARIAH
ZACHARIAS
ZACHARIE
ZACHARJASZ
ZACHARY
ZACHERY
ZACK
ZACKRY
ZAED
ZAFAR
ZAHAIR
ZAHAVI
ZAHID
ZAHIR
ZAHUR
ZAID
ZAK
ZAKAI
ZAKARIAS
ZAKARIJ
ZAKARIYYA
ZAKI
ZAKUR
ZAMEER
ZAMIR
ZANDER
ZANE
ZAQUARIAS
ZAREB
ZAREK
ZAVAD
ZAVDIEL
ZAVIER
ZAVIOR
ZAYD
ZBIGNIEW
ZBYHNEV
ZDENEK
ZDESLAV
ZDZISLAW
ZEB
ZEBADIAH
ZEBEDEE
ZEBULON
ZEBULUN
ZECHARIAH
ZECHARYA
ZED
ZEDEKIAH
ZEEMAN
ZEHARIAH
ZEHEB
ZEINAB
ZEKE
ZEKI
ZELIMIR
ZEMARIAH
ZENO
ZENOBIOS
ZENON
ZENOS
ZENZEL
ZEPH
ZEPHANIAH
ZEPHYR
ZEPHYRUS
ZERACH
ZERACHIA
ZEREM
ZERIKA
ZETHUS
ZEUS
ZEV
ZEVACH
ZEVACHIAH
ZEVADIAH
ZEVID
ZEVULUN
ZHANMIAO
ZHIHUA
ZHIYU
ZHONG
ZHU
ZHUANG
ZIG
ZIGGY
ZIKOMO
ZIMON
ZIMRAN
ZIMRI
ZINAN
ZINOVA
ZINTE
ZIPKIYAH
ZITKADUTA
ZITOMIR
ZIV
ZIVAN
ZIVEN
ZIYA
ZIYAD
ZLATAN
ZLAVADOR
ZOLLIE
ZOLLY
ZOLTAN
ZOMEIR
ZORYA
ZOTOM
ZSIGMOND
ZUBERI
ZUBIN
ZUHAYR
ZWI
ZYGMUNT
ZYRILLUS
ZYRILLUS
JEAN-CLAUDE
ARISTIDES
JORDAN
ATTICUS
KOEN
HASSAN
ABU
HUSSEIN
INACIO
KHALID
BOBBY
NABEEL
BRADY
MASON
AIDEN
BENEDIKT
SPENCER
GRAYSON
DORION
NIC
BRYSON
KYLE
CODY
ISSAC
JORDY
VLAD
ZIQI
MACKENZIE
KRIS
JARRET
DOMINICK
JARET
JORICK
KAI
LOGAN
GONZALO
KHALED
CONSTAND
