# Supplementary material for: ScholarLens: extracting competences from research publications for the automatic generation of semantic user profiles
Source: PeerJ journal article supplement (doi:10.7717/peerj-cs.121), 2017-07-03
Supplement: Pipeline.zip [file Pipeline.zip › Pipeline/gate/plugins/ANNIE/resources/gazetteer/person_male_lower_ambig.lst]

abbot:kind=ambig
archer:kind=ambig
art:kind=ambig
ash:kind=ambig
austin:kind=ambig
bane:kind=ambig
baron:kind=ambig
basil:kind=ambig
beau:kind=ambig
bent:kind=ambig
bentley:kind=ambig
bing:kind=ambig
borg:kind=ambig
brand:kind=ambig
brent:kind=ambig
cam:kind=ambig
cesar:kind=ambig
chad:kind=ambig
chretien:kind=ambig
christian:kind=ambig
chuck:kind=ambig
clark:kind=ambig
clay:kind=ambig
clerk:kind=ambig
cliff:kind=ambig
clyde:kind=ambig
cosmo:kind=ambig
dale:kind=ambig
darling:kind=ambig
dean:kind=ambig
devon:kind=ambig
dew:kind=ambig
dick:kind=ambig
dodge:kind=ambig
don:kind=ambig
drake:kind=ambig
drew:kind=ambig
dud:kind=ambig
dude:kind=ambig
duff:kind=ambig
dug:kind=ambig
duke:kind=ambig
dunk:kind=ambig
earl:kind=ambig
egg:kind=ambig
faber:kind=ambig
fabian:kind=ambig
ferris:kind=ambig
fin:kind=ambig
fletcher:kind=ambig
forester:kind=ambig
fountain:kind=ambig
frank:kind=ambig
garnet:kind=ambig
gorgeous:kind=ambig
gram:kind=ambig
grant:kind=ambig
gray:kind=ambig
griffin:kind=ambig
grove:kind=ambig
gun:kind=ambig
gunner:kind=ambig
guy:kind=ambig
halley:kind=ambig
ham:kind=ambig
heath:kind=ambig
heinz:kind=ambig
herb:kind=ambig
hero:kind=ambig
heron:kind=ambig
hood:kind=ambig
hoop:kind=ambig
hudson:kind=ambig
hung:kind=ambig
hunter:kind=ambig
hutch:kind=ambig
irvine:kind=ambig
jarvis:kind=ambig
jock:kind=ambig
jordan:kind=ambig
kale:kind=ambig
kelvin:kind=ambig
kent:kind=ambig
lance:kind=ambig
leaf:kind=ambig
lee:kind=ambig
lefty:kind=ambig
leo:kind=ambig
levy:kind=ambig
lincoln:kind=ambig
mark:kind=ambig
marsh:kind=ambig
marshal:kind=ambig
mat:kind=ambig
matt:kind=ambig
matte:kind=ambig
max:kind=ambig
maxim:kind=ambig
mayo:kind=ambig
mic:kind=ambig
morris:kind=ambig
morse:kind=ambig
mort:kind=ambig
natty:kind=ambig
ned:kind=ambig
neptune:kind=ambig
nod:kind=ambig
noel:kind=ambig
norm:kind=ambig
norman:kind=ambig
orion:kind=ambig
oscar:kind=ambig
ottoman:kind=ambig
paddington:kind=ambig
peregrine:kind=ambig
philander:kind=ambig
pierce:kind=ambig
pip:kind=ambig
rag:kind=ambig
reed:kind=ambig
rich:kind=ambig
roar:kind=ambig
rob:kind=ambig
rocky:kind=ambig
rod:kind=ambig
romance:kind=ambig
royale:kind=ambig
russell:kind=ambig
rusty:kind=ambig
scot:kind=ambig
sidney:kind=ambig
silver:kind=ambig
shin:kind=ambig
sim:kind=ambig
slade:kind=ambig
steward:kind=ambig
sultan:kind=ambig
tad:kind=ambig
tate:kind=ambig
teddy:kind=ambig
telly:kind=ambig
tor:kind=ambig
travis:kind=ambig
trent:kind=ambig
troy:kind=ambig
urban:kind=ambig
uzi:kind=ambig
van:kind=ambig
victor:kind=ambig
weed:kind=ambig
will:kind=ambig
winter:kind=ambig
wolf:kind=ambig
wood:kind=ambig
yale:kind=ambig
yen:kind=ambig
miles:kind=ambig
oz
al:kind=ambig
chip:kind=ambig
bill:kind=ambig
franc:kind=ambig
nab:kind=ambig
earnest:kind=ambig
