# Supplementary material for: ScholarLens: extracting competences from research publications for the automatic generation of semantic user profiles
Source: PeerJ journal article supplement (doi:10.7717/peerj-cs.121), 2017-07-03
Supplement: Pipeline.zip [file Pipeline.zip › Pipeline/gate/plugins/ANNIE/resources/gazetteer/person_relig.lst]

God
Jesus
Jesus Christ
Lord Jesus Christ
Lord God
the Holy Ghost
the Holy Spirit
Christ
Nicademus
Nicodemus
Anzakias
