# Supplementary material for: ScholarLens: extracting competences from research publications for the automatic generation of semantic user profiles
Source: PeerJ journal article supplement (doi:10.7717/peerj-cs.121), 2017-07-03
Supplement: Pipeline.zip [file Pipeline.zip › Pipeline/gate/plugins/ANNIE/resources/gazetteer/province_aa.lst]

Zurich
Zug
Zonguldak
Zomba
Ziguinchor
Zhejiang
Zeeland
Zanjan
Zamosc
Zala
Zakinthos
Zaghwan
Zabol
Yunnan
Yozgat
Yogyakara
Yazd
Yamanashi
Yamaguchi
Yamagata
Xizang
Xinjiang
Xanthi
Wyoming
Wyo.
Wroclaw
Woodville
Wloclawek
Wisconsin
Wis.
Wien
Wicklow
Whangaroa
Whangarei
Whakatane
Wexford
Westmeath
Westland
West Virginia
Waverley
Waterford
Wasit
Wash.
Warwick
Warszawa
Wanganui
Wallace
Wales
Walbrzych
Wakayama
Waitotara
Waitomo
Waitaki
Wairoa
Wairewa
Waipukurau
Waipawa
Waipa
Waimea
Waimate
Waimarino
Waimairi
Waikohu
Waikato
Waihemo
Waiheke
Waiapu
Waavu
W. Va.
Vt.
Vrancea
Vorarlberg
Voiotia
Viseu
Virginia
Vincent
Vilcea
Victoria
Viborg
Veszprem
Vestsjaelland
Vestgronland
Vermont
Veneto
Vejle
Vavau
Vaud
Vaslui
Varna
Vardak
Valverde
Valenciana
Valais
Vaisigano
Va.
Uvs
Uva
Utrecht
Utah
Usak
Uri
Urfa
Umbria
Uaboe
U. T.
Tunceli
Tulcea
Tuapeka
Tuamasaga
Truk
Tropoje
Tripura
Trikala
Triesenberg
Triesen
Trarza
Trabzon
Toyama
Tov
Tottori
Toscana
Torun
Tongatapu
Tombouctou
Tombali
Tolna
Tokushima
Tokat
Tochigi
Tobago
Tlemcen
Tiznit
Tirol
Tipperary
Tipaza
Tindouf
Timis
Ticino
Tiaret
Thyolo
Thurgau
Thies
Thesprotia
Thakurgaon
Thaa
Texas
Tex.
Tetouan
Tepelene
Tennessee
Tenn.
Temotu
Teleorman
Tekirdag
Tebessa
Taza
Tawzar
Tauranga
Taupo
Taumarunui
Tatawin
Tata
Tartus
Tarrafal
Taroudannt
Tarnow
Tarnobrzeg
Taranaki
Taounate
Tangail
Tambacounda
Tamanrasset
Takhar
Takamaka
Taizz
Tagant
Tacuarembo
Szolnok
Sylhet
Suwalki
Susah
Sunamganj
Suhl
Suhbaatar
Suceava
Strathallan
Stratford
Storstrom
Steiermark
Srbija
Southland
Southern California
South Dakota
South Carolina
Soufriere
Soriano
Sonderjylland
Somogy
Solothurn
Sofiya
Smiths
Slupsk
Slovenija
Sligo
Skrapar
Skikda
Skierniewice
Sivas
Sitrah
Sirajganj
Sinop
Sindh
Silyanah
Silverpeaks
Sikkim
Sikasso
Siirt
Sieradz
Siedlce
Sicilia
Sichuan
Sibiu
Siberia
Shkoder
Shizuoka
Shiselweni
Shimane
Shiga
Sherpur
Shaviyani
Shariyatpur
Shanxi
Shandong
Shabwah
Shaanxi
Setubal
Settat
Setif
Seti
Serravalle
Serrai
Semnan
Selenge
Segou
Seenu
Scotland
Schwyz
Schwerin
Schellenberg
Schaffhausen
Schaan
Savanne
Satupaitea
Satkhira
Saskatchewan
Sardinia
Sardegna
Sarande
Santarem
Sandys
Sana
Samsun
Samos
Samangan
Samana
Salzburg
Salto
Salima
Salcedo
Salaj
Sakarya
Saitama
Saida
Sagarmatha
Saga
Safaqis
Sadah
Sabaragamuwa
Saarland
S. Dak.
S. C.
Rzeszow
Ruyigi
Rutana
Runanga
Rumphi
Ruhengeri
Ruggell
Rotorua
Rostock
Roskilde
Roscommon
Rodhopi
Rocha
Rize
Rivera
Ringkobing
Rigali
Ribe
Riau
Rhode Island
Rethimni
Relizane
Redonda
Razgrad
Rapti
Rangpur
Rangitikei
Rangiora
Rajshahi
Rajbari
Rajasthan
Raglan
Radom
Raa
R. I.
Quthing
Quinara
Qinghai
Qibili
Qafsah
Qabis
Puntarenas
Punjab
Puke
Puglia
Przemysl
Prospect
Preveza
Praslin
Prahova
Poznan
Potsdam
Porto
Portalegre
Pondicherry
Ponape
Pohnpei
Pohangina
Pogradec
Plovdiv
Plock
Planken
Plaisance
Pirojpur
Piotrkow
Pila
Pieria
Piemonte
Picardie
Piako
Pest
Permet
Peravia
Pennsylvania
Penn.
Pembroke
Pella
Pedernales
Paysandu
Patuakhali
Patea
Parvan
Paphos
Paparua
Panchagar
Pamplemousses
Palauli
Palau
Paktika
Paktia
Pahiatua
Paget
Pabna
Pa.
Oxford
Ovorhangay
Overijssel
Oujda
Ouest
Ouarzazate
Ouargla
Otorohanga
Otamatea
Ostroleka
Ostgronland
Oruzgan
Oroua
Orissa
Oregon
Oreg.
Ore.
Ordu
Ordino
Orange County
Opotiki
Opole
Ontario
Omnogovi
Olt
Olsztyn
Oklahoma
Okla.
Okinawa
Okayama
Oita
Oio
Ohio
Ohinemuri
Offaly
Obwalden
Oberosterreich
O. H.
Nurestan
Ntchisi
Nsanje
Nova Scotia
North Dakota
North Carolina
Nordjylland
Nordgronland
Nord
Noonu
Nograd
Noakhali
Ningxia
Ninawa
Nimruz
Nilphamari
Nigde
Niedersachsen
Niederosterreich
Nidwalden
Nibok
Ngozi
Newfoundland
New Mexico
New Jersey
New Hampshire
New Brunswic
Nevsehir
Nevada
Nev.
Neuchatel
Neubrandenburg
Netrakona
Nebraska
Nebr.
Neamt
Ncheu
Naviyani
Navarra
Nator
Narsingdi
Nariva
Narayani
Narayanganj
Narail
Nara
Naogaon
Nangarhar
Namur
Nagano
Nagaland
Nador
Nabul
Naama
NY
NJ
N. Y.
N. Mex.
N. M.
N. J.
N. H.
N. Dak.
N. C.
Mzimba
Mymensingh
Mwanza
Muyinga
Mus
Mures
Murcia
Muramvya
Munshiganj
Mulanje
Mugla
Moulavibazar
Mostaganem
Mopti
Montana
Mont.
Monaghan
Moluccas
Molise
Mokhotlong
Moka
Moheli
Mo.
Mizoram
Miyazaki
Miyagi
Missouri
Mississippi
Miss.
Mirdite
Minnesota
Minn.
Mila
Mikhaylovgrad
Mie
Micoud
Michigan
Mich.
Messinia
Meneng
Meknes
Meherpur
Mehedinti
Meghalaya
Meemu
Medea
Mechi
Meath
Me.
Md.
Mchinji
Mazandaran
Maysan
Mayo
Mayaro
Mayaguana
Mauren
Matamata
Masterton
Massachusetts
Mass.
Mascara
Maryland
Marrakech
Marlborough
Markazi
Marib
Mardin
Marche
Maramures
Manzini
Manitoba
Manisa
Manipur
Maniototo
Manikganj
Mangonui
Mangochi
Manawatu
Manaia
Malvern
Maluku
Maluka
Maldonado
Malatya
Malaita
Makira
Makedonija
Makamba
Maio
Maine
Maharashtra
Mahakali
Magura
Magnisia
Magdeburg
Mafeteng
Madeira
Madaripur
Madanin
Mackenzie
M. D.
Luzern
Lushnje
Lumbini
Lubombo
Lowgar
Lovech
Louth
Louisiana
Louga
Lorraine
Lorestan
Longford
Long Island
Lomza
Lombardia
Lodz
Litoral
Limousin
Limon
Limburg
Limassol
Liguria
Liege
Librazhd
Liaoning
Lezhe
Levkas
Leszno
Lesvos
Leribe
Leitrim
Leiria
Leipzig
Legnica
Lazio
Laviyani
Lavalleja
Lasithi
Larnaca
Larisa
Laois
Lampung
Lalmonirhat
Laksmipur
Lakshadweep
Lakonia
Lake
Lahij
Laghouat
Laghman
Labrador
Laborie
Laayoune
Laamu
La.
Kyreni
Kyoto
Ky.
Kutahya
Kushtia
Kurigram
Kumamoto
Kukes
Kruje
Krosno
Krakow
Kozani
Koulikoro
Koszalin
Kosrae
Kosi
Korinthia
Kordestan
Korce
Konya
Konin
Kondoz
Konar
Komarom
Kolonje
Kolda
Kochi
Kocaeli
Kiwitea
Kishorganj
Kirundo
Kirsehir
Kirklareli
Kirikkale
Kilkis
Kilkenny
Kildare
Kikladhes
Kielce
Kibuye
Kibungo
Khuzestan
Khulna
Khouribga
Khorasan
Khios
Khenifra
Khenchela
Khemisset
Khaskovo
Khania
Khalkidhiki
Khagrachari
Kerry
Kerman
Kerkira
Kerala
Kentucky
Kenitra
Kefallinia
Kayseri
Kayes
Kayanza
Kavala
Katowice
Kasupe
Kasungu
Kastoria
Kastamonu
Karuzi
Kars
Karonga
Karnten
Karnataka
Karnali
Kardhitsa
Karbala
Karaman
Kapisa
Kaolack
Kansas
Kandahar
Kanagawa
Kan.
Kalisz
Kairanga
Kaikoura
Kagoshima
Kagawa
Kabol
Kaafu
Jura
Jundubah
Jowzjan
Jogjakarta
Jilin
Jijel
Jiangxi
Jiangsu
Jhenaidah
Jhalakati
Jessore
Janakpur
Jambi
Jamalpur
Jaipurhat
Jacksons
Iwate
Isparta
Ishikawa
Irian
Iowa
Ioannina
Inglewood
Indiana
Independencia
Ind.
Inchiri
Inangahua
Inagua
Imathia
Illizi
Illinois
Ill.
Ilia
Ilhas
Ilam
Ijuw
Ifrane
Idlib
Idaho
Icel
Ibb
Ibaraki
Iasi
Ialomita
Ia.
Hyogo
Hutt
Hurunui
Hunedoara
Hunan
Hubei
Hrvatska
Hovsgol
Hovd
Horowhenua
Hormozgan
Hokkaido
Hokianga
Hobson
Hiroshima
Hims
Hikurangi
Hhohho
Heves
Hessen
Heredia
Herat
Hentiy
Henan
Helmand
Heilongjiang
Hebei
Heathcote
Hawera
Hawalli
Hawaii
Hatay
Haryana
Harghita
Hamah
Hamadan
Halle
Halab
Hakkari
Hajjah
Hainaut
Hainan
Hadramawt
Habiganj
Haapai
Gumushane
Gumma
Gujarat
Guizhou
Guidimaka
Guelmim
Guelma
Guarda
Guangxi
Guangdong
Guanacaste
Guadalcanal
Groningen
Grey
Grevenmacher
Grevena
Grenadines
Graubunden
Gramsh
Gorj
Gorgol
Gopalganj
Glarus
Glacis
Gjirokaster
Giurgiu
Gitega
Gitarama
Gisenyi
Giresun
Gilan
Gikongoro
Gifu
Ghowr
Ghazni
Georgia
Geneve
Gelderland
Gazipur
Gaziantep
Gansu
Gandaki
Gamprin
Galway
Galicia
Galati
Gaibandha
Gagaifomauga
Gagaemauga
Gabu
Ga.
Fyn
Fukushima
Fukuoka
Fukui
Fujian
Fthiotis
Friesland
Fribourg
Frederiksborg
Frankfurt
Fontvieille
Fokis
Fogo
Florina
Florida
Flores
Flevoland
Flacq
Fla.
Fla
Fiorentino
Figuig
Fier
Fes
Feni
Fejer
Featherston
Fatick
Faryab
Farwaniyyah
Fars
Faro
Faridpur
Farah
Famagusta
Faetano
Faasaleleaga
Faafu
Eyre
Exuma
Extremadura
Ewa
Evvoia
Evros
Evritania
Evora
Essaouira
Espaillat
Eskisehir
Esfahan
Eschen
Erzurum
Erzincan
Erfurt
Erdenet
England
Encamp
Eltham
Ellesmere
Eleuthera
Elblag
Elbasan
Elazig
Eketahuna
Ehime
Egmont
Edirne
East Coast
Dzavhan
Durazno
Dundgovi
Dubayy
Duarte
Dresden
Drenthe
Drama
Dowa
Dornogovi
Dornod
Donegal
Domagnano
Dolj
Djogjakarta
Djelfa
Djambi
Diyarbakir
Diyala
District of Columbia
Diourbel
Dinajpur
Dimbovita
Dimashq
Diekirch
Dibre
Dhodhekanisos
Dhawalagiri
Dhamar
Devonshire
Dennery
Denizli
Denigomodu
Delhi
Delaware
Del.
Dedza
Dauphin
Darhan
Dara
Dannevirke
Dajabon
Dahuk
Daalu
D. C.
Czestochowa
Cyangugu
Curepipe
Csongrad
Covasna
Cottbus
Corum
Corse
Cork
Constantine
Constanta
Connecticut
Conn.
Comilla
Colorado
Colonia
Colo.
Col.
Coimbra
Clutha
Cluj
