# Supplementary material for: ScholarLens: extracting competences from research publications for the automatic generation of semantic user profiles
Source: PeerJ journal article supplement (doi:10.7717/peerj-cs.121), 2017-07-03
Supplement: Pipeline.zip [file Pipeline.zip › Pipeline/gate/plugins/ANNIE/resources/gazetteer/province_ab.lst]

Clifton
Ciechanow
Cibitoke
Chuadanga
Choiseul
Chlef
Chitipa
Chiradzulu
Chikwawa
Chiesanuova
Chiba
Cheviot
Chelm
Chattagram
Chaouen
Chandpur
Chandigarh
Cavan
Cataluna
Cascade
Cartago
Caroni
Carlow
Cape Canaveral
Cantabria
Cankuzo
Cankiri
Canillo
Canelones
Canarias
Canakkale
Campania
California
Calif.
Calarasi
Calabria
Cacheu
Byumba
Bydgoszcz
Buzau
Butare
Bushehr
Bururi
Bursa
Burgenland
Burgas
Burdur
Buller
Bulgan
Bucuresti
Bubanza
Buada
British Columbia
British Colombia
Bretagne
Bremen
Brava
Brasov
Brakna
Braila
Brahmanbaria
Braganca
Braga
Brabant
Bourgogne
Boumerdes
Boulemane
Bouira
Botosani
Bornholm
Borguna
Bordjbou
Bolu
Bolama
Bogra
Blida
Blantyre
Bitlis
Biskra
Biombo
Bingol
Biminis
Bilecik
Bihor
Bihar
Bialystok
Bhola
Bheri
Berea
Berat
Bengkulu
Bekes
Bejaia
Beja
Bechar
Bayrut
Bayern
Bayburt
Bayanhongor
Batna
Basilicata
Barisal
Barbuda
Baranya
Barahona
Baoruco
Bandarban
Bamian
Balzers
Balochistan
Balkh
Balikesir
Bali
Bakhtaran
Bajah
Baja
Baiti
Bagmati
Baghlan
Bagerhat
Bafata
Badghis
Badakhshan
Bacau
Babil
Baa
Azua
Azilal
Aydin
Aveiro
Auvergne
Atua
Attiki
Atjeh
Asturias
Assam
Ashburton
Ascension
Aryanah
Artvin
Artigas
Artibonite
Arta
Arkansas
Arkadhia
Ark.
Arizona
Ariz.
Arima
Arhus
Arhangay
Argolis
Arges
Arbil
Aragon
Arad
Aquitaine
Aomori
Antalya
Anjouan
Anibare
Anhui
Anetan
Andalucia
Anabar
Amuri
Amasya
Alsace
Aliff
Alberta
Alba
Alaska
Alas.
Alajuela
Alabama
Ala.
Aksaray
Akita
Akhaia
Akaroa
Ajman
Aiwo
Aichi
Afyon
Adrar
Adiyaman
Adana
Adan
Acquaviva
Acores
Aceh
Abyan
Abruzzi
Abaco
Aargau
Aana
