# Supplementary material for: ScholarLens: extracting competences from research publications for the automatic generation of semantic user profiles
Source: PeerJ journal article supplement (doi:10.7717/peerj-cs.121), 2017-07-03
Supplement: Pipeline.zip [file Pipeline.zip › Pipeline/gate/plugins/ANNIE/resources/gazetteer/stop.lst]

About
And
Because
By
Can
First
For
From
He
Here
I
It
May
Next
Of
Perhaps
Please
Shall
She
So
That
Then
They
We
Will
With
Without
You
Don't
