# Supplementary material for: ScholarLens: extracting competences from research publications for the automatic generation of semantic user profiles
Source: PeerJ journal article supplement (doi:10.7717/peerj-cs.121), 2017-07-03
Supplement: Pipeline.zip [file Pipeline.zip › Pipeline/gate/plugins/ANNIE/resources/gazetteer/title.lst]

Chancellor
Councillor
Detective
Detective Inspector
Doctor
Dr
Dr.
Inspector
Judge
Justice
Messrs
Messrs.
Prof.
Professor
Sen.
Senator
President
