# Supplementary material for: ScholarLens: extracting competences from research publications for the automatic generation of semantic user profiles
Source: PeerJ journal article supplement (doi:10.7717/peerj-cs.121), 2017-07-03
Supplement: Pipeline.zip [file Pipeline.zip › Pipeline/gate/plugins/ANNIE/resources/gazetteer/title_lowercase.lst]

business unit manager
chairman
chancellor
chief administrative officer
chief executive
chief executive officer
chief financial officer
chief operating officer
co-chairman
co-chief executive officer
communications director
controller
deputy chairman
deputy general manager
director - business development
director - product management
director - system / field test
director of human resources
director of marketing
director of marketing communications
director, product group
executive
executive director - product development
executive vice president
executive vice president - Europe
executive vice presidents
finance chief
finance director
founding chairman
general counsel
general manager
group executive
group president
head
human-resources vice president
judge
leader
managing director
minister
monsieur
negotiator
non-executive chairman
nonexecutive chairman
president
secretary
secretary-general
senior vice president
treasurer
vice chairman
vice president
vice president of business / market planning & development
vice president of sales and marketing
vice-chairman
