# Supplementary material for: ScholarLens: extracting competences from research publications for the automatic generation of semantic user profiles
Source: PeerJ journal article supplement (doi:10.7717/peerj-cs.121), 2017-07-03
Supplement: Pipeline.zip [file Pipeline.zip › Pipeline/gate/plugins/ANNIE/resources/gazetteer/title_male.lst]

Marquis
Messr
Messr.
Monsieur
Mr
Mr.
Prince
Rabbi
Sheik
Sir
Lord
Ayatollah
Rev.
Reverend
Bishop
Archbishop
Baron
Lord Chief Justice
Right Hon
Right Hon.
