# Supplementary material for: ScholarLens: extracting competences from research publications for the automatic generation of semantic user profiles
Source: PeerJ journal article supplement (doi:10.7717/peerj-cs.121), 2017-07-03
Supplement: Pipeline.zip [file Pipeline.zip › Pipeline/gate/plugins/ANNIE/resources/gazetteer/title_mil.lst]

1ST Lieutenant
1ST Lt
1ST Lt.
1st Lieutenant
1st Lt
1st Lt.
2ND Lieutenant
2ND Lt
2ND Lt.
2nd Lieutenant
2nd Lt
2nd Lt.
Able Rating
Able Seaman
Able Seawoman
Acting P.O.
Acting PO
Acting Pilot Officer
Adm
Adm Of The Fleet
Adm of the Fleet
Adm.
Adm. Of The Fleet
Adm. of the Fleet
Admiral
Admiral Of The Fleet
Admiral of the Fleet
Air Cdre
Air Cdre.
Air Chief Marshal
Air Commodore
Air Marshal
Air Vice-Marshal
Aircraftman
Aircraftsman
Aircraftswoman
Aircraftwoman
Brig
Brig.
Brigadier
Capt
Capt.
Captain
Cdr
Cdr.
Cdre
Cdre (1ST Class)
Cdre (1ST class)
Cdre (1st Class)
Cdre (1st class)
Cdre (2ND Class)
Cdre (2ND class)
Cdre (2nd Class)
Cdre (2nd class)
Cdre (First Class)
Cdre (Second Class)
Cdre (Second class)
Cdre (first class)
Cdre 1ST Class
Cdre 1ST class
Cdre 1st Class
Cdre 1st class
Cdre 2ND Class
Cdre 2ND class
Cdre 2nd Class
Cdre 2nd class
Cdre First Class
Cdre Second Class
Cdre Second class
Cdre first class
Cdre.
Chief Of Staff
Chief Petty Officer
Chief Superintendent
Chief of Staff
Cmdr.
Col
Col.
Colonel
Colour Sergeant
Colour Serjeant
Comdr.
Commander
Commodore
Commodore (1ST Class)
Commodore (1ST class)
Commodore (1st Class)
Commodore (1st class)
Commodore (2ND Class)
Commodore (2ND class)
Commodore (2nd Class)
Commodore (2nd class)
Commodore (First Class)
Commodore (Second Class)
Commodore (Second class)
Commodore (first class)
Commodore 1ST Class
Commodore 1ST class
Commodore 1st Class
Commodore 1st class
Commodore 2ND Class
Commodore 2ND class
Commodore 2nd Class
Commodore 2nd class
Commodore First Class
Commodore Second Class
Commodore Second class
Commodore first class
Communications Officer
Corporal
Deputy And Assistant Commissioner
Deputy And Assistant commissioner
Deputy Assistant Commissioner
Deputy and Assistant Commissioner
Deputy and Assistant commissioner
F.O.
FO
Field Marshal
First Lieutenant
First Lt
First Lt.
Fleet Chief Petty Officer
Flight Lieutenant
Flight Sergeant
Flight Serjeant
Flt Lt
Flt. Lt.
Flying Officer
Fst Lt
Fst. Lt.
Gen
Gen.
General
Gp Capt
Gp. Capt.
Group Captain
Grp Capt
Grp. Capt.
Général
Junior Rating
Junior Seaman
Junior Seawoman
Junior Technician
Lance Corporal
Leading Aircraftman
Leading Aircraftsman
Leading Aircraftswoman
Leading Aircraftwoman
Leading Rating
Leading Seaman
Leading Seawoman
Lieutenant
Lieutenant Colonel
Lieutenant General
Lieutenant Général
Lieutenant-Colonel
Lieutenant-Commandant
Lieutenant-Commander
Lieutenant-General
Lieutenant-Général
Lt
Lt Cdr
Lt Col
Lt Gen
Lt-Cdr
Lt-Col
Lt-Col.
Lt-Gen
Lt-Gen.
Lt.
Lt. Cdr.
Lt. Col.
Lt. Gen.
Maj
Maj Gen
Maj-Gen
Maj-Gen.
Maj.
Maj. Gen
Major
Major General
Major-General
Marshal Of The R.A.F.
Marshal Of The RAF
Marshal of the R.A.F.
Marshal of the RAF
Maréchal
Master Sergeant
Master Serjeant
Master Sgt.
Midshipman
Midshipwoman
P.O.
Petty
Petty Officer
Pilot Officer
Priv
Priv.
Private
Pte
Pte.
Rear Adm
Rear Adm.
Rear Admiral
Rear-Adm
Rear-Adm.
Rear-Admiral
Sec Lt
Sec. Lt.
Second Lieutenant
Second Lt
Second Lt.
Senior Aircraftman
Senior Aircraftsman
Senior Aircraftswoman
Senior Aircraftwoman
Senior General
Sergeant
Sergeant At Arms
Sergeant Major
Sergeant at Arms
Serjeant
Serjeant At Arms
Serjeant Major
Serjeant at Arms
Sgt.
Sous-Lieutenant
Sqd Ldr
Sqd. Ldr.
Squ Ldr
Squ. Ldr.
Squadron Leader
Staff Sergeant
Staff Serjeant
Sub Lt
Sub-Lieutenant
Sub-Lt
Sub. Lt.
Tech Sgt
Tech. Sgt.
Vice Adm
Vice Adm.
Vice Admiral
Vice-Adm
Vice-Adm.
Vice-Admiral
Warrant Officer
Wg Cdr
Wg. Cdr.
Wing Cdr
Wing Cdr.
Wing Commander
admiral
amiral
capitaine
captain
colonel
commandant
commander
lieutenant
sergeant
sergent
serjeant
