# Supplementary material for: ScholarLens: extracting competences from research publications for the automatic generation of semantic user profiles
Source: PeerJ journal article supplement (doi:10.7717/peerj-cs.121), 2017-07-03
Supplement: Pipeline.zip [file Pipeline.zip › Pipeline/gate/plugins/ANNIE/resources/gazetteer/title_pol.lst]

WPC
Woman Police Constable
W.P.C.
W. P. C.
W.P.C.
Superintendent
Super Intendent
Special Constable
Special Agent
Serjeant
Sergent
sergent
sergeant
Sergeant
Police Constable
PC
P.C.
P. C.
P.C.
Inspector
DS
DI
Detective Serjeant
Detective Sergeant
Detective Inspector
Detective Constable
Detective Chief Inspector
Detective Chief Constable
Detective
Det. Sgt.
Det. Serg.
Det. Insp.
Det. Const.
Det. Ch. Insp.
Det Sgt
Det Serg
Det Insp
Det Const
Det Ch Insp
Det. Sgt.
Det. Serg.
Det. Insp.
Det. Const.
Det. Ch. Insp.
desk serjeant
Desk Serjeant
desk Serjeant
desk Sergeant
desk sergeant
Desk Sergeant
Deputy Chief Inspector
Deputy Chief Constable
DCI
DC
D.S.
D.I.
D.C.I.
D.C.
D. S.
D. C. I.
D. C.
D.S.
D.I.
D.C.I.
D.C.
Crime Prevention Officer
Constable
Communications Officer
Commissioner
Commissar
Commissaire
Chief Superintendent
Chief Inspector
Chief Constable
Chief Commissioner
Brigadier
