# Supplementary material for: ScholarLens: extracting competences from research publications for the automatic generation of semantic user profiles
Source: PeerJ journal article supplement (doi:10.7717/peerj-cs.121), 2017-07-03
Supplement: Pipeline.zip [file Pipeline.zip › Pipeline/gate/plugins/ANNIE/resources/gazetteer/water.lst]

Pacific
North Atlantic
New York Harbor
Indian Ocean
Gulf of Mexico
Great Lakes
Everglades
Caribbean
Bay of Biscay
Atlantic
Arctic
Antarctic
Nile
Amazon
Thames
