# Supplementary material for: ScholarLens: extracting competences from research publications for the automatic generation of semantic user profiles
Source: PeerJ journal article supplement (doi:10.7717/peerj-cs.121), 2017-07-03
Supplement: Pipeline.zip [file Pipeline.zip › Pipeline/gate/plugins/ANNIE/resources/heptag/lexicon_all]

`` ``
` ``
- :
– :
-- :
, ,
; :
: :
! .
? .
. .
... :
'' ''
" ''
( (
) )
{ (
} )
$ $
# #
0.0002 CD
0.0003 CD
0.0015 CD
0.0018 CD
0.0040 CD
0.0047 CD
0.0055 CD
0.0075 CD
0.0085 CD
0.0100 CD
0.0108 CD
0.0115 CD
0.0182 CD
0.01 CD
0.025 CD
0.02 CD
0.0343 CD
0.03 CD
0.05 CD
-0.06 CD
0.06 CD
0.07 CD
0.10 CD
0.11 CD
0.12 CD
0.13 CD
0.14 CD
0.15 CD
0.16 CD
0.17 CD
0.18 CD
0.19 CD
0.1 CD
0.20 CD
0.22 CD
0.23 CD
0.24 CD
0.25 CD
0.26 CD
0.272 CD
0.27 CD
0.28 CD
0.2 CD
0.30 CD
0.31 CD
0.32 CD
0.35 CD
0.36 CD
0.375 CD
0.37 CD
0.39 CD
0.3 CD
0.43 CD
0.44 CD
0.45 CD
0.47 CD
0.48 CD
0.4 CD
0.50 CD
0.51 CD
0.53 CD
0.54 CD
0.55 CD
0.56 CD
0.57 CD
0.58 CD
0.59 CD
0.5 CD
0.60 CD
0.628394 CD
0.6287 CD
0.63 CD
0.65 CD
0.66 CD
0.6 CD
0.70 CD
0.71 CD
0.73 CD
0.75 CD
0.76 CD
0.7 CD
0.82 CD
0.84 CD
0.85 CD
0.86 CD
0.88 CD
0.89 CD
0.8 CD
0.91 CD
0.92 CD
0.94 CD
0.95 CD
0.99 CD
0.9 CD
0 CD
100,000 CD
100,000-GUEST JJ
10,000 CD
10,000-CIRCULATION JJ
10,004 CD
100.05 CD
1,000 CD
1000 CD
1,000-SHIP JJ
1,001 CD
10.01 CD
100.2 CD
1,003,884 CD
10.03 CD
100.4 CD
10.05 CD
100.5 CD
100.625 CD
10.06.89 CD
10:08 CD
10.08 CD
100.8 CD
100.96 CD
100,980 CD
10.09 CD
100-ACRE JJ
1:00 CD
100 CD
100-FOOT-LONG JJ
100-MEGABYTE JJ
100-MEMBER JJ
100-MILE JJ
100%-OWNED JJ
100-POINT-EQUIVALENCY JJ
100-POINT JJ
100-POINT-PLUS JJ
100-SHARE JJ NNP
100-Share NNP
100-stock JJ CD
100-STOCK JJ CD
100th JJ
100TH JJ
100-YEAR-OLD JJ
10,100,000 CD
101,000 CD
1,010 CD
10:10 CD
1.011 CD
10-11 CD
10.11 CD
101.225 CD
101,250 CD
10.125 CD
1,012 CD
10.12 CD
10%-12 CD
1,013 CD
10.13 CD
101.45 CD
1,014 CD
10.14 CD
101.4 CD
1,015 CD
10:15 CD
101.5 CD
101.60 CD
10.16 CD
101.75 CD
1017.69 CD
10.17 CD
101.7 CD
101.80 CD
101.90 CD
101.95 CD
101.98 CD
10.19 CD
1.01 CD
10.1 CD
101 CD
101-YEAR-OLD JJ
102,000 CD
102.01 CD
102.06 CD
102.1 CD
1,022,000 CD
102.25 CD
10:25 CD
102.5 CD
102.625 CD
1,026.46 CD
1,027 CD
1.02 CD
10-2 CD
10.2 CD
102 CD
103,000 CD
10,300 CD
103.05 CD
1,030 CD
10:30 CD
10.30 CD
103.1 CD
10\/32 CD
10:33 CD
10.33 CD
1,035,000 CD
10.35 CD
10.375 CD
10.37 CD
10.38 CD
103.98 CD
1.03 CD
10.3 CD
103 CD
103-NATION JJ
1,040 CD
10:40 CD
10.40 CD
104.1 CD
10.43 CD
10.44 CD
10,450,000 CD
1.045 CD
10:45 CD
104.75 CD
104.79 CD
1,048,500,000 CD
10.485 CD
10.48 CD
104.8 CD
1.04 CD
10.4 CD
104 CD
1,050,000 CD
105,000 CD
1,050 CD
10.50 CD
105.2 CD
105.39 CD
105.4 CD
10.5625 CD
1,059.04 CD
10.59 CD
1.05 CD
10.5 CD
105 CD
106.06 CD
106,100 CD
10.625 CD
1,062 CD
10.62 CD
106.2 CD
1,063,946 CD
10.66 CD
106.6 CD
10,674,500 CD
106.7 CD
1,068,000 CD
1069 NNP
1.06 CD
10.6 CD
106 CD
1,070,000 CD
107.03 CD
107,100 CD
10.72 CD
1,074 CD
1,075,000 CD
107.50 CD
10.75 CD
10.77 CD
107.87 CD
10.78 CD
107.8 CD
107.9 CD
1.07 CD
10.7 CD
107 CD NNP
108.1 CD
108.28 CD
108.2 CD
10.83 CD
108.3 CD
108.4 CD
108.625 CD
10.86 CD
108.6 CD
10,873 CD
10.875 CD
1,087 CD
108.8 CD
1.08 CD
10.8 CD
108 CD
108-POINT JJ
108-YEAR-OLD JJ
109,000 CD
109.25 CD
10.93 CD
109.4 CD
109.50 CD
10.958 CD
10.95 CD
109.66 CD
109.73 CD
10.97 CD
109.85 CD
10.98 CD
1099 CD
1.09 CD
10.9 CD
109 CD
10-A-SHARE JJ
1.0 CD
10 CD
10-CENT-A-SHARE JJ
10-DAY JJ
10-FOLD JJ
10-GALLON JJ
10-K JJ
10K JJ
10-LAP JJ
10-MEMBER JJ
10-MONTH JJ
10-MONTH-LONG JJ
10%-OWNED JJ
10-POINT JJ
10-SQUARE-MILE JJ
10-STEP JJ
10-STORE JJ
10TH-BIGGEST JJ
10th JJ
10TH JJ
10-TO-1 JJ
10-WEEK JJ
10-year JJ CD
10-YEAR JJ CD
10-YEAR-OLD JJ
110,000 CD
11,000 CD
1,100 CD
1,100-PARCEL-A-WEEK JJ
11.01 CD
110.1 CD
1,103.11 CD
11.04 CD
110.4 CD
110.625 CD
110.6 CD
11.07 CD
1,108 CD
11:08 CD
11.08 CD
110.9 CD
1.10 CD
11.0 CD
110 CD
110-LAWYER JJ
110-STORY JJ
1\/10th NN
1\/10TH NN
111,000 CD
11.10 CD
11,116 CD
1,111 CD
11.11 CD
11.125 CD
111.2 CD
11:13 CD
11.13 CD
11,141,711 CD
111.48 CD
11150 CD
11:15 CD
11\/16 CD
1,118 CD
111.9 CD
1:11 CD
1.11 CD
11.1 CD
111 CD
112,000 CD
1,120,317 CD
1,120 CD
112.16 CD
112.2 CD
112,383 CD
1,124 CD
112.50 CD
1.125 CD
11.25 CD
112.5 CD
112.625 CD
1.1270 CD
1.1280 CD
11.28 CD
112.9 CD
1.12 CD
11-2 CD
11.2 CD
112 CD
1,130 CD
11:30 CD
11\/32 CD
113.2 CD
11.38 CD
11,390,000 CD
1.13 CD
11.3 CD
113 CD
1,141 CD
11.41 CD
11,429,243 CD
1.142 CD
114.2 CD
1,143 CD
1.143 CD
114.3 CD
11.44 CD
114.4 CD
11,450 CD
114.5 CD
114.63 CD
114.6 CD
114.76 CD
114.7 CD
1.14 CD
11.4 CD
114 CD
1,150,000 CD
115,000-SQUARE-FOOT JJ
1,150 CD
11.50 CD
1.1510 CD
11.53 CD
11:54 CD
1,155 CD
11.56 CD
11.57 CD
1.1580 CD
11,580 CD
11,586 CD
11:59 CD
1.15 CD
11.5 CD
115 CD
116,000 CD
11.60 CD
11.625 CD
116,385,000 CD
116.3 CD
116.4 CD
1.1650 CD
116.56 CD
11.66 CD
116.7 CD
1.168 CD
116.8 CD
116.91 CD
116.9 CD
1.16 CD
1\/16 CD
11.6 CD
116 CD
116th NNP
116TH NNP
11,700 CD
11.71 CD
11.72 CD
117.2 CD
117.375 CD
117.3 CD
11,742,368 CD
1,174 CD
11.75-A-SHARE JJ
1.175 CD
11,762 CD
1,177,000 CD
11,775,000 CD
117.7 CD
117.94 CD
11,795 CD
11.79 CD
117.9 CD
117-ACRE JJ
1.17 CD
11.7 CD
117 CD
11.80 CD
11,820,000 CD
118.6 CD
11.88 CD
1.18 CD
11.8 CD
118 CD
1190.43 CD
11.90 CD
1191.86 CD
11.91 CD
119.2 CD
11.95 CD
1.1960 CD
119.88 CD
1199.32 CD
1.19 CD
11.9 CD
119 CD
11-A-SHARE JJ
1.1 CD
11 CD NNP
11-CLASS JJ
11-MEMBER JJ
11-MONTH-OLD JJ
11-POINT JJ
11TH-BIGGEST JJ
11TH-GRADE JJ
11TH-HOUR JJ
11th JJ
11TH JJ
11-WEEK JJ
11-YEAR JJ
1,200,000 CD
120,000 CD
120,000-EMPLOYEE JJ
12,000 CD
12,006,883 CD
1,200 CD
1200 CD
1,200-YEAR-OLD JJ
120-140 CD
12,017,724 CD
12:01 CD
120.1 CD
120.2 CD
1205.01 CD
1205.19 CD
12.05 CD
1206.26 CD
12:06 CD
120.6 CD
120.75 CD
12:07 CD
120.7 CD
120.8 CD
12,092 CD
12.09 CD
120-A-SHARE JJ
1:20 CD
1.20 CD
1\/20 CD
120 CD
120-DAY JJ
120-MEGABYTE JJ
1210.70 CD
12.10 CD
12.125 CD
12.12 CD
121.2 CD
1,214 CD
12:15 CD
121.6 CD
12,190,000 CD
1.21 CD
12.1 CD
121 CD
1,222 CD
122.36 CD
1,224 CD
122.4 CD
12,252 CD
12.25 CD
122,700 CD
12,275 CD
122.7 CD
12,281 CD
12,283,217 CD
1.22 CD
12.2 CD
122 CD
12-2 RB
123,000 CD
1230.80 CD
123.1 CD
12\/32 CD
1,234,100 CD
1.2345 CD
12,345 CD
1,235 CD
123.5 CD
1236.66 CD
123.6 CD
12.375 CD
123.7 CD
12:38 CD
12.38 CD
123.8 CD
12.39 CD
123.9 CD
1.23-A-POUND JJ
1.23 CD
12.3 CD
123 CD
1-2-3 NNP JJ
124,000 CD
1,240 CD
124.2 CD
12.43 CD
1,244 CD
12.44 CD
12.45 CD
124.5 CD
12,470,000 CD
124,732 CD
1247.87 CD
124,875 CD
12:48 CD
12.48 CD
12:49 CD
12.49 CD
1.24 CD
12.4 CD
124 CD
124-YEAR-OLD JJ
12,500,000 CD
1,250,000 CD
125,000 CD
12,500 CD
125,075 CD
1,250 CD
12.50 CD
125.1 CD
12.52 CD
1254.27 CD
12:54 CD
1.255 CD
12,573,758 CD
12.57 CD
125.7 CD
125,849 CD
12,591 CD
125-A-SHARE JJ
125-BILLION-A-YEAR JJ
.125 CD
1.25 CD
12.5 CD
125 CD
126,000 CD
12.60 CD
126.15 CD
126.1 CD
1,263,000 CD
1263.51 CD
1.2645 CD
126,630,000 CD
126.68 CD
12.66 CD
126.6 CD
12.68 CD
1.26 CD
12.6 CD
126 CD
127.03 CD
1,271 CD
127,446 CD
1.2745 CD
12.74 CD
1,275,000 CD
12.75 CD
127.5 CD
12.76 CD
12.78 CD
1.2795 CD
1.27 CD
12.7 CD
127 CD
128.19 CD
128.1 CD
12,822,563 CD
12.82 CD
128.6 CD
12.875 CD
128.7 CD
128.9 CD
1.28 CD
12.8 CD
128 CD
12.8-POUND JJ
1,290 CD
12,915,000 CD
129.22 CD
129.24 CD
129.25 CD
12.9375 CD
129.38 CD
129.3 CD
129.48 CD
129.49 CD
12.94 CD
12.95 CD
1,296,000 CD
129.62 CD
129.63 CD
1.2965 CD
1,296,800 CD
129.6 CD
129.72 CD
12.97 CD
129.84 CD
129.87 CD
1,298 CD
12.98 CD
129.90 CD
129.91 CD
129.97 CD
1.29 CD
12.9 CD
129 CD
12-BED JJ
1.2 CD
1\/2 CD
12 CD
12-CENT-A-SHARE JJ
12-COUNT JJ
12-COUNTY JJ
12-DAY JJ
1\/2-FOOT-TALL JJ
12-inches NNS
12-INCHES NNS
1\/2-INCH JJ
12-MEMBER JJ
1\/2-MILE JJ
12-MINUTE JJ
12-MONTH JJ
12-pack NN
12-PACK NN
12-POINT JJ
1\/2-ROOM JJ
12-STORY-HIGH JJ
12th JJ
12TH JJ
12TH-WORST JJ
1\/2-WEEK JJ
12-YEAR JJ
1\/2-year JJ CD
1\/2-YEAR JJ CD
12-YEAR-OLD JJ
1,300,000 CD
130,000 CD
13,000 CD
130.09 CD
1,300 CD
1,300-MEMBER JJ
130.13 CD
130.16 CD
130.1 CD
130.25 CD
13.02 CD
130.2 CD
130.36 CD
1304.23 CD
130.46 CD
13,056 CD
13.05 CD
1:30-6 CD
130.6 CD
130.73 CD
130.76 CD
13.07 CD
130.7 CD
130.80 CD
130.875 CD
1:30 CD
1.30 CD
130 CD
130-LAWYER JJ
130-UNIT JJ
131.01 CD
131.04 CD
1,310 CD
131,146 CD
13,120 CD
13-12 CD
131.34 CD
131.3 CD
13.15 CD
131.64 CD
13\/16 CD
13.18 CD
1.31 CD
13.1 CD
131 CD
132,000 CD
132.00 CD
1.3210 CD
132.1 CD
13,249 CD
1,325,900 CD
13.25 CD
132,620,000 CD
13.26 CD
132.6 CD
1,327 CD
13.27 CD
132.8 CD
132.9 CD
132-ACRE JJ
1.32 CD
1\/32 CD
13.2 CD
132 CD
133.1 CD
13.32 CD
13\/32 CD
13.34 CD
133.4 CD
13.35 CD
133.7 CD
133.8 CD
13.39 CD
1.33 CD
13.3 CD
133 CD
134,000 CD
13,400 CD
1,342,264 CD
1.342 CD
134.2 CD
13,433 CD
13.44 CD
134,550 CD
134,750,000 CD
134.8 CD
134.9 CD
1.34 CD
13.4 CD
134 CD
134-LAWYER JJ
1,350,000 CD
135,000 CD
135.09 CD
13.50 CD
1,351,662 CD
135.2 CD
135.3 CD
135.6 CD
13,575 CD
13.57 CD
135,860,000 CD
135.9 CD
1.35 CD
13.5 CD
135 CD
136,000 CD
13.625 CD
136.28 CD
13.63 CD
13.64 CD
136.4 CD
1,365,226 CD
13.65 CD
13.67 CD
136,800 CD
1,368 CD
1.36 CD
13.6 CD
136 CD
136-PAGE JJ
136-YEAR-OLD JJ
13.71 CD
137,200 CD
137.20 CD
137.2 CD
13.73 CD
137.4 CD
137,550,000 CD
1.375 CD
13.75 CD
137.5 CD
1,376 CD
137.6 CD
13.78 CD
137.8 CD
13.79 CD
1.37 CD
13-7 CD
13.7 CD
137 CD
1,380,000 CD
13.81 CD
1,384,119 CD
138.4 CD
13.851 CD
1385.72 CD
138.625 CD
13,865,000 CD
1.388 CD
1.38 CD
13.8 CD
138 CD
13.90 CD
139.10 CD
139.30 CD
13.94 CD
139.75 CD
13.97 CD
139.8 CD
139.95 CD
1.39 CD
13.9 CD
139 CD
1.3 CD
13 CD
13D CD
13-HOUR JJ
13-NATION JJ
13-POINT JJ
13-POUND JJ
13th JJ NNP NN
13TH JJ NNP NN
13-WEEK JJ
1,400,000 CD
140,000 CD
14,000 CD
1,400 CD
14.00 CD
1,400-LAWYER JJ
1,400-MEMBER JJ
140.106 CD
140.1 CD
1,402,000 CD
1406.29 CD
14.06 CD
140.73 CD
140.74 CD
140.90 CD
140.91 CD
140.95 CD
140.97 CD
14,099 CD
1.40 CD
140 CD
140-POINT JJ
14.11 CD
141.1 CD
14.125 CD
141.33 CD
141.35 CD
14.13 CD
141.45 CD
141.50 CD
141.52 CD
141.55 CD
141.57 CD
141.60 CD
141.65 CD
141.70 CD
141.80 CD
141.85 CD
141.8 CD
141,903 CD
141.90 CD
141.93 CD
141.95 CD
141.9 CD
1.41 CD
14.1 CD
141 CD
142.02 CD
142.10 CD
142,117 CD
142-143.50 CD
142.15 CD
142.17 CD
142.25 CD
14.22 CD
142.2 CD
142.32 CD
142.3 CD
142.40 CD
142.43 CD
14.24 CD
142.4 CD
1,425,035 CD
142.55 CD
14.25 CD
142.5 CD
14.26 CD
142.70 CD
142.75 CD
14.27 CD
142.7 CD
142.80 CD
142.84 CD
142.85 CD
14.28 CD
142.95 CD
1.42 CD
14.2 CD
142 CD
142-PAGE JJ
1,430,000 CD
143,000 CD
143.08 CD
1,430 CD
143,178 CD
14.31 CD
14\/32 CD
143.4 CD
143,534 CD
1,435 CD
143.60 CD
143.6 CD
14.375 CD
143,800 CD
143.80 CD
143.88 CD
143.93 CD
1.439 CD
1.43 CD
14.3 CD
143 CD
144.17 CD
144.1 CD
144.35 CD
14.43 CD
14.44 CD
144.4 CD
144.57 CD
144.5 CD
144.60 CD
144,610 CD
144.80 CD
144.9 CD
1.44 CD
14.4 CD
144 CD
14,505 CD
1,450,635 CD
1,450 CD
14.50 CD
145-150 CD
145.21 CD
145.2 CD
14.53 CD
145.45 CD
14.54 CD
145.4 CD
1,455,000 CD
14,560,000 CD
1.457 CD
145.7 CD
14,580,000 CD
1,458,000 CD
145,954 CD
145.96 CD
1.45 CD
14.5 CD
145 CD
1,460 CD
14.60 CD
1462.93 CD
146.3 CD
1.465 CD
1466.29 CD
14.66 CD
146.6 CD
146.8 CD
1.46 CD
14.6 CD
146 CD
14.70 CD
147,121 CD
1472.76 CD
147,300-SHARE JJ
1,475,000 CD
14.75 CD
147.5 CD
14.76 CD
147.6 CD
147.874 CD
14,789,000 CD
1.47 CD
14.7 CD
147 CD
148,000 CD
1,480 CD
14,821 CD
1482.62 CD
1,482 CD
14.85 CD
148.5 CD
148.85 CD
148.9 CD
148-A-SHARE JJ
1.48 CD
14.8 CD
148 CD
1,490 CD
14.90 CD
14.933 CD
149.3 CD
14.95 CD
149.5 CD
149.69 CD
149.6 CD
14.97 CD
14.99 CD
149.9 CD
1.49 CD
14.9 CD
149 CD
1.4 CD
1\/4 CD
14 CD
14. CD
14-FOOT JJ
14-HOUR JJ
1\/4-INCH JJ
14-JUDGE JJ
14-MONTH JJ
14-POINT JJ
14-POUND JJ
14-Sept. NNP
14-SEPT. NNP
14-SHIP JJ
14th JJ
14TH JJ
14-YEAR JJ
14-YEAR-OLD JJ
1,500,000 CD
150,000-BARREL-A-DAY JJ
150,000 CD
150,000-SQUARE-FOOT JJ
15,000 CD
150.00 CD
15,000-FOOT JJ
1,500 CD
1500 CD
15,015,000 CD
15.02 CD
150.2 CD
150.3 CD
15.06 CD
1507.37 CD
150.7 CD
150.8 CD
15.09 CD
1.50 CD
150 CD
150-FOOT-TALL JJ
150-MEGAWATT JJ
150-MEMBER JJ
150-PLUS JJ
150-POINT JJ
150th JJ
150TH JJ
151,000 CD
1,510 CD
151.20 CD
15.125 CD
151.2 CD
15\/16 CD
151.8 CD
1.51 CD
15.1 CD
151 CD
152,000 CD
152.08 CD
1,520 CD
1523.22 CD
15.25 CD
15,261 CD
15.27 CD
1.52 CD
15.2 CD
153,000 CD
1,531,000 CD
15.31 CD
15\/32 CD
153.3 CD
1,534,600 CD
15.375 CD
153.93 CD
153.9 CD
1.53 CD
15.3 CD
153 CD
154.05 CD
154,240,000 CD
154.2 CD
15.43 CD
154.3 CD
15.44 CD
1.5463 CD
15,472 CD
1.54 CD
15.4 CD
154 CD
155,000 CD
1.5500 CD
155.039 CD
1,550 CD
15.50 CD
155.15 CD
155.1 CD
1.5523 CD
155.3 CD
155.4 CD
155,650,000 CD
155.6 CD
155.76 CD
155.7 CD
1.55 CD
15.5 CD
155 CD
155-mm CD
155-MM CD
155MM CD
156,000 CD
156,000-SQUARE-YARD JJ
156.12 CD
15.625 CD
156.3 CD
15.64 CD
15.65 CD
156.6 CD
156.7 CD
156.82 CD
156.83 CD
156.8 CD
1.56 CD
15.6 CD
156 CD
1,570 CD
157.1 CD
15.72 CD
157.2 CD
157.4 CD
1.5753 CD
1.5755 CD
15.75 CD
1.5765 CD
1.5775 CD
157.78 CD
157.8 CD
1.5795 CD
1.57 CD
15.7 CD
157 CD
1.5805 CD
15.80 CD
1.5820 CD
1.5825 CD
15.82 CD
158.2 CD
1.5840 CD
15,845,000 CD
15.85 CD
158,666 CD
15.87 CD
1.5885 CD
158,863 CD
1.5890 CD
1.58 CD
15.8 CD
158 CD
1.5920 CD
15.92 CD
1.5930 CD
1.5940 CD
15.97 CD
159.7 CD
1.5990 CD
159.92 CD
1.59 CD
15.9 CD
159 CD
15-ACRE JJ
15-A-SHARE JJ
1.5 CD
15 CD VBN
15-CENTIMETER-TALL JJ
15-CENTS-A-SHARE JJ
15-DAY JJ
15-FOLD JJ
1.5-mile CD
1.5-MILE CD
15-MINUTE JJ
15-MONTH JJ
15-POUND JJ
15-SECOND JJ
15TH-CENTURY JJ
15th JJ
15TH JJ
15-TRADER JJ
15-YEAR JJ
160,000 CD
16,000 CD
1,600 CD
1601.5 CD
160.1 CD
16.02 CD
1.6030 CD
16.03 CD
160.4 CD
160,510 CD
1.6055 CD
16.05 CD
16,072 CD
16.08 CD
16.09 CD
1.60 CD
160 CD
160-PAGE JJ
161.080 CD
1610 CD
161.1 CD
16.125 CD
161.3 CD
1.6143 CD
1.6145 CD
1614 CD
161.5 CD
1,616,000 CD
16.18 CD
161.8 CD
1.61 CD
16.1 CD
161 CD
161-DAY JJ
162,000 CD
1,620 CD
16.20 CD
162,190 CD
162.1 CD
16.22 CD
162.3 CD
16,250 CD
1.625 CD
16.25 CD
162,767 CD
1.62 CD
16.2 CD
162 CD
163,000 CD
16\/32 CD
163.2 CD
163.3 CD
16.375 CD
1.637 CD
1637 CD
16.38 CD
1.63 CD
16.3 CD
163 CD
163-MEMBER JJ
1,640,000 CD
1,640 CD
16.40 CD
1,642 CD
16.436 CD
164.78-POINT JJ
1,647 CD
164,830,000 CD
16,489 CD
1.64 CD
16.4 CD
164 CD
165,000 CD
16,500 CD
16.50 CD
165.1 CD
1,656,870 CD
16.56 CD
1657.61 CD
1,657,736 CD
16.59 CD
1.65 CD
16.5 CD
165 CD
165-MEMBER JJ
16.625 CD
166.4 CD
166,537 CD
16.66 CD
1666 CD
16.68 CD
166.8 CD
166,900,000 CD
166.9 CD
1.66 CD
16.6 CD
166 CD
16,746 CD
16.75 CD
167.7 CD
1678.5 CD
167.9 CD
1.67 CD
16.7 CD
167 CD
16,800,000 CD
1,680 CD
168.1 CD
168.50 CD
1,685 CD
168.7 CD
16.88 CD
1.68 CD
16.8 CD
168 CD
169.28 CD
169.4 CD
1,695,000 CD
16.95 CD
16.97 CD
169.9 CD
1.69 CD
16.9 CD
169 CD
16-BIT JJ
1.6 CD
16 CD
16-HOUR JJ
16-INCH JJ
1.6-LITER JJ
16-MONTH JJ
16-NATION JJ
16%-OWNED JJ
16-STORY JJ
16TH-CENTURY JJ
16th JJ
16TH JJ
16-YEAR-OLD JJ
16-year-olds NNS
16-YEAR-OLDS NNS
170,000 CD
17,000 CD
1,700 CD
1701.7 CD
17.01 CD
170,262 CD
170,330,000 CD
170.3 CD
170.4 CD
170.65 CD
17.06 CD
170.6 CD
170.75 CD
1.70 CD
170 CD
1.70-to-1.90 CD
1.70-TO-1.90 CD
171.04 CD
17.12 CD
171.4 CD
1,716 CD
17.19 CD
171.9 CD
1.71 CD
17.1 CD
171 CD
1720.5 CD
17.20 CD
1721.4 CD
172.2 CD
17.25 CD
172.5 CD
1.72 CD
17.2 CD
172 CD
1730.7 CD
1,730 CD
173.1 CD
17\/32 CD
173.3 CD
1,735 CD
173.5 CD
17.375 CD
17.37 CD
1738.1 CD
1738.7 CD
1739.3 CD
17.39 CD
1.73 CD
17.3 CD
1744 CD
1,745,000 CD
174.5 CD
17.47 CD
174.8 CD
1,749,000 CD
1.74 CD
17.4 CD
174 CD
1,750,000 CD
175,000 CD
17,500 CD
1,750 CD
17.50 CD
1751.9 CD
175,240,000 CD
175.2 CD
1,754,000 CD
175.4 CD
175.5 CD
1758.5 CD
1.75 CD
17.5 CD
175 CD
1.7600 CD
176,100,000 CD
1761.0 CD
176.1 CD
176,470 CD
17.64 CD
176.4 CD
176.7 CD
17,699 CD
1.76 CD
17.6 CD
176 CD
176-ITEM JJ
1,770 CD
17.70 CD
1772.1 CD
1772.6 CD
17.73 CD
177.3 CD
1,774,326 CD
177.4 CD
177.5 CD
1.77 CD
17.7 CD
177 CD
178.0 CD
178.375 CD
1,784,400 CD
178.5 CD
178.61 CD
1787 CD
178.8 CD
178.9 CD
1.78 CD
17.8 CD
178 CD
179,032 CD
17.92 CD
17.95 CD
1796 CD
17.97 CD
179.916 CD
1.79 CD
17.9 CD
179 CD
1.7 CD
17 CD
17-CITY JJ
17-MEMBER JJ
17-NATION JJ
17-STORE JJ
17TH-CENTURY JJ
17th JJ
17TH JJ
17-YEAR-OLD JJ
180,000 CD
18,000 CD
1-800-453-9000 CD
1,800-A-YEAR JJ
1,800 CD
1,802,000 CD
180.3 CD
1805-91 CD
180.60 CD
180.7 CD
1807 CD
1,809,300 CD
180.9 CD
1.80 CD
180 CD
180-FOOT-TALL JJ
1,810,700 CD
18.11 CD
18.125 CD
18,136 CD
1,816,000 CD
1817.7 CD
1818 CD
181.9 CD
1.81 CD
18.1 CD
181 CD
1.8200 CD
182.1 CD
1,826,596 CD
182.6 CD
1,828,000 CD
182.9 CD
1.82 CD
18.2 CD
182 CD
182-DAY JJ
1.8300 CD
1830-1930 CD
1.8305 CD
1830 CD
18.32 CD
18\/32 CD
1.8340 CD
183,467 CD
1.8353 CD
1.8355 CD
18.35 CD
18.375 CD
1,837,800 CD
1,838,200 CD
1,839,600 CD
1.83 CD
18.3 CD
183 CD
1.8400 CD
1.8410 CD
1.8415 CD
1,843,000 CD
1.8435 CD
18.443 CD
18,444 CD
184.4 CD
1844 CD
1845 CD
18.46 CD
1.8470 CD
184.74 CD
1,848,000 CD
1.8480 CD
1.8485 CD
18.49 CD
184.9 CD
1.84 CD
18.4 CD
184 CD
184-DAY JJ
1.8500 CD
1,850 CD
18.50 CD
1850 CD
1850s NNS
1850S NNS
185.1 CD
1.8535 CD
1,853,735 CD
185.59 CD
185.5 CD
1.8560 CD
1.8578 CD
185.7 CD
1,859 CD
185.9 CD
185-ACRE JJ
1.85 CD
18.5 CD
185 CD
186,000 CD
186.1 CD
18.625 CD
186.4 CD
1.8650-1.8850 CD
1.8655 CD
18.65 CD
1.8665 CD
1.8667 CD
1.8685 CD
18.68 CD
1868 CD
1.8690 CD
18.69 CD
1.86 CD
18.6 CD
186 CD
187.1 CD
1.8720 CD
1872 CD
1.8735 CD
18.73 CD
1,874,000 CD
1.8740 CD
187.4 CD
1.875 CD
18.75 CD
187.8 CD
1878 CD
1,878-PAGE JJ
1.87 CD
18.7 CD
187 CD
1.87-MARK JJ
1,880 CD
18.819 CD
188.1 CD
1881 CD
188.2 CD
1883 CD
188.5 CD
188,726 CD
18.875 CD
188.7 CD
188.84 CD
188.89 CD
1.8895 CD
1.88 CD
18.8 CD
188 CD
1890 CD
1890s CD NNS
1890S NNS CD
1891 CD
1,892 CD
1892 CD
189.32 CD
189.52 CD
18.95 CD
1897 CD
18.98 CD
189.8 CD
1.89 CD
18.9 CD
189 CD
18-A-SHARE JJ
1.8 CD
1\/8 CD
18 CD
18-HOLE JJ
18-MONTH-OLD JJ
18-SCREEN JJ
18-STORY JJ
18TH-CENTURY JJ
18th JJ
18TH JJ
18-TO-$19 JJ
18-YEAR-OLD JJ
18-year-olds NNS
18-YEAR-OLDS NNS
190,000 CD
1.9000 CD
19,000 CD
1,900 CD
1900 CD
1900s NNS CD
1900S NNS CD
190.125 CD
190.1 CD
1901 CD
190.3 CD
1903 CD
190.4 CD
1904 CD
190.58 CD
190.58-POINT JJ
1905 CD
1906 CD
1.9083 CD
1,908 CD
1908 CD
1909 CD
1.90 CD
190 CD
190-point JJ NN
190-POINT JJ NN
1910 CD
191.1 CD
1911 CD
19.125 CD
191.2 CD
191.3 CD
1.9140 CD
191.4 CD
1914 CD
1915-1923 CD
1.9166 CD
1.916 CD
191.75 CD
1917 CD
191.9 CD
1.91 CD
19.1 CD
191 CD
1,920 CD
1920s CD NNS NN
1920S CD NNS NN
192.12 CD
192.1 CD
1923 CD
1924 CD
19.25 CD
192.5 CD
1925 CD
1926 CD
1927 CD
1928-33 CD
192.9 CD
1929 CD
1.92 CD
19.2 CD
192 CD
1,930 CD
19.30 CD
1930 CD
1930s NNS CD
1930S NNS CD
19\/32 CD
1932 CD
193.3 CD
1933 CD
1934 CD
1935 CD
1936 CD
1937-40 CD
1.9375 CD
1937-87 CD
1937 CD
19.38 CD
1938 CD
19,395 CD
1939 CD
1.93 CD
19.3 CD
193 CD
194,000 CD
1940-1987 CD
1,940 CD
1940s NNS CD
1940S NNS CD
1941 CD
194.24 CD
1942 CD
1943 CD
194.50 CD
1945 CD
194.69 CD
1947 CD
1948-89 CD
1948 CD
1949 CD
1.94 CD
19.4 CD
194 CD
19.50 CD
1950 CD
1950s CD NNS
1950S CD NNS
195.19 CD
19.51 CD
1951 CD
1952 CD
1953 CD
195.4 CD
1954 CD
1955 CD
1956 CD
1957 CD
1958 CD
1959 CD
1.95 CD
19.5 CD
195 CD
19.60 CD
1960 CD
1960s NNS CD
1960S NNS CD
196.1 CD
1961 CD
19.625 CD
1962-63 CD
1962-85 CD
19.62 CD
196.2 CD
1962 CD
1963 CD
1964 CD
19.65 CD
1965 CD
1966 CD
1967-68 CD
196,785 CD
196.7 CD
1967 CD
196.8 CD
1968 CD
1969-72 CD
19.69 CD
1969 CD
1.96 CD
19.6 CD
196 CD
1970-85 CD
1970 CD
1970s NNS CD
1970S NNS CD
1971-1974 CD
1971 CD
19.72 CD
1972 CD
1973-75 CD
1973 CD
1974-75 CD
1974-81 CD
1974 CD
1975-80 CD
19.75 CD
1975 CD
19.76 CD
1976 CD
1,977 CD
1977 CD
1978 CD
1,979,000 CD
1979-80 CD
1979 CD
1.97 CD
19.7 CD
197 CD
1,980 CD
1980 CD
1980s CD NNS NN
1980S CD NNS NN
198,120,000 CD
198.1 CD
1981 CD
1982-1984 CD
1982-83 CD
1982-84 CD
1982 CD
1983-1987 CD
1983-85 CD
1983 CD
1984-1989 CD
198.41 CD
1984-85 CD
1984 CD
1985-86 CD
1985 CD
1986-87 CD
1986 CD
1987-88 CD
1987 CD
1987-STYLE JJ
1988-89 CD
1988 CD
1988-MODEL JJ
1988-RETURN JJ
1989-1990 CD
1989-1 NNP
1989-3 CD
1989-82 CD
1989-83 CD
1989-84 CD
1989-85 CD
1989-86 CD
1989-87 CD
1989-88 CD
1989-89 CD
1989-90 CD
1989-A NNP
1989A NNP
1989B NNP
1989 CD NNP
1989-MODEL JJ
1.98 CD
19.8 CD
198 CD
1990-1995 CD
1990-2000 CD
1990-2002 CD
1990-2004 CD
1990-2009 CD
1990-91 CD
1990-94 CD
1990A NNP
1990 CD
1990-model JJ NN
1990-MODEL JJ NN
1990s CD NNS
1990S CD NNS
1991-1996 CD
1991-1999 CD
1991-2000 CD
19912000 CD
1991 CD
199,203 CD
1992-1999 CD
1992-2000 CD
1992 CD
19931999 CD
1993-2009 CD
19.93 CD
1993 CD
19.94 CD
1994 CD
1995-1999 CD
19.95 CD
1995 CD
1996-2000 CD
199.6 CD
1996 CD
1997-2000 CD
199.7 CD
1997 CD
1998-2011 CD
19.98 CD
199.8 CD
1998 CD
1999 CD
1.99 CD
19.9 CD
199 CD
19-BUILDING JJ
1.9 CD
19 CD
19-DAY JJ
19-INCH JJ
19-MEMBER JJ
19-MONTH JJ
19-MONTH-OLD JJ
19-Nov NNP
19-NOV NNP
19%-OWNED JJ
19-STORY JJ
19th-century JJ NN
19TH-CENTURY JJ NN
19th JJ
19TH JJ
19-TO-$21 JJ
19-YEAR JJ
19-year-olds NNS
19-YEAR-OLDS NNS
1%-A-YEAR JJ
1. CD
1 CD LS
1-Dec NNP
1-DEC NNP
1-FOR-10 JJ
1-for-17 NN
1-FOR-17 NN
1-MILLION-PLUS JJ
1ST CD
1-TO-1 JJ
200,000 CD
200,000-SHARE JJ
20,000 CD
20,000-GALLON JJ
2,000 CD
2000 CD
2001-2005 CD
2001 CD
2,002 CD
200.2 CD
2002 CD
200-300 CD
2003-2005 CD
2003\/2007 CD
2003-2008 CD
200.3 CD
2003 CD
2004 CD
200.5 CD
2005 CD
200.6 CD
2006 CD
200.70 CD
2.007 CD
20.07 CD
2007 CD
2008-2009 CD
2008 CD
2009-2011 CD
2009 CD
2.00 CD
200 CD
200-lawyer NN
200-LAWYER NN
200-PERSON JJ
200-POINT JJ
200-RUBLE JJ
200th JJ
200TH JJ
201,028 CD
2,010 CD
2010 CD
2011 CD
20.125 CD
201.2 CD
2012 CD
2013 CD
2014 CD
2015 CD
2.016 CD
2016 CD
201.7 CD
2017 CD
201,870 CD
2018 CD
2019 CD
2.01 CD
20.20 CD
2020 CD
2,022 CD
2023 CD
20.24 CD
2.025 CD
20.25 CD
2027 CD
2029.7 CD
2029 CD
2.02 CD
20.2 CD
20\/32 CD
203.2 CD
203.56 CD
203.5 CD
20.375 CD
20.38 CD
20.39 CD
2.03 CD
20.3 CD
203 CD
20.42 CD
204.2 CD
204.3 CD
204.5 CD
2,046 CD
2,048 CD
20.48 CD
204.8 CD
2.04 CD
20.4 CD
204 CD
204-LAWYER JJ
204s NNS
204S NNS
2,050 CD
20.50 CD
2,050-PASSENGER JJ
2,052.10 CD
205.3 CD
20.56 CD
2,057,750,000 CD
20.59 CD
2.05 CD
20.5 CD
205 CD
2,060 CD
206-199 JJ
20.625 CD
206.3 CD
2,064 CD
206.87 CD
2.06 CD
20.6 CD
206 CD
207,000 CD
2,070 CD
20.71 CD
207.4 CD
20.75 CD
2076.8 CD
2:07 CD
2.07 CD
20.7 CD
207 CD
2,080 CD
2082.1 CD
20.83 CD
20.85 CD
20.875 CD
208.7 CD
208.8 CD
20.89 CD
2.08 CD
20.8 CD
208 CD
209,000 CD
2093 CD
20.988.12 CD
2,099 CD
2.09 CD
20.9 CD
20-A-SHARE JJ
20%-A-YEAR JJ
20-BOND JJ
2-0 CD
2.0 CD
20. CD
20 CD NNP
20-CITY JJ
20-CLASS JJ
20-DAY JJ
20Dec NNP
20DEC NNP
20-HOUR JJ
20-MEGABYTE JJ
20-MILE JJ
20-MINUTE JJ
20%-OWNED JJ
20-PAGE JJ
20%-PLUS JJ
20-POINT JJ
20s CD NNS
20S NNS CD
20-STOCK JJ
20-stocks NNS
20-STOCKS NNS
20-STORY JJ
20TH-CENTURY JJ
20th JJ
20TH JJ
20-TO-30-MILE JJ
20-WEEK JJ
20-YEAR JJ
20-YEAR-OLD JJ
210,000 CD
21,000 CD
2,100 CD
2100 CD
2102.2 CD
210.2 CD
21.03 CD
210.3 CD
210.8 CD
2.10 CD
210 CD
2112.2 CD
21.125 CD
211,666 CD
211.6 CD
2117.1 CD
21.18 CD
211.96 CD
2.11 CD
21.1 CD
211 CD
2120.5 CD
2,120 CD
212.1 CD
21.23 CD
21.25-A-SHARE JJ
2.125 CD
21.25 CD
212.5 CD
2129.4 CD
2.12 CD
21.2 CD
212 CD
213,000 CD
21\/32 CD
213.2 CD
21.33 CD
2135.5 CD
213.97 CD
21.3 CD
213 CD
214,000 CD
2141.7 CD
2142.6 CD
21.42 CD
21.44 CD
214.4 CD
214.54 CD
214.73 CD
2149.3 CD
2.14 CD
21.4 CD
214 CD
215.04 CD
21.50 CD
215.35 CD
215.3 CD
215.42 CD
215.48 CD
2,156,000 CD
215.67 CD
2,157,656 CD
215,845 CD
215.86 CD
215-898-6791 CD
2.15 CD
21.5 CD
215 CD
2.15-PER-UNIT JJ
2160.1 CD
2161.9 CD
21.625 CD
2163.2 CD
2163.4 CD
216.49 CD
216.74 CD
21,687 CD
216.8 CD
2.16 CD
21.6 CD
216 CD
217,000 CD
2170.1 CD
2170 CD
21.71 CD
21.72 CD
2.175 CD
217.5 CD
2176.9 CD
2179.1 CD
217.9 CD
2.17 CD
21.7 CD
217 CD
21.875 CD
21.88 CD
2189.3 CD
2189.7 CD
2189 CD
2.18 CD
21.8 CD
218 CD
219.19 CD
219.27 CD
21.98 CD
2.19 CD
21-9 CD
21.9 CD
219 CD
21-A-SHARE JJ
2-1 CD
2.1 CD
21 CD
21-June NNP
21-JUNE NNP
21-MEMBER JJ
21-MONTH JJ
21-SQUARE-MILE JJ
21st JJ CD
21ST JJ CD
21-YARD JJ
21-YEAR JJ
21-YEAR-OLD JJ
220,000 CD
22,000 CD
2,200 CD
2200 CD
2,202,000 CD
2,204,000 CD
220.45 CD
2,204.62 CD
2,205,000 CD
2.20 CD
220 CD
2210 CD
22.125 CD
221.4 CD
221.61 CD
2.21 CD
22:1 CD
22.1 CD
221 CD
221-PERSON JJ
222,000 CD
222.15 CD
222.3 CD
22.25 CD
22.26 CD
222.875 CD
222.8 CD
2.22 CD
22.2 CD
222 CD
22,300 CD
2,230 CD
223.0 CD
223-178 JJ
22\/32 CD
223.2 CD
22,336 CD
2233.9 CD
223.3 CD
223.4 CD
2237.8 CD
223.7 CD
2-23 CD
2.23 CD
22.3 CD
223 CD
224,070,000 CD
224.1 CD
224.5 CD
224.75 CD
22.4 CD
224 CD
2,250,000 CD
225,000 CD
22.50 CD
225.5 CD
225.6 CD
225.7 CD
2:25 CD
2.25 CD
22.5 CD
225 CD
22.61 CD
226.3 CD
226,570,380 CD
226.5 CD
2.26 CD
22.6 CD
226 CD
2,270 CD
22.70 CD
227.1 CD
227.3 CD
22,750,000 CD
22.75 CD
22.76 CD
22.78 CD
2.27 CD
227 CD
228,000 CD
22.82 CD
2.28 CD
22.8 CD
228 CD
229.03 CD
2,290 CD
22,925 CD
22,985,000 CD
2.29 CD
22.9 CD
229 CD
22-ACRE JJ
2.2 CD
22 CD
22-FOOT JJ
22-MONTH-OLD JJ
22nd JJ CD
22ND JJ CD
22-RATED JJ
22-YEAR-OLD JJ
230,000 CD
23,000 CD
2,300 CD
23.00 CD
230-215 CD
23.031 CD
2,303,328 CD
23,059 CD
230.5 CD
230.8 CD
230-A-SHARE JJ
2:30 CD
2.30 CD
23.0 CD
230 CD
230-PERSON JJ
231,000 CD
231-191 JJ CD
23.11 CD
2.3125 CD
23.125 CD
231,405 CD
23.1 CD
231 CD
23.20 CD
232.12 CD
232.3 CD
232.4 CD
23.25 CD
232.6 CD
232.8 CD
2.32 CD
2\/32 CD
23.2 CD
232 CD
233,000 CD
2,331,100 CD
23.31 CD
23\/32 CD
23.34 CD
233.6 CD
2.33 CD
23.3 CD
233 CD
23,403 CD
234.3 CD
234.4 CD
234.5 CD
2.34 CD
23.4 CD
234 CD
235,000 CD
23.500 CD
23.50 CD
235.2 CD
23.53 CD
235.5 CD
23.57 CD
2.35 CD
23-5 CD
23.5 CD
235 CD
236.09 CD
2,360 CD
236.23 CD
23,625 CD
23.625 CD
23.65 CD
236-6510 CD
236.74 CD
236.79 CD
236.8 CD
2.36 CD
23.6 CD
236 CD
237.1 CD
23.72 CD
2.375 CD
237.8 CD
237,960,000 CD
2,379 CD
23.7 CD
237 CD
237-SEAT JJ
238,000-CIRCULATION JJ
238.3 CD
2,387,226 CD
2.38 CD
23.8 CD
238 CD
2.39 CD
23.9 CD
239 CD
.23 CD
2-3 CD
2.3 CD
2\/3 CD
23 CD
23-DAY JJ
2%-3 JJ
23-MONTH-OLD JJ
240,000 CD
24,000 CD
2,400 CD
2400 CD
24.05 CD
240.86 CD
240.8 CD
240-A-SHARE JJ
2.40 CD
240 CD
240-PAGE JJ
240SX NNP
2,410 CD
2410 CD
2,412 CD
241.6 CD
241.7 CD
241.9 CD
2.41 CD
24.1 CD
241 CD
2.41-to-1 CD
2.41-TO-1 CD
24.213 CD
2.4225 CD
2423.9 CD
2,425,000 CD
24.25 CD
242.8 CD
2.42 CD
24.2 CD
242 CD
24\/32 CD
243.2 CD
243.4 CD
243,677 CD
2.4375 CD
2:43 CD
2.43 CD
24.3 CD
243 CD
244,000 CD
24,405 CD
2,440 CD
244.2 CD
2445 CD
244.6 CD
244.8 CD
2.44 CD
24.4 CD
244 CD
24.50 CD
2450 CD
245.3 CD
2:45 CD
2.45 CD
24.5 CD
245 CD
246.60 CD
246.6 CD
24.68 CD
246.9 CD
2.46 CD
24.6 CD
246 CD
247,000 CD
2,470 CD
2,472 CD
247.3 CD
247.6 CD
2.47 CD
24.7 CD
247 CD
2,480 CD
248,279 CD
248.2 CD
248.3 CD
24.875 CD
24,891 CD
248.91 CD
2.48 CD
24.8 CD
248 CD
2,490 CD
249-166 JJ
24.95 CD
249.5 CD
249.68 CD
24,985,000 CD
24,999 CD
2.49 CD
24.9 CD
24-A-SHARE JJ
2-4 CD
2.4 CD
24 CD
24. CD
24-Dec NNP
24-DEC NNP
24-HOUR JJ
24-MONTH JJ
24th JJ
24TH JJ
24TH-LARGEST JJ
24-YEAR JJ
250,000 CD
250,000-SQUARE-FOOT JJ
25,000 CD
25,000-MEMBER JJ
2,500 CD
2500 CD
2,500-PER-JOB JJ
2,500-PERSON JJ
250-170 JJ
250.17 CD
25.01 CD
250.2 CD
250.80 CD
2,508 CD
250-BRANCH JJ
2.50 CD
250 CD
250-MEGAWATT JJ
250-POINT JJ
251,170,000 CD
25.125 CD
25.12 CD
251.2 CD
251.8 CD
2.51 CD
25.1 CD
251 CD
2,520 CD
25.25 CD
252.5 CD
2.52 CD
25.2 CD
252 CD
25\/32 CD
2.53 CD
25.3 CD
253 CD
254,200 CD
254,280 CD
2:54 CD
2.54 CD
25.4 CD
254 CD
25.50 CD
25.51 CD
255.8 CD
255,923 CD
2.55 CD
25.5 CD
255 CD
256,000 CD
256.18 CD
256.6 CD
2569.26 CD
2.56 CD
25.6 CD
256 CD
257.5 CD
25.78 CD
257.8 CD
2.57 CD
25.7 CD
257 CD
258,000 CD
258.4 CD
25.875 CD
258.9 CD
2.58 CD
25.8 CD
258 CD
2596.72 CD
25.96 CD
2.59 CD
25-A-SHARE JJ
2-5 CD
2.5 CD
25 CD
25-CENT-A-SHARE JJ
2.5-MILE JJ
25-MILLION-SHARE JJ
25-POINT JJ
25th JJ
25TH JJ
2.5-TON JJ
25-YEAR-OLD JJ
2,600,000 CD
260,000 CD
26,000 CD
2600.88 CD
2,600 CD
2600 CD
2601.70 CD
26.02 CD
2603.48 CD
260.5 CD
2.60 CD
260 CD
2,610 CD
2611.68 CD
26.125 CD
2613.73 CD
261.3 CD
2.616 CD
2618.03 CD
2.61 CD
26.1 CD
261 CD
2623.60 CD
26.23 CD
262.4 CD
2.625 CD
26.29 CD
2.62 CD
26.2 CD
263.07 CD
26\/32 CD
263.2 CD
2,633,700 CD
26,350 CD
263,684 CD
2638.73 CD
2.63 CD
26.3 CD
2640 CD
2642.64 CD
2642.88 CD
2643.65 CD
2645.08 CD
2645.90 CD
264.6 CD
26.48 CD
264 CD
265,000-SQUARE-FOOT JJ
26.50 CD
2653.28 CD
26.54 CD
2657.38 CD
265.79 CD
2659.22 CD
2.65 CD
26.5 CD
265 CD
2,660 CD
2662.91 CD
266.2 CD
2,664,098 CD
2665.66 CD
266.5 CD
266.66 CD
26.68 CD
2.66 CD
26.6 CD
266 CD
2676.60 CD
2679.72 CD
26.7 CD
267 CD
26-7 JJ
26.805 CD
2,680 CD
2680 CD
2681.22 CD
2681.76 CD
26.81 CD
2683.20 CD
268.3 CD
268.6 CD
2687.53 CD
26.875 CD
2689.14 CD
268.98 CD
2.68 CD
26.8 CD
268 CD
2691.19 CD
2692.65 CD
269.3 CD
26,956 CD
2697.58 CD
2.69 CD
26.9 CD
269 CD
2.6 CD
26 CD
26-MAN JJ
26-POINT JJ
26-ROOM JJ
26TH JJ NNP
26th NNP JJ
26-WEEK JJ
26-YEAR-OLD JJ
27,000 CD
2,700 CD
.270 CD
2.70 CD
270 CD
2,710 CD
271,124 CD
271-147 CD
27.125 CD
2.71 CD
27.1 CD
271 CD
272,000 CD
2,720,675 CD
27,225 CD
27.2 CD
272 CD
273,000 CD
273-121 JJ
27\/32 CD
2,735 CD
273.5 CD
2736 CD
273.9 CD
2.73 CD
273 CD
274.2 CD
274,475 CD
274,963 CD
2.74 CD
27.4 CD
274 CD
275,000 CD
27,500 CD
27.50-A-SHARE JJ
2,750 CD
27.50 CD
275-A-SHARE JJ
2.75 CD
27.5 CD
275 CD
2,760 CD
276,334 CD
27.68 CD
276.8 CD
2.76 CD
27.6 CD
27.75 CD
2.77 CD
27.7 CD
277 CD
2782.30 CD
278.4 CD
27.875 CD
278.7 CD
2.78 CD
27.8 CD
278 CD
27.90 CD
279.0 CD
2791.41 CD
279.1 CD
279.39 CD
27.95 CD
279.75 CD
27.97 CD
279.8 CD
2.79 CD
27.9 CD
279 CD
2.79-to-1 CD
2.79-TO-1 CD
27-A-SHARE JJ
2.7 CD
27 CD
27-March NNP
27-MARCH NNP
27-POINT JJ
27th JJ
27TH JJ
27-WEEK JJ
27-YEAR JJ
27-YEAR-OLD JJ
280,000 CD
28,000 CD
2,800 CD
2,800-YEAR-OLD JJ
280.5 CD
280.7 CD
2,809 CD
2.80 CD
280 CD
28.125 CD
281.2 CD
28.15 CD
2.81 CD
28.1 CD
281 CD
282.08 CD
2,820 CD
2,822,000 CD
28.25 CD
2.82 CD
28.2 CD
282 CD
2,830 CD
283-132 JJ
28\/32 CD
283.2 CD
283.3 CD
28.36 CD
28.375 CD
283.7 CD
283.8 CD
283.9 CD
2.83 CD
28.3 CD
283 CD
2,840 CD
28.43 CD
28.461 CD
28.4 CD
284 CD
2,850,000 CD
2,853,000 CD
2.853 CD
28.53 CD
28.55 CD
2.85 CD
28.5 CD
285 CD
28.625 CD
286.6 CD
286.8 CD
2.86 CD
28.6 CD
286 CD
287-123 JJ
287,209 CD
2.875 CD
28.75 CD
2.87 CD
28.7 CD
287 CD
288,000 CD
2,888,000 CD
2,888 CD
2.8896 CD
288.9 CD
2.88 CD
28.8 CD
288 CD
2,890 CD
2890 CD
2.8956 CD
289.7 CD
2.89 CD
289 CD
2-8 CD
2.8 CD
28 CD
28-OUNCE JJ
28%-OWNED JJ
28-PENCE JJ
28-QUESTION JJ
28-STORY JJ
28th JJ
28TH JJ
29,000 CD
290.1 CD
290,541 CD
290,782 CD
2.90 CD
290 CD
2.90-MARK JJ
291.6 CD
291,890 CD
2.91 CD
29.1 CD
291 CD
291-PAGE JJ
292.32 CD
29.25 CD
292 CD
293.29 CD
29\/32 CD
2,936 CD
293.7 CD
293.9 CD
29.3 CD
293 CD
29,400 CD
2,940 CD
2.9428 CD
2.9429 CD
294.6 CD
2.9495 CD
2.94 CD
29.4 CD
294 CD
2.9511 CD
295.7 CD
29.583 CD
2.95 CD
29.5 CD
295 CD
2,960 CD
296,187 CD
2.9622 CD
29.62 CD
29.66 CD
296.6 CD
296.95 CD
29.6 CD
29,700 CD
297.1 CD
297,446 CD
29.75 CD
2.97 CD
29.7 CD
297 CD
2,980 CD
29.8 CD
298 CD
299,000 CD
29.90 CD
29.9 CD
299 CD
2.9 CD
29 CD
29-INCH JJ
29year JJ
29YEAR JJ
29-YEAR-OLD JJ
2-A-MINUTE JJ
2 CD LS ,
2-FOR-1 JJ
2-TO-1 JJ
300,000 CD
30,000 CD
3,000 CD
3000 CD
300-113 CD
300.1 CD
30.09 CD
300-A-SHARE JJ
3.00 CD
300 CD
300-day JJ CD
300-DAY JJ CD
300-MEGAWATT JJ
300-YEAR-OLD JJ
300ZX NNP
30,180 CD
301.9 CD
3.01 CD
30.1 CD
301 CD NNP
301-YEAR-OLD JJ
302,000 CD
30.25 CD
3,027,330 CD
3.02 CD
30.2 CD
303-107 JJ
30\/32 CD
303.7 CD
303.9 CD
3.03 CD
30.3 CD
303 CD
3,040,000 CD
30.41 CD
3.04 CD
30.4 CD
304 CD
30,537 CD
305.7 CD
3057 CD
3.05 CD
30.5 CD
305 CD
306,000 CD
306.6 CD
3.06 CD
30.6 CD
306 CD
307,000 CD
307.2 CD
30.75 CD
307.9 CD
3:07 CD
3.07 CD
30.7 CD
307 CD
308.32 CD
30,841 CD
30.84 CD
30.88 CD
3.08 CD
308 CD
3090 CD
3090s NNS
3090S NNS
309,381 CD
309.3 CD
309,500 CD
30.96 CD
3.09 CD
30.9 CD
309 CD
30-ACRE JJ
30-A-SHARE JJ
3-0 CD
3.0 CD
30 CD
30-day JJ CD
30-DAY JJ CD
30-FOOT JJ
30-MINUTE JJ
30-Nov. NNP
30-NOV. NNP
30-Oct NNP
30-OCT NNP
30-ODD JJ
30%-OWNED JJ
30-POINT JJ
30-POUND JJ
'30s CD NNS
30s CD NNS
30-SECOND JJ
30-share JJ CD
30-SHARE JJ CD
'30S NNS CD
30S NNS CD
30-STOCK JJ
30th JJ
30TH JJ
30-year JJ CD
30-YEAR JJ CD
30-YEAR-OLD JJ
31,000 CD
3,102,935 CD
31.05 CD
310.9 CD
3.10 CD
310 CD
3,111,000 CD
31.125 CD
31,143 CD
311.6 CD
31.18 CD
311.8 CD
3.11 CD
31.1 CD
31.22 CD
3.125 CD
31.25 CD
3.12 CD
31.2 CD
312 CD
313,125 CD
31,329 CD
31\/32 CD
313.2 CD
31.375 CD
313,800 CD
3.13 CD
31.3 CD
313 CD
314,000 CD
314.09 CD
314.6 CD
31.48 CD
314-968-3770 CD
3.14 CD
31.4 CD
314 CD
315,000 CD
31.50 CD
315.12 CD
315.2 CD
315,546 CD
31.55 CD
315.5 CD
315.8 CD
3:15 CD
3.15 CD
31.5 CD
315 CD
316,400 CD
31.65 CD
3.16 CD
3\/16 CD
31.6 CD
316 CD
317.3 CD
3,175 CD
31.75 CD
31,777 CD
317.7 CD
3.17 CD
31.7 CD
317 CD
318.6 CD
31.875 CD
318.79 CD
318.7 CD
3.18 CD
31.8 CD
318 CD
319,000 CD
319.75 CD
3.19 CD
31.9 CD
319 CD
3.1 CD
31 CD
31. CD
3-1 CD JJ
31-CENT JJ
3-1 JJ CD
31-YEAR-OLD JJ
320,000 CD
32,000 CD
3,200 CD
3200 CD
320-200 CD
320.4 CD
320.54 CD
320.5 CD
320.94 CD
320.97 CD
3.20 CD
320 CD
321,000 CD
32.125 CD
321.5 CD
32,191 CD
321-99 CD
3.21 CD
321 CD
322.7 CD
3.22 CD
32.2 CD
322 CD
323,000 CD
323.2 CD
323.4 CD
323.85 CD
3.23 CD
32.3 CD
323 CD
323s NNS
323S NNS
324.75 CD
324.9 CD
32.4 CD
324 CD
3,250,000 CD
325,000 CD
32.50 CD
3.253 CD
325.50 CD
325-92 JJ
3:25 CD
3.25 CD
32.5 CD
325 CD
326,000 CD
3.26 CD
32.6 CD
326 CD
32.71 CD
3.27 CD
32.7 CD
328,000 CD
32.82 CD
328.2 CD
3,288,453 CD
328.85 CD
3.28 CD
32.8 CD
329.2 CD
329,600 CD
32.99 CD
3.29 CD
32.9 CD
329 CD
3.2-ACRE JJ
32-ACRE JJ
32-A-SHARE JJ
32-BIT JJ
3.2 CD
32 CD
32-NATION JJ
32-STORY JJ
32-YEAR-OLD JJ
330,000 CD
33,000 CD
3,300 CD
330.1 CD
3:30 CD
3.30 CD
330 CD
331,000 CD
331,400 CD
331.8 CD
3.31 CD
33.1 CD
331 CD
332,000 CD
332.38 CD
33.25 CD
332.5 CD
33,270 CD
3\/32 CD
33.2 CD
333,000 CD
333.3 CD
333.65 CD
33.375 CD
3.33 CD
33.3 CD
333 CD
334,000 CD
334.5 CD
334,774 CD
334.8 CD
3.34 CD
335.07 CD
3,350 CD
335,700 CD
3.35 CD
335 CD
33.625 CD
3,363,949 CD
336.4 CD
336.5 CD
3.36 CD
33.6 CD
336 CD
3371.36 CD
3,372 CD
3.375 CD
33.75 CD
3377.43 CD
337 CD
3,383,477 CD
338-44 RB
33.875 CD
338.9 CD
3.38 CD
33.8 CD
338 CD
3,390 CD
33.90 CD
3392.49 CD
3393.51 CD
3398.65 CD
3.39 CD
33.9 CD
339 CD
3.3 CD
33 CD
33-POINT JJ
33-YEAR-OLD JJ
340,000 CD
34,000 CD
340.36 CD
3406.31 CD
340.7 CD
340.83 CD
340B NNP
3.40 CD
340 CD
341,000 CD
3411.08 CD
341.16 CD
341.20 CD
3416.81 CD
341.76 CD
3.41 CD
3,420,936 CD
342,122 CD
3421.29 CD
34,215,000 CD
342.50 CD
3425.22 CD
3425.60 CD
34.25 CD
3426.33 CD
3427.39 CD
3.42 CD
34.2 CD
342 CD
34,320 CD
343,333 CD
34.35 CD
3436.58 CD
34.375 CD
3,437 CD
3.43 CD
34.3 CD
343 CD
344,354 CD
34468.69 CD
3.44 CD
344 CD
34,500 CD
3,450 CD
345-47 CD
345.5 CD
3-4-5 CD
3:45 CD
3.45 CD
34.5 CD
345 CD
34,602 CD
34.625 CD
34633.63 CD
3.46 CD
34.6 CD
346 CD
347.13 CD
347.16 CD
34795.05 CD
347 CD
3,481,887 CD
348.2 CD
348.4 CD
3.48 CD
349-0126 CD
34903.80 CD
34941.01 CD
349,900 CD
34996.08 CD
349.9 CD
3.49 CD
34.9 CD
349 CD
34-A-SHARE JJ
3-4 CD
3.4 CD
3\/4 CD
34 CD
34-FLOOR JJ
34-FOOT-TALL JJ
34-PAGE JJ
34TH JJ NNP
34th NNP JJ
34-YEAR-OLD JJ
350,000 CD
350,000-SQUARE-FOOT JJ
35,000 CD
35000 CD
35,000-to-$50,000 CD
35,000-TO-$50,000 CD
3,500 CD
35015.38 CD
35087.38 CD
3.50 CD
350 CD
350-SEAT JJ
35107.56 CD
35116.02 CD
35.125 CD
351.2 CD
3,513,072 CD
35133.83 CD
351.3 CD
351.5 CD
3.51 CD
351 CD
35.23 CD
3,524,000 CD
35242.65 CD
35.25 CD
3.526 CD
352.7 CD
35.28 CD
352.9 CD
3.52 CD
35.2 CD
352 CD
352-MILE JJ
353,500 CD
35374.22 CD
35378.44 CD
35.38 CD
3.53 CD
353 CD
354,000 CD
35417.44 CD
35442.40 CD
35-44 CD
354.4 CD
35452.72 CD
354,600 CD
354.7 CD
35486.38 CD
3.54 CD
35.4 CD
354 CD
35500.64 CD
35.50 CD
35526.55 CD
35527.29 CD
35544.47 CD
35544.87 CD
35549.44 CD
35564.43 CD
35585.52 CD
35586.60 CD
35587.85 CD
35588.36 CD
3:55 CD
3.55 CD
35.5 CD
355 CD
35611.38 CD
356.1 CD
35670 CD
35678.49 CD
35689.98 CD
3.56 CD
35.6 CD
356 CD
35.6%-OWNED JJ
35714.85 CD
357.2 CD
357.49 CD
357.4 CD
35.75 CD
357.5 CD
3.57 CD
35.7 CD
357 CD
35.875 CD
358 CD
359,100 CD
3.59 CD
35.9 CD
359 CD
3.5 CD
35 CD
35-CENTS-A-GALLON JJ
35-HOUR JJ
3.5-INCH JJ
35-MEMBER JJ
35-MINUTE JJ
35MM CD
35-NATION JJ
35th JJ
35TH JJ
35-YEAR-OLD JJ
360,000 CD
36,000 CD
3,600 CD
36,015,194 CD
360.1 CD
3,609,800 CD
3.60 CD
360 CD
360-DAY JJ
361,000 CD
36.125 CD
361,376 CD
36.13 CD
361.5 CD
361.8 CD
3.61 CD
36.23 CD
3.625 CD
36.25 CD
3.62 CD
36.2 CD
362 CD
3,632 CD
363.30 CD
363.35 CD
363.40 CD
3636.06 CD
36.36 CD
36.3 CD
363 CD
364.1 CD
3642.90 CD
3648.82 CD
3.64 CD
36.4 CD
36.50 CD
365.46 CD
3655.40 CD
3.65 CD
365 CD
365-DAY JJ
36.625 CD
366.27 CD
366.50 CD
366.55 CD
366.79 CD
366.85 CD
366.89 CD
3.66 CD
36.6 CD
367.10 CD
367.1 CD
367.30 CD
367.40 CD
367 CD
368.15 CD
368.24 CD
368.25 CD
368.27 CD
368.3 CD
368.4 CD
368.5 CD
368.70 CD
36.87 CD
368.87 CD
36.89 CD
3.68 CD
36.8 CD
368 CD
369,000 CD
369.10 CD
3.69 CD
36.9 CD
3.6 CD
36 CD
36-DAY JJ
36-MINUTE JJ
36-PAGE JJ
36-STORE JJ
36-YEAR-OLD JJ
370,000 CD
37,000 CD
370.20 CD
370.58 CD
370.60 CD
370.85 CD
370.8 CD
370 CD
371.1 CD
371.20 CD
3717.46 CD
3.71 CD
37.1 CD
372.14 CD
372.1 CD
372.50 CD
372.9 CD
3.72 CD
37.2 CD
37,300 CD
373.40 CD
373.48 CD
37.375 CD
373.80 CD
373.8 CD
3.73 CD
37.3 CD
373 CD
374.19 CD
374.20 CD
374.6 CD
374.70 CD
3.74 CD
374 CD
375,000 CD
37.50 CD
375.16 CD
375.40 CD
375.92 CD
375.9 CD
375-AN-OUNCE JJ
3.75 CD
37.5 CD
375 CD
376,000 CD
376.36 CD
376.80 CD
376.8 CD
3.76 CD
37.6 CD
376 CD
37.75 CD
377.60 CD
377.80 CD
37.7 CD
377 CD
378.07 CD
378.1 CD
37,820 CD
378.30 CD
37,860 CD
37.875 CD
378.87 CD
37.8 CD
378 CD
379.46 CD
379 CD
37-A-SHARE JJ
3.7 CD
37 CD
37-hour CD
37-HOUR CD
37th JJ
37TH JJ
37-YEAR-OLD JJ
38,000 CD
3,800-MAN JJ
380.80 CD
3.80 CD
380 CD
381,000 CD
38.1 CD
3,820,634 CD
382.2 CD
382-37 CD
382.81 CD
382.9 CD
38.2 CD
382 CD
38.32 CD
383-30 CD
38.375 CD
383.8 CD
383.9 CD
3.83 CD
38.3 CD
3.846 CD
38,489 CD
3.84 CD
38.4 CD
38.50 CD
3,855.60 CD
3.85 CD
38.5 CD
385 CD
386,000 CD
3.865 CD
3.86 CD
386 CD
387.4 CD
3.875 CD
38.75 CD
387.8 CD
3.87 CD
38.7 CD
388.5 CD
38.875 CD
38.8 CD
388 CD
389.6 CD
3.89 CD
38.9 CD
389 CD
3.8 CD
3\/8 CD
38 CD
38-CENTS-A-SHARE JJ
38-POUND JJ
38th NNP
38TH NNP
38-YEAR-OLD JJ
390,000 CD
39,000 CD
3,900 CD
390.5 CD
39.08 CD
3.90 CD
390 CD
390-million CD
390-MILLION CD
39.125 CD
39.19 CD
3.91 CD
391 CD
39.25 CD
3.92 CD
39.2 CD
392 CD
39,300 CD
39.31 CD
393.1 CD
393.4 CD
393 CD
39,400 CD
394-21 JJ
394.4 CD
39.4 CD
394 CD
395,000 CD
3,950 CD
395,374 CD
395.3 CD
395.4 CD
39.55 CD
395,700 CD
395,974 CD
3.95 CD
39.5 CD
395 CD
396,000 CD
39.68 CD
39.6 CD
396 CD
39.75 CD
3.97 CD
39.7 CD
397 CD
398,000 CD
398.3 CD
3.98 CD
39.8 CD
39.9 CD
399 CD
3.9 CD
39 CD
39-CENTS-A-POUND JJ
39-YEAR-OLD JJ
3-A-PERSON JJ
3-A-SHARE JJ
3 CD LS NNP
3COM NNP
3-DAY-OLD JJ
3-D JJ
3-FOR-1 JJ
3-FOR-2 JJ
3-FOR-3 JJ
3-INCH JJ
3M NNP
3RDAND CD
3RD-BIGGEST JJ
3RD-PERIOD JJ
3rd-Quarter NNP
3RD-QUARTER NNP
3-TYPE JJ
400,000 CD
40,000 CD
4,000 CD
400.0 CD
400.3 CD
400.4 CD
400 CD
400-DAY JJ
400-MEMBER JJ
400th JJ
400TH JJ
401-18 CD
40.125 CD
4.01 CD
40.1 CD
401 CD
402,000 CD
40.21 CD
402.4 CD
402.7 CD
4:02 CD
4.03 CD
40.3 CD
403 CD
404.1 CD
40,424 CD
404,294 CD
4.04 CD
40.4 CD
405,000 CD
40.50 CD
405.4 CD
405.9 CD
4.05 CD
40.5 CD
405 CD
406,000 CD
4.060 CD
4.065 CD
4.0675 CD
4.06 CD
40.6 CD
406 CD
4.0775 CD
407.9 CD
4.07 CD
40.7 CD
40,800 CD
40.86 CD
408 CD
4,090,000 CD
409,000 CD
40.9 CD
409 CD
40-A-SHARE JJ
4.0 CD
40 CD
4-0 JJ
40-MEGABYTE JJ
40-MILLION-TON-A-YEAR JJ
40-MINUTE JJ
40-POINT JJ
40S CD
'40s CD NNS
'40S CD NNS
40th JJ
40TH JJ
40-YEAR JJ
40-YEAR-OLD JJ
410,000 CD
41,000 CD
410.3 CD
410.4 CD
410.5 CD
4.10 CD
410 CD
41.18 CD
4.11 CD
41.1 CD
411 CD
4.12 CD
41.2 CD
412 CD
413,000 CD
4.13 CD
41.3 CD
413 CD
4.14 CD
41.4 CD
414 CD
415.3 CD
415.6 CD
415.8 CD
415.9 CD
4.15 CD
41.5 CD
415 CD
416,000 CD
41.60 CD
416,290,000 CD
416.3 CD
416 CD
4,170 CD
41.725 CD
41.75 CD
41.76 CD
4.17 CD
417 CD
41.8 CD
41,900 CD
4,199 CD
4.19 CD
4-1 CD
4.1 CD
41 CD
41-LAWYER JJ
41-year-old JJ CD
41-YEAR-OLD JJ CD
42,000 CD
420.68 CD
420.81 CD
4.20 CD
42.0 CD
420 CD
421,000 CD
42.1 CD
421 CD
422.1 CD
42.25 CD
422.5 CD
4.22 CD
422 CD
423.3 CD
423.5 CD
42,374 CD
42.375 CD
423.9 CD
4.23 CD
42.3 CD
423 CD
424.3 CD
42,455 CD
425,000 CD
425,000-SQUARE-FOOT JJ
425.4 CD
4.25 CD
42.5 CD
425 CD
42.60 CD
4.26 CD
427,300 CD
42.75 CD
427.7 CD
4.27 CD
42.7 CD
428,000 CD
42.875 CD
428 CD
4,290 CD
429.9 CD
42.9 CD
429 CD
42-A-SHARE JJ
42-BRANCH JJ
4.2 CD
42 CD
42-DAY JJ
42nd NNP
42ND NNP
4.2-TON JJ
42-YEAR JJ
42-YEAR-OLD JJ
430,000 CD
43,000 CD
4,300 CD
430.3 CD
4:30 CD
430 CD
4.31 CD
43.1 CD
431 CD
4,320 CD
432.61 CD
432.6 CD
432.78 CD
4.32 CD
4\/32 CD
43.2 CD
432 CD
433.2 CD
43.34 CD
433.5 CD
43.375 CD
43.3 CD
433 CD
4,343 CD
434.4 CD
4,345 CD
4,346 CD
4,348 CD
4,350 CD
43.50 CD
435.11 CD
435.5 CD
4.35 CD
43.5 CD
435 CD
436,000 CD
436.01 CD
436.3 CD
43.6 CD
437.4 CD
4.375 CD
43.75 CD
437.5 CD
437.68 CD
437.7 CD
43.7 CD
437 CD
438.15 CD
43.875 CD
438,845 CD
4.38 CD
4,393,237 CD
439.3 CD
4.39 CD
439 CD
4.3 CD
43 CD
43-FOOT JJ
43%-OWNED JJ
43-YEAR-OLD JJ
44,000 CD
4,400 CD
4400 CD
44.08 CD
440.99 CD
4.40 CD
440 CD
441.1 CD
44.125 CD
4.41 CD
44.1 CD
44.2 CD
443.6 CD
44.375 CD
44.3 CD
443 CD
44,400 CD
4,440 CD
444.19 CD
444.9 CD
444 CD
445.02 CD
44.50 CD
445.23 CD
445,645 CD
445.7 CD
4.45 CD
44.5 CD
445 CD
446,000 CD
44.625 CD
446.5 CD
446.62 CD
4,469,167 CD
4.469 CD
4.46 CD
44.6 CD
447.76 CD
44,796 CD
4.47 CD
44.7 CD
448.49 CD
44.875 CD
44,877 CD
448.80 CD
4.48 CD
448 CD
449.04 CD
44.92 CD
449.33 CD
449.3 CD
449.89 CD
4.49 CD
44.9 CD
449 CD
4.4 CD
4\/4 CD
44 CD
44-CENT-A-BARREL JJ
44-YEAR-OLD JJ
450,000 CD
45,000-$60,000 CD
45,000 CD
4,500 CD
45.00 CD
450.7 CD
4.50 CD
450 CD
451.37 CD
451.6 CD
4.51 CD
451 CD
452.23 CD
4525 CD
452.75 CD
452.76 CD
4.52 CD
45.2 CD
452 CD
453,000 CD
453.05 CD
453.4 CD
453.57 CD
45.3 CD
453 CD
454,100 CD
454.6 CD
454.86 CD
4.54 CD
45.4 CD
454 CD
455,000 CD
45.50 CD
455.29 CD
455,410 CD
4,555 CD
455.63 CD
4.55 CD
456.08 CD
456.2 CD
456.4 CD
456.64 CD
45.66 CD
4.56 CD
457.52 CD
45.75 CD
457.5 CD
457.7 CD
457.9 CD
457 CD
458.15 CD
458.32 CD
458.52 CD
458.8 CD
4.58 CD
458 CD
459.93 CD
4.59 CD
45-ACRE JJ
45-A-SHARE JJ
4.5 CD
45 CD
45-MEMBER JJ
45%-OWNED JJ
45th JJ
45TH JJ
45-YEAR-OLD JJ
460.05 CD
4,600 CD
46.02 CD
460.33 CD
460.98 CD
460 CD
461.1 CD
461,200 CD
46.125 CD
46.12-POINT JJ
461,539,056 CD
461.6 CD
461.70 CD
461.9 CD
46.1 CD
461 CD
462.2 CD
46,245,000 CD
4.625 CD
46.25 CD
462.89 CD
462.8 CD
462,900 CD
462.98 CD
462.9 CD
46.2 CD
462 CD
463.06 CD
4,631,400 CD
463.28 CD
4.63 CD
46.3 CD
4,645 CD
464.7 CD
465,000 CD
46.50 CD
4.65 CD
46.5 CD
465 CD
466,000 CD
4.66 CD
46.6 CD
466 CD
467.22 CD
467.29 CD
4.67 CD
46.7 CD
467 CD
46.80 CD
46,835 CD
4.6875 CD
46,892 CD
4.68 CD
46.8 CD
469.4 CD
4,695 CD
469.6 CD
469.8 CD
46,995 CD
46.9 CD
469 CD
4.6 CD
46 CD
46-YEAR-OLD JJ
470,000 CD
47,000 CD
47.013 CD
470.67 CD
470.80 CD
4.70 CD
470 CD
470th JJ
470TH JJ
471.1 CD
47.125 CD
471.60 CD
471.6 CD
47.17 CD
47.1 CD
4,720 CD
47.24 CD
472.5 CD
47.2 CD
472 CD
473.29 CD
473.9 CD
47.3 CD
473 CD
474.1 CD
47.46 CD
4.74 CD
47.4 CD
4,750,000 CD
475,000 CD
47.50 CD
475.35 CD
475.6 CD
4.75 CD
47.5 CD
475 CD
476.14 CD
476.5 CD
4.76 CD
47.6 CD
476 CD
477.00 CD
477.1 CD
4,773 CD
47.7 CD
478.28 CD
47.85 CD
478.9 CD
478 CD
479.7 CD
47.9 CD
479 CD
4.7 CD
47 CD
47%-controlled CD
47%-CONTROLLED CD
47-STORE JJ
47-YEAR-OLD JJ
48,000 CD
4,800-ACRE JJ
4,800 CD
480.4 CD
4.80 CD
480 CD
481,000 CD
48,100 CD
48.125 CD
4.81 CD
481 CD
482.39 CD
482.3 CD
4.82 CD
48.2 CD
4,830 CD
48.375 CD
4.83 CD
4.84-A-SHARE JJ
484 CD
485,000 CD
48.5 CD
485 CD
486.1 CD
486.30 CD
486.6 CD
486.74 CD
486-BASED JJ
48.6 CD
486 CD
486tm NN
486TM NN
4.875 CD
487.8 CD
48.7 CD
487 CD
488.60 CD
4.88 CD
488 CD
4.898 CD
489.9 CD
48.9 CD
4.8 CD
48 CD
48-HOUR JJ
48-MONTH JJ
48-YEAR JJ
48-YEAR-OLD JJ
49,000 CD
49,000-PLUS JJ
4,900 CD
4.90 CD
490 CD
491.10 CD
49.125 CD
491.50 CD
49.1 CD
4.92 CD
49.2 CD
492 CD
4,930 CD
49.375 CD
4.93 CD
49.3 CD
493 CD
494,100 CD
494.4 CD
494.50 CD
494.8 CD
49.4 CD
495,000 CD
4.95 CD
49.5 CD
495 CD
496,116 CD
496.7 CD
49.6 CD
496 CD
497.1 CD
497.34 CD
497,400 CD
4.97 CD
49.7 CD
49.8 CD
498 CD
499.4 CD
4,995 CD
49.96 CD
4,999 CD
4.99 CD
49.9 CD
4.9 CD
49 CD
49-MEMBER JJ
49-NATION JJ
49%-OWNED JJ
49-YEAR-OLD JJ
4-A-BUSHEL JJ
4 CD LS
4-Dec. NNP
4-DEC. NNP
4-FOR-1 JJ
4-KILOBIT JJ
4th JJ
4TH JJ
500,000 CD
500,004 CD
50,000 CD
50,005,000 CD
5,000 CD
5000 CD
5,000-ROOM JJ
50.01 CD
500.20 CD
500.26 CD
50,085 CD
500-BED JJ
5.00 CD
500 CD
500-lawyer NN
500-LAWYER NN
500-SEAT JJ
500-stock JJ NNP CD
500-STOCK JJ NNP CD
500-Stock NNP
500-STORE JJ
501,200 CD
50.161 CD
501.61 CD
5.01 CD
50.1 CD
501 CD
50.1%-OWNED JJ
502,000 CD
502.1 CD
502 CD
503.1 CD
503.2 CD
50.38 CD
5.03 CD
50.3 CD
50,400 CD
504,200 CD
504.2 CD
50.45 CD
504.5 CD
50.46 CD
5:04 CD
5.04 CD
50.4 CD
504 CD
50.50 CD
50\/50 CD
50-50 JJ CD
505-455 CD
50.59 CD
5.05 CD
50.5 CD
50.6 CD
50.7 CD
507 CD
50.875 CD
5,088,774 CD
5,088 CD
50.8 CD
508 CD
508-POINT JJ
50.9375 CD
5:09 CD
5.09 CD
50.9 CD
509 CD
50-A-SHARE JJ
50-BY-50-FOOT JJ
.50 CD
5-0 CD
5.0 CD
50 CD
50%-LEVERAGED JJ
50-POINT JJ
'50s NNS CD
'50S NNS CD
50-STATE JJ
50%-STATE-OWNED JJ
50-STORY JJ
50th JJ
50TH JJ
50-YEAR JJ
50-YEAR-OLD JJ
510,000 CD
51,000 CD
5\/100 CD
510.1 CD
510.6 CD
5.10 CD
5-10 JJ
5.11 CD
51.1 CD
511 CD
51.23 CD
5.125 CD
51.25 CD
5-12 CD
5.12 CD
51.2 CD
512 CD
5.133 CD
5.13 CD
51.3 CD
51-48 JJ CD
51.4 CD
51.50 CD
515.1 CD
515.4 CD
51.5 CD
515 CD
5.163 CD
51.65 CD
516.9 CD
5.16 CD
5\/16 CD
51.6 CD
516 CD
517,500 CD
51.75 CD
517.85 CD
5.17 CD
517 CD
51.81 CD
518.7 CD
51.8 CD
518 CD
51,911,566 CD
5.1950 CD
5.19 CD
51.9 CD
519 CD
51-CASH JJ
5-1 CD
5.1 CD
51 CD
51-DAY JJ
51%-HELD JJ
51-YEAR-OLD JJ
520,000 CD
52,000 CD
5,200 CD
52,012 CD
5.20 CD
520 CD
520-LAWYER JJ
52.125 CD
521.2 CD
521.4 CD
5.2180 CD
52.1 CD
521 CD
522.3 CD
52.25 CD
52.2 CD
522 CD
523,000 CD
52%-36 CD
523.6 CD
5.237 CD
523,920,214 CD
5.23 CD
5.245 CD
524.5 CD
52.4 CD
525,000 CD
52.50 CD
525,546 CD
525.8 CD
5.25 CD
525 CD
526.2 CD
526.3 CD
5,267,238 CD
526.79 CD
52.6 CD
526 CD
527,000 CD
527.39 CD
5,273 CD
52.75 CD
5.276 CD
5.27 CD
52.7 CD
527 CD
5.2830 CD
528.3 CD
528.4 CD
528.56 CD
5.28 CD
52.8 CD
528 CD
529.32 CD
5.29 CD
52.9 CD
529 CD
5.2 CD
52 CD
52-PAGE JJ
52-STORE JJ
52-WEEK JJ
52-YEAR-OLD JJ
5:30 CD
530 CD
5.315 CD
53.1 CD
532,000 CD
53.25 CD
5.32 CD
5\/32 CD
53.2 CD
532 CD
5.33 CD
53.3 CD
534,000 CD
534.3 CD
53-45 JJ
53,496,665 CD
53.4 CD
534 CD
5,350,000 CD
535,322 CD
5.355 CD
5.35 CD
535 CD
536,000 CD
536.04 CD
53.63 CD
536.94 CD
5.36 CD
53.6 CD
53.75 CD
5,377,000 CD
537.91 CD
5.37 CD
53.7 CD
537 CD
538,000 CD
538.5 CD
53.875 CD
5.38 CD
539.4 CD
5.39 CD
53.9 CD
5.3 CD
53 CD
53-FLOOR JJ
53%-OWNED JJ
53RD CD
53-YEAR-OLD JJ
54,000 CD
5,400 CD
540.9 CD
5:40 CD
5.40 CD
540 CD
5.41 CD
54.1 CD
541 CD
5.42 CD
542 CD
543,000 CD
5.435 CD
543.5 CD
5.43 CD
54.3 CD
5,440 CD
5,441,000 CD
544,681 CD
5.44 CD
54.4 CD
544 CD
54.50 CD
54.51 CD
545.3 CD
54.58 CD
545.96 CD
54.5 CD
54.625 CD
54.6 CD
547,000 CD
547,347,585 CD
54.75 CD
5.47 CD
547 CD
54.875 CD
548.9 CD
54.8 CD
549,365 CD
5498 CD
549.9 CD
54.9 CD
5.4 CD
54 CD
5-4 JJ
54-YEAR-OLD JJ
5,500,000 CD
550,000 CD
55,000 CD
5,500 CD
5,502 CD
5.50 CD
550 CD
55.10 CD
55.1 CD
551 CD
552,302 CD
5.52 CD
55.2 CD
552 CD
55.375 CD
55.3 CD
554 CD
55,500 CD
555.5 CD
555.6 CD
55.59 CD
555 CD
556.5 CD
5.56 CD
55.6 CD
557,000 CD
55,730,000 CD
557.7 CD
5.57 CD
55.7 CD
557 CD
558.50 CD
55.875 CD
5.58 CD
55.8 CD
558 CD
5,599 CD
55-ACRE JJ
55-A-SHARE JJ
5.5 CD
55 CD
55-MEGAWATT JJ
55%-OWNED JJ
55th JJ NNP
55TH NNP JJ
55-year-old JJ NN
55-YEAR-OLD JJ NN
56,000 CD
5,600 CD
560,839 CD
560 CD
56.13 CD
56.1 CD
5.625 CD
56.25 CD
562 CD
563.8 CD
5.63 CD
5.64 CD
56.4 CD
565,000 CD
5,651 CD
56,565,000 CD
5.65 CD
56.625 CD
566.54 CD
5.66 CD
566 CD
5.67 CD
56.875 CD
569,000 CD
56,900 CD
5,699 CD
56.9 CD
5.6 CD
56 CD
56-YEAR-OLD JJ
570,000 CD
57,000 CD
5,700 CD
5.70 CD
570 CD
57.125 CD
57.24 CD
57.2 CD
572 CD
57.375 CD
5,745,188 CD
574.7 CD
5.74 CD
57.4 CD
575,000 CD
57,500 CD
57.50 CD
575.1 CD
5.75 CD
57.5 CD
575 CD
5,760 CD
57.625 CD
5.76 CD
57.6 CD
576 CD
5,773 CD
577.3 CD
5.77 CD
57.7 CD
577 CD
5,782 CD
57.82 CD
57.87 CD
57.8 CD
578 CD
5,791 CD
57.9 CD
5.7 CD
57 CD
57-MONTH JJ
57th NNP JJ
57TH NNP JJ
57-year-old JJ NN
57-YEAR-OLD JJ NN
58,000 CD
580.4 CD
580.6 CD
5.80 CD
580 CD
5,810 CD
5.8125 CD
581-7907 CD
5.81 CD
5,824 CD
582.6 CD
5.82 CD
58.2 CD
582 CD
5.83 CD
58.3 CD
5.84 CD
584 CD
585,000 CD
58.50 CD
5.85 CD
585 CD
585-lawyer NN
585-LAWYER NN
58.64 CD
5.86 CD
58.6 CD
58.75 CD
5.87 CD
58.7 CD
587 CD
588,300 CD
588,350,000 CD
588,800 CD
58.8 CD
58.97 CD
58.9 CD
589 CD
58-A-SHARE JJ
5.8 CD
5\/8 CD
58 CD
58-YEAR-OLD JJ
5,900 CD
590.7 CD
5.91 CD
5.92 CD
59.2 CD
592 CD
593.5 CD
59.3 CD
593 CD
5.94 CD
59.4 CD
59.50 CD
59.5 CD
595 CD
5,960 CD
596.8 CD
59.6 CD
597.8 CD
59.7 CD
597 CD
59.8 CD
598 CD
599.1 CD
599.4 CD
599.9 CD
5.99 CD
59.9 CD
5.9 CD
59 CD
59-DEALER JJ
59-STORE JJ
59-YEAR-OLD JJ
5-A-BARREL JJ
5 CD LS
5-fluorouracil NN
5-FLUOROURACIL NN
5-for-24 CD
5-FOR-24 CD
5th JJ
5TH JJ
600,000 CD
60,000 CD
60,000-ODD JJ
6,000 CD
6,000-MEMBER JJ
6.00 CD
600 CD
600-POINT JJ
600-SHIP JJ
601.3 CD
60.1 CD
60.25 CD
60.25-POINT JJ
6.02 CD
60.2 CD
602 CD
60.36 CD
6.03 CD
60.3 CD
603 CD
60-40 JJ
604.72 CD
60.4 CD
604 CD
6,050 CD
6.056 CD
6.05 CD
60.5 CD
605 CD
60.6 CD
6.07 CD
60.7 CD
608,413 CD
6.08 CD
6.09 CD
60.9 CD
609 CD
60 CD NNP
60-DAY JJ
60-FOOT JJ
60%-HELD JJ
60-INCH JJ
60-MONTH JJ
60%-OWNED JJ
60-SECOND JJ
'60s NNS CD
'60S NNS CD
60-TO-65-DAY JJ
60-VOTE JJ
60-YEAR JJ
60-YEAR-OLD JJ
6.10 CD
610 CD
61.125 CD
611.62 CD
6.11 CD
613.7 CD
613 CD
61.41 CD
614.5 CD
614.6 CD
61,493 CD
61.4 CD
614 CD
615,000 CD
6.15 CD
615 CD
61.5-POINT JJ
6.16 CD
616 CD
61.7 CD
617 CD
618,000 CD
618.1 CD
618.69 CD
618.6 CD
61.875 CD
618.9 CD
6.18 CD
618 CD
619.8 CD
6.19 CD
619 CD
6.1 CD
61 CD
61%-OWNED JJ
61-YEAR-OLD JJ
62,000 CD
62.04 CD
620.5 CD
6.20 CD
620 CD
621,624 CD
6.21 CD
62.1 CD
621 CD
62.25 CD
6.22 CD
62.2 CD
622 CD
623.5 CD
62.36 CD
62,372.95 CD
6.23 CD
62.3 CD
623 CD
62.42 CD
6.24 CD
6,250,000 CD
625,000 CD
62.50 CD
625.4 CD
6,256 CD
6.25 CD
62.5 CD
625 CD
62.625 CD
626.3 CD
6.26 CD
62.6 CD
626 CD
627,000 CD
62.70 CD
62.75 CD
627.7 CD
6.27 CD
62.7 CD
62,800 CD
62,872 CD
62.875 CD
62.8 CD
628 CD
629 CD
62-A-SHARE JJ
6.2 CD
6\/2 CD
62 CD
62nd JJ
62ND JJ
62%-OWNED JJ
62-YEAR-OLD JJ
630.9 CD
6:30 CD
6.30 CD
630 CD
631,163 CD
6.31 CD
63.1 CD
6,320 CD
63.25 CD
6\/32 CD
632 CD
63.375 CD
633.8 CD
6.34 CD
63.50 CD
63.52 CD
6.35 CD
63.5 CD
635 CD
6.36 CD
63.6 CD
637.5 CD
637.7 CD
6,379,884 CD
63.79 CD
637 CD
638,000 CD
63.875 CD
63.8 CD
63,971 CD
639.9 CD
63.9 CD
6.3 CD
63 CD
63-YEAR-OLD JJ
640,000 CD
64,000 CD
6,400 CD
6.40 CD
640 CD
64.125 CD
641.5 CD
64.1 CD
6,420,268 CD
642.2 CD
64.2 CD
642 CD
643.3 CD
643.4 CD
64-35 CD
6.43 CD
6.44 CD
644 CD
645,000 CD
645-293 CD
6.45 CD
64.5 CD
645 CD
6.46 CD
647.33 CD
647.33-POINT JJ
6,475,000 CD
6.47 CD
647 CD
6,480 CD
648.2 CD
6,495 CD
6,499 CD
64.9 CD
6-4 CD
6.4 CD
64 CD
64-INCH JJ
64-YEAR-OLD JJ
6,500,000 CD
650,000 CD
65,000 CD
6,500 CD
650.9 CD
6:50 CD
6.50 CD
650 CD
650-OR-SO JJ
6.51 CD
65,200 CD
6.52 CD
65.2 CD
6.53 CD
6,542,000 CD
654.5 CD
65.4 CD
654 CD
65.53 CD
6.55 CD
655 CD
65,619 CD
656.5 CD
6.56 CD
65.6 CD
656 CD
657.517 CD
65.7 CD
657 CD
658 CD
6.59 CD
65.9 CD
6.5 CD
65 CD
65-DAY JJ
65TH JJ NNP
65th NNP JJ
65-YEAR-OLD JJ
660 CD
66,100 CD
6.61 CD
6.625 CD
6.62 CD
662 CD
663,000 CD
66.375 CD
6.63 CD
663 CD
664.3 CD
664.83 CD
664 CD
66.50 CD
6.65 CD
66.5 CD
666-1260 CD
666,666 CD
6.66 CD
66.6 CD
666 CD
66,743 CD
66.7 CD
667 CD
66.8 CD
668 CD
6.69 CD
66.9 CD
6.6 CD
66 CD
66-YEAR-OLD JJ
67,000 CD
670.3 CD
6.70 CD
670 CD
671,000 CD
67.125 CD
6.71 CD
67.1 CD
671 CD
6,727,042 CD
672 CD
67-31 CD
673.3 CD
673 CD
67,400 CD
67.40 CD
6,744,600 CD
6.74 CD
675,400,000 CD
6.75 CD
675 CD
6.76 CD
6,773 CD
67.75 CD
67.7 CD
677 CD
67.8 CD
678 CD
679,000 CD
679.5 CD
67,972 CD
6,799 CD
6.79 CD
67.9 CD
6.7 CD
67 CD
67-YEAR-OLD JJ
6,805 CD
680.6 CD
6.80 CD
680 CD
6.81 CD
68.1 CD
68,230,000 CD
682.7 CD
68.2 CD
683,000 CD
68.3 CD
683 CD
6,840 CD
68.42 CD
6.84 CD
68.4 CD
684 CD
685,000 CD
68,548 CD
6.85 CD
68.5 CD
686.7 CD
687 CD
6,881 CD
68.8 CD
68.9 CD
'68 CD
6.8 CD
68 CD
68-OUNCE JJ
68-WEEK JJ
68-YEAR-OLD JJ
69,000 CD
6.90 CD
690 CD
69,105 CD
691.09 CD
69.1 CD
69-26 CD
69.2 CD
692 CD
6,930,000 CD
693.4 CD
6.94 CD
69.4 CD
694 CD
69,553 CD
6.95 CD
69.5 CD
696.1 CD
6.96 CD
69.6 CD
696 CD
6.97 CD
69.7 CD
6.98 CD
69.8 CD
698 CD
69,980 CD
6.99 CD
699 CD
6.9 CD
69 CD
69-POINT JJ
6-A-SHARE JJ
6 CD
6-TO-8-FOOT-HIGH JJ
700,000 CD
70,000 CD
7,000 CD
700.2 CD
700 CD
700-ROOM JJ
7.01 CD
70.1 CD
701 CD
702.4 CD
7.02 CD
70.2 CD
70-30 JJ
70,315,000 CD
7.03 CD
70.3 CD
703 CD
704.4 CD
7.04 CD
705.6 CD
7.05 CD
70.5 CD
705 CD
70.5-POINT JJ
7.06 CD
70.6 CD
70,765 CD
70.7 CD
707-PENCE JJ
707s NNPS
707S NNPS
708,000 CD
7.0808 CD
7.081 CD
7.0826 CD
7.08 CD
708 CD
7.09 CD
70.9 CD
709 CD
70-A21 CD
70-A-SHARE JJ
7.0 CD
70 CD
70-LAWYER JJ
'70s NNS CD
'70S NNS CD
7\/100THS CD
710.5 CD
7.10 CD
711.9 CD
7-11 CD
711 CD
7.125 CD
71.25 CD
7.12 CD
712 CD
71,309 CD
713.5 CD
71.36 CD
7:13 CD
7.13 CD
7.145 CD
7.14 CD
715.1 CD
7.15 CD
71.5 CD
715 CD
7.160 CD
7.16 CD
7\/16 CD
71.6 CD
717,000 CD
71.75 CD
7.17 CD
71.7 CD
71,895 CD
719,000 CD
7.19 CD
71.9 CD
'71 CD
7.1 CD
71 CD
71%-CONTROLLED JJ
71%-owned CD JJ
71%-OWNED JJ CD
720,000 CD
7.20 CD
720 CD
721 CD
7.227 CD
7.22 CD
72.2 CD
722 CD
72.3 CD
723 CD
724.4 CD
724,579 CD
7.24 CD
72.4 CD
725.6 CD
725.8 CD
7.25 CD
72.5 CD
725 CD
7.26 CD
72.6 CD
7.272 CD
72.7 CD
727 NNP CD
7.282 CD
728.5 CD
728.8 CD
7-28 CD
728 CD
729.04 CD
7.29 CD
729 CD
72-A-SHARE JJ
7.2 CD
72 CD
72-FRANC JJ
72-GAME JJ
72-HOUR JJ
72%-OWNED JJ
72-yearold CD
72-YEAROLD CD
72-YEAR-OLD JJ
730,070 CD
730.1 CD
730.37 CD
7:30 CD
7.30 CD
730 CD
73,100 CD
7.31 CD
7.32 CD
7\/32 CD
7.33 CD
734,000 CD
734.2 CD
734.41 CD
734.8 CD
734.9 CD
7.34 CD
73.50 CD
7.35 CD
73.5 CD
735 CD
7.36 CD
73.6 CD
736 CD
737-300 NNP
7.375 CD
737.5 CD
7.37 CD
737 CD
73,803 CD
7.38 CD
73.8 CD
73.97 CD
7.3 CD
73 CD
73-YEAR-OLD JJ
74,000 CD
7,400 CD
7.40 CD
74.125 CD
7.41 CD
74.20 CD
7.422 CD
7.42 CD
742 CD
74,351 CD
74.35 CD
743.7 CD
7.43 CD
7,440 CD
7.445 CD
74.48 CD
74.4 CD
744 CD
745.7 CD
7.458 CD
7.45 CD
74.5 CD
746 CD
747-100s CD
747-100S CD
747.3 CD
747-400 NNP JJ
747-400s CD NNS
747-400S NNS CD
747.7 CD
747.8 CD
7.47 CD
747 CD NNP
74.8 CD
748 CD
74.9 CD
749 CD
7.4 CD
74 CD
74%-OWNED JJ
750,000 CD
75,000 CD
7,500 CD
7,500-SHARE JJ
75,075,000 CD
750-CAR-A-DAY JJ
7.50 CD
750 CD
750th JJ
750TH JJ
751.4 CD
7.51 CD
75.1 CD
751 CD
75.25 CD
752.9 CD
7.52 CD
75.2 CD
752 CD
7:53 CD
7.53 CD
75.3 CD
753 CD
75.41 CD
754.4 CD
7.54 CD
754 CD
755,000 CD
75,500 CD
75.50 CD
755.9 CD
7.55 CD
75.5 CD
75.625 CD
756.3 CD
7.567 CD
7.56 CD
75.6 CD
756 CD
757-200s NNS
757-200S NNS
757.4 CD
75.75 CD
7.57 CD
75.7 CD
757 CD NNP
7,580 CD
75.875 CD
7.58 CD
75.8 CD
7,592,988 CD
7.5 CD
75 CD
75-CENT JJ
75-cents-an-hour NNS
75-CENTS-AN-HOUR NNS
75-DAY JJ
75-LAWYER JJ
75th JJ
75TH JJ
75-year-old CD
75-YEAR-OLD CD
76,000 CD
7,600 CD
7.60 CD
760 CD
760-MEGABYTE JJ
761.38 CD
7.61 CD
762.4 CD
7.625 CD
7.62 CD
7.63 CD
763 CD
7.649 CD
76.4 CD
76.50 CD
7.65 CD
76.5 CD
765 CD
76.66 CD
76.6 CD
767-300ER NNP
767-300 NNP
767.9 CD
76.7 CD
767 CD NNP
76.8 CD
76.9 CD
7.6 CD
76 CD
76-PAGE JJ
76-STORY JJ
77,000 CD
7.70 CD
771.4 CD
7.71 CD
7.72 CD
77.2 CD
773.94 CD
7.73 CD
77.3 CD
774,000 CD
7.74 CD
774 CD
775,000 CD
77,500 CD
77.56 CD
7.75 CD
775 CD
776,470 CD
77.6 CD
77.70 CD
7.77 CD
77.7 CD
777 CD
778.6 CD
7.78 CD
778 CD
779.8 CD
7.79 CD
7.7 CD
77 CD
77-YEAR JJ
77-YEAR-OLD JJ
780,000 CD
7,800 CD
78.06 CD
780.6 CD
7.80 CD
780 CD
7.81 CD
7.82 CD
7,839 CD
783 CD
784.5 CD
784.9 CD
7.84 CD
78.4 CD
784 CD
78.50 CD
785.1 CD
7.85 CD
785 CD
78,600 CD
786,100 CD
78,625 CD
78.625 CD
78.64 CD
786,700 CD
786,860,000 CD
7.86 CD
78.6 CD
786 CD
787.02 CD
7.875 CD
7.87 CD
787 CD
788.8 CD
7.88 CD
78.8 CD
788 CD
789,000 CD
789.87 CD
7.89 CD
789 CD
7.8 CD
7\/8 CD
78 CD
78-YEAR-OLD JJ
790.2 CD
79.03 CD
7.904 CD
7.90 CD
79.18 CD
7.91 CD
79.1 CD
791 CD
7.92 CD
79.2 CD
792 CD
7.937 CD
7.93 CD
79.3 CD
793 CD
7.94 CD
79.4 CD
7.955 CD
795,900 CD
7.95 CD
7.962 CD
7.96 CD
7.97 CD
797 CD
7.986 CD
7.98 CD
7.99 CD
7.9 CD
79 CD
79-CENTS-A-POUND JJ
79-YEAR-OLD JJ
7A NN
7-A-SHARE JJ
7B NN
7 CD
7-Eleven NNP
7-ELEVEN NNP
800,000 CD
80,000 CD
8,000 CD
800-462-9029 CD
8.007 CD
8.0087 CD
800-ACRE JJ
8.00 CD
800 CD
800-line NN
800-LINE NN
800-number NN
800-NUMBER NN
800-YEAR-OLD JJ
801.21 CD
801.2 CD
801.6 CD
801,835 CD
8.019 CD
8:01 CD
8.01 CD
8.02 CD
802 CD
8.032 CD
803.7 CD
80386 CD
8.03 CD
80.3 CD
804.3 CD
80486 CD
8.04 CD
805,000 CD
80.50 CD
80.53 CD
8.05 CD
806.7 CD
806.8 CD
8.06 CD
80.6 CD
806 CD
807.5 CD
807.6 CD
8.07 CD
807 CD
808.3 CD
8086 CD
8088 CD
8.08 CD
80.8 CD
8.09 CD
80 CD
80-lawyer NN
80-LAWYER NN
80-MEGABYTE JJ
80-NATION JJ
80%-owned JJ CD
80%-OWNED JJ CD
80-PAGE JJ
80-PLAYER JJ
80-PLUS JJ
80%-PLUS JJ
80-POINT JJ
80-SECOND JJ
80s NNS
80S NNS
'80s NNS CD
'80S NNS CD
80-YEAR-OLD JJ
81,000 CD
8,100 CD
810,700 CD
8-10 CD
8.10 CD
8%-10 CD
810 CD
81.125 CD
811.9 CD
8-11 CD
8.11 CD
811 CD
8.1255 CD
8.125 CD
8.12 CD
81.2 CD
813.4 CD
8.13 CD
813 CD
814,000 CD
814.1 CD
814.8 CD
8.14 CD
814 CD
815,000 CD
81.50 CD
8.15 CD
81.5 CD
816,000 CD
8.16 CD
81.6 CD
817.5 CD
8.17 CD
8.18 CD
81.8 CD
8.19 CD
81.9 CD
8.1 CD
81 CD
81%-CONTROLLED JJ
81%-OWNED JJ
81-YEAR-OLD JJ
820.4 CD
8.20 CD
821-201 CD
8.21 CD
82.1 CD
822.8 CD
8.22 CD
82.2 CD
822 CD
82,348 CD
82,389 CD
8.23 CD
8.24 CD
824 CD
82.50 CD
8.25 CD
82.5 CD
8.26 CD
82.6 CD
827.9 CD
8.27 CD
82.7 CD
8.28 CD
82.8 CD
8.292 CD
829.9 CD
8.29 CD
829 CD
'82 CD
8-2 CD
8.2 CD
82 CD
82-DAY JJ
82nd JJ
82ND JJ
830,000 CD
8300 CD JJ
8300 JJ CD
8300s NNS
8300S NNS
830.5 CD
8:30 CD
8.30 CD
830 CD
8.31 CD
83,206 CD
8.325 CD
8.328 CD
8.32 CD
8\/32 CD
83.3125 CD
833.6 CD
8.337 CD
8.33 CD
83.3 CD
833 CD
8.347 CD
8.34 CD
83.4 CD
8,355 CD
8:35 CD
8.35 CD
835 CD
8.36 CD
83.6 CD
8.375 CD
837.5 CD
8.37 CD
83.7 CD
837 CD
838.3 CD
8,385 CD
8.3875 CD
8.387 CD
8.38 CD
83.8 CD
838 CD
839.4 CD
83,950 CD
8.395 CD
839 CD
8.3 CD
83 CD
83-YEAR-OLD JJ
840,000 CD
840.4 CD
840.8 CD
8.40 CD
84.15 CD
841.5 CD
84.1 CD
841 CD
8.425 CD
84.29 CD
8.42 CD
8.43 CD
84.3 CD
843 CD
8.44 CD
84.4 CD
84,500 CD
8.457 CD
845.7 CD
8:45 CD
8.45 CD
845 CD
8.467 CD
8.46 CD
846 CD
84-6 JJ RB
84-6 RB JJ
8.475 CD
84.75 CD
8.47 CD
84.7 CD
847 CD
84.82 CD
8.483 CD
848.7 CD
8.48 CD
84.90 CD
8.49 CD
84.9 CD
849 CD
8.4 CD
84 CD
84%-CONTROLLED JJ
84-MONTH JJ
84-YEAR-OLD JJ
8,500,000 CD
850,000 CD
85,000 CD
8,500 CD
8.50 CD
850 CD
851,000 CD
85.1 CD
851 CD
852,000 CD
8,524 CD
8.525 CD
8.52 CD
852 CD
85.339 CD
8.53 CD
85.3 CD
85.49 CD
8.54 CD
8,550 CD
85.50 CD
8.55 CD
855 CD
85.60 CD
856.3 CD
8.56 CD
857-161 CD
8.575 CD
85.7 CD
857 CD
858,000 CD
85.8 CD
8,590 CD
859.2 CD
859.5 CD
8.59 CD
8.5 CD
85 CD
85-TITLE JJ
8.60 CD
86.12 CD
8.61 CD
861 CD
8.625 CD
8.62 CD
86.2 CD
862 CD
8.63 CD
86.3 CD
864.1 CD
8.64 CD
86.4 CD
86,500 CD
86.50 CD
86,525,000 CD
86,555 CD
8.65 CD
866 CD
8.685 CD
8.68 CD
868 CD
869 CD
'86 CD
8.6 CD
86 CD
8,700 CD
87.026 CD
8.70 CD
871-0090 CD
87.1 CD
871 CD
87.25 CD
87.2 CD
872 CD
8.734 CD
87.375 CD
873.9 CD
8.74 CD
87.4 CD
874 CD
87.57 CD
8.75 CD
87.5 CD
875 CD
876,706 CD
876 CD
877,663 CD
877.6 CD
8.77 CD
87-7 CD
87.7 CD
877 CD
8.78 CD
878 CD
879,000 CD
8.79 CD
87.9 CD
879 CD
'87 CD
8.7 CD
87 CD
87-STORE JJ
880,000 CD
880,500 CD
880.9 CD
8.80 CD
880 CD NNP
88.12 CD
88.12-POINT JJ
881,969 CD
8.81 CD
88.1 CD
8.820 CD
8.82 CD
88.32 CD
88.35 CD
8,839 CD
88.3 CD
884,000 CD
884 CD
88,500 CD
885,800 CD
8.85 CD
88.5 CD
886 CD
8.875 CD
8.87 CD
88.7 CD
8,880 CD
8.88 CD
88.8 CD
889,000 CD
8.8 CD
88 CD
88-POINT JJ
88-POINTS JJ
88-YEAR JJ
8.903 CD
8.90 CD
890 CD
89-107 CD
89108 CD
89-136 CD
89.2 CD
8,930,000 CD
89,300 CD
8934014 CD
8940061 CD
894 CD
89,500-A-YEAR JJ
89,500 CD
89-52 CD
8.95 CD
89.5 CD
8.96 CD
89.6 CD
897.2 CD
89.75 CD
89.7 CD
89.875 CD
8.98 CD
899.6 CD
899.8 CD
8.99 CD
89.9 CD
8-9 CD
8.9 CD
89 CD
8 CD
8th JJ
8TH JJ
8-TO-5 JJ
900,000 CD
90,000 CD
9,000 CD
9000 CD
9.008 CD
900 CD
900-INTERACTIVE JJ
900-TELELAW NN
90.1 CD
90.20 CD
9,023 CD
9.03 CD
903 CD
904,000 CD
904 CD
90,552 CD
9.05 CD
90.5 CD
905 CD
90.625 CD
9.06 CD
90.6 CD
9.07 CD
908.8 CD
909 CD
90 CD
90-CENT-AN-HOUR JJ
90-DAY JJ
90-FOOT JJ
90-MINUTE JJ
90-POUND JJ
'90s NNS CD
'90S NNS CD
90-YEAR JJ
9-10:30 CD
9-10 CD
911,606 CD
9,118 CD
9-11 CD
911 CD
91.21 CD
91-23 CD
9.125 CD
9.12 CD
91.2 CD
913-864-3982 CD
9.13 CD
913 CD
914-251-6200 CD
914 CD
9:15 CD
916.3 CD
9\/16 CD
91.7 CD
917 CD
918.4 CD
918 CD
9.192 CD
9.19 CD
919 CD
9.1 CD
91 CD
91-DAY JJ
92-14 CD
921.6 CD
92.2 CD
9,232 CD
923,500 CD
923 CD
92.42 CD
92.4 CD
9.25 CD
925 CD
926.1 CD
92.6 CD
926 CD
927,000 CD
9.275 CD
9.28 CD
9.29 CD
92.9 CD
9.2 CD
92 CD
92-DAY JJ
92%-OWNED JJ
93,000 CD
9:30-10 CD
930.2 CD
9:30 CD
930 CD
9:31 CD
9.31 CD
93.1 CD
931 CD
9.324 CD
9.32 CD
9\/32 CD
93.2 CD
932 CD
9.333 CD
9.33 CD
93.3 CD
933 CD
934,242 CD
934.7 CD
9.34 CD
9.35 CD
93.5 CD
9,360 CD
936 CD
9.375 CD
93.75 CD
9.37 CD
93.7 CD
937 CD
9:38 CD
93.8 CD
9.39 CD
93.9 CD
9.3 CD
93 CD
93-DAY JJ
940.6 CD
941-105 CD
942,000 CD
94,243 CD
9.42 CD
94.2 CD
942 CD
9.43 CD
94.3 CD
944,000 CD
94,425,000 CD
94.4 CD
944 CD
94.50 CD
94,543 CD
9:45 CD
9.45 CD
94.5 CD
94.625 CD
94.6 CD
946 CD
94.7 CD
9.482 CD
94.8 CD
949.3 CD
9.49 CD
94.9 CD
949 CD
9.4 CD
94 CD
9,500 CD
95.09 CD
9.50 CD
950 CD
95.11 CD
95,142 CD
9.51 CD
95.1 CD
951 CD
95.22 CD
95.25 CD
95.2 CD
95.33 CD
95-37 CD
953.8 CD
95.39 CD
9:53 CD
9.53 CD
95,400 CD
95.4 CD
955,000 CD
95.53 CD
95.57 CD
9.55 CD
95.6 CD
956 CD
95.72 CD
95.75 CD
95.7 CD
9.58 CD
95.8 CD
95.90 CD
959.3 CD
95.9 CD
9-5 CD
9.5 CD
95 CD
960,000 CD
9.60 CD
960 CD
96.15 CD
9.617 CD
961 CD
9.625 CD
9.62 CD
9.63 CD
963 CD
96.4 CD
9.65 CD
965 CD
966.471 CD
9.664 CD
966 CD
9.671 CD
967,809 CD
96.808 CD
9.68 CD
96.95 CD
9.69 CD
9-6 CD
9.6 CD
96 CD
9.70 CD
970 CD
971,000 CD
97-1 CD
97.25 CD
97.275 CD
97.2 CD
975,000 CD
9,756 CD
9.75 CD
975 CD
97.65 CD
9.76 CD
97.70 CD
97.74 CD
97.75 CD
9.77 CD
97.85 CD
9.78 CD
97.8 CD
97.9 CD
9.7 CD
97 CD
97-NATION JJ
9,800 CD
980.2 CD
9.80 CD
980 CD
981.2 CD
981.7 CD
9.81 CD
.9.82 CD
9.82 CD
98.30 CD
9.83 CD
98.3 CD
983 CD
98.481 CD
9.84 CD
98.518 CD
98.523 CD
9.85 CD
98.5 CD
98.625 CD
9.86 CD
98.6 CD
986 CD
98.6%-OWNED JJ
9.875 CD
9.87 CD
9.88 CD
98.8 CD
9.89 CD
989 CD
9-8 CD
9.8 CD
98 CD
98-POUND JJ
990,000 CD
99,000 CD
99-04 CD
990.79 CD
9.90 CD
99.14 CD
99.1875 CD
9.91 CD
99.1 CD
991 CD
992,000 CD
99.23 CD
992.7 CD
9.92 CD
992 CD
9.934 CD
99.35 CD
9.9375 CD
99,385 CD
99.3 CD
9.94 CD
99.555 CD
99.58 CD
9.95 CD
99.5 CD
99.60 CD
99.625 CD
99.64 CD
99.661 CD
99.672 CD
99.691 CD
99.75 CD
99.771 CD
99.775 CD
99.7 CD
99.80 CD
99.821 CD
99.85 CD
99.8 CD
99.90 CD
99.93 CD
99.943 CD
99.95 CD
9,999 CD
99.9 CD
999 CD
9.9 CD
99 CD
99-cent CD
99-CENT CD
9 CD
9. CD
A$ $
A-1 NN
A-2 NN
A310-300S NNP
A330-300s NNS
A330-300S NNS
A-6 NN
Aaa JJ
AAA JJ
AALSETH NNP
AA NN
AARON NNP
ABABA NNP
aback RB
ABACK RB
ABACUSES NNS
ABALKIN NNP
abandoned VBN VBD JJ
ABANDONED VBN VBD JJ
Abandoning VBG
ABANDONING VBG
ABANDONMENT NN
abandons VBZ
ABANDONS VBZ
abandon VB VBP
ABANDON VB VBP
ABA NNP
ABASHED JJ
abated VBN VBD
ABATED VBN VBD
ABATEMENT NN
abates VBZ
ABATES VBZ
abate VB
ABATE VB
ABATING VBG
ABBE NNP
ABBETT NNP
ABBEY NNP
ABBIE NNP
ABB NNP
ABBOT NNP
ABBOTT NNP
ABBOUD NNP
ABBY NNP
ABC NNP
ABC-TV NNP
abdicate VBP
ABDICATE VBP
abducted NN
ABDUCTED NN
ABDUCTION NN
ABELLO NNP
ABEL NNP
ABE NNP
ABERDEEN NNP
ABERRATION NN
abetted VBN
ABETTED VBN
ABETTING VBG
abide VB
ABIDE VB
ABIE NNP
ABILITIES NNS
ABILITY NN
ABITIBI-PRICE NNP
ABLE JJ NNP
ABM NNP
ABNEY NNP
AB NNP
abnormal JJ
ABNORMAL JJ
aboard IN RB
ABOARD IN RB
A-body JJ
A-BODY JJ
ABOFF NNP
abolished VBN VBD
ABOLISHED VBN VBD
ABOLISHING VBG
abolish VB
ABOLISH VB
ABOLITION NN
ABOMINABLE JJ
ABOMINATION NN
aborted JJ VBN
ABORTED JJ VBN
ABORTION-FUNDING JJ
ABORTIONIST NN
ABORTION NN
ABORTION NN NNP
Abortion NNP NN
ABORTION-RELATED JJ
Abortion-rights NNS
abortion-rights NNS JJ
ABORTION-RIGHTS NNS JJ
ABORTIONS NNS
ABORTIVE JJ
abounded VBD
ABOUNDED VBD
ABOUNDING VBG
abounds VBZ
ABOUNDS VBZ
abound VBP
ABOUND VBP
about-face NN
ABOUT-FACE NN
About IN RB
about IN RB RP JJ RBR
ABOUT IN RB RP JJ RBR
ABOVE-AVERAGE JJ
above IN JJ RB
ABOVE IN JJ RB NNP
Above IN NNP
ABOVE-MARKET JJ
ABOVE-NORMAL JJ
ABRAHAM NNP
ABRAHAMS NNP
ABRAMS NNP
ABRAMSON NNP
abrasive JJ NN
ABRASIVE JJ NN
ABRASIVES NNS
ABREAST NNP
ABRIDGING VBG
abroad RB
Abroad RB
ABROAD RB
abrupt JJ
Abrupt JJ
ABRUPT JJ
ABRUPTLY RB
Abscam-indicted JJ
ABSCAM-INDICTED JJ
ABSENCE NN
ABSENCES NNS
ABSENTEEISM NN
absent JJ VB
ABSENT JJ VB JJ|IN
Absent VB JJ|IN
absolute JJ
Absolute JJ
ABSOLUTE JJ
Absolutely RB
ABSOLUTELY RB
ABSOLUTISM NN
absolve VBP
ABSOLVE VBP
ABSOLVING VBG
Absorbed VBN
absorbed VBN VBD
ABSORBED VBN VBD
absorbent JJ
ABSORBENT JJ
ABSORBERS NNS
ABSORBING VBG
absorbs VBZ
ABSORBS VBZ
absorb VB VBP
ABSORB VB VBP
ABSORPTION NN
abstained VBD
ABSTAINED VBD
ABSTENTIONS NNS
ABSTINENCE NN
abstract JJ
ABSTRACT JJ
ABSTRACTS NNS
ABSURDITY NN
absurd JJ
ABSURD JJ
abundant JJ
ABUNDANT JJ
ABUNDANTLY RB
ABU NNP
abused VBN JJ VBD
ABUSED VBN JJ VBD
ABUSE NN
abuse NN VB
ABUSE NN VB
ABUSES NNS
ABUSING VBG
ABUSIVE JJ
abuzz JJ
ABUZZ JJ
Abyss NN
ABYSS NN
AC-130U NN
ACADEME NN
ACADEMIA NN
Academically RB
ACADEMICALLY RB
academic JJ NN
ACADEMIC JJ NNP NN
ACADEMICS NNS
ACADEMY NNP NN
ACADIA NNP
ACAPULCO NNP
acccounting NN
ACCCOUNTING NN
acceded VBD
ACCEDED VBD
accede VB
ACCEDE VB
ACCELERATED VBD JJ VBN
accelerated VBD VBN JJ
accelerates VBZ
ACCELERATES VBZ
accelerate VB VBP
ACCELERATE VB VBP
accelerating VBG JJ
ACCELERATING VBG JJ
ACCELERATION NN
ACCELERATOR NN
ACCENT NN
ACCENTS NNS
ACCEPTABLE JJ
ACCEPTANCE NNP NN
ACCEPTANCES NNS NNPS
Accepted JJ NNP
accepted VBD VBN JJ
ACCEPTED VBD VBN JJ NNP
ACCEPTING VBG
accepts VBZ
ACCEPTS VBZ
accept VB VBP
ACCEPT VB VBP
ACCESORY NN
ACCESSIBLE JJ
access NN VB
ACCESS NN VB
Accessories NNS NNP
ACCESSORIES NNS NNP
accessory JJ
ACCESSORY JJ
ACCIDENTALLY RB
ACCIDENT NN NNP
ACCIDENTS NNS
ACCLAIMED JJ
acclaim NN VB
ACCLAIM NN VB NNP
ACCOLADE NN
ACCOLADES NNS
accommodated VBN
ACCOMMODATED VBN
accommodate VB VBP
ACCOMMODATE VB VBP
ACCOMMODATING VBG
ACCOMMODATION NN
ACCOMMODATIONS NNS
ACCOMMODATIVE JJ
accomodate VB
ACCOMODATE VB
accompanied VBN VBD
ACCOMPANIED VBN VBD
accompanies VBZ
ACCOMPANIES VBZ
ACCOMPANIMENT NN
ACCOMPANIST NN
accompanying VBG JJ
ACCOMPANYING VBG JJ
accompany VB
ACCOMPANY VB
ACCOMPLI NN
accomplished VBN JJ
ACCOMPLISHED VBN JJ
accomplishes VBZ
ACCOMPLISHES VBZ
Accomplishing VBG
ACCOMPLISHING VBG
ACCOMPLISHMENT NN
ACCOMPLISHMENTS NNS
accomplish VB
ACCOMPLISH VB
ACCO NNP
ACCORDANCE NN
ACCORDED VBD VBN
accorded VBN VBD
Accordingly RB
ACCORDINGLY RB
According VBG
ACCORDING VBG
ACCORD NN NNP VB
accord NN VB
Accords NNPS NNP
ACCORDS NNS NNPS NNP
ACCOR NNP
ACCOUNTABILITY NN
ACCOUNTABLE JJ
ACCOUNTANT NN
Accountants NNPS
ACCOUNTANTS NNS NNPS
account-churning NN
ACCOUNT-CHURNING NN
accounted VBD VBN
ACCOUNTED VBD VBN
ACCOUNTING NN NNP VBG JJ
Accounting NNP NN
ACCOUNTING NNP NN
accounting NN VBG JJ
ACCOUNTING-RULES JJ
ACCOUNT NN NNP
account NN VBP VB
ACCOUNT NN VBP VB NNP
Accounts NNPS NNS
accounts NNS VBZ
ACCOUNTS NNS VBZ NNPS
accreted VBN
ACCRETED VBN
ACCRUAL NN
ACCRUALS NNS
Accrued VBN
accrued VBN JJ
ACCRUED VBN JJ
accrues VBZ
ACCRUES VBZ
accrue VB
ACCRUE VB
ACCRUING VBG
accumulated VBN
ACCUMULATED VBN
accumulate VBP
ACCUMULATE VBP
ACCUMULATING VBG
ACCUMULATION NN NNP
ACCURACY NN
accurate JJ
ACCURATE JJ
ACCURATELY RB
ACCUSATIONS NNS
accusatory JJ
ACCUSATORY JJ
accused VBN VBD
ACCUSED VBN VBD NNP
ACCUSER NN
ACCUSERS NNS
accuses VBZ
ACCUSES VBZ
accuse VBP VB
ACCUSE VBP VB
ACCUSING VBG
accustomed VBN JJ
ACCUSTOMED VBN JJ
ACE NN NNP
aces VBZ
ACES VBZ
ACETATE NN
ACETYLENE NN
ACHENBAUM NNP
ACHIEVABLE JJ
achieved VBN VBD
ACHIEVED VBN VBD
ACHIEVEMENT NN NNP
ACHIEVEMENTS NNS
achievement-test NN
ACHIEVEMENT-TEST NN
achieves VBZ
ACHIEVES VBZ
achieve VB VBP
ACHIEVE VB VBP
ACHIEVING VBG
ACHING VBG
acidified VBN
ACIDIFIED VBN
acid NN JJ
ACID NN JJ
acid-rain NN
ACID-RAIN NN
ACIDS NNS
ACKERMAN NNP
acknowledged VBD VBN JJ
ACKNOWLEDGED VBD VBN JJ
ACKNOWLEDGEMENT NN
acknowledges VBZ
ACKNOWLEDGES VBZ
acknowledge VBP VB
ACKNOWLEDGE VBP VB
ACKNOWLEDGING VBG
ACLU NNP
ACNE NN
A.C. NNP
ACORN NNP
ACORNS NNS
acquainted VBN
ACQUAINTED VBN
acquiesced VBD
ACQUIESCED VBD
acquiesce VB
ACQUIESCE VB
Acquired VBN
acquired VBN VBD JJ
ACQUIRED VBN VBD JJ
ACQUIRER NN
Acquirers NNS
ACQUIRERS NNS
acquires VBZ
ACQUIRES VBZ
acquire VB NN
ACQUIRE VB NN
ACQUIRING VBG
ACQUISITION-MINDED JJ
ACQUISITION NN NNP
Acquisitions NNS
ACQUISITIONS NNS
ACQUISITIVE JJ
ACQUISTION NN
ACQUITTAL NN
acquitted VBN
ACQUITTED VBN
acquit VB
ACQUIT VB
AC&R\/CCL NNP
ACRE NN
ACRES NNS NNP
ACRIMONIOUS JJ
ACRIMONY NN
AC&R NNP
ACRONYM NN
Across IN
across IN RP
ACROSS IN RP
across-the-board-cuts NNS
ACROSS-THE-BOARD-CUTS NNS
across-the-board JJ NN
ACROSS-THE-BOARD JJ NN
ACRYLIC NNP
acted VBD VBN
ACTED VBD VBN
Acting NN NNP VBG
acting VBG JJ NN
ACTING VBG JJ NN NNP
ACTIONABLE JJ
ACTION-ADVENTURE JJ
ACTION NN NNP
ACTIONS NNS
activated VBN
ACTIVATED VBN
activate VBP
ACTIVATE VBP
Active JJ
ACTIVE JJ
Actively RB
ACTIVELY RB
active-matrix JJ NN
ACTIVE-MATRIX NN JJ
ACTIVES NNS
ACTIVISM NN
activist NN JJ
ACTIVIST NN JJ
Activists NNS
ACTIVISTS NNS
Activities NNPS
ACTIVITIES NNS NNPS
Activity NN NNP
ACTIVITY NN NNP
Act NNP NN
ACT NNP NN VB VBP
act NN VB VBP
ACTON NNP
ACTOR NN
ACTORS NNS
actress NN
ACTRESS NN
acts NNS VBZ
ACTS NNS VBZ
actual JJ
Actual JJ
ACTUAL JJ
Actually RB
ACTUALLY RB
actuarial JJ
ACTUARIAL JJ
ACTUARIES NNS
actuary NN
ACTUARY NN
ACUPUNCTURIST NN
ACURA NNP
acute JJ
ACUTE JJ
ACUVUE NNP
ad-agency NN
AD-AGENCY NN
ADAGE NN
adamant JJ
ADAMANT JJ
ADAMANTLY RB
ADAMEC NNP
ADAM NNP
ADAMSKI NNP
ADAMS NNP
ADA NNP
ADAPTABLE JJ
ADAPTATION NN
Adapted VBN
adapted VBN VBD
ADAPTED VBN VBD
ADAPTER NN
ADAPTING NN VBG
adapting VBG NN
adapt VB VBP
ADAPT VB VBP
ADB NNP
Added VBD NNP VBN
added VBD VBN JJ
ADDED VBD VBN JJ NNP
addicted VBN JJ
ADDICTED VBN JJ
ADDICTION NN
addiction-treatment JJ NN
ADDICTION-TREATMENT JJ NN
ADDICTIVE JJ
ADDICT NN
ADDICTS NNS
ADDINGTON NNP
Adding VBG
ADDING VBG
ADDIS NNP
ADDISON NNP
ADDISS NNP
additional JJ
Additional JJ
ADDITIONAL JJ
Additionally RB
ADDITIONALLY RB
ADDITION NN
ADDITIONS NNS
ADDITIVES NNS
ADD-ON JJ
addressed VBN VBD
ADDRESSED VBN VBD
addresses NNS VBZ
ADDRESSES NNS VBZ
Addressing VBG
ADDRESSING VBG
address VB NN VBP
ADDRESS VB NN VBP
adds VBZ
Adds VBZ NNP
ADDS VBZ NNP
Add VB
add VB VBP
ADD VB VBP
ADELMAN NNP
ADEN NNP
ADENOCARD NN
adept JJ
ADEPT JJ
ADEPTS NNS
ADEQUACY NN
adequate JJ
ADEQUATE JJ
ADEQUATELY RB
AD-FREE JJ
adhered VBD
ADHERED VBD
adhere VB
ADHERE VB
adhesive NN JJ
ADHESIVE NN JJ
ADHESIVES NNS
AD-HOC JJ
ADIA NNP
ADI NNP
adjacent JJ
ADJACENT JJ
adjective NN
ADJECTIVE NN
adjoining JJ
ADJOINING JJ
adjourned VBN
ADJOURNED VBN
Adjournment NN
ADJOURNMENT NN
ADJUDICATOR NN
ADJUDICATORS NNS
ADJUSTABLE JJ
adjusted VBN JJ VBD
ADJUSTED VBN JJ VBD
ADJUSTER NN
Adjusters NNS
ADJUSTERS NNS
adjusting VBG NN
ADJUSTING VBG NN
ADJUSTMENT NN NNP
ADJUSTMENTS NNS
adjusts VBZ
ADJUSTS VBZ
Adjust VB
adjust VB VBP
ADJUST VB VBP
ADLAI NNP
ADLER NNP
ADLEY NNP
A.D.L. NNP
ADMAN NN
admen NNS
ADMEN NNS
administered VBN
ADMINISTERED VBN
administers VBZ
ADMINISTERS VBZ
administer VB
ADMINISTER VB
ADMINISTRATION-FED JJ
ADMINISTRATION NN NNP
Administration NNP NN
ADMINISTRATIONS NNS
ADMINISTRATIVE JJ
ADMINISTRATOR NN NNP
Administrators NNPS NNP
ADMINISTRATORS NNS NNPS NNP
ADMINSTRATION NN
ADMINSTRATIVE JJ
ADMIRABLE JJ
ADMIRABLY RB
ADMIRAL NN
ADMIRALTY NN
admired VBN VBD
ADMIRED VBN VBD
ADMIRER NN
Admirers NNS
ADMIRERS NNS
admires VBZ
ADMIRES VBZ
ADMISSIBLE JJ
ADMISSION NN
ADMISSIONS NNS
ADMISTRATION NNP
admits VBZ NNS
ADMITS VBZ NNS
Admittedly RB
ADMITTEDLY RB
ADMITTED VBD
ADMITTED VBD VBN
admitted VBN VBD
ADMITTING VBG
admit VB VBP
ADMIT VB VBP
ADM. NNP
ADMONISHING VBG
ADMONITION NN
ad NN FW
Ad NN NNP
AD NN NNP FW
ADN NNP
A-D NNP
A.D. NNP
ADOBE NNP
adolescent JJ NN
ADOLESCENT NN JJ
ADOLESCENTS NNS
ADOLPH NNP
ADOLPHUS NNP
ADO NN
ADOPTED VBD
adopted VBN VBD
ADOPTED VBN VBD
Adopting VBG
ADOPTING VBG
ADOPTION NN
ADOPTIVE JJ
adopts VBZ
ADOPTS VBZ
adopt VB VBP
ADOPT VB VBP
adorned VBD VBN
ADORNED VBD VBN
adorn VB
ADORN VB
ADRIAN NNP
adroit JJ
ADROIT JJ
ADROITLY RB
ADRs NNS NNPS
ADRS NNS NNPS
ADSI NNP
ADS NNPS NNS
Ads NNS
ADS NNS NNPS
AD-SUPPORTED JJ
ADT NNP
A DT NNP NN
A DT NNP SYM NN FW JJ LS IN
a DT SYM FW JJ LS NNP IN
adult NN JJ
ADULT NN JJ
Adults NNS
ADULTS NNS
Ad-Unit NN
AD-UNIT NN
advanced-ceramics NNS
ADVANCED-CERAMICS NNS
advanced-technology JJ NN
ADVANCED-TECHNOLOGY NN JJ
ADVANCED VBD JJ NNP VBN
advanced VBD JJ VBN
ADVANCEMENT NN NNP
ADVANCEMENTS NNS
ADVANCE NN VB JJ NNP VBP
advance NN VB JJ VBP
ADVANCE-PURCHASE JJ
ADVANCER NN
Advancers NNS
ADVANCERS NNS
Advances NNS
ADVANCES NNS
Advancing VBG
ADVANCING VBG
ADVANI NNP
advantage NN VB
ADVANTAGE NN VB
ADVANTAGEOUS JJ
ADVANTAGES NNS
ADVENT NN NNP
ADVENTURE NN
ADVENTURES NNS
ADVENTURISM NN
adversarial JJ
ADVERSARIAL JJ
ADVERSARIES NNS
adversary NN
ADVERSARY NN
adverse JJ
Adverse JJ
ADVERSE JJ
ADVERSELY RB
ADVERTISED VBD VBN JJ
advertised VBN VBD JJ
ADVERTISEMENT NN
ADVERTISEMENTS NNS
ADVERTISER NN NNP
Advertisers NNS NNPS NNP
ADVERTISERS NNS NNPS NNP
advertises VBZ
ADVERTISES VBZ
advertise VB VBP
ADVERTISE VB VBP
ADVERTISING-BACKED JJ
ADVERTISING NN NNP VBG VBG|NN
Advertising NNP NN VBG
advertising NN VBG VBG|NN
ADVERT NN
advertorial JJ
ADVERTORIAL JJ
ADVEST NNP
ADVICE NN NNP
ADVISABLE JJ
advised VBD VBN
ADVISED VBD VBN
ADVISER NN NNP
Advisers NNPS NNP
ADVISERS NNS NNPS NNP
advises VBZ
Advises VBZ
ADVISES VBZ
advise VB VBP
ADVISE VB VBP
advising VBG NN
ADVISING VBG NN
ADVISORIES NNS
ADVISOR NNP
Advisors NNP NNPS
ADVISORS NNP NNPS
advisory JJ NN
ADVISORY JJ NNP NN
ADVOCACY NN
advocated VBN VBD
ADVOCATED VBN VBD
advocate NN VBP VB
ADVOCATE NN VBP VB
Advocates NNS
advocates NNS VBZ
ADVOCATES NNS VBZ
ADVOCATING VBG
Aegis-class JJ
AEGIS-CLASS JJ
aegis NN
AEGIS NNP NN
AEG NNP
AEGON NNP
AEI NNP
A.E. NNP
A&E NNP
AEP NNP
aerial JJ
AERIAL JJ
AERMACCHI NNP
AER NNP
AEROBIC JJ
aerobics NN NNS
AEROBICS NN NNS
AERODYNAMIC JJ
Aeroflot NNP JJ
AEROFLOT NNP JJ
AEROJET NNP
AERONAUTICAL NNP
AERONAUTICS NNP
AEROQUIP NNP
aerospace NN JJ
AEROSPACE NN NNP JJ
Aerospace NNP NN
AEROSPACE-THOMSON NNP
AEROSPATIALE NNP
aesthetic JJ NN
AESTHETIC JJ NN
aeterna FW
AETERNA FW
Aetna NNP NN
AETNA NNP NN
AEW NNP
AFANASYEV NNP
AFFABLE JJ
AFFAIR NN NNP
Affairs NNP NNPS
AFFAIRS NNS NNP NNPS
affected VBN JJ VBD JJ|VBN
AFFECTED VBN JJ VBD JJ|VBN
AFFECTING VBG
affectionate JJ
AFFECTIONATE JJ
AFFECTIONS NNS
affects VBZ
AFFECTS VBZ
affect VB VBP NN
AFFECT VB VBP NN
AFFIDAVIT NN
AFFIDAVITS NNS
Affiliated NNP VBN
affiliated VBN JJ
AFFILIATED VBN JJ NNP
AFFILIATE NN
AFFILIATES NNS NNP
AFFILIATING VBG
AFFILIATION NN
AFFINITIES NNS
AFFINITY NN
AFFIRMATION NN
affirmative-action NN
AFFIRMATIVE-ACTION NN
AFFIRMATIVE JJ
affirmed VBD
AFFIRMED VBD
AFFIRMING VBG
afflicted VBN
AFFLICTED VBN
AFFLICTION NN
afflicts VBZ
AFFLICTS VBZ
afflict VB
AFFLICT VB
AFFLUENT JJ
affluent JJ NN
AFFLUENT JJ NN
AFFORDABILITY NN
AFFORDABLE JJ NNP
afforded VBN
AFFORDED VBN
afford VB VBP
AFFORD VB VBP
AFGHANISTAN NNP
AFGHANISTAN\/SOUTHWEST NNP
Afghan JJ NNP
AFGHAN JJ NNP
Afghans NNPS
AFGHANS NNPS
afield RB
AFIELD RB
AFIF NNP
afire RB
AFIRE RB
Aflatoxin NN
AFLATOXIN NN
AFL-CIO NNP
afloat RB
AFLOAT RB
AFNASJEV NNP
A.F. NNP
afoot RB
AFOOT RB
AFOREMENTIONED JJ
aforethought JJ
AFORETHOUGHT JJ
afraid JJ
AFRAID JJ
AFRICAINE NNP
AFRICAN-AMERICAN JJ
African-Americans NNPS
AFRICAN-AMERICANS NNPS
African-controlled JJ
AFRICAN-CONTROLLED JJ
AFRICANIST NNP
African JJ NNP
AFRICAN JJ NNP
AFRICA NNP
Africans NNPS
AFRICANS NNPS
AFRIKANERDOM NNP
Afrikaner JJ NNP
AFRIKANER JJ NNP
Afrikaners NNPS
AFRIKANERS NNPS
AFRIKA NNP
Aftereffects NNS
AFTEREFFECTS NNS
after-hours JJ NNS
AFTER-HOURS JJ NNS
after IN RB
After IN RB IN|JJ
AFTER IN RB IN|JJ
AFTERMATH NN
AFTERNOON NN
AFTERNOONS NNS
AFTERSHOCK-DAMPING JJ
AFTERSHOCK NN
AFTERSHOCK-RESISTANT JJ
Aftershocks NNS
AFTERSHOCKS NNS
AFTER-TAX JJ
aftertax JJ NN
AFTERTAX JJ NN
After-the-fact JJ
AFTER-THE-FACT JJ
afterward RB
Afterward RB
AFTERWARD RB
afterwards RB
Afterwards RB
AFTERWARDS RB
aft JJ
AFT JJ
again RB
Again RB NNP
AGAIN RB NNP
against IN
Against IN NNP
AGAINST IN NNP
AGA NNP
AGE-BIAS JJ
AGE-DISCRIMINATION JJ
aged VBN
AGED VBN
Agencies NNPS
AGENCIES NNS NNPS
AGENCY NN
AGENCY NN NNP
Agency NNP NN
Agenda NN NNP
AGENDA NN NNP
AGENDAS NNS
AGE NN NNP VBP
age NN VBP
AGENT NN NNP
Agents NNPS NNS
AGENTS NNS NNPS
Ages NNPS
AGES NNS NNPS
AGE-SPECIFIC JJ
AGFA NNP
AGF NNP
AGGIE NNP
aggravated VBN VBD
AGGRAVATED VBN VBD
aggravates VBZ
AGGRAVATES VBZ
aggravate VB VBP
AGGRAVATE VB VBP
aggravating JJ VBG
AGGRAVATING JJ VBG
aggregate JJ NN
AGGREGATE JJ NN
AGGREGATES NNS
AGGRESSIVE JJ
AGGRESSIVELY RB
aggressiveness NN
AGGRESSIVENESS NN
aghast JJ
AGHAST JJ
Agile FW
AGILE FW
AGILITY NN
aging VBG NN
AGING VBG NN
AGIN NNP
AGIP NNP
agitated VBN
AGITATED VBN
AGITATION NN
AGITATO NNP
AGNELLI NNP
Agnelli-related JJ
AGNELLI-RELATED JJ
Agnellis NNPS
AGNELLIS NNPS
AGNEW NNP
A.G. NNP
AG NNP
AGNOS NNP
AGOGLIA NNP
agonize VB
AGONIZE VB
agonizing JJ
AGONIZING JJ
ago RB IN
AGO RB IN
AGOURA NNP
AGRARIAN-REFORM JJ
AGREEABLE JJ
AGREED-ON JJ
AGREED-UPON JJ
Agreed VBD
AGREED VBD VBN JJ NN
agreed VBD VBN NN JJ
AGREEEMENT NN
AGREEING VBG
AGREEMENT NN NNP
Agreement NNP NN
AGREEMENTS NNS
agrees VBZ
AGREES VBZ
agree VBP VB
AGREE VBP VB
AGRESOURCE NNP
AGRICOLA NNP
AGRICOLE NNP
agricultural JJ
AGRICULTURAL JJ NNP
AGRICULTURE NNP NN
AGRIPRODUCTS NNS
agrochemical NN
AGROCHEMICAL NN
AGRO-INDUSTRY JJ
AGRO NNP
AGS NNP
AGUIRRE-SACASA NNP
AH-64 NN NNP
AH-64 NNP NN
ahead RB
AHEAD RB NNP
AHLERICH NNP
AHMAD NNP
AHMANSON NNP
A.H. NNP
AHOLD NNP
AHOY NNP
ahs UH
AHS UH
Ah UH
AH UH
Aichi NNP NNS
AICHI NNP NNS
AIDAN NNP
Aided VBN
aided VBN VBD
AIDED VBN VBD
AIDE NN
Aides NNS
AIDES NNS
AIDING VBG
Aid NNP NN
aid NN VB
AID NN VB NNP
AIDS-infected JJ
AIDS-INFECTED JJ
AIDS NNP NNS VBZ
aids NNS VBZ
AIDS-research JJ
AIDS-RESEARCH JJ
AIKEN NNP
aikido FW
AIKIDO FW
AIKMAN NNP
AILES NNP
ailing VBG JJ
AILING VBG JJ
AILMENT NN
AILMENTS NNS
AILS NNS
Aimed VBN
aimed VBN VBD
AIMED VBN VBD
AIMING VBG
AIMLESS JJ
AIMLESSLY RB
Aim NNP VB
aim NN VB VBP
AIM NN VB VBP NNP
Aims VBZ
aims VBZ NNS
AIMS VBZ NNS
AIN'T-IT-GREAT-TO-BE-A-TEXAN JJ
airborne JJ
AIRBORNE JJ NNP
airborne-radar NN
AIRBORNE-RADAR NN
AIRBUS NNP
air-cargo NN
AIR-CARGO NN
AIR-CHARTER JJ
AIR-CONDITIONED JJ
airconditioner JJR
AIRCONDITIONER JJR
air-conditioner NN
AIR-CONDITIONER NN
air-conditioning NN JJ
AIR-CONDITIONING NN JJ
aircraft-electronics NN
AIRCRAFT-ELECTRONICS NN
AIRCRAFT NN NNP NNS
aircraft NN NNS
aired VBD VBN
AIRED VBD VBN
AIRFARE NN
AIRFIELDS NNS
AIR-FREIGHT-FORWARDING JJ
Air-freight NN
air-freight NN JJ
AIR-FREIGHT NN JJ
airing VBG NN
AIRING VBG NN
air-interdiction NN
AIR-INTERDICTION NN
airlifted VBN
AIRLIFTED VBN
AIRLIFTING VBG
AIRLIFT NN
AIRLINE-ACQUISITION JJ
AIRLINE-INTERIOR JJ
AIRLINE-LANDING JJ
AIRLINE NN NNP
Airline NNP NN
AIRLINE-RELATED JJ
AIRLINERS NNS
Airlines NNPS NNP NNS
AIRLINES NNPS NNP NNS
airmen NNS
AIRMEN NNS
A.I.R. NNP
Air NNP NN
AIR NNP NN VB VBP
air NN VB VBP
air-passenger NN
AIR-PASSENGER NN
AIRPLANE NN
Airplanes NNPS
AIRPLANES NNS NNPS
air-pollution NN
AIR-POLLUTION NN
AIRPORT NN NNP
AIRPORTS NNS NNP
air-quality NN
AIR-QUALITY NN
Air-raid JJ
AIR-RAID JJ
air-separation NN
AIR-SEPARATION NN
airs NNS VBZ
AIRS VBZ NNS
AIRTIME NN
air-traffic NN
Air-traffic NN
AIR-TRAFFIC NN
AIRWAVES NNS
AIR-WAYBILL JJ
AIRWAY NN
Airways NNPS NNP
AIRWAYS NNPS NNP
airy JJ
AIRY JJ
AISLE NN
AISLES NNS
AITKEN NNP
AIT-LAOUSSINE NNP
ai VBP VBZ
AI VBP VBZ
AIWA NNP
AIW NNP
AJAX NNP
A.J.C. NNP
AJINOMOTO NNP
AJIT NNP
AK-47 NNP
a\/k\/a IN
A\/K\/A IN
a.k.a JJ
a.k.a. JJ
A.K.A JJ
A.K.A. JJ
AKE NNP
AKERFELDT NNP
AKERS NNP
AKERSON NNP
akin JJ
AKIN JJ
AKIO NNP
AKRON NNP
AKTIEBOLAGET NNP
AKZO NNP
ALABAMA NNP
ALADDIN NNP
ALAGOAS NNP
ALAMCO NNP
ALAMEDA NNP
ALAMO NNP
ALAMOS NNP
ALAN NNP
ALA NNP
ALA. NNP
ALARCON NNP
Alarmed JJ VBN
alarmed VBN JJ
ALARMED VBN JJ
alarming JJ VBG
ALARMING JJ VBG
ALARM NN
alarms NNS VBZ
ALARMS NNS VBZ
Alar NN NNP
ALAR NN NNP
Alaskan JJ
ALASKAN JJ
ALASKA NNP
alas UH
ALAS UH
ALBANESE NNP
ALBANIA NNP
Albanians NNS
ALBANIANS NNS
ALBANY NNP
albeit IN
ALBEIT IN
ALBERG NNP
ALBERTA NNP
ALBERT NNP
ALBERTO NNP
ALBERTVILLE NNP
ALBION NNP
ALBUM NN NNP
ALBUMS NNS
ALBUQUERQUE NNP
ALCAN NNP
ALCARRIA NNP
ALCATEL NNP
ALCATRAZ NNP
ALCEE NNP
ALCESTE NNP
AL-CHALABI NNP
ALCHEMISTS NNS
ALCOA NNP
ALCOHOLIC JJ
ALCOHOLICS NNS
ALCOHOLISM NN
ALCOHOL NN NNP
Alcohol NNP NN
ALDEN NNP
ALDERSON NNP
ALDOMET NNP
ALDRICH NNP
ALDRIDGE NNP
ALDUS NNP
ALEC NNP
ALE NN
alerted VBD
ALERTED VBD
ALERTING VBG
alerts VBZ
ALERTS VBZ
alert VB JJ NN
ALERT VB JJ NN NNP
ALEXANDER NNP
ALEXANDRA NNP
ALEXANDRIA NNP
Alexandrine JJ
ALEXANDRINE JJ
ALEX NNP
ALFALFA NN
ALF NNP
ALFONSE NNP
ALFRED NNP
ALFREDO NNP
alfresco RB
ALFRESCO RB
ALGERIAN NNP
ALGERIA NNP
ALGER NNP
ALGIERS NNP
ALGOM NNP
ALGONQUIN NNP
ALIBER NNP
ALICE NNP
ALICIA NNP
ALIDA NNP
alienated VBN
ALIENATED VBN
alienates VBZ
ALIENATES VBZ
alienate VB
ALIENATE VB
alienating VBG JJ
ALIENATING VBG JJ
alien JJ NN
ALIEN JJ NN
ALIENS NNS
aligned VBN
ALIGNED VBN
align VBP
ALIGN VBP
ALII NNP
alike RB
ALIKE RB
ALIMONY NN
ALI NNP
ALISARDA NNP
ALISKY NNP
ALISTAIR NNP
ALITO NNP
alive JJ RB
ALIVE JJ RB
ALJIAN NNP
ALLAN NNP
allayed VBN
ALLAYED VBN
allay VB
ALLAY VB
ALL-BLACK JJ
ALL-CASH JJ
ALL-DAY JJ
ALLDAY NNP
All DT PDT NNP RB
ALL DT PDT RB NNP RB|DT
all DT PDT RB RB|DT
ALLEGANY NNP
ALLEGATION NN
ALLEGATIONS NNS
ALLEGEDLY RB
alleged VBN JJ VBD
ALLEGED VBN JJ VBD
alleges VBZ NNS
ALLEGES VBZ NNS
allege VBP VB
ALLEGE VBP VB
ALLEGHANY NNP
ALLEGHENY NNP
ALLEGIANCE NN
ALLEGING VBG
ALLEGORY NN
ALLEGRO NNP
ALL-EMPLOYEE JJ
ALLENDALE NNP
ALLEN NNP
ALLENPORT NNP
ALLENTOWN NNP
ALLERGAN NNP
ALLERGIC JJ
ALLERGIES NNS
ALLERGY NN
alleviate VB
ALLEVIATE VB
ALLEVIATING VBG
ALLEY NNP NN
ALLEYS NNS
ALLGEDLY RB
ALLIANCE NN NNP
ALLIANCES NNS
ALLIANT NNP
ALLIANZ NNP
ALLIED-LYONS NNP
Allied NNP JJ
ALLIED NNP VBD JJ
ALLIED-SIGNAL NNP
allied VBD
Allies NNS
ALLIES NNS
ALLIGATOR NN
ALLIGATORS NNS
ALLIGOOD NNP
ALL-IMPORTANT JJ
all-in-all RB
ALL-IN-ALL RB
allnight JJ
ALL-NIGHT JJ
ALLNIGHT JJ
allocated VBN VBD
ALLOCATED VBN VBD
allocate VBP VB
ALLOCATE VB VBP
allocating VBG NN
ALLOCATING VBG NN
ALLOCATION NN
ALLOCATIONS NNS
ALLOCATOR NN
ALL-OPTIONS JJ
ALLOTMENT NN
ALLOTMENTS NNS
allout JJ
ALL-OUT JJ
ALLOUT JJ
ALLOWABLE JJ
ALLOWANCE NN
ALLOWANCES NNS
allowed VBN VBD JJ VB
ALLOWED VBN VBD VB JJ
Allowing VBG
ALLOWING VBG
allows VBZ
ALLOWS VBZ
Allow VB
allow VB VBP
ALLOW VB VBP
ALLOY NN
ALLOYS NNS
ALL-POWERFUL JJ
ALLRIGHTNIKS NNS
ALLSTATE NNP
ALL-STOCK JJ
ALLTEL NNP
ALL-TERRAIN JJ
ALL-TIME JJ
ALL-TOO-FAMILIAR JJ
ALL-TOO-SINCERE JJ
alluded VBD
ALLUDED VBD
ALLUMETTES NNP
ALLURE NN
alluring JJ
ALLURING JJ
ALLUSIONS NNS
alluvial JJ
ALLUVIAL JJ
ALLWASTE NNP
ALL-WHITE JJ
ALLYING VBG
ALLY NN
ally NN VB
ALLY NN VB
ALMADEN NNP
alma JJ
ALMA JJ
ALMANAC NN NNP
almost RB
Almost RB NNP
ALMOST RB NNP
A.L. NNP
AL NNP
ALOE NNP
Aloft JJ
aloft RB
ALOFT RB JJ
ALOHA NNP
alone RB JJ
ALONE RB JJ
Along IN RB
along IN RB RP RB|RP
ALONG IN RB RP RB|RP
alongside IN
Alongside IN RB
ALONGSIDE IN RB
ALONSO NNP
aloud RB
ALOUD RB
ALPA NNP
ALPER NNP
ALPHABET NN
ALPHA NNP NN
ALPHARETTA NNP
ALPHONSUS NNP
ALPINE NNP
ALPS NNP
ALQ-135 NN
ALQ-178 NNP
already RB
Already RB
ALREADY RB
ALREADY-RELUCTANT JJ
ALREADY-SHAKY JJ
ALREADY-SIZABLE JJ
ALREADY-STRAINED JJ
ALREADY-TENSE JJ
AL-SABAH NNP
AL-SEYASSAH NNP
ALSON NNP
also-ran NN
ALSO-RAN NN
also RB
Also RB
ALSO RB
ALSTHOM NNP
ALSTYNE NNP
ALTAIR NNP
ALTAMA NNP
ALTAR NN
altered VBN JJ VBD
ALTERED VBN VBD JJ
ALTERING VBG
alternate JJ
ALTERNATE JJ
alternates VBZ NNS
ALTERNATES VBZ NNS
ALTERNATING VBG
ALTERNATIVE-FUELED JJ
Alternatively RB
ALTERNATIVELY RB
alternative NN JJ
ALTERNATIVE NN JJ NNP
ALTERNATIVES NNS NNP
Alter NNP VB
alter VB VBP
ALTER VB VBP NNP
ALTHEA NNP
although IN
Although IN
ALTHOUGH IN
ALTIMARI NNP
ALTITUDE NN
ALTMAN NNP
altogether RB
Altogether RB
ALTOGETHER RB
ALTON NNP
ALTO NNP NN
ALTOS NNP
ALTRUISM NN
ALTRUISTIC JJ
ALUMINIUM NNP
ALUMINUM-HULLED JJ
aluminum-makers NNS
ALUMINUM-MAKERS NNS
aluminum NN JJ
ALUMINUM NN NNP JJ
Aluminum NNP NN
alumni NNS
ALUMNI NNS
alumnus NN
ALUMNUS NN
ALUN-JONES NNP
ALURRALDE NNP
ALUSUISSE NNP
ALVIN NNP
always RB
Always RB NNP
ALWAYS RB NNP
ALYCE NNP
ALYSIA NNP
ALZHEIMER NNP
a.m.-1:30 CD
A.M.-1:30 CD
AMADO NNP
AMADOU-MAHTAR NNP
AMAHS NNS
AMALGAMATED NNP
amalgamate VB
AMALGAMATE VB
AMALGAMATION NN
AMALGAMATIONS NNS
AMARAL NNP
AMARILLO NNP
amassed VBN VBD
AMASSED VBN VBD
amasses VBZ
AMASSES VBZ
amass VB VBP
AMASS VB VBP
amateurish JJ
AMATEURISH JJ
amateur JJ
Amateur JJ
AMATEUR JJ
AMATEURS NNS
AMAURY NNP
AMAX NNP
AMAZED JJ VBN
amazed VBN JJ
AMAZEMENT NN
amaze VB
AMAZE VB
amazing JJ
Amazing JJ NNP
AMAZING JJ NNP
AMAZINGLY RB
Amazonian JJ
AMAZONIAN JJ
AMAZONIA NNP
AMAZON NNP
AMBASE NNP
AMBASSADOR NN
AMBASSADOR NN NNP
Ambassador NNP NN
AMBASSADORS NNS
AMBER NNP
AMBIANCE NN
Ambiguan JJ
AMBIGUAN JJ
AMBIGUA NNP
AMBIGUITIES NNS
AMBIGUITY NN
AMBIGUOUS JJ
AMBITION NN
AMBITIONS NNS
AMBITIOUS JJ
AMBITIOUSLY RB
AMBIVALENCE NN
ambivalent JJ
AMBIVALENT JJ
AMBLER NNP
amble VB
AMBLE VB
AMBROSIANO NNP
AMBULANCE NN
ambulatory JJ
AMBULATORY JJ
ambushed VBD
AMBUSHED VBD
AMCAP NNP
AMCAST NNP
AMCORE NNP
AMDAHL NNP
AMDEC NNP
AMDURA NNP
AMENABLE JJ
amended VBN VBD
AMENDED VBN VBD
Amending VBG
AMENDING VBG
AMENDMENT NN NNP
AMENDMENTS NNS
amend VB
AMEND VB
Amenities NNS
AMENITIES NNS
A-men NNS
A-MEN NNS
Amen UH
AMEN UH
AMERADA NNP
Americana NNS NN
AMERICANA NNS NN
American-built JJ
AMERICAN-BUILT JJ
American-developed JJ
AMERICAN-DEVELOPED JJ
Americanized VBD
AMERICANIZED VBD
American-made JJ
AMERICAN-MADE JJ
American NNP JJ NN
AMERICAN NNP JJ NN
AMERICA NNP
Americans NNPS NNS NNP VBP
AMERICANS NNPS NNS NNP VBP
American-style JJ
AMERICAN-STYLE JJ
Americas NNPS NNP
AMERICAS NNPS NNP
AMERIGAS NNP
AMERITAS NNP
AMERITECH NNP
AMERMAN NNP
AMERON NNP
AMES NNP
AMEX NNP
AMFAC NNP
AMGEN NNP
AMHOWITZ NNP
AMIABLE JJ
AMICABLE NNP JJ
amid IN
Amid IN
AMID IN
AMIGA NNP
AMIN NNP
AMI NNP
amino JJ
AMINO JJ
AMIRA NNP
AMISH NNP
amiss JJ
AMISS JJ
AMITAI NNP
AMITYVILLE NNP
Amityvilles NNPS
AMITYVILLES NNPS
AMMANN NNP
AMMONIA NN
Ammonium NN
AMMONIUM NN
AMMO NN
AMMUNITION NN
AMNESTY NN
A&M NNP
Am NNP VBP
AM NNP VBP
a.m. NN RB
A.M. NN RB
AMOCO NNP
amok RB
AMOK RB
among IN
Among IN
AMONG IN
amongst IN
AMONGST IN
AMON NNP
Amor FW
AMOR FW
AMORTIZATION NN
amortize VB
AMORTIZE VB
AMOS NNP
amounted VBD VBN
AMOUNTED VBD VBN
AMOUNTING VBG
amount NN VB VBP
AMOUNT NN VB VBP
amounts NNS VBZ
AMOUNTS NNS VBZ
amours FW
AMOURS FW
AMPARANO NNP
AMPEREX NNP
AMPHOBILES NNS
ample JJ
AMPLE JJ
amplified VBN
AMPLIFIED VBN
AMPLIFIER NN
AMPLIFIERS NNS
AMPLIFYING VBG
amplify VB
AMPLIFY VB
AMPLY RB
AMPS NNS
AMPUTATION NN
AMRAM NNP
a.m RB NN
A.M RB NN
AMR NNP
AMRO NNP
AMSCHEL NNP
AMSTEL NNP
Amsterdam NNP NN
AMSTERDAM NNP NN
AMSTERDAM-ROTTERDAM NNP
AMSTRAD NNP
AMTECH NNP
AMT NNP
AMTRAK NNP
AMTRAN NNP
amused JJ VBN
AMUSED JJ VBN
AMUSEMENT NN
AMUSEMENTS NNS
amuse VBP
AMUSE VBP
amusing JJ
Amusing JJ
AMUSING JJ
AM VBP NNP RB
am VBP RB
AMVEST NNP
AMVISC NNP
AMWAY NNP
AMY NNP
An-12 NN
AN-12 NN
ANACHRONISM NN
ANACHRONISMS NNS
ANAC NNP
ANACOMP NNP
ANADARKO NNP
ANAHEIM NNP
ANAHEIM-SANTA NNP
ANALGESIC JJ
analog NN JJ
ANALOG NNP JJ NN
ANALOGOUS JJ
ANALOGY NN
Analyses NNS
ANALYSES NNS
analysis NN
ANALYSIS NN NNP
Analysis NNP NN
Analyst NN NNP
ANALYST NN NNP
Analysts NNS NNP
ANALYSTS NNS NNP
ANALYTICAL-INSTRUMENTS JJ
ANALYTICAL NNP JJ
ANALYTIC JJ NNP
analyzed VBD VBN
ANALYZED VBD VBN
analyze VB VBP
ANALYZE VB VBP
analyzing VBG NN
ANALYZING VBG NN
ANAMOR NNP
ANA NNP
ANARCHY NN
ANASTASIO NNP
ANATHEMA NN
ANATOL NNP
ANATOMICAL JJ
ANB NNP
ancestral JJ
ANCESTRAL JJ
ANCESTRY NN
ANCHORAGE NNP
anchored VBN
ANCHORED VBN
ANCHORMAN NN
ANCHOR NNP VBP VB NN
ANCHORS NNS
anchor VB NN VBP
ANCHORWOMAN NN
ancient JJ
ANCIENT JJ NNP
ANCILLARY JJ
ANC NNP
ANCTIL NNP
And CC
and CC JJ NN NNP IN VBP
AND CC JJ NNP NN VBP IN
AND CC NNP
Andean JJ
ANDEAN JJ
ANDERSEN NNP
ANDERSON NNP
ANDERSSON NNP
Andes NNPS
ANDES NNPS
and\/or CC
AND\/OR CC
ANDOVER NNP
ANDREA NNP
ANDREAS NNP
ANDREASSEN NNP
ANDREI NNP
ANDRE NNP
ANDREOTTI NNP
ANDREW NNP
ANDREWS NNP
ANDRZEJ NNP
an DT ,
AN DT
An DT NNP
AN DT , NNP
ANDY NNP
anecdotal JJ
ANECDOTAL JJ
ANEMIA NN
ANEMIAS NNS
ANEMIC JJ
ANEMICS NNS
ANESTHETIZED JJ
anew RB
ANEW RB
ANGEL\/EMI NNP
Angeles-based JJ
ANGELES-BASED JJ
ANGELES NNP
ANGELFISH NN
ANGELL NNP
ANGEL NNP
ANGELO NNP
Angels NNPS NNP
ANGELS NNPS NNP NNS
angered VBD VBN JJ
ANGERED VBD VBN JJ
ANGERING VBG
ANGER NN
ANGERS NNP
ANGIER NNP
ANGINA NN
ANGLE NN
ANGLES NNS
Anglian JJ
ANGLIAN JJ
ANGLIA NNP
ANGLICAN NNP
ANGLO-AMERICAN NNP
Anglo-Dutch NNP JJ
ANGLO-DUTCH NNP JJ
Anglo-French JJ
ANGLO-FRENCH JJ
ANGLO NNP
Angolan JJ
ANGOLAN JJ
ANGOLA NNP
ANGORA NN
ANGRILY RB
ANGRIST NNP
angry JJ
ANGRY JJ NNP
ANGST NN
ANGUISHED JJ
ANGUISH NN
ANHEUSER-BUSCH NNP
ANHEUSER NNP
ANIMAL-BASED JJ
animalcare JJ
ANIMALCARE JJ
animal-health NN
ANIMAL-HEALTH NN
animal NN JJ
ANIMAL NN JJ NNP
ANIMAL-RIGHTS JJ NN
animal-rights NN JJ
Animals NNS NNPS
ANIMALS NNS NNPS
Animated JJ
ANIMATED JJ VBN
animated VBN JJ
ANIMATION NN
ANIMOSITIES NNS
ANIMOSITY NN
ANISKOVICH NNP
ANITA NNP
ANKARA NNP
ANKLE NN
ANKLES NNS
ANKU NNP
ANNALEE NNP
annals NN
ANNALS NN
ANNA NNP
ANNAPOLIS NNP
ANNAUD NNP
ANNE-MARIE NNP
ANNENBERG NNP
Anne NNP VB
ANNE NNP VB
ANNEX NN NNP
ANNISTON NNP
ANNIVERSARIES NNS
anniversary NN
Anniversary NN
ANNIVERSARY NN
ANN NNP
ANNNOUNCEMENT NN
Announced JJ
ANNOUNCED VBD
announced VBD VBN JJ
ANNOUNCED VBD VBN JJ
Announcement NN
ANNOUNCEMENT NN
ANNOUNCEMENTS NNS
ANNOUNCER NN
announces VBZ
ANNOUNCES VBZ
announce VB VBP
ANNOUNCE VB VBP
ANNOUNCING VBG
ANNOYED JJ VBD VBN
annoyed VBD JJ VBN
annoying JJ
ANNOYING JJ
A. NNP NN JJ LS
annualized VBN JJ
Annualized VBN JJ
ANNUALIZED VBN JJ
annual JJ
Annual JJ NNP
ANNUAL JJ NNP
ANNUALLY RB
Annuities NNS
ANNUITIES NNS
ANNUITY NN NNP
ANNUM NN
Anointing VBG
ANOINTING VBG
ANOMALIES NNS
ANOMALOUS JJ
ANONYMITY NN
ANONYMOUS JJ
ANONYMOUSLY RB
Another DT
another DT NN
ANOTHER DT NN
ANSA NNP
ANSCO NNP
ANSWERABLE JJ
answered VBN VBD
ANSWERED VBN VBD
ANSWERING NN VBG
answering VBG NN
answer NN VB VBP
ANSWER NN VB VBP
Answers NNS
answers NNS VBZ
ANSWERS NNS VBZ
ANTACID NN
ANTAGONISTIC JJ
ANTAGONISTS NNS
antagonize VB
ANTAGONIZE VB
ANTARCTICA NNP
ANTAR NNP
ANTEATERS NNS
antebellum JJ
ANTEBELLUM JJ
ANTECEDENTS NNS
ANTELOPE NN NNS
antelope NNS NN
ANTE NN
ANTERIOR NNP
ANTHEM NN NNP
ANTHERS NNS
ANTHOLOGY NN
ANTHONG NNP
ANTHONY NNP
ANTHRAX NN
ANTHROPOLOGY NN NNP
anti-abortionist NN
ANTI-ABORTIONIST NN
anti-abortionists NNS
ANTI-ABORTIONISTS NNS
Anti-abortion JJ
anti-abortion JJ NN
ANTI-ABORTION JJ NN
ANTI-AIRCRAFT JJ
anti-airline NN
ANTI-AIRLINE NN
ANTI-AIRLINE-TAKEOVER JJ
ANTI-AMERICAN JJ
antianemia JJ
ANTIANEMIA JJ
anti-anemia NN
ANTI-ANEMIA NN
anti-apartheid JJ NN
ANTI-APARTHEID JJ NN
ANTI-BALLISTIC-MISSILE JJ
ANTI-BALLISTIC NNP
ANTI-BIKE JJ
antibiotic JJ NN
ANTIBIOTIC JJ NN
ANTIBODIES NNS
ANTIBODY NN
ANTI-BORK JJ
ANTI-CANCER JJ
ANTI-CHINA JJ
ANTI-CHOLESTEROL JJ
ANTI-CHRIST NNP
Anticipated JJ
anticipated VBN JJ VBD
ANTICIPATED VBN JJ VBD
anticipates VBZ
ANTICIPATES VBZ
anticipate VB VBP
ANTICIPATE VB VBP
Anticipating VBG
ANTICIPATING VBG
ANTICIPATION NN
ANTI-CLOTTING JJ
ANTI-COMMUNIST JJ
ANTI-COMPETITIVE JJ
ANTICOMPETITIVE JJ
ANTI-CRIME JJ
ANTICS NNS
ANTICULT NN
ANTI-DEBT JJ
ANTI-DEFENSE JJ
ANTI-DEFICIENCY NNP
anti-depressant NN
ANTI-DEPRESSANT NN
ANTI-DEVELOPMENT JJ
ANTI-DIARRHEAL JJ
ANTI-DISCRIMINATION JJ
ANTIDOTE NN
ANTI-DRUG JJ
ANTI-DUMPING JJ
ANTI-EUROPEAN JJ
ANTI-FLAG-BURNING JJ
anti-foreigner NN
ANTI-FOREIGNER NN
ANTI-FRAUD JJ
ANTIFREEZE NN
ANTI-GALILEO JJ
ANTIGEN NN
anti-government JJ NN
ANTI-GOVERNMENT NN JJ
anti-heroes NNS
ANTI-HEROES NNS
ANTIHERO NN
ANTIHISTAMINE NN
ANTI-HOMOSEXUAL JJ
ANTI-HOOLIGAN JJ
anti-infectives NNS
ANTI-INFECTIVES NNS
ANTI-INFLATION JJ
anti-intellectualism NN
ANTI-INTELLECTUALISM NN
ANTI-INTELLECTUAL JJ
ANTI-JAPANESE JJ
Anti-Jones JJ
ANTI-JONES JJ
Antilles NNPS
ANTILLES NNPS
ANTI-LOCK JJ
ANTI-MISCARRIAGE JJ
antimissile JJ
ANTI-MISSILE JJ
ANTIMISSILE JJ
ANTI-MONOPOLY JJ
ANTI-MORNING-SICKNESS JJ
ANTI-NAUSEA JJ
ANTI-NORIEGA JJ
ANTINORI NNP
Anti-nuclear JJ
ANTI-NUCLEAR JJ
anti-outsider NN
ANTI-OUTSIDER NN
ANTI-PARTY JJ
ANTIPATHIES NNS
ANTI-POCKETBOOK JJ
ANTI-PROFITEERING JJ
ANTI-PROGRAM JJ
anti-programmers NNS
ANTI-PROGRAMMERS NNS
ANTI-PROGRAM-TRADING JJ
ANTI-PROSTITUTION JJ
ANTIQUATED JJ
antique JJ NN
ANTIQUE JJ NN NNP
Antiques NNPS
ANTIQUES NNPS
ANTIQUITIES NNS
ANTI-RACKETEERING JJ
ANTIREALISTIC JJ
ANTI-RECESSION JJ
ANTI-REJECTION JJ
ANTI-SANDINISTA JJ
ANTI-SCIENCE JJ
ANTI-SCIENTIFIC JJ
Anti-Semitic JJ
ANTI-SEMITIC JJ
anti-Semitism NNP
ANTI-SEMITISM NNP
ANTI-SMOKING JJ
antisocial JJ
ANTI-SOCIAL JJ
ANTISOCIAL JJ
ANTI-SOMOZA JJ
antiSony JJ
ANTI-SONY JJ
ANTISONY JJ
ANTI-SOVIET JJ
ANTI-STALINIST JJ
anti-takeover JJ NN
ANTI-TAKEOVER JJ NN
ANTI-TAX JJ
ANTI-TAX-SHELTER JJ
ANTITHETICAL JJ
ANTI-TOXIC JJ
antitrust JJ
ANTITRUST JJ NNP
ANTITRUST-LAW JJ
Antitrust NNP JJ
ANTI-TURKISH JJ
ANTI-ULCER JJ
Anti-union JJ
ANTI-UNION JJ
ANTI-U.S. JJ
antiviral JJ
ANTI-VIRAL JJ
ANTIVIRAL JJ
ANTI-WAR JJ
ANTI-WAR-RELATED JJ
ANTI-WESTERN JJ
ANTI-WHITE JJ
ANT NN
ANTOINE NNP
ANTOLINI NNP
ANTONIA NNP
ANTONINI NNP
ANTONI NNP
ANTONIO NNP
ANTON NNP
ANTONOVICH NNP
ANTONY NNP
ANTORI NNP
ANTS NNS
antsy JJ
ANTSY JJ
ANTWERP NNP
ANTWERPSCHE NNP
ANXIETIES NNS
Anxiety NN
ANXIETY NN
Anxious JJ
ANXIOUS JJ
ANXIOUSLY RB
Anybody NN
ANYBODY NN
Any DT
any DT RB
ANY DT RB
anyhow RB
ANYHOW RB
anymore RB
ANYMORE RB
Anyone NN
ANYONE NN
anyplace RB
ANYPLACE RB
anything NN
Anything NN NNP
ANYTHING NN NNP
anytime RB
ANYTIME RB
anyway RB
Anyway RB
ANYWAY RB
anywhere RB
ANYWHERE RB
AOKI NNP
AON NNP
AOUN NNP
AOYAMA NNP
AP600 NN
APACHE NNP
APARENTLY RB
APARTHEID NN NNP
APARTMENT NN
APARTMENTS NNS
Apart RB
apart RB RP
APART RB RP
APATHETIC JJ
APATHY NN
AP-DOW NNP
APICELLA NNP
apiece RB JJ
APIECE RB JJ
aplenty JJ RB
APLENTY RB JJ
APLOMB NN
APMS NNP
A.P. NNP
A&P NNP
AP NNP
APOCALYPTIC JJ
APOGEE NNP
APOLLO NNP
APOLOGETICALLY RB
APOLOGIES NNS
APOLOGISTS NNS
apologized VBD
APOLOGIZED VBD
apologizes VBZ
APOLOGIZES VBZ
apologize VB
APOLOGIZE VB
APOLOGIZING VBG
APOLOGY NN
APPALACHIAN NNP
APPALACHIA NNP
Appalled JJ
appalled VBN
APPALLED VBN JJ
appalling JJ
APPALLING JJ
APPARAT NN
apparatus NN
APPARATUS NN
APPAREL NN NNP
Apparel NNP NN
apparent JJ
APPARENT JJ
Apparently RB
APPARENTLY RB
APPARITIONS NNS
appartus NN
APPARTUS NN
appealed VBD VBN
APPEALED VBD VBN
Appealing VBG
appealing VBG JJ
APPEALING VBG JJ
Appeal NN
appeal NN VB VBP
APPEAL NN VB VBP
appeals-court NN
APPEALS-COURT NN
Appeals NNPS NNP
APPEALS NNS NNP NNPS
APPEARANCE NN
APPEARANCES NNS
appeared VBD VBN
APPEARED VBD VBN
APPEARING VBG
APPEARS VBZ
appears VBZ NNS
APPEARS VBZ NNS
appear VB VBP
APPEAR VB VBP
appeased VBD
APPEASED VBD
appease VB
APPEASE VB
APPELBAUM NNP
appellate-court NN
APPELLATE-COURT NN
appellate JJ NN
APPELLATE JJ NNP NN
APPELL NNP
APPEL NNP
APPENDAGES NNS
appended VBN
APPENDED VBN
append VB
APPEND VB
APPERT NNP
APPETITE NN
APPETIZER NN
appetizing JJ
APPETIZING JJ
applauded VBD
APPLAUDED VBD
APPLAUDING VBG
applauds VBZ
APPLAUDS VBZ
applaud VBP VB
APPLAUD VB VBP
Applause NN
APPLAUSE NN
APPLEBAUM NNP
apple-industry NN
APPLE-INDUSTRY NN
applelike JJ
APPLELIKE JJ
APPLE NNP NN
apple-pie NN
APPLE-PIE NN
APPLESEED NNP
Appleseeds NNPS
APPLESEEDS NNPS
apples NNS JJ
APPLES NNS JJ
APPLEYARD NNP
appliance-controls NN
APPLIANCE-CONTROLS NN
APPLIANCE NN
APPLIANCES NNS
APPLICABILITY NN
APPLICABLE JJ
APPLICANT NN
APPLICANTS NNS
APPLICATION NN
Applications NNS
APPLICATIONS NNS
Applied NNP VBN
APPLIED VBN NNP VBD JJ
applied VBN VBD JJ
applies VBZ
APPLIES VBZ
Applying VBG
APPLYING VBG
apply VB VBP
APPLY VB VBP
Appointed VBN
appointed VBN VBD JJ
APPOINTED VBN VBD JJ
APPOINTEE NN
APPOINTEES NNS
APPOINTMENT NN
APPOINTMENTS NNS
appoint VB
APPOINT VB
APPRAISAL NN
APPRAISALS NNS
appraised VBN
APPRAISED VBN
APPRAISER NN
Appraisers NNPS
APPRAISERS NNS NNPS
appraise VB
APPRAISE VB
APPRECIABLE JJ
APPRECIABLY RB
appreciated VBN VBD
APPRECIATED VBN VBD
appreciates VBZ
APPRECIATES VBZ
appreciate VB VBP
APPRECIATE VB VBP
APPRECIATING VBG
APPRECIATION NN
APPREHENSION NN
APPREHENSIONS NNS
APPREHENSIVE JJ
apprised VBN
APPRISED VBN
approached VBN VBD
APPROACHED VBN VBD
approaches NNS VBZ
APPROACHES NNS VBZ
APPROACHING VBG
approach NN VBP VB
APPROACH NN VBP VB
appropriated VBN VBD
APPROPRIATED VBN VBD
appropriate JJ
APPROPRIATE JJ
APPROPRIATELY RB
appropriateness NN
APPROPRIATENESS NN
APPROPRIATION NN
Appropriations NNP NNPS NNS
APPROPRIATIONS NNS NNP NNPS
APPROPRIATORS NNS
APPROVAL NN
APPROVALS NNS
APPROVED VBD
approved VBD VBN JJ
APPROVED VBD VBN JJ
approves VBZ
APPROVES VBZ
approve VB VBP
APPROVE VB VBP
APPROVING VBG
approximate JJ
APPROXIMATE JJ
Approximately RB
APPROXIMATELY RB
approximates VBZ
APPROXIMATES VBZ
APRIL NNP
APRON NN
APTITUDE NNP
apt JJ
Apt JJ
APT JJ
APTLY RB
APV NNP
aqua JJ
AQUAMARINE NN
AQUA NNP
AQUARIUM NN
AQUINO NNP
AQUITAINE NNP
Arabian NNP JJ
ARABIAN NNP JJ
ARABIA NNP
ARABIC NNP
Arab-Israeli JJ
ARAB-ISRAELI JJ
Arab JJ NNP
ARAB JJ NNP
ARABLE JJ
Arabs NNPS NNS
ARABS NNPS NNS
Arab-sponsored JJ
ARAB-SPONSORED JJ
ARAFAT NNP
ARAI NNP
ARAMID NN
ARAN NNP
ARA NNP
ARANSAS NNP
ARASKOG NNP
ARBEL NNP
Arbitrage NN
ARBITRAGE NN
Arbitrage-related JJ
ARBITRAGE-RELATED JJ
ARBITRAGER NN
Arbitragers NNS
ARBITRAGERS NNS
ARBITRAGEURS NNS
Arbitraging VBG
ARBITRAGING VBG
ARBITRARILY RB
ARBITRARY JJ
arbitrates VBZ
ARBITRATES VBZ
ARBITRATING VBG
ARBITRATION NN
ARBITRATOR NN
ARB NN
ARBORETUM NNP
ARBORISTS NNS
ARBOR NNP
Arbs NNS
ARBS NNS
Arby NNP NN
ARBY NNP NN
ARCADES NNS
ARCADIAN NNP
arcane JJ
ARCANE JJ
ARCATA NNP
ARCHAEOLOGICAL JJ
ARCHAIC JJ
arched JJ VBD
ARCHED JJ VBD
ARCHER-DANIELS-MIDLAND NNP
ARCHER NNP
ARCHEY NNP
ARCHIBALD NNP
ARCHIPELAGO NNP
ARCHITECT NN
Architects NNPS NNS
ARCHITECTS NNS NNPS
architectural JJ
ARCHITECTURAL JJ
ARCHITECTURALLY RB
ARCHITECTURE NN NNP
archival JJ
ARCHIVAL JJ
archive NN
ARCHIVE NNP NN
Archives NNPS
ARCHIVES NNPS
archness NN
ARCHNESS NN
ARCH-RIVAL JJ
archrival JJ NN
ARCHRIVAL JJ NN
ARCHULETA NNP
arch VBP NN
ARCH VBP NN NNP
ARC NNP
ARCO NNP
ARCTIC NNP
ARDEN NNP
ardent JJ
ARDENT JJ NNP
ARDENTLY RB
ARDITO NNP
ARDMORE NNP
ARDOR NN
AREA-CODE JJ
AREA NN
AREA NN NNP
Area NNP NN
Areas NNS
AREAS NNS
ARENA NN NNP
ARENAS NNS
ARENS NNP
ARE VBP
are VBP NN IN NNP
Are VBP NNP
ARE VBP NNP NN IN
ARFEEN NNP
Argentina NNP NN
ARGENTINA NNP NN
Argentine JJ
ARGENTINE JJ
Argentinian JJ
ARGENTINIAN JJ
ARGONNE NNP
ArgoSystems NNPS
ARGOSYSTEMS NNPS
Arguably RB
ARGUABLY RB
argued VBD VBN
ARGUED VBD VBN
argues VBZ
ARGUES VBZ
argue VBP VB
ARGUE VBP VB
Arguing VBG
ARGUING VBG
ARGUMENT NN
ARGUMENTS NNS
ARGUMENTY NNP
ARGUS NNP
ARGYLL NNP
ARIAIL NNP
ARIANE NNP
ARIA NN
ARIAS NNP
ARIEL NNP
ARIGHI NNP
arisen VBN
ARISEN VBN
arises VBZ
ARISES VBZ
ARISE VBP
arise VB VBP
ARISE VB VBP
ARISING VBG
ARISTECH NNP
ARISTOCRACY NN
ARISTOCRATIC JJ
arithmetic NN
ARITHMETIC NN
Ariz.-based JJ
ARIZ.-BASED JJ
ARIZ NNP
ARIZ. NNP
ARIZONA NNP
Arizona-related JJ
ARIZONA-RELATED JJ
Arkansas-based JJ
ARKANSAS-BASED JJ
Arkansas NNP NNS
ARKANSAS NNP NNS
Arkla NNP NN
ARKLA NNP NN
ARK NNP
ARK. NNP
ARKOMA NNP
ARLEIGH NNP
ARLEN NNP
Arles NN
ARLES NN
ARLINGTON NNP
ARMADILLOS NNS
Armageddon NN
ARMAGEDDON NN
ARMCO NNP
Armed NNP VBN
armed VBN JJ
ARMED VBN JJ NNP
Armenian JJ
ARMENIAN JJ
ARMENIA NNP
Armenians NNPS
ARMENIANS NNPS
ARMEN NNP
ARMIES NNS
arming NN
ARMING NN
Arm NN
arm NN VB
ARM NN VB
ARMONK NNP
ARMORED JJ NNP
ARMORED-VEHICLE JJ
ARMOR NN
ARMORY NN
ARMPITS NNS
arms-control NN JJ
ARMS-CONTROL NN JJ
arms-kickback NN
ARMS-KICKBACK NN
Arms NNS
ARMS NNS
ARMS-REDUCTION JJ
ARMSTRONG NNP
ARMUELLES NNP
Army NNP NN
ARMY NNP NN
ARNEY NNP
ARNOLD NNP
ARNOTT NNP
AROMA NN
AROMAS NNS
AROMATIQUES NNP
ARONSON NNP
arose VBD
AROSE VBD
Around IN
around IN RB RP RB|RP
AROUND IN RB RP RB|RP
AROUND-THE-CLOCK JJ
aroused VBN VBD
AROUSED VBN VBD
arouses VBZ
AROUSES VBZ
arouse VB
AROUSE VB
AROUSING VBG
ARPANET NNP
ARPEGGIOS NNS
ARPINO NNP
ARPS NNP
Arraignments NNS
ARRAIGNMENTS NNS
arranged VBD VBN
ARRANGED VBD VBN
ARRANGEMENT NN
Arrangements NNS
ARRANGEMENTS NNS
arranges VBZ
ARRANGES VBZ
arrange VB
ARRANGE VB
ARRANGING VBG
ARRAY NN
ARREARS NNS
Arrested VBN
arrested VBN VBD
ARRESTED VBN VBD
Arrest NN
arrest NN VB
ARREST NN VB
ARRESTS NNS
ARRINGTON NNP
ARRIVAL NN
ARRIVALS NNS
ARRIVED VBD
arrived VBD VBN
ARRIVED VBD VBN
arrives VBZ
ARRIVES VBZ
arrive VB VBP
ARRIVE VB VBP
ARRIVING VBG
ARROGANCE NN
arrogant JJ
ARROGANT JJ
ARROW NNP NN
ARROWS NNS
ARROYO NNP
ARSENAL NN
ARSENALS NNS
ARSENEAULT NNP
arsenic NN
ARSENIC NN
ARSENIDE NN
ARSENIO NNP
ARSONIST NN
ARSON NN
ART-ACQUISITION JJ
art-auction NN
ART-AUCTION NN
ART-DEALING JJ
Arteries NN
ARTERIES NNS NN
artery-clogging NN
ARTERY-CLOGGING NN
ARTERY NN
ARTFUL JJ
ARTHRITIC JJ
arthritis NN
ARTHRITIS NN NNP
Arthurian JJ
ARTHURIAN JJ
ARTHUR NNP
ARTICLE NN
ARTICLE NN NNP
Article NNP NN
Articles NNPS
ARTICLES NNS NNPS
articulate VB
ARTICULATE VB
ARTIFACT NN
ARTIFACTS NNS
ARTIFICAL JJ
artificial JJ NN
ARTIFICIAL JJ NN
ARTIFICIALLY RB
ARTILLERISTS NNS
ARTILLERY NN
ARTISTIC JJ
ARTIST NN NNP
Artist NNP NN
ARTISTRY NN
Artists NNP NNS
ARTISTS NNS NNP
ART NN NNP
Art NNP NN
ART-NOUVEAU JJ
ARTOIS NNP
ARTRA NNP
Arts NNP NNPS NNS
ARTS NNS NNP NNPS
artsy JJ
ARTSY JJ
ARTWORK NN
ARTWORKS NNS
art-world NN
ART-WORLD NN
ARTY NNP
ARTZT NNP
ARUBA NNP
ARVIND NNP
AS\/400 NN
ASADA NNP
Asahi NNP NNS
ASAHI NNP NNS
ASA NNP
ASARCO NNP
asbestos-abatement NN
ASBESTOS-ABATEMENT NN
asbestos-disease NN
ASBESTOS-DISEASE NN
asbestosis NN
ASBESTOSIS NN
asbestos NN
Asbestos NN
ASBESTOS NN
ASBESTOS-RELATED JJ
ASBURY NNP
ASCAP NNP
ASCENDENCY NN
ASCENDING VBG
ASCENT NN
ascertain VB
ASCERTAIN VB
ASCII NNP
ascribed VBN
ASCRIBED VBN
ascribe VBP
ASCRIBE VBP
ASDA NNP
ASEAN NNP
ASEA NNP
ASENSIO NNP
ASEPTICALLY RB
ASHAMED JJ
ASHER\/GOULD NNP
ASHER NNP
ASHES NNS
ASHEVILLE NNP
Ashland NNP VBP
ASHLAND NNP VBP
ASH NNP
ASHOK NNP
ashore RB
ASHORE RB
ASHTABULA NN NNP
Ashtabula NNP NN
ASHTON-TATE NNP
ASHTRAYS NNS
ASHURST NNP
ASHWOOD NNP
Asia\/Australia JJ
ASIA\/AUSTRALIA JJ
Asian JJ NNP
ASIAN JJ NNP
Asia NNP NN
ASIA NNP NN
Asians NNPS
ASIANS NNPS
Asia-Pacific NNP JJ
ASIA-PACIFIC NNP JJ
Aside RB
aside RB RP
ASIDE RB RP
ASIL NNP
ASILONE NNP
As IN RB
as IN RB JJ
AS IN RB NNP JJ
ASKA NNP
asked VBD VBN JJ
ASKED VBD VBN JJ
Asked VBN VBD
asking VBG NN JJ
ASKING VBG NN JJ
ASKIN NNP
ASKO NNP
asks VBZ
ASKS VBZ
Ask VB
ask VB VBP
ASK VB VBP
ASLACTON NNP
ASLANIAN NNP
ASLEEP JJ RB
asleep RB JJ
ASMAN NNP
ASMARA NNP
A.S. NNP
A'S NNP
A\/S NNP
AS NNP IN
ASPECT NN
ASPECTS NNS
ASPEN NNP
ASPENS NNS
ASPERSION NN
ASPERSIONS NNS
ASPHALT NN
ASPIN NNP
ASPIRATIONS NNS
aspired VBD
ASPIRED VBD
aspires VBZ
ASPIRES VBZ
aspire VBP
ASPIRE VBP
aspiring JJ VBG
ASPIRING JJ VBG
ASPIRIN NN
ASQUITH NNP
ASSAB NNP
ASSAD NNP
ASSAILANT NN
assailed VBD VBN
ASSAILED VBD VBN
assassinated VBD VBN
ASSASSINATED VBD VBN
assassinate VB
ASSASSINATE VB
ASSASSINATING VBG
ASSASSINATION NN
ASSASSINATIONS NNS
ASSASSIN NN
assault NN VBP
ASSAULT NN VBP
ASSAULTS NNS
ASSAULT-WEAPONS JJ
ASSEET NN
ASSEMBLAGES NNS
assembled VBN VBD
ASSEMBLED VBN VBD
assemble VB VBP
ASSEMBLE VB VBP
ASSEMBLIES NNS
ASSEMBLING VBG
assembly-line NN
ASSEMBLY-LINE NN
ASSEMBLYMAN NNP
assembly NN
ASSEMBLY NN NNP
Assembly NNP NN
ASSENT NN
asserted VBD VBN
ASSERTED VBD VBN
ASSERTING VBG
ASSERTION NN
ASSERTIONS NNS
ASSERTIVE JJ
asserts VBZ
ASSERTS VBZ
assert VB VBP
ASSERT VB VBP
ASSES NNS
assessed VBN VBD
ASSESSED VBN VBD
ASSESSING VBG
ASSESSMENT NN NNP
ASSESSMENTS NNS
assess VB VBP
ASSESS VB VBP
ASSET-ALLOCATION JJ
Asset-backed JJ
ASSET-BACKED JJ NNP
Asset-Backed NNP JJ
asset-forfeiture NN
ASSET-FORFEITURE NN
ASSET-LIABILITY JJ
Asset-management JJ
asset-management NN
ASSET-MANAGEMENT NN JJ
ASSET NN NNP
ASSET-QUALITY JJ
ASSET-SALE JJ
ASSETS NNP NNPS NNS
Assets NNS NNPS
ASSETS NNS NNPS NNP
ASSET-STRIPPING JJ
asset-valuation NN
ASSET-VALUATION NN
ASSICURAZIONI NNP
ASSIDUOUSLY RB
assigned VBN JJ
ASSIGNED VBN JJ
ASSIGNMENT NN
ASSIGNMENTS NNS
assigns VBZ
ASSIGNS VBZ
assign VB VBP
ASSIGN VB VBP
ASSIMILATED JJ
assimilate VB
ASSIMILATE VB
ASSISTANCE NN
assistant NN JJ
ASSISTANT NN JJ NNP
ASSISTANTS NNS
ASSISTED-LIVING JJ
assisted VBN
ASSISTED VBN
ASSISTING VBG
assists VBZ
ASSISTS VBZ
assist VB VBP
ASSIST VB VBP
associated VBN JJ
ASSOCIATED VBN NNP JJ
Associate JJ NNP
associate JJ NN VBP
ASSOCIATE JJ NN VBP NNP
ASSOCIATES NNPS NNP
Associates NNPS NNP NNS
ASSOCIATES NNPS NNS NNP
ASSOCIATING VBG
ASSOCIATION-COLLEGE NNP
Association NNP NN
ASSOCIATION NNP NN
ASSOCIATIONS NNS
ASSORTED JJ
ASSORTMENT NN
assuage VB
ASSUAGE VB
assumed VBD VBN JJ
ASSUMED VBD VBN JJ
assumes VBZ
ASSUMES VBZ
Assume VB
assume VB VBP
ASSUME VB VBP
Assuming VBG
ASSUMING VBG
ASSUMPTION NN
ASSUMPTIONS NNS
ASSURANCE NN NNP
Assurances NNP NNPS
ASSURANCES NNS NNP NNPS
assured VBN VBD JJ
ASSURED VBN VBD JJ
assures VBZ
ASSURES VBZ
assure VB
ASSURE VB
ASSURING VBG
ASTEC NNP
ASTEROIDS NNS
ASTHMA NN
AST NNP
astonishing JJ
ASTONISHING JJ
ASTONISHMENT NN
ASTORIA NNP
ASTOR NNP
ASTOUNDED JJ
astounding JJ
ASTOUNDING JJ
astounds VBZ
ASTOUNDS VBZ
astray RB
ASTRAY RB
astride IN
ASTRIDE IN
ASTRINGENCY NN
ASTRONAUTS NNS
ASTRONOMER NN
ASTRONOMICAL JJ
ASTRONOMY NNP
ASTROPHYSICIST NN
astute JJ
ASTUTE JJ
asunder RB
ASUNDER RB
ASWARA NNP
as-yet RB
AS-YET RB
ASYLUM NN
ATARI NNP
at-bat NN
AT-BAT NN
A.T.B. NNP
ATCHINSON NNP
ATCO NNP
ATELIERS NNP
ate VBD
Ate VBD
ATE VBD
ATHEIST NN
ATHENA NNP
Athenian JJ
ATHENIAN JJ
ATHENS NNP
ATHERTON NNP
ATHLETE NN
ATHLETE-PAYOFF JJ
athlete-s NN
ATHLETE-S NN
ATHLETES NNS
athlete-student NN
ATHLETE-STUDENT NN
ATHLETIC JJ
athletic-shoe NN
ATHLETIC-SHOE NN
ATHLETICS NNS NNP
ATHLONE NNP
At IN
at IN RP NN
AT IN RP NN NNP
ATKINS NNP
ATKINSON NNP
Atlanta-based JJ
ATLANTA-BASED JJ
ATLANTA NNP
Atlantans NNPS
ATLANTANS NNPS
Atlantic NNP JJ
ATLANTIC NNP JJ
Atlantis NNP NNS
ATLANTIS NNP NNS
AT-LARGE JJ
Atlas NNP NN
ATLAS NNP NN
AT-MARKET JJ
ATMOSPHERE NN
ATMOSPHERIC JJ
AT*/NNP&T NN
ATOLLS NNS
ATOMIC JJ
ATOMS NNS
atonal JJ
ATONAL JJ
Atone VB
ATONE VB
atop IN
Atop IN
ATOP IN
ATORINO NNP
ATRIUM NN NNP
ATROCIOUS JJ
ATROCITIES NNS
ATROCITY NN
atrun JJ
ATRUN JJ
ATS\/2 NNP
ATSUSHI NNP
attached VBN VBD JJ
ATTACHED VBN VBD JJ
ATTACHE NN
attaches VBZ
ATTACHES VBZ
ATTACHING VBG
ATTACHMENT NN
attach VB VBP
ATTACH VB VBP
attacked VBN VBD
ATTACKED VBN VBD
ATTACKER NN
ATTACKERS NNS
attacking VBG NN
ATTACKING VBG NN
ATTACK NN VB NNP VBP
attack NN VB VBP
Attacks NNS
attacks NNS VBZ
ATTACKS NNS VBZ
ATTAINABLE JJ
attained VBN
ATTAINED VBN
attain VB
ATTAIN VB
ATTARCKS NNS
attempted VBD VBN JJ
ATTEMPTED VBD VBN JJ
ATTEMPTING VBG
attempt NN VB VBP
ATTEMPT NN VB VBP
Attempts NNS
attempts NNS VBZ
ATTEMPTS NNS VBZ
ATTENDANCE NN
attendant NN JJ
ATTENDANT NN JJ
Attendants NNPS NNS
ATTENDANTS NNS NNPS
attended VBD VBN
ATTENDED VBD VBN
ATTENDEE NN
ATTENDEES NNS
ATTENDING VBG
attends VBZ
ATTENDS VBZ
attend VB VBP
ATTEND VB VBP
Attention NN VB
ATTENTION NN VB
attests VBZ
ATTESTS VBZ
attest VB
ATTEST VB
Attic JJ
ATTIC JJ NN
attic NN
ATTICS NNS
ATTITUDE NN
Attitudes NNS
ATTITUDES NNS
AT&T NNP NN
ATTORNEY-CLIENT JJ
attorney-consultant NN
ATTORNEY-CONSULTANT NN
ATTORNEY-DISCIPLINARY JJ
ATTORNEY NN NNP
Attorneys NNS NNP
ATTORNEYS NNS NNP
attracted VBD VBN
ATTRACTED VBD VBN
Attracted VBN
ATTRACTING VBG
ATTRACTION NN
ATTRACTIONS NNS
ATTRACTIVE JJ
ATTRACTIVELY RB
attractiveness NN
ATTRACTIVENESS NN
attracts VBZ
ATTRACTS VBZ
attract VB VBP
ATTRACT VB VBP
ATTRIBUTABLE JJ
attributed VBD VBN
ATTRIBUTED VBD VBN
attributes VBZ NNS
ATTRIBUTES VBZ NNS
attribute VBP NN VB
ATTRIBUTE VBP NN VB
ATTRIBUTING VBG
ATTRIDGE NNP
ATTRITION NN
AT&T-sponsored JJ
AT&T-SPONSORED JJ
ATTUNED JJ
ATTWOOD NNP
ATWELL NNP
ATWOOD NNP
AUBREY NNP
AUCOIN NNP
auctioned VBN VBD
AUCTIONED VBN VBD
AUCTIONEER NN
AUCTION-FEE JJ
auction-house NN
AUCTION-HOUSE NN
auction NN VB
AUCTION NN VB
Auctions NNS NNPS
AUCTIONS NNS NNPS
AUDACIOUS JJ
AUDACITY NN
AUDIBLE JJ
AUDIENCE-FRIENDLY JJ
AUDIENCE NN
AUDIENCES NNS
AUDI NNP
AUDIOCASSETTES NNS
audio JJ NN
AUDIO JJ NN
AUDIOPHILES NNS
audio-specialty NN
AUDIO-SPECIALTY NN
AUDIO-VISUAL JJ
AUDIOVISUAL NNP
AUDITED VBD JJ VBN
audited VBN JJ VBD
AUDITING NN VBG
auditing VBG NN
audition VB NN
AUDITION VB NN
AUDIT NN NNP VB
audit NN VB
auditor-general NN
AUDITOR-GENERAL NN
AUDITORIUM NNP
AUDITOR NN
Auditors NNS
AUDITORS NNS
audits NN NNS
AUDITS NN NNS
AUDITS NNS
AUDREY NNP
AUDUBON NNP
Au FW NNP
AU FW NNP
augment VB
AUGMENT VB
AUG. NNP
AUGUSTA NNP
Augustines NNPS
AUGUSTINES NNPS
august JJ
AUGUST NNP JJ
AUNT NN NNP
aural JJ
AURAL JJ
AURA NN
aureus NN
AUREUS NN
AURORA NNP
AUSCHWITZ NNP
AUS NNP
AUSPICES NNS
AUSPICIOUS JJ
AUSSEDAT NNP
austere JJ
AUSTERE JJ
AUSTERITY NN
AUSTIN NNP
Australia-based JJ
AUSTRALIA-BASED JJ
Australian-American JJ
AUSTRALIAN-AMERICAN JJ
Australian JJ NNP
AUSTRALIAN JJ NNP
AUSTRALIA NNP
Australians NNPS
AUSTRALIANS NNPS
Austrian JJ NNP
AUSTRIAN JJ NNP
AUSTRIA NNP
AUTHENTICITY NN
AUTHENTIC JJ
authored VBN
AUTHORED VBN
authoritarian JJ
AUTHORITARIAN JJ
AUTHORITATIVE JJ
Authorities NNS NNP
AUTHORITIES NNS NNP
AUTHORITY NN NNP
AUTHORIZATION NN
AUTHORIZATIONS NNS
authorized VBD VBN JJ
AUTHORIZED VBD VBN JJ
authorizes VBZ
AUTHORIZES VBZ
authorize VB
AUTHORIZE VB
AUTHORIZING VBG
Author NN
AUTHOR NN
AUTHORSHIP NN
AUTHORS NNS
AUTIONS NNS
AUTOBIOGRAPHICAL JJ
AUTOBIOGRAPHY NN
auto-buying NN
AUTO-BUYING NN
AUTOCRATIC JJ
AUTOCRAT NN
auto-dealer NN
AUTO-DEALER NN
AUTODESK NNP
auto-emission NN
AUTO-EMISSION NN
auto-emissions NNS
AUTO-EMISSIONS NNS
autographed VBN JJ
AUTOGRAPHED VBN JJ
autograph NN VB
AUTOGRAPH NN VB
AUTOGRAPHS NNS
AUTO\/HOMEOWNERS NNS
autoimmune JJ
AUTOIMMUNE JJ
auto-industry NN
AUTO-INDUSTRY NN
auto-insurance NN
AUTO-INSURANCE NN
AUTO-LOAN JJ
auto-maker NN
AUTO-MAKER NN
AUTOMAKERS NNS
auto-making NN
AUTO-MAKING NN
auto-market NN
AUTO-MARKET NN
Automated NNP VBN
automated-quotation NN
AUTOMATED-QUOTATION NN
automated-teller JJ NN
AUTOMATED-TELLER JJ NN
automated VBN JJ
AUTOMATED VBN JJ NNP
automates VBZ
AUTOMATES VBZ
AUTOMATICALLY RB
AUTOMATIC JJ NNP
Automatic NNP JJ
AUTOMATING VBG
AUTOMATION NN
AUTOMAX NNP
AUTOMOBILE NN NNP
AUTOMOBILE-PARTS JJ
Automobiles NNS
AUTOMOBILES NNS
AUTOMOTIVE-EMISSIONS-TESTING JJ
AUTOMOTIVE JJ NNP
AUTOMOTIVE-LIGHTING JJ
Automotive NNP JJ
AUTOMOTIVE-PARTS JJ
Auto NN NNP
AUTO NN NNP
AUTONOMOUS JJ
AUTONOMY NN
AUTO-REPAIR JJ
AUTO-SAFETY JJ
auto-sales NNS
AUTO-SALES NNS
AUTOS NNS
AUTO-STROP JJ
AUTOZAM NNP
AUTRY NNP
AUTUMN NN
AUTUMNS NNS
AUVIL NNP
AUXILIARY JJ
AVAILABILITY NN
AVAILABLE JJ
AVAIL NN
AVALANCHE NN
AVALON NNP
AVA NNP
AVANT-GARDE JJ NN
avant-garde NN JJ
AVARICIOUS JJ
AVCO NNP
AVDEL NNP
avec FW
AVEC FW
AVEDISIAN NNP
AVENA NNP
avenge VB
AVENGE VB
AVE NNP
AVE. NNP
AVENUE NNP NN
AVENUES NNS NNP
AVERAE NNP
averaged VBD VBN
AVERAGED VBD VBN
AVERAGE JJ NN NNP VBP VB
average JJ NN VBP VB
Average NNP JJ NN
averages NNS VBZ
AVERAGES NNS VBZ
averaging VBG NN
AVERAGING VBG NN
averred VBD
AVERRED VBD
averted VBN
AVERTED VBN
AVERTING VBG
averts VBZ
AVERTS VBZ
avert VB
AVERT VB
AVERY NNP
AVIACION NNP
AVIANCA NNP
AVIATION NNP NN
AVIATORS NNS
avid JJ
AVID JJ
AVIDLY RB
AVI NNP
AVIONS NNP
AVIS NNP
AVIVA NNP
AVIV NNP
AVMARK NNP
AVNER NNP
AVOIDANCE NN NNP
AVOIDED VBD
avoided VBN VBD
AVOIDED VBN VBD
Avoiding VBG
AVOIDING VBG
avoids VBZ
AVOIDS VBZ
avoid VB VBP
AVOID VB VBP
AVONDALE NNP
Avon NNP NN
AVON NNP NN
AVRETT NNP
avuncular JJ
AVUNCULAR JJ
AVX NNP
AWAD NNP
awaited VBD
AWAITED VBD
AWAITING VBG
awaits VBZ
AWAITS VBZ
await VBP VB
AWAIT VBP VB
awake JJ RB
awakened VBN
AWAKENED VBN
AWAKE RB JJ
awarded VBD VBN
AWARDED VBD VBN
awarding VBG NN
AWARDING VBG NN
award NN VB
AWARD NN VB
awards NNS VBZ
AWARDS NNS VBZ
AWARD-WINNING JJ
aware JJ
AWARE JJ
awareness NN
AWARENESS NN
AWASH JJ RB
awash RB JJ
AWAY-FROM-HOME JJ
Away RB
away RB RP
AWAY RB RP
AWED JJ
awesome JJ
AWESOME JJ
AWFUL JJ
AWFULLY RB
awhile RB
AWHILE RB
awkward JJ
AWKWARD JJ
A&W NNP
awoke VBD
AWOKE VBD
awry RB JJ
AWRY RB JJ
aw UH
Aw UH
AW UH
AXA-MIDI NNP
AXA NNP
AXE NNP
AXIOMATIC JJ
AXIOM NN
AXIOMS NNS
AXLES NNS
AX NN
AYALA NNP
AYATOLLAH NN
AYCOCK NNP
AYER NNP
AYERS NNP
AZARA NNP
AZEM NNP
AZERBAIJAN NNP
AZIONI NNP
AZIZA NNP
AZOFF NNP
AZTAR NNP
Aztec JJ
AZTEC JJ
AZT NNP
AZUCENA NNP
azure JJ
AZURE JJ
B-1B JJ NN
B-1B NN JJ
B-1 JJ
B2 NN JJ
B-2 NN NNP JJ
B-2 NNP NN JJ
B-2s NNS
B-2S NNS
B-3 JJ NNP
B-3 NNP JJ
Ba-2 JJ
BA-2 JJ
Ba3 JJ NN
BA3 JJ NN
Ba-3 JJ NN CD
BA-3 JJ NN CD
Baa-1 JJ
BAA-1 JJ
Baa2 JJ
BAA2 JJ
Baa-2 JJ NNP
BAA-2 NNP JJ
Baa3 JJ
BAA3 JJ
Babble NN
BABBLE NN
BABCOCK NNP
Babelists NNS
BABELISTS NNS
BABEL NN NNP
BABE NNP
Babies NNS
BABIES NNS
BABY-FACED JJ
BABYLONIAN NNP
BABY NN NNP
BACARELLA NNP
BACCALAUREATE NN
BACHELOR NN
BACHE NNP
Baches NNPS
BACHES NNPS
BACHMANN NNP
BACHMAN NNP
Bach NNP NN
BACH NNP NN
BACHTOLD NNP
Bacillus NN
BACILLUS NN
backbench JJ
BACKBENCH JJ
BACKBONE NN
backdated VBD
BACKDATED VBD
back-dating VBG
BACK-DATING VBG
BACKDROP NN
BACKED-UP JJ
BACKED VBD
backed VBN VBD JJ
BACKED VBN VBD JJ NNP
BACK-END JJ
BACKE NNP
BACKER NNP NN
BACKERS NNS
backfired VBN VBD
BACKFIRED VBN VBD
backfires VBZ
BACKFIRES VBZ
backfire VB VBP
BACKFIRE VB VBP
backflips VBZ
BACKFLIPS VBZ
BACKGROUND NN
BACKGROUNDS NNS
BACKHOE NN
BACKHOME NN
backing VBG NN
BACKING VBG NN
BACKLASH NN
backlit JJ
BACKLIT JJ
Backlog NN
BACKLOG NN
BACKLOGS NNS
BACKLOTS NNS
back-office NN JJ
BACK-OFFICE NN JJ
BACK-ON-TERRA-FIRMA JJ
BACKPACKERS NNS
BACKPACKS NNS
back-pay NN
BACK-PAY NN
BACKPEDALING VBG
Back RB NNP JJ
back RB RP NN JJ VB VBP
BACK RB RP NN JJ VB VBP NNP
Backseat NN
BACKSEAT NN
BACKSIDE NN
BACKSLAPPING VBG
backstage RB
BACKSTAGE RB
BACKSTOP NN
Backs VBZ
backs VBZ NNS
BACKS VBZ NNS
BACK-TO-BACK JJ
Backup JJ
BACKUP JJ NN
back-up NN JJ
backup NN JJ
BACK-UP NN JJ
back-ups NNS
BACK-UPS NNS
backward RB
BACKWARD RB
backwards JJ RB
BACKWARDS RB JJ
BACKWATER NN
BACK-YARD JJ
BACKYARD NN
BACON NN NNP
BACTERIA-FREE JJ
bacterial JJ
BACTERIAL JJ
bacteria NNS
BACTERIA NNS
BACTERIUM NN
baddebt JJ
BADDEBT JJ
BADEN-WUERTTEMBERG NNP
BADEN-WUERTTEMBURG NNP
BAD-EXPECTATIONS JJ
BADGE NN
BADGES NNS
Bad JJ NNP
bad JJ RB
BAD JJ RB NNP
bad-law NN
BAD-LAW NN
Badly RB
BADLY RB
BAD-NEWS JJ
BAER NNP
baffling JJ
BAFFLING JJ
BAGGAGE NN
BAGHDAD NNP
BAG NN
BAGPIPE NN
BAGS NNS
Bahamas NNPS
BAHAMAS NNPS
BAILARD NNP
bailed VBD
BAILED VBD
BAILEY NNP
BAILIFF NN
Bailiffs NNS
BAILIFFS NNS
BAILING VBG
BAILIT NNP
bail-jumping NN
BAIL-JUMPING NN
BAILOUT NN
BAILOUTS NNS
bail VB NN
BAIL VB NN
BAILY NNP
BAIM NNP
BAINBRIDGE NNP
BAIN NNP
BAIRD NNP
BAIT NN
BAJAKIAN NNP
Baja NNP NN
BAJA NNP NN
BAKED JJ
BAKERIES NNS
BAKER NNP NN
BAKERSFIELD NNP
BAKERS NNS
BAKERY NN NNP
BAKES NNP
BAKEWARE NN
BAKING NNP
BAKKER NNP
BAKSHEESH NN
BALAG NNP
BALANCED-BUDGET JJ
balanced JJ VBN
BALANCED JJ VBN
balance NN VB
BALANCE NN VB NNP
balance-of-payments NNS JJ
BALANCE-OF-PAYMENTS NNS JJ
balance-sheet NN
BALANCE-SHEET NN
BALANCES NNS
balances NNS VBZ
BALANCES NNS VBZ NNP
BALANCHINE NNP
balancing VBG NN
BALANCING VBG NN
BALA NNP
BALCONIES NNS
BALCONY NN
BALCOR NNP
BALD-FACED JJ
bald JJ
BALD JJ
BALDWIN NNP
BALES NNS
BALFOUR NNP
BALI NNP
BALKANIZED JJ
balked VBD
BALKED VBD
BALKING VBG
BALKS VBZ
balk VB VBP
BALK VB VBP
BALLADUR NNP
BALLANTINE\/DEL NNP
BALLARD NNP
ball-bearing NN
BALL-BEARING NN
BALLERINAS NNS
BALLETIC JJ
BALLET NN NNP
BALLETS NNS NNP
BALLHAUS NNP
BALLISTIC JJ
BALL NN NNP
ballooned VBD VBN
BALLOONED VBD VBN
Ballooning NN
ballooning NN VBG
BALLOONING NN VBG
BALLOONISTS NNS
Balloon NNP NN
balloon NN VB
BALLOON NN VB NNP
balloons NNS VBZ
BALLOONS NNS VBZ
BALLOT-BURNING JJ
balloting NN
BALLOTING NN
Ballot NN
BALLOT NN
BALLOTS NNS
BALLPARK NN
BALLPARKS NNS
BALLPLAYER NN
BALLPLAYERS NNS
BALLROOM NN
BALLS NNS
BALLWIN NNP
ballyhooed VBN
BALLYHOOED VBN
BALLY NNP
BALM NN
Balmy JJ
BALMY JJ
BALONEY NN
Baltic JJ NNP
BALTIC NNP JJ
Baltimore-based JJ
BALTIMORE-BASED JJ
BALTIMORE NNP
BALTIMORE-WASHINGTON NNP
BALZAC NNP
BAMBI NNP
bamboozled VBN
BAMBOOZLED VBN
Bam UH
BAM UH
BANALIZATION NN
banal JJ
BANAL JJ
BANANA-EXPORTING JJ
BANANA NN NNP
BANANAS NNS
BANCA NNP
BANC NNP
BANCOKLAHOMA NNP
BANCO NNP
BANCORP NNP
BANCORP. NNP
BANCROFT NNP
Bancshares NNP NNPS
BANCSHARES NNP NNPS
BANDAGES NNS
banded VBN
BANDED VBN
bandied VBN
BANDIED VBN
BANDLER NNP
BAND NN NNP VB
band NN VB
BANDOW NNP
BANDS NNS
BAND-WAGON JJ
BANDWAGON NN
BANE NN
BANERIAN NNP
BANGKOK NNP
BANGLADESH NNP
BANG NN NNP VB
bang NN VB
bangs VBZ
BANGS VBZ
banished VBN
BANISHED VBN
BANISHMENT NN
banish VB
BANISH VB
BANKAMERICA NNP
BANK-BACKED JJ
BANK-BAITING JJ
BANK-BRANCH JJ
BANKCARD NNP
bank-credit NN
BANK-CREDIT NN
bank-debt NN
BANK-DEBT NN
BANKER NN NNP
Bankers NNPS NNP NNS
BANKERS NNS NNPS
BANKERS NNS NNPS NNP
BANK-FRAUD JJ
BANKHAUS NNP
BANK-HOLDING JJ
BANKING NN NNP VBG JJ
Banking NNP NN
banking NN VBG JJ
BANKING-RELATED JJ
BANK-LOOTING JJ
BANK NN NNP VB VBP
Bank NNP NN VB
bank NN VB VBP
BANKNOTE NNP
BANKROLLING VBG
bankroll VBP VB
BANKROLL VB VBP
BANKRUPTCIES NNS
bankruptcy-court NN JJ
BANKRUPTCY-COURT NN JJ
bankruptcy-law NN JJ
BANKRUPTCY-LAW NN JJ
BANKRUPTCY NN NNP
Bankruptcy NNP NN
bankruptcy-reorganization NN
BANKRUPTCY-REORGANIZATION NN
bankrupt JJ VB VBP
BANKRUPT JJ VB VBP
bankrupty-law NN
BANKRUPTY-LAW NN
Bankshares NNPS
BANKSHARES NNPS
Banks NNS NNP NNPS
BANKS NNS NNP NNPS
bank-teller NN
BANK-TELLER NN
BANKWATCH NNP
banned VBN VBD
BANNED VBN VBD
BANNER NN
BANNERS NNS
banning VBG NN
BANNING VBG NN
ban NN VB VBP
BAN NN VB VBP
BANPONCE NNP
BANQUE NNP
banquet-hall NN
BANQUET-HALL NN
BANQUET NN
BANSHEES NNS
bans NNS VBZ
BANS NNS VBZ
BANSTAR NNP
BANTER NN
BANXQUOTE NNP
BAPILLY NNP
BAPTISM NN
BARABBA NNP
BARABOLAK NNP
BARAKAT NNP
BARASCH NNP
BARBADOS NNP
BARBA NNP
BARBARA NNP
BARBARESCO NNP
BARBECUE NN
barbed VBN
BARBED VBN
BARBERA NNP
BARBER-GREENE NNP
BARBER NNP NN
BARBERS NNS
BARBERTON NNP
BARBIE NNP
BARBIER-MUELLER NNP
BARBRA NNP
BARBS NNS
BARCALOUNGER NNP
Barcelona-based JJ
BARCELONA-BASED JJ
BARCELONA NNP
BARCLAY NNP
BARCLAYS NNP
BARCO NNP
BARDAGY NNP
BARD\/EMS NNP
BARD NNP
BARE-BONES JJ
BARE-FACED NNP
bare JJ
BARE JJ
BARELL NNP
Barely RB
BARELY RB
BARFIELD NNP
BARGAIN-BASEMENT JJ NN
bargain-basement NN JJ
bargained VBD VBN
BARGAINED VBD VBN
bargain-hunters NNS
BARGAIN-HUNTERS NNS
Bargain-hunting NN
bargain-hunting NN JJ
BARGAIN-HUNTING NN JJ
bargain-hunt VB
BARGAIN-HUNT VB
bargaining NN VBG
BARGAINING NN VBG
Bargain NN
bargain NN VB
BARGAIN NN VB
BARGAINS NNS
bargelike JJ
BARGELIKE JJ
Barge NN
BARGE NN
BARGEN NNP
barges NNS VBZ
BARGES NNS VBZ
BARILLA NNP
BARING NNP VBG
Barings NNPS
BARINGS NNPS
BARIS NNP
BARITONE NN
BARKING VBG
BARKLEY NNP
BARK-NIBBLING JJ
BARKSDALE NNP
BARLETTA NNP
BARLEY NN
BARLOW NNP
BARNABAS NNP
BARNACLES NNS
BARNARD NNP
BARNES NNP
BARNETT NNP
BARNEY NNP
BARNEYS NNP
BARNHARDT NNP
BARNICLE NNP
BARN NN NNP
BAR NN NNP VB
Bar NNP VB NN
bar NN VB
BARNS NNS
BARNUM NNP
BARNYARD NN
BAROMETER NN
BARON NNP
BARONS NNS
baroque JJ
BAROQUE JJ
barracks NN
BARRACKS NN
BARRAGE NN
BARRAH NNP
Barred VBN
barred VBN VBD
BARRED VBN VBD
BARREL-A-DAY JJ
BARRELING VBG
BARREL NN
Barrels NNS
BARRELS NNS
barren JJ
BARREN JJ
BARRE NNP
BARRET NNP
BARRETT NNP
BARRICADES NNS
BARRICK NNP
BARRIER-FREE JJ
barrier-island NN
BARRIER-ISLAND NN
BARRIER NN NNP
BARRIERS NNS
Barring VBG
BARRING VBG
BARRIS NNP
BARR NNP
BARRON NNP
BARROOM NN
BARROW NNP
BARRY NNP
bars NNS VBZ
BARS NNS VBZ
BARTENDERS NNS
bartered VBN
BARTERED VBN
bartering NN
BARTERING NN
BARTH NNP
BARTHOLOW NNP
BARTLESVILLE NNP
BARTLETT NNP
BART NNP
BARTON NNP
BASEBALL-CARD JJ
BASEBALL-LOVING JJ
Baseball NN NNP
BASEBALL NN NNP
BASEBALLS NNS
Based VBN
based VBN VBD
BASED VBN VBD
Basel-based JJ
BASEL-BASED JJ
BASELESS JJ
baseline NN JJ
BASELINE NN JJ
BASEL NNP
BASEMAN NN
BASEMENT NN
BASEMENTS NNS
BASE NN JJ NNP VB VBP
base NN JJ VBP VB
base-price NN
BASE-PRICE NN
BASE-RATE JJ
bases NNS VBZ
BASES NNS VBZ
BASF NNP
BASHAM NNP
BASHERS NNP
Bashing VBG
bashing VBG NN
BASHING VBG NN
bash NN VB
BASH VB NN
Basically RB
BASICALLY RB
basic JJ NN
Basic JJ NNP
BASIC JJ NNP NN
BASICS NNS
BASIL NNP
BASINGER NNP
BASING VBG
BASIN NNP
BASIR NNP
basis NN
BASIS NN
basketball-cutback NN
BASKETBALL-CUTBACK NN
BASKETBALL NN NNP
Basketball NNP NN
BASKET NN NNP
Baskets NNS
BASKETS NNS
BASSE NNP
BASSIST NN
bass NN
Bass NNP NN
BASS NNP NN
BASSOON NN
BASTION NN
BASTIONS NNS
BATAAN NNP
BATANGAS NNP
BATCHELDER NNP
BATCHES NNS
Batch NN
BATCH NN
BATED JJ
BATEMAN NNP
BATES NNP
bathed VBN
BATHED VBN
bathing NN
BATHING NN
BATH NN
BATHROOM NN
BATHROOMS NNS
BATHS NNS
BATHTUB NN
BATIBOT NNP
BATMAN NNP
BAT NN
B.A.T NNP NN
BATON NNP
BAT-ROOST JJ
BATS NNS
Battalion-2000 NN
BATTALION-2000 NN
BATTALION NN
BATTALIONS NNS
batted VBD VBN
BATTED VBD VBN
BATTELLE NNP
BATTEN NNP
battered VBN JJ VBD
BATTERED VBN JJ VBD
BATTERIES NNS
BATTERING VBG
batter NN VB
BATTER NN VB
BATTERYMARCH NNP
BATTERY NN NNP
BATTERY-OPERATED JJ
BATTERY-POWERED JJ
batting NN VBG
BATTING NN VBG
BATTISTA NNP
BATTLED VBD
battled VBD VBN
BATTLED VBD VBN
BATTLEFIELD NN
BATTLEGROUND NN
BATTLEGROUPS NNS
BATTLEMENTS NNS
BATTLE NN NNP VBP VB
Battle NNP NN
battle NN VBP VB
battles NNS VBZ
BATTLES NNS VBZ
Battle-tested JJ
BATTLE-TESTED JJ
BATTLING VBG
BAUERNFEIND NNP
BAUER NNP
BAULIEU NNP
BAUMAN NNP
BAUM NNP
BAUSCH NNP
BAUSER NNP
BAVARIA NNP
BAXLEY NNP
BAXTER NNP
Bay-area JJ
BAY-AREA JJ
BAYERISCHE NNP
BAYER NNP
Bay NNP NN
BAY NNP NN
BAYONNE NNP
BAYS NNS
BAZY-SIRE NNP
BBB NNP
BBDO NNP
BBN NNP
B.B. NNP
B.C.-based JJ
B.C.-BASED JJ
BCE NNP
BCI NNP
BDDP NNP
BDO NNP
BEACHED JJ
BEACHES NNS
beachfront JJ
BEACHFRONT JJ
beach-house NN
BEACH-HOUSE NN
Beach NNP NN
BEACH NNP NN
BEACON NNP
BEADLESTON NNP
BEADS NNS
Beady JJ
BEADY JJ
BEAIRSTO NNP
BEALE NNP
BEALL NNP
BEAL NNP
beamed VBN
BEAMED VBN
BEAME NNP
beaming JJ VBG
BEAMING JJ VBG
BEAM NNP NN
beams VBZ
BEAMS VBZ
BEANBALLS NNS
bean-counting NN
BEAN-COUNTING NN
BEAN NNP NN
BEANS NNS
BEANSTALK NN
BEANTOWN NNP
BEARABLE JJ
BEARDED JJ
bearing NN VBG
BEARING NN VBG
BEARINGS NNS NNP
bearish JJ
BEARISH JJ
Bear NNP JJ
BEAR NNP NN VB VBP JJ
bear NN VB VBP
BEARS-CLEVELAND NNP
Bears NNPS NNS
bears VBZ NNS
BEARS VBZ NNS NNPS
BEASTIES NNS
BEAST NN
BEASTS NNS
beaten VBN JJ
BEATEN VBN JJ
BEATIFIC JJ
beating NN VBG
BEATING NN VBG
BEATLES NNP
Beat NN
BEAT NN
Beatrice NNP NN
BEATRICE NNP NN
beats VBZ NNS
BEATS VBZ NNS
BEATTY NNP
BEAT-UP JJ
beat VB VBD VBP NN JJ
BEAT VB VBD VBP NN JJ
BEAUBIEN NNP
BEAUMONT NNP
BEAU NNP
BEAUREGARD NNP
BEAUTIFUL JJ
BEAUTIFULLY RB
Beauty NN NNP
BEAUTY NN NNP
BEAUX NNP
BEAVER NNP
BEAVERTON NNP
BEAZER NNP
BEBEAR NNP
BEBOP NNP
became VBD
BECAME VBD
becase IN
BECASE IN
Because IN
because IN RB
BECAUSE IN RB
BECCA NNP
BECHTEL NNP
BECKER NNP
BECKMAN NNP
BECK NNP
BECKWITH NNP
becomes VBZ
BECOMES VBZ
Become VB
BECOME VB
become VB VBN VBP VBD
BECOME VB VBN VBP VBD
BECOMING VBG
BECTON NNP
BEDDALL NNP
bedding NN
BEDDING NN
bedeviled VBN
BEDEVILED VBN
bedevil VB
BEDEVIL VB
Bedfellows NNS
BEDFELLOWS NNS
BEDFORD NNP
BEDLAM NN
BEDMINSTER NNP
bed NN
BED NN
BEDPANS NNS
bedridden JJ
BEDRIDDEN JJ
BEDROCK NN
BEDROOM NN
BEDROOMS NNS
BEDSIDE NN
BEDS NNS
BEEBE NNP
Beebes NNPS
BEEBES NNPS
BEECHAM NNP
BEECH NNP
BEECH-NUT NNP
BEEFEATER NNP
beefed VBD VBN
BEEFED VBD VBN
BEEFING VBG
Beef NN
beef NN VB
BEEF NN VB
beefy JJ
BEEFY JJ
BEE NNP
Been VBN
been VBN VBP
BEEN VBN VBP
beeper NN JJR
BEEPER NN JJR
beeping NN VBG
BEEPING NN VBG
BEEP NN
BEEPS NNS
beer-belly NN
BEER-BELLY NN
beer-distribution NN
BEER-DISTRIBUTION NN
beer-industry NN
BEER-INDUSTRY NN
BEERMANN NNP
BEER NN
BEER NN NNP
BEER-RELATED JJ
BEERS NNP NNS
BEES NNS
BEESWAX NN
BEETHOVEN NNP
BEET NN
befallen VBN
BEFALLEN VBN
befall VBP
BEFALL VBP
befell VBD
BEFELL VBD
befitting JJ
BEFITTING JJ
BEFORE-AND-AFTER JJ
beforehand RB
BEFOREHAND RB
Before IN RB
before IN RB RP
BEFORE IN RB RP
BEFORE-TAX JJ
befriended VBN
BEFRIENDED VBN
befuddled VBD
BEFUDDLED VBD
began VBD
BEGAN VBD
BEGGARS NNS
BEGGAR-THY-NEIGHBOR JJ
begged VBN
BEGGED VBN
BEGGIATO NNP
BEGGING VBG
BEGHIN NNP
BEGHIN-SAY NNP
begining NN
BEGINING NN
BEGINNINGS NNS
beginning VBG NN
Beginning VBG NN
BEGINNING VBG NN
begins VBZ
Begins VBZ
BEGINS VBZ
begin VB VBP
BEGIN VB VBP
begot VBD
BEGOT VBD
begs VBZ
BEGS VBZ
begun VBN
BEGUN VBN
beg VB
BEG VB
BEHALF NN
behaved VBD VBN
BEHAVED VBD VBN
behaves VBZ
BEHAVES VBZ
behave VB
BEHAVE VB
BEHAVING VBG
behavioral JJ
BEHAVIORAL JJ
behavior-modification NN
BEHAVIOR-MODIFICATION NN
BEHAVIOR NN
BEHAVIORS NNS
beheading NN
BEHEADING NN VBG
Beheading VBG
BEHEMOTH NN
BEHEMOTHS NNS
BEHEST NN
Behind IN
behind IN RB RP NN
BEHIND IN RB RP NN
BEHIND-SCHEDULE JJ
BEHIND-THE-SCENES JJ
beholden JJ
BEHOLDEN JJ
BEHRENDT NNP
BEHRINGWERKE NNP
beige JJ
BEIGE JJ NNP
BEIGEL NNP
BEIJING NNP
BEINGS NNS
Being VBG
BEING VBG
being VBG NN JJ VBG|JJ
BEING VBG NN JJ VBG|JJ
BEIRUT NNP
BEISE NNP
BEIT NNP
BEKAA NNP
BELATED JJ
Belatedly RB
BELATEDLY RB
BELCH NN
BELDING NNP
beleaguered JJ VBN
BELEAGUERED JJ VBN
BELFAST NNP
BELFRIES NNS
BELFRY NN
Belgian JJ NNP
BELGIAN JJ NNP
BELGIQUE NNP
Belgium NNP NN
BELGIUM NNP NN
belied VBD
BELIED VBD
BELIEF NN
BELIEFS NNS
BELIER NNP
BELIEVABLE JJ
BELIE VBP VB
belie VB VBP
believed VBN VBD
BELIEVED VBN VBD
BELIEVER NN
believes VBZ
BELIEVES VBZ
believe VBP VB
BELIEVE VBP VB
BELIEVING VBG
BELIN NNP
belittle VB
BELITTLE VB
BELLA NNP
BELLAS NNP
belle FW
BELLE FW
BELLEVUE NNP
BELLIES NNS
BELLI NNP
BELL NNP NN
BELLO NNP
BELLOWS NNP
bellow VB
BELLOW VB
bell-ringer NN
BELL-RINGER NN
BELLRINGERS NNS
BELL-RINGING JJ
Bells NNP NNPS
BELLS NNS NNP NNPS
BellSouth-LIN JJ NNP
BELLSOUTH-LIN NNP JJ
BELLSOUTH NNP
bellwether NN JJ
BELLWETHER NN JJ
BELLWETHERS NNS
belly-flopped VBD
BELLY-FLOPPED VBD
belly NN
BELLY NN
belly-up RB
BELLY-UP RB
BELMONT NNP
Belmonts NNPS
BELMONTS NNPS
BEL NN NNP
Bel NNP NN
belonged VBD
BELONGED VBD
BELONGINGS NNS
BELONGING VBG
belongs VBZ
BELONGS VBZ
belong VB VBP
BELONG VB VBP
BELO NNP
BELORUSSIAN NNP
BELO-UNIVERSAL NNP
BELOVED JJ
below IN RB
BELOW IN RB
BELOW-MARKET JJ
BELTH NNP
BELTING VBG
Belt NNP NN
BELT NNP NN
BELTS NNS
Beltway-itis NN
BELTWAY-ITIS NN
BELTWAY NN NNP
BELZBERG NNP
Belzbergs NNPS
BELZBERGS NNPS
BELZ NNP
BEMOANING VBG
BEMUSED JJ
BENACKOVA NNP
BENAZIR NNP
BENCHES NNS
Benchmark JJ
benchmark NN JJ
BENCHMARK NN JJ
BENCHMARKS NNS
BENCH NN
BENDA NNP
BENDECTIN NNP
BENDING VBG
BENDIX\/KING NNP
bend VB
BEND VB
beneath IN
Beneath IN
BENEATH IN
BENEDEK NNP
BENEFACTOR NN
BENEFACTORS NNS
beneficial JJ
BENEFICIAL JJ NNP
Beneficiaries NNS
BENEFICIARIES NNS
beneficiary NN
BENEFICIARY NN
benefited VBD VBN
BENEFITED VBD VBN
BENEFITING VBG
Benefit NNP VB
BENEFIT NN VB NNP VBP
benefit NN VB VBP
BENEFIT-PLAN JJ
benefit-seeking NN
BENEFIT-SEEKING NN
BENEFITS NNS
benefits NNS VBZ
BENEFITS NNS VBZ
BENELUX NNP
benevolent JJ
BENEVOLENT JJ
BENG NNP
BENIGHTED JJ
benign JJ
BENIGN JJ
BENJAMIN NNP
BENJ NNP
BENNETT NNP
BENNIGSEN-FOERDER NNP
BENNINGER NNP
BEN NNP
BENNY NNP
BENS NNP
BENSONHURST NNP
BENSON NNP
BENTLEY NNP
bent NN JJ
BENT NN JJ NNP
BENTON NNP
BENTSEN NNP
BENZ NNP
bequeathed VBD
BEQUEATHED VBD
BEQUEST NN
BEQUESTS NNS
berated VBD
BERATED VBD
BERBERA NNP
bereft JJ
BEREFT JJ
BERENS NNP
BERET NN
Berets NNPS
BERETS NNPS
BERETTA NNP
BERGEN NNP
BERGER NNP
BERG NNP
BERGSMA NNP
Berkeley NNP NN
BERKELEY NNP NN
BERKSHIRE NNP
BERLAND NNP
BERLINER NNP
Berlin NNP JJ
BERLIN NNP JJ
BERLITZ NNP
BERMAN NNP
Bermuda-based JJ
BERMUDA-BASED JJ
BERMUDA NNP
BERNARD NNP
BERNER NNP
BERNHARD NNP
BERNIE NNP
BERN NNP
BERNSTEIN-MACAULAY NNP
BERNSTEIN NNP
BEROL NNP
BERRA NNP
BERRIES NNS
BERRIGAN NNP
BERRI NNP
Berry NNP NN
BERRY NNP NN
BERSHAD NNP
BERSON NNP
BERTHOLD NNP
BERTIE NNP
BERTIN NNP
BERT NNP
BERTOLOTTI NNP
BERTOLT NNP
BERTRAM NNP
BERTRAND NNP
BERTUSSI NNP
BESELER NNP
beset VBN JJ
BESET VBN JJ
beside IN RB
BESIDE IN RB
besides IN
Besides IN RB
BESIDES IN RB
besieged VBN JJ
BESIEGED VBN JJ
BESSEMER NNP
bested VBN VBD
BESTED VBN VBD
bestiary NN
BESTIARY NN
bestirred VBN
BESTIRRED VBN
Best JJS RBS
best JJS RBS RB
BEST JJS RBS RB
BEST-KNOWN JJ JJS
best-known JJS JJ
BEST-OF-SEVEN JJ
bestowed VBN
BESTOWED VBN
best-performing JJ JJS
BEST-PERFORMING JJ JJS
BEST-PITCHER JJ
best-run JJS
BEST-RUN JJS
best-seller NN
BEST-SELLER NN
BESTSELLER NN
BEST-SELLING JJ JJS
best-selling JJS JJ
besuboru FW
BESUBORU FW
beta-blocker NN
BETA-BLOCKER NN
beta NN JJ
BETA NN JJ NNP
Beta NN NNP JJ
BETAS NNS
beta-thalassemia NN
BETA-THALASSEMIA NN
BETAWEST NNP
BETHESDA NNP
BETHFORGE NNP
BETHLEHEM NNP
Bethle NN
BETHLE NN
BETH NNP
BET NN VB VBD VBP RB NNP VBN
bet NN VB VBD VBP RB VBN
BETRAYAL NN
betrayed VBN
BETRAYED VBN
BETRAYER NN
Bets NNS
BETS NNS
BETSY NNP
BETTENCOURT NNP
BETTE NNP
BETTER JJR RBR RB NNP JJ RBR|JJR VB
better JJR RBR RB RBR|JJR JJ VB
BETTER-KNOWN JJ
BETTERMENT NN
Better NNP RBR JJR RB
BETTER-OFF JJ
BETTER-SAFE-THAN JJ
BETTERS NNS
BETTER-THAN-AVERAGE JJ
better-than-expected JJ NN
BETTER-THAN-EXPECTED NN JJ
betting VBG NN
BETTING VBG NN NNP
BETTNER NNP
BETTY NNP
Between IN
between IN RB
BETWEEN IN RB
BETWEN NN
BEULAH NNP
Be VB
BE VB
be VB VBP
BE VB VBP
BEVERAGE NN NNP
BEVERAGES NNS
BEVERLY NNP
BEVMARK NNP
BEVY NN
beware VB
Beware VB
BEWARE VB
bewildered VBN
BEWILDERED VBN
BEWILDERING VBG
bewitched VBN
BEWITCHED VBN
BEWKES NNP
BEW NNP
Beyond IN NNP
BEYOND IN NNP RB
beyond IN RB
B-flat NN
B-FLAT NN
B.F. NNP
BFREE NNP
B'GOSH NNP
BHABANI NNP
BHAGAT NNP
BHD. NNP
B&H NNP
BHUTTO NNP
BIA-COR NNP
BIAGGI NNP
BIANCHI NNP
biannual JJ
BIANNUAL JJ
biased VBN
BIASED VBN
BIASES NNS
bias NN
BIAS NN NNP
bible JJ NN
BIBLE NN JJ NNP
BIBLES NNS
bicameral JJ
BICAMERAL JJ
bicentennial JJ NN
BICENTENNIAL NN JJ
BICKEL NNP
bickered VBN
BICKERED VBN
bickering NN VBG
BICKERING NN VBG
BICKFORD NNP
BICK NNP
BICKWIT NNP
BICYCLE NN NNP
BICYCLES NNS
bicycling NN
BICYCLING NN NNP
BICYCLIST NN
Bicyclists NNPS
BICYCLISTS NNPS
BIDDER NN
BIDDERS NNS
Bidding NN
bidding NN VBG JJ
BIDDING NN VBG JJ
BIDEN NNP
BIDERMANN NNP
bid NN VB VBD VBN VBP
BID NN VB VBD VBN VBP NNP
Bids NNS
bids NNS VBZ
BIDS NNS VBZ
bid-to-cover JJ NN
BID-TO-COVER NN JJ
BID-WANTED JJ
BIEDERMANN NNP
BIEDERMAN NNP
BIEHL NNP
biennial JJ
BIENNIAL JJ
BIEN NNP
BIERBOWER NNP
BIFURCATED JJ
bifurcate VB
BIFURCATE VB
Big-bucks JJ
BIG-BUCKS JJ
big-business NN
BIG-BUSINESS NN
big-city JJ NN
BIG-CITY NN JJ
BIG-COMPANY JJ
Bigger JJR
BIGGER JJR
bigger JJR RBR
BIGGER JJR RBR
biggest JJS
Biggest JJS
BIGGEST JJS
BIGGEST-SELLING JJ
BIGGIE NN
BIGG NNP
big JJ
BIG JJ NNP
BIG-LEAGUE JJ
BIG-NAME JJ
Big NNP JJ
BIGOTRY NN
BIG-RISK JJ
BIG-SELLING JJ
BIG-SOULED JJ
BIG-STOCK JJ
BIG-TICKET JJ
BIG-TIME JJ
BIKE NN NNP
BIKER NN
Bikers NNS
BIKERS NNS
BIKES NNS
biking NN
BIKING NN NNP VBG
Biking NNP VBG
BIKINI NN NNP
BILANZ NNP
bilateral JJ
BILATERAL JJ
BILBAO NNP
BILBREY NNP
BILGES NNS
bilingual JJ
BILINGUAL JJ
BILIOUS JJ
BILKING VBG
billed VBN VBD
BILLED VBN VBD
BILLERICA NNP
BILLET NN
BILLFOLD NN
BILLIARDS NNP
BILLIE NNP
Billing NN
billing NN VBG
BILLING NN VBG
Billings NNS
BILLINGS NNS
Billionaire NN
BILLIONAIRE NN
BILLION-A-YEAR JJ
billion CD
Billion CD
BILLION CD
BILLION-DOLLAR JJ
billion-franc NN
BILLION-FRANC NN
BILLIONNAIRE NN
billion-plus CD JJ
BILLION-PLUS JJ CD
BILLION-POUND JJ
Billions NNS
BILLIONS NNS
BILLION-YEN JJ
BILL NN
BILL NN NNP VBP VB
Bill NNP NN
bill NN VB VBP
BILLOWING VBG
Bills NNS
BILLS NNS NNPS
BILLS NNS NNPS VBZ
bills NNS VBZ
BILLY NNP
BILZERIAN NNP
bimonthly JJ
BI-MONTHLY JJ
BIMONTHLY JJ
BINCE NNP
BINDAL NNP
BINDER NN NNP
BINDERS NNS
binding JJ VBG
BINDING JJ VBG
BIND NN
BINGE NN
BINGES NNS
BINGHAMTON NNP
BING NNP
BIN NN
BINOCULARS NNS
BINS NNS
BINY NNP
BIO-ANALYTICAL JJ
BIOCHEMIST NN
BIODEGRADABLE JJ
Bioengineers NNS
BIOENGINEERS NNS
BIOEQUIVALENCE-THERAPEUTIC-EQUIVALENCE JJ
BIOGEN NNP
biographer\/critic NN
BIOGRAPHER\/CRITIC NN
BIOGRAPHER NN
BIOGRAPHERS NNS
BIOGRAPHICAL NNP
BIOGRAPHY NN
BIOLOGICAL JJ NNP
Biological NNP JJ
BIOLOGIST NN
BIOLOGISTS NNS
BIOLOGY NN
BIOMEDICAL JJ
biomedical-products NNS
BIOMEDICAL-PRODUCTS NNS
BIONDI NNP
BIONDI-SANTI NNP
BIOPHYSICIST NN
BIOPSIES NNS
BIO-RAD NNP
bio-research NN
BIO-RESEARCH NN
BIORESEARCH NN
BioSciences NNP NNPS
BIOSCIENCES NNP NNPS
BIOSOURCE NNP
biotech JJ
BIOTECH JJ
BIOTECHNICAL NNP
BIOTECHNOLOGY NN NNP
bioTechnology NNP
BIO-TECHNOLOGY NNP
Biotechnology NNP NN
BIOVENTURES NNP
bipartisan JJ
BIPARTISAN JJ
BIPARTISANSHIP NN
biped NN
BIPED NN
BIP NNP
BI-POLAR JJ
BIRDCAGE NN
BIRD NN
BIRD'S-EYE JJ
BIRDS NNS
BIRINYI NNP
BIRKEL NNP
BIRK NNP
BIRMINGHAM NNP
BIRNBAUM NNP
BIRNEY NNP
BIRNS NNP
BIRTCHER NNP
birth-control JJ NN
BIRTH-CONTROL JJ NN
Birthday NN NNP
BIRTHDAY NN NNP
BIRTHDAYS NNS
BIRTHMARK NN
BIRTH NN
BIRTHPLACE NN
BIRTHS NNS
BISCAYNE NNP
BISCUIT NN NNP
Biscuits NNP NNPS
BISCUITS NNP NNS NNPS
BISHOP NN NNP
Bishops NNS
BISHOPS NNS
Bismarckian JJ
BISMARCKIAN JJ
BISSETT NNP
BITCH NN
bitchy JJ
BITCHY JJ
bite NN VB
BITE-SIZED JJ
bites VBZ NNS
BITES VBZ NNS
BITE VB NN
biting VBG JJ
BITING VBG JJ
Bit NN
bit NN RB JJ
BIT NN RB JJ
BITS NNS
bitten VBN
Bitten VBN
BITTEN VBN
bitterest JJS
BITTEREST JJS
bitter JJ
BITTER JJ
BITTERLY RB
bitterness NN
BITTERNESS NN
BIXBY NNP
bizarre JJ
BIZARRE JJ
BIZMART NNP
B.J. NNP
BK NNP
blabs VBZ
BLABS VBZ
Black-and-white JJ
BLACK-AND-WHITE JJ
BLACKBOARD NN
BLACK-DRAPED JJ
BLACKED-OUT JJ
blacked VBN
BLACKED VBN
blackened VBN
BLACKENED VBN
blackest JJS
BLACKEST JJS
BLACK-FIGURED JJ
BLACKFRIAR NNP
BLACKHAWK NNP
BLACKJACK NN NNP
black JJ NN
BLACK JJ NNP NN
blacklisting NN
BLACKLISTING NN
blacklist VB
BLACKLIST VB
blackmailed VBN
BLACKMAILED VBN
BLACKMAILERS NNS
BLACKMAILING VBG
blackmail VB
BLACKMAIL VB
BLACK-MAJORITY JJ
black-market NN
BLACK-MARKET NN
BLACKMUN NNP
Black NNP JJ NN
BLACKOUTS NNS
Blacks NNPS NNS
blacks NNS NNPS
BLACKS NNS NNPS
Blackstone NNP VBP
BLACKSTONE NNP VBP
BLACK-TIE JJ
BLADDER NN
BLADE NN
BLADES NNS
BLAGGS NNP
BLAINE NNP
BLAIR NNP
BLAKE NNP
blamed VBD VBN
Blamed VBN
BLAMED VBN VBD
blames VBZ
BLAMES VBZ
blame VB NN VBP
BLAME VB NN VBP
Blaming VBG
BLAMING VBG
BLANCHARD NNP
BLANC NNP
BLANCS NNP
BLANDINGS NNP NNS NNPS
Blandings NNPS NNS NNP
bland JJ
BLAND JJ
blandness NN
BLANDNESS NN
BLANDON NNP
BLANKENSHIP NNP
blanketed VBD
BLANKETED VBD
blanket NN VBP NN|JJ
BLANKET NN VBP NN|JJ
BLANKETS NNS
BLANK-FACED JJ
blank JJ NN
BLANK JJ NN
blared VBD
BLARED VBD
BLARNEY NN
BLASE JJ NN
blase NN JJ
BLASPHEMOUS JJ
blasted VBD
BLASTED VBD
BLASTING VBG
BLAST NN
blast NN VB
BLAST NN VB
BLASTS NNS
blatant JJ
BLATANT JJ
BLATANTLY RB
BLAZER NNP
blaze VBP NN
BLAZE VBP NN
BLAZING VBG
BLEACHED JJ
Bleacher NN
BLEACHER NN
BLEACHERS NNS
Bleach NN
BLEACH NN
bleak JJ
BLEAK JJ
BLECKNER NNP
bled VBD
BLED VBD
bleeding VBG NN
BLEEDING VBG NN
bleed VB
BLEED VB
BLEMISHES NNS
BLEMISH NN
BLENDED JJ
BLENDER NN
blending VBG NN
BLENDING VBG NN
blend NN VB
BLEND NN VB
BLENDS NNS
blessed VBN
BLESSED VBN
blessing NN
BLESSING NN
BLESSINGS NNS
bless VB
BLESS VB
BLEUS NNP
blew VBD
BLEW VBD
BLIGHTED JJ
BLINDER NNP
BLINDFOLDED JJ VBD
blindfolded VBD JJ
BLINDFOLD NN
blind JJ
Blind JJ NNP
BLIND JJ NNP
BLINDLY RB
blindness NN
BLINDNESS NN
BLIND-SIDED JJ
BLINDS NNS
blini NNS
BLINI NNS
blinked VBD
BLINKED VBD
BLINKERS NNS
blinking RB
BLINKING RB
blink NN VB
BLINK NN VB
blinks VBZ
BLINKS VBZ
blip NN VBP VB
BLIP NN VB VBP
BLIPS NNS
BLISSFUL JJ
BLITHELY RB
BLITZES NNS
BLITZ NN
BLOATED JJ
BLOCH NNP
BLOCKADE NN
blockbuster NN JJ
BLOCKBUSTER NNP NN JJ
Blocked VBN
blocked VBN VBD
BLOCKED VBN VBD
BLOCKER NN
BLOCKING VBG
Block NNP NN
blocks NNS VBZ
BLOCKS NNS VBZ
block VB NN JJ VBP
BLOCK VB NN NNP JJ VBP
BLOC NN NNP
BLODGETT NNP
BLOEDEL NNP
BLOHM NNP
blonde JJ
BLONDE JJ
Blondes NNPS NNS
BLONDES NNS NNPS
blond JJ
BLOND JJ
BLOOD-AND-GUTS JJ
BLOODBATH NN
blood-cell NN
BLOOD-CELL NN
blood-clot NN
BLOOD-CLOT NN
BLOOD-FILLED JJ
bloodied VBN
BLOODIED VBN
blood-letting NN
BLOOD-LETTING NN
BLOODLETTING VBG
BLOOD NN
BLOOD NN NNP
blood-red NN
BLOOD-RED NN
BLOODS NNS
BLOODSTREAM NN
bloody JJ
BLOODY JJ
BLOODY-MINDED JJ
BLOOMFIELD NNP
BLOOMINGDALE NNP
BLOOMINGDALES NNP
BLOOMINGTON NNP
BLOOMING VBG
BLOOM NNP
BLOOPER NN
BLOSSOMED VBD VBN
blossomed VBN VBD
BLOSSOM NNP
BLOSSOMS NNS
BLOT NNP
BLOTTING VBG
BLOUNT NNP
BLOUSE NN
BLOWING VBG
blow NN VB
BLOW NN VB
blown VBN
BLOWN VBN
BLOWS NNS
BLOWTORCH NN
blow-up NN
BLOW-UP NN
BLOWUP NN
bludgeoned VBN
BLUDGEONED VBN
bludgeon VB
BLUDGEON VB
BLUEBLOODS NNS
bluechip JJ
Blue-chip JJ
BLUE-CHIP JJ
BLUECHIP JJ
blue-chips NNS
BLUE-CHIPS NNS
BLUE-COLLAR JJ
BLUEFIELD NNP
blue JJ NN
BLUE JJ NNP NN
Blue NNP JJ
BLUEPRINT NN
BLUE-RIBBON JJ
Blues NNP NNS NNPS
BLUES NNPS
BLUES NNS NNPS NNP
bluest JJS
BLUEST JJS
bluesy JJ
BLUESY JJ
BLUFF NNP
bluish JJ
BLUISH JJ
BLUMENFELD NNP
BLUMENTHAL NNP
BLUM NNP
BLUMSTEIN NNP
blundered VBD
BLUNDERED VBD
blunder NN VB
BLUNDER NN VB
BLUNDERS NNS
blunted VBN VBD
BLUNTED VBN VBD
BLUNTLY RB
BLUNT NNP VB JJ
blunt VB JJ
blurred VBD
BLURRED VBD
BLURRING VBG
blurry JJ
BLURRY JJ
BLURTING VBG
blurt VBP
BLURT VBP
blur VB
BLUR VB
BLUSH NN
BMA NNP
BMC NNP
BMI NNP
BMP-1 NN
BMP NN NNP
BMW NNP
BMWs NNS
BMWS NNS
BNL NNP
B. NNP LS
B NNP NN
B NNP SYM NN LS
BOAKE NNP
BOA NN
BOARDING VBG
BOARD-LEVEL JJ
Board-listed JJ
BOARD-LISTED JJ
BOARD NN NNP VB
Board NNP NN
board NN VB
BOARDROOM NN
Boardrooms NNS
BOARDROOMS NNS
BOARD'S NNP
BOARDS NNS
boasted VBD VBN
BOASTED VBD VBN
boasts VBZ
BOASTS VBZ
BOAST VBP VB NN
boast VB VBP NN
BOAT-BUILDING JJ
BOATERS NNS
BOATING VBG
BOATLOAD NN
BOATMEN NNP
BOAT NN NNP
BOATS NNS
BOBAR NNP
BOBBY NNP
BOB NNP
BOCA NNP
BOCAS NNP
BOCCONE NNP
BOCHNIARZ NNP
BOCKIUS NNP
BOCK NNP
BOCKRIS NNP
BODACIOUS JJ
BODDINGTON NNP
BODEGAS NNS
bodes VBZ
BODES VBZ
bode VB
BODE VB NNP
BODIES NNS
BODMER NNP
BODNER NNP
BODY NN NNP
Body NNP NN
BODYWORKERS NNS
BOEHM NNP
BOEHRINGER-INGLEHEIM NNP
BOEHRINGER NNP
Boeing NNP VBG
BOEING NNP VBG
Boeings NNPS
BOEINGS NNPS
BOESEL NNP
BOESKY NNP
BOESKYS NNP
BOETTCHER NNP
BOFORS NNP
BOGACHEVA NNP
BOGA NNP
BOGART NNP
BOGDAN NNP
bogged VBD
BOGGED VBD
BOGGING VBG
BOGLE NNP
BOGNATO NNP
BOGNER NNP
BOGOTA NNP
BOGUS JJ
bog VB
BOG VB
BOHEME NNP
BOIES NNP
boiled VBD
BOILED VBD
BOILER NN
BOILERPLATE NN
boiler-room NN
BOILER-ROOM NN
BOILERS NNS
BOILING VBG
boils VBZ
BOILS VBZ
boil VB NN
BOIL VB NN
BOISE-CASCADE NNP
BOISE NNP
BOISVERT NNP
BOLAR NNP
bolder JJR
BOLDER JJR
boldest JJS
BOLDEST JJS
bold JJ
BOLD JJ
BOLDLY RB
BOLDUC NNP
BOLGER NNP
BOLINAS NNP
BOLIVIA NNP
BOLLINGER NNP
BOLLING NNP
BOLOGNA NNP
Bolsheviks NNPS
BOLSHEVIKS NNPS
Bolstered VBN
bolstered VBN VBD
BOLSTERED VBN VBD
Bolstering VBG
BOLSTERING VBG
bolsters VBZ
BOLSTERS VBZ
bolster VB
BOLSTER VB
bolted VBN
BOLTED VBN
BOLT NN
BOLTON NNP
BOLTS NNS
bombarded VBD VBN
BOMBARDED VBD VBN
BOMBARDING VBG
BOMBARDMENT NN
BOMBAST NN
BOMBAY NNP
BOMBECK NNP
bombed VBN VBD
BOMBED VBN VBD
BOMBER NN
BOMBERS NNS
bombing NN
BOMBING NN
BOMBINGS NNS
BOMBLETS NNS
bomb NN VB
BOMB NN VB
BOMBSHELL NN
BOMBS NNS
bona JJ
BONA JJ
BONANZA NN NNP
BONAVENTURE NNP
bonded VBN
BONDED VBN
BOND-EQUIVALENT JJ
bond-holders NNS
BOND-HOLDERS NNS
BONDHOLDERS NNS
BONDHOLDINGS NNS
bonding NN
BONDING NN
BOND-INSURANCE JJ
BOND-MARKET JJ
BOND NN
BOND NN NNP
Bond NNP NN
BOND-PRICE JJ
BOND-RATING JJ
BONDS NNS
Bonds NNS NNP NNPS
BONDS NNS NNP NNPS
bond-trading JJ NN
BOND-TRADING JJ NN
BONECRUSHER NNP
boned VBN
BONED VBN
bone-marrow NN
BONE-MARROW NN
BONE NN
BONES NNS
Bonfire NN NNP
BONFIRE NN NNP
bon FW
BONGO NNP
BONITA NNP
BONNELL NNP
BONNET NN
BONNETS NNS
BONNIE NNP
BONNIER NNP
BONNIERS NNP
BONN NNP
BON NNP FW
BO NNP
BONN-SPONSORED NNP
bono FW
BONO FW
BONOMO NNP
Bonuses NNS
BONUSES NNS
bonus NN
BONUS NN
BONWIT NNP
booby JJ
BOOBY JJ
booed VBD
BOOED VBD
BOOGIEMAN NN
BOOKCASE NN
booked VBN VBD
BOOKED VBN VBD
BOOK-ENTRY JJ
BOOKER NNP
BOOKERS NNS
booking NN VBG
BOOKING NN VBG
Bookings NNS
BOOKINGS NNS
BOOKIN NNP
BOOKKEEPER NN
bookkeeping NN
BOOKKEEPING NN
BOOKLET NN
BOOKLETS NNS
BOOKMAN NNP
BOOK NN NNP VB
Book NNP NN
book NN VB
BOOK-OF-THE-MONTH NNP
book-publishing NN
BOOK-PUBLISHING NN
Books NNPS NNS NNP
books NNS NN|POS
BOOKS NNS NNPS NN|POS NNP
BOOKSTORE NN
BOOKSTORES NNS
book-to-bill NN
BOOK-TO-BILL NN
BOOM-AND-BUST JJ
boomed VBD VBN
BOOMED VBD VBN
BOOMERS NNS
Booming JJ
booming JJ VBG
BOOMING JJ VBG
boom NN VB
BOOM NN VB
BOOM-OR-BUST JJ
BOOMS NNS
BOONE NNP
BOON NN NNP
BOON-SANWA NNP
boorish JJ
BOORISH JJ
BOORSE NNP
BOORSTYN NNP
boosted VBD VBN
BOOSTED VBD VBN
BOOSTERS NNS
BOOSTING VBG
BOOSTS NNS
boosts VBZ NNS
BOOSTS VBZ NNS
Boost VB
boost VB NN VBP
BOOST VB NN VBP
BOOTH NN
Booths NNS
BOOTHS NNS
bootlegged VBN
BOOTLEGGED VBN
BOOT NN
BOOTS NNS NNP
BOOZ-ALLEN NNP
BOOZE NN
BOOZING VBG
BORAX NNP
BORDEAUX NNP
BORDEN NNP
bordered VBN
BORDERED VBN
BORDERING VBG
BORDER NN NNP
BORDERS NNS
Bordetella NN
BORDETELLA NN
BOREDOM NN
bored VBN JJ
BORED VBN JJ
BOREN NNP
BORER NN
bore VBD NN
BORE VBD NN
BORGE NNP
BORGESON NNP
BORIE NNP
boring JJ VBG NN
BORING JJ VBG NN
BORINGLY RB
BORIS NNP
BORK NNP
BORLAND NNP
Born-again JJ
BORN-AGAIN JJ
BORNEO NNP
BORNER NNP
borne VBN
BORNE VBN
born VBN
Born VBN NNP
BORN VBN NNP
BOROUGH NN NNP
Borrowed VBN
borrowed VBN VBD JJ
BORROWED VBN VBD JJ
BORROWER NN
Borrowers NNS
BORROWERS NNS
borrowing NN VBG VBG|NN
BORROWING NN VBG VBG|NN
BORROWINGS NNS
borrows VBZ
BORROWS VBZ
borrow VB VBP
BORROW VB VBP
BORSCHT NNP
BORTEN NNP
BOSCH NNP
BOSCO NNP
BOSKET NNP
BOSKIN NNP
BOSOM NN
BOSQUE NNP
Bosses NNS
BOSSES NNS
boss NN
BOSS NN NNP
BOSTIAN NNP
BOSTIC NNP
BOSTIK NNP
Boston-based JJ
BOSTON-BASED JJ
Bostonians NNPS
BOSTONIANS NNPS
BOSTON NNP
BOSWORTH NNP
BOTANICAL JJ
BOTANY NN
botched VBN JJ
BOTCHED VBN JJ
BOTH DT
Both DT CC PDT
both DT CC PDT CD
BOTH DT CC PDT CD
bothered VBN VBD
BOTHERED VBN VBD
BOTHERING VBG
bothersome JJ
BOTHERSOME JJ
bother VB VBP
BOTHER VB VBP
bottled JJ VBN
BOTTLED JJ VBN
bottled-water NN
BOTTLED-WATER NN
BOTTLENECK NN
BOTTLENECKS NNS
bottle NN VB
BOTTLE NN VB
BOTTLER NN
BOTTLERS NNS
BOTTLES NNS
BOTTLING NN VBG NNP
bottling VBG NN
bottomed VBN VBD
BOTTOMED VBN VBD
BOTTOMING VBG
BOTTOMLESS JJ
BOTTOM-LINE JJ
bottom NN JJ VB
BOTTOM NN JJ VB
BOTTOMS NNS
BOUCHERON NNP
BOUDREAU NNP
BOUGAINVILLE NNP
bought VBD VBN
BOUGHT VBD VBN
BOUILLAIRE NNP
BOULDER NNP
BOULET NNP
BOULEVARD NNP NN
bounced VBD
BOUNCED VBD
bounces VBZ NNS
BOUNCES VBZ NNS
bounce VB NN VBP
BOUNCE VB NN VBP
BOUNCING VBG
BOUNDARIES NNS
boundary NN
BOUNDARY NN
BOUNDING VBG
bounds NNS VBZ
BOUNDS VBZ NNS
bound VBN JJ
BOUND VBN JJ
BOUNTY NN
BOUQUET NNP
Bourbon NN
BOURBON NN
BOURBONS NNS
BOURGEOIS-BASHING JJ
BOURKE NNP
BOURKE-WHITE NNP
Bourse NNP FW
BOURSE NNP FW
BOURSES NNP NNS
BOUTIQUE NN
BOUTIQUES NNS
boutique-store NN
BOUTIQUE-STORE NN
BOUT NN
BOUTS NNS
BOUTWELL NNP
Bouygues NNP NNS
BOUYGUES NNP NNS
BOVERI NNP
bovine JJ
BOVINE JJ
BOWATER NN NNP
Bowater NNP NN
BOWDER NNP
bowed VBD VBN
BOWED VBD VBN
BOWEL NN
BOWEN NNP
BOWERS NNP
BOWERY NNP
BOWES NNP
Bowing VBG
BOWING VBG
BOWKER NNP
BOWLES NNP
bowling NN VBG
BOWLING NN VBG NNP
BOWLING-RELATED JJ
BOWL NN NNP VBP
bowl NN VBP
bowls VBZ
BOWLS VBZ NNP
BOWMAN NNP
BOWNE NNP
bow VB NN VBP
BOW VB VBP NN
BOXER NN
Boxes NNPS
BOXES NNS NNPS
BOX NN NNP
box-office NN
BOX-OFFICE NN
boxy JJ
BOXY JJ
boycotted VBN
BOYCOTTED VBN
boycott NN VB
BOYCOTT NN VB
BOYD NNP
BOYER NNP
BOYFRIENDS NNS
boyish JJ
BOYISH JJ
BOY NN NNP UH
boy NN UH
Boys NNPS NNS NNP
BOYS NNS NNPS NNP
BOZELL NNP
BPCA NNP
BPC NNP
BP NNP
braced VBN VBD
BRACED VBN VBD NNP
BRACE NNP VB
brace VB
BRACHFELD NNP
BRACING VBG
BRACKET NN
BRACKNELL NNP
BRADFORD NNP
BRADLEY NNP
BRADSTREET NNP
BRADY NNP
Brady-type JJ
BRADY-TYPE JJ
BRAE NNP
BRAEUER NNP
bragging NN
BRAGGING NN
BRAGG NNP
brags VBZ
BRAGS VBZ
brag VB
BRAG VB
brah FW
BRAH FW
BRAHMS NNP
BRAIDS NNS
BRAIDWOOD NNP
BRAINCHILD NN
BRAIN NN
BRAINS NNS
BRAINTREE NNP
BRAIN-WAVE JJ
BRAITMAN NNP
BRAKE NNP
Brakes NNS
BRAKES NNS
BRAKING NNP VBG
BRAMALEA NNP
BRANCA NNP
branch-by-branch RB
BRANCH-BY-BRANCH RB
branched VBN
BRANCHED VBN
Branches NNS
BRANCHES NNS
BRANCHING NNP VBG
branch NN VB
BRANCH NN VB NNP
BRANDED JJ
brandished VBD
BRANDISHED VBD
BRANDISHING VBG
brand-name JJ NN
BRAND-NAME JJ NN
Brand-Name NN
Brand NN NNP
BRAND NN NNP
BRANDON NNP
Brands NNP NNPS NNS
BRANDS NNPS
BRANDS NNS NNP NNPS VBZ
brands NNS VBZ
BRANDY NN
BRANFORD NNP
BRANIFF NNP
BRA NN
BRANNIGAN NNP
BRAN NN NNP
BRANNON NNP
BRAN-PROCESSING JJ
BRANTFORD NNP
brash JJ
BRASH JJ
Brasil JJ
BRASIL JJ
BRASSIERES NNS
brass NN
BRASS NN
BRATISLAVA NNP
BRAT NN
BRATS NNS
BRAUCHLI NNP
BRAUEREI NNP
BRAUER NNP
Braumeisters NNPS
BRAUMEISTERS NNPS
BRAUN NNP
braved VBD
BRAVED VBD
brave JJ VB
BRAVE JJ VB NNP
Braves NNPS
BRAVES NNPS
bravest JJS
BRAVEST JJS
BRAVING VBG
BRAVO NNP
BRAVURA NN
BRAWER NNP
BRAWLEY NNP
BRAWL NN
Brawls NNS
BRAWLS NNS
brawny JJ
BRAWNY JJ
BRAYE NNP
brazen VB
BRAZEN VB NNP
Brazilian JJ
BRAZILIAN JJ
Brazilians NNS
BRAZILIANS NNS
BRAZIL NNP
breached VBD VBN
BREACHED VBD VBN
BREACHES NNS
breach NN VB
BREACH NN VB
BREACH-OF-CONTRACT JJ
BREAD-AND-BUTTER JJ
BREADBASKET NN
BREADBOX NN
breaded VBN
BREADED VBN
BREAD NN
BREADTH NN
BREAKAGE NN
break-down NN
BREAK-DOWN NN
BREAKDOWN NN
BREAKDOWNS NNS
BREAKER NN
BREAKERS NNS NNP
break-even JJ NN
BREAK-EVEN JJ NN
BREAKEY NNP
Breakfast NN
BREAKFAST NN
Breaking VBG
breaking VBG NN JJ
BREAKING VBG NN JJ
breakneck JJ
BREAKNECK JJ
Break NN
breaks NNS VBZ
BREAKS NNS VBZ
BREAKTHROUGH NN
BREAKTHROUGHS NNS
break-up NN
BREAK-UP NN
BREAKUP NN
break VB NN VBP
BREAK VB NN VBP
BREAN NNP
BREA NNP
breast-cancer NN
BREAST-CANCER NN
BREAST NN
BREASTS NNS
breathed VBD
BREATHED VBD
BREATHER NN
breathe VB
BREATHE VB
BREATHING NN VBG
breathing VBG NN
BREATHLESSLY RB
BREATH NN
BREATHS NNS
breathtaking JJ
BREATHTAKING JJ
breathy JJ
BREATHY JJ
Brechtian JJ
BRECHTIAN JJ
BRECHT NNP
bred VBN VBD
BRED VBN VBD
BREEDEN NNP
BREEDER NN NNP
Breeders NNS NNP
BREEDERS NNS NNP
breeding VBG NN
BREEDING VBG NN
BREED NN VBP VB
breed NN VB VBP
BREENE NNP
BREEZE NN
BREEZES NNS
breezier JJR
BREEZIER JJR
breezy JJ
BREEZY JJ
BREGER NNP
BREMEN NNP
BRENDAN NNP
BRENDA NNP
BRENDEL NNP
BRENMOR NNP
BRENNAN NNP
BRENT NNP
BREST NNP
brethren NNS
BRETHREN NNS
BRETZ NNP
BREUNERS NNP
BREVETTI NNP
brewed VBN
BREWED VBN
Breweries NNPS NNS
BREWERIES NNS NNPS
BREWER NN
BREWERS NNS
Brewery NNP NN
BREWERY NNP NN
BREWING NN NNP VBG
brewing NN VBG
brew NN VB
BREW VB NN
BREZHNEVITE NNP
BREZINSKI NNP
BRIAN NNP
BRIARCLIFF NNP
bribed VBD VBN
BRIBED VBD VBN
Bribe NN
bribe NN VB
BRIBE NN VB
BRIBERY NN
BRIBES NNS
BRIBING VBG
Bricklayers NNPS
BRICKLAYERS NNPS
BRICK NN NNP
BRICKS NNS
BRICKTOP NNP
BRIDE NN
BRIDESHEAD NNP
bridge NN JJ VB
Bridge NNP NN
BRIDGE NNP NN JJ VB
BRIDGEPORT NNP
BRIDGERS NNP
Bridges NNPS NNP
BRIDGES NNS NNP NNPS
BRIDGESTONE\/FIRESTONE NNP
BRIDGET NNP
BRIDGEVILLE NNP
BRIDGING VBG
BRIEFCASE NN
BRIEFCASES NNS
briefed VBN VBD
BRIEFED VBN VBD
briefing NN
BRIEFING NN
BRIEFINGS NNS
brief JJ NN VB
BRIEF JJ NN VB NNP
briefly NN RB
BRIEFLY NN RB
Brief NNP NN
BRIEFS NNS NNPS
BRIE NN
BRIERLEY NNP
BRIGADE NN NNP
BRIGADES NNS
BRIGGS NNP
BRIGHAM NNP
brightened VBD VBN
BRIGHTENED VBD VBN
BRIGHTENING VBG
brighter JJR
BRIGHTER JJR
brightest JJS
BRIGHTEST JJS
bright JJ
BRIGHT JJ NNP
BRIGHTLY RB
BRIGHTMAN NNP
Bright NNP JJ
BRIKSA NNP
BRILLIANCE NN
brilliant JJ
BRILLIANT JJ
BRILLIANTLY RB
brimmed VBD
BRIMMED VBD
BRIM NN
BRIMSTONE NN
BRINE NN
bringing VBG NN
BRINGING VBG NN
brings VBZ
BRINGS VBZ
bring VB VBP
BRING VB VBP
BRINKMAN NNP
BRINK NN NNP
BRINKSMANSHIP NN
BRISCOE NNP
brisker JJR
BRISKER JJR
brisk JJ
Brisk JJ
BRISK JJ
BRISKLY RB
BRISSETTE NNP
bristled VBD
BRISTLED VBD
bristles VBZ
BRISTLES VBZ
bristle VBP
BRISTLE VBP
BRISTOL-MEYERS NNP
BRISTOL-MYERS NNP
BRISTOL NNP
BRITAIN NNP
BRITANNIA NNP
British-based JJ
BRITISH-BASED JJ
British-born JJ
BRITISH-BORN JJ
BRITISH JJ
British JJ NNP NNPS NNS
BRITISH JJ NNP NNPS NNS
British-owned JJ
BRITISH-OWNED JJ
BRITOIL NNP
Briton NN
BRITON NN
BRITTA NNP
brittle JJ
BRITTLE JJ
BRITTON NNP
BRITTO NNP
BRIZOLA NNP
BROAD-BASED JJ
BROADBEACH NNP
BROADCASTER NN
Broadcasters NNS NNPS
BROADCASTERS NNS NNPS
BROADCASTING NNP NN VBG
Broadcasting NNP VBG
broadcasting NN VBG
BROADCAST NN VBN NNP VB VBD
broadcast NN VBN VB VBD
Broadcasts NNS
broadcasts NNS VBZ
BROADCASTS NNS VBZ
broadened VBD VBN
BROADENED VBD VBN
BROADENING VBG
broadens VBZ
BROADENS VBZ
broaden VB
BROADEN VB
BROADER-BASED JJ
broader JJR
Broader JJR
BROADER JJR
broadest JJS
BROADEST JJS
broad JJ
BROAD JJ NNP
BROADLY RB
Broad NNP JJ
BROAD-SCALE JJ
BROADSIDE NN
BROADSTAR NNP
BROADWAY NNP
BROBERG NNP
BROCHURE NN
BROCHURES NNS
BROCKVILLE NNP
BRODERICK NNP
BRODER NNP
BRODY NNP
Broiler NN
BROILER NN
BROKEN-DOWN JJ
Broken NNP JJ
broken VBN JJ
BROKEN VBN JJ NNP
brokerage-house NN
BROKERAGE-HOUSE NN
BROKERAGE NN
Brokerage NN NNP
BROKERAGE NN NNP
BROKERAGES NNS
broker-dealer JJ NN|JJ NN
BROKER-DEALER JJ NN|JJ NN
broker-dealers NNS
BROKER-DEALERS NNS
brokered JJ VBD
BROKERED JJ VBD
brokering VBG NN
BROKERING VBG NN
BROKER NN NNP
Brokers NNS NNPS
BROKERS NNS NNPS
BROKER-SOLD JJ
BROKE VBD JJ RB
broke VBD RB JJ
BROMLEY NNP
BROMWICH NNP
BRONCES NNP
BRONCO NNP
Broncos NNS
BRONCOS NNS
BRONCS NNS
BRONFMAN NNP
BRONFMANS NNP
BRONISLAVA NNP
BRONNER NNP
BRONSON NNP
BRONSTON NNP
BRONX NNP
BRONZE NN
BROOCH NN
BROOD NN
BROOKE NNP
BROOKINGS NNP
BROOKLINE NNP
BROOKLYN NNP
BROOK NNP
BROOKS NNP
BROPHY NNP
Bros NNP NNPS
Bros. NNP NNPS
BROS NNP NNPS
BROS. NNP NNPS
BROTHERHOOD NNP
brother-in-law NN
BROTHER-IN-LAW NN
BROTHERISM NN
brotherly JJ
BROTHERLY JJ
BROTHER NN
Brothers NNPS NNP
BROTHERS NNPS NNP NNS
BROTH NN
brought VBN VBD
BROUGHT VBN VBD
BROUHAHA NN
BROUWER NNP
BROWARD NNP
brow-beating NN
BROW-BEATING NN
browbeat VB
BROWBEAT VB
BROWDER NNP
BROWNELL NNP
BROWNE NNP
BROWN-FORMAN NNP
BROWNING NNP
brown JJ
BROW NN
Brown NNP JJ
BROWN NNP JJ
Browns NNP NNPS
BROWNS NNP NNPS
BROWNSTEIN NNP
Brown-tobacco JJ
BROWN-TOBACCO JJ
browse VB
BROWSE VB
BROWSING NN VBG
browsing VBG NN
BROZMAN NNP
BRUCE NNP
BRUCH NNP
BRUCKHEIMER NNP
bruddah FW
BRUDDAH FW
bruised VBN
BRUISED VBN
BRUISES NNS
bruising JJ VBG
BRUISING JJ VBG
BRUNCH NN
BRUNDTLAND NNP
BRUNEI NNP
BRUNELLO NNP
BRUNER NNP
BRUNO NNP
BRUNSDON NNP
BRUNSWICK NNP
BRUNSWIG NNP
BRUNT NN
BRUSHBACKS NNS
brushed VBD VBN
BRUSHED VBD VBN
BRUSHES NNS
BRUSHING VBG
BRUSH NN NNP VB
brush NN VB
BRUSHOFF NN
Brussels NNP NNS
BRUSSELS NNP NNS
BRUTALITY NN
brutal JJ
BRUTAL JJ
BRUTALLY RB
brute JJ
BRUTE JJ
brutish JJ
BRUTISH JJ
BRUWER NNP
BRUYETTE NNP
BRYAN NNP
BRYANT NNP
BRYNER NNP
BSB NNP
BSN NNP
b SYM LS NN
B\/T NNP
BT NNP
BTR NNP
bubblelike JJ
BUBBLELIKE JJ
bubble NN VB
BUBBLE NN VB
BUBBLES NNS
BUCARAMANGA NNP
Buccaneers NNS
BUCCANEERS NNS
BUCHANAN NNP
BUCHNER NNP
BUCHWALD NNP
bucked VBD VBN
BUCKED VBD VBN
BUCKERIDGE NNP
BUCKET NN
BUCKETS NNS
BUCKHEAD NNP
BUCKINGHAM NNP
Bucking VBG
BUCKING VBG
buckled JJ VBD
BUCKLED JJ VBD
BUCKLES NNP
buckle VB NN
BUCKLE VB NN
BUCKLEY NNP
BUCKLING VBG
BUCKNELL NNP
BUCK NN NNP VB VBP
buck NN VBP VB
BUCKSHOT NN
bucks NNS VBZ
BUCKS NNS VBZ
Budapest NNP JJS
BUDAPEST NNP JJS
BUDDHA NNP
BUDDIES NNS
budding VBG JJ
BUDDING VBG JJ
BUDDY NNP NN
budged VBN VBD
BUDGED VBN VBD
BUDGETARY JJ
budget-cutting NN
BUDGET-CUTTING NN
budgeted VBN
BUDGETED VBN
BUDGETEERS NNS
budgeting NN
BUDGETING NN NNP
BUDGET NN NNP
Budget NNP NN
BUDGET-PRICED JJ
BUDGET-RECONCILIATION JJ
BUDGET-REDUCTION JJ
BUDGETS NNS
budge VB
BUDGE VB
BUD NNP
BUDS NNS
BUDWEISER NNP
BUEKY NNP
BUELL NNP
BUENTE NNP
BUFFALO NNP
buffer NN VB
BUFFER NN VB
buffeted VBN
BUFFETED VBN
buffet NN VB
BUFFET NN VB
Buffets NNS
BUFFETS NNS
buffetting NN
BUFFETTING NN
BUFFETT NNP
BUFFING VBG
BUFFS NNS
BUFTON NNP
BUGABOO NN
bugged VBN
BUGGED VBN
bugging NN
BUGGING NN
BUGLESS JJ
buglike JJ
BUGLIKE JJ
Bug NN
BUG NN
Bugs NNP NNS
BUGS NNS NNP
BUHRMANN-TETTERODE NNP
BUICK NNP
BUILDER NN
Builders NNPS NNS NNP
BUILDERS NNS NNPS NNP
building-materials NNS
BUILDING-MATERIALS NNS
Building NNP NN VBG
building NN VBG
BUILDING NN VBG NNP
building-products NNS
BUILDING-PRODUCTS NNS
BUILDING-RELATED JJ
Buildings NNS
BUILDINGS NNS
BUILDING-SOCIETY JJ
builds VBZ
BUILDS VBZ
build-up NN
BUILD-UP NN
BUILDUP NN
build VB VBP VBN
BUILD VB VBP VBN
BUILT-FROM-KIT JJ
built-in JJ NN
BUILT-IN JJ NN
Built VBN
built VBN VBD
BUILT VBN VBD
BUKSBAUM NNP
BULB NN
BULBS NNS
Bulgarian JJ NNP
BULGARIAN JJ NNP
BULGARIA NNP
Bulgarians NNPS
BULGARIANS NNPS
BULGING VBG
bulk-chemical JJ NN|JJ
BULK-CHEMICAL NN|JJ JJ
BULKED-UP JJ
BULKHEADS NNS
bulk-mail NN
BULK-MAIL NN
bulk NN JJ
BULK NN JJ
bulky JJ
BULKY JJ
bulldozed VBN
BULLDOZED VBN
BULLDOZER NN
BULLDOZERS NNS
BULLETIN NN NNP
BULLETINS NNS
BULLET NN
BULLET-PROOF JJ
BULLETS NNS
BULLFIGHTER NN
BULLHORN NN
BULLHORNS NNS
bullied VBD
BULLIED VBD
bullies VBZ
BULLIES VBZ
BULLION NN NNP
bullish JJ
Bullish JJ
BULLISH JJ
BULLISHLY RB
bullishness NN
BULLISHNESS NN
bull-market NN
BULL-MARKET NN
BULL NNP NN
BULLOCK NNP NN
BULLOCKS NNP
Bulls NNPS NNS
BULLS NNS NNPS
BULLYING VBG
bully NN
BULLY NN
BULSECO NNP
BULWARK NN
bumble VB VBP
BUMBLE VB VBP
BUMBLING VBG
BUMIPUTRA NNP
BUMKINS NNP
BUM NNP
BUMPED VBD VBN
bumped VBN VBD
BUMPER NN
BUMPERS NNP
BUMPER-TO-BUMPER JJ
bump NN VB
BUMPS NNS
BUMP VB NN
bumpy JJ
BUMPY JJ
Bums NNS
BUMS NNS
BUNCHES NNS
BUNCH NN
BUNCO NN
BUNDESBANK NNP
bundled VBN
BUNDLED VBN
BUNDLE NN
BUNDLES NNS
BUNDLING VBG
Bund NN
BUND NN
BUNDY NNP
BUNDY'S NNP
bungled VBN
BUNGLED VBN
BUNKER NNP
bunko-forgery NN
BUNKO-FORGERY NN
BUNNY NN NNP
BUNS NNS
BUNTING NNP
BUNT NN
BUOYANCY NN
buoyant JJ
BUOYANT JJ
Buoyed VBN
buoyed VBN VBD
BUOYED VBN VBD
BUOYING VBG
buoys VBZ
BUOYS VBZ
buoy VB
BUOY VB
BURBANK NNP
burbles VBZ
BURBLES VBZ
BURCHETTE NNP
BURCH NNP
burdened VBN VBD
BURDENED VBN VBD
BURDEN NN
burden-sharing NN
BURDEN-SHARING NN
Burdens NNS
burdens NNS VBZ
BURDENS NNS VBZ
burdensome JJ
BURDENSOME JJ
BURDETT NNP
BUREACRATIC JJ
BUREAUCRACIES NNS
BUREAUCRACY NN
BUREAUCRATIC JJ
Bureaucrat NN
BUREAUCRAT NN
Bureaucrats NNS
BUREAUCRATS NNS
BUREAU NNP NN
BUREAUS NN NNP NNS NNPS
bureaus NN NNS
Bureaus NNPS NNP
BUREAU-SPONSORED JJ
BURFORD NNP
BURGEE NNP
BURGE NNP
BURGEONING VBG
BURGER NNP NN
BURGERS NNS
BURGESS NNP
BURGLARIES NNS
burglarized VBN
BURGLARIZED VBN
burglary NN
BURGLARY NN
BURGS NNS
Burgundies NNPS
BURGUNDIES NNPS
BURGUNDY NNP
BURIAL NN
BURIALS NNS
Buried VBN
buried VBN VBD
BURIED VBN VBD
BURKE NNP
BURKINA NNP
BURK NNP
BURLAP NN
burlesque JJ
BURLESQUE JJ
BURLINGAME NNP
BURLINGTON NNP
burly JJ
BURLY JJ
BURMAH NNP
BURNAND NNP
Burned VBN
burned VBN VBD JJ
BURNED VBN VBD JJ
BURNER NN
BURNHAM NNP
Burning NN
burning NN VBG
BURNING NN VBG
BURNISHING VBG
BURNOUT NN
BURNOUTS NNS
BURNS NNP NNS VBZ
burns NNS VBZ
BURNSVILLE NNP
burnt JJ VBN
BURNT JJ VBN
burn VB VBP
BURN VB VBP
BURRILLVILLE NNP
BURR NNP
BURROUGHS NNP
BURRY NNP
BURSTING VBG
burst NN VBP VBD
BURST NN VBP VBD
bursts NNS VBZ
BURSTS NNS VBZ
BURT NNP
BURTON NNP
BURYING VBG
BURY VBP VB
bury VB VBP
BURZON NNP
BUSCH NNP
BUSES NNS
BUSEY NNP
BUSHEL NN
BUSHELS NNS
BUSHES NNS
BUSH NNP
bushy JJ
BUSHY JJ
busier JJR
BUSIER JJR
BUSIES NNS
busiest JJS
BUSIEST JJS
BUSILY RB
BUSINESS-AS-USUAL JJ
BUSINESS-CLASS JJ
business-communications NNS
BUSINESS-COMMUNICATIONS NNS
Businesses NNS
BUSINESSES NNS
BUSINESS-INTERRUPTION JJ
business-judgment NN
BUSINESS-JUDGMENT NN
BUSINESSLAND NNP
businesslike JJ
BUSINESS-LIKE JJ
BUSINESSLIKE JJ
business-machines NNS
BUSINESS-MACHINES NNS
BUSINESSMAN NN
businessmen NNS
Businessmen NNS
BUSINESSMEN NNS
business NN
BUSINESS NN NNP
Business NNP NN
business-partners NNS
BUSINESS-PARTNERS NNS
BUSINESSPEOPLE NN
BUSINESS-RELATED JJ
BUSINESS-TELEPHONE JJ
business-to-business NN JJ
BUSINESS-TO-BUSINESS NN JJ
BUSINESS-VENTURE JJ
BUSINESSWOMAN NN
BUSLOAD NN
BUSLOADS NNS
bus NN
Bus NN NNP
BUS NN NNP
BUSSIERES NNP
busted JJ VBN VBD
BUSTED VBD JJ VBN
BUSTER NN NNP
BUSTING VBG
BUSTLE NN
bustling JJ
BUSTLING JJ
BUST NN
BUSTS NNS
busy JJ
BUSY JJ
Butane NN
BUTANE NN
But CC IN NNP
but CC IN RB
BUT CC IN RB NNP
BUTCHER NN NNP
BUTCH NNP
BUTLER NNP NN
BUTLERS NNS
BUTOWSKY NNP
BUTTE NNP
BUTTERFAT NN
BUTTERFINGER NNP
BUTTERFLIES NNS
butterfly NN
BUTTERFLY NN
BUTTER NN
BUTTER-NUT NNP
butt NN VB
BUTT NN VB
BUTTONED-DOWN JJ
BUTTONED-UP JJ
BUTTON NN
BUTTONS NNS
buttressed VBN
BUTTRESSED VBN
buttresses VBZ
BUTTRESSES VBZ
buttress VB
BUTTRESS VB
BUTZ NNP
buy-and-hold JJ CD
BUY-AND-HOLD JJ CD
BUYBACK JJ NN
buyback NN JJ
buy-back NN JJ VB
BUY-BACK NN JJ VB
buy-backs NNS
BUY-BACKS NNS
BUYER NN NNP
Buyers NNS
BUYERS NNS
buy\/hold JJ
BUY\/HOLD JJ
BUYINGS NNS
buying VBG NN JJ
Buying VBG NN NNP
BUYING VBG NN NNP JJ
BUY-NOW JJ
Buy-out NN
BUY-OUT NN
BUYOUT NN
buy-out NN JJ
BUY-OUT NN JJ
buy-outs NNS
BUY-OUTS NNS
BUYOUTS NNS
BUY-SELL JJ
BUY-STOP JJ
buys VBZ NNS
BUYS VBZ NNS
Buy VB JJ
buy VB VBP NN JJ VB|NN
BUY VB VBP NN JJ VB|NN
BUZZELL NNP
BUZZER NN
buzzes VBZ
BUZZES VBZ
BUZZING VBG
buzz NN VB JJ
BUZZ NN VB JJ
BUZZSAW NN
BUZZWORD NN
BUZZWORDS NNS
BUZZY NNP
B.V. NNP
BV NNP
BYELORUSSIA NNP
bygone JJ
BYGONE JJ
By IN RB NNP
by IN RB RP
BY IN RB RP NNP
BYLAWS NNS
BYLER NNP
BYLINES NNS
BYNOE NNP
bypass VB NN
BYPASS VB NN
BYRD NNP
BYRNE NNP
BYRON NNP
BYRUM NNP
BYSTANDERS NNS
byzantine JJ
Byzantine JJ
BYZANTINE JJ
C$ $
C-12 NN
C-130 NN
C-17 NN NNP
C-17 NNP NN
C-5B NN
C-90 NN
CAAC NNP
Caa NNP JJ
CAA NNP JJ
CABAL NN
CABANNE NNP
CABBAGE NNP
CABERNET NNP
Cabernets NNPS
CABERNETS NNPS
cabin-crew NNS
CABIN-CREW NNS
CABINET-LEVEL JJ
CABINET NN NNP
CABINETS NNS
cable NN
CABLE NN NNP
CABLE-PROGRAMMING JJ
CABLES NNS
CABLE-TELEVISION-EQUIPPED JJ
cable-television NN
CABLE-TELEVISION NN
cable-TV NN
CABLE-TV NN
cable-TV-system NN
CABLE-TV-SYSTEM NN
CABLEVISION NNP
CAB NN NNP
CABRERA NNP
CABS NNS
CACAO NNP
CACHE NN
CACHES NNS
CACHET NN
CACI NNP
CAC NNP
CACOPHONY NN
CADBURY NNP
CADBURY-SCHWEPPES NNP
CADDYSHACK NNP
CADET NN
CADETS NNS
cadge VBP
CADGE VBP
Cadillac NNP NN
CADILLAC NNP NN
CADMIUM NN
CADWELL NNP
CAE NNP
CAERE NNP
Caesarean JJ
CAESAREAN JJ
CAESARS NNP
CAFE NN NNP
CAFES NNS
CAFETERIA NN
CAFETERIAS NNS
CAFFEINE-FREE JJ
CAGE NN NNP
CAGLIARI NNP
CAHOON NNP
Cairenes NNPS
CAIRENES NNPS
Cairo NNP NN
CAIRO NNP NN
CAISSE NNP
CAITLIN NNP
caked VBD
CAKED VBD
CAKE NN
CALABASAS NNP
CALAMITIES NNS
CALAMITOUS JJ
CALAMITY NN
Calaveras NNS
CALAVERAS NNS
CALCIUM NN
Calculated VBN
calculated VBN JJ VBD
CALCULATED VBN JJ VBD
calculates VBZ
CALCULATES VBZ
calculate VB VBP
CALCULATE VB VBP
Calculating VBG
CALCULATING VBG
CALCULATION NN
CALCULATIONS NNS
CALCULATOR NN
CALCULATORS NNS
CALCULATOR-TOTING JJ
CALDER NNP
CALDERWOOD NNP
CALDOR NNP
CALDWELL NNP
CALEB NNP
CALENDAR NN
CALFED NNP
Calgary-based JJ
CALGARY-BASED JJ
CALGARY NNP
CALGENE NNP
CALGON NNP
calibrated VBN
CALIBRATED VBN
Calif.-based JJ
CALIF.-BASED JJ
CALIF NNP
CALIF. NNP
California-backed JJ
CALIFORNIA-BACKED JJ
California-based JJ
CALIFORNIA-BASED JJ
California-bashing JJ
CALIFORNIA-BASHING JJ
Californian NN
CALIFORNIAN NN
California NNP JJ
CALIFORNIA NNP JJ
Californians NNPS NNS
CALIFORNIANS NNPS NNS
CALISTO NNP
Callable JJ
CALLABLE JJ
CALLAS NNP
CALLED VBN
Called VBN VBD
called VBN VBD VB
CALLED VBN VBD VB
CALLENDER NNP
CALLER NN
Callers NNS
CALLERS NNS
Calling VBG
calling VBG NN
CALLING VBG NN
Call-In NN
CALL-IN NN
CALLIOPE NNP
callipygous NN
CALLIPYGOUS NN
CALL JJ NNP NN NN|JJ VB
call NN VB VBP JJ
CALL NN VB VBP JJ NNP NN|JJ
CALLOWAY NNP
CALLS NNPS
Calls NNS
calls VBZ NNS
CALLS VBZ NNS NNPS
CALLUM NNP
Call VB NNP NN
CalMat NNP NN
CALMAT NNP NN
calmed VBN
CALMED VBN
calmer JJR
CALMER JJR
calming JJ VBG
CALMING JJ VBG
CALMLY RB
calmness NN
CALMNESS NN
calm VB JJ NN
CALM VB JJ NN
CALORIES NNS
CALOR NNP
CALTECH NNP
Caltrans NNP NNS
CALTRANS NNP NNS
CALVERLEY NNP
CALVERT NNP
CALVES NNS
CALVI NNP
CAMARADERIE NN
CAMARO-FIREBIRD NNP
CAMARO NNP
Cambodian JJ
CAMBODIAN JJ
CAMBODIA NNP
Cambodians NNPS
CAMBODIANS NNPS
CAMBREX NNP
CAMBRIAN NNP
CAMBRIA NNP
CAMBRIDGE NNP
ca MD
CAMDEN NNP
Ca MD NNP JJ
CA MD NNP JJ
CAMEL NNP
CAMEO NN
Camera NN NNP
CAMERA NN NNP
CAMERAS NNS
CAMERINO NNP
came VBD
CAME VBD
CAMILLE NNP
CAMILLI NNP
CAMILO NNP
CAMMACK NNP
camouflaged VBN
CAMOUFLAGED VBN
CAMOUFLAGE NN
campaigned VBN
CAMPAIGNED VBN
CAMPAIGNER NN
campaigning NN VBG
CAMPAIGNING NN VBG
CAMPAIGN NN NNP VB
Campaign NNP NN
campaign NN VB
CAMPAIGNS NNS
CAMPANERIS NNP
CAMPBELL-MITHUN-ESTY NNP
CAMPBELL-MITHUN NNP
CAMPBELL NNP
Campeau NNP NN
CAMPEAU NNP NN
Campeau-related JJ
CAMPEAU-RELATED JJ
camped VBD
CAMPED VBD
CAMPERS NNS
CAMPFIRE NN
CAMPION NNP
CAMP NN NNP
CAMPO NNP
CAMPS NNS
Campuses NNS
CAMPUSES NNS
campus NN
CAMPUS NN
CAMRY NNP
Camrys NNPS
CAMRYS NNPS
CANAAN NNP
CANADA NNP
CANADA-U.S. NNP
Canadian-dollar JJ
CANADIAN-DOLLAR JJ
CANADIAN JJ
Canadian JJ NNP NN
CANADIAN JJ NNP NN
Canadians NNPS
CANADIANS NNPS
Canadian-U.S. JJ
CANADIAN-U.S. JJ
CANAL NN NNP
CANALS NNS
CANANEA NNP
CANARY-COLORED JJ
CANAVERAL NNP
CANBERRA NNP
CANCELED VBN VBD JJ VBN|JJ
canceled VBN VBD VBN|JJ JJ
CANCELING VBG
CANCELLATION NN
CANCELLATIONS NNS
cancels VBZ
CANCELS VBZ
cancel VB NN
CANCEL VB NN
CANCER-CAUSING JJ
CANCER-GENE JJ
CANCER NN NNP
Cancer NNP NN
CANCEROUS JJ
CANCER-RELATED JJ
CANCERS NNS
CANCER-SUPPRESSING JJ
cancer-suppressors NNS
CANCER-SUPPRESSORS NNS
CANCER-SUSCEPTIBLE JJ
CANDACE NNP
CANDELA NNP
CANDICE NNP
CANDIDACY NN
CANDIDATE NN
CANDIDATES NNS
candid JJ
Candid JJ NNP
CANDID JJ NNP
CANDIES NNS
CANDLELIGHT NN
CANDLES NNS
CANDLESTICK NNP
CANDOR NN
CANDU NNP
CANDYBAR NN
Candy NN
CANDY NN
CANELLOS NNP
CANELO NNP
CANE NNP NN
CANEPA NNP
canine JJ
CANINE JJ
CANION NNP
Can MD
can MD NN
CAN MD NN
canned JJ VBN
CANNED JJ VBN
CANNELL NNP
CANNER NNP
CANNES NNP
canning NN VBG
CANNING NN VBG
CANNON NNP NN
CA. NNP
canny JJ
CANNY JJ
CANOGA NNP
CANONIE NNP
CANON NNP
CANO NNP
CANS NNS
CANTER NNP
CANT NN
CANTOBANK NNP
cantonal JJ
CANTONAL JJ
CANTO NN
CANTON NNP
CANTOR NNP
CANVASES NNS
canvas NN
CANVAS NN
canvassed VBN
CANVASSED VBN
CANYON NNP
CANYONS NNS
CAPABILITIES NNS
CAPABILITY NN
CAPABLE JJ
CAPACITIES NNS
CAPACITORS NNS NNP
capacity-expansion JJ NN
CAPACITY-EXPANSION NN JJ
CAPACITY NN
CAPCOM NNP
CAPEL NNP
CAPE NNP
CAPETRONIC NNP
CAPISTRANO NNP
capital-assets NNS
CAPITAL-ASSETS NNS
CAPITAL-BOOSTING JJ
capital-draining VBG
CAPITAL-DRAINING VBG
capital-formation NN
CAPITAL-FORMATION NN
CAPITAL-GAINS-CUT JJ
CAPITALGAINS NNS
capital-gains NNS JJ NN
CAPITAL-GAINS NNS JJ NN
capital-goods NNS
CAPITAL-GOODS NNS
capital-improvement NN
CAPITAL-IMPROVEMENT NN
Capitalism NN
CAPITALISM NN
CAPITALIST-EXPLOITERS-GREEDY-AMERICAN-CONSUMERS-GLOBAL JJ
CAPITALISTIC JJ
capitalist JJ NN
CAPITALIST JJ NN
Capitalists NNPS
CAPITALISTS NNS NNPS
CAPITALIZATION NN
capitalized VBN JJ VBD
CAPITALIZED VBN JJ VBD
capitalize VB
CAPITALIZE VB
Capitalizing VBG
CAPITALIZING VBG
CAPITAL-MARKET JJ
CAPITAL-MARKETS JJ
capital NN JJ
CAPITAL NN NNP
CAPITAL NN NNP JJ
Capital NNP NN
capital-punishment NN
CAPITAL-PUNISHMENT NN
CAPITAL-RAISING JJ
CAPITALS NNS
capital-spending JJ NN
CAPITAL-SPENDING NN JJ
capital-to-asset JJ NN
CAPITAL-TO-ASSET NN JJ
capital-to-assets NNS
CAPITAL-TO-ASSETS NNS
capita NN NNS
CAPITA NN NNS
Capitol NNP NN
CAPITOL NNP NN
capitulated VBD
CAPITULATED VBD
CAP NN NNP VB VBP
cap NN VBP VB
CAPOTEN NNP
CAPOTE NNP
capped VBD VBN JJ
CAPPED VBD VBN JJ
CAPPING VBG
CAPRA NNP
CAPRICE NNP
CAPRICIOUS JJ
CAPRICIOUSLY RB
capriciousness NN
CAPRICIOUSNESS NN
CAPRI NNP
CAPS NNS
CAPSULES NNS
captain NN VBP
CAPTAIN NN VBP
captioned VBD
CAPTIONED VBD
captivating JJ VBG
CAPTIVATING JJ VBG
CAPTIVE JJ NN
captive NN JJ
CAPTIVES NNS
CAPT. NNP
CAPTURED VBN VBD VBN|JJ
captured VBN VBN|JJ VBD
capture VB NN
CAPTURE VB NN
CAPTURING VBG
CARACAS NNP
CARA NNP
CARAT NNP NN
CARATS NNS
CARBALLO NNP
CARBIDE NNP
carbide-products NNS
CARBIDE-PRODUCTS NNS
carbon-dioxide NN
CARBON-DIOXIDE NN
CARBONI NNP
CARBON NN NNP
CAR-CARE JJ
carcass NN
CARCASS NN
CARCINOGENIC JJ
CARCINOGEN NN
CAR-CRASH JJ
CARDBOARD NN
CARD-CARRYING JJ
car-dealers NNS
CAR-DEALERS NNS
CARDENAS NNP
CARDER NNP
car-development NN
CAR-DEVELOPMENT NN
CARDHOLDERS NNS
CARDIAC-DRUG JJ
cardiac JJ
CARDIAC JJ NNP
CARDIFF NNP
CARDIGAN NN
CARDILLO NNP
CARDINAL NNP
Cardinals NNPS
CARDINALS NNS NNPS
CARDIN NNP
cardiovascular JJ
CARDIOVASCULAR JJ NNP
card-member NN
CARD-MEMBER NN
CARD NN NNP
Card NNP NN
CARDS NNS NNP
cared VBD VBN
CARED VBD VBN
careened VBD
CAREENED VBD
CAREENING VBG
careen VB
CAREEN VB
CAREER NN NNP
CAREER-RISKING JJ
Careers NNS
CAREERS NNS
carefree JJ
CAREFREE JJ
CAREFUL JJ
CAREFULLY RB
CARELESS JJ
CARE NN NNP VB VBP
Care NNP NN
care NN VB VBP
cares VBZ
CARES VBZ
CARETAKER NN
CARE-UNIT NNP
CAREW NNP
Carews NNPS
CAREWS NNPS
CAREY NNP
CARGILL NNP
CARGO NN
CAR-HAPPY JJ
Caribbean NNP JJ
CARIBBEAN NNP JJ
CARIBOU NN
CARICATURES NNS
caricature VB
CARICATURE VB
CARILLONS NNS
CARING VBG JJ NN
caring VBG NN JJ
CARISBROOK NNP
CARLA NNP
car-leasing NN
CAR-LEASING NN
CARLETON NNP
CARL NNP
CARLOS NNP
CARLSON NNP
CARLTA NNP
CARLTON NNP
Carltons NNPS
CARLTONS NNPS
CARLUCCI NNP
CARLYLE NNP
car-market NN
CAR-MARKET NN
Carmelite JJ
CARMELITE JJ
CARMEL NNP
CARMEN NNP
CARMICHAEL NNP
CARMINE NNP
CARMON NNP
CARNAGE NN
CARNEGIE-MELLON NNP
CARNEGIE NNP
CARNEY NNP
Carnival NNP NN
CARNIVAL NNP NN
CARNIVORES NNS
CAR NN NNP
Car NNP NN
CAROLE NNP
CAROLG NNP
CAROLINA NNP
Carolinas NNPS NNP
CAROLINAS NNPS NNP
CAROLINE NNP
Carolinians NNPS
CAROLINIANS NNPS
CAROL NNP
CAROLYN NNP
CAR-PARKING JJ
CARPENTER NNP NN
CARPENTERS NNS
CARPENTRY NN
CARPETBAGGERS NNS
carpeted VBD
CARPETED VBD
carpeting NN
CARPETING NN
CARPET NN
CARPETS NNS
carping NN
CARPING NN
carp NN VBP
CARP VBP NN
CARRE NNP
CAR-RENTAL JJ
carried VBD VBN
CARRIED VBD VBN
Carried VBN
CARRIER-BASED JJ
Carrier NN
CARRIER NN
Carriers NNP NNS NNPS
CARRIERS NNS NNP NNPS
carries VBZ
CARRIES VBZ
CARRINGTON NNP
CARRION NNP
CARR-LOWREY NNP
CARR NNP
CARROLL NNP
CARROT NN
carry-forward NN
CARRY-FORWARD NN
carry-forwards NNS
CARRY-FORWARDS NNS
CARRYFORWARDS NNS
Carrying VBG
carrying VBG NN
CARRYING VBG NN
carry VB VBP NN
CARRY VB VBP NNP NN
CAR-SAFETY JJ
Cars NNPS NNS
CARS NNS NNPS
CARSON NNP
CARSTENS NNP
carted VBD
CARTED VBD
CARTEL NN
CARTER NNP
CARTILAGE NN
CARTING VBG
cart NN VBP
CART NN VBP
CARTON NN
Cartons NNS
CARTONS NNS
Cartoonist NN
CARTOONIST NN
CARTOONISTS NNP NNS
CARTOON NN NNP
CARTOONS NNS
CARTRIDGE NN NNP
CARTRIDGES NNS
CARTS NNS
CARVAIN NNP
Carved JJ
carved VBN VBD
CARVED VBN VBD JJ
CARVER NNP
CARVERS NNS
carves VBZ
CARVES VBZ
carve VBP VB
CARVE VB VBP
CARVING VBG
CARYL NNP
CASABLANCA NNP
cascaded VBD
CASCADED VBD
CASCADE NNP NN
CASCADING JJ VBG
cascading VBG JJ
CASE-BY-CASE JJ
CASELOAD NN
CASELOADS NNS
CASE NN
CASE NN NNP
Case NNP NN
Cases NNS
cases NNS VBZ
CASES NNS VBZ
CASEY NNP
CASH-AND-STOCK JJ
CASH-DEFERRED JJ
cashed VBN VBD
CASHED VBN VBD
CASH-EQUIVALENT JJ
cash-flow JJ NN
CASH-FLOW JJ NN
CASH-FLUSH JJ
CASH-HUNGRY JJ
CASHIER NN
CASHING VBG
CASHIN NNP
CASH-INTEREST JJ
CASH-MANAGEMENT JJ
CASHMAN NNP
Cash NNP NN
cash NN VB
CASH NN VB NNP
CASH-OR-SHARES JJ
Cash-pressed JJ
CASH-PRESSED JJ
CASH-RICH JJ
cash-squeeze NN
CASH-SQUEEZE NN
CASH-STRAPPED JJ
cash-up-front NN
CASH-UP-FRONT NN
CASINGS NNS
casino-company NN
CASINO-COMPANY NN
CASINO NN NNP
Casino NNP NN
Casinos NNS
CASINOS NNS
CASKETS NNS
CASK NNP
CASPAR NNP
CASPI NNP
Caspita-brand JJ
CASPITA-BRAND JJ
CASPITA NNP
CASSATT NNP
CASSELL NNP
CASSETTE NN
CASSETTES NNS
CASSIM NNP
CASTANEDA NNP
CASTER NN
castigated VBN
CASTIGATED VBN
castigate VB
CASTIGATE VB
CASTIGATING VBG
CASTILLO NNP
CASTINGS NNS
casting VBG NN
CASTING VBG NN
cast-iron NN JJ
CAST-IRON NN JJ
castlelike JJ
CASTLE-LIKE JJ
CASTLELIKE JJ
CASTLEMAN NNP
CASTLE NNP NN
CASTLING VBG
cast NN VBD VBN VB
CAST NN VBN VBD VB
castor-oil NN
CASTOR-OIL NN
CASTPARTS NNP
CAST-PROOF JJ
Castro-led JJ
CASTRO-LED JJ
CASTROL NNP
CASTRO-MEDELLIN NNP
CASTRO NNP
casts VBZ
CASTS VBZ
Cast VBN
casual JJ
CASUAL JJ
CASUALLY RB
CASUALTIES NNS
CASUALTY-INSURANCE JJ
CASUALTY-LOSS JJ
CASUALTY NNP NN
CASUISTRY NN
CATACLYSMIC JJ
CATACLYSMS NNS
catalog-clothing-merchandiser NN
CATALOG-CLOTHING-MERCHANDISER NN
CATALOGING VBG
Catalog NN
CATALOG NN
CATALOGS NNS
CATALOGUE NN
CATALYST NN NNP
CATALYTIC JJ
CATAMARAN NN
CAT-AND-MOUSE JJ
CATANIA NNP
catapult VB VBP
CATAPULT VB VBP
CATARACT NN
Cataracts NNS
CATARACTS NNS
Catastrophe NN
CATASTROPHE NN
CATASTROPHES NNS
catastrophic-care NN
CATASTROPHIC-CARE NN
catastrophic-illness NN JJ
CATASTROPHIC-ILLNESS NN JJ
CATASTROPHIC JJ NNP
catbird JJ
CATBIRD JJ
Catch-22 NN
CATCH-22 NN
CATCHER NN
CATCHERS NNS
catches VBZ
CATCHES VBZ
Catching VBG
CATCHING VBG
catch-up NN
CATCH-UP NN
catch VB NN VBP
CATCH VB NN VBP
CATEGORICALLY RB
CATEGORIES NNS
categorized VBN
CATEGORIZED VBN
CATEGORY NN
catered VBD
CATERED VBD
CATERER NN
catering NN VBG
CATERING NN VBG
CATERPILLAR NNP
caters VBZ
CATERS VBZ NNP
cater VB VBP
CATER VB VBP
CATFISH NN NNS
CATFISH NNS
catharsis NN
CATHARSIS NN
CATHAY NNP
CATHCART NNP
Cathedral NNP NN
CATHEDRAL NNP NN
CATHERALL NNP
CATHERINE NNP
CATHETER NN
CATHETERS NNS
CATHLEEN NNP
CATHODE NN
cathode-ray NN
CATHODE-RAY NN
CATHODES NNS
Catholic-Jewish JJ
CATHOLIC-JEWISH JJ
Catholic NNP JJ
CATHOLIC NNP JJ
Catholics NNPS
CATHOLICS NNPS
CATHRYN NNP
CAT NNP NN
CATO NNP
CATS NNS
CATSUP NN
cattle NNS
Cattle NNS
CATTLE NNS
CATTOLICA NNP
CATTRALL NNP
CAUCUS NNP
caught VBN VBD
CAUGHT VBN VBD
caused VBN VBD
CAUSED VBN VBD
'cause IN
'Cause IN
'CAUSE IN
causes NNS VBZ
CAUSES NNS VBZ
CAUSE VB NN NNP VBP
cause VB NN VBP
CAUSING VBG
CAUSTIC JJ
CAUTIONARY JJ
cautioned VBD
CAUTIONED VBD
CAUTIONING VBG
Caution NN
caution NN VBP VB
CAUTION NN VBP VB
cautions VBZ
CAUTIONS VBZ
Cautious JJ
CAUTIOUS JJ
CAUTIOUSLY RB
cautiousness NN
CAUTIOUSNESS NN
cavalier JJ
CAVALIER JJ NNP
CAVEAT NN
CAVEATS NNS
caved VBD
CAVED VBD
cave-in NN
CAVE-IN NN
CAVENEE NNP
CAVE NNP
CAVERNOUS JJ
CAVES NNS
CAVIN-MORRIS NNP
CAWDRON NNP
CAWTHORN NNP
CAYGILL NNP
CAYMAN NNP
CAYNE NNP
CAY NNP
CBI NNP
C.B. NNP
CB NNP
CBOE NNP
CBOT NNP
CB-radio-style JJ
CB-RADIO-STYLE JJ
CBS NNP
CBS-owned JJ
CBS-OWNED JJ
CCD NNP
& CC SYM
CDA NNP
CDBG NNP
CDC NNP
CDL NNP
C&D NNP
CD NNP NN
CD-ROM NN
C.D.s NNS NNPS
C.D.S NNS NNPS
CDs NNS NNPS NNP
CDS NNS NNPS NNP
CDT NNP
CD-type JJ
CD-TYPE JJ
CDU NNP
CEASE-AND-DESIST JJ
ceased VBD VBN
CEASED VBD VBN
cease-fire NN
CEASE-FIRE NN
CEASEFIRE NN
CEASELESSLY RB
ceases VBZ
CEASES VBZ
cease VB VBP
CEASE VB VBP
CECCONI NNP
CECELIA NNP
CECIN NNP
CECO NNP
CEDAR NN NNP
CEDED VBD VBN
ceded VBN VBD
CEDERGREN NNP
cede VB
CEDE VB
CEDING VBG
CEDRIC NNP
CEFIRO NNP
ceiling NN
CEILING NN
CEILINGS NNS
CELANESE NNP
CELA NNP
celebrated JJ VBD
CELEBRATED JJ VBD
celebrates VBZ
CELEBRATES VBZ
celebrate VB VBP
CELEBRATE VB VBP
CELEBRATING VBG
CELEBRATION NN
CELEBRATIONS NNS
CELEBRITIES NNS
CELEBRITY NN NNP
CELICA NNP
CELIMENE NNP
CELLAR NN NNP
CELLARS NNP NNS
CELLISTS NNS
CELL NN
CELLS NNS
cellular JJ
CELLULAR JJ NNP
cellular-phone NN
CELLULAR-PHONE NN
cellular-telephone JJ NN
CELLULAR-TELEPHONE JJ NN
CELLULOIDS NNS
CELNICKER NNP
CELTONA NNP
cemented VBN
CEMENTED VBN
Cementing VBG
CEMENTING VBG
cement-makers NNS
CEMENT-MAKERS NNS
CEMENT-MIXING JJ
cement NN VB
CEMENT NN VB NNP
CEMENT-TRUCK JJ
CEMETERY NN NNP
Cemetery NNP NN
C.E. NNP
censored VBN
CENSORED VBN
Censorship NN
CENSORSHIP NN
censor VBP
CENSOR VBP
censured VBD
CENSURED VBD
census NN
CENSUS NNP NN
CENTEL NNP
CENTENARIANS NNS
CENTENARY JJ
centennial NN JJ
CENTENNIAL NN NNP JJ
center-aisle NN
CENTER-AISLE NN
CENTERBANK NNP
CENTERED VBD VBN
centered VBN VBD
CENTERFIELDER NN
CENTERING VBG
CENTERIOR NNP
center NN JJ VBP RB
CENTER NN NNP JJ VBP RB
Center NNP NN
CENTERPIECE NN
CENTER-RIGHT JJ
Centers NNPS NNP VBZ
centers NNS VBZ
CENTERS NNS VBZ NNPS NNP
CENTER-STAGE JJ
CENTER-VENTED JJ
CENTIMETER NN
CENTIMETERS NNS
CENT NN
CENTRALE NNP
CENTRALIZED JJ VBN
centralized VBN JJ
centralize VB
CENTRALIZE VB
central JJ NN
CENTRAL JJ NNP NN
CENTRALLY RB
Central NNP JJ
CENTRE NNP
centrifugal JJ
CENTRIFUGAL JJ
centrist JJ
CENTRIST JJ
CENTRONICS NNP
CENTRUM NNP
CENTRUST NNP
CENTS-A-SHARE JJ
CENTS-A-UNIT JJ
Cents NNS
CENTS NNS
CENTS-OFF JJ
CENTURIES NNS
CENTURION NNP
CENTURIONS NNS
CENTURY-FOX NNP
CENTURY NN NNP
Century NNP NN
CENTURY-OLD JJ
CEO NNP NN
CEOs NNS
CEOS NNS
CEPEDA NNP
CERAMIC JJ
Ceramics NNPS
CERAMICS NNS NNPS
Cereal NN
CEREAL NN
CEREALS NNS
cerebral JJ
CEREBRAL JJ
ceremonial JJ
CEREMONIAL JJ
CEREMONIES NNS
CEREMONY NN
CERF NNP
certain JJ
CERTAIN JJ NNP
Certainly RB
CERTAINLY RB
Certain NNP JJ
CERTAINTY NN
CERTIFICATE NN
certificate-of-need NN
CERTIFICATE-OF-NEED NN
Certificates NNP NNPS NNS
CERTIFICATES NNS NNPS
CERTIFICATES NNS NNPS NNP
CERTIFICATION NN
certified VBN JJ
CERTIFIED VBN JJ NNP
certify VB
CERTIFY VB
CERTIN NN
CERTS NNP
CERVANTES NNP
CERVICAL JJ
CERVIX NN
CESSATION NN
CESSNA NNP
CETUS NNP
CEZANNE NNP
CF6-6 NNP
CFC-11 NN
CFC-12 NN
CFC NNP
CFCs NNP NNS NNPS
CFCS NNP NNS NNPS
CFD NNP
CF NNP
CFTC NNP
CHABROL NNP
CHADHA NNP
chafed VBN
CHAFED VBN
chafe VBP
CHAFE VBP
CHAFIC NNP
CHAGRIN NN
CHAINED JJ
chain NN VBP
CHAIN NN VBP
chain-smoking NN
CHAIN-SMOKING NN
Chains NNS
CHAINS NNS
CHAIN-STORE JJ
CHAIRED VBD VBN
chaired VBN VBD
chairman-elect NN
CHAIRMAN-ELECT NN NNP
CHAIRMAN NN NNP
Chairman NNP NN
CHAIRMANSHIP NN
chairmen NNS
CHAIRMEN NNS
CHAIR NN
CHAIRPERSON NNP
chairs NNS VBZ
CHAIRS NNS VBZ
CHAISE NN
chalked VBN
CHALKED VBN
CHALKING VBG
CHALK NN
CHALLENGEABLE JJ
challenged VBN VBD
CHALLENGED VBN VBD
CHALLENGE NN VB NNP VBP
challenge NN VB VBP
CHALLENGER NNP
CHALLENGERS NNS
challenges NNS VBZ
CHALLENGES NNS VBZ
Challenges VBZ
challenging VBG JJ
CHALLENGING VBG JJ
CHALMERS NNP
CHAMBERLAIN NNP
CHAMBER NN NNP
Chambers NNP NNPS NNS
CHAMBERS NNP NNS NNPS
CHAMPAGNE NN NNP
Champagne NNP NN
Champagnes NNS
CHAMPAGNES NNS
championed VBD VBN
CHAMPIONED VBD VBN
CHAMPIONING VBG
CHAMPION NN NNP VBP JJ
champion NN VBP JJ
CHAMPIONSHIP NN NNP
CHAMPIONSHIPS NNS
CHAMPIONSHIP-TEAM JJ
CHAMPIONS NNS
CHAMP NN NNP
CHAMPS NNP NNS
CHANCELLOR NNP NN
chance NN VBP
CHANCE NN VBP
CHANCERY NNP
CHANCES NNS
CHANDELIER NN
CHANDELIERS NNS
CHANDLER NNP
CHANDRA NNP
CHANDROSS NNP
CHANEL NNP
CHANGED VBD VBN
changed VBN VBD JJ
CHANGED VBN VBD JJ
Change NNP VB
change NN VB VBP
CHANGE NN VB VBP NNP
CHANGEOVER NN
change-ringing NN
Change-ringing NN
CHANGE-RINGING NN
Changes NNS
changes NNS VBZ
CHANGES NNS VBZ
Changing VBG
changing VBG JJ NN
CHANGING VBG NN JJ
CHANGYI NNP
CHANGYONG NNP
channeled VBD
CHANNELED VBD
CHANNEL NNP NN VB VBP
channel NN VB VBP
CHANNELS NNS
CHANNEL-ZAPPING JJ
CHANNING NNP
CHAN NNP
Chans NNS
CHANS NNS
chanted VBD VBN
CHANTED VBD VBN
CHANTEUSE NN
CHANTILLY NNP
CHANTING VBG
CHANTS NNS
CHAO NNP
chaos NN
CHAOS NN NNP
CHAOTIC JJ
CHAPDELAINE NNP
CHAPIN NNP
CHAPLIN NNP
Chapman NNP NN
CHAPMAN NNP NN
CHAPS NNS
Chapter NN NNP
CHAPTER NN NNP
CHAPTERS NNS
Characteristically RB
CHARACTERISTICALLY RB
characteristic JJ NN
CHARACTERISTIC JJ NN
CHARACTERISTICS NNS
CHARACTERIZATION NN
characterized VBN VBD
CHARACTERIZED VBN VBD
characterizes VBZ
CHARACTERIZES VBZ
characterize VB VBP
CHARACTERIZE VB VBP
CHARACTERIZING VBG
CHARACTERLESS JJ
Character NN
CHARACTER NN
character-recognition NN
CHARACTER-RECOGNITION NN
Characters NNS
CHARACTERS NNS
CHAR-BROILED JJ
CHARDONNAY NNP
Chardonnays NNPS
CHARDONNAYS NNPS
CHARDON NNP
charged VBN VBD JJ
CHARGED VBN VBD JJ
charge NN VBP VB
CHARGE NN VBP VB NNP
charge-offs NNS
CHARGE-OFFS NNS
Chargers NNPS
CHARGERS NNPS
Charges NNS
charges NNS VBZ
CHARGES NNS VBZ
Charge VB NNP
charging VBG NN
CHARGING VBG NN
CHAR-GRILLED JJ
CHARISMA NNP NN
CHARISMATIC JJ
Charitable JJ
CHARITABLE JJ
Charities NNS NNPS
CHARITIES NNS NNPS
Charity NN
CHARITY NN
CHARLATAN NN
CHARLATANRY NN
CHARLATANS NNS
CHARLENE NNP
CHARLES NNP
Charlestonians NNS
CHARLESTONIANS NNS
CHARLESTON NNP
CHARLET NNP
CHARLIE NNP
CHARLOTTE NNP
CHARLOTTESVILLE NNP
CHARLS NNP
CHARLTON NNP
charming JJ
CHARMING JJ
CHARMINGLY RB
CHARM NN
charred VBN
CHARRED VBN
chartered JJ VBN VBD
CHARTERED JJ VBN VBD NNP
charter NN JJ
CHARTER NN NNP JJ
CHARTER-SHIPPING JJ
chart NN VB VBP
CHART NN VB VBP
charts NNS VBZ
CHARTS NNS VBZ
CHARTWELL NNP
CHARY JJ
chased VBD
CHASED VBD
CHASEMAN NNP
chase NN JJ VB
CHASE NNP NN VB JJ
CHASERS NNS
chasing VBG NN
CHASING VBG NN
chassis NN NNS
CHASSIS NN NNS
chaste JJ
CHASTE JJ
CHASTENED VBD VBN
chastened VBN VBD
CHASTISED VBD VBN
chastised VBN VBD
chastises VBZ
CHASTISES VBZ
CHATEAU NNP NN
CHATEAUVALLON NNP
CHATSET NNP
CHATSWORTH NNP
CHATTERJI NNP
CHATTER NN
CHATTING VBG
chat VB
CHAT VB
CHAUFFEUR-DRIVEN JJ
chauffeur NN VB
CHAUFFEUR NN VB
CHAUFFEURS NNS
CHAUSSON NNP
CHAUVINISM NN
CHAVANNE-KETIN NNP
cheapens VBZ
CHEAPENS VBZ
cheaper JJR RBR
CHEAPER JJR RBR
cheapest JJS
CHEAPEST JJS
Cheap JJ
cheap JJ NN RB
CHEAP JJ NN RB
CHEAPLY RB
CHEAP-SHOT JJ
CHEAP-TO-MAKE JJ
cheated VBD JJ
CHEATED VBD JJ
CHEATER NN
CHEATERS NNS
cheating NN VBG
CHEATING NN VBG
cheat VB VBP
CHEAT VB VBP
CHECCHI NNP
CHECKBOOK NN
CHECKBOOKS NNS
checked VBN VBD
CHECKED VBN VBD
CHECKING-ACCOUNT JJ
checking NN VBG
CHECKING NN VBG
CHECK-KITING JJ
check NN VB VBP
CHECK NN VB VBP NNP
CHECKOFF NN NNP
CHECKOUT NN
CHECKPOINTS NNS
CHECKROBOT NNP
checks NNS VBZ
CHECKS NNS VBZ
Check VB NNP
CHEEK NN
CHEEK-TO-CHEEK JJ
cheek-to-jowl RB
CHEEK-TO-JOWL RB
cheeky JJ
CHEEKY JJ
cheered VBD VBN
CHEERED VBD VBN
CHEERFULLY RB
CHEERING VBG
Cheerios NNPS
CHEERIOS NNPS
CHEERLEADER NN
CHEERLEADERS NNS
cheerleading NN
CHEERLEADING NN
CHEER NNP NN VB
cheer NN VB
CHEERS NNS NNP
cheery JJ
CHEERY JJ
CHEESE NN NNP
CHEESES NNS
cheesy JJ
CHEESY JJ
CHEETAH NN
CHEETHAM NNP
CHEEZ NNP
CHEF NN
CHEFS NNS
CHEIL NNP
Chekhovian JJ
CHEKHOVIAN JJ
CHEKHOV NNP
Chekovian JJ
CHEKOVIAN JJ
CHELICERATES NNS
CHEMEX NNP
CHEMFIX NNP
chemical-industry NN
CHEMICAL-INDUSTRY NN
CHEMICALLY RB
chemical NN JJ
Chemical NNP NN
CHEMICAL NNP NN JJ
chemicals-industry NN
CHEMICALS-INDUSTRY NN
Chemicals NNPS NNS NNP
CHEMICALS NNS NNP NNPS
chemical-weapons NNS
CHEMICAL-WEAPONS NNS
CHEMIST NN
CHEMISTRY NN NNP
CHEMISTS NNS
chemist-turned-entrepreneur NN
CHEMIST-TURNED-ENTREPRENEUR NN
CHEM NNP
CHEMPLUS NNP
CHENEVIX-TRENCH NNP
CHENEY NNP
CHENGDU NNP
CHENG NNP
CHENILLE NN
CHE NNP
cherished VBN JJ
CHERISHED VBN JJ
cherishes VBZ
CHERISHES VBZ
CHER NNP
CHERNOBYL NNP
Chernobyl-type JJ
CHERNOBYL-TYPE JJ
CHEROKEE NNP
CHERRIES NNS
CHERRY-FLAVORED JJ
cherry JJ NN
CHERRY NNP JJ NN
CHERUBS NNS
CHERYL NNP
CHESAPEAKE NNP
CHESEBROUGH-POND NNP
CHESLEY NNP
CHESSMAN NNP
chess NN
CHESS NN
CHESTER NNP
CHESTMAN NNP
CHEST NN
CHEST-SWELLING JJ
CHETTA NNP
CHEVENEMENT NNP
Chevrolet NNP NN
CHEVROLET NNP NN
Chevrolets NNPS
CHEVROLETS NNPS
CHEVRON NNP
CHEVY NNP
chewed VBD
CHEWED VBD
CHEWING VBG
CHEWS NNS
chew VB VBP
CHEW VB VBP
CHEX NNP
CHEZ NNP
CHIANG NNP
CHIAPPA NNP
CHIAT\/DAY\/MOJO NNP
Chiat\/Day NNP NN
CHIAT\/DAY NNP NN
CHIAT\ NNP
Chicagoans NNPS
CHICAGOANS NNPS
Chicago-area JJ
CHICAGO-AREA JJ
Chicago-based JJ
CHICAGO-BASED JJ
CHICAGO-HELSINKI NNP
CHICAGO-MANCHESTER NNP
CHICAGO-MONTREAL NNP
chicago NNP
CHICAGO NNP
CHICAGO-PARIS NNP
Chicago-style JJ
CHICAGO-STYLE JJ
CHICAGO-WARSAW NNP
CHICANERY NN
CHI-CHI JJ
CHIC JJ
CHICKEN-MUTILATING JJ
CHICKEN NN NNP
Chicken NNP NN
Chickens NNS
CHICKENS NNS
CHICO NNP
CHIDED VBD VBN
chided VBN VBD
chides VBZ
CHIDES VBZ
CHIEF JJ
chief JJ NN
CHIEF JJ NN NNP
CHIEFLY RB
Chief NNP NN JJ
Chiefs NNPS NNP
CHIEFS NNPS NNS NNP
CHIEN-MIN NNP
child-as-required-yuppie-possession NN
CHILD-AS-REQUIRED-YUPPIE-POSSESSION NN
child-care JJ NN
CHILD-CARE JJ NN
child-development NN
CHILD-DEVELOPMENT NN
CHILDHOOD NN
childish JJ
CHILDISH JJ
CHILD NN NNP
Child NNP NN
CHILD-PARENT JJ
Children NNP NNS
children NNS
CHILDREN NNS
CHILDREN NNS NNP
CHILD-SAFETY JJ
CHILDS NNP
Chilean JJ
CHILEAN JJ
CHILE NNP
chilled VBN
CHILLED VBN
chilling JJ VBG
CHILLING JJ VBG
CHILLINGLY RB
chill NN VB
CHILL NN VB NNP
chilly JJ
CHILLY JJ
CHILMARK NNP
CHILVER NNP
CHIMANBHAI NNP
CHIMERINE NNP
chimes VBZ
CHIMES VBZ
CHIMICLES NNP
CHIMNEY NN
CHIMNEYS NNS
CHIMPANZEES NNS
China-bound JJ
CHINA-BOUND JJ
CHINA NNP NN
CHINCHON NNP
CHINESE-AMERICAN NNP
Chinese-British JJ
CHINESE-BRITISH JJ
Chinese JJ NNP NNPS NN NNS
CHINESE JJ NNP NNPS NN NNS
CHINLESS JJ
CHIN NN NNP
CHINN NNP
CHI NNP
CHINO NNP
CHIODO NNP
CHIPELLO NNP
Chipmunks NNPS
CHIPMUNKS NNPS
Chip NN NNP
CHIP NN NNP
chipped VBN
CHIPPED VBN
CHIPPING VBG
Chips NNPS NNP
CHIPS NNS NNP NNPS
CHIRAC NNP
CHIRIQUI NNP
CHIRON NNP
chirpy JJ
CHIRPY JJ
chisel VB
CHISEL VB
CHISHOLM NNP
CHIT NN
CHIUSANO NNP
CHIVAS NNP
CHLORAZEPATE NN
CHLORIDE NN
CHLORINE NN
CHLOROFLUOROCARBONS NNS
chocolate NN JJ
CHOCOLATE NN JJ
choice NN JJ
CHOICE NN JJ NNP
Choice NN NNP
Choices NNS
CHOICES NNS
CHOIR NN
CHOJNOWSKI NNP
choked VBD VBN
CHOKED VBD VBN
choke VB
CHOKE VB
CHOKING VBG
CHOLESTEROL-FEARING JJ
CHOLESTEROL-LOWERING JJ
CHOLESTEROL NN
CHOLESTEROL-RICH JJ
CHOLET-DUPONT NNP
CHOLET NNP
CHO-LIANG NNP
CHONGJU NNP
CHONG NNP
CHONG-SIK NNP
chooses VBZ
CHOOSES VBZ
Choose VB
choose VB VBP
CHOOSE VB VBP
choosing VBG NN
CHOOSING VBG NN
chopped VBN
CHOPPED VBN
CHOPPING NN VBG
chopping VBG NN
choppy JJ
CHOPPY JJ
CHOPS NNS
CHOPSTICKS NNS
chop VB
CHOP VB
CHORD NN
CHORDS NNS
Chore NN
CHORE NN
CHOREOGRAPHED JJ
CHOREOGRAPHER NN
CHOREOGRAPHERS NNS
CHOREOGRAPHY NN
Chores NNS
CHORES NNS
CHORRILLOS NNP
chortled VBD
CHORTLED VBD
CHORUSES NNS
chorus NN
CHORUS NN
chosen VBN JJ
CHOSEN VBN NNP JJ
chose VBD
CHOSE VBD
CHRISANTHOPOULOS NNP
CHRIS-CRAFT NNP
CHRIS NNP
CHRISTENSEN NNP
CHRISTIAN-DEMOCRATIC NNP
CHRISTIANITY NNP
Christian NNP JJ
CHRISTIAN NNP JJ
CHRISTIANSEN NNP
Christians NNS
CHRISTIANS NNS
CHRISTIC NNP
Christie NNP NN
CHRISTIE NNP NN
CHRISTIES NNP
CHRISTINA NNP
CHRISTINE NNP
Christmas-like JJ
CHRISTMAS-LIKE JJ
CHRISTMAS NNP
CHRIST NNP
CHRISTOPHER NNP
CHRISTY NNP
CHROMOSOME NN
CHROMOSOMES NNS
CHRONICALLY RB
chronic JJ NN
CHRONIC JJ NN
CHRONICLE NN NNP
Chronicles NNS
chronicles VBZ
CHRONICLES VBZ NNS
CHRYSLER NNP
CHRYSOTILE NN
CHUBB NNP
chucked VBD
CHUCKED VBD
chuckles VBZ NNS
CHUCKLES VBZ NNS
CHUCKLING VBG
CHUCK NNP
CHUGAI NNP
CHUGOKU NNP
chug VBP
CHUG VBP
CHUMS NNS
CHUNG NNP
CHUNK NN
CHUNKS NNS
CHURCHES NNS
church-goers NNS
CHURCH-GOERS NNS
CHURCHILL NNP
CHURCH NN NNP
Church NNP NN
CHURCH-OWNED JJ
CHURCH-STATE JJ
churn VBP VB
CHURN VB VBP
CHUTE NN
CHUTZPAH NN
CHW NNP
CHYE NNP
CHYRON NNP
CIALS NNS
CIA NNP
CIA. NNP
CIAVARELLA NNP
CIBA-GEIGY NNP
CIBA NNP
CICERO NNP
CICHAN NNP
CIE NNP
CIE. NNP
CIERA NNP
c.i.f JJ
C.I.F JJ
CIGAR-CHOMPING JJ
CIGARETTE NN
CIGARETTES NNS
CIGAR NN
CIGARS NNS
CIGNA NNP
Cilcorp NNP NN
CILCORP NNP NN
CIMA NNP
CIMFLEX NNP
CIMINERO NNP
CIM NNP
cinch VB
CINCH VB
Cincinnati-based JJ
CINCINNATI-BASED JJ
Cincinnati NNP NNS
CINCINNATI NNP NNS
CINDY NNP
CINEGRILL NNP
CINEMA NN NNP
CINEMATIC JJ
CINEMATOGRAFICA NNP
CINEMATOGRAPHER NN
CINEMATOGRAPHY NN
CINEMAX NNP
CINEPLEX NNP
CINZANO NNP
CIPHER NNP
CIPORKIN NNP
circled VBD
CIRCLED VBD
CIRCLE NN NNP
circles NNS VBZ
CIRCLES NNS VBZ
circuit-board NN
CIRCUIT-BOARD NN
Circuit-breaker JJ
circuit-breaker NN
CIRCUIT-BREAKER NN JJ
CIRCUIT NN NNP
Circuit NNP NN
CIRCUITOUS JJ
CIRCUITS NNS
circular JJ
CIRCULAR JJ
CIRCULARS NNS
circulated VBD VBN
CIRCULATED VBD VBN
CIRCULATE VBP VB
circulate VB VBP
CIRCULATING VBG
CIRCULATION NN NNP
Circulation NNP NN
CIRCULATIONS NNP NNS
CIRCUMLOCUTION NN
circumspect JJ
CIRCUMSPECT JJ
CIRCUMSTANCES NNS
circumstantial JJ
CIRCUMSTANTIAL JJ
CIRCUMVENTING VBG
circumvents VBZ
CIRCUMVENTS VBZ
circumvent VB
CIRCUMVENT VB
circus NN
CIRCUS NNP NN
CITADEL NNP
CITATION NN NNP
CITATIONS NNS
cited VBD VBN
CITED VBD VBN
Cited VBN
cites VBZ
CITES VBZ
cite VBP VB
CITE VBP VB
CITIBANK NNP
Citic NNP JJ
CITIC NNP JJ
Citicorp NNP VB
CITICORP NNP VB
CITIES-ABC NNP
CITIES\/ABC NNP
Cities NNPS NNS
CITIES NNS NNPS
Citing VBG
CITING VBG
CITIZEN NN NNP
CITIZENRY NN
CITIZENSHIP NN
Citizens NNPS NNP NNS
CITIZENS NNS
CITIZENS NNS NNPS NNP
CITIZEN-SPARKED JJ
CIT NNP
City-based JJ
CITY-BASED JJ
CITYFED NNP
CITY NN NNP
City NNP NN
CITY-OWNED JJ
City-type JJ
CITY-TYPE JJ
citywide JJ
CITY-WIDE JJ
CITYWIDE JJ
CIVIC JJ NNP
CIVICS NNS
civilian JJ
CIVILIAN JJ
CIVILIANS NNS
CIVILISED JJ
CIVILITY NN
Civilization NN
CIVILIZATION NN
Civilized JJ
CIVILIZED JJ
civil JJ
CIVIL JJ NNP
Civil NNP JJ
civil-rights NNS
CIVIL-RIGHTS NNS
CIVIL-SERVICE JJ
C.J.B. NNP
C.J. NNP
C.K. NNP
clad JJ VBN
Clad VBN
CLAD VBN JJ
CLAIBORNE NNP
Claimants NNPS
CLAIMANTS NNS
CLAIMANTS NNS NNPS
claimed VBD VBN
CLAIMED VBD VBN
Claiming VBG
CLAIMING VBG
claim NN VBP VB
CLAIM NN VBP VB
Claims NNP NNS NNPS
claims NNS VBZ
CLAIMS NNS VBZ NNP NNPS
claims-processing NN
CLAIMS-PROCESSING NN
CLAIMS VBZ
CLAIRE NNP
CLAIROL NNP
CLAIRTON NNP
clambered VBD
CLAMBERED VBD
clammy JJ
CLAMMY JJ
clamored VBD
CLAMORED VBD
CLAMPDOWN NN
CLAMPDOWNS NNS
clamped VBN
CLAMPED VBN
CLAMPING VBG
clamp VB NN
CLAMP VB NN
CLANAHAN NNP
CLANCY NNP
clandestine JJ
CLANDESTINE JJ
CLANGING NN VBG
clanging VBG NN
CLANKING VBG
clannish JJ
CLANNISH JJ
CLAN NN NNP
CLAPP NNP
CLAPTRAP NN
CLARA NNP
CLARCOR NNP
CLARENCE NNP
CLARENDON NNP
CLARIDGE NNP
CLARIFICATION NN
CLARIFICATIONS NNS
clarified VBN
CLARIFIED VBN
clarifies VBZ
CLARIFIES VBZ
CLARIFYING VBG
clarify VB
CLARIFY VB
CLARINETIST NN
Clarinet NN
CLARINET NN
CLARION NNP
CLARITY NN
CLARKE NNP
CLARK NNP
CLARKSBURG NNP
CLARKSON NNP
CLASHED VBD VBN
clashed VBN VBD
CLASHES NNS
clash NN VB
CLASH NN VB
class-action JJ NN
CLASS-ACTION JJ NN
CLASS-CONSCIOUS JJ
classed VBN
CLASSED VBN
Classes NNS
CLASSES NNS
CLASSICAL JJ
CLASSICAL-MUSIC JJ
CLASSICISM NN
classic JJ NN
CLASSIC JJ NNP NN
Classic NNP JJ NN
Classics NNS
CLASSICS NNS
CLASSIFICATION NN
CLASSIFICATIONS NNS
classified-ad NN
CLASSIFIED-AD NN
classified VBN JJ VBD
CLASSIFIED VBN JJ VBD
classifies VBZ
CLASSIFIES VBZ
classify VB
CLASSIFY VB
CLASSLESS JJ
CLASSMATE NN
CLASSMATES NNS
class NN
CLASS NN NNP
Class NNP NN
CLASSROOM NN NNP
CLASSROOMS NNS
classy JJ
CLASSY JJ
CLAUDE NNP
CLAUDICATION NN
CLAUDIO NNP
Clause NN
CLAUSE NN
CLAUSES NNS
CLAUS NNP
CLAUSTROPHOBIC JJ
Clavier NN
CLAVIER NN
Claws NNS
CLAWS NNS
CLAY NNP
CLAYS NNP
CLAYT NNP
CLAYTON NNP
clean-air JJ NN
CLEAN-AIR JJ NN
CLEAN-BANK JJ
cleaned VBN VBD
CLEANED VBN VBD
CLEANER-BURNING JJ
cleaner JJR NN
CLEANER JJR NN
CLEANERS NNS
clean-fuels NNS
CLEAN-FUELS NNS
Cleaning VBG
cleaning VBG NN
CLEANING VBG NN
cleanliness NN
CLEANLINESS NN
CLEANLY RB
Clean NNP JJ
cleansed VBD VBN
CLEANSED VBD VBN
CLEANSER NN
CLEANSERS NNS
cleanse VB
CLEANSE VB
CLEANSING NN VBG
cleansing VBG NN
cleans VBZ
CLEANS VBZ
CLEAN-UP JJ
CLEANUP NN
clean VB JJ
CLEAN VB NNP JJ
CLEARANCE NN
CLEARANCES NNS
CLEAR-CUT JJ
cleared VBD VBN
CLEARED VBD VBN
clearer JJR
CLEARER JJR
CLEARINGHOUSE NN
clearing NN VBG
CLEARING NN VBG NNP
clear JJ VB RB VBP
CLEAR JJ VB RB VBP
Clearly RB
CLEARLY RB
clears VBZ
CLEARS VBZ
CLEARWATER NNP
CLEAVE NNP
CLEMENSEN NNP
CLEMENS NNP
CLEMENTS NNP
CLENDENIN NNP
CLEO NNP
CLEOPATRA NNP
CLERGYMAN NN
clergy NNS
CLERGY NNS
clerical JJ NN
CLERICAL JJ NN
CLERICS NNS
CLERK NN
CLERKS NNS
CLERK-TURNED JJ
Cleveland-based JJ
CLEVELAND-BASED JJ
Cleveland NNP NN
CLEVELAND NNP NN
clever JJ
CLEVER JJ
CLEVERLY RB
CLICHED JJ
CLICHE NN
clicked VBD
CLICKED VBD
CLICK NN
CLIENTELE NN NNS
clientele NNS NN
CLIENT NN
CLIENT-SERVICE JJ
Clients NNS
CLIENTS NNS
CLIFF NN NNP
CLIFFORD NNP
Cliffs NNPS
CLIFFS NNPS
CLIFTON NNP
Climate NN
CLIMATE NN
CLIMATIC JJ
climbed VBD VBN
CLIMBED VBD VBN
CLIMBERS NNS
CLIMBING VBG
climb NN VB
CLIMB NN VB
climbs VBZ
CLIMBS VBZ
clinched VBD
CLINCHED VBD
CLINCHER NN
CLINCHING VBG
CLING VBP VB
cling VB VBP
clingy JJ
CLINGY JJ
CLINICAL JJ
CLINICALLY RB
clinical-products NNS
CLINICAL-PRODUCTS NNS
clinic NN
CLINIC NN NNP
CLINICS NNS
CLINKERS NNS
CLINT NNP
CLINTON NNP
CLINTONVILLE NNP
CLIPBOARD NN
CLIPBOARD-SIZED JJ
clipped VBD VBN
CLIPPED VBD VBN
CLIPPINGS NNS
CLIPS NNS
clip VB NN
CLIP VB NN
CLIQUES NNS
CLIVE NNP
cloak NN VBP
CLOAK VBP NN
clobbered VBN VBD
CLOBBERED VBN VBD
clobber VB
CLOBBER VB
clocked VBN
CLOCKED VBN
CLOCK NN
clocks NNS VBZ
CLOCKS NNS VBZ
clogged VBN JJ
CLOGGED VBN JJ
CLOGGING VBG
cloned VBN
CLONED VBN
CLONES NNS
CLORETS NNP
CLOROX NNP
CLOSED-CIRCUIT JJ
CLOSED-DOOR JJ
CLOSED-END JJ
Closed JJ NNP VBN
CLOSEDOWN NN
closed VBD VBN JJ VBN|VBD
CLOSED VBD VBN JJ VBN|VBD NNP
CLOSE-KNIT JJ
Closely RB
CLOSELY RB
CLOSE-MOUTHED JJ
closeness NN
CLOSENESS NN
Close NNP JJ RB VB
closer JJR RBR RB
Closer RBR
CLOSER RBR JJR RB
closest JJS
CLOSEST JJS
Closes VBZ
closes VBZ NNS
CLOSES VBZ NNS
CLOSET NN
CLOSET-SIZED JJ
close-up NN
CLOSE-UP NN
close VB NN JJ RB VBP
CLOSE VB NN JJ RB VBP NNP
Closing NN
closing NN VBG JJ VBG|NN
CLOSING NN VBG JJ VBG|NN
CLOSINGS NNS
CLOSURE NN
CLOSURES NNS
clothed VBN
CLOTHED VBN
Clothes NNPS
CLOTHES NNS NNPS
CLOTHESTIME NNP
CLOTHIER NN
CLOTHIERS NNP NNS
clothing NN
CLOTHING NN NNP
CLOTH NN
CLOT-REDUCING JJ
CLOTURE NN
CLOUDCROFT NNP
clouded JJ VBN
CLOUDED JJ VBN
clouding NN
CLOUDING NN
CLOUD NN VBP VB
cloud NN VB VBP
clouds NNS VBZ
CLOUDS NNS VBZ
cloudy JJ
CLOUDY JJ
CLOUGH NNP
CLOUT NN
CLOW NNP
CLOWNS NNS
clubbed VBD
CLUBBED VBD
CLUBBING VBG
CLUB NN NNP
Clubs NNP NNPS NNS
CLUBS NNS
CLUBS NNS NNP NNPS
CLUE NN NNP
CLUES NNS
CLUETT NNP
CLUFF NNP
CLUGGISH NNP
CLUMP NN
CLUMPS NNS
clumsy JJ
CLUMSY JJ
clunky JJ
CLUNKY JJ
clustered VBN
CLUSTERED VBN
CLUSTER NN
CLUSTERS NNS
CLUTCHING VBG
clutch NN VBP
CLUTCH VBP NN
CLUTTERED JJ VBN
cluttered VBN JJ
clutter NN VB
CLUTTER NN VB
CLYDE NNP
CML NNP
c'mon VB
C'mon VB
C'MON VB
CMS NNP
CNA NNP
CNBC NNP
CNCA NNP
CNN NNP
C NNP $
C. NNP LS
C NNP SYM NN $ LS
CNW NNP
COACHES NNS
coaching NN
COACHING NN
COACH NN VB NNP
Coach VB NNP
COAL-FIRED JJ
COALITION NN NNP
Coal NN NNP
COAL NN NNP
COALS-TO-NEWCASTLE JJ
co-anchored VBN
CO-ANCHORED VBN
COAN NNP
coarse JJ
COARSE JJ
coastal JJ
COASTAL NNP JJ
COASTAMERICA NNP
Coast-based JJ
COAST-BASED JJ
coasted VBD
COASTED VBD
COASTER NN
COASTERS NNS
COASTLINE NN
Coast NNP JJ
COAST NNP NN JJ
COASTS NNS
COAST-TO-COAST JJ
COATEDBOARD NNP
coated JJ VBN
COATED JJ VBN
COATES NNP
coating NN
COATING NN
COATINGS NNS NNP
COAT NN
Coats NNP NNS
COATS NNP NNS
COATTAILS NNS
co-authored VBN
CO-AUTHORED VBN
co-author NN
Co-author NN
CO-AUTHOR NN
Co-authors NNS
CO-AUTHORS NNS
COAXING VBG
coax VB
COAX VB
COBBLED VBD VBN
cobbled VBN VBD
COBB NNP
Cobbs NNS
COBBS NNS
COB NNP
COBO NNP
COBURN NNP
COCA-COLA NNP
COCAINE NN
COCA NN
co-chairman NN
CO-CHAIRMAN NN
co-chairmen NNS
CO-CHAIRMEN NNS
COCHE-DURY NNP
co-chief JJ NN
CO-CHIEF JJ NN
COCHRANE NNP
COCKATOOS NNS
COCKBURN NNP
cockiness NN
COCKINESS NN
COCKPIT NN
COCKROACHES NNS
COCKTAIL NN
COCKTAILS NNS
cocky JJ
COCKY JJ
COCOA NN
COCOA NN NNP
COCOA-TRADING JJ
COCOM NNP
COCONUT NNP
Coconuts NNPS
COCONUTS NNS NNPS
COCOTTE NN
CODA NNP
coddled VBN
CODDLED VBN
coddling NN
CODDLING NN
coded VBN
CODED VBN
co-defendant NN
CO-DEFENDANT NN
co-defendants NNS
CO-DEFENDANTS NNS
CODE-NAMED JJ NNP VBN
code-named NNP JJ
CODE-NAMED VBN
CODE NNP NN VB
code NN VB
CODE-RELATED JJ
CODES NNS
co-developers NNS
CO-DEVELOPERS NNS
CODIFICATION NN
codified VBN
CODIFIED VBN
Codifying VBG
CODIFYING VBG
cod-liver NN
COD-LIVER NN
CODPIECE NN
CO-EDITED JJ
co-editor NN
CO-EDITOR NN
co-edits VBZ
CO-EDITS VBZ
coed NN
COED NN
COELHO NNP
COEN NNP
COE NNP
coerces VBZ
COERCES VBZ
COERCION NN
COERCIVE JJ
COEUR NNP
co-existence NN
CO-EXISTENCE NN
co-exist VB
CO-EXIST VB
coextrude VBP
COEXTRUDE VBP
COFFEEHOUSE NN
COFFEE NN
COFFEE NN NNP
COFFEE-ROASTING JJ
Coffee-shop NN
COFFEE-SHOP NN
COFFERS NNS
COFFIELD NNP
COFFIN NN
co-founded VBD
CO-FOUNDED VBD
co-founder NN
CO-FOUNDER NN
co-founders NNS
CO-FOUNDERS NNS
COGENERATION NN NNP
cogeneration-plant NN
COGENERATION-PLANT NN
cognoscenti NNS
COGNOSCENTI NNS
co-head NN
CO-HEAD NN
COHEN NNP
Cohens NNPS
COHENS NNPS
COHERENCE NN
coherent JJ
COHERENT JJ NNP
COHERENTLY RB
cohere VB
COHERE VB
co-hero NN
CO-HERO NN
COHESION NN
COHESIVE JJ
COHODES NNP
COHORTS NNS
co-host VB
CO-HOST VB
COIFFED JJ
COIL NN
coincided VBD
COINCIDED VBD
COINCIDENCE NN
coincidental JJ
COINCIDENTAL JJ
coincident JJ
Coincident JJ
COINCIDENT JJ
coincides VBZ
COINCIDES VBZ
coincide VB
COINCIDE VB
COIN-CLEANING JJ
coined VBN
COINED VBN
COIN NN NNP
COIN-OPERATED JJ
COINS NNS
COKELY NNP
Coke NNP NN
COKE NNP NN
COLANDER NN
COLA NN NNP
COLAS NNS
COLBY NNP
cold-cuts NNS
COLD-CUTS NNS
colder JJR
Colder JJR
COLDER JJR
cold JJ NN
COLD JJ NN NNP
COLD-ROLLED JJ
COLD-STORAGE JJ
COLD-WEATHER JJ
COLDWELL NNP
CO-LEAD JJ
COLECO NNP
COLEMAN NNP
COLE NNP
COLES NNP
COLGATE NNP
COLGATE-PALMOLIVE NNP
COLINAS NNP
COLIN NNP
coli NNS
COLI NNS
Coliseum NNP NN
COLISEUM NNP NN
collaborated VBD
COLLABORATED VBD
COLLABORATE VBP VB
collaborate VB VBP
COLLABORATING VBG
COLLABORATION NN
COLLABORATIVE JJ
COLLABORATORS NNS
COLLAGE NN
COLLAGEN NN NNP
COLLAGES NNS
collapsed VBD VBN JJ
COLLAPSED VBD VBN JJ
collapse NN VB
COLLAPSE NN VB
collapses VBZ NNS
COLLAPSES VBZ NNS
COLLAPSING VBG
COLLAR NN
COLLARS NNS
collateralized JJ VBN
COLLATERALIZED JJ VBN NNP
collateral NN JJ
COLLATERAL NN JJ
COLLEAGUE NN
Colleagues NNS
COLLEAGUES NNS
COLLECTABILITY NN
collected VBN VBD
COLLECTED VBN VBD
Collectibles NNP NNS
COLLECTIBLES NNS NNP
COLLECTING NN
collecting VBG NN
COLLECTING VBG NN
COLLECTION NN NNP
COLLECTIONS NNS
COLLECTIVE-BARGAINING JJ
COLLECTIVE JJ
Collectively RB
COLLECTIVELY RB
COLLECTIVES NNS
COLLECTIVIZERS NNS
COLLECTOR NN NNP
Collectors NNS
COLLECTORS NNS
collects VBZ
COLLECTS VBZ
collect VB VBP JJ
COLLECT VB VBP JJ
COLLEEN NNP
COLLEGE-BOUND JJ
college-bowl NN
COLLEGE-BOWL NN
COLLEGE-EDUCATED JJ
COLLEGE NN NNP
Colleges NNS NNP
COLLEGES NNS NNP
COLLEGE-SPORTS JJ NNS
college-sports NNS JJ
collegial JJ
COLLEGIAL JJ
collegiate JJ
COLLEGIATE JJ NNP
COLLINS NNP
collision-damage NN
COLLISION-DAMAGE NN
COLLISION NNP
COLLOQUIES NNS
COLLOQUIUM NN
COLLOR NNP
COLNAGHI NNP
COL. NNP
COLODNY NNP
COLOGNE NNP
COLOMBATTO NNP
Colombian JJ
COLOMBIAN JJ
COLOMBIA NNP
Colombians NNPS
COLOMBIANS NNPS
colon-cancer NN
COLON-CANCER NN
COLONEL NN NNP
COLONIALISTS NNS
colonial NN JJ
COLONIAL NN JJ NNP
COLONIA NNP
COLONIES NNS
COLONISTS NNS
Colon NN NNP
COLON NN NNP
COLO NNP
COLO. NNP
COLONSVILLE NNP
COLONY NN NNP
Colony NNP NN
COLORADO NNP
COLORATURA NN
color-coded VBN
COLOR-CODED VBN
color-coding VBG
COLOR-CODING VBG
colored VBN
coloured VBN
COLORED VBN NNP
COLORFUL JJ
COLORIZATION NN
colorlessness NN
COLORLESSNESS NN
COLORLINER NNP
color NN JJ VB
COLOR NN NNP JJ VB
Color NNP NN
COLOR-PRINTING JJ
COLORS NNS
color-television NN
COLOR-TELEVISION NN
colossus NN
COLOSSUS NN
COLS NNP
COLSON NNP
COLSTON NNP
COLTON NNP
COLTS NNP
COLUCCI NNP
COLUMBIA NNP
Columbus NNP NN
COLUMBUS NNP NN
COLUMNIST NN
COLUMNISTS NNS
COLUMN NN
COLUMNS NNS
COMAIR NNP
co-managed VBN
CO-MANAGED VBN
co-manager NN
CO-MANAGER NN
co-managing JJ VBG
CO-MANAGING JJ VBG
COMANCHE NNP
COMBATANTS NNS
COMBATING VBG
combat NN VB
COMBAT NN VB
Combatting VBG
COMBATTING VBG
combed VBN
COMBED VBN
COMBINATION NN
COMBINATIONS NNS
Combined VBN JJ NNP
combined VBN JJ VBD
COMBINED VBN JJ VBD NNP
combines VBZ NNS
COMBINES VBZ NNS
combine VB VBP
COMBINE VB VBP
COMBING VBG
COMBINING VBG
Combis NNPS
COMBIS NNPS
COMBO NNP
COMBUSTION NNP NN
COMCAST NNP
COMDISCO NNP
COMEAU NNP
COMEBACK NN NNP
COMEDIAN NN
COMEDIC JJ
COMEDIES NNS
COMEDY NN NNP
COMERICA NNP
COMESTIBLES NNS
comes VBZ
Comes VBZ
COMES VBZ
COMETS NNS
COMEUPPANCE NN
Come VBN VB
come VB VBN VBP VBD
COME VB VBN VBP VBD
COMEX NNP
COMFORTABLE JJ
COMFORTABLY RB
comforted VBN
COMFORTED VBN
comforting JJ VBG
COMFORTING JJ VBG
COMFORT NN NNP
Comfort NNP NN
COMFORTS NNS
COMICALLY RB
comic JJ NN
COMIC JJ NN
Comics NNPS
COMICS NNPS
COMING-OF-AGE JJ
COMING-OUT JJ
Coming VBG
coming VBG JJ
COMING VBG JJ
COMISSION NNP
COMITY NN
COMMAND-AND-CONTROL JJ
COMMANDANT NN
commanded VBN
COMMANDED VBN
COMMANDER NN NNP
COMMANDERS NNS
commanding JJ VBG
COMMANDING JJ VBG
Commandment NN
COMMANDMENT NN
COMMAND NN NNP VB VBP
command NN VB VBP
COMMANDOS NNS
commemorated VBD
COMMEMORATED VBD
commemorate VBP VB
COMMEMORATE VB VBP
commemorative JJ NN
COMMEMORATIVE JJ NN
commenced VBD
COMMENCED VBD
COMMENCEMENT NN
COMMENCING VBG
COMMENDABLE JJ
commends VBZ
COMMENDS VBZ
commend VB
COMMEND VB
commensurate JJ
COMMENSURATE JJ
COMMENTARIES NNS
commentary NN
COMMENTARY NN
COMMENTATOR NN
Commentators NNS
COMMENTATORS NNS
commented VBD
COMMENTED VBD
Commenting VBG
COMMENTING VBG
Comment NN NNP
COMMENTS NNS
Comments NNS NNP
comments NNS VBZ
COMMENTS NNS VBZ NNP
comment VB NN
COMMENT VB NN NNP
COMMERCE NNP NN
commercial-credit NN
COMMERCIAL-CREDIT NN
COMMERCIALE NNP
COMMERCIALIZATION NN
commercialize VB
COMMERCIALIZE VB
COMMERCIALIZING VBG
commercial JJ NN
COMMERCIAL JJ NN NNP
COMMERCIAL JJ NNP NN
COMMERCIALLY RB
Commercial NNP JJ NN
COMMERCIAL-PRODUCTS JJ
Commercials NNS
COMMERCIALS NNS
COMMERCIAL-SWITCH JJ
COMMERICAL JJ
COMMERZBANK NNP
commissioned VBN VBD
COMMISSIONED VBN VBD
COMMISSIONER NN NNP
COMMISSIONERS NNS
Commissioning VBG
COMMISSIONING VBG
Commission NNP NN FW
COMMISSION NNP NN FW
Commissions NNS
commissions NNS VBZ
COMMISSIONS NNS VBZ
COMMITMENT NN
COMMITMENTS NNS
commits VBZ
COMMITS VBZ
committed VBN JJ VBD
COMMITTED VBN JJ VBD
COMMITTEE NN NNP
Committee NNP NN
Committees NNS
committees NNS VBZ
COMMITTEES NNS VBZ
COMMITTES NNS
COMMITTING VBG
commit VB VBP
COMMIT VB VBP
commmon JJ
COMMMON JJ
Commodities NNS NNP NNPS
COMMODITIES NNS NNP NNPS
commoditize VB
COMMODITIZE VB
COMMODITY-CHEMICAL JJ
COMMODITY NN NNP
Commodity NNP NN
COMMODITY-ORIENTED JJ
COMMODORE NNP
COMMONALITY NN
common-carrier NN
COMMON-CARRIER NN
COMMONER NNP
common JJ NN
COMMON JJ NN NNP
common-law NN
COMMON-LAW NN
COMMONLY RB
Common NNP JJ
commonplace JJ NN
COMMONPLACE JJ NN
common-sense JJ NN
COMMON-SENSE NN JJ
COMMON-SHARE JJ
Commons NNP NNPS NN
COMMONS NNP NNPS NN
COMMON-STOCK JJ
COMMONSTOCK NN
Commonwealth NNP NN
COMMONWEALTH NNP NN
COMMOTION NN
communal JJ
COMMUNAL JJ
COMMUNICATED VBD VBN
communicated VBN VBD
communicate VB
COMMUNICATE VB
COMMUNICATING VBG
COMMUNICATION NNP NN
COMMUNICATIONS-NETWORK JJ
Communications NNP NNPS
COMMUNICATIONS NNP NNPS NNS NN
COMMUNICATIONS NNPS NNP
communications NNS NN
COMMUNION NNP
COMMUNIQUES NNS
COMMUNISM NN NNP
communist NN JJ
Communist NNP JJ
COMMUNIST NNP JJ NN
Communists NNPS NNS
COMMUNISTS NNPS NNS
COMMUNITIES NNS
community-development NN
COMMUNITY-DEVELOPMENT NN
COMMUNITY NN NNP
Community NNP NN
COMMUTE NN
COMMUTER NN
COMMUTERS NNS
COMMUTES NNS
COMMUTING VBG
COM NN NNP
compact-car NN
COMPACT-CAR NN
compacted JJ VBN
COMPACTED JJ VBN
COMPACTION NN
compact JJ NN
COMPACT JJ NN
COMPANIA NNP
COMPANIES NNS NNP
Companies NNS NNPS NNP
COMPANIES NNS NNPS NNP
companion NN JJ
COMPANION NN JJ NNP
COMPANIONS NNS
Company NN NNP
COMPANY NN NNP
COMPANY-OPERATED JJ
COMPANY-OWNED JJ
COMPANY-SPONSORED JJ
Compaq NNP VB
COMPAQ NNP VB
COMPARABILITY NN
Comparable JJ
COMPARABLE JJ
COMPARABLY RB
COMPARATIVE JJ
COMPARATIVELY RB
Compared VBN
compared VBN VBD
COMPARED VBN VBD
compares VBZ
COMPARES VBZ
Compare VB
COMPARE VB
compare VB VBP
COMPARE VB VBP
Comparing VBG
COMPARING VBG
COMPARISON NN
COMPARISONS NNS
COMPARTMENT NN
COMPASSION NN NNP
COMPATABILITY NN
COMPATIBILITY NN
COMPATIBLE JJ
COMPATRIOT NN
COMPATRIOTS NNS
compelled VBN
Compelled VBN
COMPELLED VBN
compelling JJ
COMPELLING JJ
compels VBZ
COMPELS VBZ
compel VB
COMPEL VB
compensated VBN
COMPENSATED VBN
compensates VBZ
COMPENSATES VBZ
compensate VB
COMPENSATE VB
COMPENSATION NN NNP
COMPENSATIONS NNS
compensatory JJ
COMPENSATORY JJ
COMPETED VBD VBN
competed VBN VBD
COMPETENCE NN
COMPETENCY NN
competent JJ
COMPETENT JJ
competes VBZ
Competes VBZ
COMPETES VBZ
compete VB VBP
COMPETE VB VBP
Competing VBG
competing VBG JJ VBG|JJ
COMPETING VBG JJ VBG|JJ
Competition NN NNP
COMPETITION NN NNP
COMPETITIONS NNS
COMPETITIVE JJ
COMPETITIVELY RB
competitiveness NN
COMPETITIVENESS NN
COMPETITOR NN
Competitors NNS
COMPETITORS NNS
competitve JJ
COMPETITVE JJ
COMPILATION NN
compiled VBN
Compiled VBN
COMPILED VBN
COMPILER NN
compiles VBZ
COMPILES VBZ
compile VB
COMPILE VB
COMPILING VBG
COMPLACENCY NN
complacent JJ
COMPLACENT JJ
COMPLAINANT NN
complained VBD VBN
COMPLAINED VBD VBN
COMPLAINING VBG
complains VBZ
COMPLAINS VBZ
COMPLAINT NN
complaint-resolution NN
COMPLAINT-RESOLUTION NN
Complaints NNS
COMPLAINTS NNS
complain VBP VB
COMPLAIN VBP VB
COMPLEMENTARY JJ
complements VBZ
COMPLEMENTS VBZ
complement VB
COMPLEMENT VB
COMPLETED-CONTRACT JJ
completed VBN VBD JJ
COMPLETED VBN VBD JJ
Complete JJ
complete JJ VB
COMPLETE JJ VB
COMPLETELY RB
completeness NN
COMPLETENESS NN
completes VBZ
COMPLETES VBZ
COMPLETING VBG
Completion NN NNP
COMPLETION NN NNP
COMPLETIONS NNS
COMPLEXES NNS
COMPLEXITIES NNS
COMPLEXITY NN
Complex JJ
complex JJ NN
COMPLEX JJ NN
COMPLIANCE NN NNP
Compliance NNP NN
complicated VBN JJ IN VBD
COMPLICATED VBN JJ VBD IN
complicates VBZ
COMPLICATES VBZ
complicate VB
COMPLICATE VB
COMPLICATION NN
COMPLICATIONS NNS
COMPLICITY NN
complied VBN VBD
COMPLIED VBN VBD
compliment NN VBP
COMPLIMENT NN VBP
COMPLIMENTS NNS
Complying VBG
COMPLYING VBG
comply VB
COMPLY VB
COMPONENT NN
Components NNP NNPS
COMPONENTS NNS NNP NNPS
composed VBN
COMPOSED VBN
Composer NN
COMPOSER NN
COMPOSERS NNS
composite JJ NN
COMPOSITE JJ NNP NN
Composite NNP NN
COMPOSITES NNS
compositional JJ
COMPOSITIONAL JJ
COMPOSITION NN
COMPOSITIONS NNS
composting NN
COMPOSTING NN
compounded VBN VBD
COMPOUNDED VBN VBD
compounding NN VBG
COMPOUNDING NN VBG
Compounding VBG
Compound NN JJ
compound NN JJ VB
COMPOUND NN JJ VB
COMPOUNDS NNS
COMPREHENSION NN
COMPREHENSIVE JJ NNP
COMPREHENSIVELY RB
comprehensiveness NN
COMPREHENSIVENESS NN
Comprehensive NNP JJ
compressed VBN
COMPRESSED VBN
COMPRESSORS NNS
comprised VBN
COMPRISED VBN
comprises VBZ
COMPRISES VBZ
comprise VBP VB
COMPRISE VBP VB
COMPRISING VBG
compromised VBN
COMPROMISED VBN
compromise NN VB JJ
COMPROMISE NN VB JJ
Compromises NNS
compromises NNS VBZ
COMPROMISES NNS VBZ
COMPROMISING VBG
COMPTON NNP
COMPTROLLER NN NNP
Comptroller NNP NN
COMPULSION NN
COMPULSIONS NNS
COMPULSIVE JJ
compulsory JJ
COMPULSORY JJ
COMPUSERVE NNP
Computations NNS
COMPUTATIONS NNS
COMPUTER-AIDED JJ
computer-assembly NN
COMPUTER-ASSEMBLY NN
COMPUTER-ASSISTED JJ
COMPUTER-BASED JJ
COMPUTER-CHIP JJ NN
computer-chip NN JJ
COMPUTER-DATA-STORAGE JJ
COMPUTER-DEPENDENT JJ
COMPUTER-DISTRIBUTED JJ
COMPUTER-DRIVEN JJ
COMPUTER-EDITED JJ
Computer-generated JJ
COMPUTER-GENERATED JJ
Computer-guided JJ
COMPUTER-GUIDED JJ
COMPUTER-INTEGRATED JJ
COMPUTER-INTEGRATED-MANUFACTURING JJ
computerized JJ VBN NN
COMPUTERIZED JJ VBN NN
computerize VB
COMPUTERIZE VB
COMPUTERIZING VBG
COMPUTERLAND NNP
computer-maintenance NN JJ
COMPUTER-MAINTENANCE NN JJ
COMPUTER-MARKET JJ
COMPUTER-MATCHING JJ
computer-network NN
COMPUTER-NETWORK NN
COMPUTER NN NNP
Computer NNP NN
COMPUTER NNP NN
computer-printer NN
COMPUTER-PRINTER NN
computer-products NNS
COMPUTER-PRODUCTS NNS
COMPUTER-RELATED JJ
COMPUTER-ROOM JJ
computer-science NN
COMPUTER-SCIENCE NN
COMPUTER-SECURITY JJ
COMPUTER-SERVICE JJ
computer-services NNS
COMPUTER-SERVICES NNS
computer-servicing JJ NN
COMPUTER-SERVICING NN JJ
Computers NNPS NNS NNP
COMPUTERS NNS NNP
COMPUTERS NNS NNP NNPS
computer-software NN
COMPUTER-SOFTWARE NN
COMPUTER-SYSTEM-DESIGN JJ
computer-systems NNS
COMPUTER-SYSTEMS NNS
COMPUTERWORLD NNP
computes VBZ
COMPUTES VBZ
compute VB
COMPUTE VB
computing NN VBG
COMPUTING NN VBG NNP
COMPUTING-SERVICES JJ
COMRADE NN
COMRADES NNS
COMSAT NNP
COMTES NNP
COMVIK NNP
CONAGRA NNP
CONANT NNP
CONASUPO NNP
concealed VBN
CONCEALED VBN
CONCEALING VBG
conceal VB
CONCEAL VB
conceded VBD VBN
CONCEDED VBD VBN
concedes VBZ
CONCEDES VBZ
concede VBP VB
CONCEDE VBP VB
CONCEDING VBG
CONCEIT NN
CONCEIVABLE JJ
Conceivably RB
CONCEIVABLY RB
CONCEIVED JJ VBD VBN
conceived VBD VBN JJ
CONCEIVER NN
conceive VB
CONCEIVE VB
CONCEIVING VBG
concentrated VBN JJ VBD
CONCENTRATED VBN JJ VBD
concentrates VBZ
CONCENTRATES VBZ
concentrate VB NN VBP
CONCENTRATE VB VBP NN
CONCENTRATING VBG
CONCENTRATION NN
CONCENTRATIONS NNS
CONCEPTION NN
CONCEPTIONS NNS
CONCEPT NN
CONCEPTS NNS
conceptual JJ
CONCEPTUAL JJ
Conceptually RB
CONCEPTUALLY RB
Concerned VBN JJ NNP
concerned VBN JJ VBD
CONCERNED VBN JJ VBD NNP
Concerning VBG
CONCERNING VBG
Concern NN
concern NN VB
CONCERN NN VB
Concerns NNS
concerns NNS VBZ
CONCERNS NNS VBZ
CONCERTED JJ
CONCERT NN NNP
CONCERTO NNP
CONCERTOS NNS
CONCERTS NNS
CONCESSION NN
CONCESSIONS NNS
conciliatory JJ
CONCILIATORY JJ
CONCISION NN
concluded VBD VBN
CONCLUDED VBD VBN
concludes VBZ
CONCLUDES VBZ
conclude VB VBP
CONCLUDE VB VBP
CONCLUDING VBG
CONCLUSION NN
CONCLUSIONS NNS
CONCLUSIVELY RB
concocted VBN
CONCOCTED VBN
CONCOCTIONS NNS
Concocts VBZ
CONCOCTS VBZ
CONCOMITANT JJ NN
CONCOMITANTLY RB
concomitant NN JJ
CONCORDE NNP
CONCORD NNP
concrete JJ NN
CONCRETE JJ NN
concurred VBD
CONCURRED VBD
Concurrence NN
CONCURRENCE NN
concurrent JJ
Concurrent JJ
CONCURRENT JJ
CONCURRENTLY RB
concur VB
CONCUR VB
CONDEMNATION NN
condemned VBN VBD
CONDEMNED VBN VBD
CONDEMNING VBG
condemns VBZ
CONDEMNS VBZ
condemn VB
CONDEMN VB
CONDE NNP
CONDENSED JJ
CONDENSERS NNS
CONDESCENSION NN
conditional JJ
CONDITIONAL JJ
CONDITIONALLY RB
conditioned VBN
CONDITIONED VBN
CONDITIONER NN
CONDITIONERS NNS
conditioning NN
CONDITIONING NN
CONDITION NN
CONDITIONS NNS
CONDOMINIUM NN NNP
CONDOMINIUMS NNS
CONDOM NN
CONDOMS NNS
condoned VBD
CONDONED VBD
condone VB
CONDONE VB
CONDOS NNS
CONDUCIVE JJ
conducted VBN VBD
CONDUCTED VBN VBD
conducting VBG NN
CONDUCTING VBG NN
conduct NN VB VBP
CONDUCT NN VB VBP NNP
CONDUCTOR NN
conducts VBZ
CONDUCTS VBZ
CONDUIT NN
Conduits NNS
CONDUITS NNS
CONE NNP
CONES NNS
CONFAIR NNP
CONFECTIONER NNP
Confectionery JJ
CONFECTIONERY NN JJ
CONFEDERATION NNP NN
Confederations NNPS
CONFEDERATIONS NNPS
Conferees NNS
CONFEREES NNS
CONFERENCE NN NNP
Conference NNP NN
CONFERENCES NNS
conferred VBD
CONFERRED VBD
CONFERRING VBG
confers VBZ
CONFERS VBZ
confer VB VBP
CONFER VB VBP NNP
confessed VBD VBN
CONFESSED VBD VBN
confesses VBZ
CONFESSES VBZ
CONFESSING VBG
CONFESSION NN NNP
CONFESSIONS NNS
CONFICT NN
CONFIDANT NN
CONFIDANTS NNS
confided VBD
CONFIDED VBD
confidence-crusher NN
CONFIDENCE-CRUSHER NN
Confidence NN NNP
CONFIDENCE NN NNP
CONFIDENTIALITY NN
confidential JJ
CONFIDENTIAL JJ NNP
confident JJ
CONFIDENT JJ
CONFIDENTLY RB
confides VBZ
CONFIDES VBZ
Confiding VBG
CONFIDING VBG
CONFIGURATION-DATA JJ
CONFIGURATION NN
CONFIGURATIONS NNS
confined VBN
CONFINED VBN
CONFINEMENT NN
CONFINES NNS
CONFIRMATION NN
confirmed VBD VBN
CONFIRMED VBD VBN
Confirming VBG
CONFIRMING VBG
confirms VBZ
CONFIRMS VBZ
confirm VB VBP
CONFIRM VB VBP
confiscated VBN VBD
CONFISCATED VBN VBD
confiscate VB
CONFISCATE VB
CONFISCATING VBG
CONFISCATION NN
CONFLATION NN
conflicted VBN
CONFLICTED VBN
conflicting JJ VBG
CONFLICTING JJ VBG
conflict NN VBP
CONFLICT NN VBP
conflict-of-interest NN JJ
CONFLICT-OF-INTEREST NN JJ
CONFLICTS NNS
CONFLUENCE NN
CONFORMING VBG
conforms VBZ
CONFORMS VBZ
conform VB VBP
CONFORM VB VBP
confreres FW
CONFRERES FW
confrontational JJ
CONFRONTATIONAL JJ
CONFRONTATION NN
CONFRONTATIONS NNS
confronted VBN
Confronted VBN
CONFRONTED VBN
CONFRONTING VBG
confronts VBZ
CONFRONTS VBZ
confront VBP VB
CONFRONT VBP VB
confused VBN JJ VBD
CONFUSED VBN JJ VBD
confuses VBZ
CONFUSES VBZ
confuse VB
CONFUSE VB
confusing JJ VBG
CONFUSING JJ VBG
Confusion NN
CONFUSION NN
CONFUSIONS NNS
Confutatis FW
CONFUTATIS FW
CONGDON NNP
congenial JJ
CONGENIAL JJ
CONGER NNP
CONGESTION NN
CONGESTIVE JJ
conglomerate NN JJ
CONGLOMERATE NN JJ
CONGLOMERATES NNS
Congolese JJ
CONGOLESE JJ
CONGO NNP
congratulated VBD VBN
CONGRATULATED VBD VBN
congratulate VB
CONGRATULATE VB
congratulating NN
CONGRATULATING NN
Congratulations UH
CONGRATULATIONS UH
congratulatory JJ
CONGRATULATORY JJ
CONGREGATION NN
congressional JJ
CONGRESSIONAL JJ
CONGRESSIONAL JJ NNP
CONGRESSIONALLY RB
Congressional NNP JJ
CONGRESSMAN NN NNP
congressmen NNS
Congressmen NNS NNPS
CONGRESSMEN NNS NNPS
congress NN
CONGRESS NNP NN
congressonal JJ
CONGRESSONAL JJ
CONGRESS'S NNP
Coniston NNP NN
CONISTON NNP NN
CONJECTURE NN
con JJ NN RB VB
CON JJ NN VB RB
CONJUNCTION NN
conjures VBZ
CONJURES VBZ
conjure VBP
CONJURE VBP
CONLIN NNP
CONLON NNP
Connaught NNP NN
CONNAUGHT NNP NN
Conn.-based JJ
Conn.based JJ
CONN.-BASED JJ
CONN.BASED JJ
connected VBN JJ
CONNECTED VBN JJ
CONNECTICUT NNP
CONNECTING VBG
Connection NN
CONNECTION NN
CONNECTIONS NNS NNP
CONNECTOR NN
Connectors NNPS
CONNECTORS NNPS
connects VBZ
CONNECTS VBZ
CONNECT VBP VB
connect VB VBP
CONNER NNP
CONNIE NNP
CONNING NNP
Con NN
CONN NNP
CONN. NNP
CONNOISSEUR NN NNP
CONNOLLY NNP
CONNORS NNP
CONNOTATION NN
CONNOTATIONS NNS
connote VB
CONNOTE VB
CO NNP
Co. NNP NN
CO. NNP NN
CONOCO NNP
conquer VB
CONQUER VB
CONQUEST NN
CONRADES NNP
CONRADIE NNP
Conradies NNP NNPS
CONRADIES NNP NNPS
CONRAD NNP
CONRAIL NNP
CONREID NNP
CONSCIENCE NN
CONSCIENTIOUS JJ
CONSCIOUS JJ
CONSCIOUSLY RB
consciousness NN
CONSCIOUSNESS NN
conscript JJ
CONSCRIPT JJ
CONSCRIPTS NNS
CONSECO NNP
CONSECUTIVE JJ
consensus NN
CONSENSUS NN NNP
consented VBD VBN
CONSENTED VBD VBN
CONSENTING VBG
CONSENT NN NNP VB
consent NN VB
CONSENTS NNS
consentual JJ
CONSENTUAL JJ
Consequence NN
CONSEQUENCE NN
CONSEQUENCES NNS
consequent JJ
CONSEQUENT JJ
Consequently RB
CONSEQUENTLY RB
CONSERVANCY NN NNP
Conservationists NNS
CONSERVATIONISTS NNS
CONSERVATION NN NNP
CONSERVATISM NN
CONSERVATIVE-COMMUNIST JJ
conservative JJ NN
CONSERVATIVE JJ NN NNP
Conservative JJ NNP NN
CONSERVATIVE-LED JJ
CONSERVATIVELY RB
CONSERVATIVES NNS
Conservatives NNS NNPS
CONSERVATIVES NNS NNPS
CONSERVATORSHIP NN
CONSERVATORY NN NNP
conserve VB
CONSERVE VB
CONSIDERABLE JJ
CONSIDERABLY RB
CONSIDERATION NN
CONSIDERATIONS NNS
Considered VBN
considered VBN VBD JJ
CONSIDERED VBN VBD JJ
Considering VBG
CONSIDERING VBG
considers VBZ
CONSIDERS VBZ
Consider VB
consider VB VBP
CONSIDER VB VBP
consigned VBN
CONSIGNED VBN
consigns VBZ
CONSIGNS VBZ
consisted VBD VBN
CONSISTED VBD VBN
CONSISTENCY NN
consistent JJ
CONSISTENT JJ
Consistently RB
CONSISTENTLY RB
Consisting VBG
CONSISTING VBG
consists VBZ
CONSISTS VBZ
consist VBP VB
CONSIST VBP VB
CONS NNS
CONSOB NNP
CONSOLATION NN
consoles VBZ
CONSOLES VBZ
console VB
CONSOLE VB
consolidated JJ VBN VBD
CONSOLIDATED NNP JJ VBN VBD
consolidates VBZ
CONSOLIDATES VBZ
consolidate VB
CONSOLIDATE VB
CONSOLIDATING VBG
Consolidation NN
CONSOLIDATION NN
CONSOLIDATIONS NNS
CONSOLO NNP
CONSOMME NN
consonant JJ
CONSONANT JJ
CONSONANTS NNS
CONSORTIA NN
CONSORTING VBG
CONSORTIUM NN NNP
consortium-ownership NN
CONSORTIUM-OWNERSHIP NN
CONSORT NNP
Conspicuous JJ
CONSPICUOUS JJ
CONSPICUOUSLY RB
CONSPIRACIES NNS
CONSPIRACY NN NNP
CONSPIRATOR NN
CONSPIRATORS NNS
conspired VBD
CONSPIRED VBD
conspire VBP
CONSPIRE VBP
CONSPIRING VBG
CONSTABLE NNP
CONSTANCE NNP
CONSTANTINE NNP
constant JJ
Constant JJ
CONSTANT JJ
CONSTANTLY RB
CONSTERNATION NN
CONSTITUENCIES NNS
CONSTITUENCY NN
constituent NN JJ
CONSTITUENT NN JJ
CONSTITUENTS NNS
constituted VBD
CONSTITUTED VBD
constitutes VBZ
CONSTITUTES VBZ
constitute VBP VB
CONSTITUTE VBP VB
CONSTITUTIONALITY NN
constitutional JJ
CONSTITUTIONAL JJ NNP
constitutional-law NN
CONSTITUTIONAL-LAW NN
CONSTITUTIONALLY RB
CONSTITUTION NNP NN
constrained VBN
CONSTRAINED VBN
constrains VBZ
CONSTRAINS VBZ
CONSTRAINT NN
CONSTRAINTS NNS
constrain VB
CONSTRAIN VB
CONSTRICTING VBG
CONSTRICTORS NNS
constructed VBN
CONSTRUCTED VBN
CONSTRUCTEURS NNP
CONSTRUCTING VBG
construction-industry NN
CONSTRUCTION-INDUSTRY NN
CONSTRUCTION-MANAGEMENT JJ
CONSTRUCTION NN NNP
Construction NNP NN
CONSTRUCTION-ORIENTED JJ
CONSTRUCTION-RELATED JJ
CONSTRUCTIONS NNP NNS
CONSTRUCTIVE JJ
CONSTRUCTIVELY RB
CONSTRUCTON NN
construct VB
CONSTRUCT VB
construed VBN VBD
CONSTRUED VBN VBD
CONSTRUE VBP VB
construe VB VBP
CONSULATE NN
CONSUL NN
Consultant NN
CONSULTANT NN
Consultants NNP NNPS NNS
CONSULTANTS NNS NNP NNPS
CONSULTATION NN
CONSULTATIONS NNS
consulted VBN
CONSULTED VBN
consulting-firm NN
CONSULTING-FIRM NN
consulting NN VBG JJ
CONSULTING NN VBG NNP JJ
consult VB
CONSULT VB
consumed VBN VBD
CONSUMED VBN VBD
CONSUMER-ADVOCACY JJ
CONSUMER-CREDIT JJ
CONSUMER-DRIVEN JJ
consumer-electronics JJ NNS
CONSUMER-ELECTRONICS JJ NNS
consumer-goods NNS
CONSUMER-GOODS NNS
CONSUMER NN
CONSUMER NN NNP
Consumer NNP NN
CONSUMER-ORIENTED JJ
consumer-price JJ NN
CONSUMER-PRICE NN JJ
consumer-product NN
CONSUMER-PRODUCT NN
consumer-products NNS JJ
CONSUMER-PRODUCTS NNS JJ
Consumers NNS NNPS NNP
CONSUMERS NNS NNPS NNP
CONSUMER-TELEPHONE JJ
consume VBP VB
CONSUME VBP VB
consuming NN
CONSUMING NN
consummated VBN
CONSUMMATED VBN
consummate JJ
CONSUMMATE JJ
CONSUMPTION NN
contacted VBN VBD
CONTACTED VBN VBD
CONTACTING VBG
CONTACT NN
Contact NN NNP
contact NN VB
CONTACT NN VB NNP
CONTACTS NNS
CONTAGIOUS JJ
contained VBD VBN JJ
CONTAINED VBD VBN JJ
CONTAINERBOARD NN
containerized-cargo NN
CONTAINERIZED-CARGO NN
CONTAINER NNP NN
container-ship NN
CONTAINER-SHIP NN
Containers NNPS NNP
CONTAINERS NNPS NNS NNP
CONTAINING VBG
CONTAINMENT NN NNP
contains VBZ
CONTAINS VBZ
contain VB VBP
CONTAIN VB VBP
contaminated JJ VBN
CONTAMINATED JJ VBN
CONTAMINATION NN
cont'd. VBN
CONT'D. VBN
CONTEL NNP
contemplated VBN JJ VBD
CONTEMPLATED VBN VBD JJ
contemplates VBZ
CONTEMPLATES VBZ
contemplate VB VBP
CONTEMPLATE VB VBP
CONTEMPLATING VBG
CONTEMPLATION NN
CONTEMPORANEOUS JJ
CONTEMPORARIES NNS
CONTEMPORARY JJ NNP
contemporize VB
CONTEMPORIZE VB
CONTEMPTIBLE JJ
CONTEMPT NN
CONTEMPTUOUS JJ
contended VBD VBN
CONTENDED VBD VBN
CONTENDER NN
CONTENDERS NNS
CONTENDING VBG
contends VBZ
CONTENDS VBZ
contend VBP VB
CONTEND VBP VB
CONTE NNP
CONTENTED JJ
CONTENTION NN
CONTENTIONS NNS
CONTENTIOUS JJ
content NN JJ VB
CONTENT NN JJ VB
CONTENTS NNS
CONTESTANT NN
CONTESTANTS NNS
CONTESTED VBN JJ VBD
contested VBN VBD JJ
CONTESTING VBG
contest NN VB
CONTEST NN VB NNP
CONTESTS NNS
CONTEXT NN
CONTIGUOUS JJ
continental JJ
Continental NNP JJ
CONTINENTAL NNP JJ
Continentals NNS
CONTINENTALS NNS
CONTINENTIAL NNP
Continent NN NNP
CONTINENT NN NNP
CONTINGENCIES NNS
CONTINGENCY-FEE JJ
CONTINGENCY NN
contingent JJ NN
CONTINGENT JJ NN
CONTINOUSLY RB
continual JJ
CONTINUAL JJ
CONTINUALLY RB
CONTINUATION NN
continued VBD VBN JJ
CONTINUED VBD VBN JJ
Continued VBN JJ
continues VBZ
CONTINUES VBZ
continue VB VBP
CONTINUE VB VBP
CONTINUINGLY RB
continuing VBG JJ
CONTINUING VBG JJ NNP
Continuing VBG NNP
CONTINUITY NN
CONTINUOUS JJ
CONTINUOUSLY RB
CONTORTED JJ
contraceptive JJ NN
CONTRACEPTIVE JJ NN
CONTRACEPTIVES NNS
contract-drilling NN VBG
CONTRACT-DRILLING NN VBG
CONTRACTED-FOR JJ
contracted VBD VBN
CONTRACTED VBD VBN
contracting NN VBG
CONTRACTING NN VBG
Contracting VBG
CONTRACTION NN
CONTRACTIONS NNS
Contract NN NNP
contract NN VB VBP
CONTRACT NN VB VBP NNP
CONTRACTOR NN
Contractors NNS
CONTRACTORS NNS
Contracts NNS NNPS
contracts NNS VBZ NN
CONTRACTS NNS VBZ NN NNPS
CONTRACT-STEERING JJ
contractual JJ
CONTRACTUAL JJ
CONTRADICTING VBG
CONTRADICTION NN
CONTRADICTIONS NNS
contradictory JJ NN
CONTRADICTORY JJ NN
contradicts VBZ
CONTRADICTS VBZ
contradict VB
CONTRADICT VB
Contra NNP JJ
CONTRA NNP JJ
CONTRAPTION NN
contrarian JJ
CONTRARIAN JJ
Contrary JJ
contrary JJ NN
CONTRARY JJ NN
Contras NNPS NNP NNS
CONTRAS NNPS NNP NNS
contrasted VBN VBD
CONTRASTED VBN VBD
CONTRASTING VBG
contrast NN VBP VB
CONTRAST NN VB VBP
Contrasts NNS
contrasts VBZ
CONTRASTS VBZ NNS
contravened VBN
CONTRAVENED VBN
contribued VBD
CONTRIBUED VBD
contributed VBD VBN
CONTRIBUTED VBD VBN
contributes VBZ
CONTRIBUTES VBZ
contribute VB VBP
CONTRIBUTE VB VBP
Contributing VBG
contributing VBG JJ
CONTRIBUTING VBG JJ
CONTRIBUTION NN
CONTRIBUTIONS NNS
CONTRIBUTOR NN
CONTRIBUTORS NNS
CONTRIVED JJ
controlled VBN VBD JJ
CONTROLLED VBN VBD JJ
CONTROLLER NN
CONTROLLERS NNS
controlling VBG JJ NN
CONTROLLING VBG JJ NN
CONTROL NN NNP VB VBP JJ
Control NNP NN
control NN VB VBP JJ
control-room NN
CONTROL-ROOM NN
controls NNS VBZ
CONTROLS NNS VBZ NNP
controversial JJ
CONTROVERSIAL JJ
CONTROVERSIES NNS
CONTROVERSY NN
CONUNDRUM NN
CONVENANTS NNS
convened VBD VBN
CONVENED VBD VBN
convenes VBZ
CONVENES VBZ
convene VB VBP
CONVENE VB VBP
convenience-food NN
CONVENIENCE-FOOD NN
CONVENIENCE NN NNP JJ
Convenience NNP JJ
convenience-store NN
CONVENIENCE-STORE NN
convenient JJ
CONVENIENT JJ
CONVENIENTLY RB
CONVENING VBG
conventional-arms JJ NNS
CONVENTIONAL-ARMS JJ NNS
conventional JJ
Conventional JJ
CONVENTIONAL JJ
CONVENTIONERS NNS
convention-goers NNS
CONVENTION-GOERS NNS
CONVENTION NN NNP
Convention NNP NN
CONVENTIONS NNS
CONVENT NN
converged VBD
CONVERGED VBD
Conversation NN
CONVERSATION NN
CONVERSATIONS NNS
Conversely RB
CONVERSELY RB
CONVERSION NN NNP
CONVERSIONS NNS
converted VBN VBD JJ
CONVERTED VBN VBD JJ
CONVERTER NN
CONVERTERS NNS
CONVERTIBILITY NN
convertible JJ NN
CONVERTIBLE JJ NN NNP
Convertible JJ NNP
CONVERTIBLES NNS
CONVERTING VBG
converts VBZ NNS
CONVERTS VBZ NNS
convert VB VBP
CONVERT VB VBP
CONVEXITY NN
CONVEX NNP
CONVEYANCE NN
conveyed VBD
CONVEYED VBD
CONVEYOR NN
conveys VBZ
CONVEYS VBZ
convey VB VBP
CONVEY VB VBP
convicted VBN VBD
CONVICTED VBN VBD
Conviction NN
CONVICTION NN
CONVICTIONS NNS
CONVICTS VBZ
convict VB
CONVICT VB NNP
CONVINCED VBN JJ VBD VBN|JJ
convinced VBN JJ VBN|JJ VBD
convinces VBZ
CONVINCES VBZ
convince VB VBP
CONVINCE VB VBP
convincing JJ VBG NN
CONVINCING JJ VBG NN
CONVOCATION NN
convoluted JJ VBN
CONVOLUTED JJ VBN
CONVOLUTIONS NNS
CONVOY NN
CONVOYS NNS
CONVULSIONS NNS
CONWAY NNP
COOGAN NNP
COOKBOOK NN
COOKBOOKS NNS
cooked VBN
COOKED VBN
COOKE NNP
COOKIE NN
COOKIES NNS
cooking NN VBG JJ
COOKING NN VBG JJ
COOK NNP VB NN
cook NN VB
COOKS NNS
COOLANTS NNS
cooled VBN VBD
COOLED VBN VBD
cooler JJR NN
COOLER JJR NN
COOLING-OFF JJ
cooling VBG NN
COOLING VBG NN
COOLLY RB
cools VBZ
COOLS VBZ
Cool VB
cool VB JJ NN VBP
COOL VB JJ NN VBP
COOLY RB
cooperated VBD VBN
COOPERATED VBD VBN
cooperate VB VBP
COOPERATE VB VBP
COOPERATING VBG
COOPERATION NN
COOPERATION NN NNP
COOPERATIVE-CARE JJ
cooperative JJ NN
COOPERATIVE JJ NN NNP
COOPERATIVELY RB
CO-OPERATIVE NNP
COOPERATIVES NNS
COOPERMAN NNP
COOPER NNP
COOPERS NNP
co-op NN
Co-op NN
CO-OP NN
coordinated VBN
COORDINATED VBN
coordinates VBZ
COORDINATES VBZ
coordinate VB
COORDINATE VB
COORDINATING VBG NNP
COORDINATION NN
COORDINATOR NN
COOR NNP
Coors NNP NNS
COORS NNP NNS
co-owner NN
CO-OWNER NN
co-payments NNS
CO-PAYMENTS NNS
cope VB
COPE VB
COPIAGUE NNP
copied VBN VBD
COPIED VBN VBD
COPIER NN
COPIERS NNS
COPIES NNS
co-pilot NNS
CO-PILOT NNS
COPING VBG
COPIOUS JJ
COP-KILLER JJ
Coplandesque JJ
COPLANDESQUE JJ
COP NN
COPPER-BASED JJ
Copper NN NNP
COPPER NN NNP
COPPER-PRODUCING JJ
COPPER-RICH JJ
Copperweld NNP NN
COPPERWELD NNP NN
co-presidents NNS
CO-PRESIDENTS NNS
co-produce VB
CO-PRODUCE VB
co-production NN
CO-PRODUCTION NN
co-publisher NN
CO-PUBLISHER NN
COPYCATS NNS
copying NN VBG
COPYING NN VBG NNP
Copy NNP VBP
copy NN VB VBP
COPY NN VB VBP NNP
copyrighted VBN
COPYRIGHTED VBN
copyright NN JJ
COPYRIGHT NN NNP JJ
Copyright NNP NN
COPYRIGHTS NNS
CORAZON NNP
CORBEHEM NNP
CORCORAN NNP
CORDIS NNP
CORD NN
core NN JJ
CORE NN JJ NNP
CORES NNS
CoreStates NNP NNPS
CORESTATES NNP NNPS
COREY NNP
corinthian JJ
CORINTHIAN JJ
CORKSCREWS NNS
CORMACK NNP
CORN-BASED JJ
CORN-BUYING JJ
corneal JJ
CORNEAL JJ
CORNEA NN
CORNELL NNP
CORNEL NNP
CORNERED JJ VBN
cornered VBN JJ
corner NN VB JJ
CORNER NN VB JJ
Corners NNPS
CORNERS NNS NNPS
CORNERSTONE NN
CORNERSTONES NNS
CORNEY NNP
CORNFIELD NN
CORNFLAKE-SIZE JJ
CORNICES NNS
CORNING NNP
CORNISH NNP
CORN NN NNP
Corn NNP NN
CORNSTARCH NN
CORNUCOPIA NN
CORNWALL NNP
COROLLA NNP
Corollas NNPS
COROLLAS NNPS
CORONA NNP
CORONARY JJ
Coronets NNPS
CORONETS NNPS
CORP NNP
Corp. NNP NN
CORP. NNP NN
CORPORATE-BOND JJ
corporate-earnings NNS
CORPORATE-EARNINGS NNS
corporate-finance JJ NN
CORPORATE-FINANCE JJ NN
corporate JJ
CORPORATE JJ
Corporate JJ NNP
CORPORATE JJ NNP
CORPORATE-OWNED JJ
CORPORATE-SECURITIES JJ
CORPORATES NNS
corporatewide JJ
CORPORATE-WIDE JJ
CORPORATEWIDE JJ
CORPORATION NN NNP
Corporations NNS NNP
CORPORATIONS NNS NNP
CORPORATION-SOCIALIST JJ
CORPORATISM NN
CORPORATIST NN
CORPSE NN
corps NN FW
CORPS NNP NN FW
Corp.-Toyota JJ
CORP.-TOYOTA JJ
corpus NN
CORPUS NN
corral VB
CORRAL VB
CORRECTED VBN JJ VBD
corrected VBN VBD JJ
CORRECTING VBG
CORRECTION NN
CORRECTIONS NNS
CORRECTIVE JJ
correct JJ VB VBP
CORRECT JJ VB VBP
CORRECTLY RB
corrects VBZ
CORRECTS VBZ
correlate VBP
CORRELATE VBP
CORRELATION NN
CORRELL NNP
corresponded VBD
CORRESPONDED VBD
CORRESPONDENCE NN
CORRESPONDENT NN
CORRESPONDENTS NNS
corresponding JJ
CORRESPONDING JJ VBG
CORRESPONDINGLY RB
Corresponding VBG
correspond VB
CORRESPOND VB
CORRIDOR NN
CORRIDORS NNS
CORRIGAN NNP
CORR NNP
corroborate VBP
CORROBORATE VBP
CORROON NNP
CORROSION-RESISTANT JJ
CORRUGATED JJ
corrupting JJ
CORRUPTING JJ
CORRUPTION NN NNP
corrupt JJ
CORRUPT JJ NNP
CORRY NNP
CORSICA NNP
CORTESE NNP
CORTES NNP
CORTON-CHARLEMAGNE NNP
CORVETTE NNP
Corvettes NNS
CORVETTES NNS
COSBY NNP
COSGROVE-MEURER NNP
COSMAIR NNP
cosmetic JJ NN
COSMETIC JJ NN NNP
cosmetics-industry NN
COSMETICS-INDUSTRY NN
Cosmetics NNS NNPS
COSMETICS NNS NNPS
COSMETOLOGY NN
COSMIC JJ
COSMOLOGIES NNS
cosmopolitan JJ
COSMOPOLITAN JJ NNP
COSMOPULOS NNP
COSMOS NNP
Cos NNP NNPS
Cos. NNP NNPS
COS NNP NNPS
COS. NNP NNPS
co-sponsored JJ VBN
CO-SPONSORED JJ VBN
CO-SPONSORING JJ
co-sponsor NN VB
CO-SPONSOR NN VB
co-sponsors NNS
CO-SPONSORS NNS
COSSIGA NNP
Costa NNP JJ NNS
COSTA NNP JJ NNS
COSTANZA NNP
COST-BENEFIT JJ
COST-CONSCIOUS JJ
COST-CONTAINMENT JJ
COST-CONTROL JJ
cost-cutting JJ NN
COST-CUTTING JJ NN
Cost-effective JJ
COST-EFFECTIVE JJ
cost-efficiency NN
COST-EFFICIENCY NN
COSTING VBG
costlier JJR
COSTLIER JJR
costliest JJS
COSTLIEST JJS
costly JJ
Costly JJ
COSTLY JJ
Cost NN
cost NN VB VBD VBN VBP
COST NN VB VBD VBN VBP
cost-of-living JJ NN
COST-OF-LIVING JJ NN
COST-REDUCTION JJ
COST-SAVING JJ
cost-sharing NN JJ
COST-SHARING NN JJ
Costs NNS
costs NNS VBZ
COSTS NNS VBZ
costumed VBN
COSTUMED VBN
costume JJ NN
COSTUME NN JJ
COSTUMES NNS
COTE NNP
COTERIE NN
COTRAN NNP
COTS NNS
COTTAGE NN
COTTAGES NNS
COTTON-GINNING JJ
COTTON-GROWING JJ
COTTON NN NNP
Cotton NNP NN
COTTRELL NNP
couched VBN
COUCHED VBN
COUCHING VBG
COUCH NN
Couch-potato NN
COUCH-POTATO NN
COUDERT NNP
COUGAR NNP
COUGHED VBD VBN
coughed VBN VBD
COUGHING VBG
cough NN VB
COUGH NN VB
COUGHS NNS
could MD
Could MD
COULD MD
COUNCILMAN NN NNP
Council NNP NN
COUNCIL NNP NN
COUNCILORS NNS
COUNCILS NNS
COUNCILWOMAN NN NNP
counseled VBN
COUNSELED VBN
Counseling NN
counseling NN VBG
COUNSELING NN VBG
COUNSEL NN
COUNSEL NN NNP VB
counsel NN VB
COUNSELOR NN
COUNSELORS NNS
counsels VBZ
COUNSELS VBZ
COUNTDOWN NN
counted VBN VBD
COUNTED VBN VBD
countenance VB NN
COUNTENANCE VB NN
counteracted VBN
COUNTERACTED VBN
counteract VB
COUNTERACT VB
counter-argument NN
COUNTER-ARGUMENT NN
counterattack NN VB
COUNTERATTACK VB NN
counterbalanced VBN
COUNTERBALANCED VBN
COUNTERBIDDER NN
COUNTERBIDDERS NNS
COUNTERBID NN
COUNTERBIDS NNS
COUNTERCLAIM NN
counter-claims NNS
COUNTER-CLAIMS NNS
COUNTERCLAIMS NNS
countercultural JJ
COUNTERCULTURAL JJ
COUNTER-CYCLICAL JJ
counter-demand NN
COUNTER-DEMAND NN
Countered VBD
countered VBD VBN
COUNTERED VBD VBN
COUNTERESPIONAGE NN
COUNTERING VBG
COUNTER-INTELLIGENCE JJ
COUNTERMEASURES NNS
COUNTERMOVE NN
COUNTERPART NN
COUNTERPARTS NNS
Counterpoint NN
COUNTERPOINT NN
COUNTERPRODUCTIVE JJ
counterprogram VB
COUNTERPROGRAM VB
counterrevolutionary JJ NN
COUNTERREVOLUTIONARY JJ NN
COUNTERS NNS
countersued VBD VBN
COUNTERSUED VBD VBN
COUNTERSUING VBG
COUNTERSUIT NN
COUNTERTERRORISM NN
COUNTERTOP NN
COUNTER-TRADE JJ
COUNTERVAILING VBG
COUNTER VB NN RB VBP JJ NNP
counter VB RB NN VBP JJ
COUNTERWEIGHT NN
countess NN
COUNTESS NN
COUNTIES NNS
Counting VBG
counting VBG NN
COUNTING VBG NN
COUNTLESS JJ
count NN VB VBP
COUNT NN VB VBP
Countries NNPS NNP NNS
COUNTRIES NNS NNP NNPS
countrymen NNS
COUNTRYMEN NNS
COUNTRY NN NNP
Country NNP NN
COUNTRYSIDE NN
counts VBZ NNS
COUNTS VBZ NNS
Count VBP
COUNTY NNP NN
COUPE NN
COUPES NNP
coupled VBN
Coupled VBN
COUPLED VBN
Couple NN
couple NN JJ
COUPLE NN JJ
COUPLES NNS
COUPLETS NNS
coupling NN
COUPLING NN
coup-makers NNS
COUP-MAKERS NNS
coup NN FW
COUP NN FW
COUPON-EQUIVALENT JJ
couponing NN
COUPONING NN
Coupon NN
COUPON NN
Coupons NNS
COUPONS NNS
coup-planning NN
COUP-PLANNING NN
COUPS NNS
COURAGE NN
COURAGEOUS JJ
COURANT NNP
COURIER NN
COURIERS NNS
course-correction NN
COURSE-CORRECTION NN
coursed VBN
COURSED VBN
COURSE NN NNP
COURSES NNS
COURT-APPOINTED JJ
COURTAULDS NNP
courted VBN VBD
COURTED VBN VBD
COURTER NNP
COURTESAN NN
COURTESIES NNS
COURTESY NN
Courthouse NN
COURTHOUSE NN
COURTHOUSES NNS
COURTING VBG
COURTIS NNP
COURT NN NNP
COURT NN NNP VB
Court NNP NN
court NN VB
COURT-ORDERED JJ
COURT-REPORTING JJ
COURTROOM NN
COURTROOMS NNS
COURTSHIP NN
COURTS NNS
Courts NNS NNPS
courts NNS VBZ
COURTS NNS VBZ NNPS
COURTYARD NN
COUSIN NN
COUSINS NNS
COVAS NNP
COVELL NNP
COVENANT NN
COVENANTS NNS
COVENTRY NNP
co-venture NN
CO-VENTURE NN
COVERAGE NN NNP
COVERAGES NNS
covered VBN VBD JJ
COVERED VBN VBD JJ
COVERINGS NNS
covering VBG NN
COVERING VBG NN NNP
covers VBZ NNS
COVERS VBZ NNS
covert JJ
COVERT JJ NNP
COVERTLY RB
COVERTS NNS
cover-up NN
COVERUP NN
COVER-UP NN NNP
cover VB NN VBP
COVER VB NN VBP NNP
coveted JJ VBN
COVETED JJ VBN
COVETOUS JJ
covets VBZ
COVETS VBZ
COVEY NNP
COVIA NNP
COVINGTON NNP
COWAN NNP
cowardly JJ
COWARDLY JJ
COWARD NN
COWARDS NNS
COWBOY NN
Cowboys NNPS NNP NNS
COWBOYS NNPS NNS NNP
Cowboys-owned JJ
COWBOYS-OWNED JJ
COWEN NNP
cower VBP
COWER VBP
COW NN
co-workers NNS
CO-WORKERS NNS
COWS NNS
COX NNP
COXON NNP
coy JJ
COY JJ
COYOTE NN
cozy JJ
COZY JJ
CP486 CD NNP
CP486 NNP CD
CPAs NNS NNPS
CPAS NNS NNPS
CPC NNP
CPI NNP
C&P NNP
CPU NN
CRABB NNP
crabby JJ
CRABBY JJ
CRAB NN
CRABS NNP NNS
CRACKDOWN NN
cracked VBN VBD
CRACKED VBN VBD
CRACKER NN
Cracking VBG
CRACKING VBG
crackle VBP
CRACKLE VBP
CRACKS NNS
crack VB NN VBP
CRACK VB NN VBP
CRADLE NN
CRADLE-TO-GRAVE JJ
CRAF-CASSINI NNP
crafted VBN VBD
CRAFTED VBN VBD
CRAFTING VBG
craft NN VB
CRAFT NN VB
CRAFTON-PREYER NNP
Craftsmen NNPS
craftsmen NNS
CRAFTSMEN NNS NNPS
crafty JJ
CRAFTY JJ
CRAIG NNP
CRAMER NNP
crammed VBD
CRAMMED VBD
CRAMMING VBG
CRAMPED JJ
CRAMPS NNS
crams VBZ
CRAMS VBZ
CRANDALL NNP
CRANE NNP NN
crane-safety NN
CRANE-SAFETY NN
CRANES NNS
CRANING VBG
CRANKCASE NN
cranked VBD VBN
CRANKED VBD VBN
CRANKS NNS
crank VB
CRANK VB
CRA NNP
CRANSTON-D'AMATO NNP
CRANSTON-MITCHELL NNP
CRANSTON NNP
CRAP NN
CRAPSHOOT NN
CRARY NNP
crashed VBD
CRASHED VBD
crashes NNS VBZ
CRASHES NNS VBZ
Crashing VBG
CRASHING VBG
CRASHLET NN
Crash NNP NN
crash NN VB JJ
CRASH NN VB JJ NNP
crass JJ
CRASS JJ
CRATERING VBG
CRATES NNS
CRAVATH NNP
CRAVEN NNP
crave VBP
CRAVE VBP
craving NN
CRAVING NN
CRAWFORD NNP
CRAWFORDSVILLE NNP
crawled VBD
CRAWLED VBD
CRAWLING VBG
crawls VBZ
CRAWLS VBZ
crawl VB NN
CRAWL VB NN
Cray-3 NNP CD
CRAY-3 NNP CD
CRAY NNP
crazee JJ
CRAZEE JJ
CRAZE NN
crazy JJ
CRAZY JJ NNP
creak VB
CREAK VB
creamed VBN
CREAMED VBN
CREAMER NN
creamier JJR
CREAMIER JJR
CREAM NN NNP
CREAMS NNS
creamy JJ
CREAMY JJ
Created VBN
created VBN VBD
CREATED VBN VBD
creates VBZ
Creates VBZ
CREATES VBZ
Create VB
create VB VBP
CREATE VB VBP
CREATING VBG
creationist JJ
CREATIONIST JJ
Creation NN
CREATION NN
Creations NNPS
CREATIONS NNS NNPS
CREATIVE JJ
Creative JJ NNP
CREATIVE JJ NNP
CREATIVITY NN
CREATOR NN NNP
CREATOR'S NN
Creators NNS
CREATORS NNS
CREATURE NN
CREATURES NNS
CREDENCE NN
CREDENTIAL NN
CREDENTIALS NNS
Credibility NN
CREDIBILITY NN
CREDIBLE JJ
CREDITABLY RB
credit-backing NN
CREDIT-BACKING NN
CREDITBANK NNP
credit-card NN JJ
CREDIT-CARD NN JJ
credit-data NN|NNS
CREDIT-DATA NN|NNS
credit-easing NN JJ
CREDIT-EASING NN JJ
credited VBN VBD
CREDITED VBN VBD
credit-information NN
CREDIT-INFORMATION NN
CREDITING NN VBG
crediting VBG NN
CREDIT NN NNP VB VBP
Credit NNP NN
credit NN VBP VB
CREDITO NNP
CREDITOR NN
Creditors NNS
CREDITORS NNS
CREDIT-RATING JJ NN
credit-rating NN JJ
credit-ratings NNS
CREDIT-RATINGS NNS
CREDIT-REPORTING JJ
credits NNS VBZ
CREDITS NNS VBZ
credit-softening NN
CREDIT-SOFTENING NN
CREDITWATCH NNP
credit-worthiness NN
creditworthiness NN
CREDIT-WORTHINESS NN
CREDITWORTHINESS NN
CREDITWORTHY NN
CREDO NN
CREDULITY NN
creed NN
CREED NN
CREEK NNP
CREE NNP
creepiest JJS
CREEPIEST JJS
CREEPING VBG
CREMATION NN
CREMATORIUMS NNS
CREMONIE NNP
CREOLE NNP
crept VBD VBN
CREPT VBD VBN
CRESCENDO NN
CRESCOTT NNP
CRESSON NNP
CRESTED NNP
CRESTMONT NNP
CREST NNP NN VB
crest NN VB
CRESWELL NNP
Cretaceous JJ
CRETACEOUS JJ
CRETE NNP
CREVASSE NN
CREVASSES NNS
CREVICES NNS
CREWCUT NN
CREWMEMBERS NNP
CREW NN NNP
crew-rest NN
CREW-REST NN
CREWS NNS
crib NN JJ
CRIB NN JJ
CRICKET NN
CRIER NNP
cries VBZ
CRIES VBZ
CRIME-BUSTING JJ
CRIME\/COMEDY NN
CRIME-FIGHTING JJ
CRIME-INFESTED JJ
CRIME NN
Crime NN NNP
CRIME NN NNP
CRIME-RIDDEN JJ
CRIMES NNS
CRIMINALITY NN
criminalize VB
CRIMINALIZE VB
CRIMINAL JJ
criminal JJ NN
CRIMINAL JJ NN NNP
criminal-justice NN
CRIMINAL-JUSTICE NN
criminal-law NN
CRIMINAL-LAW NN
Criminal NNP JJ
CRIMINALS NNS
CRIMINOLOGY NN
CRIMPED JJ
CRIMPING VBG
crimp VB
CRIMP VB
crimson JJ
CRIMSON JJ
cringed VBD
CRINGED VBD
CRI NNP
crippled VBN JJ
CRIPPLED VBN JJ
cripple-maker NN
CRIPPLE-MAKER NN
CRIPPLES NNS
Crippling JJ
crippling JJ VBG
CRIPPLING JJ VBG
CRISANTI NNP
CRISCO NNP
Crises NNS
CRISES NNS
crisis-management NN
CRISIS-MANAGEMENT NN
crisis NN
CRISIS NN
CRISMAN NNP
CRISPER NN
CRISPIN NNP
crisp JJ
CRISP JJ NNP
CRISSCROSSING VBG
criss-cross VBP
CRISS-CROSS VBP
CRISTAL NNP
CRISTIANI NNP
criteria NNS
CRITERIA NNS
CRITERION NN NNP
Critical JJ
CRITICAL JJ NNP
CRITICALLY RB
Criticism NN NNP
CRITICISM NN NNP
CRITICISMS NNS NNP
criticized VBN VBD
CRITICIZED VBN VBD
criticizes VBZ
CRITICIZES VBZ
criticize VB VBP
CRITICIZE VB VBP
CRITICIZING VBG
critic NN
CRITIC NN
Critics NNS
CRITICS NNS
CRITIQUE NN
C.R. NNP
CROAKER NN
croak VBP
CROAK VBP
CROCIDOLITE NN
CROISSANTS NNS
CROISSIER NNP
CROIX NNP
CROMA NNP
CROMWELL NNP
CRONIES NNS
CRONKITE NNP
CRONYISM NN
CROOKED JJ
CROOKERY NN
CROOK NN
CROOKS NNS
crooned VBD
CROONED VBD
CROONEN NNP
croons VBZ
CROONS VBZ
crop NN VB
CROP NN VB
CROPPED VBD VBN
cropped VBN VBD
CROPPING VBG
CROPS NNS
CROSBIE NNP
CROSBY NNP
CROSSAIR NNP
CROSS-BAY JJ
CROSS-BLENDING JJ
CROSS-BORDER JJ
CROSS-BRED VBD
CROSS-CONNECT JJ
crossed VBN VBD
CROSSED VBN VBD
CROSSE NNP
crosses VBZ
CROSSES VBZ
CROSSFIRE NN NNP
CROSS-FUNCTIONAL JJ
CROSSING VBG
CROSSLAND NNP
cross-licensing NN
CROSS-LICENSING NN
cross-margining NN
CROSS-MARGINING NN
CROSS-MARKET JJ
CROSS NNP VB NN VBP JJ
cross NN VB VBP JJ
cross-ownership NN
CROSS-OWNERSHIP NN
cross-pollinated VBN
CROSS-POLLINATED VBN
cross-pollination NN
CROSS-POLLINATION NN
CROSS-PURCHASE JJ
CROSSROADS NNS
cross-section NN
CROSS-SECTION NN
cross-shareholdings NNS
CROSS-SHAREHOLDINGS NNS
CROSS-STATE JJ
Crotale JJ
CROTALE JJ
crotchety JJ
CROTCHETY JJ
crouched VBD
CROUCHED VBD VBN
Crouched VBN
CROUCH NN
crowded VBN JJ VBD
CROWDED VBN JJ VBD
CROWD NN NNP VBP
Crowd NNP NN
crowd NN VBP
crowds NNS VBZ
CROWDS NNS VBZ
crowed VBN
CROWED VBN
CROWELL NNP
CROWE NNP
CROWLEY NNP
crowned VBN
CROWNED VBN
crowning JJ
CROWNING JJ
CROW NN
CROWN NNP NN
CROWNTUFT NNP
crows VBZ
CROWS VBZ
CROZIER NNP
CRRES NNP
CRS NNP NNS
CRs NNS
crucial JJ
Crucial JJ
CRUCIAL JJ
CRUCIALLY RB
crucible NN
CRUCIBLE NN
Crude JJ NNP NN
crude NN JJ
CRUDE NN JJ NNP
crude-oil NN JJ
CRUDE-OIL NN JJ
CRUDES NNS
crude-steel NN
CRUDE-STEEL NN
crudest JJS
CRUDEST JJS
cruel JJ
CRUEL JJ
CRUELTY NNP
CRUISE NN NNP VBP
Cruise NNP NN
cruise NN VBP
CRUISER NN
CRUISERS NNS
cruise-ship NN
CRUISE-SHIP NN
CRUISING VBG
crumbled VBD VBN
CRUMBLED VBD VBN
crumbles VBZ
CRUMBLES VBZ
crumble VB
CRUMBLE VB
CRUMBLING VBG
CRUM NNP
CRUMPLED JJ VBD VBN
crumpled VBN VBD JJ
CRUMP NNP
crunched VBD
CRUNCHED VBD
crunchier JJR
CRUNCHIER JJR
CRUNCH NN VB
Crunch VB
CRU NNP
Crusade NN
CRUSADE NN
CRUSADER NNP NN
Crusaders NNPS
CRUSADERS NNPS
crushed VBN JJ
CRUSHED VBN JJ
crushes VBZ
CRUSHES VBZ
CRUSHING VBG
crush NN VB
CRUSH NN VB
CRUST NN
crusty JJ
CRUSTY JJ
CRUTCHER NNP
CRUTCH NN
CRUTZEN NNP
CRUZADO NN
CRUZ NNP
CRYING VBG
cry NN VBP VB
CRY NN VB VBP
CRYPTOGRAPHERS NNS
crystal-lattice JJ NN
CRYSTAL-LATTICE NN JJ
crystalline JJ
CRYSTALLINE JJ
CRYSTAL NN NNP
CRYSTALS NNS
CSC NNP
CSFB NNP
C-S NNP
C.S. NNP
CS NNP
C-SPAN NNP
CSS NNP
CST NNP
CSV NNP
CSX NNP
c SYM NN LS
CTB NNP
CTBS NNP
CUAUHTEMOC NNP
Cuban JJ NNP
CUBAN JJ NNP
CUBA NNP
Cubans NNPS
CUBANS NNPS
CUBE NN NNP
CUBIC JJ
CUB NN
CUBS NNP NNS
CUCAMONGA NNP
Cuckoo NN
CUCKOO NN
CUCKOOS NNS
CUCUMBER NN
CUDDEFORD NNP
CUDDLES NNP
CUELLAR NNP
CUE NN
CUES NNS
cuff VB
CUFF VB
CUISINE NN NNP
culled VBN
CULLED VBN
CULLEN\/FROST NNP
CULLINET NNP
CULLOWHEE NNP
CULMINATED VBD VBN
culminated VBN VBD
culminates VBZ
CULMINATES VBZ
CULMINATING VBG
CULMINATION NN
CUL NN
CULPABLE JJ
CULPA NNP
CULPRIT NN
CULPRITS NNS
cultivated VBN
CULTIVATED VBN
cultivates VBZ
CULTIVATES VBZ
CULTIVATING VBG
CULTIVATION NN
Cult NN NNP
CULT NN NNP
cultural JJ
CULTURAL JJ NNP
Cultural NNP JJ
cultural-reform NN
CULTURAL-REFORM NN
CULTURE NN NNP
CULTURES NNS
CULVER NNP
cumbersome JJ
CUMBERSOME JJ
CUMIN NN
CUMMINS NNP
CUMULATIVE JJ
CUMULATIVELY RB
CUNIN NNP
CUNNINGHAM NNP
cunning JJ
CUNNING JJ
CUOMO NNP
Cupboard NN
CUPBOARD NN
CUPERTINO NNP
CUP NNP NN
CUPS NNS
CUP-TOTE NNP
CURATOR NN
CURATORS NNS
curbed VBN VBD
CURBED VBN VBD
CURBING VBG
CURBS NNS
Curb VB
curb VB NN
CURB VB NN
CURCIO NNP
CURDLING NNP
cured VBN
CURED VBN
CURES NNS
cure VB NN
CURE VB NN
CURING VBG
CURIOSITY NN
CURIOUS JJ
CURIOUSLY NNP RB
Curiously RB NNP
curled VBD
CURLED VBD
CURLEY NNP
curl VB
CURL VB
curly JJ
CURLY JJ
CURRAN NNP
CURRENCIES NNS
CURRENCNY NN
CURRENCY-EXCHANGE JJ
CURRENCY NN NNP
Currency NNP NN
CURRENT-ACCOUNT JJ
CURRENT-CARRYING JJ
CURRENT-COUPON JJ
CURRENT-GENERATION JJ
current JJ NN
CURRENT JJ NN NNP
Current JJ NNP
Currently RB NNP
CURRENTLY RB NNP
CURRENTS NNS
CURRICULUM NN
CURRIER NNP
CURRY NNP VB
curry VB
cursed VBD
CURSED VBD
CURSE NN
CURSES NNS
cursing NN
CURSING NN
curtailed VBN VBD
CURTAILED VBN VBD
CURTAILING VBG
CURTAILMENT NN
curtail VB VBP
CURTAIL VB VBP
CURTAIN NN NNP
CURTAINS NNS
CURTIN NNP
CURTIS NNP
CURTLY RB
curtness NN
CURTNESS NN
CURT NNP
CURVE NN
curvy JJ
CURVY JJ
CURZIO NNP
cushioned VBN
CUSHIONED VBN
cushioning NN VBG
CUSHIONING NN VBG
cushion NN VB
CUSHION NN VB
CUSHMAN NNP
custodial JJ
CUSTODIAL JJ
CUSTODY NN
Customarily RB
CUSTOMARILY RB
CUSTOMARY JJ
CUSTOM-CHIP JJ
CUSTOM-DESIGNED JJ
custom-die NN
CUSTOM-DIE NN
Customer-access NN
CUSTOMER-ACCESS NN
CUSTOMER-DRIVEN JJ
Customer NN
CUSTOMER NN
CUSTOMER-SERVICE JJ
Customers NNS
CUSTOMERS NNS
Customized JJ
customized VBN JJ
CUSTOMIZED VBN JJ
CUSTOM-MADE JJ
CUSTOM NN NNP
customs-clearance NN
CUSTOMS-CLEARANCE NN
Customs NNP NNS
CUSTOMS NNS NNP
CUSTOM-TAILORED JJ
CUTBACK NN
CUTBACKS NNS NNP
cute JJ
CUTE JJ
CUTLASS NNP
CUTLER NNP
CUTOFF NN
CUTOUTS NNS
CUT-RATE JJ
CUTRER NNP
cuts NNS VBZ
CUTS NNS VBZ
CUTTERS NNS
cutthroat JJ
CUTTHROAT JJ
cutting-tools NNS
CUTTING-TOOLS NNS
Cutting VBG
CUTTING VBG NN JJ VBG|NN
cutting VBG NN VBG|NN JJ
CUTTY NNP
Cut VB NNP
cut VB NN VBN VBD VBP JJ
CUT VB NN VBN VBD VBP JJ NNP
CUVEES NNS
CUYAHOGA NNP
CVB NNP
CVN NNP
CWA NNP
C.W. NNP
C-word NN
C-WORD NN
CYANAMID NNP
CYANIDE-LACED JJ
cyan JJ
CYBER NNP
Cycads NNS
CYCADS NNS
CYCLE NN NNP
CYCLES NNS
CYCLICAL JJ
CYCLICALS NNS
CYCLING NN NNP VBG
cycling NN VBG
CYCLIST NN
CYCLISTS NNS
CYCLONE NNP
cyclosporine NN JJ
CYCLOSPORINE NN JJ
CYD NNP
c-Yields NNS
C-YIELDS NNS
CYLINDER NN
CYNICAL JJ
CYNICALLY RB
CYNICISM NN
CYNIC JJ
CY NNP
CYNTHIA NNP
CYNWYD NNP
CYPRESS NNP
CYPRUS NNP
CYRUS NNP
CZAR NN
CZARS NNS
Czech JJ NNP
CZECH JJ NNP
CZECHOSLOVAKIA NNP
Czechoslovak JJ
CZECHOSLOVAK JJ
Czechoslovaks NNPS
CZECHOSLOVAKS NNPS
Czechs NNPS
CZECHS NNPS
CZESLAW NNP
dabbled VBD
DABBLED VBD
dabble VB
DABBLE VB
DABBLING VBG
DABNEY NNP
dabs VBZ
DABS VBZ
DADA NN NNP
DADE NNP
d'Administration NNP
D'ADMINISTRATION NNP
DAD NNP NN
DAE NNP
DAEWOO NNP
Daffynition NN NNP
DAFFYNITION NN NNP
DAF NNP
DAGGS NNP
D'AGOSTO NNP
DAHLEN NNP
DAHL NNP
DAIEI NNP
DAIGNAULT NNP
DAIHATSU NNP
DAI-ICHI NNP
DAIKIN NNP
DAILIES NNS
DAILY JJ NNP RB NN
daily JJ RB NN
Daily NNP JJ RB
DAIMLER-BENZ NNP
DAIMLER NNP
DAIM NNP
DAIN NNP
Dain-sponsored JJ
DAIN-SPONSORED JJ
DAIRY NN
DAISY NNP
Daiwa NNP NN
DAIWA NNP NN
DAKOTA NNP
Dakotas NNPS
DAKOTAS NNPS
DALAI NNP
DALBAR NNP
d'Alene NNP
D'ALENE NNP
DALE NNP
DALEY NNP
DALI NNP
DALIS NNPS
DALKON NNP
DALLARA NNP
DALLAS-BARCELONA NNP
Dallas-based JJ
DALLAS-BASED JJ
DALLAS NNP
DALLDORF NNP
DALLIANCES NNS
DALTON NNP
DALY NNP
damaged VBN JJ VBD
DAMAGED VBN JJ VBD
Damage NN
damage NN VB VBP
DAMAGE NN VB VBP
damages NNS VBZ
DAMAGES NNS VBZ
damaging JJ VBG
DAMAGING JJ VBG
DAMASCUS NNP
D'AMATO NNP
DAME NNP
d'Amiante NNP
D'AMIANTE NNP
D'AMICO NNP
damned RB
DAMNED RB
DAM NN
DAMN RB JJ NN UH
damn RB UH NN JJ
DAMN-THE-TORPEDOES JJ
DAMONNE NNP
DAMON NNP
damped VBN VBP
DAMPED VBN VBP
dampened VBD
DAMPENED VBD
dampen VB
DAMPEN VB
DAMPER NN
DAMPING VBG
damp VB JJ VBP
DAMP VB JJ VBP
DAMS NNS
DANA-FARBER NNP
DANA NNP
DANBURY NNP
DANCE-COMMITTEE JJ
Dance NN NNP
dance NN VB
DANCE NN VB NNP
DANCER NN
DANCERS NNS
DANCES NNS
dancing NN VBG
DANCING NN VBG
dandy JJ
DANDY JJ
DANFORTH NNP
DANGER NN
Dangerous JJ
DANGEROUS JJ
DANGEROUSLY RB
Dangers NNS
DANGERS NNS
dangled VBN
DANGLED VBN
dangling VBG JJ
DANGLING VBG JJ
DANG NNP
DANIEL NNP
DANIELS NNP
DANILO NNP
Danish JJ
DANISH JJ
DANNEMILLER NNP
DAN NNP
da NNP NN
DA NNP NN
DANNY NNP
DANUBE NNP
DANVERS NNP
DANVILLE NNP
DANZIG NNP
dapper JJ
DAPPER JJ
DAPUZZO NNP
DARALEE NNP
DARBY NNP
D'ARCY NNP
dared VBD
DARED VBD
DAREMBLUM NNP
dare VB VBP MD
DARE VB VBP MD
DARIEN NNP
daring JJ
DARING JJ
DARIN NNP
DARK-BLUE JJ
darker JJR
DARKER JJR
DARKHORSE NNP
dark JJ NN
DARK JJ NN NNP
Dark JJ NNP
DARKLY RB
Darkness NN
DARKNESS NN
DARKROOM NN
DARK-SQUARED JJ
DARLA NNP
darling NN
DARLING NN
DARLINGS NNS
DARLINGTON NNP
DARLIN NNP
DARLOW NNP
DARMAN NNP
DARMAN'S NNP
darned RB
DARNED RB
DARPA NNP
DARRELL NNP
Dartboard NN
DARTBOARD NN
DARTH NNP
DARTMOUTH NNP
DART NN
darts NN
DARTS NN
dart-throwing NN
DART-THROWING NN
Darwinian JJ
DARWINIAN JJ
DARWIN NNP
DASHBOARD NN
dashed VBN VBD
DASHED VBN VBD
DASHES NNS
DASHIELL NNP
DASH NN NNP VB
dash NN VB
DASSAULT-BREGUET NNP
Dassault NNP NN
DASSAULT NNP NN
Dass FW
DASS FW
DATABASE NN
DATABASES NNS
Data NNP NNPS NNS
data NNS NN NN|NNS NNS|NN
DATA NNS NNP NN NN|NNS NNS|NN NNPS
DATAPOINT NNP
data-processing NN JJ
DATA-PROCESSING NN JJ
Dataproducts NNP NNPS
DATAPRODUCTS NNP NNPS
DATAQUEST NNP
DATA-SERVICE JJ
data-storage JJ NN
DATA-STORAGE JJ NN
DATA-STORING JJ
DATATIMES NNP
data-transmission NN
DATA-TRANSMISSION NN
DATATRONIC NNP
dated VBN JJ
DATED VBN JJ
Date NN
date NN VBP VB
DATE NN VB VBP
dates NNS VBZ
DATES NNS VBZ
DATING VBG NNP
DAT NNP
DATSON NNP
DATUK NNP
DAUCHY NNP
DAUGHERTY NNP
DAUGHTER NN
DAUGHTERS NNS
daunted VBD
DAUNTED VBD
daunting JJ VBG
DAUNTING JJ VBG
Dave NNP JJ
DAVE NNP JJ
DAVENPORT NNP
DAVIDGE NNP
DAVID NNP
DAVIDOW NNP
DAVIDS NNP
DAVIDSON NNP
DAVIES NNP
DAVIS NNP
DAVISON NNP
DAVIS\/ZWEIG NNP
DAVY NNP
DAWDLING VBG
DAWKINS NNP
DAWNING VBG
DAWN NN
dawns VBZ
DAWNS VBZ
DAX NNP
DAYAC NNP
DAYBREAK NN NNP
DAY-BY-DAY JJ
day-care NN JJ
DAY-CARE NN JJ
DAYLIGHT NN NNP
DAY-LONG JJ
DAYNA NNP
DAY NN NNP
Day NNP NN
days. NN NNS
DAYS. NN NNS
days NNS NN
DAYS NNS NN NNPS
Days NNS NNPS
daytime JJ
DAYTIME JJ
DAY-TO-DAY JJ
DAY-TODAY JJ
DAYTONA NNP
DAYTON NNP
DAYWATCH NNP
DAZE NN NNP
dazzled VBN
DAZZLED VBN
dazzling JJ
DAZZLING JJ
DBL NNP
D&B NNP NN
DC10-30 NN
DC-10 NNP
DC-8-62 NN
DC-9 NNP
D.C.-based JJ
D.C.-BASED JJ
D.C NNP
D.C. NNP
DDB NNP
DDG-51 NNP
DDI NNP
DD NNP
DEACON NNP
deactivates VBZ
DEACTIVATES VBZ
DEADBEATS NNS
DEAD-EYED JJ
dead JJ NN RB VBN
DEAD JJ RB NN NNP VBN
deadliest JJS
DEADLIEST JJS
DEADLINE NN
DEADLINES NNS
deadlocked VBN JJ
DEADLOCKED VBN JJ
DEADLOCK NN
deadly JJ
DEADLY JJ
DEADWOOD NN
Deafening VBG
DEAFENING VBG
deaf JJ
DEAF JJ
DEAK NNP
DEALER-COMMUNITY JJ
DEALER-LED JJ
dealer-manager NN
DEALER-MANAGER NN
DEALER NN
DEALERSHIP NN
DEALERSHIPS NNS
Dealers NNS NNPS NNP
DEALERS NNS NNPS NNP
DEALER-TO-DEALER JJ
DEALINGS NNS
Dealing VBG
dealing VBG NN
DEALING VBG NN
DEALMAKERS NNS
deal-making NN
DEAL-MAKING NN
Deal NNP NN
deal NN VB VBP
DEAL NN VB VBP NNP
deals NNS VBZ
DEALS NNS VBZ
dealt VBN VBD
DEALT VBN VBD
DEANE NNP
DEAN NNP NN
DEA NNP NN
DEARBORN NNP
DEARIE NNP
DEARLY RB
DEAR NNP RB
dear RB
Dear RB
DEARTH NN
DEATH-BACKED JJ
DEATH-BENEFIT JJ
Death NN NNP
DEATH NN NNP
death-penalty NN JJ
DEATH-PENALTY NN JJ
death-row NN
DEATH-ROW NN
death-sentence NN
DEATH-SENTENCE NN
DEATHS NNS NNP
DEAVER NNP
DEBACLE NN
DEBACLES NNS
DEBAKEY NNP
DEBASEMENT NN
DEBATABLE JJ
debated VBN
DEBATED VBN
Debate NN
debate NN VB
DEBATE NN VB
Debates NNS
DEBATES NNS
DEBATING VBG
DEBAT NNP
Debenture NN NNP
DEBENTURE NN NNP
DEBENTURES NNS
debilitating JJ
DEBILITATING JJ
DEB NNP
DEBORAH NNP
DEBORA NNP
debris NN
DEBRIS NN
Debt-Burdened JJ
DEBT-BURDENED JJ
DEBT-COVERAGE JJ
debt-equity JJ NN
DEBT-EQUITY JJ NN
DEBT-FINANCED JJ
debt-for-environment NN
DEBT-FOR-ENVIRONMENT NN
Debt-free JJ
DEBT-FREE JJ
DEBT-HAPPY JJ
DEBT-HEAVY JJ
DEBTHOLDERS NNS
DEBT-LADEN JJ
debt-limit NN
DEBT-LIMIT NN
DEBT NN
DEBT NN NNP
Debt NNP NN
debtor NN JJ
DEBTOR NN JJ
DEBTORS NNS
DEBT-RATING JJ
debt-reduction NN
DEBT-REDUCTION NN
DEBT-RIDDEN JJ
DEBT-SERVICE JJ
DEBTS NNS
DEBT-TO-ASSETS JJ
DEBT-TO-EQUITY JJ
debunk VB
DEBUNK VB
DEBUSSY NNP
debuted VBD
DEBUTED VBD
debut NN VB
DEBUT NN VB
DECADE-LONG JJ
DECADENCE NN
DECADE NN
decadent JJ
DECADENT JJ
Decades NNS
DECADES NNS
DECADES-OLD JJ
decapitalize VBP
DECAPITALIZE VBP
DECATUR NNP
DECAY NN
deceased JJ VBN
DECEASED JJ VBN
DECEDENT NN
deceived VBD VBN
DECEIVED VBD VBN
deceive VB
DECEIVE VB
decelerated VBN
DECELERATED VBN
DECELERATING VBG
DECEMBER NNP
DECENCY NN
decent JJ
Decent JJ
DECENT JJ
DECENTRALIZATION NN
decentralized JJ VBN
DECENTRALIZED JJ VBN
DECENTRALIZING VBG
DECEPTION NN
DECEPTIVE JJ
decertified VBN
DECERTIFIED VBN
DECIDEDLY RB
decided VBD VBN
DECIDED VBD VBN
decides VBZ
DECIDES VBZ
Decide VB
decide VB VBP
DECIDE VB VBP
Deciding VBG
deciding VBG JJ
DECIDING VBG JJ
decimal JJ NN
DECIMAL NN JJ
decimated VBN
DECIMATED VBN
decision-makers NNS
DECISION-MAKERS NNS
decision-making NN JJ
DECISION-MAKING NN JJ
DECISION NN
Decisions NNS
DECISIONS NNS
DECISIVE JJ
DECISIVELY RB
decisiveness NN
DECISIVENESS NN
decked VBN
DECKED VBN
DECKER NNP
DECKHANDS NNS
DECKING VBG
DECK NN
DECKS NNS
DECLAN NNP
DECLARATION NN NNP
DECLARATIONS NNS
declaratory JJ
DECLARATORY JJ
declared VBD VBN
DECLARED VBD VBN
declares VBZ
DECLARES VBZ
declare VB VBP
DECLARE VB VBP
Declaring VBG
DECLARING VBG
declasse JJ
DECLASSE JJ
DECLASSIFYING VBG
declined VBD VBN
DECLINED VBD VBN
decline NN VB VBP
DECLINE NN VB VBP
Decliners NNS
DECLINERS NNS
Declines NNS
declines NNS VBZ
DECLINES NNS VBZ
Declining VBG JJ
declining VBG JJ NN
DECLINING VBG JJ NN
DEC NNP
Dec. NNP NN VB
DEC. NNP NN VB
DECOMMISSONED JJ
DECONCINI NNP
DECONSTRUCTED JJ
decontaminated VBN
DECONTAMINATED VBN
DECONTROL NN
decorated VBN
Decorated VBN
DECORATED VBN
DECORATION NN
DECORATIVE JJ
DECORATOR NN
DECORATORS NNS
DECOR NN
DECORUM NN
DECOY NN
DECOYS NNS
decreased VBD VBN
DECREASED VBD VBN
decreases NNS VBZ
DECREASES NNS VBZ
decrease VB NN VBP
DECREASE VB NN VBP
DECREASING VBG
decreed VBN
DECREED VBN
DECREE NN
decribed VBD
DECRIBED VBD
decried VBD
DECRIED VBD
decries VBZ
DECRIES VBZ
DECRYING VBG
DEDERICK NNP
DEDHAM NNP
dedicated VBN JJ VBD
DEDICATED VBN JJ VBD
Dedication NN
DEDICATION NN
deduces VBZ
DEDUCES VBZ
deducted VBN
DEDUCTED VBN
DEDUCTIBILITY NN
DEDUCTIBLE JJ
DEDUCTIBLES NNS
DEDUCTING VBG
DEDUCTION NN
Deductions NNS
DEDUCTIONS NNS
deduct VB
DEDUCT VB
DEEDS NNS
deemed VBN VBD
DEEMED VBN VBD
de-emphasized VBN
DE-EMPHASIZED VBN
de-emphasize VB
DE-EMPHASIZE VB
deems VBZ
DEEMS VBZ
deem VBP
DEEM VBP
DEE NNP
DEEP-DISCOUNT JJ
deepened VBD
DEEPENED VBD
DEEPENING VBG
Deeper JJR
deeper JJR RBR
DEEPER JJR RBR
deepest JJS
DEEPEST JJS
Deep JJ NNP
deep JJ RB
DEEP JJ RB NNP
Deeply RB
DEEPLY RB
DEEP-POCKETED JJ
DEEP-SEATED JJ
DEERE NNP
DEERFIELD NNP
deer NNS
Deer NNS
DEER NNS
DE-FACTO JJ
DEFAMATION NN
defamatory JJ
DEFAMATORY JJ
DEFAULTED VBD JJ VBN
defaulted VBD VBN JJ
DEFAULTERS NNS
DEFAULTING VBG
default NN VB
DEFAULT NN VB NNP
Defaults NNS
DEFAULTS NNS
DEFAULT_TAG: 
DEFAZIO NNP
defeated VBN VBD
DEFEATED VBN VBD
DEFEATING VBG
defeat NN VB
DEFEAT NN VB
defeats VBZ NNS
DEFEATS VBZ NNS
defected VBD
DEFECTED VBD
DEFECTING VBG
DEFECTION NN
Defections NNS
DEFECTIONS NNS
DEFECTIVE JJ
Defect NN
defect NN VB
DEFECT NN VB
DEFECTS NNS
DEFENDANT NN
Defendants NNS
DEFENDANTS NNS
defended VBD VBN
DEFENDED VBD VBN
DEFENDER NN
Defenders NNS
DEFENDERS NNS
Defending VBG
DEFENDING VBG
defends VBZ
DEFENDS VBZ
defend VB VBP
DEFEND VB VBP
defense-electronics JJ NNS
DEFENSE-ELECTRONICS JJ NNS
DEFENSE-EQUIPMENT JJ
DEFENSELESS JJ
DEFENSE NN
DEFENSE NN NNP
Defense NNP NN
DEFENSE-ORIENTED JJ
defense-procurement NN
DEFENSE-PROCUREMENT NN
DEFENSE-RELATED JJ
DEFENSES NNS
defense-suppression NN
DEFENSE-SUPPRESSION NN
DEFENSIBLE JJ
defensive JJ NN
DEFENSIVE JJ NN
DEFENSIVELY RB
defensiveness NN
DEFENSIVENESS NN
DEFERENCE NN
DEFERRED JJ
DEFERRED JJ VBN
deferred VBN JJ
DEFERRING VBG
defer VB
DEFER VB
DEFIANCE NN
DEFIANTLY RB
DEFICIENCIES NNS
DEFICIENCY NN
deficit-cutting JJ NN
DEFICIT-CUTTING JJ NN
deficitcutting NN
DEFICITCUTTING NN
DEFICIT NN
DEFICIT-RACKED JJ
deficit-reduction NN JJ
DEFICIT-REDUCTION NN JJ
DEFICIT-RIDDEN JJ
DEFICITS NNS
defied VBD
DEFIED VBD
defies VBZ
DEFIES VBZ
defined VBN VBD
DEFINED VBN VBD
defines VBZ
DEFINES VBZ
define VB
DEFINE VB
Defining VBG
DEFINING VBG
definite JJ
DEFINITE JJ
DEFINITELY RB
DEFINITION NN
DEFINITIONS NNS
DEFINITIVE JJ
DEFINITIVELY RB
deflated VBN VBD
DEFLATED VBN VBD
deflate VB
DEFLATE VB
DEFLATIONARY JJ
DEFLATOR NN
DEFLATORS NNS
deflected VBD
DEFLECTED VBD
DEFLECTING VBG
deflect VB
DEFLECT VB
deformed VBN
DEFORMED VBN
defrauded VBD VBN
DEFRAUDED VBD VBN
DEFRAUDING VBG
defraud VB
DEFRAUD VB
DEFTLY RB
defunct JJ VB
DEFUNCT JJ VB
defuse VB
Defuse VB
DEFUSE VB
DEFYING VBG
defy VBP
DEFY VBP
degenerated VBD VBN
DEGENERATED VBD VBN
degenerate VB
DEGENERATE VB
DEGENERATIVE JJ
DEGOL NNP
DEGRADATION NN
DEGRADED JJ
degrading JJ
DEGRADING JJ
DEGREE NN
DEGREES NNS
DEHUMIDIFIED JJ
dei FW
DEI FW
DEJA NN
DELAMURAZ NNP
DELANEY NNP
DELAWARE NNP
Delayed JJ
delayed VBN VBD JJ
DELAYED VBN VBD JJ
delaying VBG NN|VBG
DELAYING VBG NN|VBG
DELAY NN VB NNP VBP
delay NN VB VBP
delays NNS VBZ
DELAYS NNS VBZ
DELAYS VBZ
Del.-based JJ
DEL.-BASED JJ
DELBERT NNP
DELCHAMPS NNP
DELCO NNP
DELEAGE NNP
DELECTABLE JJ
DELECTABLY RB
delegate NN VB
DELEGATE NN VB NNP
Delegates NNPS NNS
DELEGATES NNS NNPS
DELEGATING VBG
DELEGATION NN
deleted VBN
DELETED VBN
DELETERIOUS JJ
delete VB
DELETE VB
DELETING VBG
DELETION NN
DELETIONS NNS
del FW DT NNP
DELHI NNP
deliberate JJ VB
DELIBERATE JJ VB
DELIBERATELY RB
DELIBERATING VBG
DELIBERATION NN
DELIBERATIONS NNS
DELIBERATIVE JJ
DELICACY NN
delicate JJ
DELICATE JJ
DELICATELY RB
DELICIOUS NNP JJ
delighted JJ VBN VBD
DELIGHTED JJ VBN VBD
DELIGHTFUL JJ
DELIGHTFULLY RB
delight NN VB
DELIGHT NN VB VBP
delights VBZ
DELIGHTS VBZ
DELIGHT VBP
de-linkage NN
DE-LINKAGE NN
deli NNS
DELI NNS
DELINQUENCIES NNS
DELINQUENCY NN
delinquent JJ
DELINQUENT JJ
DELINQUENTS NNS
DELIRIOUSLY RB
delisted VBN
DELISTED VBN
delisting NN
DELISTING NN
delivered VBN VBD
DELIVERED VBN VBD
Deliveries NNS
deliveries NNS NN
DELIVERIES NNS NN
DELIVERING VBG
delivers VBZ
DELIVERS VBZ
Deliver VB
deliver VB VBP
DELIVER VB VBP
Delivery NN
DELIVERY NN
DELLA NNP
DELL NNP
DELLUMS NNP
DELMED NNP
DELMONT NNP
DEL. NNP
DEL NNP FW DT
DELOITTE NNP
DELOITTE-TOUCHE NNP
DELORS NNP
DELOUSING VBG
DELPHI NNP
Deltacorp NNP NN
DELTACORP NNP NN
delta NN JJ
Delta NNP NN
DELTA NNP NN JJ
DELTEC NNP
DELUGED VBD VBN
deluged VBN VBD
DELUGE NN
DELUSION NN
deluxe JJ
DELUXE JJ
delved VBN
DELVED VBN
DELVER NN
delves VBZ
DELVES VBZ
delving NN
DELVING NN
DELWIN NNP
DEMAGOGIC JJ
DEMAGOGUERY NN
DEMAGOGUES NNS
demanded VBD VBN
DEMANDED VBD VBN
demanding VBG JJ
DEMANDING VBG JJ
Demand NN
demand NN VB VBP
DEMAND NN VB VBP
DEMAND-RELATED JJ
demands NNS VBZ
DEMANDS NNS VBZ
demeaned VBN
DEMEANED VBN
demeaning JJ
DEMEANING JJ
DEMEANOR NN
DEMEANORS NNS
DEMENTIA NN
demilitarize VB
DEMILITARIZE VB
DEMINEX NNP
DEMISE NN
DEMLER NNP
DEMME NNP
demobilize VB
DEMOBILIZE VB
DEMOBILIZING VBG
DEMOCRACIES NNS
DEMOCRACY NN NNP
Democracy NNP NN
DEMOCRATICALLY RB
Democratic-controlled JJ
DEMOCRATIC-CONTROLLED JJ
Democratic JJ NNP
DEMOCRATIC JJ NNP
Democratization NN
DEMOCRATIZATION NN
democratized VBN
DEMOCRATIZED VBN
democratize VB
DEMOCRATIZE VB
DEMOCRAT NNP
Democrats NNPS NNS NNP
DEMOCRATS NNPS NNS NNP
DEMOGRAPHICALLY RB
DEMOGRAPHIC JJ
Demographics NNS
DEMOGRAPHICS NNS
DEMOGRAPHY NN
demolished VBN VBD
DEMOLISHED VBN VBD
DEMOLISHING VBG
demolish VB
DEMOLISH VB
DEMOLITION NN
DEMONIC JJ
demonized VBN
DEMONIZED VBN
demonizing NN
DEMONIZING NN
DEMO NN
DEMON NN
DEMONOLOGIST NN
DEMONS NNS
demonstrated VBN VBD
DEMONSTRATED VBN VBD
demonstrates VBZ
DEMONSTRATES VBZ
demonstrate VB VBP
DEMONSTRATE VB VBP
DEMONSTRATING VBG
DEMONSTRATION NN
Demonstrations NNS
DEMONSTRATIONS NNS
demonstrativeness NN
DEMONSTRATIVENESS NN
DEMONSTRATORS NNS
DEMORALIZED JJ
demoted VBN
DEMOTED VBN
DEMOTION NN
DEMOULIN NNP
DEMPSEY NNP
DEMUNN NNP
demurs VBZ
DEMURS VBZ
denationalized VBN
DENATIONALIZED VBN
DENENCHOFU NNP
DENG NNP
DENIAL NN
DENIALS NNS
denied VBD VBN
DENIED VBD VBN
Denied VBN
denies VBZ
DENIES VBZ
DENIGRATION NN
DENIMS NNS
DENISE NNP
DENIS NNP
Denizens NNS
DENIZENS NNS
DENLEA NNP
DENMARK NNP
DENNEHY NNP
DENNIS NNP
DEN NN NNP
de NNP FW IN JJ
DE NNP FW IN JJ
DENNY NNP
denominated VBN
DENOMINATED VBN
DENOMINATION NN
DENOMINATIONS NNS
DENOMINATOR NN
denounced VBD VBN
DENOUNCED VBD VBN
denounce VBP VB
DENOUNCE VBP VB
DENOUNCING VBG
DENREES NNP
dense JJ
DENSE JJ
DENSITY NN
dental JJ
DENTAL JJ
DENTIST NN
DENTISTRY NNP
DENTISTS NNS
DENT NN
DENTON NNP
DENTS NNS
DENTSU NNP
denuclearized VBN
DENUCLEARIZED VBN
denude VB
DENUDE VB
Denver-based JJ
DENVER-BASED JJ
DENVER NNP
DENYING VBG
deny VB VBP
DENY VB VBP
DEODORANT NN
DEOXYRIBONUCLEIC JJ
departed VBD
DEPARTED VBD
Departing VBG
DEPARTING VBG
Department NNP NN
DEPARTMENT NNP NN
Departments NNP NNPS
DEPARTMENTS NNS NNP NNPS
department-store NN JJ
DEPARTMENT-STORE NN JJ
DEPARTMENTSTORE NNP
Departure NN
DEPARTURE NN
DEPARTURES NNS
DEPART VBP VB
depart VB VBP
depended VBD VBN
DEPENDED VBD VBN
DEPENDENCE NN
DEPENDENCY NN
dependent JJ
DEPENDENT JJ
DEPENDENTS NNS
Depending VBG
DEPENDING VBG
depends VBZ
DEPENDS VBZ
depend VB VBP
DEPEND VB VBP
depicted VBN
DEPICTED VBN
Depicting VBG
DEPICTING VBG
DEPICTION NN
depicts VBZ
DEPICTS VBZ
DEPICT VBP VB
depict VB VBP
depleted VBN VBD
DEPLETED VBN VBD
depletes VBZ
DEPLETES VBZ
deplete VB
DEPLETE VB
DEPLETION NN
DEPLORABLE JJ
deplores VBZ
DEPLORES VBZ
DEPLORING VBG
DEPLOYABLE JJ
deployed VBN VBD
DEPLOYED VBN VBD
DEPLOYMENT NN NNP
DEPORTATION NN
deported VBD
DEPORTED VBD
deposed VBN
DEPOSED VBN
depositary JJ NN NN|JJ
DEPOSITARY JJ NN NNP NN|JJ
Depositary NNP JJ
DEPOSITED VBD VBN
deposited VBN VBD
DEPOSITING VBG
DEPOSITIONS NNS
DEPOSIT NN NNP
DEPOSIT NN NNP VB
Deposit NNP NN
deposit NN VB
DEPOSITORS NNS
depository NN JJ
DEPOSITORY NN JJ
DEPOSITS-A NNP
Deposits NNS NNPS
deposits NNS VBZ
DEPOSITS NNS VBZ NNPS
DEPOT NNP NN
DEPOTS NNS
DEPRECIABLE JJ
depreciated VBD
DEPRECIATED VBD
DEPRECIATION NN
DEPREDATIONS NNS
DEPRESSANT NN
depressed VBN JJ VBD
DEPRESSED VBN JJ VBD
depresses VBZ
DEPRESSES VBZ
depressing JJ VBG
DEPRESSING JJ VBG
Depression-era JJ
DEPRESSION-ERA JJ
DEPRESSION NN NNP
Depression NNP NN
DEPRESSIONS NNS
depress VB VBP
DEPRESS VB VBP
DEPRIVATION NN
DEPRIVATIONS NNS
DEPRIVED VBN VBD VBN|JJ
deprived VBN VBN|JJ VBD
deprives VBZ
DEPRIVES VBZ
deprive VB
DEPRIVE VB
DEPRIVING VBG
DEPROGRAMMINGS NNS
DEPTH NN
DEPTHS NNS
DEPT. NNP
Deputies NNS NNPS
DEPUTIES NNS NNPS
deputy NN JJ
DEPUTY NN JJ NNP
derailed VBN
DERAILED VBN
DERAILING VBG
derail VB
DERAIL VB
DERBY NN NNP
DERCHIN NNP
deregulated VBN
DEREGULATED VBN
deregulate VB
DEREGULATE VB
Deregulation NN
DEREGULATION NN
DEREGULATON NN
DEREK NNP
DERELICTION NN
DEREL NNP
DERIDED VBD VBN
derided VBN VBD
DERISION NN
DERISIVELY RB
DERIVATION NN
derivative JJ NN
DERIVATIVE JJ NN
DERIVATIVES NNS
derived VBN VBD
DERIVED VBN VBD
derives VBZ
DERIVES VBZ
derive VB
DERIVE VB
DERIVING VBG
DERMATOLOGICAL JJ
der NN JJR NNP
DER NNP NN JJR
DEROGATION NN
derogatory JJ
DEROGATORY JJ
DERRIERE NN
derring-do NN
DERRING-DO NN
DERR NNP
DERYCK NNP
DESAI NNP
DESARROLLO NNP
DESCENDANT NN
Descendants NNS
DESCENDANTS NNS
descended VBD
DESCENDED VBD
DESCENDING VBG
descends VBZ
DESCENDS VBZ
DESCENT NN
DESCENTS NNS
DESCENZA NNP
DESC NNP
described VBD VBN
DESCRIBED VBD VBN
describes VBZ
DESCRIBES VBZ
describe VB VBP
DESCRIBE VB VBP
Describing VBG
DESCRIBING VBG
DESCRIPTION NN
DESCRIPTIONS NNS
DESCRIPTIVE JJ
DESECRATION NN
DESE NNP
DESERET NNP
DESERT-BATTLE JJ
deserted VBN
DESERTED VBN
DESERT NN NNP VB
desert NN VB
DESERTS NNS
deserved VBD
DESERVED VBD
deserves VBZ
DESERVES VBZ
deserve VBP VB
DESERVE VBP VB
deserving JJ
DESERVING JJ
DESHENG NNP
designated VBN
DESIGNATED VBN NNP
designate JJ VB
designates VBZ
DESIGNATES VBZ
DESIGNATE VB JJ
DESIGNATING VBG
DESIGNATION NN
DESIGNATIONS NNS
designed VBN VBD
DESIGNED VBN VBD
DESIGNEES NNS
Designer NN
DESIGNER NN
DESIGNERS NNS
DESIGNING VBG NNP
Design NNP NN
design NN VB
DESIGN NN VB NNP
Designs NNS
designs NNS VBZ
DESIGNS NNS VBZ
DESIRABLE JJ
desired VBN VBD
DESIRED VBN VBD
Desire NN
desire NN VBP
DESIRE NN VBP
DESIRES NNS
desist VB
DESIST VB
DESK NN
DESKS NNS
DESK-TOP JJ
desktop NN JJ
DESKTOP NN JJ NNP
DESMOND NNP
des NNP FW
DES NNP FW
desolate JJ
DESOLATE JJ
DESOTO NN NNP
DeSoto NNP NN
despairing JJ
DESPAIRING JJ
Despair NN
DESPAIR NN
despairs VBZ
DESPAIRS VBZ
desperate JJ
Desperate JJ
DESPERATE JJ
Desperately RB
DESPERATELY RB
DESPERATION NN
DESPICABLE JJ
despised VBN
DESPISED VBN
despise VB
DESPISE VB
despite IN
Despite IN
DESPITE IN
DESPONDENCY NN
DESPOTS NNS
dessert-menu NN
DESSERT-MENU NN
DESSERT NN
destabilize VB
DESTABILIZE VB
destabilizing JJ VBG
DESTABILIZING JJ VBG
DESTEC NNP
DESTINATION NN
Destinations NNS
DESTINATIONS NNS
destined VBN
DESTINED VBN
DESTINY NN
destitute JJ
DESTITUTE JJ
de-stocking NN
DE-STOCKING NN
destroyed VBN VBD
DESTROYED VBN VBD
DESTROYER NN
DESTROYING VBG
destroys VBZ
DESTROYS VBZ
destroy VB VBP
DESTROY VB VBP
DESTRUCTION NN NNP
DESTRUCTIVE JJ
desultory JJ
DESULTORY JJ
detached VBN
Detached VBN
DETACHED VBN
detailed JJ VBN
DETAILED JJ VBN
DETAILING VBG
DETAIL NN
DETAILSMAN NN
Details NNS NNP
DETAILS NNS NNP
detained VBD VBN
DETAINED VBD VBN
DETAINING VBG
DETECTABLE JJ
detected VBD VBN
DETECTED VBD VBN
DETECTING VBG
detective NN
DETECTIVE NN
DETECTIVES NNS
detective-story NN
DETECTIVE-STORY NN
DETECTOR NN
DETECTORS NNS
detect VB VBP
DETECT VB VBP
DETENTE NN
DETENTION NN
DETERGENT NN
DETERGENTS NNS
DETERIORATED VBN JJ VBD
deteriorated VBN VBD JJ
deteriorates VBZ
DETERIORATES VBZ
DETERIORATE VBP VB
deteriorate VB VBP
deteriorating VBG JJ
DETERIORATING VBG JJ
DETERIORATION NN
DETERMINATION NN
determined VBN VBD JJ
DETERMINED VBN VBD JJ
determines VBZ
DETERMINES VBZ
determine VB VBP
DETERMINE VB VBP
Determining VBG
DETERMINING VBG
deterrant JJ
DETERRANT JJ
deterred VBD
DETERRED VBD
DETERRENCE NN
DETERRENT NN
DETERRENTS NNS
DETERRING VBG
deters VBZ
DETERS VBZ
deter VB VBP
DETER VB VBP
detests VBZ
DETESTS VBZ
dethroned VBN
DETHRONED VBN
DETOUR NN
DETOXIFICATION NN
DETRACTORS NNS
detracts VBZ
DETRACTS VBZ
detract VB
DETRACT VB
d'etre FW
D'ETRE FW
DETREX NNP
detrimental JJ
DETRIMENTAL JJ
DETRIMENT NN
Detroit-based JJ
DETROIT-BASED JJ
DETROIT NNP
Detroit-over-San JJ
DETROIT-OVER-SAN JJ
Detroit-to-Tokyo JJ
DETROIT-TO-TOKYO JJ
DEUKMEJIAN NNP
DEUTERIUM NN
Deutsche NNP FW
DEUTSCHE NNP NN FW
deux FW
DEUX FW
DEVALUATION NN
DEVALUATIONS NNS
devalued VBN VBD
DEVALUED VBN VBD
DEVANS NNP
DEVARIO NNP
DEVASTATED JJ VBN VBD
devastated VBN JJ VBD
devastating JJ VBG
DEVASTATING JJ VBG
DEVASTATINGLY RB
Devastation NN
DEVASTATION NN
Developed VBN
developed VBN VBD JJ
DEVELOPED VBN VBD JJ
DEVELOPER NN NNP
Developers NNS NNP
DEVELOPERS NNS NNP
DEVELOPING-COUNTRY JJ
Developing VBG
developing VBG JJ NN
DEVELOPING VBG JJ NN
DEVELOPMENT NN NNP
Developments NNPS NNP NNS
DEVELOPMENTS NNS NNPS NNP
develops VBZ
DEVELOPS VBZ
Develop VB
develop VB VBP
DEVELOP VB VBP
DEVESA NNP
deviant JJ
DEVIANT JJ
deviated VBD
DEVIATED VBD
DEVIATION NN
DEVIATIONS NNS
Device NN
DEVICE NN
Devices NNPS NNP
DEVICES NNS NNPS NNP
DEVILLARS NNP
DEVILLE NNP
DEVILS NNS
DEVIOUS JJ
devised VBN VBD
DEVISED VBN VBD
devises VBZ
DEVISES VBZ
devise VB VBP
DEVISE VB VBP
DEVOE NNP
devoid JJ
DEVOID JJ
DEVON NNP
DEVOTEDLY RB
devoted VBN JJ VBD
DEVOTED VBN JJ VBD
Devotees NNS
DEVOTEES NNS
devotes VBZ
DEVOTES VBZ
devote VB VBP
DEVOTE VB VBP
devotional JJ
DEVOTIONAL JJ
DEVOTION NN
devoured VBN
DEVOURED VBN
DEVOURING VBG
devout JJ
DEVOUT JJ
DEWAR NNP
DEWATERING VBG
DEWHURST NNP
DEWITT NNP
DEW NN
DEW-SODDEN JJ
d'Exploitation NNP
D'EXPLOITATION NNP
DEXTERITY NN
DFC NNP
DGAULT NNP
DG NNP
d'Harnoncourt NNP
D'HARNONCOURT NNP
DHAWK NNP
D.H. NNP
diabetes NN
DIABETES NN NNP
DIABETIC NNP
DIABETICS NNS
DIAGHILEV NNP
DIAGNOSED VBD VBN
diagnosed VBN VBD
DIAGNOSING VBG
diagnosis NN
DIAGNOSIS NN
DIAGNOSTIC JJ NNP
Diagnostics NNPS
DIAGNOSTICS NNS NNPS
DIAGRAMMING VBG
DIAGRAM NN
DIALECTS NNS
dialing VBG NN
DIALING VBG NN NNP
DIALING VBG NNP
dial NN VB
DIAL NN VB
DIALOGUE NN
DIALS NNS
dial-tone NN
DIAL-TONE NN
dialysis NN
DIALYSIS NN
DIAMANDIS NNP
DIAMETER NN
DIAMOND NNP NN
DIAMONDS NNS
DIAMOND-STAR NNP
DIANA NNP
DIANE NNP
DIAN NNP
DIAPER NN
DIAPER NN NNP
Diaper NNP NN
DIAPERS NNS
DIARIES NNS
DIARRHEA NN
diary NN
DIARY NN NNP
DIASONICS NNP
DIAZEPAM NN
DIAZ NNP
DIBENZOFURANS NNS
DICARA NNP
dice NNS
DICE NNS
DICEON NNP
DICHOTOMY NN
DICKENS NNP
dickered VBD
DICKERED VBD
dickering NN
DICKERING NN
DICKINSON NNP
DICK NNP
DICKS NNP
Dictaphone NNP NN
DICTAPHONE NNP NN
dictated VBN VBD
DICTATED VBN VBD
Dictates NNS
dictates VBZ
DICTATES VBZ NNS
dictate VBP VB
DICTATE VB VBP
dictating NN
DICTATING NN
Dictation NN
DICTATION NN
dictatorial JJ
DICTATORIAL JJ
DICTATOR NN
DICTATORSHIP NN
DICTATORSHIPS NNS
DICTATORS NNS
DICTIONARY NNP
DICTUM NN
DIDACTIC JJ
DIDION NNP
did VBD
Did VBD
DID VBD
DIEBEL NNP
DIED VBD
died VBD VBN
DIED VBD VBN
Died VBN VBD
Diego-based JJ
DIEGO-BASED JJ
Diego NNP JJ
DIEGO NNP JJ
DIE-HARD JJ
die-hards NNS
Diehards NNS
DIE-HARDS NNS
DIEHARDS NNS
DIEPPE NNP
diesel NN JJ
DIESEL NN JJ NNP
DIESELS NNS
dies VBZ
Dies VBZ
DIES VBZ
DIETER NNP
DIETHYLSTILBESTROL NN
dieting NN
DIETING NN
DIET NN NNP
Die VBP VB
die VB VBP NN
DIE VB VBP NN
differed VBD
DIFFERED VBD
DIFFERENCE NN
Differences NNS
DIFFERENCES NNS
differential NN JJ
DIFFERENTIAL NN JJ
DIFFERENTIALS NNS
DIFFERENTIATED JJ
differentiate VB
DIFFERENTIATE VB
DIFFERENTIATING VBG
different JJ
Different JJ NNP
DIFFERENT JJ NNP
DIFFERENTLY RB
DIFFERING VBG
differs VBZ
DIFFERS VBZ
differ VB VBP
DIFFER VB VBP
DIFFICULTIES NNS
difficult JJ
DIFFICULT JJ
DIFFICULTY NN
di FW NNP
DIGATE NNP
diGenova NNP
DIGENOVA NNP
digested VBN
DIGESTED VBN
DIGESTING VBG
DIGEST NNP VB
digest VB
digging NN VBG
DIGGING NN VBG
digital JJ
DIGITAL NNP JJ NN
Digital NNP NN
DIGITS NNS
DIGNIFIED JJ
dignify VB
DIGNIFY VB
DIGNITARIES NNS
DIGNITY NN
DIG NNP VB NN
dig NN VB
DIGS NNS
DIGS NNS VBZ
digs VBZ NNS
DILAPIDATED JJ
DILEMMA NN
DILENSCHNEIDER NNP
DILEO NNP
DILIGENCE NN
DILLARD NNP
DILLER NNP
DILLMANN NNP
DILL NNP
DILLON NNP
DILLOW NNP
DILORENZO NNP
DILORETO NNP
diluted VBN JJ VBD VBN|JJ
DILUTED VBN JJ VBD VBN|JJ
dilute VB
DILUTE VB
DILUTING VBG
DILUTION NN
DILUTIVE JJ
DILZEM NNP
DIME NNP NN
DIMENSION NN
DIMENSIONS NNS
DIMES NNS
diming NN
DIMING NN
diminished VBN JJ VBD
DIMINISHED VBN JJ VBD
diminishes VBZ
DIMINISHES VBZ
DIMINISHING VBG
diminish VB VBP
DIMINISH VB VBP
DIMINUTION NN
DIMINUTIVE JJ
DIMLY RB
DIMMING VBG
DINED VBD VBN
dined VBN VBD
DINERS NNS
DINGELL NNP
dining NN VBG
DINING NN VBG
dinkiest JJS
DINKIEST JJS
DINKINS NNP
DINNER NN
DINNERS NNS
DI NNP FW
DINOSAUR NN
DINOSAURS NNS
DINSA NNP
DIONNE NNP
DIOXIDE NN
DIOXINS NNS
DIPHTHERIA NN
DIPLOMACY NN
DIPLOMA NN
DIPLOMATICALLY RB
Diplomatic JJ
DIPLOMATIC JJ
DIPLOMAT NN
DIPLOMATS NNS
DIPOTASSIUM NN
dipped VBD VBN
DIPPED VBD VBN
DIPPING VBG
DIPS NNS
Dip VB
dip VB NN
DIP VB NN
directed VBN VBD
DIRECTED VBN VBD NNP
directing VBG NN
DIRECTING VBG NN
DIRECT-INVESTMENT JJ
DIRECTIONLESS JJ
Direction NN
DIRECTION NN
DIRECTIONS NNS
directive NN
DIRECTIVE NN
DIRECTIVES NNS
DIRECT JJ VB NNP RB
direct JJ VB RB
DIRECTLY RB
Direct-mail JJ
direct-mail JJ NN
DIRECT-MAIL JJ NN
direct-mail-mogul NN
DIRECT-MAIL-MOGUL NN
DIRECTMAIL NN
direct-marketing NN
DIRECT-MARKETING NN
Direct NNP JJ
Directorate NNP NN
DIRECTORATE NNP NN
director-general NN
DIRECTOR-GENERAL NN
directorial JJ
DIRECTORIAL JJ
DIRECTORIES NNS
DIRECTOR NN NNP
Director NNP NN
DIRECTORSHIP NN
Directors NNS NNPS
DIRECTORS NNS NNPS
DIRECTORY NN
DIRECTORY NN NNP
direct-seller NN
DIRECT-SELLER NN
DIRECT-SELLING JJ
direct-steelmaking NN
DIRECT-STEELMAKING NN
directs VBZ
DIRECTS VBZ
Dire JJ
dire JJ FW
DIRE JJ FW
DIRK NNP
Dirks NNP NNS
DIRKS NNP NNS
dirtiest JJS
DIRTIEST JJS
DIRT NN
dirty JJ
DIRTY JJ
Disabilities NNPS NNP
DISABILITIES NNS NNPS NNP
DISABILITY NN
Disabled JJ
disabled JJ VBN
DISABLED JJ VBN
disabled-workers NNS
DISABLED-WORKERS NNS
DISABLING VBG
DISADVANTAGED JJ
DISADVANTAGE NN
DISADVANTAGES NNS
DISAFFECTED JJ
DISAFFECTION NN
DISAFFILIATION NN
DISAGREEABLE JJ
disagreed VBD VBN
DISAGREED VBD VBN
DISAGREEMENT NN
DISAGREEMENTS NNS
disagrees VBZ
DISAGREES VBZ
disagree VBP VB
DISAGREE VBP VB
disallowed VBD
DISALLOWED VBD
DISAPPEARANCE NN
disappeared VBD VBN
DISAPPEARED VBD VBN
disappears VBZ
DISAPPEARS VBZ
disappear VB VBP
DISAPPEAR VB VBP
disappointed VBN JJ VBD
DISAPPOINTED VBN JJ VBD
disappointing JJ
Disappointing JJ
DISAPPOINTING JJ
DISAPPOINTINGLY RB
Disappointment NN
DISAPPOINTMENT NN
Disappointments NNS
DISAPPOINTMENTS NNS
disappoint VB
DISAPPOINT VB
DISAPPROVAL NN
disapproved VBN VBD
DISAPPROVED VBN VBD
disapproves VBZ
DISAPPROVES VBZ
disapprove VBP
DISAPPROVE VBP
disapproving JJ
DISAPPROVING JJ
DISARMAMENT NN
DISARMINGLY RB
DISARMING VBG
disarm VB
DISARM VB
DISARRAY NN
disassemble VB
DISASSEMBLE VB
disassociate VB
DISASSOCIATE VB
DISASTER-ASSISTANCE JJ
disaster-contingency NN
DISASTER-CONTINGENCY NN
Disaster NN
DISASTER NN
DISASTER-PRONE JJ
DISASTER-RECOVERY JJ NN
disaster-recovery NN JJ
Disasters NNS
DISASTERS NNS
DISASTROUS JJ
DISASTROUSLY RB
disavowed VBD
DISAVOWED VBD
disbanded VBN
DISBANDED VBN
disbanding VBG NN
DISBANDING VBG NN
disband VB
DISBAND VB
DISBELIEF NN
disbursed VBN
DISBURSED VBN
DISBURSEMENT NN
DISBURSEMENTS NNS
discarded VBN VBD
DISCARDED VBN VBD
discard VB
DISCARD VB
DISCERNIBLE JJ
discerning JJ
DISCERNING JJ
discerns VBZ
DISCERNS VBZ
discern VB
DISCERN VB
discharged VBN
DISCHARGED VBN
discharge NN VB
DISCHARGE NN VB
DISCHARGES NNS
DISCIMINATION NN
DISCIPLES NNS
DISCIPLINARY JJ NN
DISCIPLINARY NN
disciplined VBN JJ VBD
DISCIPLINED VBN JJ VBD
DISCIPLINE NN
DISCIPLINING VBG
disclaims VBZ
DISCLAIMS VBZ
disclosed VBN VBD JJ
DISCLOSED VBN VBD JJ
discloses VBZ
DISCLOSES VBZ
disclose VB
DISCLOSE VB
DISCLOSING VBG
DISCLOSURE NN
Disclosures NNS
DISCLOSURES NNS
DISC NN NNP
discolored VBN
DISCOLORED VBN
DISCOMBOBULATION NN
DISCOMFITED JJ
discomfit VB
DISCOMFIT VB
DISCOMFORT NN
DISCO NN
disconnected VBN JJ
DISCONNECTED VBN JJ
disconnect VB
DISCONNECT VB
DISCONTENT NN
DISCONTINUANCE NN
DISCONTINUATION NN
discontinued VBN JJ
DISCONTINUED VBN JJ
discontinue VB
DISCONTINUE VB
DISCONTINUING VBG
discordant JJ
DISCORDANT JJ
DISCORD NN
Discos NNS
DISCOS NNS
DISCOTHEQUE NN
discount-borrowing NN
DISCOUNT-BORROWING NN
discount-coupon NN
DISCOUNT-COUPON NN
Discounted VBN JJ
discounted VBN VBD JJ
DISCOUNTED VBN VBD JJ
DISCOUNTER NN
discounting NN VBG
DISCOUNTING NN VBG
Discount JJ
DISCOUNT NN JJ NNP VB
discount NN JJ VB
DISCOUNT NN NNP JJ
discount-retailing NN
DISCOUNT-RETAILING NN
discounts NNS VBZ
DISCOUNTS NNS VBZ
DISCOUNT-TOY JJ
DISCOURAGED VBN JJ VBD
discouraged VBN VBD JJ
Discouragement NN
DISCOURAGEMENT NN
discourages VBZ
DISCOURAGES VBZ
discourage VB VBP
DISCOURAGE VB VBP
discouraging VBG JJ
DISCOURAGING VBG JJ
DISCOURSE NN
discovered VBN VBD
DISCOVERED VBN VBD
DISCOVERIES NNS
DISCOVERING VBG
discovers VBZ
DISCOVERS VBZ
discover VB VBP
DISCOVER VB VBP NNP
DISCOVERY NN NNP
DISCOVISION NNP
discredited VBN JJ
DISCREDITED VBN JJ
discrediting NN
DISCREDITING NN
discredit VB
DISCREDIT VB
discreet JJ
DISCREET JJ
DISCREETLY RB
Discrepancies NNS
DISCREPANCIES NNS
DISCREPANCY NN
DISCREPENCIES NNS
discrete JJ
DISCRETE JJ
DISCRETIONARY JJ
DISCRETION NN
discriminate JJ
DISCRIMINATE JJ
DISCRIMINATING VBG
DISCRIMINATION NN
discriminatory JJ
DISCRIMINATORY JJ
DISCS NNS
discussed VBN VBD
DISCUSSED VBN VBD
Discussing VBG
DISCUSSING VBG
DISCUSSION NN
DISCUSSIONS NNS
discuss VB VBP
DISCUSS VB VBP
DISDAINING VBG
disdain NN VB
DISDAIN NN VB
DISEASED JJ
DISEASE NN NNP
Disease NNP NN
DISEASE-RESISTANT JJ
DISEASES NNS
disembark VBP
DISEMBARK VBP
DISEMBODIED JJ
disenchanted JJ VBN
DISENCHANTED JJ VBN
disengage VB
DISENGAGE VB
DISFAVOR NN
DISGORGEMENT NN
disgorge VB
DISGORGE VB
DISGRACEFUL JJ
Disgrace NN
DISGRACE NN
disgruntled JJ VBN
DISGRUNTLED JJ VBN
disguised VBN JJ
DISGUISED VBN JJ
DISGUISES NNS
disguise VB
DISGUISE VB
disgusted JJ VBN
Disgusted VBN
DISGUSTED VBN JJ
disgusting JJ
DISGUSTING JJ
DISGUST NN
DISHES NNS
DISHEVELED JJ
dish NN VB
DISH NN VB
dishonest JJ
DISHONEST JJ
DISHONESTLY RB
Dishonesty NN
DISHONESTY NN
DISHONORABLE JJ
DISHWASHER NN
DISHWASHERS NNS
DISILLUSIONMENT NN
DISINCLINED JJ VBN
disinclined VBN JJ
DISINFECTANTS NNS
DISINFLATIONARY JJ
DISINFLATION NN
DISINGENUOUS JJ
disintegrated VBD
DISINTEGRATED VBD
DISINTEGRATING VBG
DISINTEGRATION NN
DISINTERESTED JJ
disk-drive NN
DISK-DRIVE NN
Disk NN
DISK NN
DISKS NNS
DISK\/TREND NNP
DISLIKED JJ
dislike NN VBP VB
DISLIKE NN VBP VB
dislikes NN VBZ
DISLIKES VBZ NN
DISLOCATION NN
DISLOCATIONS NNS
disloyal JJ
DISLOYAL JJ
DISLOYALTY NN
dismal JJ
Dismal JJ
DISMAL JJ
dismantled VBN
DISMANTLED VBN
dismantle VB
Dismantle VB
DISMANTLE VB
DISMANTLING VBG
dismayed JJ VBN
DISMAYED JJ VBN
dismaying JJ
DISMAYING JJ
DISMAY NN
dismember VB
DISMEMBER VB
DISMISSAL NN
dismissed VBD VBN
DISMISSED VBD VBN
dismisses VBZ
DISMISSES VBZ
Dismissing VBG
DISMISSING VBG
dismiss VB VBP
DISMISS VB VBP
DISNEYLAND NNP
DISNEY NNP
DISOBEDIENCE NN
disobey VB
DISOBEY VB
disorderly JJ
Disorderly JJ
DISORDERLY JJ
DISORDER NN
DISORDERS NNS
DISORGANIZED JJ
disparaged VBD
DISPARAGED VBD
disparage VB
DISPARAGE VB
DISPARAGING VBG
disparate JJ
DISPARATE JJ
DISPARITIES NNS
DISPARITY NN
dispatched VBD VBN
DISPATCHED VBD VBN
DISPATCHERS NNS
DISPATCHES NNS
DISPATCHING VBG
dispatch VB NN
DISPATCH VB NN
dispelled VBD
DISPELLED VBD
dispel VB
DISPEL VB
DISPENSATION NN
dispensed VBD
DISPENSED VBD
DISPENSE VBP VB
dispense VB VBP
DISPENSING VBG
DISPERSANT NN
DISPERSANTS NNS
dispersed VBD
DISPERSED VBD
DISPERSING VBG
displaced VBN
DISPLACED VBN
displace VB
DISPLACE VB
displacing NN
DISPLACING NN
DISPLAYED VBD VBN
displayed VBN VBD
DISPLAYING VBG
display NN VB VBP
DISPLAY NN VB VBP
displays NNS VBZ
DISPLAYS NNS VBZ
DISPLEASED JJ
displeases VBZ
DISPLEASES VBZ
DISPOSABLE JJ
DISPOSABLES NNS
DISPOSAL NN
DISPOSALS NNS
disposed VBN JJ VBD
DISPOSED VBN VBD JJ
disposes VBZ
DISPOSES VBZ
dispose VB
DISPOSE VB
DISPOSING VBG
DISPOSITION NN NNP
DISPOSITIONS NNS
DISPOSTI NNP
disproportionate JJ
DISPROPORTIONATE JJ
DISPROPORTIONATELY RB
disprove VB
DISPROVE VB
DISPUTADA NNP
DISPUTADO NNP
disputed VBN VBD JJ
DISPUTED VBN VBD JJ
dispute NN VBP VB
DISPUTE NN VB VBP
DISPUTE-SETTLEMENT JJ
disputes NNS VBZ
DISPUTES NNS VBZ
DISQUALIFICATION NN
disqualified VBN
DISQUALIFIED VBN
disqualify VB
DISQUALIFY VB
disquieting JJ
DISQUIETING JJ
disregarded VBD
DISREGARDED VBD
disregard NN VB
DISREGARD VB NN
disrupted VBN VBD
DISRUPTED VBN VBD
DISRUPTING VBG
DISRUPTION NN
DISRUPTIONS NNS
DISRUPTIVE JJ
disrupt VB
DISRUPT VB
DISSATISFACTION NN
dissatisfied JJ VBN
DISSATISFIED JJ VBN
dissected VBN
DISSECTED VBN
DISSECTING VBG
DISSECTION NN
disseminated VBN
DISSEMINATED VBN
disseminate VB
DISSEMINATE VB
DISSEMINATING VBG
DISSEMINATION NN
DISSENSION NN
DISSENTED VBD VBN
dissented VBN VBD
DISSENTER NN
DISSENTERS NNS
dissenting JJ
DISSENTING JJ
DISSENT NN
DISSENTS NNS
DISSERVICE NN
dissident JJ NN
DISSIDENT JJ NN NNP
Dissident JJ NNP
dissident-shareholder NN
DISSIDENT-SHAREHOLDER NN
Dissidents NNS
DISSIDENTS NNS
dissimilar JJ
DISSIMILAR JJ
dissipated VBN
DISSIPATED VBN
dissipates VBZ
DISSIPATES VBZ
dissipate VB
DISSIPATE VB
dissociate VB
DISSOCIATE VB
DISSOCIATING VBG
DISSOLUTION NN
dissolved VBN
DISSOLVED VBN
dissolves VBZ
DISSOLVES VBZ
dissolve VB
DISSOLVE VB
DISSOLVING VBG
DISSONANCE NN
dissuade VB
DISSUADE VB
distance NN VB
DISTANCE NN VB NNP
DISTANCES NNS
distancing VBG NN
DISTANCING VBG NN
distant JJ
Distant JJ
DISTANT JJ
DISTASTEFUL JJ
DISTASTE NN
DISTATE NN
distilled VBN JJ
DISTILLED VBN JJ NNP
Distiller NN
DISTILLER NN
Distillers NNPS NNP
DISTILLERS NNS NNP NNPS
DISTILLERY NN
DISTILLING VBG
DISTINCTION NN
DISTINCTIONS NNS
DISTINCTIVE JJ
DISTINCTIVELY RB
distinctiveness NN
DISTINCTIVENESS NN
distinct JJ
DISTINCT JJ
DISTINCTLY RB
distinguished VBD JJ VBN
DISTINGUISHED VBD JJ VBN
distinguish VB
DISTINGUISH VB
distorted JJ VBN
DISTORTED JJ VBN
DISTORTIONS NNS
distorts VBZ
DISTORTS VBZ
distort VB VBP
DISTORT VB VBP
distracted VBN VBD
DISTRACTED VBN VBD
distracting VBG JJ
DISTRACTING VBG JJ
DISTRACTION NN
DISTRACTIONS NNS
distract VB
DISTRACT VB
DISTRESSED JJ
DISTRESSFUL JJ
distressing JJ
DISTRESSING JJ
DISTRESSINGLY RB
distress NN
DISTRESS NN
DISTRIBUTABLE JJ
Distributed VBN
distributed VBN VBD
DISTRIBUTED VBN VBD
DISTRIBUTER NN
distributes VBZ
DISTRIBUTES VBZ
distribute VB VBP
DISTRIBUTE VB VBP
Distributing VBG
distributing VBG NN
DISTRIBUTING VBG NN
Distribution NN
DISTRIBUTION NN
DISTRIBUTIONS NNS
DISTRIBUTOR NN
DISTRIBUTORSHIP NN
Distributors NNPS
DISTRIBUTORS NNS NNPS
districting NN
DISTRICTING NN
DISTRICT JJ
district NN JJ
DISTRICT NN NNP JJ
District NNP NN
DISTRICTS NNS
DISTRICTS\/STATES NNS
DISTRICT\/STATE NN
DISTRUST NN
DISTURBANCE NN
DISTURBANCES NNS
disturbed VBN JJ
DISTURBED VBN JJ
disturbing JJ VBG
DISTURBING JJ VBG
disturbs VBZ
DISTURBS VBZ
disturb VB
DISTURB VB
DITCH NN NNP
DITHERING VBG
DITTO NN
dived VBD
DIVED VBD
dive NN VBP VB
DIVE NN VB VBP
DIVERGENCE NN
divergent JJ
DIVERGENT JJ
diverge VB
DIVERGE VB
DIVERGING VBG
diverse JJ
DIVERSE JJ
diversifed VBN
DIVERSIFED VBN
Diversification NN
DIVERSIFICATION NN
DIVERSIFICATIONS NNS
diversified JJ VBN
DIVERSIFIED JJ VBN NNP
DIVERSIFYING VBG
diversify VB
Diversify VB
DIVERSIFY VB
DIVERSIONARY JJ
DIVERSION NN
DIVERSIONS NNS
DIVERSITY NN
DIVERS NNS
diverted VBN
DIVERTED VBN
DIVERTING VBG
divert VB VBP
DIVERT VB VBP
divested JJ VBD
DIVESTED VBD JJ
Divesting VBG
DIVESTING VBG
DIVESTITURE NN
DIVESTITURE-RELATED JJ
DIVESTITURES NNS
divest VB VBP
DIVEST VB VBP
dives VBZ
DIVES VBZ
divided VBN VBD JJ
DIVIDED VBN VBD JJ
Dividend NN
DIVIDEND NN
Dividend-related JJ
DIVIDEND-RELATED JJ
DIVIDENDS NNS
divides VBZ
DIVIDES VBZ
Divide VB
divide VBP NN VB
DIVIDE VBP VB NN
dividing VBG VBG|NN|JJ
DIVIDING VBG VBG|NN|JJ
DIVINE NNP
diving JJ NN VBG
DIVING JJ NN VBG
divisional JJ
DIVISIONAL JJ
DIVISION NN NNP
Division NNP NN
DIVISIONS NNS
DIVISIVE JJ
divisiveness NN
DIVISIVENESS NN
divorced VBN VBD
DIVORCED VBN VBD
DIVORCE NN
divulge VB
DIVULGE VB
divvied VBN
DIVVIED VBN
DIVVYING VBG
DIXIECRAT NNP
DIXIE NNP
DIXON NNP
dizziness NN
DIZZINESS NN
dizzying JJ VBG
DIZZYING JJ VBG
DJIA NNP
DJ NNP
DJURDJEVIC NNP
DLC NNP
DLJ NNP
D-MASS. NNP
'd MD VBD NNP
'D MD VBD NNP
DNA NNP NN
D.N. NNP
D. NNP
D NNP SYM LS
DOAK NNP
DOBI NNP
DOBSON NNP
docile JJ
DOCILE JJ
DOCKET NN
DOCKETS NNS
DOCK NN
dock-siders NNS
DOCK-SIDERS NNS
DOC NNP
doctoral JJ
DOCTORAL JJ
DOCTORATE NN
doctoring NN
DOCTORING NN
doctor NN VB
DOCTOR NN VB NNP
Doctors NNS
DOCTORS NNS
DOCTRINE NN NNP
Doctrine NNP NN
DOCTRINES NNS
DOCUDRAMA NN
DOCUDRAMAS NNS
DOCUMENTARIES NNS
documentary NN JJ
DOCUMENTARY NN JJ
DOCUMENTATION NN
documented VBN
DOCUMENTED VBN
DOCUMENTING VBG
document NN VB
DOCUMENT NN VB NNP
Documents NNS
documents NNS VBZ
DOCUMENTS NNS VBZ
doddering JJ
DODDERING JJ
DODD NNP
dodged VBD
DODGED VBD
DODGE NNP VBP
DODGER NNP
Dodgers NNP NNPS
DODGERS NNP NNPS
dodge VBP
DODSON NNP
DOE NNP
DOERFLINGER NNP
does VBZ
Does VBZ NNP
DOES VBZ NNP
DO-EVERYTHING JJ
DOG-EARED JJ
DOGFIGHT NN
DOGGED VBN JJ VBD
dogged VBN VBD JJ
DOGGING VBG
DOGMA NN
dog-meat NN
DOG-MEAT NN
DOG NN NNP
DO-GOODER JJ
do-gooders NNS
DO-GOODERS NNS
DOGS NNS
Dogs NNS NNP
DOGS NNS NNP VBZ
dogs NNS VBZ
DOHERTY NNP
doi FW
Doing VBG
DOING VBG
DOI NNP FW
DO-IT-YOURSELF JJ
DOLAN NNP
dolce FW
DOLCE FW
doldrums NNS NN
DOLDRUMS NNS NN
doled VBD
DOLED VBD
DOLE NNP VBP VB
dole VB VBP
DOLING VBG
dollar-cost NN
DOLLAR-COST NN
DOLLAR-DENOMINATED JJ
dollar\/mark JJ
DOLLAR\/MARK JJ
dollar-mark NN
DOLLAR-MARK NN
Dollar NN NNP
DOLLAR NN NNP
DOLLAR-PRICED JJ
DOLLARS NNPS
DOLLARS NNS NNPS
Dollar-yen JJ
DOLLAR-YEN JJ
dolledup JJ
DOLLEDUP JJ
DOLL NN
DOLL-SIZED JJ
DOLLS NNS
DOLPHIN NNP
Dolphins NNPS
DOLPHINS NNS NNPS
DOLT NN
DOMAINE NNP
DOMAIN NN
DOMAN NNP
DOMENICI NNP
DOME NNP NN
DOMES NNS
Domestically RB
DOMESTICALLY RB
DOMESTIC-DEMAND JJ
domestic JJ NN
DOMESTIC JJ NN NNP
Domestic JJ NNP
DOMESTIC-MADE JJ
domestic-production NN
DOMESTIC-PRODUCTION NN
DOMINANCE NN
dominant JJ
DOMINANT JJ NNP
dominated VBN VBD
DOMINATED VBN VBD
dominates VBZ
DOMINATES VBZ
dominate VB VBP
DOMINATE VB VBP
dominating VBG JJ
DOMINATING VBG JJ
DOMINATION NN
domineering JJ
DOMINEERING JJ
DOMINGO NNP
DOMINGOS NNP
DOMINGUEZ NNP
DOMINICI NNP
DOMINICK NNP
DOMINION NNP NN
dominoes NN
DOMINOES NN
DOMINO NN
DOMINUS NNP
DOM NNP
DOMPIERRE NNP
DONAHUE NNP
DONALD NNP
DONALDSON NNP
DONALDSONVILLE NNP
DONA NNP
donated VBN VBD
DONATED VBN VBD
donate VB VBP
DONATE VB VBP
Donating VBG
DONATING VBG
DONATION NN
Donations NNS
DONATIONS NNS
DONBAS NNP
done VBN RB
DONE VBN RB
DONG-A NNP
DONGEN NNP
DONG NNP
DONNA NNP
donned VBD
DONNED VBD
DONNELLEY NNP
DONNELLY NNP
Donning VBG
DONNING VBG
DON NNP VB
DONNYBROOK NN
DONOGHUE NNP
DONOHOO NNP
DONOHUE NNP
DONOR NN
DONORS NNS
DONOVAN NNP
dons VBZ NNS
DONS VBZ NNS
DON'T-CON-ME JJ
DON'T VB
Donuts NNP NNPS
DONUTS NNP NNPS
don VB
DOOLING NNP
DOOLITTLE NNP
doomed VBN JJ VBD
DOOMED VBN VBD JJ
DOOMING VBG
doom NN VB
DOOMSAYER NN
DOOMSAYERS NNS
DOOMSDAY NN
DOOM VB NN
DOONESBURY NNP
DOORDARSHAN NNP
DO-OR-DIE JJ
doormen NNS
DOORMEN NNS
DOORNE NNP
DOOR NN NNP
DOORS NNS
DOORSTEP NN
DOOR-TO-DOOR JJ
DOORWAY NN
DOOSAN NNP
DOPE NN
DORADO NNP
DORENA NNP
DORFMAN NNP
DORGAN NNP
DORGEN NNP
DORIAN NNP
DORIS NNP
dormant JJ
DORMANT JJ
DORMITORY NN
DORNAN NNP
DOROTHY NNP
DORRANCE NNP
DORSCH NNP
DORSEY NNP
DOSAGE NN
DOSE NN
DOSES NNS
DOSKOCIL NNP
DOSSIERS NNS
DOSTOEVSKI NNP
doted VBN
DOTED VBN
doth VBZ
DOTH VBZ
DOT NNP VBP
DOTSON NNP
DOTTING VBG
dot VBP
DOUBLE-A-1 JJ
DOUBLE-A-2 JJ
DOUBLEA-2 JJ
DOUBLE-A-3 JJ
double-A JJ NNP
DOUBLE-A JJ NNP
DOUBLE-A-MINUS JJ
DOUBLE-A-PLUS JJ
DOUBLE-A-RATED JJ
DOUBLE-B JJ
DOUBLE-BLADED JJ
double-B-minus\/B NN
DOUBLE-B-MINUS\/B NN
DOUBLE-B-PLUS JJ
DOUBLE-BREASTED JJ
double-C NN
DOUBLE-C NN
double-coupon NN
DOUBLE-COUPON NN
double-crossed VBD
DOUBLE-CROSSED VBD
DOUBLEDAY NNP
DOUBLE-DECKER JJ
double-decking NN
DOUBLE-DECKING NN
DOUBLE-DECK JJ
DOUBLE-DIGIT JJ
Doubled VBD
doubled VBD VBN
DOUBLED VBD VBN
DOUBLE-EDGED JJ
double-hamburger NN
DOUBLE-HAMBURGER NN
double JJ VB RB VBP
DOUBLE JJ VB RB VBP
DOUBLE-JOINTED NNP
Double RB
doubles VBZ
DOUBLES VBZ NNP
DOUBLE-WING JJ
doubling VBG NN
DOUBLING VBG NN
DOUBLY RB
doubted VBD
DOUBTED VBD
DOUBTER NN
DOUBTERS NNS
DOUBTFUL JJ
doubtless RB
DOUBTLESS RB
doubt NN VBP VB RB
DOUBT NN VBP VB RB
Doubts NNS
doubts NNS VBZ
DOUBTS NNS VBZ
DOUGHERTY NNP
DOUGHNUT NN
DOUGLAS NNP
DOUG NNP
do VBP VB
Do VBP VB NNP
DO VBP VB NNP
Dove NN
DOVE NN VBD
DOVER NNP
dovetails VBZ
DOVETAILS VBZ
dove VBD
dowdy JJ
DOWDY JJ
DOWIE NNP
downbeat JJ NN
DOWNBEAT JJ NN
DOWNDRAFT NN
downed VBD
DOWNED VBD
DOWNEY NNP
DOWNFALL NN
downgraded VBD VBN
DOWNGRADED VBD VBN
Downgraded VBN
DOWNGRADE NN
DOWNGRADES NNS
downgrading NN VBG
DOWNGRADING NN VBG
downhill RB
DOWNHILL RB
DOWNING NNP
Down IN NNP
DOW NNP
down-payment NN
DOWN-PAYMENT NN
DOWNPAYMENTS NNS
downplayed VBD
DOWNPLAYED VBD
DOWN RB IN RP JJ NNP NN VBP IN|RB RBR
down RB IN RP JJ NN RBR VBP IN|RB
downright RB JJ
DOWNRIGHT RB JJ
DOWNSHOOT NN
downside NN JJ
DOWNSIDE NN JJ
downsized VBN
DOWNSIZED VBN
downsize VB
DOWNSIZE VB
DOWNSIZING NN
downsizing NN VBG
DOWNSIZING NN VBG
DOWNS NNS
downstairs NN
DOWNSTAIRS NN
downstream JJ
DOWNSTREAM JJ
DOWNTIME NN
DOWN-TO-EARTH JJ
Downtown NN
downtown NN JJ
DOWNTOWN NN JJ
DOWNTREND NN
downtrodden JJ
DOWNTRODDEN JJ
DOWNTURN NN
DOWNTURNS NNS
downward JJ RB
DOWNWARD JJ RB
DOWTY NNP
DOXEPIN NN
DOYLE NNP
DOZEN NN NNP
Dozens NNS
DOZENS NNS
DPC NNP
DPT NNP
DRABINSKY NNP
drab JJ
DRAB JJ
drachmas NN
DRACHMAS NN
draconian JJ
DRACONIAN JJ
DRACULA NNP
drafted VBN VBD
DRAFTED VBN VBD
DRAFTING VBG
draft NN VB
DRAFT NN VB
draftsmen NNS
DRAFTSMEN NNS
DRAG-DOWN JJ
dragged VBN VBD
DRAGGED VBN VBD
DRAGGER NN
Dragging VBG
DRAGGING VBG
DRAGON NNP
DRAGO NNP
drags VBZ
DRAGS VBZ
drag VB NN VBP
DRAG VB NN VBP
drained VBN
DRAINED VBN
draining VBG NN
DRAINING VBG NN
Drain NN
drain NN VB
DRAIN NN VB
drains VBZ
DRAINS VBZ
DRAKE NNP
DRAMA NN
dramas NN
DRAMAS NN
DRAMATICALLY RB
DRAMATIC JJ
DRAMATIZATION NN
DRAMATIZATIONS NNS
DRAMs NNS NNPS
DRAMS NNS NNPS
DRAPES NNS
drape VB NN
DRAPE VB NN
DRASTICALLY RB
drastic JJ RB
DRASTIC JJ RB
DRAVO NNP
DRAWBACK NN
DRAWBACKS NNS
DRAWINGS NNS
Drawing VBG
drawing VBG NN
DRAWING VBG NN
DRAWL NN
DRAWN-OUT JJ
drawn VBN
DRAWN VBN
draws VBZ NNS
DRAWS VBZ NNS
draw VB VBP NN
DRAW VB VBP NN
dreaded VBN JJ
DREADED VBN JJ
DREADFUL JJ
DREAD NN
dreamed VBD VBN
DREAMED VBD VBN
DREAMING VBG
dream NN VBP VB
DREAM NN VBP VB
Dreams NNS
dreams NNS VBZ
DREAMS NNS VBZ
dreamt VBD
DREAMT VBD
Dream VB NN
dreamy JJ
DREAMY JJ
drearier RBR
DREARIER RBR
DREARY JJ
DREMAN NNP
drenching NN
DRENCHING NN
Dresden NN NNP
DRESDEN NNP NN
DRESDNER-ABD NNP
DRESDNER NNP
dressed VBN VBD
DRESSED VBN VBD
DRESSER NNP
dresses NNS VBZ
DRESSES NNS VBZ
DRESSING VBG
dressmaking NN
DRESSMAKING NN
dress NN VB VBP
DRESS NN VB VBP NNP
drew VBD
DREW VBD NNP
Drexel NNP NN
DREXEL NNP NN
Drexel-underwritten JJ
DREXEL-UNDERWRITTEN JJ
DREXLER NNP
DREYER NNP
DREYER'S NNP
DREYFUS NNP
DRG NNP
dribble NN
DRIBBLE NN
DRIED-OUT JJ
dried VBD VBN
DRIED VBD VBN
DRIESELL NNP
drifted VBD
DRIFTED VBD
DRIFTING VBG
drift-net NN
DRIFT-NET NN
DRIFTNET NN
drift VB NN VBP
DRIFT VB NN VBP
DRIFTWOOD NN
drill-bit NN
DRILL-BIT NN
drilled VBN VBD
DRILLED VBN VBD
DRILLERS NNS
DRILLING NN NNP VBG
Drilling NNP NN
drilling NN VBG
DRILLS NNS
drill VB NN
DRILL VB NN
DRI\/MCGRAW NNP
Drinker NN
DRINKER NN
drinking NN VBG
DRINKING NN VBG
Drink NN
drink NN VBP VB
DRINK NN VB VBP
DRINKS NNS
DRIPPING VBG
DRISCOLL NNP
DRISKILL NNP
drive NN VB VBP
DRIVE NN VB VBP NNP
driven VBN JJ
DRIVEN VBN JJ
Driver NN
DRIVER NN
DRIVERS NNS
drives NNS VBZ
DRIVES NNS VBZ
drive-train NN
DRIVE-TRAIN NN
driving VBG NN JJ
DRIVING VBG NN JJ NNP
Driving VBG NNP
DRIVON NNP
DR. NNP
DROBNICK NNP
DROGOUL NNP
drooled VBD
DROOLED VBD
DROOLING VBG
DROOPY-EYED JJ
droped VBD
DROPED VBD
DROP-IN JJ
DROPLETS NNS
Drop NN NNP
drop NN VB VBP
DROP NN VB VBP NNP
drop-off NN JJ
DROP-OFF NN JJ
DROP-OUT JJ
DROPOUT NN
DROPOUTS NNS
DROPPABLE JJ
dropped VBD VBN
DROPPED VBD VBN
DROPPER NN
DROPPERS NNS
DROPPING VBG
drops NNS VBZ
DROPS NNS VBZ
DROUGHT-INDUCED JJ
DROUGHT NN
DROUGHT-RAVAGED JJ
DROUGHT-RELATED JJ
DROUGHTS NNS
DROUGHT-STUNTED JJ
DROVES NNS
drove VBD
DROVE VBD
DROWNED VBD JJ VBN
drowned VBN JJ VBD
drown VB
DROWN VB
DROZ NNP
drubbing NN
Drubbing NN
DRUBBING NN
DRUG-APPROVAL JJ
DRUG-CONSUMING JJ
drug-dealing NN
DRUG-DEALING NN
DRUG-FINANCED JJ
drug-industry NN
DRUG-INDUSTRY NN
drug-interdiction NN JJ
DRUG-INTERDICTION NN JJ
DRUG NN NNP
Drug NNP NN
drug-policy NN
DRUG-POLICY NN
DRUG-RELATED JJ
drug-sales NNS
DRUG-SALES NNS
DRUG-SEEKING JJ
DRUGS NNS NNP NNPS
Drugs NNS NNPS NNP
drug-store NN
DRUG-STORE NN
DRUGSTORE NN
DRUGSTORES NNS
DRUG-TRAFFICKING JJ
drumbeating NN
DRUMBEATING NN
DRUMBEAT NN
DRUMMER NN
DRUMMING VBG
DRUMROLL NN
DRUMS NNS
drum VB
DRUM VB
DRUNK-DRIVING JJ
drunken JJ
DRUNKEN JJ
drunkenness NN
DRUNKENNESS NN
drunk JJ NN
DRUNK JJ NN NNP
DRU NNP
DRURY NNP
DRYBRED NNP
DRYDEN NNP
DRYING VBG
DRYJA NNP
dry JJ VB
DRY JJ VB NNP
dryness NN
DRYNESS NN
DRYWALL NN
DSM NNP
D.S NNP
D.S. NNP
Ds NNS
DS NNS
DSP NNP
d SYM LS
DTH NNP
D.T NNP
D.T. NNP
DUAL-CAREER JJ
dual JJ
Dual JJ
DUAL JJ
dual-trading NN
DUAL-TRADING NN
DUANE NNP
DUARTE NNP
Dubbed VBN
dubbed VBN VBD
DUBBED VBN VBD
DUBININ NNP
DUBINSKY NNP
DUBIOUS JJ
DUBIOUSLY RB
DUBLIN NNP
DUBNOW NNP
DUBOIS NNP
DUBOSE NNP
dubs VBZ
DUBS VBZ
DUCHARME NNP
DUCHOSSOIS NNP
DUCKING VBG
duckling NN
DUCKLING NN
DUCKLINGS NNS
Duck NN NNP
duck NN VB
DUCK NN VB NNP
Ducks NNS
ducks NNS VBZ
DUCKS NNS VBZ
DUCKY NNP
DUCLOS NNP
DUCTS NNS
DUDGEON NN
DUDLEY NNP
DUDS NNS
Due JJ NNP
DUE JJ RB NN NNP NNS
due JJ RB NN NNS
dueling NN VBG
DUELING NN VBG
DUEL NN
DUELS NNS
due-process NN
DUE-PROCESS NN
DUES NNS
DUESSELDORF NNP
DUET NN
DUFFERS NNS
DUFFIELD NNP
DUFF NNP
DUFFUS NNP
DUGDALE NNP
dug VBD
DUG VBD
DUKAKIS NNP
DUKE NNP NN
d'Ulisse FW
D'ULISSE FW
dulled VBN
DULLED VBN
duller RBR
DULLER RBR
dullest JJS
DULLEST JJS
dullish JJ
DULLISH JJ
dull JJ
DULL JJ
dullness NN
DULLNESS NN
DULUTH NNP
DULY RB
dumber JJR
DUMBER JJR
dumbest JJS
DUMBEST JJS
DUMBFOUNDED JJ
dumb JJ
DUMB JJ
DUMBO NNP
DUMEZ NNP
DUMMIES NNS
dummy JJ NN
DUMMY NN JJ
dumped VBD VBN
DUMPED VBD VBN
DUMPING VBG
dumps NNS VBZ
DUMPSTER NNP
DUMPS VBZ NNS
DUMPTY NNP
dump VB VBP NN
DUMP VB VBP NN
DUNCAN NNP
DUNDEE NNP
DUNDE NNP
dune-grass NN
DUNE-GRASS NN
DUNE NN
Dunes NNPS
DUNES NNS NNPS
DUNG NN
DUNKER NNP
DUNKIN NNP
DUNKIN' NNP
DUNLAEVY NNP
DUNN NNP
DUN NNP
du NNP FW
DU NNP FW
DUNTON NNP
duodenal JJ
DUODENAL JJ
DUO NN
dupes VBZ
DUPES VBZ
DUPLEX NN
duplicated VBN
DUPLICATED VBN
duplicate VB JJ
DUPLICATE VB JJ
Duplicating VBG
DUPLICATING VBG
DUPLICATIONS NNS
DUPLICITY NN
DUPONT NNP
DUPUY NNP
DUQUESNE NNP
DURABILITY NN
durable-goods NNS
DURABLE-GOODS NNS
Durable JJ
DURABLE JJ
Durables NNPS
DURABLES NNS NNPS
DURACELL NNP
DURATION NN
DURCAN NNP
during IN
During IN
DURING IN
DURIRON NNP
DURKIN NNP
DURNEY NNP
DUSK NN
DUSTBIN NN
dusted VBD
DUSTED VBD
DUSTING VBG
DUST NN
DUSTON NNP
dust-up NN
DUST-UP NN
dusty JJ
DUSTY JJ NNP
Dutch-based JJ
DUTCH-BASED JJ
Dutch-descended JJ
DUTCH-DESCENDED JJ
Dutch-elm-disease NN
DUTCH-ELM-DISEASE NN
Dutch JJ NNP NNPS
DUTCH JJ NNP NNPS
DUTCH\/SHELL NNP
DUTIES NNS
DUTIFUL JJ
DUTIFULLY RB
Duty-free JJ
DUTY-FREE JJ
DUTY NN NNP
DUVALIER NNP
DUY NNP
dwarfed VBN
DWARFED VBN
dwarf NN VB VBP
dwarfs VBZ
DWARFS VBZ
DWARF VB NN VBP
DWELLER NN
DWELLERS NNS
dwelling NN
DWELLING NN
DWELLINGS NNS
DWG NNP
DWIGHT NNP
dwindled VBD
DWINDLED VBD
DWINDLING VBG
DWORKIN NNP
DYCOM NNP
DYDEE NNP
DYED-IN-THE-WOOL JJ
dyed VBN
DYED VBN
DYER NNP
DYES NNS
DYING VBG
DYKE NNP
DYK NNP
Dylan-influenced JJ
DYLAN-INFLUENCED JJ
DYLAN NN NNP
Dylan NNP NN
DYLEX NNP
DYNABOOK NNP
DYNAMICALLY RB
dynamic JJ NN
DYNAMIC JJ NN NNP
Dynamics NNP NNPS
DYNAMICS NNP NNPS NNS
DYNAMISM NN
DYNAMITE NN
DYNAMO NN
DYNAMOS NNS
DYNAPERT NNP
DYNASCAN NNP
DYNASTY NN NNP
DYSON NNP
DYSTOPIA NN
E-2C NNP
E-71 NNP
each DT
Each DT
EACH DT
eager JJ
Eager JJ
EAGER JJ
EAGERLY RB
eagerness NN
EAGERNESS NN
EAGLE-BEROL NNP
EAGLE NNP
Eagles NNPS
EAGLES NNPS
EAGLETON-NEWARK NNP
EAGLETON NNP
EAKLE NNP
EARLE NNP
EARLHAM NNP
EARLIER-ANNOUNCED JJ
EARLIER-EXPRESSED JJ
earlier-period NN
EARLIER-PERIOD NN
Earlier RBR RB JJR
EARLIER RBR RB JJR JJ NN
earlier RBR RB JJR NN JJ
earliest JJS RBS
EARLIEST JJS RBS
EARL NNP
early JJ RB
EARLY JJ RB NNP
early-morning JJ NN
EARLY-MORNING JJ NN
Early RB NNP JJ
EARLY-RETIREMENT JJ
earmarked VBN VBD
EARMARKED VBN VBD
EARMARKING VBG
earmark VB
EARMARK VB
earned VBD VBN
EARNED VBD VBN
EARNERS NNS
earnest NN JJ
EARNEST NN JJ
EARNIGS NNS
Earning NN
EARNINGS-GROWTH JJ
EARNINGS-LIMIT JJ
Earnings NNS
EARNINGS NNS
earnings NNS NN
EARNINGS NNS NN
EARNINGS-PER-SHARE JJ
EARNINGS-RELATED JJ
earning VBG NN
EARNING VBG NN
Ear NN
EAR NN
earns VBZ
Earns VBZ
EARNS VBZ
earn VB VBP
EARN VB VBP
earring NN
EARRING NN
EARRINGS NNS
EARS NNS
earthbound JJ
EARTHBOUND JJ
EARTHLINGS NNS
earthly JJ
EARTHLY JJ
earthmoving JJ
EARTH-MOVING JJ
EARTHMOVING JJ
Earth NNP NN
EARTH NNP NN
Earth-quake NN
EARTH-QUAKE NN
EARTHQUAKE NN
Earthquake NN NNP
EARTHQUAKE NN NNP
EARTHQUAKE-PROOF JJ
EARTHQUAKE-RAVAGED JJ
Earthquake-related JJ
EARTHQUAKE-RELATED JJ
EARTHQUAKE-RESISTANT JJ
EARTHQUAKES NNS
EARTHQUAKE-STRICKEN JJ
EARTHQUAKE-TRAINED JJ
EARTHQUAKE-TRIGGERED JJ
earthshaking JJ
EARTHSHAKING JJ
EARTHWORMS NNS
earthy JJ
EARTHY JJ
eased VBD VBN
EASED VBD VBN
eases VBZ
EASES VBZ
ease VB NN VBP
EASE VB NN VBP
easier JJR RBR RB
EASIER JJR RBR RB
easiest JJS
EASIEST JJS
EASILY RB
easing VBG NN
EASING VBG NN
EASTATE NNP
Easterners NNS
EASTERNERS NNS
eastern JJ
Eastern NNP JJ
EASTERN NNP JJ
EASTER NNP
east JJ RB
EASTMAN NNP
East NNP JJ NNS RB NNPS
EAST NNP JJ NNS RB NNPS
EAST NNS NNP
eastward RB
EASTWARD RB
East-West NNP JJ
EAST-WEST NNP JJ
easygoing JJ
EASYGOING JJ
easy JJ RB
EASY JJ RB NNP
Easy NNP JJ
EASY-TO-FILM JJ
EASY-TO-READ JJ
EASY-TO-USE JJ
eaten VBN
EATEN VBN
EATERS NNS
eating VBG NN JJ
EATING VBG NN JJ NNP
EATON NNP
eats VBZ
EATS VBZ
eat VB VBP
EAT VB VBP
EAUX NNP
eavesdropping NN
Eavesdropping NN
EAVESDROPPING NN
eavesdrop VB
EAVESDROP VB
EBASCO NNP
ebb NN VB
ebbs VBZ
EBBS VBZ
EBB VB NN
Ebensburg NNP NN
EBENSBURG NNP NN
EBPI NNP
ebullient JJ
EBULLIENT JJ
ECCENTRIC JJ
ECCENTRICS NNS
ECCO NNP
ECHEANDIA NNP
ECHELON NN NNP
ECHELONS NNS
echoed VBN VBD
ECHOED VBN VBD
ECHOES NNS
Echoing VBG
ECHOING VBG
ECHO VBP NNP VB NN
echo VBP NN VB
ECI NNP
ECKENFELDER NNP
ECKHARD NNP
ECLAIRS NNS
eclectic JJ NN
ECLECTIC JJ NN
eclipse VB
ECLIPSE VB NNP
ECLIPSING VBG
E.C. NNP
EC NNP
ECOLE NNP
ECOLOGICAL JJ NNP
ECOLOGICALLY RB
ECONOBOX NN
ECONOMETRIC JJ NNP
ECONOMICAL JJ
ECONOMICALLY RB
ECONOMIC-CRIME JJ
economic-development NN
ECONOMIC-DEVELOPMENT NN
economic-efficiency NN
ECONOMIC-EFFICIENCY NN
ECONOMIC-FORECASTING JJ
ECONOMIC JJ
ECONOMIC JJ NNP
Economic NNP JJ
ECONOMIC-RESTRUCTURING JJ
economics NNS NN
ECONOMICS NNS NNP NN
ECONOMIES NNS
ECONOMIST NN NNP
Economist NNP NN
Economists NNS NNP NNPS
ECONOMISTS NNS NNP NNPS
economize VB
ECONOMIZE VB
ECONOMY NN
ECONOMY NN NNP
Economy NNP NN
ECSTATIC JJ
ECTOPLASMIC JJ
EDA NNP
EDDIE NNP
EDDINGTON NNP
EDDY NNP
EDELMANN NNP
EDELMAN NNP
EDELSON NNP
EDELSTEIN NNP
EDEN NNP
EDGAR NNP
edged VBD VBN
EDGED VBD VBN
Edge NNP NN
edge NN VB
EDGE NN VB NNP
EDGES NNS
edginess NN
EDGINESS NN
EDGING VBG
edgy JJ
EDGY JJ
EDIBLE JJ
EDINBURGH NNP
Edison NNP NN
EDISON NNP NN
EDISTO NNP
EDITA NNP
EDITH NNP
EDITING\/ELECTRONIC JJ
editing NN
EDITING NN
EDITION NN
EDITIONS NNS
EDITORIALLY RB
editorial NN JJ
EDITORIAL NN JJ
editorial-page NN JJ
EDITORIAL-PAGE NN JJ
Editorials NNS
EDITORIALS NNS
editor-in-chief NN
EDITOR-IN-CHIEF NN
EDITOR NN NNP
Editor NNP NN
EDITORS NNS
edit VB
EDIT VB
EDMAR NNP
EDMOND NNP
EDMONTON NNP
EDMUND NNP
EDNEE NNP
EDNIE NNP
ED NNP
EDOUARD NNP
EDSEL NNP
EDS NNP
EDT NNP
EDUARD NNP
educated VBN
EDUCATED VBN
educate VB
EDUCATE VB
EDUCATING VBG
educational JJ
EDUCATIONAL JJ NNP
EDUCATION NN
EDUCATION NN NNP
Education NNP NN
EDUCATIONS NNS
EDUCATOR NNP
Educators NNP NNS
EDUCATORS NNS NNP
EDUCTION NN
EDWARD NNP
EDWARDS NNP
EDWIN NNP
EDZARD NNP
EEL NN
E.E. NNP
EEOC NNP
eerie JJ
EERIE JJ
EERILY RB
eeriness NN
EERINESS NN
effective JJ NN
EFFECTIVE JJ NN
EFFECTIVELY RB
effectiveness NN
EFFECTIVENESS NN
Effect NN
effect NN VB
EFFECT NN VB
Effects NNPS
effects NNS VBZ
EFFECTS NNS VBZ NNPS
effete JJ
EFFETE JJ
EFFICIENCIES NNS
EFFICIENCY NN
efficient JJ
EFFICIENT JJ
EFFICIENTLY RB
efficient-market NN
EFFICIENT-MARKET NN
effluent JJ
EFFLUENT JJ
EFFORTLESSLY RB
EFFORT NN
Efforts NNS
EFFORTS NNS
EFFRONTERY NN
EFFUSIVE JJ
E.F. NNP
Egad UH
EGAD UH
EGALITARIANISM NN
EGAN NNP
EGA NNP
EGA-VGA JJ
egg-breaking NN
EGG-BREAKING NN
EGGERS NNP
Egg-industry NN
EGG-INDUSTRY NN
EGG NN NNP
EG&G NNP
Egg NNP NN
EGG-ON-THE-FACE JJ
EGG-PROCESSING JJ
EGGS NNS NNP
EGNUSS NNP
EGO NN
EGON NNP
EGOS NNS
EGOTIST NN
EGREGIOUS JJ
EGREGIOUSLY RB
Egyptian JJ NNP
EGYPTIAN JJ NNP
EGYPT NNP
EHMAN NNP
EHRLICHMAN NNP
EHRLICH NNP
EICHLER NNP
EICHNER NNP
EICHOF NNP
EIDSMO NNP
EIFFEL NNP
EIGHT-ACRE JJ
eight CD
Eight CD
EIGHT CD
EIGHT-COUNT JJ
Eighteen CD
EIGHTEEN CD
Eight-foot-tall JJ
EIGHT-FOOT-TALL JJ
EIGHTH-FLOOR JJ
eighth JJ NN
EIGHTH JJ NN
EIGHT-HOUR JJ
EIGHT-MONTH JJ
EIGHT-PERSON JJ
EIGHT-PIECE JJ
EIGHT-TEAM JJ
EIGHT-TIME JJ
EIGHT-YEAR JJ
eight-year-old JJ NN
EIGHT-YEAR-OLD JJ NN
Eighty-five CD
EIGHTY-FIVE CD
Eighty-three CD
EIGHTY-THREE CD
EIJI NNP
EINAR NNP
EINHORN NNP
EINSTEIN NNP
EISAI NNP
EISENBERG NNP
EISENHOWER NNP
EISHI NNP
EISZNER NNP
Either CC DT NNP
either CC DT RB
EITHER CC DT RB NNP
EIZENSTAT NNP
ejected VBN
EJECTED VBN
EKCO NNP
eked VBD
EKED VBD
eke VB
EKE VB
EKONOMICHESKAYA NNP
EL-ABED NNP
elaborate VB JJ
ELABORATE VB JJ
Elaborating VBG
ELABORATING VBG
ELAINE NNP
ELANCO NNP
ELAN NN
elapsed VBN
ELAPSED VBN
ELATION NN
ELBOW NN
ELBOWS NNS
ELCO NNP
ELCOTEL NNP
elder JJR
ELDER JJR
elderly JJ
Elderly JJ
ELDERLY JJ
Elders NNP NNPS
ELDERS NNP NNPS NNS
eldest JJS
ELDEST JJS
ELDRED NNP
ELEANOR NNP
ELECKTRA NNP
Elected VBN
elected VBN VBD JJ
ELECTED VBN VBD JJ
ELECTION NN NNP
Election NNP NN
Elections NNS
ELECTIONS NNS
ELECTIVE JJ
electoral JJ
ELECTORAL JJ NNP
ELECTORATE NN
Electrical JJ NNP
ELECTRICAL JJ NNP
ELECTRICALLY RB
electrical-products NNS
ELECTRICAL-PRODUCTS NNS
ELECTRICAL-SAFETY JJ
ELECTRICIAN NN
ELECTRICITY NN NNP
electric JJ NN
ELECTRIC NNP JJ NN
ELECTRIC-UTILITY JJ NN
electric-utility NN JJ
electrified VBN
ELECTRIFIED VBN
ELECTROCARDIOGRAM NN
ELECTROCHEMICAL NNP
ELECTROCHEMICALS NNS
ELECTRODES NNS
electrogalvanized JJ VBN
ELECTROGALVANIZED JJ VBN
ELECTROGALVANIZING VBG
ELECTROLUMINESCENCE NN
ELECTROLUX NNP
electrolysis NN
ELECTROLYSIS NN
ELECTROLYSIS-OF-WATER JJ
ELECTROLYTIC JJ
ELECTROMAGNETS NNS
ELECTRONICALLY RB
electronic-data NN|NNS
ELECTRONIC-DATA NN|NNS
ELECTRONIC JJ NNP
ELECTRONIC-MEASURING JJ
Electronic NNP JJ
ELECTRONIC-PUBLISHING JJ
ELECTRONICS-INSTRUMENTS JJ
Electronics NNP NNPS
electronics NNS NN
ELECTRONICS NNS NNP NN NNPS
electronics-product NN
ELECTRONICS-PRODUCT NN
electronic-systems NNS
ELECTRONIC-SYSTEMS NNS
electronic-warfare NN
ELECTRONIC-WARFARE NN
ELECTRON NNP
ELECTRO-OPTICAL JJ NNP
ELECTRO-OPTICS NNP NNS
electro-optics NNS
ELECTROREALITY NN
ELECTROSURGERY NNP
elect VB VBP
ELECT VB VBP
elegant JJ
ELEGANT JJ
ELEGANTLY RB
ELEMENTARY JJ NNP
ELEMENT NN
Elements NNS
ELEMENTS NNS
ELENA NNP
ELEPHANT NN
ELEPHANTS NNS
elevated VBD JJ
ELEVATED VBD JJ
elevates VBZ
ELEVATES VBZ
ELEVATIONS NNS
ELEVATOR NN
ELEVATORS NNS
eleven CD
Eleven CD
ELEVEN CD
ELFNER NNP
ELF NNP
ELGIN NNP
ELIANTI NNP
ELIAS NNP
ELIE NNP
eligible JJ NN
ELIGIBLE JJ NN
eliminated VBN VBD
ELIMINATED VBN VBD
eliminates VBZ
ELIMINATES VBZ
Eliminate VB
eliminate VB VBP
ELIMINATE VB VBP
Eliminating VBG
ELIMINATING VBG
ELIMINATION NN
ELI NNP
ELIOT NNP
ELISABETH NNP
ELISA NNP
ELITE NN JJ NNP NNS
elite NN JJ NNS
ELITES NNS
ELITISTS NNS
ELIXIR NN
ELIZABETH NNP
ELJER NNP
ELKHORN NNP
ELKIN NNP
ELKINS NNP
ELLA NNP
ELLEN NNP
ELLE NNP
ELLESMERE NNP
ELLIOT NNP
ELLIOTT NNP
ELLIPTICAL JJ
ELLIS NNP
ELLMANN NNP
ELLMAN NNP
ELMHURST NNP
ELM NNP
EL NNP
elongate VB
ELONGATE VB
ELOQUENCE NN
eloquent JJ
ELOQUENT JJ
ELOQUENTLY RB
ELP NNP
ELRICK NNP
EL-SADR NNP
Else RB
else RB JJ NN
ELSE RB JJ NN
ELSEVIER NNP
elsewhere RB NN
ELSEWHERE RB NN NNP
Elsewhere RB NNP
ELSWEHERE NN
ELTON NNP
ELUCIDATIVE JJ
eluded VBD
ELUDED VBD
ELUDING VBG
ELUSIVE JJ
ELVADOR NNP
ELVEKROG NNP
ELVIRA NNP
ELY NNP
E-mail NN
E-MAIL NN
EMANCIPATION NNP
EMANUEL NNP
emasculate VB
EMASCULATE VB
EMASCULATION NN
EMBARCADERO NNP
EMBARGOED JJ VBD
embargoed VBD JJ
EMBARGOES NNS
EMBARGO NN
EMBARGOS NNS
embarked VBD VBN
EMBARKED VBD VBN
EMBARKING VBG
embark VB
EMBARK VB
embarrassed JJ VBN VBD
EMBARRASSED JJ VBN VBD
embarrassing JJ VBG
EMBARRASSING JJ VBG
EMBARRASSINGLY RB
EMBARRASSMENT NN
embarrass VB
EMBARRASS VB
EMBASSIES NNS
EMBASSY NNP NN
embattled JJ VBN
EMBATTLED JJ VBN
embedded VBN
Embedded VBN
EMBEDDED VBN
embellish VB
EMBELLISH VB
embezzled VBD
EMBEZZLED VBD
EMBEZZLEMENT NN
EMBEZZLER NN
EMBEZZLING VBG
Embittered JJ
EMBITTERED JJ
EMBLEMATIC JJ
EMBLEMS NNS
embodied VBN
EMBODIED VBN
embodies VBZ
EMBODIES VBZ
embody VBP
EMBODY VBP
emboldened VBN
Emboldened VBN
EMBOLDENED VBN
embraced VBN VBD
EMBRACED VBN VBD
embraces VBZ
EMBRACES VBZ
embrace VB
EMBRACE VB
EMBRACING VBG
EMBROIDERY NN
embroiled VBN
EMBROILED VBN
EMBRYONIC JJ
Embryo NN
EMBRYO NN
EMCEE NN
EMC NNP
emerged VBD VBN
EMERGED VBD VBN
EMERGENCE NN
EMERGENCIES NNS
EMERGENCY-MEDICAL JJ
EMERGENCY NN NNP
Emergency NNP NN
emergency-relief NN
EMERGENCY-RELIEF NN
emerges VBZ
EMERGES VBZ
emerge VB VBP
EMERGE VB VBP
Emerging VBG JJ NNP
EMERGING VBG NNP JJ
emeritus NN JJ
EMERITUS NN JJ
EMERSON NNP
EMERY NNP
EMERYVILLE NNP
EMHART NNP
emigrated VBD
EMIGRATED VBD
emigrate VB
EMIGRATE VB
Emigration NN
EMIGRATION NN
EMIGRES NNS
EMILE NNP
EMIL NNP
EMINASE NNP
eminent JJ
EMINENT JJ
Emirates NNPS NNP
EMIRATES NNPS NNP
EMISSARIES NNS
EMISSION NN
EMISSIONS NNS
emitted VBN
EMITTED VBN
EMMA NNP
EMMERICH NNP
EMMONS NNP
'Em NNP
E.M. NNP
emoted VBD
EMOTED VBD
emote VB
EMOTE VB
EMOTIONALISM NN
emotional JJ
EMOTIONAL JJ
EMOTIONALLY RB
EMOTION NN
EMOTIONS NNS
empathize VB
EMPATHIZE VB
EMPATHY NN
EMPEROR NN NNP
emphasis NN
EMPHASIS NN
emphasized VBD VBN
EMPHASIZED VBD VBN
emphasizes VBZ
EMPHASIZES VBZ
emphasize VB VBP
EMPHASIZE VB VBP
EMPHASIZING VBG
EMPHATICALLY RB
emphaticize VB
EMPHATICIZE VB
EMPIRE-BEROL NNP
EMPIRE NN NNP
Empire NNP NN
EMPIRES NNS
EMPIRICAL JJ
employed VBN
EMPLOYED VBN
Employee-benefit JJ
employee-benefit JJ NN
EMPLOYEE-BENEFIT JJ NN
employee-health NN
EMPLOYEE-HEALTH NN
EMPLOYEE-MANAGEMENT JJ
EMPLOYEE NN
EMPLOYEE NN NNP
Employee NNP NN
EMPLOYEE-OWNED JJ
EMPLOYEES NNS
Employees NNS NNP NNPS
EMPLOYEES NNS NNP NNPS VBZ
employees NNS VBZ
EMPLOYER NN
employerpaid JJ
EMPLOYER-PAID JJ
EMPLOYERPAID JJ
Employers NNS NNP NNPS
EMPLOYERS NNS NNP NNPS
EMPLOYER-SPONSORED JJ
EMPLOYING VBG
EMPLOYMENT NN NNP
Employment NNP NN
EMPLOYMENT-SERVICES JJ
EMPLOYMENT-TAX JJ
employs VBZ
EMPLOYS VBZ
employ VB VBP
EMPLOY VB VBP
EMPORIUM NNP
empowered VBN
EMPOWERED VBN
EMPOWERING VBG
empowers VBZ
EMPOWERS VBZ
empower VBP
EMPOWER VBP
'em PRP
'EM PRP NNP
emptied VBN
EMPTIED VBN
EMPTYING VBG
Empty JJ
EMPTY JJ VBP VB
empty JJ VB VBP
EMSHWILLER NNP
EMS NNP
emulated VBN
EMULATED VBN
emulate VB
EMULATE VB
EMULATING VBG
EMYANITOFF NNP
enabled VBD VBN
ENABLED VBD VBN
enables VBZ
ENABLES VBZ
enable VB VBP
ENABLE VB VBP
ENABLING VBG
enacted VBN VBD
ENACTED VBN VBD
ENACTING VBG
ENACTMENT NN
enact VB
ENACT VB
encapsulate VB
ENCAPSULATE VB
ENCASING VBG
enchanting JJ
ENCHANTING JJ
ENCIRCLING VBG
enclosed VBN
ENCLOSED VBN
ENCLOSING VBG
encompassed VBD
ENCOMPASSED VBD
encompasses VBZ
ENCOMPASSES VBZ
encompass VB
ENCOMPASS VB
ENCORE NN
encountered VBD VBN
ENCOUNTERED VBD VBN
encounters VBZ NNS
ENCOUNTERS VBZ NNS
encounter VB NN
ENCOUNTER VB NN
Encouraged VBN JJ
encouraged VBN VBD JJ
ENCOURAGED VBN VBD JJ
Encouragement NN
ENCOURAGEMENT NN
encourages VBZ
ENCOURAGES VBZ
Encourage VB
encourage VB VBP
ENCOURAGE VB VBP
ENCOURAGINGLY RB
Encouraging VBG
encouraging VBG JJ
ENCOURAGING VBG JJ
ENCROACHING VBG
encrusted VBN
ENCRUSTED VBN
ENCRYPTING VBG
encumbered VBN
ENCUMBERED VBN
ENCYCLOPEDIC JJ
endangered-species NNS
ENDANGERED-SPECIES NNS
endangered VBN JJ
ENDANGERED VBN NNP JJ
ENDANGERMENT NN
endanger VB
ENDANGER VB
endearing JJ
ENDEARING JJ
ENDEAVORING VBG
endeavor NN VB
ENDEAVOR NN VB
ENDEAVORS NNS
ENDED VBD
ended VBD VBN
ENDED VBD VBN
ENDINGS NNS
Ending VBG
ending VBG NN
ENDING VBG NN
Endless JJ
ENDLESS JJ
ENDLESSLY RB
End NN NNP VB
end NN VB VBP JJ
END NN VB VBP NNP JJ
END-OF-SEASON JJ
END-OF-YEAR JJ
ENDO NNP
endorsed VBD VBN
ENDORSED VBD VBN
ENDORSEMENT NN
ENDORSEMENTS NNS
ENDORSERS NNS
endorses VBZ
ENDORSES VBZ
endorse VB VBP
ENDORSE VB VBP
ENDORSING VBG
ENDOWED VBD VBN
endowed VBN VBD
ENDOWMENT NN NNP
endow VB
ENDOW VB
endrocrine JJ
ENDROCRINE JJ
Ends NNS NNPS VBZ
ends VBZ NNS
ENDS VBZ NNS NNPS
end-tailed VBN
END-TAILED VBN
endured VBD VBN
ENDURED VBD VBN
Endure VBP
endure VB VBP
ENDURE VB VBP
enduring VBG JJ
ENDURING VBG JJ
end-zone NN
END-ZONE NN
ENEMIES NNS
ENEMY NN
Energetic JJ
ENERGETIC JJ
ENERGIE NNP
ENERGIEPRODUKTIEBEDRIJF NNP
ENERGIES NNS
energized VBN
ENERGIZED VBN
energy-cogeneration NN
ENERGY-COGENERATION NN
ENERGY-EFFICIENT JJ
energy-industry NN
ENERGY-INDUSTRY NN
ENERGY NN NNP
Energy NNP NN
ENERGY NNP NN
energy-services JJ NNS
ENERGY-SERVICES JJ NNS
ENERSEN NNP
ENFIELD NNP
enforced VBN
ENFORCED VBN
ENFORCEMENT NN NNP
Enforcement NNP NN
Enforcers NNS
ENFORCERS NNS
enforces VBZ
ENFORCES VBZ
enforce VB VBP
ENFORCE VB VBP
ENFORCING VBG
engaged VBN VBD JJ
ENGAGED VBN VBD JJ
ENGAGEMENT NN
ENGAGEMENTS NNS
engages VBZ
ENGAGES VBZ
engage VB VBP
ENGAGE VB VBP
engaging VBG JJ
ENGAGING VBG JJ
ENGELKEN NNP
engineered VBN JJ
ENGINEERED VBN JJ NNP
ENGINEERING NN NNP VBG
engineering NN VBG
engineer NN VB
ENGINEER NN VB
Engineers NNPS NNS NNP
ENGINEERS NNS NNPS NNP
ENGINE NN NNP
Engine NNP NN
ENGINES NNS
ENGLAND NNP
ENGLER NNP
ENGLEWOOD NNP
English-language JJ NN
ENGLISH-LANGUAGE JJ NN
ENGLISHMAN NNP
English NNP JJ NNS
ENGLISH NNP JJ NNS
English-speaking JJ
ENGLISH-SPEAKING JJ
ENGLISHWOMAN NNP
ENGLUND NNP
ENG NNP
ENGORGEMENT NN
ENGRAPH NNP
engraved VBN
ENGRAVED VBN
engulfed VBN VBD
ENGULFED VBN VBD
enhanced VBN JJ VBD
ENHANCED VBN JJ VBD
ENHANCEMENT NN
ENHANCEMENTS NNS NNP
enhances VBZ
ENHANCES VBZ
enhance VB
ENHANCE VB
ENHANCING VBG
ENICHEM NNP
ENID NNP
ENIGMA NN
ENIMONT NNP
en IN FW
EN IN FW
ENI NNP
enjoined VBN VBD
ENJOINED VBN VBD
enjoin VB
ENJOIN VB
ENJOYABLE JJ
enjoyed VBN VBD
ENJOYED VBN VBD
Enjoying VBG
ENJOYING VBG
ENJOYMENT NN
enjoys VBZ
ENJOYS VBZ
enjoy VB VBP
ENJOY VB VBP
enlarged JJ VBN
ENLARGED JJ VBN
ENLARGERS NNS
enlarge VB
ENLARGE VB
ENLARGING VBG
enlightened JJ VBN
ENLIGHTENED JJ VBN
ENLIGHTENING JJ VBG
enlightening VBG JJ
ENLIGHTENMENT NN
enlighten VB
ENLIGHTEN VB
enlisted VBD
ENLISTED VBD
ENLISTING VBG
enlist VB
ENLIST VB
ENLIVENING VBG
E. NNP
E NNP NN
ENNUI NN
ennumerated VBD
ENNUMERATED VBD
Enormous JJ
ENORMOUS JJ
ENORMOUSLY RB
Enough JJ NNP
enough RB JJ NN
ENOUGH RB JJ NN NNP
ENQUIRER NNP
ENRAGED JJ VBD
enraged VBD JJ
ENRICHING VBG
enrich VBP
ENRICH VBP
ENRIGHT NNP
ENRIQUE NNP
enrolled VBD VBN
ENROLLED VBD VBN
ENROLLEES NNS
ENROLLMENT NN
ENROLLMENTS NNS
ENROLL VBP VB
enroll VB VBP
ENRON NNP
enroute RB
ENROUTE RB
ensconced VBN
ENSCONCED VBN
ensemble NN
ENSEMBLE NN
ENSEMBLES NNS
ENSERCH NNP
ensnarled VBN
ENSNARLED VBN
ENSRUD NNP
ensued VBD
ENSUED VBD
ensue VB
ENSUE VB
ENSUING VBG
ensures VBZ
ENSURES VBZ
ensure VB VBP
ENSURE VB VBP
ENSURING VBG
entailed VBN
ENTAILED VBN
entails VBZ
ENTAILS VBZ
entail VB
ENTAIL VB
entangled JJ VBN
ENTANGLED JJ VBN
ENTE NNP
entered VBD VBN
ENTERED VBD VBN
ENTERGY NNP
ENTERING VBG NNP
ENTERPRISE NN NNP NNPS
Enterprise NNP NN NNPS
Enterprises NNPS NNP
ENTERPRISES NNS NNPS NNP
enterprising JJ
ENTERPRISING JJ
enters VBZ
ENTERS VBZ
ENTERTAINED VBD VBN
entertained VBN VBD
ENTERTAINERS NNS
entertaining JJ VBG
ENTERTAINING JJ VBG
Entertainment NNP NN
ENTERTAINMENT NNP NN
entertain VB
ENTERTAIN VB
Enter VB
enter VB VBP
ENTER VB VBP
ENTEX NNP
ENTHUSIASM NN
ENTHUSIASMS NNS
ENTHUSIASTICALLY RB
ENTHUSIASTIC JJ
ENTHUSIAST NN NNP
Enthusiasts NNS
ENTHUSIASTS NNS
enticed VBD
ENTICED VBD
entice VB VBP
ENTICE VB VBP
ENTICINGLY RB
ENTICING VBG
entire JJ NN
ENTIRE JJ NN
ENTIRELY RB
ENTIRETY NN
ENTITIES NNS
entitled VBN VBD
ENTITLED VBN VBD
ENTITLEMENT NN
ENTITLEMENTS NNS
entitles VBZ
ENTITLES VBZ
entitle VB VBP
ENTITLE VB VBP
ENTITLING VBG
ENTITY NN
entombed VBN
ENTOMBED VBN
ENTOURAGE NN
entranced VBN
ENTRANCED VBN
ENTRANCE NN
ENTRANTS NNS
entree FW
ENTREE FW
ENTREKIN NNP
entrenched VBN JJ
ENTRENCHED VBN JJ
ENTRENCHMENT NN
entrench VB
ENTRENCH VB
entrepreneurial JJ
ENTREPRENEURIAL JJ
ENTREPRENEUR NN
ENTREPRENEURSHIP NN
Entrepreneurs NNS
ENTREPRENEURS NNS
ENTRIES NNS
entrusted VBN
ENTRUSTED VBN
entrust VBP VB
ENTRUST VB VBP
ENTRY-LEVEL JJ
ENTRY NN
ENTRY-PRICE JJ
entwined VBN
ENTWINED VBN
ENUNCIATION NN
ENVELOPE NN
ENVELOPES NNS
ENVIABLE JJ
ENVIABLY RB
ENVIRONMENTAL-IMPACT JJ
ENVIRONMENTALISM NNP NN
ENVIRONMENTALIST NN
Environmentalists NNPS NNS
ENVIRONMENTALISTS NNS NNPS
environmental JJ
ENVIRONMENTAL JJ
ENVIRONMENTAL JJ NNP
ENVIRONMENTALLY RB
Environmental NNP JJ
ENVIRONMENT NN NNP
ENVIRONMENTS NNS
ENVIROPACT NNP
envisaged VBD VBN
ENVISAGED VBD VBN
envisioned VBN
ENVISIONED VBN
envisions VBZ
ENVISIONS VBZ
envision VBP VB
ENVISION VBP VB
ENVOY NN
envy NN VBP
ENVY NN VBP
envy-quotient NN
ENVY-QUOTIENT NN
ENZOR NNP
EONS NNS
EPA NNP
EPICENTER NN
epic NN
EPIC NN
EPICUREAN NN
epidemic NN
EPIDEMIC NN
EPIDEMIOLOGIST NN
EPILEPSY NNP NN
EPILEPTICS NNS
Epinalers NNPS
EPINALERS NNPS
EPINAL NNP
EPIPHANY NN
Episcopalians NNPS
EPISCOPALIANS NNPS
EPISODE NN
EPISODES NNS
EPISODIC JJ
epitomize VBP
EPITOMIZE VBP
EPO NNP
EPO-treated JJ
EPO-TREATED JJ
EPPELMANN NNP
EPPEL NNP
EPPLER NNP
EPP NNP
EPPS NNP
EPREX NNP
EPSIODE NN
EPSON NNP
equaled VBD VBN
EQUALED VBD VBN
EQUALING VBG
EQUALITY NN
equal JJ VB VBP
EQUAL JJ VB VBP NNP
Equally RB
EQUALLY RB
equal-opportunity NN
EQUAL-OPPORTUNITY NN
equals VBZ
EQUALS VBZ
equated VBN
EQUATED VBN
equates VBZ
EQUATES VBZ
equate VB
EQUATE VB
EQUATION NN
EQUESTRIANS NNS
EQUIFAX NNP
EQUILIBRIUM NN
EQUIMARK NNP
EQUIMENT NN
EQUIPMENT NN NNP
Equipment NNP NN
Equipped VBN
equipped VBN JJ VBD
EQUIPPED VBN VBD JJ
EQUIPPING VBG
equips VBZ
EQUIPS VBZ
equip VB
EQUIP VB
EQUITABLE NNP JJ
EQUITABLY RB
Equitec NNP NN
EQUITEC NNP NN
Equities NNPS NNS
EQUITIES NNS NNPS
EQUITY-INCOME NNP
EQUITY-LIKE JJ
EQUITY NN NNP
Equity NNP NN
equity-purchase JJ NN
EQUITY-PURCHASE JJ NN
equivalent NN JJ
EQUIVALENT NN JJ
Equivalents NNS
EQUIVALENTS NNS
EQUUS NNP
eradicate VB
ERADICATE VB
ERA NN NNP
Era NNP NN
ERASABLE JJ
erased VBN VBD
ERASED VBN VBD
ERASER-FITTED JJ
erases VBZ
ERASES VBZ
erase VB
ERASE VB
Erasing VBG
ERASING VBG
ERASURES NNS
ERATH NNP
Erbamont NNP NN
ERBAMONT NNP NN
ERBURU NNP
ERC NNP
ERDOLVERSORGUNGS NNP
ERDOS NNP
erected VBD VBN
ERECTED VBD VBN
erect VB
ERECT VB
erembal NNP
EREMBAL NNP
ERENSEL NNP
ERICH NNP
ERICKSON NNP
ERIC NNP
ERICSON NNP
ERIE NNP
ERIK NNP
Erithmatic NN
ERITHMATIC NN
Eritrean JJ
ERITREAN JJ
ERITREA NNP
Eritreans NNPS
ERITREANS NNPS
ERLE NNP
ERMANNO NNP
ERMA NNP
ERNEST NNP
ERNESTO NNP
E.R. NNP
ERNST NNP
eroded VBN VBD
ERODED VBN VBD
erodes VBZ
Erodes VBZ
ERODES VBZ
erode VB VBP
ERODE VB VBP
ERODING VBG
Erosion NN
EROSION NN
EROTIC NNP
ERRAND NN
errata NNS
ERRATA NNS
ERRATICALLY RB
ERRATIC JJ
ERRED VBD VBN
erred VBN VBD
ERROLL NNP
ERROL NNP
ERRONEOUS JJ
ERRONEOUSLY RB
ERROR NN
ERRORS NNS
errs VBZ
ERRS VBZ
Err VB
err VBP VB
ERR VB VBP
ersatz JJ
ERSATZ JJ
ERSKINE NNP
ERSKIN NNP
erudite JJ
ERUDITE JJ
er UH
Er UH
ER UH
erupted VBD VBN
ERUPTED VBD VBN
ERUPTION NN
erupts VBZ
ERUPTS VBZ
erupt VB
ERUPT VB
ERWIN NNP
ERYTHROPOIETIN NN
ESBER NNP
ESB NNP
ESCALANTE NNP
ESCALATED VBD VBN
escalated VBN VBD
escalate VB
ESCALATE VB
ESCALATING VBG
ESCALATION NN
ESCALATORS NNS
escaped VBD VBN
ESCAPED VBD VBN
escape VB NN
ESCAPE VB NN
ESCAPING VBG
eschewed VBN
ESCHEWED VBN
ESCORT NNP NN
Escorts NNS
escorts VBZ
ESCORTS VBZ NNS
escrowed VBN
ESCROWED VBN
ESCROW NN
ESCUDOME NNP
ESKANDARIAN NNP
ESKENAZI NNP
ESKRIDGE NNP
ESLINGER NNP
ESL NNP
ESNARD NNP
ESOP NNP
ESOPUS NNP
ESOTERIC JJ
ESPANA NNP
ESPANOL NNP
Especially RB
ESPECIALLY RB
ESPECTADOR NNP
ESPIONAGE NN
ESPLANADE NNP
ESPN NNP
ESP NNP
ESPOUSAL NN
espouse VBP
ESPOUSE VBP
ESPRE NNP
ESPRESSO NN
esprit FW
ESPRIT FW
ESPs NNPS NNS
ESPS NNPS NNS
ESSAR NNP
ESSAYIST NN
ESSAY NN
ESSAYS NNS
ESSELTE NNP
ESSENCE NN
essential JJ
ESSENTIAL JJ
Essentially RB
ESSENTIALLY RB
ESSENTIALS NNS
ESSEX NNP
Esso NNP NN
ESSO NNP NN
Established VBN
established VBN VBD JJ
ESTABLISHED VBN VBD JJ
establishes VBZ
ESTABLISHES VBZ
Establishing VBG
ESTABLISHING VBG
ESTABLISHMENT NN
ESTABLISHMENTS NNS
establish VB
Establish VB
ESTABLISH VB
establshed VBN
ESTABLSHED VBN
ESTATE NN NNP
ESTATES NNP
ESTATE-TAX JJ
ESTEE NNP
ESTELI NNP
ESTES NNP
ESTHER NNP
ESTIMABLE JJ
Estimated VBN JJ
estimated VBN VBD JJ
ESTIMATED VBN VBD JJ
estimate NN VBP VB
ESTIMATE NN VBP VB NNP
Estimates NNS
estimates NNS VBZ
ESTIMATES NNS VBZ
Estimating VBG
estimating VBG NN
ESTIMATING VBG NN
ESTIMATION NN
ESTIMATORS NNS
EST NNP NN RB
Estonian JJ
ESTONIAN JJ
Estonian-language JJ
ESTONIAN-LANGUAGE JJ
ESTONIA NNP
estranged VBN
ESTRANGED VBN
estrogen-replacement NN
ESTROGEN-REPLACEMENT NN
ESTUARIAN NN
e SYM LS NN
E SYM NN NNP LS
ETA NNP
et CC FW NNP
etc FW NN
etc. FW NN
ETC FW NN
ETC. FW NNP NN
eternal JJ
ETERNAL JJ
ETHAN NNP
ETHANOL NN
ETHEL NNP
ETHICAL JJ
Ethicist NN
ETHICIST NN
ETHICS NNS NNP
Ethiopian JJ
ETHIOPIAN JJ
Ethiopia NNP NN
ETHIOPIA NNP NN
ETHNICALLY RB
ETHNIC JJ
ETHNOGRAPHY NN
ethos NN
ETHOS NN
ETHYLENE NN
ETHYL NNP
ETIENNE-EMILE NNP
ETIQUETTE NN
ET NNP FW CC
ETUDES NNP
ETZIONI NNP
EUBANK NNP
eucalyptus NN
EUCALYPTUS NN
EUGENE NNP
EUPHEMISMS NNS
EUPHORIA NN NNP
Eurobond NNP NN
EUROBOND NNP NN
Eurobonds NNS NNPS
EUROBONDS NNS NNPS
EURO-COMMUNIST NNP
EUROCOM NNP
Euroconvertible JJ
EUROCONVERTIBLE JJ
Eurodebentures NNS
EURODEBENTURES NNS
EURODEBT NNP
Eurodollar NN JJ NNP
EURODOLLAR NN JJ NNP
EURODOLLARS NNS NNPS NNPS|NNS
Eurodynamics NNPS
EURODYNAMICS NNPS
Euroissues NNS
EUROISSUES NNS
EUROMARKET NNP
EURO NNP
Euronotes NNS
EURONOTES NNS
Europa NNP NN
EUROPA NNP NN
EUROPEAN-AMERICAN NNP
European JJ NNP
EUROPEAN JJ NNP
European-minded JJ
EUROPEAN-MINDED JJ
Europeans NNPS NNS
EUROPEANS NNPS NNS
EUROPE NNP
EUROSTAT NNP
EUROVISION NNP
evacuated VBN
EVACUATED VBN
evacuate VB
EVACUATE VB
EVACUATION NN
evaded VBN
EVADED VBN
EVADERS NNS
evades VBZ
EVADES VBZ
evade VB
EVADE VB
evaluated VBN VBD
EVALUATED VBN VBD
evaluates VBZ
EVALUATES VBZ
evaluate VB VBP
EVALUATE VB VBP
Evaluating VBG
EVALUATING VBG
EVALUATION NN
Evaluations NNS
EVALUATIONS NNS
EVANGELICAL JJ
evangelist-industrialist NN
EVANGELIST-INDUSTRIALIST NN
EVANGELIST NN
EVANGELISTS NNS
EVAN NNP
EVANS-BLACK NNP
EVANS NNP
EVANSTON NNP
evaporated VBD VBN
EVAPORATED VBD VBN
evaporate VB
EVAPORATE VB
EVAPORATION NN
EVASION NN
EVELYN NNP
evened VBN
EVENED VBN
EVENHANDED JJ
evening NN
EVENING NN NNP
EVENINGS NNS
EVENLY RB
EVE NN NNP
Even RB JJ
even RB JJ VB RB|JJ
EVEN RB JJ VB RB|JJ
EVENSONG NN
evens VBZ
EVENS VBZ
EVENT-DRIVEN JJ
Event NN NNP
EVENT NN NNP
Events NNS
EVENTS NNS
eventual JJ
EVENTUAL JJ
Eventually RB
EVENTUALLY RB
EVER-ANXIOUS JJ
EVER-CHANGING JJ
EVEREADY NNP
EVERETT NNP
EVEREX NNP
EVER-FASTER JJ
Everglades NNS
EVERGLADES NNS
EVER-GREATER JJ
EVER-GROWING JJ
everlasting JJ
EVERLASTING JJ
Ever-more RB
EVER-MORE RB
EVER-NARROWING JJ
EVER-OPTIMISTIC JJ
EVER-PRESENT JJ
ever RB
Ever RB
EVER RB
EVER-SWELLING JJ
Everybody NN
EVERYBODY NN
everyday JJ
EVERYDAY JJ
every DT
Every DT
EVERY DT
EVERYMAN NNP
Everyone NN
EVERYONE NN
everything NN
Everything NN NNP
EVERYTHING NN NNP
Everytime RB
EVERYTIME RB
everywhere RB
Everywhere RB
EVERYWHERE RB
EVIAN NNP
evidenced VBN
EVIDENCED VBN
Evidence NN
EVIDENCE NN
evident JJ
EVIDENT JJ
Evidently RB
EVIDENTLY RB
evil-doers NNS
EVIL-DOERS NNS
evil JJ NN
EVIL JJ NN NNP
EVIL-LOOKING JJ
EVINCED VBD VBN
evinced VBN VBD
EVISCERATING VBG
EVOCATIVE JJ
evokes VBZ
EVOKES VBZ
evoke VBP
EVOKE VBP
EVOKING VBG
EVOLUTIONARY JJ
EVOLUTION NN
evolved VBD VBN
EVOLVED VBD VBN
evolve VB
EVOLVE VB
EVOLVING VBG
EVREN NNP
EWARD NNP
EWDB NNP
EWING NNP
E.W. NNP
EXABYTE NNP
ex-accountant NN
EX-ACCOUNTANT NN
EXACERBATED VBD VBN
exacerbated VBN VBD
exacerbates VBZ
EXACERBATES VBZ
exacerbate VB
EXACERBATE VB
EXACERBATING VBG
exact JJ
Exact JJ
EXACT JJ
Exactly RB
EXACTLY RB
exaggerated JJ VBN
EXAGGERATED JJ VBN
exaggerate VB
EXAGGERATE VB
EXAMINATION NN NNP
EXAMINATIONS NNS
examined VBD VBN
EXAMINED VBD VBN
EXAMINER NN NNP
Examiners NNS
EXAMINERS NNS
examines VBZ
EXAMINES VBZ
EXAMINE VB
examine VB VBP
EXAMINE VB VBP
EXAMINING VBG
EXAM NN
Example NN
EXAMPLE NN
Examples NNS
EXAMPLES NNS
EXAMS NNS
EXASPERATION NN
ex-Attorney NNP
EX-ATTORNEY NNP
EXBT NNP
EXCALIBUR NNP
excavated VBN
EXCAVATED VBN
EXCAVATING VBG
EXCAVATOR NN
EXCAVATORS NNS
exceeded VBD VBN
EXCEEDED VBD VBN
EXCEEDINGLY RB
EXCEEDING VBG
exceeds VBZ
EXCEEDS VBZ
exceed VB VBP
EXCEED VB VBP
EXCELLENCE NN
excellent JJ
EXCELLENT JJ
EXCEL NNP VB VBP
EXCELSIOR NNP
excel VBP VB
Except IN
except IN VB
EXCEPT IN VB
exceptional JJ
EXCEPTIONAL JJ
EXCEPTIONALLY RB
EXCEPTION NN
EXCEPTIONS NNS
EXCERPT NN
Excerpts NNS
EXCERPTS NNS
EXCESSES NNS
EXCESSIVE JJ
EXCESSIVELY RB
excess JJ NN
EXCESS JJ NN
EXCHANGEABLE JJ
exchanged VBD VBN
EXCHANGED VBD VBN
EXCHANGE-LISTED JJ
EXCHANGE NN
Exchange NNP NN
EXCHANGE NNP NN VB VBP
exchange NN VB VBP
exchange-rate NN JJ
EXCHANGE-RATE NN JJ
EXCHANGES NNS
EXCHANGING VBG
EXCHEQUER NNP NN
EX-CHIEF JJ
excised VBD VBN
EXCISED VBD VBN
excise NN VB JJ
EXCISE NN VB JJ
Excise-tax JJ
EXCISE-TAX JJ
Excision NN
EXCISION NN
EXCITED JJ VBN
excited VBN JJ
EXCITEMENT NN
excite VB
EXCITE VB
exciting JJ
EXCITING JJ
exclaims VBZ
EXCLAIMS VBZ
Excluded VBN
excluded VBN VBD
EXCLUDED VBN VBD
Excludes NNS
excludes VBZ
EXCLUDES VBZ NNS
exclude VB VBP
EXCLUDE VB VBP
Excluding VBG NNP
EXCLUDING VBG NNP
EXCLUSIONARY JJ
EXCLUSION NN
EXCLUSIONS NNS
Exclusive JJ
EXCLUSIVE JJ
EXCLUSIVELY RB
EXCLUSIVITY NN
excorciate VB
EXCORCIATE VB
excoriated VBN
EXCORIATED VBN
excretory JJ
EXCRETORY JJ
EXCRUTIATINGLY RB
EXCURSIONS NNS
excursus NN
EXCURSUS NN
excused VBN
EXCUSED VBN
excuse NN VB
EXCUSE NN VB
Excuses NNPS
EXCUSES NNS NNPS
EXCUTIVES NNS
ex-dividend JJ NN
Ex-dividend NN
EX-DIVIDEND NN JJ
EXECS NNS
Executed VBD
executed VBN VBD JJ
EXECUTED VBN VBD JJ
executes VBZ
EXECUTES VBZ
execute VB VBP
EXECUTE VB VBP
EXECUTING VBG
EXECUTION NN NNP
Executions NNS
EXECUTIONS NNS
EXECUTIVE-BRANCH JJ
EXECUTIVE-LEGISLATIVE JJ
EXECUTIVE-LEVEL JJ
EXECUTIVE-MODEL JJ
executive NN JJ
EXECUTIVE NN JJ NNP
Executive NNP NN
executive-office NN
EXECUTIVE-OFFICE NN
EXECUTIVES NNPS NNS
Executives NNS NNP
EXECUTIVES NNS NNP NNPS
EXECUTOR NN
EXECUTORS NNS
EXEMPLAR NN
EXEMPLARY JJ
exemplified VBN
EXEMPLIFIED VBN
exemplifies VBZ
EXEMPLIFIES VBZ
ex-employees NNS
EX-EMPLOYEES NNS
ex-employer NN
EX-EMPLOYER NN
exempted VBN
EXEMPTED VBN
EXEMPTING VBG
EXEMPTION NN
EXEMPTIONS NNS
exempt JJ VB
EXEMPT JJ VB
EXERCISABLE JJ
exercised VBN VBD
EXERCISED VBN VBD
exercise NN VB VBP
EXERCISE NN VB VBP
exercises VBZ NNS
EXERCISES VBZ NNS
EXERCISING VBG
EXERPTS NNS
exerted VBN
EXERTED VBN
EXERTING VBG
exert VB
EXERT VB
EXETER NNP
ex FW JJ
exhaled VBD
EXHALED VBD
Exhausted JJ
exhausted VBN VBD
EXHAUSTED VBN VBD JJ
exhausting JJ VBG
EXHAUSTING JJ VBG
EXHAUSTION NN
EXHAUSTIVE JJ
exhaust NN VBP VB
EXHAUST VB VBP NN
exhibited VBN
EXHIBITED VBN
EXHIBITING VBG
EXHIBITION NN
EXHIBITIONS NNS
Exhibit NN
exhibit NN VB
EXHIBIT NN VB
EXHIBITORS NNS
exhibits VBZ NNS
EXHIBITS VBZ NNS
exhilarating JJ
EXHILARATING JJ
EXHILARATION NN
exhort VB
EXHORT VB
ex-hurler NN
EX-HURLER NN
exiled VBD VBN
EXILED VBD VBN
EXILE NN
EX-IM NNP
EX-INVESTMENT JJ
EXISTANCE NN
existed VBD VBN
EXISTED VBD VBN
EXISTENCE NN
EXISTENTIALIST NN
existent JJ
EXISTENT JJ
Existing JJ VBG
existing VBG JJ
EXISTING VBG JJ
exists VBZ
EXISTS VBZ
exist VB VBP
EXIST VB VBP
exited VBD
EXITED VBD
EXIT-LOAD JJ
Exit NN
exit NN VB
EXIT NN VB
exits NNS VBZ
EXITS NNS VBZ
EX JJ FW
ex-Marine NN
EX-MARINE NN
ex-member NN
EX-MEMBER NN
EXOCET NNP
exodus NN
EXODUS NN NNP
exonerated VBD VBN
EXONERATED VBD VBN
EXONERATING VBG
exorbitant JJ
EXORBITANT JJ
exorcise VB
EXORCISE VB
EXORCISM NN
EXORCISMS NNS
EXORCIST NN
EXOTIC JJ
expanded VBN VBD JJ
EXPANDED VBN VBD JJ
EXPANDING-PROFIT JJ
EXPANDING VBG
expands VBZ
EXPANDS VBZ
expand VB VBP
EXPAND VB VBP
EXPANSE NN
EXPANSIONARY JJ
EXPANSIONISM NN
EXPANSIONISTS NNS
EXPANSION-MINDED JJ
Expansion NN
EXPANSION NN
EXPANSIONS NNS
EXPANSIVE JJ
EXPECTANCY NN
expectant JJ
EXPECTANT JJ
EXPECTATION NN
Expectations NNS
EXPECTATIONS NNS
expected VBN VBD JJ VB
EXPECTED VBN VBD JJ VB
EXPECTING VBG
Expects NNS
expects VBZ
EXPECTS VBZ NNS
Expect VB
EXPECT VBP
expect VBP VB IN
EXPECT VBP VB IN
EXPEDIENTS NNS
expedited VBN JJ
EXPEDITED VBN JJ
expedite VB
EXPEDITE VB
EXPEDITING VBG
EXPEDITION NN
EXPEDITIOUSLY RB
expelled VBN VBD
EXPELLED VBN VBD
expel VB
EXPEL VB
EXPENDABLE JJ
expended VBN
EXPENDED VBN
EXPENDITURE NN
Expenditures NNPS
expenditures NNS VBZ
EXPENDITURES NNS VBZ NNPS
expense-account NN
EXPENSE-ACCOUNT NN
Expense NN
EXPENSE NN
Expenses NNS
EXPENSES NNS
expensive JJ RB
EXPENSIVE JJ RB
EXPENSIVE-TO-PRODUCE JJ
Experienced VBN
experienced VBN JJ VBD
EXPERIENCED VBN JJ VBD
Experience NN
experience NN VB VBP
EXPERIENCE NN VB VBP
experiences NNS VBZ
EXPERIENCES NNS VBZ
EXPERIENCING VBG
experimental JJ
EXPERIMENTAL JJ
EXPERIMENTALLY RB
EXPERIMENTATION NN
experimented VBN VBD
EXPERIMENTED VBN VBD
EXPERIMENTING VBG
EXPERIMENT NN
Experiments NNS
EXPERIMENTS NNS
EXPERTISE NN
expert NN JJ
EXPERT NN JJ
Experts NNS
EXPERTS NNS
EXPIRATION NN
EXPIRATIONS NNS
expired VBD VBN JJ
EXPIRED VBD VBN JJ
expires VBZ
EXPIRES VBZ
expire VB VBP
EXPIRE VB VBP
EXPIRING VBG
explained VBD VBN
EXPLAINED VBD VBN
Explaining VBG
EXPLAINING VBG
explains VBZ
Explains VBZ
EXPLAINS VBZ
explain VB VBP
EXPLAIN VB VBP
EXPLANATION NN
EXPLANATIONS NNS
explanatory JJ
EXPLANATORY JJ
ex-player NN
EX-PLAYER NN
expletive NN
EXPLETIVE NN
explicit JJ
EXPLICIT JJ
EXPLICITLY RB
exploded VBD VBN
EXPLODED VBD VBN
explodes VBZ
EXPLODES VBZ
explode VB
EXPLODE VB
EXPLODING VBG
exploited VBN
EXPLOITED VBN
EXPLOITER NN
EXPLOITERS NNS
EXPLOITING VBG
exploits NNS VBZ
EXPLOITS VBZ NNS
exploit VB VBP
EXPLOIT VB VBP
EXPLONAFT NNP
EXPLORATION NN NNP
Exploration NNP NN
exploratory JJ
EXPLORATORY JJ
EXPLORER NNP
explores VBZ
EXPLORES VBZ
explore VB VBP
EXPLORE VB VBP
EXPLORING VBG
EXPLOSION NN
Explosions NNS
EXPLOSIONS NNS
EXPLOSIVE JJ
EXPLOSIVELY RB
EXPLOSIVES NNS
EXPLUSION NN
EXPO NN NNP
Expo NNP NN
EXPORT-BOOSTING JJ
EXPORT-CONTROL JJ
exported VBN VBD
EXPORTED VBN VBD
EXPORTER NN
EXPORTERS NNS
EXPORT-IMPORT NNP
EXPORTING NNP VBG
Export NNP NN
export NN VB JJ VBP
EXPORT NN VB NNP JJ VBP
EXPORT-ORIENTED JJ
EXPORT-RELATED JJ
Exports NNS
exports NNS VBZ
EXPORTS NNS VBZ
exposed VBN VBD JJ
EXPOSED VBN VBD JJ
expose VB VBP
EXPOSE VB VBP
exposing VBG JJ
EXPOSING VBG JJ
EXPOSITION NN
EXPOSURE NN
EXPOSURES NNS
EXPOUNDING VBG
ex-president NN
ex-President NNP JJ
EX-PRESIDENT NNP NN JJ
EXPRESS-BUICK NNP
expressed VBD VBN
EXPRESSED VBD VBN
expresses VBZ
EXPRESSES VBZ
EXPRESSING VBG
EXPRESSION NN
EXPRESSIONS NNS
EXPRESSIVE JJ
EXPRESSLY RB
Express NNP NN
EXPRESS NNP VB VBP JJ NN
express VB VBP JJ
expunged VBN
EXPUNGED VBN
expunge VB
EXPUNGE VB
exquisite JJ
EXQUISITE JJ
extended VBN VBD JJ
EXTENDED VBN VBD JJ
EXTENDING VBG
extends VBZ
EXTENDS VBZ
extend VB VBP
EXTEND VB VBP
EXTENSION NN NNP
Extensions NNS
EXTENSIONS NNS
EXTENSIVE JJ
EXTENSIVELY RB
EXTENT NN
EXTERIOR NNP
Exteriors NNS
EXTERIORS NNS
EXTERMINATION NN
external JJ
EXTERNAL JJ NNP
EXTERNALLY RB
EXTERNAL-TRADE JJ
EXTINCTION NN
extinct JJ
EXTINCT JJ
extinguish VB
EXTINGUISH VB
extorted VBD
EXTORTED VBD
EXTORTING VBG
EXTORTION NN
extort VB
EXTORT VB
extracted VBN VBD
EXTRACTED VBN VBD
EXTRACTING VBG
EXTRACTION NN
EXTRACTS NNS
extract VB NN
EXTRACT VB NN
extracurricular JJ
EXTRACURRICULAR JJ
extradited VBN
EXTRADITED VBN
EXTRADITION NN
EXTRADITIONS NNS
extra JJ
EXTRA JJ
extramarital JJ
EXTRAMARITAL JJ
extramural JJ
EXTRAMURAL JJ
EXTRA-NASTY JJ
EXTRANEOUS JJ
EXTRAORDINARILY RB
Extraordinary JJ
EXTRAORDINARY JJ
extrapolated VBN
EXTRAPOLATED VBN
EXTRAS NNS
extraterrestrial JJ
EXTRATERRESTRIAL JJ
EXTRAVAGANCE NN
extravagant JJ
EXTRAVAGANT JJ
extreme JJ NN
EXTREME JJ NN
EXTREMELY RB
EXTREMES NNS
EXTREMIST NN
EXTREMISTS NNS
extricate VB
EXTRICATE VB
EXTRUSION NN
EXTRUSIONS NNS
EXUBERANCE NN
exuded VBD
EXUDED VBD
exude VBP
EXUDE VBP
ex-wife NN
EX-WIFE NN
Exxon NNP NN
EXXON NNP NN
Exxon-owned JJ
EXXON-OWNED JJ
EYEBALLING VBG
EYEBALL NN
EYEBALLS NNS
eye-blink NN
EYE-BLINK NN
EYEBROW NN
EYEBROWS NNS
EYE-CATCHING JJ
eyed VBD
EYED VBD
EYEGLASSES NNS
EYEING VBG
EYE NN NNP
EYE-POPPING JJ
Eyes NNS
EYES NNS
EYEWITNESSES NNS
eyewitness NN
EYEWITNESS NN
EYING VBG
EYP NNP
EZEKIEL NNP
E-Z JJ
EZRA NNP
F-14 NN
F-15 NNP NN
F-16 NNP NN CD
F16s NNS
F16S NNS
F-18 NN
F-18s NNS
F18s NNS
F-18S NNS
F18S NNS
F-20 NNP
F-20s NNPS
F-20S NNPS
F\/A18 CD
F-A-18 NN
F\/A-18 NN
FAA NNP
FABBRI NNP
FABERGE NNP
FABER NNP
FABIAN NNP
FABI NNP
FABLED JJ
fable NN
FABLE NN
FAB NNP
fabricated VBN
FABRICATED VBN
fabricate VB
FABRICATE VB
FABRICATION NN
FABRICATIONS NNS
FABRICATOR NN
FABRICATORS NNS
fabric NN
Fabric NN
FABRIC NN
FABRICS NNS NNP
FABULOUS JJ NNP
Fabulous NNP JJ
FACADE NN
FACADES NNS
FACE-AMOUNT JJ
Faced VBN
faced VBN VBD
FACED VBN VBD
FACELIFT NN
FACELIFTS NNS
face NN VB VBP JJ
FACE NN VB VBP JJ NNP
FACE-SAVING JJ
faces VBZ NNS
FACES VBZ NNS
FACETIOUSLY RB
face-to-face JJ RB
FACE-TO-FACE JJ RB
facial JJ
FACIAL JJ
facilitate VB VBP
FACILITATE VB VBP
FACILITATING VBG
Facilities NNPS NNP
FACILITIES NNS NNPS NNP
FACILITY NN NNP
FACINGS NNS
FACING VBG
facsimile JJ NN
FACSIMILE JJ NN
FACSIMILES NNS
FACT-BOUND JJ
fact-finder NN
FACT-FINDER NN
FACT-FINDING JJ
FACTION NN
FACTIONS NNS
FACT NN
facto FW JJ
FACTO FW JJ
FACTORED JJ
FACTOREX NNP
Factories NNS
FACTORIES NNS
Factoring NN
factoring NN VBG
FACTORING NN VBG
Factor NN
factor NN VB
FACTOR NN VB
factors NNS VBZ
FACTORS NNS VBZ
factory-jobs NNS
FACTORY-JOBS NNS
factory-modernization NN
FACTORY-MODERNIZATION NN
Factory NN NNP
FACTORY NN NNP
FACTS NNS
factual JJ
FACTUAL JJ
FACTUALLY RB
Faculty NN
FACULTY NN
FADA NNP
faded VBN VBD
FADED VBN VBD
FADES NNS
fade VB
FADE VB
FADING VBG JJ NN
fading VBG NN JJ
FAD NN
FADS NNS
FAGENSON NNP
FAGERSHEIN NNP
FAHD NNP
Fahrenheit NN NNP
FAHRENHEIT NNP NN
FAILED VBD
failed VBD VBN JJ
FAILED VBD VBN JJ
FAILINGS NNS
FAILING VBG
fails VBZ
Fails VBZ
FAILS VBZ
Failure NN
FAILURE NN
Failures NNS
FAILURES NNS
FAILURE-TO-SUPERVISE JJ
fail VB VBP
FAIL VB VBP
faintest JJS
FAINTEST JJS
fainting NN VBG
FAINTING NN VBG
faint JJ VB
FAINT JJ VB
fairer JJR
FAIRER JJR
Fairfax NNP NN
FAIRFAX NNP NN
FAIRFIELD NNP
fair JJ NN
FAIR JJ NNP NN
FAIRLAWN NNP
FAIRLESS NNP
FAIRLY RB
FAIR-MARKET JJ
fairness NN
FAIRNESS NN NNP
Fair NNP NN
FAIRS NNS
FAIR-TRADE-RELATED JJ
FAIR-USE JJ
FAIRWAY NN
FAIRY NN
FAITHFULLY RB
faithful NN JJ
FAITHFUL NN JJ
FAITH NN NNP
FAIT NN
FAJITAS NNS
faked VBD VBN
FAKED VBD VBN
FAKE JJ
fake JJ NN
FAKE JJ NN
FAKING VBG
FAKTY NNP
FALCONBRIDGE NNP
Falcon NNP NN
FALCON NNP NN
FALCO NNP
Falcons NNPS
FALCONS NNPS
FALKLAND NNP
FALLACIOUS JJ
FALLACY NN
FALLBACK JJ NN
fallback NN JJ
fallen VBN JJ
FALLEN VBN JJ
FALLIBLE JJ
falling VBG NN
FALLING VBG NN
Fall NN
FALL NN
fall NN VB VBP
FALL NN VB VBP
FALLOFF NN
FALLON NNP
FALLOUT NN NNP
fallow JJ
FALLOW JJ
Falls NNP NNPS
FALLS VBZ NNP NNS NNPS
falls VBZ NNS
false JJ
FALSE JJ
FALSELY RB
falseness NN
FALSENESS NN
falsified VBN
FALSIFIED VBN
FALSIFYING VBG
falsify VB
FALSIFY VB
faltered VBD VBN
FALTERED VBD VBN
FALTERING VBG
falters VBZ
FALTERS VBZ NNP
falter VBP
FALTER VBP
famed JJ VBN
FAMED JJ VBN
FAME NN NNP
FAMILIA NNP
FAMILIARITY NN
FAMILIARIZATION NN
familiarize VB
FAMILIARIZE VB
familiar JJ
FAMILIAR JJ
Families NNS
FAMILIES NNS
family NN
FAMILY NN
FAMILY NN NNP
Family NNP NN
FAMILY-ORIENTED JJ
Family-owned JJ
FAMILY-OWNED JJ
family-planning JJ NN
FAMILY-PLANNING JJ NN
FAMILY-RUN JJ
Famine NN
FAMINE NN
FAMINES NNS
FAMOUS JJ NNP
FAMOUSLY RB
FANATIC JJ
FANATICS NNS
fancier JJR
FANCIER JJR
fanciest JJS
FANCIEST JJS
fancies VBZ
FANCIES VBZ
FANCIFUL JJ
fancy JJ NN
FANCY JJ NN
FANCY'SHVARTZER NN
FANFARE NN
FANG NNP
FANGS NNS
fanned VBD
FANNED VBD
FANNIE NNP
FAN NN
fan NN VB
FAN NN VB
F.A. NNP
FANNY NN
Fans NNS
fans NNS VBZ
FANS NNS VBZ
FANTASIA NNP
FANTASIES NNS
fantasize VBP VB
FANTASIZE VB VBP
FANTASTIC JJ
FANTASTICO NNP
FANTASY NNP NN
FANUC NNP
F.A.O. NNP
FAR-AFIELD JJ
faraway JJ
FARAWAY JJ
FARCE NN
fared VBD VBN
FARED VBD VBN
fare NN VBP VB
FARE NN VBP VB
FARENTINO NNP
Fares NNS
fares NNS VBZ
FARES NNS VBZ
Fare VBP
FARFETCHED JJ
FAR-FLUNG JJ
FAR-FROM-CONCILIATORY JJ
FARGO NNP
far-left JJ NN
FAR-LEFT NN JJ
FARLEY NNP
FARMER NN NNP
Farmers NNP NNPS NNS
FARMERS NNS
FARMERS NNS NNP NNPS
FARMING NN NNP VBG
farming NN VBG
FARMINGTON NNP
Farm-machine NN
FARM-MACHINE NN
FARM NN
FARM NN NNP VB
Farm NNP NN
farm NN VB
farm-product NN
FARM-PRODUCT NN
farms NNS VBZ
FARMS NNS VBZ
FARMSTEADS NNS
FARM-SUPPLY JJ
FARM-TRADE JJ
FARMWIVES NNS
FARNEY NNP
FARNHAM NNP
Far NNP RB JJ
FAROOQUEE NNP
FARRAR NNP
FAR RB
far RB JJ IN
FAR RB NNP JJ IN
FAR-REACHING JJ
FARRELL NNP
FARREN NNP
FAR-RIGHT JJ
FARR NNP
farther RBR RB
FARTHER RBR RB
farthest JJS
FARTHEST JJS
Fas-antigen NN
FAS-ANTIGEN NN
FASB NNP
fascinated VBN
FASCINATED VBN
fascinating JJ
FASCINATING JJ
FASCINATION NN
FASCISM NN
fascist JJ
FASCIST JJ
FASCISTS NNS
fashionable JJ NN
FASHIONABLE JJ NN
fashioned VBN
FASHIONED VBN
FASHION NN NNP VB
Fashion NNP NN
fashion NN VB
FASHIONS NNS
FASO NNP
FASSBINDER NNP
FAST-APPROACHING JJ
FASTBALL NN
FASTBALLS NNS
FASTENAL NNP
fastened VBN
FASTENED VBN
FASTENER NN
FASTENERS NNS
faster-growing JJR
FASTER-GROWING JJR
faster RBR JJR
FASTER RBR JJR
FASTER-SPENDING JJ
fastest-growing JJ JJS
FASTEST-GROWING JJ JJS
fastest JJS
FASTEST JJS
Fast-food NN
FAST-FOOD NN
fast-food NN JJ
FAST-FOOD NN JJ
FAST-GROWING JJ
FASTIDIOUS JJ
FAST-MOVING JJ
FAST-PACED JJ
fast RB JJ
FAST RB JJ
FAST-SELLING JJ
FAST-SHRINKING JJ
FAST-TRACK JJ
Fatah NNP NN
FATAH NNP NN
Fatalities NNS
FATALITIES NNS
FATALITY NN
fatal JJ
FATAL JJ
FATE NN NNP
father-in-law NN
FATHER-IN-LAW NN
FATHER NN NNP
Fathers NNS
FATHERS NNS
FATHI NNP
fat JJ NN
FAT JJ NN NNP
FATMAN NNP
FATS NNS
fattened VBN VBD
FATTENED VBN VBD
fattening NN
FATTENING NN
fatten VBP
FATTEN VBP
fatter JJR
FATTER JJR
FAT-TIRED JJ
FATUOUS JJ
FAULDING NNP
FAULKNER NNP
faulted VBN
FAULTED VBN
FAULTLESS JJ
FAULTLESSLY RB
FAULTLINES NNS
FAULT NN NNP VBP
fault NN VBP
FAULTS NNS
FAULT-TOLERANT JJ
faulty JJ
FAULTY JJ
fauna NNS
FAUNA NNS
faux JJ
FAUX JJ
Favorable JJ
FAVORABLE JJ
FAVORABLY RB
Favored JJ
favored VBN VBD JJ
FAVORED VBN VBD JJ
FAVORING VBG
favorite JJ NN
FAVORITE JJ NN NNP
Favorite NNP JJ
FAVORITES NNS
FAVORITISM NN
favor NN VBP VB
FAVOR NN VBP VB
favors VBZ NNS
FAVORS VBZ NNS
FAWNING VBG
FAWN NNP
faxed VBD
FAXED VBD
FAXES NNS
FAX NN NNP
Fax NNP NN
FAY NNP
FAZIO NNP
FBI NNP
FCB\/LEBER NNP
FCC NNP
F.C NNP
FDA-approved JJ
FDA-APPROVED JJ
FDA NNP
FDIC NNP
feared VBD VBN JJ
FEARED VBD VBN JJ
FEARFUL JJ
FEARING VBG
FEARLESS JJ
Fear NN
FEAR NN
fear NN VBP VB
FEAR NN VBP VB
FEARON NNP
Fears NNS
fears NNS VBZ
FEARS NNS VBZ
fearsome JJ
FEARSOME JJ
FEASIBILITY NN
FEASIBLE JJ
feasted VBN
FEASTED VBN
FEASTS NNS
FEATHERLESS JJ
FEATHERS NNS
FEATHERSTON NNP
FEAT NN
FEATS NNS
featured VBN VBD JJ
FEATURED VBN VBD JJ
FEATURELESS JJ
feature NN VB VBP
FEATURE NN VB VBP
Features NNPS
features NNS VBZ
FEATURES NNS VBZ NNPS
FEATURING VBG
FEB. NNP
FEBRUARY NNP
fecal JJ
FECAL JJ
FECKLESS JJ
FEDDERS NNP
FEDERAL-COURT JJ
FEDERAL-FORMULA JJ
FEDERALIST NNP
FEDERALIZED JJ
federal JJ
FEDERAL JJ NNP
FEDERAL-LOCAL JJ
FEDERALLY RB
FEDERAL-MOGUL NNP
Federal NNP JJ
FEDERAL NNP JJ
FEDERAL-SYSTEMS JJ
FEDERATED NNP
FEDERATION NNP NN
FEDERICO NNP
FEDERS NNP
FED NNP VBN NN VBD JJ
fed VBN NN VBD JJ
FEEBLE JJ
FEEDBACK NN
FEEDING NN NNP VBG
feeding NN VBG
FEEDLOT NN
Feedlots NNS
FEEDLOTS NNS
feed NN VB VBP
FEED NN VB VBP
FEEDSTOCK NN
feeds VBZ
FEEDS VBZ
fee-forfeiture NN
FEE-FORFEITURE NN
FEE-FOR-SERVICE JJ
FEELERS NNS
FEEL-GOOD JJ
feeling NN VBG
FEELING NN VBG
Feelings NNS
FEELINGS NNS
Feeling VBG
feels VBZ
Feels VBZ
FEELS VBZ
feel VBP VB NN
FEEL VBP VB NN
Fee NN
FEE NN
Fees NNS
FEES NNS
FEESS NNP
feet NNS
FEET NNS
FEICK NNP
FEIGEN NNP
FEINMAN NNP
feisty JJ
FEISTY JJ
FELDEMUEHLE NNP
FELDENE NNP
FELDMAN NNP
FELDSTEIN NNP
feline JJ
FELINE JJ
FELIPE NNP
FELIX NNP
FELLAS NNS
FELLED VBD
FELLED VBD VBN
felled VBN
FELLINI NNP
fellow NN JJ
FELLOW NN JJ NNP
Fellow NNP NN
FELLOWSHIP NNP
FELLOWS NNS
fell VBD JJ NN VBN
FELL VBD JJ NN VBN
FELONIES NNS
FELON NN
FELONS NNS
FELONY NN
FELTEN NNP
FELTES NNP
felt VBD VBN
FELT VBD VBN
FEMALE-HEADED JJ
female JJ NN
FEMALE JJ NN
Females NNPS
FEMALES NNS NNPS
FEMA NNP
FEMINA NNP
FEMININE-CARE JJ
feminine JJ
FEMININE JJ
FEMININITY NN
FEMINISM NN
feminist JJ NN
FEMINIST JJ NN NNP
FEMINISTS NNS
FENCE NN
FENCES NNS
fencing NN
FENCING NN
fended VBD
FENDED VBD
FENDER NN
Fending VBG
FENDING VBG
fend VB
FEND VB
FENERTY NNP
FENG-HSIUNG NNP
FENIGER NNP
FENNEL NN
FENN NNP
F.E. NNP
FE NNP
FENTON NNP
FENUGREEK NN
FEODOR NNP
FERC NNP
FERDINAND NNP
FEREMBAL NNP
FERGUSON NNP
FERNANDEZ NNP
FERNAND NNP
FERNANDO NNP
FERN-LIKE JJ
FEROCIOUS JJ
FEROCIOUSLY RB
FERRANTI NNP
FERREIRA NNP
FERRER NNP
FERRETING VBG
ferret VB
FERRET VB
FERRIER NNP
FERRIES NNS
ferris JJ
FERRIS JJ
FERROELECTRIC JJ
FERRON NNP
FERRO NNP
FERRUZZI NNP
FERRYING VBG
ferry NN VB
FERRY NN VB
fertile JJ
FERTILE JJ
FERTILITY-CONTROL JJ
FERTILITY NN
FERTILIZATION NN
fertilized VBN
FERTILIZED VBN
FERTILIZER NN
FERTILIZERS NNS
FERTILIZING VBG
FERTITTA NNP
fervente NNP
FERVENTE NNP
fervent JJ
FERVENT JJ
FERVENTLY RB
FERVOR NN
FERY NNP
FESHBACH NNP
fester VB
FESTER VB
FESTIVAL NN NNP
FESTIVALS NNS
FESTIVA NNP
FESTIVE JJ
FESTIVITIES NNS
FESTIVITY NN
fest JJS NN
FEST NN JJS
festooned VBN
FESTOONED VBN
FESTOONING VBG
fetal JJ
FETAL JJ
fetal-tissue JJ NN
FETAL-TISSUE JJ NN
fetched VBD
FETCHED VBD
fetches VBZ
FETCHES VBZ
FETCHINGLY RB
FETCHING VBG
fetch VB VBP
FETCH VB VBP
FETISH NN
FETUSES NNS
fetus NN
FETUS NN
feudal JJ
FEUDAL JJ
feuded VBD
FEUDED VBD
feuding VBG NN
FEUDING VBG NN
Feud NN
FEUD NN
Fever NN
FEVER NN
Fewer JJR
FEWER JJR
fewer JJR RBR
FEWER JJR RBR
FEWER-THAN-EXPECTED JJ
fewest JJS
FEWEST JJS
few JJ
Few JJ
FEW JJ
FEZ-WEARING JJ
FFr SYM
FFR SYM
FH-77B NNP
FHA-insured JJ
FHA-INSURED JJ
FHA NNP
FHLBB NNP
F.H. NNP
FIALA NNP
FIANCEE NN
FIASCO NN
FIAT NNP NN
FIBERALL NNP
FIBERCOM NNP
FIBER-END JJ
FIBERGLAS NNP
FIBERGLASS NNS
FIBER NN
FIBER-OPTIC JJ
FIBER-RELATED JJ
FIBERS NNS
FIBREBOARD NNP
FICIALS NNS
fickle JJ
FICKLE JJ
fickleness NN
FICKLENESS NN
fictional JJ
FICTIONAL JJ
FICTION NN
FICTITIOUS JJ
ficus NN
FICUS NN
FIDDLE NN
fiddling NN
FIDDLING NN
fide JJ
FIDE JJ
FIDELITY NNP
FIDEL NNP
FIDGETING VBG
FIDUCIARY JJ
FIECHTER NNP
FIEDLER NNP
FIEFDOMS NNS
FIELD-CROP-SEEDS JJ
fielded VBD VBN
FIELDED VBD VBN
fielding NN VBG
FIELDING NN VBG
FIELD NN NNP VB
Field NNP NN
field NN VB
FIELD-SERVICES JJ
Fields NNP NNPS
FIELDS NNS NNP VBZ NNPS
fields NNS VBZ
FIENBERG NNP
fierce JJ
Fierce JJ
FIERCE JJ
FIERCELY RB
FIERO NNP
Fiery JJ
FIERY JJ
FIESTA NNP
Fifteen CD
FIFTEEN CD
fifteenfold RB
FIFTEENFOLD RB
FIFTEENTH NNP
FIFTH-BIGGEST JJ
FIFTH-CONSECUTIVE JJ
FIFTH-GENERATION JJ
fifth-grade NN
FIFTH-GRADE NN
fifth JJ RB NN
FIFTH-LARGEST JJ
Fifth NNP JJ
FIFTH NNP JJ NN RB
Fifty-two JJ
FIFTY-TWO JJ
FIGGIE NNP
fighter-bombers NNS
FIGHTER-BOMBERS NNS
FIGHTER NN NNP
fighter-plane NN
FIGHTER-PLANE NN
FIGHTERS NNS
Fighting NN NNP
fighting VBG NN
FIGHTING VBG NN NNP
fight NN VB VBP
FIGHT NN VB VBP
fights NNS VBZ
FIGHTS NNS VBZ
Fight VB
FIG NNP
FIGURATIVE JJ
FIGURATIVELY RB
figured VBD VBN
FIGURED VBD VBN
Figure NN NNP
figure NN VB VBP
FIGURE NN VB VBP NNP
Figures NNS
figures NNS VBZ
FIGURES NNS VBZ
Figuring VBG
FIGURING VBG
FILBERTS NNS
filched VBN
FILCHED VBN
filed VBN VBD
FILED VBN VBD
FILENE NNP
FILENET NNP
FILERS NNS
files NNS VBZ
FILES NNS VBZ
file VB NN VBP
FILE VB NN VBP
filial JJ
FILIAL JJ
FILIBUSTER NN
filigree JJ
FILIGREE JJ
filing NN VBG
FILING NN VBG
FILINGS NNS
Filipino NNP JJ
FILIPINO NNP JJ
Filipinos NNPS NNS
FILIPINOS NNPS NNS
filled VBN VBD
FILLED VBN VBD
FILLER NN
Filling VBG
filling VBG NN
FILLING VBG NN
FILLMORE NNP
FILL-OR-KILL JJ NNP
fills VBZ
FILLS VBZ
fill VB VBP NN
FILL VB VBP NN
filly NN
FILLY NN
Filmed VBN
filmed VBN VBD
FILMED VBN VBD
FILMING VBG
film-maker NN
FILM-MAKER NN
film-makers NNS
FILM-MAKERS NNS
FILM NN NNP
film-processing NN
FILM-PROCESSING NN
FILMS NNS
FILMWORKS NNP
filtered VBN
Filtered VBN
FILTERED VBN
FILTERING VBG
FILTER NN NNP
filters NNS VBZ
FILTERS NNS VBZ
FILTH NN
FILTRATION NN
finagled VBN
FINAGLED VBN
finagling NN
FINAGLING NN
Final-hour JJ
FINAL-HOUR JJ
FINALISTS NNS
finalized VBN VBD
FINALIZED VBN VBD
FINALIZING VBG
final JJ
Final JJ NNP
FINAL JJ NNP
Finally RB
FINALLY RB
FINALS NNS
financed VBN VBD
FINANCED VBN VBD
FINANCEER NN
Finance NNP NN
finance NN VB
FINANCE NN VB NNP
FINANCER NN
FINANCES NNS
finances NNS VBZ
FINANCES NNS VBZ
financial-aid NN
FINANCIAL-AID NN
financial-crimes NNS
FINANCIAL-CRIMES NNS
FINANCIAL-DATA JJ
FINANCIAL-INDUSTRIAL JJ
financial JJ
FINANCIAL JJ NNP
Financially RB
FINANCIALLY RB
financial-market NN
FINANCIAL-MARKET NN
Financial NNP JJ
FINANCIAL-PLANNING JJ
FINANCIAL-RELATED JJ
FINANCIAL-REPORT JJ
FINANCIAL-SERVICE JJ
financial-services NNS JJ
FINANCIAL-SERVICES NNS JJ
FINANCIALS NNP
FINANCIERE NNP
FINANCIER NN
FINANCIERS NNS
Financing NNP NN
financing NN VBG
FINANCING NN VBG NNP
FINANCINGS NNS
FINANCO NNP
finanicial JJ
FINANICIAL JJ
FINA NNP
FINANZIARIA NNP
FINANZIARIO NNP
FINDINGS NNS
finding VBG NN
FINDING VBG NN NNP
Finding VBG NNP
FINDLAY NNP
finds VBZ NNS
FINDS VBZ NNS
Find VBP
find VB VBP
FIND VB VBP
fine-arts NNS
FINE-ARTS NNS
fined VBN VBD
FINED VBN VBD
FINELY RB
FINE NN JJ NNP VB RB NNPS
fine NN JJ VB RB
Fine NNP JJ NNPS
FINERY NN
FINES NNS NNP
finessed VBN
FINESSED VBN
finest JJS
FINEST JJS
FINE-TUNED JJ
fine-tuning NN VB
FINE-TUNING VB NN
fingered VBN
FINGERED VBN
FINGERING NN VBG
fingering VBG NN
FINGERLINGS NNS
finger NN VB
FINGER NN VB
finger-pointing NN JJ
FINGER-POINTING NN JJ
FINGERPRINT NN
FINGERPRINTS NNS
FINGERS NNS NNP
FINING VBG
finished VBD VBN JJ VB
FINISHED VBD VBN JJ VB
finishes NNS VBZ
FINISHES VBZ NNS
finishing VBG JJ
FINISHING VBG JJ
finish VB NN VBP
FINISH VB NN VBP
FINIS NNP
finite JJ
FINITE JJ
FINKELSTEIN NNP
FINK NNP
FINKS NNP
Finland NNP NN
FINLAND NNP NN
FINLEY NNP
FINMECCANICA NNP
FINNAIR NNP
FINNERTY NNP
FINNEY NNP
FINNIE NNP
Finnish JJ
FINNISH JJ
FINN NNP
FINSBURY NNP
Fin-syn JJ
FIN-SYN JJ
FINUCANE NNP
FIO NNP
FIORELLO NNP
FIORINI NNP
Firearms NNPS
FIREARMS NNPS
FIREBALL NN
FIREBALLS NNS
FIREBIRD NNP
fired VBN VBD
FIRED VBN VBD
FIRE-ENGINE JJ
FIREFIGHTERS NNS
firefighting NN
FIREFIGHTING NN
FIREHOOPS NNS
Fireman NNP NN
FIREMAN NNP NN
firemen NNS
FIREMEN NNS
FIRE NN NNP VB
Fire NNP NN
fire NN VB
FIREPLACE NN
FIREPLACES NNS
fireproofing NN VBG
FIREPROOFING NN VBG
FIRESIDE\/SIMON NNP
fires NNS VBZ
FIRES NNS VBZ
FIRESTONE NNP
Fires VBZ
FIREWATER NN
FIREWORKS NNS
firing NN VBG
FIRING NN VBG
FIRINGS NNS
FIRMA NN
firmed VBD VBN
FIRMED VBD VBN
firmer JJR RBR
FIRMER JJR RBR
FIRMING VBG
FIRMLY RB
firmness NN
FIRMNESS NN
Firm NN JJ
firm NN JJ VB
FIRM NN JJ VB NNP
FIRM NN NNP
FIRMS NNS
Firms NNS NNPS NNP
FIRMS NNS NNPS NNP
FIRST-AMENDMENT JJ
FIRST-BASE JJ
First CD JJ NNP RB LS 
FIRST CD NNP RB
FIRST-CLASS JJ
FIRST-EVER JJ
first-floor NN
FIRST-FLOOR NN
first-grader NN
FIRST-GRADER NN
first-half JJ NN
FIRST-HALF JJ NN
FIRST-HAND JJ
firsthand RB JJ
FIRSTHAND RB JJ
FIRST-HOME JJ
FIRST JJ NNP RB LS NN JJS CD
first JJ RB NN LS JJS
FIRST-MORTGAGE JJ
FIRST-NINE-MONTH JJ
first-person NN
FIRST-PERSON NN
FIRST-PHASE JJ
first-quarter JJ NN
FIRST-QUARTER JJ NN
FIRST-RATE JJ
First-round JJ
FIRST-ROUND JJ
First-section JJ
FIRST-SECTION JJ
FIRSTSOUTH NNP
FIRST-TERM JJ
FIRST-THREE JJ
FIRST-TIME JJ
FIRST-YEAR JJ
FISCAL-FIRST JJ
FISCAL-FIRST-QUARTER JJ
fiscal JJ NN IN
Fiscal JJ NN NNP
FISCAL JJ NN NNP IN
FISCAL-THIRD JJ
Fiscal-year JJ
fiscal-year NN
FISCAL-YEAR NN JJ
FISCHER NNP
FISHBOWL NN
Fisheries NNPS
FISHERIES NNS NNPS
fishermen NNS
FISHERMEN NNS
FISHER NNP
FISHERY NN NNP
FISH-EXPORT JJ
fishing NN VBG
FISHING NN VBG
fishing\/processing JJ
FISHING\/PROCESSING JJ
FISHKILL NNP
FISHMAN NNP
Fish NN
fish NN RB
FISH NN RB
FISH-PROCESSING JJ
FISKE NNP
FISSURES NNS
fist NN RB
FIST RB NN
FISTS NNS
FITCHBURG NNP
FITCH NNP
fitness NN
FITNESS NN NNP
FITNESS-PROMOTING JJ
fits VBZ NNS
FITS VBZ NNS
fittest JJS
FITTEST JJS
fitting JJ NN
FITTING JJ NN
Fittingly RB
FITTINGLY RB
fit VB NN JJ VBP VBN
FIT VB NN VBP JJ VBN
FITZGERALD NNP
FITZSIMMONS NNP
FITZWATER NNP
FITZWILLIAM NNP
FITZWILLIAMS NNP
five-and-dime NN
FIVE-AND-DIME NN
FIVE-BLOCK JJ
FIVE-BY-EIGHT-INCH JJ
five CD
Five CD
FIVE CD
FIVE-CENT JJ
FIVE-CONSECUTIVE JJ
FIVE-COURSE JJ
FIVE-CYLINDER JJ
FIVE-DAY JJ
fivefold JJ RB
FIVEFOLD JJ RB
FIVE-GAME JJ
FIVE-HOME-RUN JJ
FIVE-HOUR JJ
FIVE-INCH JJ
FIVE-MEMBER JJ
FIVE-MONTH-OLD JJ
FIVE-NATION JJ
FIVE-POINT JJ
FIVE-SESSION JJ
FIVE-STORY JJ
FIVE-WEEK JJ
fiveyear JJ
FIVE-YEAR JJ
FIVEYEAR JJ
FIVE-YEAR-OLD JJ
FIXATION NN
FIXED-DOLLAR JJ
Fixed-income JJ
fixed-income JJ NN
FIXED-INCOME JJ NN
FIXED-PRICE JJ
fixedrate JJ
FIXED-RATE JJ
FIXEDRATE JJ
fixed VBN JJ VBD
FIXED VBN JJ VBD
FIXES NNS
FIXING VBG
FIXTURE NN
FIXTURES NNS
fix VB NN
FIX VB NN
FIXX NNP
FIZKULTURA NNP
fizzes VBZ
FIZZES VBZ
fizzled VBD VBN
FIZZLED VBD VBN
F.J. NNP
FK-506 NNP
Fla.-based JJ
FLA.-BASED JJ
flabbergasted VBN
FLABBERGASTED VBN
flabbiness NN
FLABBINESS NN
flag-burner NN
FLAG-BURNER NN
flag-burning NN
FLAG-BURNING NN
flagging JJ
FLAGGING JJ
FLAG NN
flagrante FW
FLAGRANTE FW
flagrant JJ
FLAGRANT JJ
flagship NN JJ
FLAGSHIP NN JJ
Flags NNS
FLAGS NNS
FLAHERTY NNP
FLAIR NN
Flakes NNPS NNP
FLAKES NNPS NNP
flaky JJ
FLAKY JJ
flamboyant JJ
FLAMBOYANT JJ
flamed VBD
FLAMED VBD
FLAME NN
FLAMES NNS
FLAMINGO NNP
FLAMMABLE JJ
Flanked VBN
FLANKED VBN
FLANKER NN
FLA NNP
FLA. NNP
FLAP NN
FLAPPING VBG
FLAPS NNS
flared VBN
FLARED VBN
flare VBP
FLARE VBP
FLARING VBG
FLASHBACK NN
FLASHBACKS NNS
FLASHDANCE NNP
flashed VBD VBN
FLASHED VBD VBN
flashes NNS VBZ
FLASHES NNS VBZ
flashier JJR
FLASHIER JJR
FLASHING VBG
FLASHLIGHT NN
FLASHLIGHTS NNS
FLASHPOINT NN
flash VBP NN VB
FLASH VB VBP NN
flashy JJ
FLASHY JJ
flat-footed RB
FLAT-FOOTED RB
FLAT-HEADED JJ
Flat JJ NNP
flat JJ RB NN
FLAT JJ RB NN NNP
FLATLY RB
flatness NN
FLATNESS NN
FLAT-OUT JJ
FLATOUT NN
FLAT-PANEL JJ
FLAT-ROLLED JJ
FLATS NNS NNP
FLATTAU NNP
flattened VBN VBD
FLATTENED VBN VBD
FLATTENING VBG
flatten VB
FLATTEN VB
flattering JJ
FLATTERING JJ
FLATTERY NN
FLAT-TO-LOWER JJ
flatulent JJ
FLATULENT JJ
flaunts VBZ
FLAUNTS VBZ
flaunt VB
FLAUNT VB
FLAVIO NNP
FLAVOR NN
FLAVORS NNS
flawed VBN JJ
FLAWED VBN JJ
FLAWLESS JJ
FLAW NN
Flaws NNS
FLAWS NNS
flay VB
FLAY VB
FLEA NN
FLEAS NNS
FLECKENSTEIN NNP
FLEDGING VBG
fledgling NN JJ
FLEDGLING NN JJ
fled VBD VBN
FLED VBD VBN
fleeced VBN
FLEECED VBN
FLEEING VBG
fleeting JJ
FLEETING JJ
fleet NN JJ
FLEET NN NNP JJ
FLEET\/NORSTAR NNP
fleets NNS VBZ
FLEETS NNS VBZ
FLEETWOOD NNP
flee VB
FLEE VB
FLEISCHER NNP
FLEISCHMANN NNP
FLEMING NNP
FLEMINGS NNP
Flemish JJ
FLEMISH JJ
Flesh NN
FLESH NN
FLESHPOTS NNS
FLETCHER NNP
flew VBD
FLEW VBD
FLEXIBILITY NN
Flexible JJ NNP
FLEXIBLE JJ NNP
FLEXING VBG
flex JJ
FLEX JJ
FLEX-TIME JJ
FLEXTIME NN
flickered VBD
FLICKERED VBD
FLICKING VBG
FLICK NN
Flick NN NNP
flied VBD
FLIED VBD
FLIER NN
FLIERS NNS
flies VBZ NNS
FLIES VBZ NNS
flight-attendants NNS
FLIGHT-ATTENDANTS NNS
flightiness NN
FLIGHTINESS NN
FLIGHT NN
FLIGHT NN NNP
Flight NNP NN
Flights NNS
FLIGHTS NNS
flight-to-quality NN
FLIGHT-TO-QUALITY NN
flim-flammery NN
FLIM-FLAMMERY NN
flim-flam NN
FLIM-FLAM NN
flimsy JJ
FLIMSY JJ
flinch VB
FLINCH VB
FLINGING VBG
fling NN
FLING NN
FLINGS NNS
FLINT NNP
FLIP-FLOP JJ NN
flip-flop NN JJ
FLIP-FLOPPED JJ
flip JJ VB
flippant JJ
FLIPPANT JJ
flipped VBD
FLIPPED VBD
FLIPPING VBG
FLIPPO NNP
flips VBZ
FLIPS VBZ
FLIP VB JJ
FLIRTATION NN
FLIRTED VBD VBN
flirted VBN VBD
FLIRTING VBG
floated VBD VBN
FLOATED VBD VBN
floating-point JJ NN
FLOATING-POINT NN JJ
floating-rate JJ NN
FLOATING-RATE JJ NN
floating VBG JJ
Floating VBG JJ
FLOATING VBG JJ
floats VBZ
FLOATS VBZ
float VB VBP NN
FLOAT VB VBP NN
flocked VBD VBN
FLOCKED VBD VBN
FLOCKING VBG
FLOCK NN
flog VB
FLOG VB
FLOM NNP
flooded VBN VBD
FLOODED VBN VBD
flooding NN VBG
FLOODING NN VBG
FLOODLIGHTS NNP
flood NN VB
FLOOD NN VB NNP
flooring NN
FLOORING NN
FLOOR NN NNP
Floor NNP NN
FLOORS NNS
FLOP NN
flopped VBD VBN
FLOPPED VBD VBN
FLOPPIES NNS
floppy-disk NN
FLOPPY-DISK NN
floppy JJ
FLOPPY JJ
FLOPPY-TIE JJ
floral JJ
FLORAL JJ NNP
flora NNS
FLORA NNS
FLORENCE NNP
FLORIDA NNP
FLORIO NNP
FLOSS NNP
FLOTATIONS NNS
FLOTILLA NN
FLOTTL NNP
floundered VBN
FLOUNDERED VBN
FLOUNDERING VBG
flounder VB
FLOUNDER VB
FLOURISHED VBD VBN
flourished VBN VBD
flourishing JJ VBG
FLOURISHING JJ VBG
flourish VB
FLOURISH VB
FLOUTING VBG
FLOWCHART NN
flowed VBD
FLOWED VBD
FLOWER-BORDERED JJ
FLOWER-INSCRIBED JJ
FLOWER NN NNP
Flowers NNPS NNS
FLOWERS NNS NNPS
flowing VBG JJ
FLOWING VBG JJ
flow NN VB VBP
FLOW NN VB VBP NNP
flown VBN
FLOWN VBN
flows NNS VBZ
FLOWS NNS VBZ
FLOYD NNP
FLUCTUATED VBD VBN
fluctuated VBN VBD
fluctuates VBZ
FLUCTUATES VBZ
fluctuate VBP VB
FLUCTUATE VBP VB
FLUCTUATING VBG
Fluctuation NN
FLUCTUATION NN
FLUCTUATIONS NNS
fluent JJ
FLUENT JJ NNP
FLUFF NN
fluffy JJ
FLUFFY JJ
fluid JJ NN
FLUID JJ NN
FLUIDS NNS
FLUKE NN
FLU-LIKE JJ
FLUNKING VBG
flunk VBP
FLUNK VBP
FLUNKY NN
FLU NN
FLUORIDE NN
FLUOR NNP
FLUOROPOLYMER NN
FLUOROPOLYMERS NNS
FLURRY NN
Flush JJ
flush JJ VBP VB
FLUSH JJ VB VBP
fluting NN
FLUTING NN
FLUX NN
FLY-BY-NIGHT JJ
fly-fishing NN
FLY-FISHING NN
FLYING VBG NNP
FLYNN NNP
Fly VB
fly VB VBP NN
FLY VB VBP NN
FMC NNP
FMHA NNP
FMI NNP
FM NNP JJ NN
FM NNP NN JJ
F NN NNP
F. NNP
FOAMING VBG
FOAM NN
f.o.b JJ
F.O.B JJ
focal JJ
FOCAL JJ
focused VBN VBD JJ
FOCUSED VBN VBD JJ
focuses VBZ
FOCUSES VBZ
FOCUS-GROUP JJ
Focusing VBG
FOCUSING VBG
focus VB NN VBP
FOCUS VB NN VBP
FODDER NN
FOE NN
FOERSTER NNP
FOES NNS
FOGGED JJ
FOGG NNP
FOGGS NNP
foggy JJ
FOGGY JJ
Fog NN
FOG NN VB
fog VB NN
foiled JJ VBD VBN
Foiled VBN
FOILED VBN VBD JJ
FOILING VBG
foil NN VB
FOIL VB NN
FOKKER NNP
FOLCROFT NNP
FOLDABILITY NN
FOLDABLE JJ
folded VBD VBN
FOLDED VBD VBN
FOLDERS NNS
FOLDING NN JJ VBG
folding VBG JJ NN
fold VB VBP
FOLD VB VBP
FOLEY NNP
FOLGERS NNP
FOLIO NN
folkish JJ
FOLKISH JJ
FOLKLORE NN
Folk NN NNP
FOLK NN NNP
Folks NNS
FOLKS NNS
folksy JJ
FOLKSY JJ
FOLLIES NNS
followed VBN VBD JJ
FOLLOWED VBN VBD JJ
FOLLOWER NN
FOLLOWERSHIP NN
FOLLOWERS NNS
Following VBG
following VBG JJ NN
FOLLOWING VBG JJ NN
FOLLOW-ON JJ
follows VBZ
FOLLOWS VBZ
FOLLOW-THROUGH JJ
Follow-up JJ
FOLLOW-UP JJ
Follow VB
follow VB VBP
FOLLOW VB VBP
folly NN
FOLLY NN
FOLSOM NNP
FOMENTING VBG
FONCIER NNP
FONDA NNP
fondest JJS
FONDEST JJS
fond JJ
FOND JJ NNP
FONDLY RB
fondness NN
FONDNESS NN
Fond NNP JJ
food-fish NNS
FOOD-FISH NNS
FOOD-IMPORTING JJ
food-industry NN
FOOD-INDUSTRY NN
FOOD NN
FOOD NN NNP
Food NNP NN
FOOD-POISONING JJ
food-processing NN JJ
FOOD-PROCESSING NN JJ
food-production NN
FOOD-PRODUCTION NN
FOOD-SAFETY JJ
FOODSERVICE NN
food-service NN JJ
FOOD-SERVICE NN JJ
food-services NNS
FOOD-SERVICES NNS
FOOD-SHOP JJ
Foods NNP NNPS
FOODS NNP NNPS NNS
FOODSTUFF NN
FOODSTUFFS NNS
fooled VBN
FOOLED VBN
foolhardy JJ
FOOLHARDY JJ
fooling NN VBG
FOOLING NN VBG
foolish JJ
FOOLISH JJ
fool NN VB
FOOL NN VB
FOOLS NNS
FOOTAGE NN
FOOTBALL NN NNP
Football NNP NN
foot-dragging NN
FOOT-DRAGGING NN
FOOTE NNP
Foothills NNP NNS
FOOTHILLS NNP NNS
FOOTHOLD NN
footing NN VBG
FOOTING NN VBG
FOOT NN NNP VB VBP
Foot NNP NN
foot NN VBP VB
footnoted VBN
FOOTNOTED VBN
FOOTNOTE NN
FOOTNOTES NNS
FOOTSTEPS NNS
FOOT-TALL JJ
FOOT-THICK JJ
FOOTWEAR NN
FORAY NN
FORAYS NNS
forbade VBD
FORBADE VBD
FORBEARANCE NN
FORBES NNP
forbidden VBN
FORBIDDEN VBN
FORBIDDING-LOOKING JJ
FORBIDDING VBG
forbids VBZ
FORBIDS VBZ
forced VBN VBD JJ
FORCED VBN VBD JJ
FORCEFUL JJ
FORCEFULLY RB
forcefulness NN
FORCEFULNESS NN
FORCE NN VB NNP VBP
force NN VB VBP
Forces NNS NNP NNPS
forces NNS VBZ
FORCES NNS VBZ NNP NNPS
FORCE VBP
forcing VBG JJ
FORCING VBG JJ
FORDHAM NNP
FORD NNP
FORECASTER NN
FORECASTERS NNS
Forecasting NN
forecasting NN VBG
FORECASTING NN VBG
forecast NN VBN VBD VBP VB
FORECAST NN VBN VBD VBP VB
Forecasts NNS
forecasts NNS VBZ
FORECASTS NNS VBZ
Foreclosed VBN
foreclosed VBN VBN|JJ JJ VBD
FORECLOSED VBN VBN|JJ VBD JJ
FORECLOSURE NN NNP
Foreclosures NNS
FORECLOSURES NNS
FOREFATHERS NNS
FOREFRONT NN
foregone JJ
FOREGONE JJ
FOREGROUND NN
FOREHEAD NN
foreign-aid NN
FOREIGN-AID NN
FOREIGN-BANK JJ
foreign-car NN
FOREIGN-CAR NN
FOREIGN-COUNTRY JJ
foreign-currency NN JJ
FOREIGN-CURRENCY NN JJ
FOREIGN-DEBT JJ NN
foreign-debt NN JJ
Foreigners NNS
FOREIGNERS NNS
Foreign-exchange NN
foreign-exchange NN JJ
FOREIGN-EXCHANGE NN JJ
FOREIGN-INVESTMENT JJ
foreign-investor NN
FOREIGN-INVESTOR NN
foreign JJ
FOREIGN JJ NNP
FOREIGN-LED JJ
FOREIGN-LOAN JJ
Foreign NNP JJ
foreign-ownership NN
FOREIGN-OWNERSHIP NN
foreign-policy NN
FOREIGN-POLICY NN
FOREIGN-STOCK JJ
FOREIGN-TRADE JJ
FOREIGN-TRADING JJ
FOREMAN NN
Foremost NNP RB
foremost RB JJ
FOREMOST RB JJ NNP
FORE NN
FORENSIC JJ
FORENSICS NNS
FORERUNNERS NNS
foresaw VBD
FORESAW VBD
FORESEEABLE JJ
foreseen VBN
FORESEEN VBN
foresees VBZ
FORESEES VBZ
foresee VBP VB
FORESEE VBP VB
foreshadowed VBN
FORESHADOWED VBN
Foresight NN
FORESIGHT NN
FOREST NN NNP
Forest NNP NN
forest-product NN
FOREST-PRODUCT NN
Forest-products NNS
forest-products NNS JJ
FOREST-PRODUCTS NNS JJ
FORESTRY NN
FORESTS NNS
FORET NNP
forever RB
FOREVER RB
FORFEITABLE JJ
FORFEITURE NN NNP
FORFEITURES NNS
forfeit VB
FORFEIT VB
forged VBN
FORGED VBN
FORGERIES NNS
FORGER NN
FORGERY NN
forgets VBZ
FORGETS VBZ
FORGETTABLE JJ
FORGETTING VBG
Forget VB
forget VB VBP
FORGET VB VBP
forge VB
FORGE VB NNP
FORGINGS NNS
FORGING VBG
forgiveness NN
FORGIVENESS NN
forgiven VBN
FORGIVEN VBN
forgive VB
FORGIVE VB
FORGIVING JJ VBG
forgiving VBG JJ
forgotten VBN JJ
FORGOTTEN VBN JJ
FORGOT VBD VBN
forgot VBN VBD
forgo VB
FORGO VB
For IN
FOR IN
for IN RP RB
FOR IN RP RB
FORKED VBD VBN
forked VBN VBD
FORKLIFTS NNS
fork VB
FORK VB
forlorn JJ
FORLORN JJ
FORLORNLY RB
forma FW
FORMA FW
FORMALDEHYDE NN
FORMALITIES NNS
FORMALITY NN
formalizes VBZ
FORMALIZES VBZ
formal JJ
FORMAL JJ
Formally RB
FORMALLY RB
FORMAN NNP
FORMATION NN
FORMAT NN
FORMATS NNS
FORMBY NNP
Formed VBN
formed VBN VBD JJ
FORMED VBN VBD JJ
FORMER JJ
former JJ NN
FORMER JJ NNP NN
Formerly RB
FORMERLY RB
Former NNP JJ
FORMIDABLE JJ
FORMING VBG
form-letter NN
FORM-LETTER NN
Form NN NNP
form NN VB VBP
FORM NN VB VBP NNP
forms NNS VBZ
FORMS NNS VBZ
FORMULA NN
FORMULAS NNS
formulated VBN
FORMULATED VBN
formulates VBZ
FORMULATES VBZ
formulate VB
FORMULATE VB
FORMULATING VBG
FORMULATION NN
FORMULATIONS NNS
FOR-PROFIT JJ
FORRESTAL NNP
FORRESTER NNP
FORREST NNP
forsaken VBN
FORSAKEN VBN
FORSTER NNP
FORSTMANN NNP
FORTE NNP
forthcoming JJ
FORTHCOMING JJ
forth RB
FORTH RB
forthright JJ
FORTHRIGHT JJ
FORTHRIGHTLY RB
fortified VBN
FORTIFIED VBN
FORTNEY NNP
FORT NNP
FORTUITOUS JJ
fortunate JJ
FORTUNATE JJ
Fortunately RB
FORTUNATELY RB
FORTUNE NN NNP
FORTUNES NNS
Forty CD
FORTY CD
Forty-five CD
FORTY-FIVE CD
FORUM NN NNP
FORUMS NNS
forwarding NN
FORWARDING NN
FORWARD-RATE JJ
forward RB JJ VB
FORWARD RB JJ VB
forwards RB
FORWARDS RB
FOSSAN NNP
FOSSET NNP
FOSSETT NNP
FOSSEY NNP
fossil JJ NN
FOSSIL NN JJ
FOSSILS NNS
fostered VBD VBN
FOSTERED VBD VBN
FOSTERING VBG
foster JJ VB
FOSTER NNP JJ VB
fought VBD VBN
FOUGHT VBD VBN
FOULDS NNP
fouled VBN
FOULED VBN
fouling NN
FOULING NN
foul JJ
FOUL JJ
FOUL-MOUTHED JJ
FOUL-SMELLING JJ
foul-up NN
FOUL-UP NN
FOUNDATION NNP NN
FOUNDATIONS NNS
founded VBD VBN
Founded VBN
FOUNDED VBN VBD
foundered VBD
FOUNDERED VBD
foundering VBG JJ
FOUNDERING VBG JJ
FOUNDER NN
Founders NNP NNS
FOUNDERS NNS NNP
founding NN VBG JJ
FOUNDING NN VBG JJ
Founding VBG
found VBD VBN
FOUND VBD VBN
FOUNTAINHEAD NN
FOUNTAIN NN NNP
FOUNTAINS NNS
four-bagger NN
FOUR-BAGGER NN
four CD
Four CD NNP
FOUR CD NNP
FOUR-CENTS-A-SHARE JJ
FOUR-COLOR JJ
FOUR-CRATE JJ
FOUR-CYLINDER JJ
FOUR-DAY JJ
FOUR-DOOR JJ
FOUR-FAMILY JJ
Four-fifths NNS
FOUR-FIFTHS NNS
four-fold RB
FOUR-FOLD RB
FOUR-FOOT-HIGH JJ
four-for-one RB
FOUR-FOR-ONE RB
FOUR-GAME JJ
FOUR-HOUR JJ
FOUR-INCH JJ
FOUR-MAN JJ
FOUR-MEGABIT JJ
FOUR-MEMBER JJ
FOUR-MILE JJ
FOUR-MONTH JJ
FOURNIER NNP
FOUR-PAGE JJ
FOUR-PART JJ
FOUR-POINT JJ
FOUR-QUARTER JJ
FOUR-ROOM JJ
FOUR-SQUARE-BLOCK JJ
four-square NN
FOUR-SQUARE NN
FOUR-STAR JJ
FOUR-STOCK JJ
FOUR-STROKE JJ
fourteen CD
Fourteen CD
FOURTEEN CD
FOURTH-BIGGEST JJ
FOURTH-GRADE JJ
Fourth JJ
fourth JJ RB
FOURTH JJ RB
FOURTH-LARGEST JJ
FOURTH-LEVEL JJ
fourth-quarter JJ NN
FOURTH-QUARTER JJ NN
FOURTHQUARTER NN
FOURTH-RANKING JJ
four-to-one RB
FOUR-TO-ONE RB
FOUR-WEEK JJ
four-wheel-drive NN
FOUR-WHEEL-DRIVE NN
FOUR-YEAR JJ
FOUR-YEAR-OLD JJ
foward JJ
FOWARD JJ
FOWLER NNP
FOWL NN
FOXES NNS
FOX-MEYER NNP
FOXMOOR NNP
FOX NN
FOX NNP NN
FOX-PITT NNP
FOYER NN
FOY NNP
FPL NNP
FRABOTTA NNP
fracas NN
FRACAS NN
fractional JJ
FRACTIONAL JJ
FRACTIONALLY RB
FRACTIONING VBG
FRACTION NN
FRACTIONS NNS
FRACTIOUS JJ
fractured JJ VBD VBN
FRACTURED VBD JJ VBN
FRACTURE NN
FRACTURING NNP
fragile JJ
FRAGILE JJ
FRAGILITY NN
FRAGMENTATION NN
fragmented JJ VBN
FRAGMENTED JJ VBN
FRAGMENT NN
fragments NNS VBZ
FRAGMENTS NNS VBZ
FRAGRANCE NN
frail JJ
FRAIL JJ
FRAILTIES NNS
FRAMATOME NNP
framed VBN
FRAMED VBN
frame NN VB
FRAME NN VB
FRAMERS NNS
FRAMES NNS
FRAMEWORK NN NNP
FRAMINGHAM NNP
FRAMING NN VBG
framing VBG NN
FRANCAISES NNP
FRANCAIS NNP
FRANC-DENOMINATED JJ
FRANCE NNP
FRANCESCO NNP
FRANCES NNP
FRANCHISED JJ VBN
franchised VBN JJ
FRANCHISEE NN
Franchisees NNS
FRANCHISEES NNS
franchise NN VB
FRANCHISE NN VB
FRANCHISER NN
FRANCHISERS NNS
franchises NNS VBZ
FRANCHISES NNS VBZ
FRANCHISING VBG
FRANCHISOR NN
Franciscan JJ
FRANCISCAN JJ
FRANCISCANS NNP NNS
Franciscans NNS NNP
Francisco-area JJ NNP
FRANCISCO-AREA NNP JJ
Francisco-based JJ
FRANCISCO-BASED JJ
FRANCISCO NNP
FRANCISCO-OAKLAND NNP
FRANCIS NNP
FRANCISO NNP
FRANC NN
FRANCOISE NNP
FRANCOIS NNP
FRANCOIS-PONCET NNP
FRANCONIA NNP
FRANCO NNP
FRANCS NNS
FRANKEL NNP
FRANKENBERRY NNP
FRANKENSTEIN NNP
Frankfurt NNP NN NNPS
FRANKFURT NNP NN NNPS
franking NN
FRANKING NN
frank JJ
FRANKLIN NNP
FRANKLIN-TROUT NNP
FRANKLYN NNP
Frankly RB NNP
FRANKLY RB NNP
FRANK NNP JJ
FRANTICALLY RB
FRANTIC JJ
FRANZ NNP
FRASER NNP
FRATERNITIES NNS
FRATERNITY NN
FRAUD NN NNP
Fraud NNP NN
FRAUDS NNS
fraudulent JJ
FRAUDULENT JJ
FRAUDULENTLY RB
fraught JJ
FRAUGHT JJ
FRAUMENI NNP
FRAWLEY NNP
frayed VBN
FRAYED VBN
fray NN VB
FRAY NN VB
FRAZER NNP
FRAZIER NNP
freaked VBN
FREAKED VBN
FREAKISHLY RB
FREAKS NNS
FREDDIE NNP
FREDERICK NNP
FREDERIC NNP
FRED NNP
FREDRIC NNP
FREEBERG NNP
FREE-CHOICE JJ
FREEDMAN NNP
Freed NNP VBN
FREEDOM NN NNP
Freedom NNP NN
FREEDOMS NNS
FREED VBD
freed VBN VBD
FREED VBN VBD NNP
free-enterprise NN
FREE-ENTERPRISE NN
free-fall JJ NN
FREEFALL NN
FREE-FALL NN JJ
free-floater NN
FREE-FLOATER NN
free-for-all NN
FREE-FOR-ALL NN
FREEHOLDERS NNS
freeing VBG NN
FREEING VBG NN
FREE JJ NNP VB RB VBP JJ|RB
free JJ VB RB JJ|RB VBP
FREE-LANCE JJ
FREELY RB
FREEMAN NNP
freemarket JJ
FREEMARKET JJ
free-market JJ NN
FREE-MARKET JJ NN
Free NNP JJ RB
FREE-ON-BOARD JJ
FREEPORT-MCMORAN NNP
FREEPORT NNP
freer JJR
FREER JJR
free-speech NN
FREE-SPEECH NN
FREESPENDER NN
FREE-SPENDING JJ
FREE-STANDING JJ
frees VBZ
FREES VBZ
FREE-TRADE JJ
FREE-TRAVEL JJ
FREEWAY NN NNP
FREEWAYS NNS
freewheeling JJ
FREE-WHEELING JJ
FREEWHEELING JJ
Freeze NN
freeze NN VB
FREEZE NN VB
FREEZER NN
FREEZERS NNS
freezes VBZ NNS
FREEZES VBZ NNS
freezing NN
FREEZING NN
FREIE NNP
FREIGHT-COST JJ
FREIGHTERS NNS
FREIGHT NN NNP VB
Freight NNP NN
freight NN VB
FREIGHT-RATE JJ
freight-transport JJ NN
FREIGHT-TRANSPORT JJ NN
Freightways NNP NNPS
FREIGHTWAYS NNP NNPS
FREIND NNP
FREMANTLE NNP
FREMONT NNP
French-franc NN
FRENCH-FRANC NN
French-government-owned JJ
FRENCH-GOVERNMENT-OWNED JJ
french JJ
French JJ NNP NNPS NNS
FRENCH JJ NNP NNPS NNS
French-language JJ
FRENCH-LANGUAGE JJ
French-made JJ
FRENCH-MADE JJ
FRENCHMAN NNP
French-modeled JJ
FRENCH-MODELED JJ
French-speaking JJ
FRENCH-SPEAKING JJ
FRENETIC JJ
FRENZEL NNP
FRENZIED JJ
FRENZY NN NNP
Freon NN
FREON NN
FREQUENCIES NNS
FREQUENCY NN
FREQUENT-FLIER JJ
frequent JJ
Frequent JJ
FREQUENT JJ
Frequently RB
FREQUENTLY RB
frequents VBZ
FREQUENTS VBZ
FRERES NNP
FRESCA NNP
FRESCO NN
FRESENIUS NNP
FRESHBAKE NNP
fresh JJ
FRESH JJ
FRESHLY RB
Freshman NN
FRESHMAN NN
freshmen NNS
FRESHMEN NNS
freshness NN
FRESHNESS NN
FRESNO NNP
frets VBZ
FRETS VBZ
fretted VBD
FRETTED VBD
FRETTING VBG
fret VBP NN VB
FRET VBP VB NN
FREUDENBERGER NNP
FREUD NNP
FREUDTOY NNP
FREUND NNP
FREY NNP
FRIAR NN
FRICTION NN
FRICTIONS NNS
FRIDAY NNP
Fridays NNP NNS NNPS
FRIDAYS NNP NNS NNPS
Friday-the-13th JJ NN
FRIDAY-THE-13TH JJ NN
FRIDMAN NNP
fried JJ VBN
FRIEDMAN NNP
FRIED NNP JJ VBN
FRIEDRICH NNP
FRIEDRICHS NNP
friendlier JJR
FRIENDLIER JJR
friendliness NN
FRIENDLINESS NN
friendly JJ
FRIENDLY JJ NNP
FRIEND NN NNP
FRIEND-OF-THE-COURT JJ
FRIENDSHIP NN
FRIENDSHIPS NNS
Friends NNPS NNS
FRIENDS NNS NNPS
FRIERS NNS
FRIES NNP
FRIEZES NNS
FRIGATE NN
FRIGATES NNS
FRIGHTENED JJ VBD VBN
frightened JJ VBN VBD
frightening JJ
FRIGHTENING JJ
FRIGHTENINGLY RB
frighten VB
FRIGHTEN VB
FRIGHT NN
FRINGE-BENEFIT JJ
FRINGE NN
FRINGES NNS
FRI NNP
FRIPPERIES NNS
FRISBEE NNP
frittered VBN
FRITTERED VBN
FRITTERING VBG
FRIVOLOUS JJ
FROCKS NNS
FROG-7B NN
frogmen NNS
FROGMEN NNS
FROGS NNS
frolicked VBN
FROLICKED VBN
frolic VB
FROLIC VB
from IN
From IN
FROM IN
FROMSTEIN NNP
FRONDS NNS
frontal JJ
FRONTAL JJ
front-desk NN
FRONT-DESK NN
FRONTEND NN
Frontieres FW
FRONTIERES FW
FRONTIER NN NNP
FRONT-LOADED JJ
FRONT NN JJ NNP RB
front NN JJ RB
front-page JJ NN
FRONT-PAGE JJ NN
front-runner NN
FRONT-RUNNER NN
FRONT-RUNNING JJ
front-seat NN
FRONT-SEAT NN
FRONTS NNS
fro RB
FRO RB
FROSTED NNP
FROST NNP
frosty JJ
FROSTY JJ
froth NN VB
FROTH NN VB
frothy JJ
FROTHY JJ
frozen VBN JJ
FROZEN VBN JJ
froze VBD
FROZE VBD
FRUCHER NNP
FRUEHAUF NNP
FRUGALITY NN
frugal JJ
FRUGAL JJ
FRUITBOWL NN
FRUITFUL JJ
FRUITION NN
FRUITLESS JJ
FRUIT NN NNP
FRUITS NNS
frumpy JJ
FRUMPY JJ
frustrated VBN JJ VBD
FRUSTRATED VBN JJ VBD
frustrate VB
FRUSTRATE VB
frustrating JJ VBG
FRUSTRATING JJ VBG
FRUSTRATINGLY RB
FRUSTRATION NN
FRUSTRATIONS NNS
FRYAR NNP
FRYING VBG
FRY NN
F.S.B. NNP
F-series NNPS
F-SERIES NNPS
FSLIC NNP
FSX NNP
f SYM LS
F SYM NN NNP LS
FTC NNP
FT. NN
FT NNP
FT-SE NNP
fudge VB VBP
FUDGE VB VBP
fudging NN
FUDGING NN
FUDOSAN NNP
fuel-economy NN
FUEL-ECONOMY NN
fueled VBN VBD
FUELED VBN VBD
FUEL-EFFICIENT JJ
Fueling VBG
fueling VBG NN
FUELING VBG NN
FUEL-INJECTED JJ
Fuel NN
fuel NN VB
FUEL NN VB
fuel-services NNS
FUEL-SERVICES NNS
FUELS NNS
fuel-storage NN
FUEL-STORAGE NN
FUENTES NNP
FUGITIVES NNS
Fuji-apple JJ
FUJI-APPLE JJ
Fuji NNP NNS
FUJI NNP NNS
FUJISAWA NNP
Fujis NNPS
FUJIS NNPS
FUJITSU NNP
FUKUYAMA NNP
FULBRIGHT NNP
fulfilled VBN VBD
FULFILLED VBN VBD
FULFILLING VBG
FULFILLMENT NN
fulfills VBZ
FULFILLS VBZ
fulfill VB VBP
FULFILL VB VBP
FULFILMENT NN
FULHAM NNP
FULL-BLOWN JJ
FULL-BODIED JJ
FULL-BODY JJ
fuller JJR
FULLER NNP JJR
FULLERTON NNP
fullest JJS
FULLEST JJS
FULL-FLEDGED JJ
full JJ RB
FULL JJ RB
FULL-LENGTH JJ
FULL-PAGE JJ
FULL-POWER JJ
FULL-RANGE JJ
fullscale JJ
FULL-SCALE JJ
FULLSCALE JJ
FULL-SIZED JJ
FULL-SIZE JJ
Full-time JJ
full-time JJ RB
FULL-TIME JJ RB
FULLY-DILUTED JJ
FULL-YEAR JJ
Fully RB
FULLY RB
FULMINATIONS NNS
FULTON NNP
FULTZ NNP
FUME-FILLED JJ
fumes NNS VBZ
FUMES NNS VBZ
FUMING VBG
fumpered VBD
FUMPERED VBD
functional JJ
FUNCTIONAL JJ
FUNCTIONARIES NNS
functioned VBD
FUNCTIONED VBD
functioning VBG NN
FUNCTIONING VBG NN
function NN VBP VB
FUNCTION NN VBP VB
FUNCTIONS NNS
FUNDAMANTALIST NN
fundamantal JJ
FUNDAMANTAL JJ
FUNDAMENTALISM NN
fundamentalist JJ
FUNDAMENTALIST JJ
Fundamentalists NNPS
FUNDAMENTALISTS NNS NNPS
fundamental JJ
Fundamental JJ NNP
FUNDAMENTAL JJ NNP
Fundamentally RB
FUNDAMENTALLY RB
FUNDAMENTALS NNS
Funded VBN
funded VBN JJ VBD
FUNDED VBN JJ VBD
FUNDING NN NNP VBG
funding NN VBG
FUND NN NNP VB VBP
Fund NNP NN
fund NN VB VBP
fund-raiser NN
FUND-RAISER NN
fund-raisers NNS
Fund-Raisers NNS
FUND-RAISERS NNS
FUNDRAISERS NNS
fund-raising JJ NN
FUND-RAISING NN JJ
fundraising VBG NN
FUNDRAISING VBG NN
FUND-RESEARCH JJ
Funds NNS NNPS NNP
FUNDS NNS NNPS NNP
FUNDS NNS NNPS NNP VBZ
funds NNS VBZ
FUNDS-SERVICE JJ
FUNDTRUST NNP
funeral JJ NN
FUNERAL NN JJ
fungi NNS
FUNGI NNS
FUNG NNP
fungus NN
FUNGUS NN
funky JJ
FUNKY JJ
FUN-LOVING JJ
FUNN-EEEE JJ
funneled VBN VBD
FUNNELED VBN VBD
FUNNELING VBG
funnel VB
FUNNEL VB
FUNN-IH JJ
FUN NN
funny JJ
Funny JJ NNP
FUNNY JJ NNP
FUQUA NNP
FUR-AND-LEATHER JJ
FUREY NNP
FURILLO NNP
FURIOUS JJ
FURIOUSLY RB
FURLETT NNP
furloughed VBN
FURLOUGHED VBN
FURLOUGHS NNS
FUR-MAKING JJ
FURMAN NNP
Furnace NN
FURNACE NN
FURNACES NNS
furnished VBN JJ
FURNISHED VBN JJ
FURNISHINGS NNS
FURNISHING VBG
furnish VB
FURNISH VB
FURNITURE NN NNP
FUR NN NNP
FUROR NN
FURRIER NN
FURRIERS NNS
furrows VBZ
FURROWS VBZ
FURS NNS NNP
FURTHERING VBG
FURTHER JJ RB RBR JJR VB
further JJ RBR RB JJR VB
furthermore RB
Furthermore RB
FURTHERMORE RB
Further RB JJ RBR
furthers VBZ
FURTHERS VBZ
FURUKAWA NNP
FURUTA NNP
Fury NN
FURY NN
FUSE NN
FUSILLADE NN
fusing NN
FUSING NN
FUSION NN
fusses VBZ
FUSSES VBZ
futile JJ
FUTILE JJ
FUTILITY NN
future JJ NN
FUTURE JJ NN NNP
Future NNP JJ
futures-exchange NN
FUTURES-EXCHANGE NN
FUTURES-INVESTMENT JJ
FUTURES NNS
Futures NNS NNPS NNP
FUTURES NNS NNPS NNP
Futures-related JJ
FUTURES-RELATED JJ
FUTURES-TRADING JJ
FUTURISTIC JJ
fuzzier JJR
FUZZIER JJR
fuzzy JJ
FUZZY JJ
F.W. NNP
FXTV NNP
G-2 NN
G-7 NNP NN CD
GABELE NNP
GABELLI NNP
GABE NNP
GABOR NNP
GABRIELA NNP
GABRIELE NNP
GABRIEL NNP
GADGET NN
GADGETS NNS
GADHAFI NNP
GADSDEN NNP
GAECHINGER NNP
Gaelic JJ
GAELIC JJ
GAFFNEY NNP
GAF NNP
gagged VBN
GAGGED VBN
gained VBD VBN VB
GAINED VBD VBN VB
GAINEN NNP
GAINER NN
Gainers NNS
GAINERS NNS
GAINES NNP
GAINING VBG NNP
Gain NN NNP
gain NN VB VBP
GAIN NN VB VBP NNP
Gains NNS
gains NNS VBZ
GAINS NNS VBZ
GAINS-TAX JJ
GAISMAN NNP
GAITHERSBURG NNP
GAJA NNP
GALAMIAN NNP
GALA NN NNP
GALANTER NNP
GALAXIES NNS
GALAX NNP
GALBANI NNP
GALBRAITH NNP
GALE NNP
GALICIA NNP
GALILEO NNP
GALIPAULT NNP
GALLAGHER NNP
gallant JJ
GALLANT JJ
gall-bladder NN
GALL-BLADDER NN
GALLEN NNP
GALLE NNP
GALLERIES NNS
GALLERY NN NNP
Gallery NNP NN
GALLES NNP
galling JJ
GALLING JJ
GALLITZIN NNP
GALLIUM NN
GALL NN
GALLON NN
GALLONS NNS
GALLOPING VBG
GALLOWAY NNP
GALLSTONE NN
GALLSTONES NNS
Gallup NNP NN
GALLUP NNP NN
GALOOB NNP
GALSWORTHY NNP
galvanized JJ VBD
GALVANIZED JJ VBD
galvanize VB
GALVANIZE VB
GALVANIZING VBG
GALVESTON-HOUSTON NNP
GAMBIT NN NNP
GAMBLE NNP NN VB
gamble NN VB
GAMBLER NN
GAMBLERS NNS
gambling NN VBG
GAMBLING NN VBG
GAME NN NNP
Game NNP NN
game-show NN
GAME-SHOW NN
Games NNPS NNP
GAMES NNS NNPS NNP
GAMETOCIDE NN
gaming NN
Gaming NN
GAMING NN
GAMMA NN
GAMUT NN
GANDHI NNP
GANES NNP
GANGBUSTERS NNS
GANGLION NN
Gang NN
GANG NN
GANGS NNS
GANGSTERS NNS
GANIS NNP
GANNETT NNP
GANN NNP
GA NNP
GA. NNP
GANT NNP
GAO NNP
gaped VBN
GAPED VBN
gaping JJ
GAPING JJ
GAP NN NNP
GARAGE NN
GARAGES NNS
GARANTI NNP
GARBAGE-DISPOSAL JJ
garbage-incinerator NN
GARBAGE-INCINERATOR NN
GARBAGE NN NNP
GARBER NNP
GARCIA NNP
Garcias NNPS
GARCIAS NNPS
GARDENER NN
GARDENERS NNS
GARDENETTES NNS
gardening NN VBG
GARDENING NN VBG
GARDEN NN NNP VB
garden NN VB
garden-shrub NN
GARDEN-SHRUB NN
Gardens NNPS NNP
GARDENS NNPS NNP NNS
garden-variety NN
GARDEN-VARIETY NN
GARDINER NNP
GARDNER NNP
GARFIELD NNP
GARGAN NNP
gargantuan JJ
Gargantuan JJ
GARGANTUAN JJ
Garish JJ
GARISH JJ
GARLAND NNP
GARMAN NNP
GARMENT NN NNP
GARMENTS NNS
garnered VBD VBN
GARNERED VBD VBN
garner VB VBP
GARNER VB VBP NNP
GARNETT NNP
GARN NNP
Garpian JJ
GARPIAN JJ
GARRATT NNP
GARRET NNP
GARRETT NNP
GARRICK-AUG NNP
GARRISON NNP NN
GARRY NNP
GARTH NNP
Gartner NNP JJR
GARTNER NNP JJR
GARY NNP
GARZA NNP
GARZARELLI NNP
GASB NNP
GAS-DERIVED JJ
GASEOUS JJ
Gases NNS
GASES NNS
GAS-FIRED JJ
gas-gathering JJ VBG
GAS-GATHERING JJ VBG
GAS-GUZZLING JJ
GASICH NNP
GASKIN NNP
gas NN
GAS NN NNP
Gas NNP NN
Gasoline NN
GASOLINE NN
GASOLINES NNS
gasped VBD
GASPED VBD
gas-producing NN
GAS-PRODUCING NN
gasp VB
GASP VB
GAS-STATION JJ
GAS-TAX-INCREASING JJ
gas-tax NN
GAS-TAX NN
GASTON NNP
GASTRO-INTESTINAL JJ
GAS-TURBINE JJ
GATE NN NNP
Gate NNP NN
GATES NNP NNS
GATES-WARREN NNP
GATEWAY NN
gathered VBD VBN
GATHERED VBD VBN
Gathered VBN
gathering NN VBG
GATHERING NN VBG
GATHERINGS NNS
gathers VBZ
GATHERS VBZ
gather VB VBP
GATHER VB VBP
GATOIL NNP
GATOS NNP
GATSBY NNP
GATT NNP
GATWARD NNP
GAUBERT NNP
gauges VBZ
GAUGES VBZ
gauge VB NN
GAUGE VB NN
GAUGING VBG
GAUGUIN NNP
GAULLE NNP
Gauloises NNP NNPS
GAULOISES NNP NNPS
GAUZE NN
gave VBD
Gave VBD
GAVE VBD
gawky JJ
GAWKY JJ
gay JJ
GAY JJ
GAYLE NNP
GAYLORD NNP
GAZA NNP
GAZETA NNP
GAZETTE NNP
gaze VBP
GAZE VBP
GDL NNP
G.D. NNP
GDP NNP
GDR NNP
geared VBN
GEARED VBN
GEARING VBG
GEAR NN NNP VB VBP
gear NN VBP VB
gears VBZ
GEARS VBZ
GEARY NNP
GEBHARD NNP
GEBRUEDER NNP
GEC NNP
GEDULD NNP
Geeks NNPS NNS
GEEKS NNS NNPS
GEFFEN NNP
GEHL NNP
GEIER NNP
GEIGER NNP
GELATIN NN
GELBART NNP
GELLERT NNP
GELLES NNP
GELL NNP
GELMAN NNP
GEMINA NNP
GEM NN
gemsbok NNS
GEMSBOK NNS
GEMS NNS
GEMSTONE NN
GENCORP NNP
GENDARME NN
gender NN VB
GENDER NN VB
GENE-COPYING JJ
GENEL NNP
GENE NN NNP
Genentech NNP NN
GENENTECH NNP NN
general-director NN
GENERAL-DIRECTOR NN
general-election JJ NN
GENERAL-ELECTION NN JJ
GENERALE NNP
GENERALES NNP
GENERALI NNP
general-insurance NN
GENERAL-INSURANCE NN
GENERAL-INTEREST JJ
GENERALIST NN
GENERALISTS NNS
Generalizations NNS
GENERALIZATIONS NNS
GENERALIZED JJ NNP
generalize VB
GENERALIZE VB
general JJ NN
GENERAL JJ NNP NN
Generally RB
GENERALLY RB
General NNP JJ
GENERAL-PRACTICE JJ
general-practitioner NN
GENERAL-PRACTITIONER NN
generalpurpose JJ
GENERAL-PURPOSE JJ
GENERALPURPOSE JJ
generated VBN VBD
GENERATED VBN VBD
generates VBZ
GENERATES VBZ
generate VB VBP
GENERATE VB VBP
generating NN VBG
GENERATING NN VBG NNP
GENERATION NN NNP
GENERATION-SKIPPING JJ
GENERATIONS NNS
GENERATOR NN
GENERATORS NNS
GENERICALLY RB
generic-drug NN JJ
GENERIC-DRUG NN JJ
GENERIC JJ
GENEROUS JJ
GENEROUSLY RB
genesis NN
GENESIS NN
GENES NNS
Gene-Spliced JJ
GENE-SPLICED JJ
gene-splicing NN
Gene-splicing NN
GENE-SPLICING NN
GENETICALLY RB
GENETICIST NN
GENETIC JJ NNP
Genetic NNP JJ
GENETICS NNP
Geneva-based JJ
GENEVA-BASED JJ
GENEVA NNP
genial JJ
GENIAL JJ
GENIE NN NNP
genital JJ
GENITAL JJ
genius NN
Genius NN
GENIUS NN
GEN. NNP
GE NNP
Genocide NN
GENOCIDE NN
GENO NNP
GENOVA NNP
GenProbe NN
GENPROBE NN
GEN-PROBE NNP
GENRE NN
GENRES NNS
GENSCHER NNP
genteel JJ
GENTEEL JJ
gentile JJ
GENTILE JJ
Gentility NN
GENTILITY NN
gentle JJ
GENTLE JJ
GENTLELADIES NNS
GENTLELADY NN
gentlemen NNS
GENTLEMEN NNS
gentleness NN
GENTLENESS NN
gentler JJR
GENTLER JJR
GENTLY RB
GENTRY NN
genuine JJ
GENUINE JJ
GENUINELY RB
GEOCRYOLOGY NNP
GEODE NN
GEODETIC NNP
GEOFFREY NNP
GEOFFRIE NNP
GEOFFRION NNP
GEOGRAPHICAL JJ
GEOGRAPHIC NNP JJ
GEOGRAPHY NN
GEOLOGICALLY RB
GEOLOGY NN
GEOMETRICAL JJ
GEOMETRIC JJ
GEOMETRY NN
GEO NNP
GEORGE NNP
GEORGESCU NNP
GEORGESON NNP
GEORGETOWN NNP
GEORGETTE NNP
Georgian JJ
GEORGIAN JJ
GEORGIA NNP
GEORGIA-PACIFIC NNP
GEORG NNP
GEOSCIENCES NNS
GEPHARDT NNP
GERALD NNP
GERALDO NNP
GERARD NNP
GERARDO NNP
GERD NNP
GERHARD NNP
GERMAIN NNP
German-born JJ
GERMAN-BORN JJ
German-built JJ
GERMAN-BUILT JJ
German JJ NNP
GERMAN JJ NNP
German-made JJ
GERMAN-MADE JJ
Germans NNPS NNS NNP
GERMANS NNPS NNS NNP
GERMANS NNS
Germany-based JJ
GERMANY-BASED JJ
GERMANY NNP
GERMANY'S NNP
GERMETEN NNP
GERMONT NNP
GERMS NNS
GERO NNP
GERRARD NNP
gerrymandering NN
GERRYMANDERING NN
GERRY NNP
GERSONY NNP
GERSTNER NNP
gestational JJ
GESTATIONAL JJ
GESTE NNP
gestured VBD
GESTURED VBD
GESTURE NN
GESTURES NNS
GETHSEMANE NNP
GET-OUT-THE-VOTE JJ
GET-RICH-QUICK JJ
gets VBZ
Gets VBZ
GETS VBZ
Getting VBG
GETTING VBG
get-together NN
GET-TOGETHER NN
get-togethers NNS
GET-TOGETHERS NNS
GETTY NNP
GETTYSBURG NNP
GET VB
get VB VBP
Get VB VBP
GET VB VBP
GEVA NNP
GEVERGEYEVA NNP
GEVERGEYEV NNP
GEYSERS NNS
GEZA NNP
Ghanaian JJ
GHANAIAN JJ
GHANA NNP
ghastly JJ
GHASTLY JJ
GHAZEL NNP
GHETTOS NNS
GHKM NNP
Ghostbusters NNP NNS
GHOSTBUSTERS NNS NNP
ghost-busting NN
ghostbusting NN
GHOST-BUSTING NN
GHOSTBUSTING NN
ghostly JJ
GHOSTLY JJ
Ghost NN
GHOST NN
GHOSTS NNS
GHS NNP
GIAMATTI NNP
GIANCARLO NNP
giant NN JJ
GIANT NN JJ NNP
Giant NNP JJ NN
Giants NNP NNPS NNS
GIANTS NNS NNP NNPS
GIBBERISH NN
GIBBONS NNP
GIBRALTAR NNP
GIBSON NNP
GIDDINGS NNP
giddy JJ
GIDDY JJ
GIDEON NNP
GIFFEN NNP
GIFFORD NNP
GIFTED JJ
gift-giving NN
GIFT-GIVING NN
GIFT NN
GIFTS NNS
GIGANTIC JJ
GIGGLE NN
GIG NN
GIGOLO NN
GIGUE-LIKE JJ
GIGUIERE NNP
GILBERT NNP
GILBRALTAR NNP
GILCHRIST NNP
GILDA NNP
GILDED JJ
GILDER NNP
gilding NN
GILDING NN
GILES NNP
GILGORE NNP
GILLELAND NNP
GILLERS NNP
GILLES NNP
GILLESPIE NNP
GILLETTE NNP
GILLETT NNP
GILLIAN NNP
GILL NNP
GILMARTIN NNP
GILMORE NNP
GIL NNP
gilt JJ NN NN|JJ
GILT NN|JJ NN JJ
Gilts NNS
GILTS NNS
GIMENEZ NNP
GIMMICK NN
GIMMICK-RIDDEN JJ
GIMMICKRY NN
GIMMICKS NNS
Gingerly RB
GINGERLY RB
GINGER NN
GINGL NNP
GINGRICH NNP
GINNIE NNP
GIN NN
GINN NNP
GI NNP
GINSBERG NNP
GINSENG NN
GINTEL NNP
GIOCONDA NNP
GIOLITO NNP
GIORGIO NNP
GIOVANNI NNP
GIRAFFE NNP
GIRAUD NNP
girded VBD
GIRDED VBD
GIRDER NN
GIRDING VBG
GIRLFRIEND NN
GIRL NN NNP
GIRLS NNS
GIROLDI NNP
GIROUX NNP
GIROZENTRALE NNP
GIST NN
GITANES NNP
GITANO NNP
GITTER NNP
GIULIANI NNP
GIULIO NNP
GIVAUDAN NNP
giveaway NN JJ
GIVEAWAY NN JJ
Giveaways NNS
GIVEAWAYS NNS
GIVEBACKS NNS
GIVENS NNP
Given VBN
given VBN JJ
GIVEN VBN JJ
gives VBZ
Gives VBZ
GIVES VBZ
giveth VBZ
GIVETH VBZ
Give VB
GIVE VBP
give VB VBP
GIVE VB VBP
Giving VBG
giving VBG NN
GIVING VBG NN
GIZMO NN
GIZMOS NNS
glacial JJ
GLACIAL JJ
GLACIER NNP
GLACIOLOGY NNP
GLADE NN
glad JJ
GLAD JJ
glamorized VBN
GLAMORIZED VBN
glamorize VB
GLAMORIZE VB
Glamorous JJ
GLAMOROUS JJ
GLAMOUR NN
glanced VBD
GLANCED VBD
GLANCE NN
GLARE NN
glares VBZ
GLARES VBZ
glaring JJ
GLARING JJ
GLARINGLY RB
GLARIS NNP
GLASER NNP
GLASGOW NNP
Glasnost FW
glasnost FW NN
GLASNOST FW NN
GLASS-CONTAINER JJ
GLASSES NNS
GLASS-MAKING JJ NN
glass-making NN JJ
glass NN
GLASS NN NNP
Glass NNP NN
GLASS-STREWN JJ
GLASSWORK NNP
GLASSWORKS NNP
GLAUBER NNP
GLAXO NNP
GLAZER NNP
glaze VBP VB
GLAZE VB VBP
GLAZIER NNP
GLEAMING VBG
gleaned VBN
GLEANED VBN
glean VB
GLEAN VB
GLEEFUL JJ
GLEEFULLY RB
GLEE NN
GLENDALE NNP
GLENHAM NNP
GLENNE NNP
GLENN NNP
GLEN NNP
GLENVIEW NNP
glib JJ
GLIB JJ
glide VB
GLIDE VB
GLIDING VBG
GLIEDMAN NNP
GLIMMER NN
GLIMPSE NN
GLIMPSES NNS
GLINT NN
GLITCHES NNS
GLITCH NN
glitterati NNS
GLITTERATI NNS
GLITTER NN
GLITTERY NN
GLITZ NN
glitzy JJ NN
GLITZY JJ NN
G.L. NNP
gloated VBD
GLOATED VBD
GLOATERS NNS
GLOATING VBG
gloats VBZ
GLOATS VBZ
gloat VB
GLOAT VB
GLOBAL-FUNDS JJ
GLOBALISM NN
GLOBALIST NN
GLOBALISTS NNS
GLOBALIZATION NN
global JJ
GLOBAL JJ NNP
GLOBALLY RB
global-news NN
GLOBAL-NEWS NN
Global NNP JJ
GLOBE NNP NN
GLOBEX NNP
GLOBO NNP
GLOBULIN NN
gloomier JJR RBR
GLOOMIER RBR JJR
GLOOM NN
gloomy JJ
GLOOMY JJ
GLOP NN
GLORIA NNP
GLORIOSO NNP
GLORIOUS JJ
GLORY NN NNP
Glory NNP NN
gloss VBP VB
GLOSS VB VBP
glossy JJ
Glossy JJ
GLOSSY JJ
GLOUCESTER NNP
GLOVE NN NNP
GLOVES NNS
glowed VBD
GLOWED VBD
glowing JJ VBG
GLOWING JJ VBG
GLOW NN
GLUCK NNP
GLUCKSMAN NNP
GLUCOSE NN
glued VBN
GLUED VBN
GLUE NN
GLUES NNS
glum JJ
GLUM JJ
glut NN VB
GLUT NN VB
GLUTS NNS
glutted JJ VBN
GLUTTED JJ VBN
GLYCOLS NNS
GM-10 NN
GMAC NNP
G.M.B.H. NNP
G.M.B NNP
GMC NNP
GM-Jaguar JJ
GM-JAGUAR JJ
GM NNP
GM-Toyota JJ
GM-TOYOTA JJ
gnawing NN
GNAWING NN
gnaw VB
GNAW VB
G. NNP
G NNP SYM
GNP NNP NN
GNU-EMACS NNP
go-ahead NN
GO-AHEAD NN
GOAL NN
GOALS NNS
go-around NN
GO-AROUND NN
GOATEE NN
GOATS NNS
gobbled VBN
GOBBLED VBN
GOBBLEDYGOOK NN
GOBBLING VBG
GOBLINS NNS
goddess NN
GODDESS NN
GODIVA NNP
GOD NNP
GODOWN NNP
Gods NNS
GODS NNS
GODUNOV NNP
goes VBZ
Goes VBZ NNP
GOES VBZ NNP
GOGH NNP
GO-GO JJ
GOGOL NNP
goings-on NNS
GOINGS-ON NNS
Going VBG
going VBG JJ NN
GOING VBG NN JJ
GO-IT-ALONE JJ
GOLAR NNP
goldbanded VBN
GOLDBANDED VBN
GOLD-BASED JJ
GOLDBERG NNP
golden JJ
Golden NNP JJ
GOLDEN NNP JJ
GOLDFEIN NNP
GOLDINGER NNP
GOLDIN NNP
gold-leaf JJ NN
GOLD-LEAF NN JJ
GOLDMAN NNP
GOLD-MINING JJ NN
gold-mining NN JJ
gold NN JJ
GOLD NN JJ NNP
Gold NNP NN
Gold-oriented JJ
GOLD-ORIENTED JJ
GOLDSCHEIDER NNP
GOLDSCHMIDT NNP
GOLDSMITH NNP
GOLDS NNS
GOLDSTAR NNP
GOLDSTEIN NNP
GOLDSTON NNP
GOLDWATER NNP
GOLENBOCK NNP
GOLFERS NNS
golfing NN
GOLFING NN
GOLF NN
GOLF NN NNP
GOLFS NNS
GOLIATH NNP
GOLIATHS NNPS NNS
Goliaths NNS NNPS
GOLLICH NNP
GOLLUST NNP
GOLOMB NNP
GOLOVEN NNP
GOMEL NNP
GOMEZ NNP
GONCHAROV NNP
Gone VBN
gone VBN VBN|JJ
GONE VBN VBN|JJ
G.O. NNP
gon VBG VB
GON VBG VB
GONZALEZ NNP
Good-bye NN
GOOD-BYE NN
GOODBYE NNP UH
goodbye UH
GOODE NNP
good-faith NN
GOOD-FAITH NN
GOODFELLOW NNP
GOODFRIEND NNP
GOOD-HEARTED JJ
GOOD-HUMORED JJ
GOODIES NNS
Good JJ NNP
good JJ NN RB
GOOD JJ NN RB NNP
GOOD-LOOKING JJ
GOODMAN NNP
GOOD-NATURED JJ
goodness NN
GOODNESS NN
GOOD-QUALITY JJ
GOODRICH NNP
GOODS NNS NNP
GOODSON NNP
GOODS-PRODUCING JJ
GOOD-TIL-CANCELED JJ
GOOD-TILL-CANCELED JJ
GOOD-WILL JJ NN
good-will NN JJ
GOODWILL NNP NN
Goodwills NNPS
GOODWILLS NNPS
GOODWIN NNP
Goodyear NNP VBP
GOODYEAR NNP VBP
GOODY NNP
GOOSEBERRY NN
GOOSE NN
goosey JJ
GOOSEY JJ
GOP NNP
GORBACHEV NNP
GORBY NNP
GORCE NNP
GORDON NNP
GORDON\/PICK NNP
gored VBN
GORED VBN
GORENSTEIN NNP
gore VB
GORE VB NNP
GORGEOUS JJ
GORILLA NN NNP
GORILLAS NNP NNS
GORIOT NNP
GORKY NNP
GORMAN NNP
GORTARI NNP
GOSBANK NNP
GOSHEN NNP
GOSPEL NN
GOSPLAN NNP
GOSSIPING VBG
GOSSIP NN
gossipy JJ
GOSSIPY JJ
GOSSNAB NNP
GOTAAS-LARSEN NNP
GOTLIEB NNP
Got NNP VBD
GOTSHAL NNP
GOTTA NNP
gotten VBN
GOTTEN VBN
GOTTESFELD NNP
GOTTESMAN NNP
GOTTLIEB NNP
GOTTSCHALK NNP
got VBD VBN VBP VB
GOT VBD VBN VBP VB NNP
gouging NN
GOUGING NN
GOULD NNP
Gouldoid JJ
GOULDOID JJ
GOUPIL NNP
GOURLAY NNP
GOURMET NN
gouty JJ
GOUTY JJ
Go VB NNP
go VB VBP NN
GO VB VBP NN NNP
GOVERMENT NN
GOVERNANCE NN
governed VBN VBD
GOVERNED VBN VBD
GOVERNER NNP
governing VBG NN
GOVERNING VBG NN
GOVERNMEMT NN
governmental-affairs JJ NNS
GOVERNMENTAL-AFFAIRS JJ NNS
governmental JJ
GOVERNMENTAL JJ NNP
GOVERNMENT-APPOINTED JJ
GOVERNMENT-APPROVED JJ
GOVERNMENT-ASSISTED JJ
GOVERNMENT-BACKED JJ
government-bond NN
GOVERNMENT-BOND NN
government-business NN
GOVERNMENT-BUSINESS NN
GOVERNMENT-CERTIFIED JJ
GOVERNMENT-CONTROLLED JJ
GOVERNMENT-FUNDED JJ
GOVERNMENT-GUARANTEED JJ
GOVERNMENT-HELD JJ
GOVERNMENT-IMPOSED JJ
GOVERNMENT-INSURED JJ
GOVERNMENT-MANDATED JJ
GOVERNMENT NN NNP
Government NNP NN
GOVERNMENT-OPERATED JJ
GOVERNMENT-OWNED JJ
GOVERNMENT-PLUS JJ
government-relations NNS
GOVERNMENT-RELATIONS NNS
GOVERNMENT-RUN JJ
government-securities NNS
GOVERNMENT-SECURITIES NNS
government-set VBN
governmentset VBN
GOVERNMENT-SET VBN
GOVERNMENTSET VBN
Governments NNS
GOVERNMENTS NNS
GOVERNMENT-SPONSORED JJ NNP
GOVERNMENT-SUBSIDIZED JJ
governor-elect NN
GOVERNOR-ELECT NN
GOVERNOR NN NNP
GOVERNORSHIP NN
Governors NNS NNP
GOVERNORS NNS NNP
Govern VB
govern VB VBP
GOVERN VB VBP
GOVETTE NNP
GOVETT NNP
GOV. NNP
GOYA NNP
GPA NNP
GP NNP
GR8FLRED NNP CD
grabbed VBD VBN
GRABBED VBD VBN
GRABBING VBG
GRABE NNP
GRABOWIEC NNP
GRABS NNS
grab VB NN VBP
GRAB VB NN VBP NNP
GRACEFUL JJ
GRACEFULLY RB
Grace NNP NN
GRACE NNP NN VB
grace NN VB
GRACE-SIERRA NNP
GRACIOUS JJ
GRACIOUSLY RB
GRADE NN NNP
GRADER NN
GRADERS NNS
GRADES NNS
GRADISON NNP
GRADMANN NNP
Grads NNS
GRADS NNS
gradual JJ
GRADUAL JJ
Gradually RB
GRADUALLY RB
graduated VBD VBN
GRADUATED VBD VBN
graduate NN JJ
Graduate NNP NN
GRADUATE NNP NN JJ
Graduates NNS
graduates NNS VBZ
GRADUATES NNS VBZ
graduate-student NN
Graduate-student NN
GRADUATE-STUDENT NN
GRADUATION NN
GRADY NNP
GRAEDEL NNP
GRAEME NNP
grafted VBN
GRAFTED VBN
GRAFT NN
GRAFT-RIDDLED JJ
GRAHAM NNP
Grahams NNPS
GRAHAMS NNPS
GRAIL NNP
Grain NN NNP
GRAIN NN NNP
Grains NNS
GRAINS NNS NNPS
GRAIS NNP
GRAMMAR NN
grammar-school NN
GRAMMAR-SCHOOL NN
GRAMMATICAL JJ
GRAMM NNP
GRAMM-RUDMAN-HOLLINGS NNP
GRAMM-RUDMAN NNP
Grammys NNS
GRAMMYS NNS
GRAM NN
GRAMS NNS
GRANADA NNP
grandchildren NNS
GRANDCHILDREN NNS
GRANDEES NNS
grander JJR
GRANDER JJR
GRANDEUR NN
GRANDFATHER NN
grandiose JJ
GRANDIOSE JJ
grand JJ
grand-jury JJ NN
GRAND-JURY JJ NN
GRANDKIDS NNS
GRANDLY RB
GRANDMASTERS NNS
grandmotherly JJ
GRANDMOTHERLY JJ
GRANDMOTHER NN
GRANDMOTHERS NNS
GRAND NNP JJ
GRANDPARENT NNP
GRANDPARENTS NNS
grand-prize NN
GRAND-PRIZE NN
GRANDSIRE NNP
GRANDSON NN
GRANDSTANDER NN
GRANGE NNP
Granges NNP NNS
GRANGES NNP NNS
GRANITE NN
Grannies NNPS
GRANNIES NNPS
GRANNON NNP
GRANNY NNP
GRANO NNP
granted VBN VBD JJ
GRANTED VBN VBD JJ
GRANTING VBG
GRANTOR NNP
Grants NNPS
GRANTS NNS NNPS VBZ
grants NNS VBZ
GRANT VB NN NNP VBP
grant VB NN VBP
granular JJ
GRANULAR JJ
GRANVILLE NNP
Grapes NNS
GRAPES NNS
GRAPEVINE NN
GRAPHIC JJ NNP
Graphics NNP NNPS NNS
GRAPHICS NNS NNP NNPS
GRAPHITE NN
GRAPHITE-PLASTIC JJ
GRAPH NN
GRAPHS NNS
grappled VBD
GRAPPLED VBD
grapples VBZ
GRAPPLES VBZ
grapple VB
GRAPPLE VB
GRAS NNP
GRASPING VBG
grasp VB NN VBP
GRASP VB NN VBP
GRASSLEY NNP
grass NN
GRASS NN
GRASSO NNP
GRASS-ROOTS JJ
GRASSROOTS NNS
grassy JJ
GRASSY JJ
GRATEFUL JJ NNP
GRATIFICATION NN
GRATIFIED JJ
GRATITUDE NN
GRATUITIES NNS
GRATUITOUS JJ
GRATUITOUSLY RB
GRATUITY NN
GRAUER NNP
grave JJ NN
GRAVE JJ NN
GRAVEL-CHEWING JJ
GRAVELLE NNP
GRAVELY RB
GRAVES NNP
gravest JJS
GRAVEST JJS
GRAVEYARD NN
gravitational JJ
GRAVITATIONAL JJ
GRAVITY NN
GRAVY NN
GRAY-BEARD JJ
gray-flannel NN
GRAY-FLANNEL NN
GRAYHOUND NNP
graying VBG NN
GRAYING VBG NN
gray JJ
GRAY-MARKET JJ
GRAY NNP JJ
GRAYSON NNP
grazed VBD
GRAZED VBD
GRAZERS NNS
graze VBP
GRAZE VBP
grazing NN
GRAZING NN
GREANEY NNP
Grease NN
GREASE NN
greater-fool JJR
GREATER-FOOL JJR
greater JJR
GREATER JJR NNP
greatest JJS
GREATEST JJS
great-grandchildren NNS
GREAT-GRANDCHILDREN NNS
great-grandfather NN
GREAT-GRANDFATHER NN
GREAT JJ NNP
GREAT JJ NNP RB
great JJ RB
GREATLY RB
greatness NN
GREATNESS NN
Great NNP JJ
GREATS NNS
GREECE NNP
greedier JJR
GREEDIER JJR
Greedily RB
GREEDILY RB
greed NN
GREED NN NNP
greedy JJ
GREEDY JJ
Greek JJ NNP
GREEK JJ NNP
Greeks NNPS
GREEKS NNPS
GREENBACK NN NNP
GREENBERG NNP
GREENE NNP
greener JJR
GREENER JJR
GREENERY NNP
GREENFIELD NNP NN
GREENHILL NNP
GREENHOUSE-EFFECT JJ
GREENHOUSE NN
GREENHOUSE-PRODUCED JJ
GREENHOUSES NNS
GREENIAUS NNP
greening NN
GREENING NN
greenish JJ
GREENISH JJ
green JJ NN
GREENLAND NNP
GREENMAILER NN
GREENMAIL NN
GREEN NNP JJ NN
Green NNP NN
GREENSBORO NNP
GREENSHIELDS NNP
Greens NNP NNS
GREENS NNP NNS
GREENSPAN NNP
GREENSPON NNP
GREENVILLE NNP
GREENWALD NNP
GREENWICH NNP
GREENWOOD NNP
GREER NNP
greeted VBN VBD
GREETED VBN VBD
Greetings NNP NNS
GREETINGS NNP NNS
greeting VBG NN
GREETING VBG NN
greets VBZ
GREETS VBZ
greet VB
GREET VB
GREGG NNP
GREG NNP
GREGOIRE NNP
GREGORY NNP
GREIF NNP
GREIFSWALD NNP
GREINER NNP
GRENADA NNP
GRENADES NNS
GRENFELL NNP
GRENIER NNP
GRE NNP
GRESSETTE NNP
GREVE NNP
GREW VBD
grew VBD VBN
GREW VBD VBN
grey JJ NN
GREY NNP
GRGICH NNP
GRIDDED JJ
GRIDIRON NN
gridlocked JJ VBN
GRIDLOCKED JJ VBN
GRIDLOCK NN
GRID NN NNP
GRIECO NNP
GRIEF NN
GRIESA NNP
GRIEVANCE NN
GRIEVANCES NNS NNP
GRIEVOUS JJ
GRIFFIN NNP
GRIFFITH-JOYNER NNP
GRIFFITH NNP
GRIGOLI NNP
GRIGSBY NNP
GRILLED-CHICKEN JJ
GRILLED JJ
grill VBP
GRILL VBP NNP
grimaced VBD
GRIMACED VBD
GRIMACES NNS
grimace VB
GRIMACE VB
GRIMES NNP
grim JJ
GRIM JJ
GRIMLY RB
grimmest JJS
GRIMMEST JJS
Grimm NNP NN
GRIMM NNP NN
grimness NN
GRIMNESS NN
GRINDERS NNS
GRINDING VBG
grinds VBZ
GRINDS VBZ
grind VB
GRIND VB
GRINEVSKY NNP
GRINGO NNP
GRINGOS NNS
Grinned VBD
GRINNED VBD
GRINNING VBG
GRINS NNS
gripes NNS VBZ
GRIPES NNS VBZ
GRIP NN
gripped VBD
GRIPPED VBD
gripping JJ VBG
GRIPPING JJ VBG
GRIPPO NNP
GRIPS NNS
GRISEBACH NNP
GRISHAW-MUELLER NNP
grisly JJ
GRISLY JJ
GRISWOLD NNP
gritty JJ
GRITTY JJ
groans VBZ
GROANS VBZ
GROBSTEIN NNP
GROCERIES NNS
GROCERY NN NNP
GROCERY-STORE JJ
GRODNIK NNP
GROFF NNP
GROHL NNP
Gro-Lites NNPS
GRO-LITES NNPS
GROMOV NNP
GRO NNP
GROOM NNP
GROOVE NN
groped VBD
GROPED VBD
GROSSE NNP
GROSSING VBG
gross JJ
GROSS JJ NNP
GROSSLY RB
GROSSMAN NNP
GROSSNER NNP
Gross NNP JJ
grotesque JJ
GROTESQUE JJ
GROTON NNP
GROTTOES NNS
GROUCHO NNP
GROUNDBALL NN
GROUND-BASED JJ
GROUNDBREAKERS NNS
ground-cargo NN
GROUND-CARGO NN
grounded VBN
GROUNDED VBN
GROUND-HANDLING NN NNS
ground-handling NNS NN
grounding VBG NN
GROUNDING VBG NN
GROUND NN NNP VB VBD VBN JJ
Ground NNP NN
ground NN VB VBN VBD JJ
GROUNDS-CARE JJ
Grounds NNPS
GROUNDS NNS NNPS
groundup JJ
GROUNDUP JJ
GROUNDWATER NNP
GROUNDWORK NN
grouped VBN
GROUPED VBN
GROUPEMENT NNP
GROUPE NNP
GROUP NN NNP VB
group NN VB
Groups NNS
GROUPS NNS
groused VBD
Groused VBD
GROUSED VBD
grouses VBZ
GROUSES VBZ
grovels VBZ
GROVELS VBZ
GROVE NNP NN
GROVER NNP
GROWER NN
GROWERS NNS
Growing VBG
GROWING VBG
growing VBG NN JJ
GROWING VBG NN JJ
growls VBZ
GROWLS VBZ
grown VBN JJ
GROWN VBN JJ
grows VBZ
Grows VBZ
GROWS VBZ
GROWTH-AND-INCOME JJ
GROWTH-CONTROLLING JJ
GROWTH NN
Growth NN NNP
GROWTH NN NNP VB JJ
growth NN VB JJ
GROWTH-ORIENTED JJ
GROWTHS NNS
growth-stock JJ NN
GROWTH-STOCK JJ NN
GROWTH-SUPPRESSING JJ
grow VB VBP
GROW VB VBP
GRP NNP
GRUBB NNP
GRUBER NNP
GRUBEROVA NNP
GRUBMAN NNP
grudging JJ
GRUDGING JJ
GRUDGINGLY RB
grueling JJ VBG
GRUELING JJ VBG
gruesome JJ
GRUESOME JJ
gruff JJ
GRUFF JJ
grumbled VBD
GRUMBLED VBD
grumble VBP
GRUMBLE VBP
GRUMMAN NNP
GRUNDFEST NNP
GRUNTAL NNP
GRUPO NNP
GRUPPE NNP
GRUSIN NNP
G.S. NNP
GSX NNP
g SYM
GTE NNP
GUADALAJARA NNP
GUANGDONG NNP
GUARANA NNP
Guaranteed VBN JJ
guaranteed VBN JJ VBD
GUARANTEED VBN JJ VBD
guaranteeing VBG NN
GUARANTEEING VBG NN
Guarantee NN NNP
guarantee NN VB VBP
GUARANTEE NN VB VBP NNP
guarantees NNS VBZ
GUARANTEES NNS VBZ
GUARANTOR NN
GUARANTY NNP
GUARDEDLY RB
guarded VBN JJ VBD
GUARDED VBN VBD JJ
GUARDIAN NNP NN
GUARDIA NNP
GUARDING VBG
Guard NNP NN
GUARD NNP NN VB VBP
guard NN VB VBP
Guards NNPS
guards NNS VBZ
GUARDS NNS VBZ NNPS
gubernatorial JJ
GUBERNATORIAL JJ
GUBER NNP
GUBER\/PETERS NNP
Guber-Peters NNP NNS JJ
GUBER-PETERS NNP NNS JJ
GUCCI NNP
GUENTER NNP
GUERIN NNP
GUERRILLA-HELD JJ
Guerrilla NN
GUERRILLA NN
Guerrillas NNPS
GUERRILLAS NNS NNPS
guessed VBD
GUESSED VBD
GUESSING VBG
guess VBP VB NN
GUESS VBP VB NN
GUESSWORK NN
guest NN JJ
GUEST NN JJ
Guests NNS
GUESTS NNS
GUEVARA NNP
GUFFEY NNP
GUIDANCE NN
GUIDED-MISSILE JJ NN
guided-missile NN JJ
guided VBN VBD
GUIDED VBN VBD
GUIDELINE NN
Guidelines NNS
GUIDELINES NNS
guide NN VB
GUIDE NN VB NNP
GUIDEPOST NN
GUIDEPOSTS NNS
Guides NNPS NNP
GUIDES NNS NNPS NNP
GUIDING JJ VBG
guiding VBG JJ
GUIGAL NNP
GUILDER NN
GUILDERS NNS
GUILDFORD NNP
GUILD NN NNP
GUILE NN
GUILHERME NNP
GUILLERMO NNP
GUILT NN
guilty JJ RB
GUILTY JJ RB
GUINEA NNP NN
GUINNESS NNP
GUISE NN
GUITAR NN
GUJARAT NN NNP
Gujarat NNP NN
GULAG NNP
GULBUDDIN NNP
GULCH NNP
GULF NNP NN
GULICK NNP
GULLIBLE JJ
GUMBEL NNP
GUMKOWSKI NNP
GUM NN
GUMUCIO NNP
GUNBOATS NNS
GUN-CARRYING JJ
GUNDLE NNP
gungho JJ
GUNG-HO JJ
GUNGHO JJ
gunmen NNS
Gunmen NNS
GUNMEN NNS
gunned VBN
GUNNED VBN
GUNNER NN NNP
GUNNERS NNS
GUN NN NNP
GUNNY NN
GUNPOINT NN
GUN-RUNNING JJ NN
gun-running NN JJ
GUNSHIP NN
GUNSHOT NN
GUN-SHY JJ
GUNSLINGING VBG
Guns NNS
GUNS NNS
GUPPY NNP
GUPTA NNP
GUR NNP
GURRIA NNP
GURTZ NNP
GURU NN
gurus NNS
Gurus NNS
GURUS NNS
gushes VBZ
GUSHES VBZ
gush VBP
GUSH VBP
GUSTAFSON NNP
GUSTAVUS NNP
GUSTO NN
GUTENBERGHUS NNP
GUTERMANN NNP
GUTERMAN NNP
GUTFREUND NNP
GUTFREUND-POSTEL NNP
Gutfreunds NNPS
GUTFREUNDS NNPS
gut NN VB
GUT NN VB
GUTS NNS
gutsy JJ
GUTSY JJ
GUTTER NN
GUTTMAN NNP
GUT-WRENCHING JJ
GUY NN NNP
Guys NNS
GUYS NNS
GUZEWICH NNP
GUZMAN NNP
guzzle VB
GUZZLE VB
GWYN NNP
GYMNASTIC JJ
GYMNASTICS NNS
GYPSUM NNP
GYPSY NN
gyrated VBD
GYRATED VBD
gyrate VB
GYRATE VB
GYRATING VBG
GYRATION NN
GYRATIONS NNS
HAAGEN-DAZS NNP
HAAGEN NNP
HAAG NNP
HAAS NNP
HABEAS NNS
HABERDASHERY NN
HABERLE NNP
HABITAT NN
HABITATS NNS
HABIT NN
HABITS NNS
HACCHE NNP
HACHETTE NNP
HACHUEL NNP
HACKEL NNP
HACKENSACK NNP
HACKER NN
HACKERS NNS
HACKLES NNS
HACKMAN NNP
HACKSAW NNP
HACKS NNS
hack VB
HACK VB
HADEN NNP
HADHAZY NNP
HADLEY NNP
HADSON NNP
Had VBD
had VBD VBN
HAD VBD VBN
HAFER NNP
HAGEN NNP
HAGER NNP
haggle VB
HAGGLE VB
HAGGLINGS NNS
HAGGLING VBG
HAGOOD NNP
HAHNEMANN NNP
HAHN NNP
hailed VBD VBN
HAILED VBD VBN
HAILE NNP
HAILING VBG
HAIL NN
hails VBZ
HAILS VBZ
HAINES NNP
HAIR-CARE JJ
HAIRDRESSER NN
HAIR-GROWING JJ
HAIRLINE NN
HAIR NN
HAIRSPRAY NN
HAIR-TRIGGER JJ
hairy JJ
HAIRY JJ
HAIRYKNUCKLED JJ
Haitian JJ
HAITIAN JJ
HAITI NNP
HAJAK NNP
HAJIME NNP
HAKIM NNP
HAKKO NNP
HAKUHODO NNP
HALAS NNP
HALCION NNP
HALE NNP
HALF-ACRE JJ
half-an-hour NN
HALF-AN-HOUR NN
HALF-BAKED JJ
half-block NN
HALF-BLOCK NN
half-brother NN
HALF-BROTHER NN
half-century NN
HALF-CENTURY NN
HALF-COMPLETED JJ
half-dozen NN JJ
HALF-DOZEN NN JJ
HALF-EMPTY JJ
HALF-FORGOTTEN JJ
HALF-FULL JJ
HALFHEARTED JJ
HALFHEARTEDLY RB
half-hour NN JJ
HALF-HOUR NN JJ
HALF-INDUSTRIAL JJ
half-interest NN
HALF-INTEREST NN
half-life NN
HALF-LIFE NN
half-measure NN
HALF-MEASURE NN
Half NN PDT DT
half NN PDT DT JJ RB
HALF NN PDT DT JJ RB
HALF-OWNED JJ
HALF-POINT JJ
half-share NN
HALF-SHARE NN
HALF-STAFF JJ
half-states NNS
HALF-STATES NNS
half-time NN
HALF-TIME NN
HALFTIME NN
HALF-WAY JJ
halfway RB
HALFWAY RB
Half-year JJ
half-year NN
HALF-YEAR NN JJ
HALIS NNP
HALLE NNP
HALLETT NNP
Halliburton NN NNP
HALLIBURTON NNP NN
HALLINGBY NNP
HALLMARK NN NNP
HALL NNP NN
HALLOWED JJ
HALLOWEEN NNP
HALLS NNS NNP
HALLUCIGENIA NNP
HALLWAY NN
HALLWAYS NNS
HALLWOOD NNP
HAL NNP
halogenated VBD
HALOGENATED VBD
HALOGEN NN
HALO NN
HALPERN NNP
HALSEY NNP
HALSTED NNP
halted VBN VBD NN
HALTED VBN VBD NN
HALTINGLY RB
halting VBG JJ
HALTING VBG JJ
halt NN VB VBP
HALT NN VB VBP
halts NNS VBZ
HALTS NNS VBZ
HALVA-NEUBAUER NNP
halved VBN JJ VBD
HALVED VBN VBD JJ
halves VBZ NNS
HALVES VBZ NNS
halve VB
HALVE VB
Hamakua NN
HAMAKUA NN
HAMBRECHT NNP
HAMBROS NNP
HAMBURGER NN
HAMBURGERS NNS
HAMBURG NNP
HAM-HANDED JJ
HAMILTON-DORGAN NNP
HAMILTON NNP
HAMMACHER NNP
HAMMACK NNP
Hammacks NNP NNPS
HAMMACKS NNP NNPS
hammered VBN
HAMMERED VBN
hammering VBG NN
HAMMERING VBG NN
HAMMERSCHMIDT NNP
HAMMERSMITH NNP
HAMMERSTEIN NNP
HAMMERTON NNP
hammer VB NN
HAMMER VB NN
HAMMETT NNP
HAMMING VBG
HAMMOND NNP
HAM NN
hampered VBN VBD
HAMPERED VBN VBD
HAMPERING VBG
hampers VBZ
HAMPERS VBZ
hamper VB
HAMPER VB
HAMPSHIRE NNP
HAMPSTER NNP
HAMPTON NNP
hamstring VB
HAMSTRING VB
hamstrung VBP JJ VBN
HAMSTRUNG VBP JJ VBN
HANAO NNP
HANAUER NNP
HANCOCK NNP
HANDBILLS NNS
HANDBOOK NNP
HANDBOOKS NNS
hand-carried VBN
HAND-CARRIED VBN
HAND-CARVED JJ
HAND-CRAFTED JJ
handcuffed VBN
HANDCUFFED VBN
HANDCUFFS NNS
handed VBN VBD
HANDED VBN VBD
HANDELSBANKEN NNP
HANDELSMAN NNP
handful NN
HANDFUL NN
handheld JJ
HAND-HELD JJ
HANDHELD JJ
Hand-holding NN
HAND-HOLDING NN
handicap NN VB
HANDICAP NN VB
HANDICAPPED NNP NNS JJ VBN
handicapped NNS JJ VBN
HANDILY RB
handled VBN VBD
HANDLED VBN VBD
HANDLERS NNS
handles VBZ
HANDLES VBZ
handle VB VBP
HANDLE VB VBP
handling VBG NN
HANDLING VBG NN
hand-lotion NN
HAND-LOTION NN
handmade JJ
HANDMADE JJ
HANDMAID NNP
hand NN VB RB
HAND NN VB RB
HANDOUT NN
HAND-PICKED JJ
handpicked VBN
HANDPICKED VBN
HANDSHAKE NN
HAND-SIZED JJ
hands NNS VBZ
HANDS NNS VBZ
handsome JJ
HANDSOME JJ
HANDSOMELY RB
HANDS-ON JJ
HANDSTANDS NNS
HAND-TOOLED JJ
hand-wringing NN
HAND-WRINGING NN
handwriting NN
HANDWRITING NN
handwritten JJ
HANDWRITTEN JJ
handy JJ
HANDY JJ NNP
HANDZLIK NNP
HANEY NNP
HANGAR NN
hanged VBN
HANGED VBN
hanging VBG NN
HANGING VBG NN
HANG NNP VB VBP
HANGOVER NN
hangs VBZ
HANGS VBZ
HANG-TOUGH JJ
hang VB VBP
HANIFEN NNP
HANI NNP
HANK NN
HANKS NNP
HANNAH NNP
HANNIBAL NNP
HANNIFIN NNP
HANN NNP
HANNOVER NNP
HANOI NNP
HANOVER NNP
HANS-DIETRICH NNP
HANSEN NNP
HANSHIN NNP
HANS NNP
HANSON NNP
HANWA NNP
haole FW
Haole FW
HAOLE FW
haphazard JJ
HAPHAZARD JJ
HAPLESS JJ
happened VBD VBN
Happened VBD VBN
HAPPENED VBD VBN
HAPPENINGS NNS
happening VBG NN
HAPPENING VBG NN
HAPPENSTANCE NN
happens VBZ
HAPPENS VBZ
happen VB VBP
HAPPEN VB VBP
happier JJR
HAPPIER JJR
Happily RB
HAPPILY RB
happiness NN
HAPPINESS NN
happy JJ
HAPPY JJ NNP
Happy NNP JJ
harangues NNS VBZ
HARANGUES NNS VBZ
HARA NNP
harassed VBD
HARASSED VBD
HARASSING VBG
HARASSMENT NN
harass VB
HARASS VB
HARBANSE NNP
HARBINGER NN
HARBORING VBG
HARBOR NNP NN VBP
harbor NN VBP
Harbors NNPS
HARBORS NNPS NNS VBZ
harbors NNS VBZ
HARCOURT NNP
HARDBALL NN
HARD-BITTEN JJ
HARD-BOILED JJ
hardbound JJ
HARDBOUND JJ
hard-charging JJ NN
HARD-CHARGING NN JJ
HARDCORE NN
HARDCOVER NN
HARD-CURRENCY JJ NN
hard-currency NN JJ
HARDDISK NN
hard-disk NN JJ
HARD-DISK NN JJ
HARD-DRINKING JJ
HARD-EARNED JJ
HARDEE NNP
HARDENED JJ VBN
hardened VBN JJ
harder JJR RBR RB
HARDER JJR RBR RB
HARDER-LINE JJ
HARDEST-HIT JJ
hardest JJS RBS
HARDEST JJS RBS
Hardest RBS JJS
HARD-HIT JJ
Hard-hitting JJ
HARD-HITTING JJ
HARDIMAN NNP
HARDIS NNP
hard JJ RB
HARD JJ RB NNP
HARD-LINE JJ
hard-liner NN
HARD-LINER NN
HARDLINER NN
Hardly RB
HARDLY RB
Hard NNP RB
HARD-NOSED JJ
HARDSHIP NN
HARDSHIPS NNS
HARD-TO-FAULT JJ
hardware-maintenance NN
HARDWARE-MAINTENANCE NN
HARDWARE NN NNP
HARD-WIRE JJ
HARDWOOD NN
hardworking JJ
HARDWORKING JJ
hardy JJ
HARDY JJ
HARE-BRAINED JJ
HARGRAVE NNP
HARKEN NNP
HARKIN NNP
HARKINS NNP
HARLAND NNP
HARLAN NNP
HARLEM NNP
HAR-LEV NNP
HARLEY-DAVIDSON NNP
HARLEY NNP
HARLOW NNP
HARMAN NNP
harmed VBN VBD
HARMED VBN VBD
HARMFUL JJ
HARMLESS JJ
harm NN VB VBP
HARM NN VB VBP
HARMONIA NNP
HARMONIC JJ
HARMONIOUS JJ
HARMONY NN
HARMS VBZ NNP NNS
harms VBZ NNS
HARNESSING VBG
harness NN
HARNESS NN
HAROLD NNP
harped VBD
HARPED VBD
HARPENER NNP
HARPER NNP
HARPING VBG
HARPO NNP
harp VB
HARP VB
HARRAH NNP
harried VBN
HARRIED VBN
HARRIET NNP
HARRIMAN NNP
HARRINGTON NNP
Harrisburg NNP NN
HARRISBURG NNP NN
HARRIS NNP
HARRISON NNP
HARRITON NNP
HARROLD NNP
harrowing JJ
HARROWING JJ
HARRY NNP
HARSCO NNP
harsher JJR
HARSHER JJR
harshest JJS
HARSHEST JJS
harsh JJ
HARSH JJ
HARSHLY RB
harshness NN
HARSHNESS NN
HARTE-HANKS NNP
HARTFORD NNP
HARTIGAN NNP
HARTLEY NNP
HARTMAN NNP
HARTMARX NNP
HARTNETT NNP
HART NNP
HART-SCOTT NNP
Hart-Scott-Rodino NNP JJ
HART-SCOTT-RODINO NNP JJ
HARTT NNP
HARTUNG NNP
HARTWELL NNP
HARTY NNP
HARUKI NNP
HARVARD NNP
harvested VBN
HARVESTED VBN
harvesting NN
HARVESTING NN
harvest NN VBP
HARVEST NN VBP
HARVESTS NNS
HARVEY NNP
HARVIE NNP
HARWOOD NNP
HASBRO NNP
HASBROUK NNP
HASENAUER NNP
HASHIDATE NNP
HASHING VBG
HASHISH NN
Hasidic JJ
HASIDIC JJ
HASKAYNE NNP
HASKINS NNP
HASSAN NNP
HASSENFELD NNP
HASSE NNP
HASSLE NN
HASSLES NNS
hastened VBN
HASTENED VBN
Haste NN
HASTE NN
hasten VB
HASTEN VB
HASTERT NNP
HASTILY RB
HASTINGS NNP
hasty JJ
HASTY JJ
Has VBZ
HAS VBZ
has VBZ VBP VBN
HAS VBZ VBP VBN
HATAKEYAMA NNP
HATBOX NN
hatched VBN
HATCHED VBN
HATCHET NN
HATCHETT NNP
HATCH NNP VB
hatch VB
hated VBN
HATED VBN
hates VBZ
HATES VBZ
hate VBP VB NN
HATE VBP VB NN
HATFIELD NNP
HATHAWAY NNP
HATHCOCK NNP
HAT NN
hatred NN
HATRED NN
HATS NNS
HAUGHEY NNP
haughty JJ
HAUGHTY JJ
HAULAGE NN
hauled VBD
HAULED VBD
HAULERS NNS
HAULING VBG
haul NN VB
HAUL NN VB
haunted VBN JJ
HAUNTED VBN JJ
HAUNTING NN VBG
haunting VBG NN
haunts NNS VBZ
HAUNTS NNS VBZ
haunt VB VBP
HAUNT VB VBP
HAUPTMAN NNP
HAUSER NNP
HAUSSMANN NNP
HAUT-BRION NNP
HAUTEUR NN
HAVANA NNP
HAVEL NNP
HAVEN NNP NN
HAVE-NOT JJ
HAVENS NNS
Have VBP NNP VB
HAVE VBP VB NNP JJ VBD VBN
have VBP VB VBD JJ VBN
Having VBG
HAVING VBG
HAVOC NN
Hawaiian\/Japanese JJ
HAWAIIAN\/JAPANESE JJ
Hawaiian JJ
HAWAIIAN JJ
HAWAII NNP NNPS NNS
Hawaii NNP NNS NNPS
HAWESVILLE NNP
HAWKE NNP
HAWKER NNP
HAWKERS NNS
HAWKING VBG
HAWKINS NNP
hawkish JJ
HAWKISH JJ
hawk NN VBP
HAWK NN VBP
Hawks NNPS
HAWKS NNS NNPS
HAWLEY NNP
HAWORTH NNP
Hawthorne NN NNP
HAWTHORNE NNP NN
HAYASAKA NNP
HAYES NNP
HAYNE NNP
HAY NN NNP
HAYS NNP
HAYWARD NNP
HAZARD NN
Hazardous JJ
HAZARDOUS JJ
hazardous-waste NN JJ
HAZARDOUS-WASTE NN JJ
hazardous-waste-site NN
HAZARDOUS-WASTE-SITE NN
HAZARDS NNS
HAZELL NNP
HAZELNUT NN
HBJ NNP
HBO NNP
HCFCs NNS
HCFCS NNS
HDM NNP
HD NNP
HDTV NN NNP
HDTV-screen JJ
HDTV-SCREEN JJ
HDTVs NNS
HDTVS NNS
HEADACHE NN
HEADACHES NNS
HEAD-BUTTING JJ
headcount-control NN
HEADCOUNT-CONTROL NN
Headed VBN
headed VBN VBD
HEADED VBN VBD
head-hunting NN
HEAD-HUNTING NN
Heading VBG
HEADING VBG
HEADLEY NNP
HEADLIGHTS NNS
headlined VBN VBD
HEADLINED VBN VBD
HEADLINE-GRABBING JJ
HEADLINE NN NNP
HEADLINES NNS
headlong RB
HEADLONG RB
HEADLY NNP
head NN VB VBP JJ
HEAD NN VB VBP JJ NNP
HEADPHONES NNS
headquarter JJ
HEADQUARTER JJ
headquarters NN NNS
HEADQUARTERS NN NNS
HEADRESTS NNS
HEADSETS NNS
heads VBZ NNS
HEADS VBZ NNS
head-to-head RB
HEAD-TO-HEAD RB
HEADWAY NN
heady JJ
Heady JJ
HEADY JJ
healed VBN
HEALED VBN
healing NN VBG
HEALING NN VBG
HEALTH-AND-BENEFITS JJ
HEALTH-BENEFITS JJ
Health-care JJ
HEALTH-CARE NN
health-care NN JJ
HEALTH-CARE NN JJ
HEALTHCARE NNP NN
health-care-product NN
HEALTH-CARE-PRODUCT NN
HEALTH-CLUB JJ
HEALTH-CONSCIOUS JJ
health-coverage NN
HEALTH-COVERAGE NN
HEALTHDYNE NNP
HEALTH-EXPENDITURE JJ
health-food NN
HEALTH-FOOD NN
healthier JJR RBR
HEALTHIER JJR RBR
healthiest JJS
HEALTHIEST JJS
Health-insurance NN
HEALTH-INSURANCE NN
health-maintenance NN
HEALTH-MAINTENANCE NN
HEALTH NN NNP
Health NNP NN
HEALTH-ORIENTED JJ
health-products NNS
HEALTH-PRODUCTS NNS
HEALTHSOURCE NNP
HEALTHVEST NNP
healthy JJ
Healthy JJ
HEALTHY JJ
heal VB
HEAL VB
HEALY NNP
heaped VBD VBN
HEAPED VBD VBN
HEAPING VBG
HEAP NN
Heard VBN NNP
heard VBN VBD
HEARD VBN VBD NNP
hearing NN VBG
HEARING NN VBG
Hearings NNS
HEARINGS NNS
Hearing VBG
HEARST NNP
hears VBZ
HEARS VBZ
HEARTBEAT NN
heartened VBN
HEARTENED VBN
heartfelt JJ
HEARTFELT JJ
HEARTLAND NN
HEART NN NNP RB
heart NN RB
HEART-POUNDING JJ
HEART-RENDING JJ
Hearts NNPS
HEARTS NNS NNPS
heartstopping JJ
HEARTSTOPPING JJ
HEARTWARMINGLY RB
HEARTWISE NNP
hearty JJ
HEARTY JJ
hear VB VBP
HEAR VB VBP
heated JJ VBN
HEATED JJ VBN
HEATEDLY RB
HEATER NN
HEATERS NNS
heathen JJ
HEATHEN JJ
HEATHERINGTON NNP
HEATHROW NNP
heating NN VBG
Heating NN VBG
HEATING NN VBG
heat NN VB
HEAT NN VB NNP
heats VBZ
HEATS VBZ
heat-treatment NN
HEAT-TREATMENT NN
HEAT-USING JJ
heaved VBN VBD
HEAVED VBN VBD
HEAVEN NN
HEAVENS NNS
heaves VBD
HEAVES VBD
heavier JJR RBR
HEAVIER JJR RBR
HEAVIER-THAN-NORMAL JJ
HEAVIER-THAN-USUAL JJ
heaviest JJS
HEAVIEST JJS
HEAVILY RB
heavy-construction NN
HEAVY-CONSTRUCTION NN
heavy-crude NN
HEAVY-CRUDE NN
HEAVY-DUTY JJ
HEAVY-HANDED JJ
heavy-handedness NN
HEAVY-HANDEDNESS NN
heavy-industry NN
HEAVY-INDUSTRY NN
HEAVY JJ
heavy JJ NN
HEAVY JJ NNP NN
HEAVY-MACHINE JJ
Heavy NNP JJ
HEAVY-TRACKED JJ
heavy-truck NN
HEAVY-TRUCK NN
heavy-water NN
HEAVY-WATER NN
heavyweight JJ
HEAVYWEIGHT JJ
HEAVYWEIGHTS NNS
HEBER NNP
HEBERT NNP
HEBERTO NNP
heckled VBN
HECKLED VBN
heck NN UH
HECK NN UH
HECLA NNP
HECTIC JJ
HECTOR NNP
HEDGERS NNS
HEDGES NNP NNS
hedge VB NN JJ VBP
HEDGE VB NN JJ VBP
hedging VBG NN VBG|JJ
HEDGING VBG NN VBG|JJ
heebie-jeebies NNS
HEEBIE-JEEBIES NNS
heeded VBD VBN
HEEDED VBD VBN
heed VB NN
HEED VB NN
HEEL NN
HEELS NNS
HEEM NNP
Hee NNP UH
HEERDEN NNP
HEES NNP
HEE UH
HEFFNER NNP
HEFNER NNP
heftier JJR
HEFTIER JJR
hefty JJ
HEFTY JJ
HEGEMONY NN
HE-GOES-OR-I-GO JJ
HEIDELBERG NNP
HEIDI NNP
HEIGHBORHOODS NNS
Heightened JJ
heightened VBN JJ VBD
HEIGHTENED VBN JJ VBD
heighten VB
HEIGHTEN VB
HEIGHT NN
Heights NNP NNPS
HEIGHTS NNP NNS NNPS
HEIKO NNP
HEILEMAN NNP
HEIMERS NNP
HEINEKEN NNP
HEINEMANN NNP
HEINE NNP
HEINHOLD NNP
HEIN NNP
HEI NNP
HEINOUS JJ
HEINZ NNP
HEIR NN
HEIRS NNS
HEISBOURG NNP
HEIST NN
HEITMAN NNP
HEIWADO NNP
HEIWA NNP
HEKHMATYAR NNP
HELABA NNP
HELANE NNP
held VBN VBD JJ
HELD VBN VBD JJ
HELENA NNP
HELEN NNP
HELFMAN NNP
HELGA NNP
HELICOPTER NN
Helicopters NNPS
HELICOPTERS NNS NNPS
HELIONETICS NNP
HELIX NN
HELL-BENT JJ
HELLENIC NNP
HELLER\/BREENE NNP
HELLER NNP
HELLIESEN NNP
hell-kitten NN
HELL-KITTEN NN
HELLMAN NNP
hell NN UH
HELL NN UH
hello UH
Hello UH
HELLO UH
HELLS NNP
HELMETED JJ
Helmet NN
HELMET NN
HELM NN NNP
HELMSLEY NNP
HELMSLEY-SPEAR NNP
HELMSLEYSPEAR NNP
HELMS NNP
HELMUTH NNP
HELMUT NNP
helped VBD VBN VBP
HELPED VBD VBN VBP
Helped VBN
HELPERN NNP
HELPER NNP
HELPFUL JJ
Helping VBG
HELPING VBG
HELPLESS JJ NNP
HELPLESSLY RB
helps VBZ
Helps VBZ
HELPS VBZ
Help VB NN
help VB NN VBP
HELP VB NN VBP
HELSINKI NNP
HEMINGWAY NNP
HEMISPHERE NN NNP
HEMISPHERIC JJ NNP
HEMMER NNP
HEMMING NNP
HEM NN
HEMOGLOBIN NN
hemorrhaged VBN
HEMORRHAGED VBN
HEMORRHAGING NN VBG JJ
hemorrhaging VBG NN JJ
HEMORRHOIDS NNS
HEMPEL NNP
HEMWEG NNP
hence RB
Hence RB
HENCE RB
HENDERSON NNP
HENDRIK NNP
HENLEY NN NNP
Henley NNP NN
HENNESSY NNP
HENNING NNP
HENRIK NNP
HENRI NNP
HENRY NNP
Hens NNS
HENS NNS
HENSON NNP
hepatitis NN NNP
HEPATITIS NN NNP
he PRP
He PRP
HE PRP
HERALD-AMERICAN NNP
heralded VBN
HERALDED VBN
HERALD NNP VB VBP
HERALD-POST NNP
herald VB VBP
herbal JJ
HERBAL JJ
HERBERT NNP
HERBICIDE NN
HERBICIDES NNS
HERBIG NNP
HERB NN NNP
Hercules NNP NNS
HERCULES NNP NNS
HERDING NN VBG
herding VBG NN
HERD NN
HERDS NNS
hereabouts RB
HEREABOUTS RB
hereafter RB
HEREAFTER RB
HEREDITARY JJ
HEREDITY NN
here RB
Here RB
HERE RB
HERETICAL JJ
heretofore RB
HERETOFORE RB
HERITAGE NNP NN
HERMANN NNP
HERMAN NNP
HERMITAGE NNP
HERNANDEZ NNP
herniated VBN
HERNIATED VBN
HEROES NNS
HEROIC JJ
HEROINE NN
HEROIN NN
HERO NN
HERON NNP
HERONS NNS
her PRP$ PRP
Her PRP$ PRP
HER PRP$ PRP
HERRERA NNP
herring NN
HERRING NN NNP
HERRINGTON NNP
HERRMAN NNP
HERSCHEL NNP
HERSCU NNP
herself PRP
HERSELF PRP
HERSEY NNP
HERSHEY NNP
HERSHHENSON NNP
HERSHISER NNP
Hers JJ
HERSLOW NNP
HERSLY NNP
hers PRP
HERS PRP JJ
HERTZ NNP
HERWICK NNP
HERZFELD NNP
HERZOG NNP
hesitant JJ
HESITANT JJ
HESITANTLY RB
hesitate VB VBP
HESITATE VB VBP
HESITATING VBG
HESITATION NN
HESSE-DARMSTADT NNP
HESSE NNP
HESSISCHE NNP
HESS NNP
HESTON NNP
HETEROGENEOUS JJ
HEUBLEIN NNP
hewed VBD
HEWED VBD
HEWITT NNP
HEWLETT NNP
HEWLETT-PACKARD NNP
hewn VBN
HEWN VBN
hews VBZ
HEWS VBZ
HEXCEL NNP
HEYDAY NN
Heyden NN NNP
HEYDEN NN NNP
HEYMAN NNP
HEYNOW NNP
hey UH
HEY UH
H.F. NNP
H.G. NNP
HG NNP
H.H. NNP
HHS NNP
HIAA NNP
hiatus NN
HIATUS NN
HIBBARD NNP
HIBBEN NNP
HIBERNIA NNP
HIBLER NNP
HIB NNP
HIBOR NNP
HICCUP NN
HICKEY NNP
HICKMAN NNP
HICK NN
HICKS NNP
hidden VBN JJ
HIDDEN VBN JJ
HIDEAWAY NN
hidebound JJ
HIDEBOUND JJ
HIDEOUS JJ
HIDEOUTS NNS
HIDERS NNS
HIDES NNS
hide VB
HIDE VB
HIDING NN VBG
hiding VBG NN
hid VBD
HID VBD
HIERARCHICAL JJ
HIERARCHY NN
HIGGINS NNP
HIGH-ALTITUDE JJ
HIGH-BACKED JJ
HIGH-BALANCE JJ
HIGH-BETA JJ
HIGH-BLOOD-PRESSURE JJ
HIGH-CAPACITY JJ
HIGH-CLASS JJ
HIGH-COST JJ
HIGH-COUPON JJ
HIGH-CRIME JJ
High-definition JJ
high-definition JJ NN
HIGH-DEFINITION JJ NN
High-end JJ
HIGH-END JJ
higher-cost JJ JJR
HIGHER-COST JJ JJR
higher-fat JJR
HIGHER-FAT JJR
HIGHER-INCOME JJ JJR
Higher-income JJR
Higher JJR NNP
higher JJR RBR
HIGHER JJR RBR NNP
HIGHER-MULTIPLE JJ
HIGHER-PRICED JJ
higher-profit JJR
HIGHER-PROFIT JJR
higher-quality NN
HIGHER-QUALITY NN
HIGHER-SALARIED JJ
HIGHER-THAN-EXPECTED JJ
Highest JJS
highest JJS RB RBS
HIGHEST JJS RB RBS
HIGHEST-PITCHED JJ
highest-priced JJS
HIGHEST-PRICED JJS
highest-quality JJ JJS NN
HIGHEST-QUALITY JJ NN JJS
HIGHEST-RANKING JJ
HIGHEST-RATED JJ
HIGHEST-VOLUME JJ
HIGHEST-YIELDING JJ
high-fidelity NN
HIGH-FIDELITY NN
HIGH-FLYING JJ
HIGH-GLOSS JJ
High-grade JJ
HIGH-GRADE JJ NNP
high-growth NN
HIGH-GROWTH NN
HIGH-HANDED JJ
HIGH-HEELED JJ
HIGH-HORSEPOWER JJ
HIGH-INCOME JJ
HIGH-INTEREST JJ
HIGH-INTEREST-RATE JJ
HIGH JJ NNP NN RB
high JJ NN RB
HIGHLANDER NNP
HIGHLAND NNP
HIGHLANDS NNS
HIGH-LEVEL JJ
HIGH-LEVERAGE JJ
highlighted VBN VBD
HIGHLIGHTED VBN VBD
HIGHLIGHTING VBG
Highlights NNS
HIGHLIGHTS NNS VBZ
highlights VBZ NNS
highlight VB NN
HIGHLIGHT VB NN
HIGH-LIVING JJ
HIGHLY-CONFIDENT JJ
HIGHLY RB NNP
HIGH-MINDED JJ
high-mindedness NN
HIGH-MINDEDNESS NN
high-net NN
HIGH-NET NN
HIGH-NET-WORTH JJ
High NNP JJ
HIGH-OCTANE JJ
HIGH-PAID JJ
HIGH-PAYING JJ
high-performance JJ NN
HIGH-PERFORMANCE JJ NN
HIGH-PERFORMING JJ
HIGH-POLLUTING JJ
HIGH-POWERED JJ
HIGH-PRESSURE JJ
HIGH-PRICED JJ
HIGHPRICED JJ
HIGH-PRODUCTION JJ
HIGH-PROFILE JJ
HIGH-PROFIT JJ
high-purity NN
HIGH-PURITY NN
high-quality JJ NN
HIGH-QUALITY JJ NN
HIGH-RANKING JJ
HIGH-RATE JJ
HIGH-RISE JJ
HIGH-RISE-PROJECT JJ
high-rises NNS
HIGH-RISES NNS
high-risk JJ CD
HIGH-RISK JJ CD
HIGH-ROLLING JJ
HIGH-SCHOOL NN
high-school NN JJ
HIGH-SCHOOL NN JJ
HIGH-SECURITY JJ
HIGHS NNS
high-society NN
HIGH-SOCIETY NN
HIGH-SPEED JJ
HIGH-STAKES JJ
HIGH-STANDARD JJ
HIGH-STRUNG JJ
HIGH-SULFUR JJ
HIGHTAILING VBG
HIGH-TAX JJ
High-Tech JJ
high-tech JJ NN
HIGH-TECH JJ NN
HIGH-TECHNOLOGICAL JJ
high-technology NN JJ
HIGH-TECHNOLOGY NN JJ
HIGH-TEMPERATURE JJ
HIGH-TONED JJ
HIGHTOPS NNS
high-visibility JJ NN
HIGH-VISIBILITY NN JJ
HIGH-VOLUME JJ
HIGH-WATER JJ
HIGHWAY-CONSTRUCTION JJ
HIGHWAY NN NNP
Highway NNP NN
HIGHWAY-RELIEF JJ
Highways NNS
HIGHWAYS NNS
High-yielding JJ
HIGH-YIELDING JJ
High-yield JJ
high-yield JJ NN
HIGH-YIELD JJ NN NNP
HIJET NNP
hiked VBN
HIKED VBN
HIKE NN
HIKER NN
HIKERS NNS
HIKES NNS
hiking NN
HIKING NN
HILARIOUS JJ
HILDEBRANDT NNP
HILDER NNP
HILGER NNP
HILLARY NNP
HILLHAVEN NNP
HILLMAN NNP
HILL NNP NN
HILLSBORO NNP
HILLSDOWN NNP
HILLSIDE NN
Hills NNP NNPS
HILLS NNP NNPS NNS
hilly JJ
HILLY JJ
HILTON NNP
Hiltons NNPS
HILTONS NNPS
HILTUNEN NNP
HIMEBAUGH NNP
HIME NNP
HIMONT NNP
him PRP
Him PRP
HIM PRP
himself PRP
Himself PRP
HIMSELF PRP
HINDEMITH NNP
hindered VBD VBN
HINDERED VBD VBN
HINDERING VBG
hinders VBZ
HINDERS VBZ
hinder VB
HINDER VB
HINDU NNP
HINES NNP
hinge VB
HINGE VB
HINGHAM NNP
HINGORANI NNP
HINKLE NNP
HINMAN NNP
hinted VBD VBN
HINTED VBD VBN
HINTERLANDS NNS
HINTING VBG
HINT NN VBP VB
hint NN VB VBP
HINTON NNP
hints NNS VBZ
HINTS NNS VBZ
HINZACK NNP
HIP NN
HIPPIE NN NNP
HIPS NNS
HIRAM NNP
Hired VBN
hired VBN VBD
HIRED VBN VBD
hires VBZ NNS
HIRES VBZ NNS
hire VB VBP NN
HIRE VB VBP NN
HIRING NN
hiring VBG NN
HIRING VBG NN
HIROAKI NNP
HIROSHIMA NNP
HIROSHI NNP
HIROYUKI NNP
HIRSCHFELD NNP
HIRSCH NNP
HISHAM NNP
HISMANAL NNP
Hispanic JJ NNP
HISPANIC JJ NNP
Hispanics NNPS NNS
HISPANICS NNPS NNS
HISPANOIL NNP
His PRP$
HIS PRP$
his PRP$ PRP
HIS PRP$ PRP
hissed VBD
HISSED VBD
HISS NNP
HISTORIAN NN
HISTORIANS NNS
historical-claims NNS
HISTORICAL-CLAIMS NNS
HISTORICAL JJ
HISTORICALLY RB NNP
historicized VBN
HISTORICIZED VBN
HISTORIC JJ
History NN
HISTORY NN
HITACHI NNP
hitched VBN
HITCHED VBN
HITCHES NNS
HITCH NN
HI-TECH JJ
hither RB
HITHER RB
HITLER NNP
hits NNS VBZ
HITS NNS VBZ
HITTER NN
HITTERS NNS
HITTING VBG
hit VBD VBN NN VB VBP
HIT VBD VBN VB NN VBP
Hit VBP VBN
HIV-1 NNP
HIVE NNP
HIXSON NNP
H.J. NNP
HK$ $
HK NNP
H.L. NNP
HLR NNP
Hmong NNPS
HMONG NNPS
HMS NNP
HNILICA NNP
H.N. NNP
HN NNP
H NNP NN
H. NNP NN
HOA NNP
HOARDER NN
hoarding NN VBG
HOARDING NN VBG
hoard NN VBP
HOARD NN VBP
HOARDS NNS
HOARE NNP
HOBBIES NNS
hobbled VBN
HOBBLED VBN
hobbles VBZ
HOBBLES VBZ
HOBBLING VBG
HOBBYISTS NNS
HOBBY NN
HOBOKEN NNP
HOBOS NNS
hoc FW
HOC FW NNP
HOCHIMINH NNP
HOCKE NNP
HOCKNEY NNP
HOCK NN
HODGE NNP
HODGEPODGE NN
HODGES NNP
HODGKIN NNP
HODGSON NNP
HODSON NNP
HOECHST NNP
HOELZER NNP
HOENLEIN NNP
Hoe VB
HOE VB
HOFFMANN-LA NNP
HOFFMAN NNP
HOFI NNP
HOGAN NNP
HOGG NNP
hog NN NNS
HOG NN NNS
Hogs NNS
HOGS NNS
HO-HUM JJ
hoisted VBN
HOISTED VBN
hoisting NN
HOISTING NN
HOKKAIDO NNP
HOKURIKU NNP
HOLCOMB NNP
HOLDERBANK NNP
HOLDER NN
Holders NNS
HOLDERS NNS
Holding NNP VBG
Holdings NNP NNPS NNS
HOLDINGS NNS NNP NNPS
holding VBG NN
HOLDING VBG NN NNP
HOLDOUTS NNS
HOLDOVERS NNS
holds VBZ
HOLDS VBZ
HOLDUPS NNS
HOLD VB
Hold VB VBP
hold VB VBP NN VB|NN
HOLD VB VBP NN VB|NN
holed VBN
HOLED VBN
HOLE NN NNP VBP
hole NN VBP
HOLES NNS
HOLEWINSKI NNP
HOLIDAY NNP NN
HOLIDAY-SEASON JJ
HOLIDAYS NNS
holiest JJS
HOLIEST JJS
HOLLANDALE NNP
HOLLANDER NNP
HOLLAND NNP
HOLLER NNP VB
holler VB
HOLLIDAY NNP
HOLLIGER NNP
HOLLINGER NNP
HOLLINGS NNP
HOLLINGSWORTH NNP
HOLLIS NNP
HOLLISTER NNP
HOLLISTON NNP
hollow JJ
HOLLOW JJ
HOLLY NNP
HOLLYWOOD NNP
HOLMES NNP
HOLSTON NNP
HOLT NNP
HOLTZMAN NNP
holy JJ
HOLY NNP JJ
HOLYOKE NNP
HOLZFASTER NNP
HOMAGE NN
HOMART NNP
HOME-ACQUISITION JJ
HOMEBREW NNP
home-building JJ NN
HOME-BUILDING JJ NN
HOME-CARE JJ
homecoming NN
Homecoming NN
HOMECOMING NN
home-computer NN
HOME-COMPUTER NN
HOME-DELIVERED JJ
home-delivery NN
HOME-DELIVERY NN
home-equity JJ NN
HOME-EQUITY JJ NN
HOMEEQUITY NN
HomeFed NNP VBN
HOMEFED NNP VBN
home-improvement NN
HOME-IMPROVEMENT NN
Homeland NN
HOMELAND NN
homeless JJ NN
HOMELESS JJ NN NNP
homelessness NN
HOMELESSNESS NN
Homeless NNP JJ
HOMEMAKER NN
HOME-MARKET JJ
HOME-MORTGAGE JJ
HOME NN NNP RB
Home NNP NN
home NN RB
HOMEOWNER NN NNP
home-ownership NN
HOME-OWNERSHIP NN
HOMEOWNERS NNS
HOME-PRODUCED JJ
homered VBD
HOMERED VBD
homer NN VB
HOMER NN VB NNP
HOMEROOM NNP
HOMERS NNS
HOME-RUN JJ NN
Homerun NN
HOMERUN NN
home-run NN JJ
HOME-SALE JJ
home-sharing NN
HOME-SHARING NN
home-shopping NN
HOME-SHOPPING NN
Homes NNPS NNP
HOMES NNS NNP NNPS
HOMESTAKE NNP
HOME-STATE JJ
HOMESTEAD NNP
HOME-TEAM JJ
HOMETOWN NN
HOMEWORK NN
HOMICIDE NN
HOMICIDES NNS
HOMMA NNP
HOMOGENOUS JJ
homologous RB
HOMOLOGOUS RB
Homo NN
HOMO NN
homosexual JJ NN
HOMOSEXUAL JJ NN
Homosexuals NNS
HOMOSEXUALS NNS
Honda NNP NN
HONDA NNP NN
Hondas NNPS
HONDAS NNPS
Honduran JJ
HONDURAN JJ
Hondurans NNS
HONDURANS NNS
Honduras NNP NNS
HONDURAS NNP NNS
HONECKER NNP
honed VBN JJ
HONED VBN JJ
honest JJ
HONEST JJ
HONESTLY RB
HONESTY NN
hone VB
HONE VB
HONEYBEE NNP
HONEYMOON NN
HONEY NN NNP
HONEYWELL NNP
HONGKONG NNP
HONG NNP
HONISS NNP
HO NNP
Honolulu-based JJ
HONOLULU-BASED JJ
HONOLULU NNP
HONORABLE JJ
HONORABLY RB
HONORARIUM NN
HONORARIUMS NNS
HONORARY JJ
honored VBN
HONORED VBN
HONORING VBG
HONORS NNP NNS
honor VB NN VBP
HONOR VB NN VBP
HOOD NN NNP
HOODS NNS
hoodwinked VBN
HOODWINKED VBN
HOOKED JJ VBD VBN
hooked JJ VBN VBD
HOOKER NNP
HOOKING VBG
hook NN VB
HOOK NN VB
hooks VBZ
HOOKS VBZ NNP
hook-up NN
HOOK-UP NN
HOOKUPS NNS
HOOLIGANISM NN
HOOPLA NN
HOOSIER NNP
HOOT NNP
HOOVER NNP
HOOVES NNS
HOPED-FOR JJ
hoped VBN VBD
HOPED VBN VBD
hopeful JJ NN
HOPEFUL JJ NN
Hopefully NNP RB
HOPEFULLY RB NNP
HOPELESS JJ
HOPELESSLY RB
Hopes NNS
HOPES NNS
hopes VBZ NNS
HOPES VBZ NNS
hope VBP NN VB
HOPE VBP NN VB NNP
Hoping VBG
HOPING VBG
HOPKINS NNP
HOP NN
HOPPING VBG
hopscotched VBD
HOPSCOTCHED VBD
hops VBZ
HOPS VBZ
HOPWOOD NNP
HORDE NN
HORDERN NNP
HORICON NNP
HORI NNP
HORIZON NN
HORIZONS NNS NNP
HORIZONTALLY RB
HORMATS NNP
HORMONE NN
HORMONES NNS
HORMONE-TREATED JJ
HORNADAY NNP
HORNE NNP
Hornets NNPS
HORNETS NNPS
HORN NN NNP
HORNS NNS
HORNUNG NNP
HOROSCOPES NNS
HOROWITZ NNP
HORRENDOUS JJ
HORRIBLE JJ
HORRIBLES NNS
HORRIFIC JJ
horrifying JJ
HORRIFYING JJ
HORROR NN
HORRORS NNS
horse-breeding NN
HORSE-BREEDING NN
HORSEHEAD NNP
Horseman NN
HORSEMAN NN
HORSE NN NNP
HORSEPOWER NN
Horses NNS
HORSES NNS
HORSHAM NNP
HORTA NNP
horticultural JJ
HORTICULTURAL JJ NNP
HORTICULTURALLY RB
horticultural-products NNS
HORTICULTURAL-PRODUCTS NNS
HORTICULTURE NN
HORTICULTURIST NN
HORTON NNP
HORWITZ NNP
HOSANNAS NNS
HOSE NN
Hoses NNS
HOSES NNS VBZ
hoses VBZ NNS
HOSOKAWA NNP
HOSPITABLE JJ
HOSPITALITY NN
HOSPITALIZATION NN
HOSPITALIZATIONS NNS
hospitalized VBN
HOSPITALIZED VBN
HOSPITAL NN NNP
Hospital NNP NN
Hospitals NNS NNPS
HOSPITALS NNS NNPS
HOSTAGE NN
HOSTAGES NNS
hosted VBD
HOSTED VBD
HOSTESS NNP
Hostile JJ
hostile JJ NN
HOSTILE JJ NN
HOSTILITIES NNS
HOSTILITY NN
HOSTING VBG
Host NN NNP
host NN VB
HOST NN VB NNP
hosts NNS VBZ
HOSTS NNS VBZ
HOT-AIR JJ
hot-cereals NNS
HOT-CEREALS NNS
HOT-COLD JJ
HOT-DIPPED JJ
HOT-DOG JJ
HOTDOG NN
hotel-casino NN
Hotel-casino NN
HOTEL-CASINO NN
HOTEL\/CASINO NN
hotel-casinos NNS
HOTEL-CASINOS NNS
HOTELIERS NNS
HOTEL NN NNP
Hotel NNP NN
hotel-restaurant NN
HOTEL-RESTAURANT NN
Hotels NNPS NNP
HOTELS NNS NNPS NNP
hot JJ
HOT JJ NNP
hot-line NN
HOT-LINE NN
HOTLINE NNP
HOTLINES NNS
HOTLY RB
Hot NNP JJ
HOT NNP JJ
HOT-ROLLED JJ
HOT-TEMPERED JJ
hottest JJS
HOTTEST JJS
HOUGHTON NNP
HOULIAN NNP
hounded VBD
HOUNDED VBD
HOUNDING VBG
hourlong JJ
HOUR-LONG JJ
HOURLONG JJ
hourly JJ
HOURLY JJ
HOUR NN
Hours NNS
HOURS NNS
housecleaning NN
HOUSECLEANING NN
housed VBN
HOUSED VBN
househld JJ
HOUSEHLD JJ
household NN JJ
HOUSEHOLD NN JJ NNP
HOUSEHOLDS NNS
HOUSEKEEPER NN
housekeeping NN
HOUSEKEEPING NN
HOUSEMAN NN
House NNP NN
HOUSE NNP NN VB VBP
house NN VB VBP
HOUSE-PAINTING JJ
House-passed JJ
HOUSE-PASSED JJ
House-Senate NNP JJ
HOUSE-SENATE NNP JJ
houses NNS VBZ
HOUSES NNS VBZ
Housewares NNPS
HOUSEWARES NNS NNPS
HOUSEWIFE NN
HOUSEWIVES NNS
HOUSEWORK NN
HOUSING-ASSISTANCE JJ
housing-construction NN
HOUSING-CONSTRUCTION NN
housing-discrimination NN
HOUSING-DISCRIMINATION NN
housing-loan NN
HOUSING-LOAN NN
housing NN
HOUSING NN NNP
Housing NNP NN
Housings NNS
HOUSINGS NNS
Houston-based JJ
HOUSTON-BASED JJ
HOUSTON-CALGARY NNP
HOUSTON-MONTGOMERY NNP
Houston NNP JJ
HOUSTON NNP JJ
hovered VBD VBN
HOVERED VBD VBN
HOVERING VBG
HOVNANIAN NNP
Howard NNP RP
HOWARD NNP RP
howdy UH
HOWDY UH
HOWELL NNP
HOWE NNP
however RB WRB
However RB WRB
HOWEVER RB WRB
HOWICK NNP
HOWIE NNP
HOWITZER NN
HOWLEY NNP
HOWLING VBG
HOWL NN
HOWSON-ALGRAPHY NNP
HOW-TO JJ
how WRB
How WRB
HOW WRB
HOYLAKE NNP
HOY NNP
HOYT NNP
H-P NNP
HP NNP
HRH NNP
H.R. NNP
H&R NNP
HSU NNP
HUALIEN NNP
HUAQIONG NNP
HUARD NNP
HUB-AND-SPOKE JJ
HUBBARD NNP
HUBBELL NNP
HUBBLE NNP
HUBEL NNP
HUBER NNP
HUBERT NNP
HUB NN NNP
HUCKSTERING VBG
HUDBAY NNP
huddled VBD
HUDDLED VBD
HUD NNP
HUDNUT NNP
Hudson NNP NN
HUDSON NNP NN
HUEGLIN NNP
HUERTA NNP
HUFF NNP
huge JJ
Huge JJ
HUGE JJ
Hugely RB
HUGELY RB
hugged VBD
HUGGED VBD
Huggies NNPS
HUGGIES NNPS
hugging VBG NN
HUGGING VBG NN
HUGGINS NNP
HUGHES NNP
HUGHEY NNP
HUGH NNP
HUG NN
HUGO NNP
HUGO'S NNP
HUGS NNS
HUH NNP
HULINGS NNP
HULKING VBG
HULK NN
HULLABALOO NN
HUMANA NNP
HUMAN-BASED JJ
humaneness NN
HUMANENESS NN
HUMAN-GENERATED JJ
HUMANISM NN
humanist JJ
HUMANIST JJ
humanitarian JJ
HUMANITARIAN JJ
HUMANITIES NNS
HUMANITY NN
HUMANIZING VBG
human JJ NN
HUMAN JJ NNP NN
Human NNP JJ
human-resources NNS
HUMAN-RESOURCES NNS
human-rights JJ NNS NN
HUMAN-RIGHTS JJ NNS NN
HUMANS NNS
HUMAN-SOUNDING JJ
humbled VBN
HUMBLED VBN
HUMBLE JJ
humid JJ
HUMID JJ
humiliating JJ
HUMILIATING JJ
HUMILIATION NN
HUMILITY NN NNP
HUMMERSTONE NNP
HUMONGOUS JJ
HUMORIST NN
HUMOR NN
HUMP-BACKED JJ
HUMPHREY NNP
HUMPHREYS NNP
HUMPHRIES NNP
HUMP NNP
HUMPTY NNP
HUMULIN NNP
hum VB NN
HUM VB NN
hunched VBN
HUNCHED VBN
HUNCH NN
hundred CD
HUNDRED CD NNP
Hundreds NNS NNP
HUNDREDS NNS NNP
HUNDREDS-OF-BILLIONS-OF-YEN JJ
hundredth JJ
HUNDREDTH JJ
HUNDRED-THOUSAND-SHARE JJ
HUNDREDWEIGHT NN
Hungarian JJ NNP
HUNGARIAN JJ NNP
Hungarians NNPS
HUNGARIANS NNPS
Hungary NNP JJ
HUNGARY NNP JJ
HUNGERFORDS NNP
HUNGER NN
hungry JJ
HUNGRY JJ
hung VBD VBN JJ
HUNG VBD VBN JJ NNP
hunker VB
HUNKER VB
HUNK NN
HUNKY-DORY JJ
HUN NNP
HU NNP
hunted VBN
HUNTED VBN
HUNTERDON NNP
hunter-gatherers NNS
HUNTER-GATHERERS NNS
HUNTER NNP NN
HUNTERS NNS
HUNTING NN
hunting NN VBG
HUNTING NN VBG
HUNTINGTON NNP
HUNTLEY-BRINKLEY NNP
HUNTLEY NNP
HUNT NNP NN VBP VB
hunt NN VB VBP
HUNTSMAN NNP
hunts VBZ
HUNTS VBZ
HUNTSVILLE NNP
HUNTZ NNP
HUPPERT NNP
HURDLE NN
HURDLES NNS
HURD NNP
HURICANE NNP
hurled VBN
HURLED VBN
HURLEY NNP
HURLING VBG
hurl VBP
HURL VBP
HURRICANE-HIT JJ
Hurricane NNP NN
HURRICANE NNP NN
Hurricanes NNPS
HURRICANES NNS NNPS
HURRICANE-STRICKEN JJ
HURRICANE-WRACKED JJ
HURRICAN NNP
hurried JJ VBN
HURRIED JJ VBN
HURRIEDLY RB
hurries VBZ
HURRIES VBZ
hurry NN VB
HURRY NN VB
HURST NNP
HURTADO NNP
HURTER NNP
HURTING VBG
HURTLING VBG
hurts VBZ
Hurts VBZ
HURTS VBZ
hurt VBN VB VBD VBP NN JJ
HURT VBN VB VBD VBP NN JJ
HURWITT NNP
HURWITZ NNP
HUSBAND NN
HUSBANDS NNS
HUSH-HUSH JJ
hush JJ
HUSH JJ
HUSKER NNP
Huskers NNPS
HUSKERS NNPS
HUSK NN
husky JJ
HUSKY JJ NNP
HUSSMAN NNP
HUSTEAD NNP
hustings NN
HUSTINGS NN
HUSTLERS NNS
hustles VBZ
HUSTLES VBZ
HUTCHINSON NNP
HUTCHISON NNP
HUT NNP
HUTTON NNP
HUXTABLE NNP
HUY NNP
HWANG NNP
HYALURONIC JJ
HYATT NNP
hybrid JJ NN
HYBRID JJ NN
HYBRIDS NNS
HYBRITECH NNP
HYDE NNP
Hyde-to-Jekyll JJ
HYDE-TO-JEKYLL JJ
HYDRAULICALLY RB
HYDRAULIC JJ
HYDROCARBON NN
HYDROELECTRIC JJ
HYDROGEN NN
HYDRO NNP
HYDRO-QUEBEC NNP
HYENAS NNS
HYGIENE NN NNP
HYMAN NNP
HYMOWITZ NNP
HYPED NN VBD
hyped VBD NN
HYPE NN
HYPERACTIVE JJ
HYPERCARD NNP
HYPER-COMPETITIVE JJ
HYPERINFLATION NN
hyper JJ
HYPER JJ
HYPERMARKET NN
HYPERMARKETS NNS
HYPERTENSION NN
hyper-trader NN
HYPER-TRADER NN
hyperventilating NN
HYPERVENTILATING NN
hyping NN VBG
HYPING NN VBG
HYPNOTIC JJ
hypnotized VBN
HYPNOTIZED VBN
HYPOCRISY NN
HYPOCRITES NNS
HYPOGLYCEMIA NN
HYPOGLYCEMIC JJ
HYPOTHEEKKAS NNP
hypothesized VBN
HYPOTHESIZED VBN
HYPOTHETICAL JJ
HYSTERIA NN
HYSTERICAL JJ
HYSTERICALLY RB
HYUNDAI NNP
i860 NN
I860 NN
I-880 NN NNP
I-880 NNP NN
IACIOFANO NNP
IACOCCA NNP
IAFP NNP
IAMBIC JJ
IAN NNP
IATA NNP
IBBOTSON NNP
IBC\/Donoghue NNP NN
IBC\/DONOGHUE NNP NN
IBC NNP
IBERIAN NNP
IBEW NNP
IBJ NNP
IBM-compatible JJ
IBM-COMPATIBLE JJ
I.B.M. NNP
IBM NNP
IBM-oriented JJ
IBM-ORIENTED JJ
IBM\/PC NNP
IBM-remarketer JJ
IBM-REMARKETER JJ
ICAHN NNP
ICAHNS NNP
ice-baggers NNS
ICE-BAGGERS NNS
ICEBERG NN
ICE-BREAKER JJ
ice-core NN
ICE-CORE NN
ICED JJ
iced-tea NN
ICED-TEA NN
ICELAND NNP
ICE NN NNP
ICHIRO NNP
I.C.H. NNP
ICI NNP
ICM NNP
ICON NN
ICONOCLASTIC JJ
Idaho-based JJ
IDAHO-BASED JJ
IDAHO NNP
IDA NNP
IDEALISM NN
IDEALISTIC JJ
IDEALIST NN
IDEALIZED JJ
ideal JJ NN
Ideally RB
IDEALLY RB
IDEAL NNP JJ NN
Ideal NNP NN
IDEALS NNS
IDEA NN
Ideas NNS
IDEAS NNS
IDENTICAL JJ
IDENTIFIABLE JJ
IDENTIFICATION NN
identified VBN VBD
IDENTIFIED VBN VBD
identifies VBZ
IDENTIFIES VBZ
IDENTIFYING VBG
identify VB VBP
IDENTIFY VB VBP
IDENTITIES NNS
identity-management NN
IDENTITY-MANAGEMENT NN
IDENTITY NN
IDEOLOGICAL JJ
IDEOLOGIES NNS
IDEOLOGIST NN
Ideologues NNS
IDEOLOGUES NNS
IDEOLOGY NN
IDIOCY NN
IDIOMATIC JJ
IDIOSYNCRATIC JJ
IDIOTS NNS
IDLED VBD VBN
idled VBN VBD
Idle JJ
idle JJ VB
IDLE JJ VB
IDLING NN VBG
idling VBG NN
Id NN
ID NN
IDOSYNCRATIC JJ
IDRIS NNP
IDRISSA NNP
IDROCARBURI NNP
IDS NNP
i.e. FW
I.E. FW
I.E.P. NNP
IFAR NNP
iffy JJ
IFFY JJ
If IN
IF IN
if IN JJ
IF IN JJ
IFI NNP
IFINT NNP
IGARAS NNP
IGDALOFF NNP
IGNACIO NNP
IGNATIUS NNP
IGNAZIO NNP
IGNITED VBD VBN
ignited VBN VBD
ignite VB
IGNITE VB
IGNITION NN
IG NNP
IGNOBLE JJ
IGNOMINIOUSLY RB
ignoramus NN
IGNORAMUS NN
IGNORANCE NN
ignored VBN VBD
IGNORED VBN VBD
ignores VBZ
IGNORES VBZ
Ignore VB
ignore VB VBP
IGNORE VB VBP
Ignoring VBG
IGNORING VBG
[truncated: 446,934 more chars]
