# Supplementary material for: ScholarLens: extracting competences from research publications for the automatic generation of semantic user profiles
Source: PeerJ journal article supplement (doi:10.7717/peerj-cs.121), 2017-07-03
Supplement: Pipeline.zip [file Pipeline.zip › Pipeline/gate/plugins/ANNIE/resources/heptag/lexicon_cap]

10:08 CD
MINIVANS NNS
FLEXIBILITY NN
BREZHNEVITE NNP
SPENT VBD VBN JJ
MULTI-MILLION JJ
CORONETS NNPS
CONTIGUOUS JJ
MIDDLE-OF-THE-ROAD JJ
HONDURANS NNS
BANKWATCH NNP
24,891 CD
IGNOMINIOUSLY RB
HEADLINE NN NNP
PAYCHECKS NNS
10:10 CD
JUGEND NNP
ELLESMERE NNP
LANTANA NN
POLICYMAKER NN
LIMITED-EDITION JJ
BLANKET NN VBP NN|JJ
10:15 CD
! .
CREDIT-REPORTING JJ
KOROTICH NNP
# #
$ $
% NN JJ
& CC SYM
' POS '' :
( (
AMBASE NNP
) )
WOONG NNP
SCRUBBERS NNS
DIAZEPAM NN
RIFENBURGH NNP
57.2 CD
, ,
MICROWAVE NN NNP
- :
– :
57.4 CD
. .
57.5 CD
57.6 CD
0 CD
57.7 CD
1 CD LS
SCRIPTWRITER NN
57.8 CD
2 CD LS ,
57.9 CD
3 CD LS NNP
MORINO NNP
4 CD LS
TWINS NNP
5 CD LS
6 CD
7 CD
8 CD
9 CD
SPEEDED VBD
: :
APLOMB NN
; :
HEYDEN NN NNP
= SYM
? .
@ SYM IN
A DT NNP SYM NN FW JJ LS IN
CAPITAL-MARKETS JJ
B NNP SYM NN LS
10:25 CD
HOURLY JJ
RALSTON NNP
C NNP SYM NN $ LS
D NNP SYM LS
E SYM NN NNP LS
F SYM NN NNP LS
G NNP SYM
H NNP NN
SATURATE VB
I PRP NN NNP CD FW NNS
J NNP
REPRESENTS VBZ
K NNP NN
L NNP NN
M NNP
N NNP
1,878-PAGE JJ
ITERATION NN
P NN
DANGER NN
Q NNP
R NN SYM NNP LS
ELUDED VBD
S NNP VBZ PRP
T NN
U NNP
V NNP
SOLITARY JJ
W NNP
X NNP SYM NN LS
Y NNP NN
Z NNP SYM NN
GARCIAS NNPS
HARSHLY RB
LINEAR NNP JJ
10:30 CD
INDUCEMENTS NNS
POLICY-MAKERS NNS
LIGHTWEIGHT JJ
` ``
GENOVA NNP
10:33 CD
JINXED VBN
FUNCTIONING VBG NN
GENE-COPYING JJ
BARNUM NNP
HEMORRHAGED VBN
287,209 CD
DISADVANTAGED JJ
FAINTING NN VBG
MEMORANDA NNS
HYPE NN
FEVER NN
{ (
CAPITAL-TO-ASSET NN JJ
} )
VENEZUELAN JJ
DISADVANTAGES NNS
10:40 CD
981.2 CD
10:45 CD
1.3210 CD
EDDY NNP
SPERM NN
981.7 CD
WASHINGTON-BASED JJ
724,579 CD
GET-TOGETHER NN
IMPACTS NNS
HAZARDOUS JJ
SOFTDRINK NN
PYRAMIDING VBG
83-YEAR-OLD JJ
EDEN NNP
PRESSURED JJ VBN VBD NN
OVERWHELMED VBD VBN JJ
OVERSUBSCRIBED VBN JJ
VANGUARDIA NNP
35486.38 CD
IMPOSING VBG JJ
FIGURED VBD VBN
BROADCASTS NNS VBZ
DIAPERS NNS
DELIVERING VBG
FARMSTEADS NNS
CONDONED VBD
PRESSURES NNS
MAYNARD NNP
C-WORD NN
SASEA NNP
INCREDULOUS JJ
CAREEN VB
REMIC NNP JJ
BIRNBAUM NNP
DERRIERE NN
CAREER NN NNP
FIGURES NNS VBZ
PAMPHLETEER NN
EXCRUTIATINGLY RB
KINDERGARTEN NN
TOY-MAKING JJ
SCORE-WISE JJ
INDUSTRIALISTS NNS
ERYTHROPOIETIN NN
BELIED VBD
CLUBBING VBG
HIGH-TONED JJ
BELIEF NN
WALLET NN
BIG-SOULED JJ
CARETAKER NN
BELIER NNP
EDGE NN VB NNP
PISZCZALSKI NNP
GLITCH NN
TWIST NN VBP
FEARING VBG
DROGOUL NNP
WINTON NNP
SONY\/COLUMBIA NNP
MILANO NNP
27-POINT JJ
AZTAR NNP
DROUGHT-RAVAGED JJ
FASCINATING JJ
EDGY JJ
NOBILITY NN
DIVED VBD
MORITA NNP
COMFORTABLE JJ
HISPANIC JJ NNP
D.C.-BASED JJ
AVERAGING VBG NN
ANTI-ABORTION JJ NN
BIG-RISK JJ
SEVERABLE JJ
BLACK-DRAPED JJ
KOFCOH NNP
DIVES VBZ
LIMITED-PRODUCTION JJ
VITRO-ANCHOR NNP
TRIVELPIECE NNP
SETTING VBG NN
SLUGGISHNESS NN
COMFORTABLY RB
ONE-SENTENCE JJ
MORITZ NNP
TROTTED VBD VBN
NEWMAN NNP
LAWMAKERS NNS NNPS
PLAQUE NN
EXPERIENCED VBN JJ VBD
BURNHAM NNP
FASCINATION NN
SASHA NNP
DOOLITTLE NNP
MOBILIZATION NN
EMIGRATED VBD
TAMPA NNP
TROTTER NNP
INQUIRING VBG
EXPERIENCES NNS VBZ
MILLKENS NNP
VESSELS NNS
EDIT VB
DIVERSIONS NNS
KETTLE NN
DIALOGUE NN
SUPERSTITIONS NNPS
STOLTZMAN NNP
SNEZAK NNP
CORPORATE-FINANCE JJ NN
HAVOC NN
60-DAY JJ
CROSS-LICENSING NN
NICIPORUK NNP
48-YEAR-OLD JJ
TUMOR-SUPPRESSORS NNS
FUNNELING VBG
ONCE-SPORADIC JJ
EXCORCIATE VB
TRANSPLANT NN VB NNP
MIXED-UP JJ
RECREATE VB
ARAFAT NNP
SWOON NN
SUMMARIZING VBG
AZTEC JJ
SWOOP NN
WETZEL NNP
LEFTIST JJ
40-POINT JJ
FORTIFIED VBN
HELLER NNP
713.5 CD
1\/2-MILE JJ
IMPLYING VBG
SNIVELING VBG
TIRELESSLY RB
CAPITALS NNS
FLOPPY-DISK NN
MOONACHIE NNP
MERGED VBD VBN JJ
GABRIELA NNP
DARTMOUTH NNP
SENSITIVE JJ
REDISTRICTING NN
GABRIELE NNP
FERVENTE NNP
LEGALISTIC JJ
RATE-MORTGAGES NN
MERGER NN NNP
PICTURE-TAKING NN
ENVIRONMENTALLY RB
CROSS-FUNCTIONAL JJ
DRINKS NNS
DOVETAILS VBZ
CONSCIOUSNESS NN
LAVISHED VBN
ARIZ.-BASED JJ
PROBING VBG
IMPEDE VB
AGGRESSIVELY RB
KWANG NNP
MIDDLE-MANAGEMENT JJ
MENTION VB NN VBP
CURSING NN
INTERMEDIATE NNP JJ
ART-WORLD NN
EFFUSIVE JJ
CLAUSE NN
137,550,000 CD
DRUGSTORE NN
ATONAL JJ
METALL NNP
2.8896 CD
SHALES NNP
ROLLERCOASTER JJ
633.8 CD
LIQUIDATED VBN VBD
METALS NNS NNP NNPS
SYMMETRY NN
CHEATED VBD JJ
SWORD NN
IMPOVERISHED JJ VBN
SWORE VBD
HERMITAGE NNP
EGA-VGA JJ
SWORN VBN JJ
INEPTITUDE NN
CHEATER NN
WALSIFER NNP
MERGERS-AND-ACQUISITIONS JJ
EARTHQUAKE-PROOF JJ
UZBEKISTAN NNP
RALLYING VBG NN
MATHILDE NNP
OUTNUMBERED VBD
PERRITT NNP
WHEELING-PITTSBURGH NNP
HARD-CHARGING NN JJ
SPECTACLE NN
DISBURSEMENT NN
JUMBO JJ
CLIENT-SERVICE JJ
UNOFFICIAL JJ
EFFORTLESSLY RB
INEVITABLE JJ
SUNNYVALE NNP
JOSEPH NNP
WHITE-WASHED JJ
CHILMARK NNP
LOW-TAX NN
SHERMAN NNP
BRANNON NNP
LOAN-MANAGEMENT NN
ABSTRACT JJ
INEVITABLY RB
CYCADS NNS
WITHING IN
BREAST-CANCER NN
MCGILLICUDDY NNP
COCKTAILS NNS
SENSITIZE VB
SOCIALISTS NNPS NNS
MCKINSEY NNP
ANTINORI NNP
RECENTLY RB
AFFORDABLE JJ NNP
WALDHEIM NNP
GIBBERISH NN
WALLOP NNP
NATIONALIZATION NN
DETECTING VBG
MISROUTED VBN
IMPLICATED VBN
LONG-PLANNED JJ
COLD-WEATHER JJ
OVERLY RB
SUPER-RICH JJ
BISMARCKIAN JJ
473.9 CD
NAVIES NNS
CAPITALISM NN
CONGDON NNP
STACKS NNS
PIMPS NNS
SCHOOL-IMPROVEMENT JJ
NORTH-SOUTH JJ
UREA NN
LONGED-FOR JJ
CAPITALIST JJ NN
JAKES NNP
FIGHTING VBG NN NNP
PUENTE NNP
WORKAHOLIC JJ NN
750,000 CD
ENTRIES NNS
FOREGROUND NN
HOWITZER NN
VISHWANATH NNP
HYMAN NNP
CONNECTORS NNPS
RAUCOUS JJ
PRICKED VBN
JUXTAPOSE VBP
OUTSELLING VBG
BOATLOAD NN
CONTROVERSIAL JJ
OUT-OF-SYNCH JJ
RAMROD-STIFF JJ
PEACEMAKER NN
DOMINANCE NN
DISPERSANTS NNS
CELLULOIDS NNS
EXCEL NNP VB VBP
BLANDINGS NNP NNS NNPS
94,243 CD
PRIVATIZATION NN NNP
SPEEDUP NN
SEPTUAGENARIAN NN
KONINKLIJKE NNP
BIOPHYSICIST NN
PINCHED VBN VBD
DEFICIENCIES NNS
COMMERCIAL-SWITCH JJ
393.1 CD
393.4 CD
DDG-51 NNP
UNRELIABLE JJ
INDEFINITELY RB
BEMUSED JJ
619.8 CD
SPICES NNS
ASTRINGENCY NN
SCORSESE NNP
PROBITY NN
SALARYMEN NNS
CEMENT-MAKERS NNS
GIVAUDAN NNP
POSTWAR JJ
COIFFED JJ
TOPICS NNS
URGE VB NN VBP
GRIEVANCE NN
THEN-CITY JJ
NINE-DAY JJ
LIFESIZE JJ
VISUALIZE VB
CONTRACTING NN VBG
EMPOWERING VBG
WHISTLE VBP
EXHAUSTING JJ VBG
LOSER NN JJ
LOSES VBZ NNS
LAVISHLY RB
LINERS NNS
GRIEF NN
16.125 CD
REDRAWN JJ
SASSY NNP JJ
EVIAN NNP
1971-1974 CD
14\/32 CD
HARRAH NNP
STUDYING VBG
THINK-TANK NN
OPENERS NNS
SOULMATES NNS
COROLLAS NNPS
LEMANS NNP
539.4 CD
CONTRACTION NN
DRIVE-TRAIN NN
NAMELY RB
EXHAUSTION NN
ENTOURAGE NN
UNTREATED JJ
179.916 CD
VALVES NNS
TRUFFAUT NNP
BROPHY NNP
4,500 CD
SCARCELY RB
1205.01 CD
HAINES NNP
SPARTAN NNP JJ
FEASIBLE JJ
HELFMAN NNP
MOLLIFY VB
TIME-SHARES NNS
EASTMAN NNP
LEVELS NNS
SCATHING JJ
MAGISTRATE NN
STERILIZING VBG
LESSER-DEVELOPED-COUNTRY JJ
CONTROVERSIES NNS
CHAFE VBP
STEIDTMANN NNP
ILLEGITIMATE JJ
HALF-SHARE NN
MULTIYEAR JJ
1205.19 CD
PRINCIPAL JJ NN NN|JJ
SHALOM FW
BUDGETARY JJ
EVOLVING VBG
BRIDESHEAD NNP
STRASBOURG NNP
RECIPROCITY NN
LINEUP NN
SHALOV NNP
ORLANDO NNP
LESS-EXPERIENCED JJ
REKINDLED VBN
CERTIFY VB
SANTIAGO NNP
205.3 CD
LIQUIDATOR NN
AMALGAMATIONS NNS
EXPLOSION NN
858,000 CD
PREVIEW NN
BOTHERING VBG
JAPANESE-STYLE JJ
CAREWS NNPS
UNOBTRUSIVE JJ
CAPITALIZE VB
RAYON NNP NN
OBSERVATION NN
SKANSKA NNP
HEARTBEAT NN
HIGHLANDS NNS
55-YEAR-OLD JJ NN
CUCUMBER NN
BAKERS NNS
VIRGINIA NNP
TRAVIATA NNP
DETECTIVE NN
BAKERY NN NNP
AMAZONIAN JJ
WEBSTER\/EAGLE NNP
ACRYLIC NNP
AP600 NN
INTERNATIONAL-OPERATIONS NNS
SEMBLANCE NN
FAILURE-TO-SUPERVISE JJ
FUSING NN
INVESTCORP NNP
ABSENCE NN
APMS NNP
WELL-TAILORED JJ
DOLLAR-YEN JJ
125.1 CD
BURTON NNP
125.7 CD
PRICKLY JJ
3.526 CD
DRAWINGS NNS
30-YEAR JJ CD
MIZUNO NNP
CHAIN NN VBP
523,920,214 CD
FATALITIES NNS
CHAIR NN
DISCOMFITED JJ
VIOLATING VBG
SEPARATING VBG
NEWPORT NNP
SALVATORE NNP
FUSION NN
PASSING VBG NN
EVASION NN
SALVATORI NNP
DIPPED VBD VBN
HURDLES NNS
IMASCO NNP
TIPHOOK NNP
4,555 CD
ALSTYNE NNP
PAST-DUE JJ
FERTILIZATION NN
INVOICING NN
DECLARATION NN NNP
PURGED VBN VBD
PREPARING VBG
BULLISHNESS NN
COPIAGUE NNP
WIRING NN
HOTEL-RESTAURANT NN
ONE-SIZE-FITS-ALL JJ
GOSSIPING VBG
VIOLATION NN
SEPARATION NN
PURGES VBZ
PHYSIOLOGY NNP
POOLING VBG
GRILL VBP NNP
DELOITTE NNP
PASSION NN
CATAPULT VB VBP
WORRYING VBG JJ
TRANSPORTABLE JJ
WELL-PLANNED JJ
GRAINS NNS NNPS
EXHAUSTIVE JJ
HOUSED VBN
22,750,000 CD
14,560,000 CD
UNDERSEAS NNP
SPENDTHRIFT NNP
PREFERRED-DIVIDEND JJ
16,746 CD
UNTHINKABLE JJ
TAP-TAP NN
HOUSES NNS VBZ
SCARCEST JJS
ANGLES NNS
GRIMM NNP NN
ABORTION-RIGHTS NNS JJ
RULERS NNS
LUMPIER JJR
HEADLINED VBN VBD
CHALK NN
BASELINE NN JJ
ATLANTA NNP
PARAGON NNP
HARRIS NNP
72.2 CD
W.VA. NNP
72.3 CD
DEFICITS NNS
72.4 CD
LONGER-TERM JJ JJR
72.5 CD
HEADLINES NNS
72.6 CD
FULFILL VB VBP
FASTENAL NNP
72.7 CD
JUMPS NNS VBZ
2129.4 CD
KANGAROO NN NNP
GRIND VB
ADJUSTED VBN JJ VBD
JUMPY JJ
STOWED VBD
HEAVIEST JJS
ADMIRAL NN
THINNING VBG
CONTINENTAL NNP JJ
AFFABLE JJ
JACLYN NNP
ELECTROLYSIS NN
ADJUSTER NN
REIMBURSEMENT NN
GRINS NNS
INCREMENT NN
CONSTITUTIONALLY RB
BARONS NNS
LASORDA NNP
PRO-CHOICE JJ
CHAMP NN NNP
OFFSHORE-RIG NN
ASTEROIDS NNS
EYEWITNESS NN
QUEENS NNP
ABBETT NNP
486.30 CD
494.50 CD
SUSPECTS VBZ NNS
HUNCHED VBN
EXPLOSIVE JJ
TANDY NNP VB
TRADITIONS NNS
FROGS NNS
PRODDED VBN
LOUGHLIN NNP
GLITZY JJ NN
REAR-SEAT NN
INTERLOPER NN
BUZZWORD NN
BARGAINS NNS
CHANS NNS
PROPRIETY NN
FRYING VBG
WEIGHTED JJ VBN
ZIPPO NN
RENAL JJ
DISTRIBUTIONS NNS
MARSHALL NNP
OCEAN-SHIPPING NN
LUBAR NNP
SYSTEMS NNS NNP NNPS
478.28 CD
SEPARATIST JJ
MUDSLINGING NN
BOX-OFFICE NN
BOLOGNA NNP
MARQUEES NNS
REINFORCEMENTS NNS
MILE-LONG JJ
UNOFFICIALLY RB
GRIPS NNS
DULLNESS NN
ANGLIA NNP
CHAOS NN NNP
BLEEDING VBG NN
BOMBING NN
STEELMAKERS NNS
CASCADE NNP NN
PCBS NNS
KHOST NNP
FASTENED VBN
CHAPS NNS
TERMINALS NNS
JUNCTURE NN
ROCKETED VBD
GROUNDWATER NNP
MANNERS NNS
HONISS NNP
ADMIRED VBN VBD
ATTENDANCE NN
O'SHEA NNP
FASTENER NN
O'LOUGHLIN NNP
TANGO NNP
AHMAD NNP
LANDFALL NN
LAZARUS NNP
FRASER NNP
ADMIRER NN
ADMIRES VBZ
PRINCIPLE NN
LESS-SWEEPING JJ
2,157,656 CD
MICHELIN NNP
ALAMO NNP
SERVICE-SECTOR JJ
SIMONDS-GOODING NNP
HEAVY-TRUCK NN
SIGNIFICANTLY RB
QUEERS NNS
HUMILIATING JJ
PASSIVE JJ NN NNP
486.74 CD
SECAUCUS NNP
24,999 CD
INSULT NN VB
GREENERY NNP
EMERY NNP
BROKER-SOLD JJ
PARSONS NNP
BIOSCIENCES NNP NNPS
ASKED VBD VBN JJ
SIXTIES NNS
D'EXPLOITATION NNP
CHARM NN
CHARACTERIZATION NN
PERSONAL-INCOME JJ
TACKLING VBG
58.2 CD
APPROACH NN VBP VB
58.3 CD
RENEE NNP
VOLLAND NNP
OLD-HOUSE NNP
PREDAWN JJ
MOST-RECENT JJ JJS
58.6 CD
CHART NN VB VBP
58.7 CD
58.8 CD
58.9 CD
TANII NNP
CHARY JJ
KNUDSEN NNP
LUBER NNP
PRIVATIZE VB
SCHROEDER NNP
AHLERICH NNP
RENEW VB
PRESERVATION NN
HUMILIATION NN
TAILSPIN NN
CHASE NNP NN VB JJ
60,000-ODD JJ
SCALFARO NNP
SELF-PORTRAIT NN
PEPSI-COLA NNP
ASSISTANCE NN
BLANKETS NNS
101.225 CD
TYPICALLY RB
CHARACTERISTICS NNS
DAMPENED VBD
CHIVAS NNP
LEINBERGER NNP
D'ULISSE FW
MULTIPART JJ
MICHELLE NNP NN
DEFRAUDED VBD VBN
FRITTERED VBN
WHIRLWINDS NNS
371.20 CD
COLUMBIA NNP
CHIMICLES NNP
PINCH NN VB
FILM-PROCESSING NN
LIEBER NNP
8.1255 CD
INDUSTRIELLE NNP
RECTANGLE NN
WEEKENDS NNS
INTOXICATION NN
FEWER JJR RBR
SCAMMERS NNS
OBTAINING VBG
SNEAKERS NNS
LUMPING VBG
TANKS NNS
DO-EVERYTHING JJ
OVERDRESSED JJ
MIDDLE-AGE JJ
FRONT NN JJ NNP RB
FILIAL JJ
2003-2005 CD
UNEQUAL JJ
5,000-ROOM JJ
CAPITALIZATION NN
2003-2008 CD
SCAVENGER NN
DEMOTION NN
COUGAR NNP
OVERDOSED VBN
ALARM NN
HAWKE NNP
62-YEAR-OLD JJ
YARDWORK NN
ASKIN NNP
WARRIORS NNS
COMPREHENSION NN
WAR-LIKE JJ
ODDLY RB
HAWKS NNS NNPS
NICE JJ
EUPHEMISMS NNS
CAPABILITY NN
MICHELOB NNP
DENOMINATION NN
NICK NNP
SIGNALED VBD VBN
DESPAIR NN
TREASURY-MANAGEMENT NN
363.30 CD
HOT-TEMPERED JJ
ANTI-SOMOZA JJ
363.35 CD
DISK\/TREND NNP
INSURE VB VBP
PARAMEDICS NNS
MISLED VBD VBN
STYMIED VBN
HONOLULU-BASED JJ
PILIPINO NN
57TH NNP JJ
TERMINATE VB
TINKERING NN VBG
AROMATIQUES NNP
363.40 CD
'' ''
D'AMICO NNP
WHISPERS NNS
COIN-CLEANING JJ
MEDICAL-SUPPORT JJ
CULLEN\/FROST NNP
THREE-TO-FIVE-YEAR JJ
ALABAMA NNP
DEDUCTED VBN
COCKINESS NN
HABEAS NNS
SHEALY NNP
NIEM NNP
SUPERINTENDENTS NNS
'D MD VBD NNP
COURIERS NNS
ROBINS NNP
ABETTING VBG
SULLIVAN NNP
SWATHED VBN
INCOMPLETE JJ
347.13 CD
347.16 CD
'M VBP
'N NNP CC
'S POS VBZ PRP NNP NNS
ENERGY-SERVICES JJ NNS
2.8956 CD
DEFIANTLY RB
ROLLING-STEEL NN
LITHOGRAPHS NNS
DEGRADING JJ
SECTORIAL JJ
CONSOLATION NN
M.A. NNP
LITHOGRAPHY NN
GEOMETRICAL JJ
DRIED-OUT JJ
FROST NNP
PRINTOUTS NNS
81.50 CD
SATIN NN
DEPARTURES NNS
PEORIA NNP
LOAD NN VB
CUSHIONED VBN
FROTH NN VB
34,000 CD
KINDER-CARE NNP
WILDENSTEIN NNP
ELEANOR NNP
THREE-TO-FIVE-PAGE JJ
IMPRESSION NN
LOAN NN NNP VB
MULTISTATE NN
BRAITMAN NNP
MARCELLO NNP
SIGHTINGS NNS
EXPLODE VB
MANIFESTATION NN
BOUYGUES NNP NNS
27-YEAR-OLD JJ
REVAMPED VBN VBD
DC-10 NNP
PANNED VBD VBN
TWO-PARTY JJ
ORPHANS NNS
SCHENLEY NNP
SUPPLY-SIDE JJ NN
HELMET NN
GEYSERS NNS
UNCALLED JJ
DECORATION NN
MCLUHAN NNP
LOBO NNP
SILENT JJ NNP
LORTIE NNP
REINFORCED-FIBERGLASS JJ
INCONSISTENCIES NNS
SCHWARTZMAN NNP
APPEAL NN VB VBP
FOREFRONT NN
ENERGY-COGENERATION NN
ANTI-FLAG-BURNING JJ
APPEAR VB VBP
FENCING NN
HIRSCHFELD NNP
73.50 CD
PROBLEM-SOLVING JJ
KNUDSON NNP
MONET NNP
50,400 CD
STATE-LEVEL JJ
LITTLE-PUBLICIZED JJ
HUNTER-GATHERERS NNS
GOVERNMENT-SUBSIDIZED JJ
ANTI-INTELLECTUALISM NN
MONEY NN NNP
MUSCLE NN
COUGHS NNS
LOCK VB NN VBP JJ NNP
PINKY NNP
DISPROVE VB
M.D. NNP
LOCO NNP
UNJUSTLY RB
UNROLLS VBZ
PRICE-CONSCIOUS JJ
IDLING NN VBG
COMPREHENSIVE JJ NNP
WESTBOROUGH NNP
ENRIQUE NNP
COLOSSUS NN
CARDINAL NNP
UNFORTUNATELY RB
57.24 CD
STUFFY JJ
GRANDER JJR
585-LAWYER NN
ANNUALLY RB
USAA NNP
AVOIDANCE NN NNP
MOKABA NNP
LILLEY NNP
KILOMETER NN
PUMMELING NN
M.E. NNP
5,000 CD
FREE-LANCE JJ
RAZED VBN
REQUIEM NNP
ANNNOUNCEMENT NN
RICKEL NNP
-- :
RICKEN NNP
REROUTING VBG
HOFFMAN NNP
GOOSEBERRY NN
65.53 CD
LOEB NNP
NIKA NNP
RICKEY NNP
NIKE NNP
IN-HOUSE JJ RB NN
PRACTICE NN VB
INCHED VBD VBN
ESKRIDGE NNP
ERUPT VB
MANAGEMENT-PILOT NN
PROGRAM-MAKER NN
BUSINESS-TO-BUSINESS NN JJ
PARAGRAPH NN
CORNFIELD NN
SPUTTER VBP
OUTRANKS VBZ
HIGH-RANKING JJ
BABBLE NN
TOSHIMITSU NNP
KIDNEY-STONE NN
INCHES NNS
EEOC NNP
KAFKA NNP
MICROWAVES NNS
STEEL-MAKING JJ
NEARBY JJ RB
ASSIGN VB VBP
TADAHIKO NNP
REMEDY VB NN
GROUPEMENT NNP
NILE NNP
SPAGHETTI NNS NNP
CONTAINERBOARD NN
REFLECTED VBD VBN
1.1960 CD
DICHOTOMY NN
MACALLISTER NNP
300.1 CD
PRO-DEMOCRACY JJ
LOFT NN
EDITOR-IN-CHIEF NN
BESTED VBN VBD
SHINBUN NNP
Y'ALL PRP
TELLERS NNS
57.50 CD
WHISPERING VBG NN
COWARD NN
YORKSHIRE NNP
EXPLOIT VB VBP
FROZE VBD
DETAILS NNS NNP
IN-LAW NN
73.97 CD
232.12 CD
RHYMED VBD
COMPELLING JJ
COLUMBUS NNP NN
REPEALS VBZ
USDA NNP
JUAN NNP
LOGO NN
ATHENA NNP
RENDEZVOUS NN
LOGS VBZ NNS
DEFERRING VBG
LUMBERYARD NN
RHYMES VBZ
BOOM-AND-BUST JJ
HOPEFULLY RB NNP
RENTA NNP
474.1 CD
DERISIVELY RB
DEBTOR NN JJ
BAILED VBD
ATHENS NNP
NONCOMBATANT JJ
SHAMIR NNP
DONAHUE NNP
VARESE NNP
NINA NNP
IMPRESSIVE JJ
ARCANE JJ
VAUGHAN NNP
NINE CD
SUGARED JJ
GOLD-LEAF NN JJ
ENSEMBLE NN
RENTS NNS VBZ
NEARED VBD
CADDYSHACK NNP
POSING VBG
USED VBN VBD JJ
OMNIPRESENT JJ
EXPERIMENTS NNS
BAILEY NNP
ATTENDANTS NNS NNPS
CRISIS-MANAGEMENT NN
6,000-MEMBER JJ
FILING NN VBG
NON-PACKAGING JJ
NEARER IN
USER NN
PYSLLIUM NN
1. CD
USES VBZ NNS
CONTRASTS VBZ NNS
BALDWIN NNP
10 CD
11 CD NNP
LIBERTIES NNP NNPS NNS
FAST-FOOD NN JJ
12 CD
13 CD
14 CD
MISCEGENATION NN
DECORATIVE JJ
15 CD VBN
16 CD
17 CD
18 CD
BOWKER NNP
19 CD
ACCOUNTANT NN
M.J. NNP
MATERIALIZE VB VBP
EXECUTIVE-LEVEL JJ
NONCHLORINATED JJ
CHAPTERS NNS
USFL NNP
SUBTERFUGE NN
DIVISIVENESS NN
TRISTARS NNPS
SUBCONTRACTORS NNS
OLD-FASHIONED JJ
BUSINESS-TELEPHONE JJ
COSMIC JJ
394.4 CD
20 CD NNP
COMPUTER-INTEGRATED JJ
21 CD
57.82 CD
22 CD
23 CD
TANZI NNP
24 CD
SPIDER NNP
25 CD
MAFFEI NNP
JUDE NNP
26 CD
KUHNS NNP
57.87 CD
27 CD
28 CD
29 CD
CHATSET NNP
RICAN JJ NNP
REVIEW NN VB NNP VBP
WEAPONSMAKING NN
CHEERLEADER NN
GOLENBOCK NNP
140.1 CD
CONTEMPTUOUS JJ
AIRLINES NNPS NNP NNS
JUNGE NNP
HAPPENSTANCE NN
GAMBLER NN
JUDY NNP
LEAST-COST JJ
MENTAL JJ NNP
30 CD
31 CD
SCRIPTWRITERS NNS
32 CD
33 CD
34 CD
35 CD
36 CD
37 CD
NICKELODEON NNP
38 CD
SERKIN NNP
39 CD
LOWER-PRICED JJ
ASSISTANTS NNS
77,500 CD
TRISTATE JJ
UPSTREAM RB JJ
GRANDLY RB
USHA NNP
AROUSED VBN VBD
CRIME-BUSTING JJ
SASAKI NNP
3M NNP
GARMENTS NNS
REACHING VBG NN
AROUSES VBZ
RICCA NNP
40 CD
41 CD
42 CD
43 CD
SEESAW JJ NN
FACTORED JJ
44 CD
45 CD
46 CD
RECKONED VBN
47 CD
OBJECTIVITY NN
HELEN NNP
48 CD
HURTLING VBG
49 CD
PINTS NNS
ALREADY-TENSE JJ
14-HOUR JJ
ORIGINATORS NNS
OBTAINABLE JJ
USIA NNP
240.86 CD
BARCELONA-BASED JJ
HIROYUKI NNP
BACKPEDALING VBG
LIBRARY NN NNP
BURNING NN VBG
BAILIT NNP
FOOTING NN VBG
4,600 CD
OTROS NNP
APPRISED VBN
4.060 CD
WALLACE NNP
COST-CONSCIOUS JJ
WALLACH NNP
FACTOREX NNP
4.065 CD
SUPERCEDE VBP
CIVICS NNS
5,088 CD
HEADWAY NN
CROSSROADS NNS
50 CD
51 CD
52 CD
53 CD
DIESELS NNS
54 CD
LOMB NNP
55 CD
49.96 CD
JUGE NNP
56 CD
57 CD
58 CD
59 CD
SEMIANNUALLY RB
JUGS NNS
THOUGHTLESS JJ
LOUGHMAN NNP
JAGUAR-GM NNP
IRAN\/CONTRA NNP
APPELL NNP
HARSCO NNP
HELGA NNP
NATURAL-GAS-PIPELINE JJ
VEHICLE-SUSPENSION NN
STRATOSPHERE NN
60 CD NNP
RAILROAD-RATE JJ
61 CD
LOUTISH JJ
62 CD
63 CD
ONE-THIRD NN JJ RB
64 CD
WASTEFUL JJ
65 CD
ARCATA NNP
66 CD
67 CD
LONE NNP JJ
68 CD
69 CD
NITE NNP
LONG JJ RB NNP VBP
SURPASS VB VBP
FRIDAYS NNP NNS NNPS
PLYING VBG
JOB-CLASSIFICATION NN
EXACERBATE VB
216.49 CD
DOWNING NNP
HITTING VBG
SPLENDIDLY RB
PROLIFIC JJ
206.3 CD
PESSIMISM NN
REOPENS VBZ
FASHIONABLE JJ NN
UNSURPASSED JJ
PESSIMIST NN
DETECTED VBD VBN
BALLYHOOED VBN
AZURE JJ
70 CD
71 CD
72 CD
73 CD
74 CD
SUBMISSION NN
STOECKLIN NNP
75 CD
76 CD
RAZOR NN
MIRRORS VBZ
77 CD
200,000 CD
PAY-DOWN JJ
78 CD
79 CD
224.75 CD
SCALED-BACKED JJ
REPEATS VBZ NNS
MINDSET NN
LOOK VB VBP NN
CHERNOBYL-TYPE JJ
LOOM NNP VBP VB VBZ
APPEND VB
7A NN
7B NN
LOOP NN
LOOT VB NN
GRIDIRON NN
EXPLORE VB VBP
YOUNKERS NNP NNS
MUZZLING JJ
CLARINETIST NN
ANTIBODIES NNS
FILED VBN VBD
GOVERNMENT-OPERATED JJ
80 CD
GIDDINGS NNP
81 CD
82 CD
NEARLY RB
83 CD
84 CD
85 CD
NIVA NNP
86 CD
87 CD
88 CD
LASHED VBD
89 CD
34-YEAR-OLD JJ
ODD-LOT JJ
FILES NNS VBZ
OSBORN NNP
TRUSTCO NNP
COSMOS NNP
333,000 CD
COMBINING VBG
JUJO NNP
BISHOPS NNS
126.1 CD
MUZZLES VBZ
HELIX NN
COMMITTEES NNS VBZ
EARRINGS NNS
LOUIS-DREYFUS NNP
4-DEC. NNP
126.6 CD
3.625 CD
TWICE-YEARLY JJ
4,645 CD
FORLORN JJ
RETIREES NNS
FOUR-STAR JJ
COMPETENCE NN
ENTERED VBD VBN
CHEAPENS VBZ
9. CD
9-10 CD
GREIFSWALD NNP
9-11 CD
90 CD
DECOMMISSONED JJ
91 CD
RICHE JJ
92 CD
93 CD
94 CD
95 CD
96 CD
97 CD
REMODELED VBN
98 CD
99 CD
216.74 CD
COMPETENCY NN
LIQUID-NITROGEN NN
M.R. NNP
466,000 CD
REQUIRE VB VBP
GRINDERS NNS
VLASI NNP
TAMING VBG
HOARDS NNS
MONTE NNP
ACCEPTABLE JJ
CONSERVE VB
MONTH NN NNP
T-MAX NNP
TRUSTED VBD VBN
TRUSTEE NN
HELMUT NNP
BRAUEREI NNP
SAFEWAY NNP
MUNICH-BASED JJ
ADMONISHING VBG
LORD NNP
LORE NN
CORNERSTONE NN
COLAS NNS
TAPPING VBG
MOTELS NNS
DOUBLING VBG NN
LORI NNP
ASSIST VB VBP
AMMANN NNP
WARRING VBG
INSTINCTS NNS
DEFIED VBD
JULY NNP
BAKERIES NNS
EXPERIENCE NN VB VBP
PACKERS NNPS
AXA-MIDI NNP
JUNOR NNP
TREMULOUS JJ
DEFIES VBZ
LOSE VB VBP
HELLO UH
163,000 CD
HOMEFED NNP VBN
HELLS NNP
COLBY NNP
FAIRNESS NN NNP
JUMP NN VB VBP
NON-DUAL JJ
T-SHIRTS NNS
ENTERGY NNP
5,377,000 CD
HYPERMARKETS NNS
LOSS NN
VIRGINS NNS
MONEY-FUND NN
LOST VBD VBN JJ
SHOVELS NNS
GRILLED-CHICKEN JJ
WARRIOR NN NNP
CONASUPO NNP
APPERT NNP
SEIGE NN
SCIENCES NNPS NNP NNS
73.5 CD
ANKARA NNP
73.6 CD
73.8 CD
JUNE NNP
ELECTROLYTIC JJ
JUNG NNP
DIESEL NN JJ NNP
JUNK NN VB
DOTTING VBG
HELMS NNP
SAILORS NNS
SUNBELT NNP
RAPHAEL NNP
PEEBLES NNP
LOTS NNS
CONNORS NNP
LOTT NNP
SWIMMER NN
EARTHMOVING JJ
PRECURSOR NN
PACKETS NNS
KELLNER NNP
PRE-SIGNED VBN
COMPARISONS NNS
LOTOS NNP
LOUD JJ RB
425,000-SQUARE-FOOT JJ
PALTRY JJ
STOCKBROKERS NNS
GAZETA NNP
SOUNDTRACK NN
PHOTOCOPIERS NNS
NON-DUCK JJ
CONSTITUENT NN JJ
SWEATSHIRTS NNS
REPRESENTED VBD VBN
FETISH NN
NUNN-MCCURDY NNP
RETINOBLASTOMA NN
4,695 CD
LASHING VBG
FEELERS NNS
101.45 CD
CHEAPEST JJS
RECURRING VBG
PEDDLED VBN
12-COUNTY JJ
IMPLANTING VBG
MULTISIDED JJ
PREPARATIVES NNS
CONNOTE VB
MICROSOFT NNP
LOVE NN VBP VB NNP
COLES NNP
LUCAS NNP
BANDLER NNP
1989-MODEL JJ
REDDENED VB
LOW- JJ
DEGREES NNS
TUITIONS NNS
PEDDLER NN
BULL-MARKET NN
M.W. NNP
PEDDLES VBZ
COMPLICATION NN
MUSSOLINI NNP
HUMONGOUS JJ
STABBING VBG
INTERESTING JJ
SYMS NNP NNS
FIRST-HALF JJ NN
MEAN-SPIRITED JJ
PARCEL NNP NN VB VBP
LOWE NNP
SMILINGLY RB
TANKERS NNS
SEVEN-YEN JJ
FILLS VBZ
HELPS VBZ
SYNC NN
GIFTS NNS
OUTLAY NN
JUGGLE VB
FILLY NN
LOWS NNS
101.60 CD
SPORADICALLY RB
AQUA NNP
OBEDIENT JJ
AMORTIZE VB
MENGISTU NNP
REVISE VB
ONE-UPSMANSHIP NN
MAGISTERIALLY RB
FILMS NNS
SEIKO NNP
HONEYMOON NN
STOCK-OPTIONS NNS
PLASMA NN
CURLED VBD
UNFAIR-TRADE JJ
VOWED VBD VBN
A$ $
SE\/30 NNP
CASH-HUNGRY JJ
EDUCATIONAL JJ NNP
JURY NN
SHORTER-TERM JJ JJR
101.75 CD
VOWEL NN
S*/NNP&P NN
BRAZILIANS NNS
A. NNP NN JJ LS
FIRST-HAND JJ
SCOFF VBP NN
BECKWITH NNP
JOUSTING VBG
KADONADA NNP
CURLEY NNP
MENTOR NN NNP
COURSE-CORRECTION NN
VILLAGES NNS
FRAGILE JJ
DETECTOR NN
INDULGES VBZ
SCHOOL-BOARD NN
PLUGGING VBG
HEEDED VBD VBN
THRIFT-INDUSTRY NN
AA NN
SNIPED VBD
AB NNP
SHERLUND NNP
DELAWARE NNP
AD NN NNP FW
QUIETING VBG
JUST RB JJ
AG NNP
101.80 CD
AH UH
AI VBP VBZ
AL NNP
OFF-ROAD JJ NNP
AM VBP NNP RB
59.2 CD
AN DT , NNP
59.3 CD
B. NNP LS
59.4 CD
SNIPER NNP
AP NNP
59.5 CD
59.6 CD
GENERAL-INSURANCE NN
59.7 CD
SPLASHED VBD
B2 NN JJ
AS IN RB NNP JJ
59.8 CD
COLIN NNP
AT IN RP NN NNP
59.9 CD
MAJOR-PARTY JJ
AU FW NNP
BOMBLETS NNS
JUTE NN
AW UH
AX NN
BORAX NNP
DROOLING VBG
SYRINGE NN
ADEPTS NNS
ELECTRICIAN NN
PIECEMEAL RB
DELECTABLE JJ
C$ $
BE VB VBP
PARKERSBURG NNP
101.90 CD
DISCOVISION NNP
DANIEL NNP
BK NNP
101.95 CD
MISINFORMATION NN
AMVEST NNP
REVIVE VB VBP
C. NNP LS
BO NNP
101.98 CD
HISTORY NN
BP NNP
DEMONSTRATORS NNS
BT NNP
LOTUS NNP
18-A-SHARE JJ
EDINBURGH NNP
BV NNP
DELECTABLY RB
BY IN RB RP NNP
OUTLET NN
NON-FOOD JJ
CA MD NNP JJ
CRIMINALITY NN
CB NNP
REDEVELOP VB
CD NNP NN
SYNDCIATED VBN
ELECTROREALITY NN
CF NNP
DEFINE VB
OVERWEIGHTED VBN
FRATERNITIES NNS
ANTIQUITIES NNS
SAUCE NN
D. NNP
CO NNP
GUIDED-MISSILE JJ NN
NACHMAN NNP
CS NNP
INESCAPABLE JJ
RUSTICATED VBN
HYSTERICAL JJ
LOUIS-BASED JJ
ENDURING VBG JJ
CY NNP
OBTAIN VB VBP
PRECURSORY JJ
GERMS NNS
LOGICALLY RB
BUYINGS NNS
QUILL\/WILLIAM NNP
SYSE NNP
SAUCY JJ
DA NNP NN
LONG-DISTANCE JJ NN
DD NNP
DE NNP FW IN JJ
GATWARD NNP
ENTRENCHMENT NN
DG NNP
DI NNP FW
MYTHIC JJ
DJ NNP
LOVING JJ
E. NNP
DO VBP VB NNP
SAUDI NNP JJ
LAGNADO NNP
DS NNS
HOMEBREW NNP
DU NNP FW
FIXEDRATE JJ
RETORT NN
TWENTY-FIRST NNP
KAGAN NNP
UNSUCCESSFUL JJ
QUASI-FEDERAL JJ
TRI-COLORED JJ
ANTI-DIARRHEAL JJ
EC NNP
ED NNP
BORED VBN JJ
ODELL NNP
LUCID JJ
EL NNP
EN IN FW
AVIANCA NNP
F. NNP
ATTAINABLE JJ
ALBION NNP
BOREN NNP
ER UH
COMPANIONS NNS
EDMOND NNP
ET NNP FW CC
COLDER JJR
BORER NN
NATIONALLY RB
LUCIO NNP
EX JJ FW
SEMICONDUCTOR NN NNP
DEPLOYMENT NN NNP
HAAGEN-DAZS NNP
136-YEAR-OLD JJ
PRE-STRIKE JJ
ATHENIAN JJ
FE NNP
REVENUES NNS
PAPANDREOU NNP
41-YEAR-OLD JJ CD
SUNKIST NNP
FM NNP NN JJ
PORSCHE NNP
CLAD VBN JJ
SCOLD VB
DEALER-MANAGER NN
G. NNP
FILTH NN
POPULISM NN
EG&G NNP
FT NNP
COLO. NNP
SCHIZOID JJ
CLAN NN NNP
RERUNS NNS
POPULIST JJ NN
NUCLEAR-ARMED JJ
SCIATICA NN
LINGER VB NNP
OFF-BASE JJ
ANTI-WAR JJ
CONSIGNS VBZ
THAILAND NNP
CREDITWORTHY NN
GA NNP
CLAY NNP
GE NNP
MORE-EFFICIENT JJ
BORGE NNP
ADRIAN NNP
GI NNP
PERFECTED VBN
GM NNP
H. NNP NN
GO VB VBP NN NNP
GP NNP
COLON NN NNP
COLOR NN NNP JJ VB
FIXATION NN
CRUCIAL JJ
EMANUEL NNP
LUCKY JJ NNP
1962-63 CD
SUPERCONCENTRATED JJ
1970-85 CD
HD NNP
HE PRP
SUBTILIS NNS
HG NNP
ALBUM NN NNP
PROTOCOL NN NNP
CRITERIA NNS
HK NNP
ODEON NNP
SEITA NNP
HN NNP
CRIMINALIZE VB
I. NNP NN
HO NNP
SUPERCONCENTRATES NNS
HP NNP
PHILANTHROPIST NN
LITTMAN NNP
HU NNP
BEAMED VBN
NEWSPEAK NNP
EXHIBITORS NNS
STOCK-MANIPULATION NN JJ
DISCOMFIT VB
RIVAL-BASHING JJ
CONSPIRED VBD
GERRY NNP
SATURATED VBD VBN
WEARING VBG
ID NN
SIDORENKO NNP
SLUMPING VBG JJ
IF IN JJ
MCAULEY NNP
IG NNP
BORIE NNP
II NNP CD
HIGHWAY-RELIEF JJ
IL NNP FW
DOORDARSHAN NNP
LOATHING NN
787.02 CD
SLAYING NN
AFLOAT RB
IN IN RP RB NNP FW RBR NN
DANILO NNP
J. NNP
IO NNP
IQ NNP
STRESS-PRODUCING JJ
IS VBZ NNS NNP
IT PRP NNP
GRAY-BEARD JJ
IV NNP
BORIS NNP
ABSORBENT JJ
IX CD
230-A-SHARE JJ
SCOOP VB NN
KLINSKY NNP
DAIN-SPONSORED JJ
OFFSET VBN VB VBP VBD
INSPECTS VBZ
1962-85 CD
UNRECOVERABLE JJ
SPLINTS NNS
DELIGHTFULLY RB
PASSENGER-RESTRAINT NN
ORONDO NNP
JH NNP
AFTER IN RB IN|JJ
KLEIN NNP
BADEN-WUERTTEMBURG NNP
STICKER NN
LAUSANNE NNP
HOSPITALS NNS NNPS
K. NNP
JO NNP
SCOPE NN
OAKLAND NNP NN
JP NNP
JR NNP
715.1 CD
CLEO NNP
COMPENSATORY JJ
1992-2000 CD
INTELLECTUAL JJ NN NNP
MOODY NNP NN JJ
FERNANDO NNP
ALISKY NNP
VADAR NNP
VADAS NNP
BLUDGEON VB
KE NNP
ESCROW NN
DIXIE NNP
BRISSETTE NNP
KK NNP
QUAINTLY RB
TABLEMODEL NN
L. NNP
KO NNP
INTERPRETING VBG
UNINSURED JJ
PANTHEON NNP
RUMORED VBN JJ VBD
SEMI-ANNUALLY RB
KU NNP
KV NNP
PALEONTOLOGICALLY RB
KY NNP
STIRRINGS NNS
MONOPOLIZING VBG
COUNTERSUING VBG
SPRUELL NNP
BAULIEU NNP
CYNICALLY RB
BIOMEDICAL-PRODUCTS NNS
STOP-GAP JJ
LA NNP FW DT
UPPER-CLASS JJ
FASTER-GROWING JJR
M$ $
LE DT NNP FW
MCMEEL NNP
LIVERMORE NNP
LI NNP
ARAB JJ NNP
M. NNP
SCORE NN VBP
HASENAUER NNP
ARAI NNP
PURCHASED VBN VBD JJ
CONSUMPTION NN
ZWIREN NNP
M2 CD
ZURICH-BASED JJ
SAULL NNP
M4 NNP
ARAN NNP
QUARRY NN
WEALTHIER JJR
SCORN NN VB VBP
COLTS NNP
TEMBLOR-PRONE JJ
EVERYWHERE RB
HEAPED VBD VBN
EXAMINE VB VBP
CONTEMPT NN
DILUTED VBN JJ VBD VBN|JJ
CORRECTIONS NNS
SQUANDERED VBN
MAGICIANS NNS
PC-MAGAZINE JJ
PURCHASER NN
PURCHASES NNS VBZ
MA NNP
MILESTONE NN
MC NNP
MD NNP
UTAH NNP
ME PRP FW
SITUATIONS NNS
COWBOY NN
TENNEY NNP
MANEUVERINGS NNS
BENEATH IN
N. NNP
MO NNP NN
MP NNP
TECHDESIGN NNP
MR NNP
PIGSTY NN
LONGEVITY NN
PRIDEAUX NNP
ABSORBERS NNS
JEANE NNP
MX NNP
DISPOSABLE JJ
MY PRP$ NNP JJ
CONSTITUENCY NN
ARBS NNS
HORIZON NN
FULL-POWER JJ
ARBY NNP NN
NA TO
EXONERATED VBD VBN
SEIYU NNP
1,250,000 CD
JEANS NNS
31\/32 CD
BORNE VBN
NH NNP
SAUNA NN
NL NNP
COLLEGE-BOWL NN
SMALL-COMPANY NN JJ
OUTSIDE IN JJ NN RB
O. NNP
NO DT RB UH NNP
DURCAN NNP
CLOTURE NN
NP NNP
ECHELON NN NNP
ARCH VBP NN NNP
PROMISE NN VBP VB NNP
SEIZE VB VBP
MELDING NN VBG
PALUCK NNP
BOND-HOLDERS NNS
NT RB
555.5 CD
NU NNP
555.6 CD
SWOLLEN JJ
NV NNP
MCCHICKEN NNP
ARCO NNP
PHYSICIAN-EXECUTIVE JJ
CLIP VB NN
HERRERA NNP
REVOLUTIONARIES NNS
SCOTT NNP
PERFECTLY RB
RAIL-TRAFFIC JJ
EXISTENT JJ
OF IN RP RB
OH UH
UNSUBSIDIZED JJ
DEBUNK VB
TRAGIC JJ
OK JJ UH NN
301.9 CD
WEAPONS NNS NNP
ON IN RP RB NNP
AFFIRMED VBD
P. NNP
BARRICK NNP
VIRTUE NN NNP
OR CC
OX NN
OY NNP
OZ NNP
SCOUR VB
THEATER NN NNP
SCOUT VB NN
PA NNP
CARNEGIE-MELLON NNP
PC NN NNP
DANISH JJ
EXECS NNS
STRAIGHTEN VB
PI NN
AREA NN NNP
PREVIOUS-YEAR JJ
STRAIGHTER RBR
Q. NNP
PO NNP
PICCOLINO NNP
PR NNP
MONTGORIS NNP
SELF-STARTING JJ
PS NNP
475.6 CD
PX NNP
SKITTISHNESS NN
OMITS VBZ
FAIR-TRADE-RELATED JJ
SATURDAY NNP
DOUGLAS NNP
JAMES NNP
BENNETT NNP
TENNIS NN
SUFFICIENTLY RB
QE NNP
221.4 CD
SKIDDED VBD VBN
REJUVENATION NN
NOISE NN
R. NNP
RESHAPING VBG
DIXON NNP
2\/32 CD
DANGERS NNS
MANINSTAYS NNS
BARRIER NN NNP
SCOWL VBP
AUBREY NNP
MARGINALIZING VBG
BOWLES NNP
MEDICAID NNP
42,374 CD
RA NNP
RD NNP
STJERNSWARD NNP
S$ $
RE NNP
TEDDY NNP NN
74%-OWNED JJ
ALLEGORY NN
CONCLUSIVELY RB
S. NNP
KAFKAESQUE JJ
395.3 CD
BATTLEMENTS NNS
395.4 CD
ONE-NEWSPAPER JJ
MISERLY JJ
MERILL NNP
RV NN
AVERRED VBD
STRONG-ARM JJ
41,900 CD
SMALL-DENOMINATION NN JJ
INTERRUPTING VBG
CHATTER NN
LOYALTY NN
ENTRANCE NN
PROVENANCE NN
VADIM NNP
FRANCHISE NN VB
SA NNP
LENGTHEN VB VBP
141.1 CD
FORBIDDING VBG
SE FW NNP
SF NNP
KLERK NNP
T' PRP
SH NNP
UNDERPINNED VBN
GALLSTONES NNS
SI NNP
ENTERING VBG NNP
141.8 CD
CASTOR-OIL NN
141.9 CD
T. NNP
SO RB IN CC
WIDE-BODY JJ
GENRES NNS
DEFINING VBG
SR NNP
ESCALATED VBD VBN
CONSCIENTIOUS JJ
SS NNP
ST NNP
PACIFICARE NNP
SEARCH-AND-SEIZURE JJ
PANETTA NNP
INTERRUPTION NN
TA NNP
5,350,000 CD
TB NN
TC NNP
DIVISIONS NNS
K-RESIN NN
TABLES NNS
DEMOBILIZING VBG
ARIA NN
TI NNP
GRANDMOTHERLY JJ
CAMPUSES NNS
TREBLED VBD
CLUSTER NN
COST-BENEFIT JJ
ACCOUNTING-RULES JJ
U. NNP
TO TO IN JJ NN
TELL-TALE NN
JAMIE NNP
AWARENESS NN
TU NNP
TV NN NNP
WRESTLERS NNS
TW NNP
SIMPLIFYING VBG
MOONS NNS
GATHERINGS NNS
TY NNP NN
MADMAN NN
AFNASJEV NNP
VIVIEN NNP
CLOW NNP
ARIZ NNP
MOSCOW-SHANNON JJ
UNDERSTAND\/ADOPT VB
717,000 CD
TOYOBO NNP
UH UH NNP
LIGHTNING-FAST JJ
ALCAN NNP
NEWSLETTERS NNS
UK NNP
TACKING VBG
ELECTRICITY NN NNP
LEVENTHAL NNP
911,606 CD
V. NNP CC IN
UP RB RP IN JJ NNP IN|RB
US PRP NNP
INSOLVENCY NN
DOWNSIZING NN VBG
ARK. NNP
BLACK-MARKET NN
PIOUS JJ
ACTING VBG JJ NN NNP
VA NNP
INTEGRATED-TECHNOLOGIES NNS
SLUGGER NN
REQUISITE JJ
WALNUT NNP
VF NNP
WAIT-AND-SEE JJ
VI NNP
OBSTACLES NNS
W. NNP NN
VS NNP
VT NNP
VU NN
OCCURRING VBG
RESPONDS VBZ
PHILOSOPHY NN
LAWFULLY RB
LINGUS NNP
PIE-IN-THE-SKY NN
RIDER NN
RIDES NNS
WA NNP ,
MATTONE NNP
4,720 CD
NET-PROFITS JJ
207.4 CD
WE PRP VBP
ACTION NN NNP
FRANC-DENOMINATED JJ
SOLICITATIONS NNS
WO MD
X. NNP
UNOPPOSABLE JJ
WU NNP
LOUIS NNP NNS
INITIATIORS NNS
BRIBERY NN
GEPHARDT NNP
BRONFMAN NNP
SHAMANISTIC JJ
HALF-INTEREST NN
WOOD-GRAIN JJ
U.S.S.R NNP
DAI-ICHI NNP
UNSEATED JJ VBD
547,000 CD
KATHRYN NNP
300-A-SHARE JJ
MOORE NNP
XL NNP
HIGH-YIELD JJ NN NNP
Y. NNP
FAILURE NN
NETWORK-ACCESS JJ
9.03 CD
RIDGE NNP
LONG-CANCELED JJ
9.05 CD
9.06 CD
9.07 CD
GOVERNMENT-HELD JJ
WORDS NNS NNPS
111,000 CD
CAPRICIOUS JJ
NATIONWIDE JJ NNP RB
NEGATIVE JJ NN
ARMS NNS
16.375 CD
MINIMUM-FEE JJ
ARMY NNP NN
YA PRP
UNFLAKY JJ
ALCEE NNP
LIMITING VBG
127.5 CD
UNCHARACTERISTICALLY RB
108-YEAR-OLD JJ
DEFINITE JJ
Z. NNP
YO NNP
PLATES NNS
TUMORS NNS
9.12 CD
9.13 CD
PERIODICALS NNS
9.19 CD
HAWKERS NNS
244,000 CD
MORLEY NNP
QINTEX NNP
MAGNETICALLY RB
HIGH-HORSEPOWER JJ
PONYING VBG
MOVIE-STUDIO NN
BARRING VBG
CLUB NN NNP
SYNTHESIZER NN
CLUE NN NNP
ACCOMPLISHMENTS NNS
RIGHTWARD JJ
46,245,000 CD
9.25 CD
SWEEPSTAKES NN NNS
ONETIME JJ
9.28 CD
OIL-RELATED JJ
9.29 CD
MERITS NNS
AWAIT VBP VB
53-FLOOR JJ
EXTREMISTS NNS
NOWHERE RB
BAFFLING JJ
664.83 CD
MEDICARE NNP
SIZZLE VB
INCONSISTENT JJ
BACKYARD NN
CONTRADICTIONS NNS
300ZX NNP
\* SYM NN
CHUTZPAH NN
STATE-OWNED JJ
9.31 CD
9.32 CD
9.33 CD
9.34 CD
MISCHIEVOUS JJ
9.35 CD
COMBO NNP
9.37 CD
SOLDIER NN
9.39 CD
ARPS NNP
ARMORED-VEHICLE JJ
HARLAND NNP
ALBERTA NNP
REPEATING VBG JJ
MCNICHOLS NNP
4,773 CD
GOVERNMENT-FUNDED JJ
AWAKE RB JJ
ALBERTO NNP
MIDDLEMAN NN
EISAI NNP
OUT-OF-STATERS NNS
THEATRE NNP FW
9.42 CD
74.4 CD
HAIRYKNUCKLED JJ
GRODNIK NNP
9.43 CD
74.5 CD
GABE NNP
9.45 CD
74.8 CD
74.9 CD
19931999 CD
9.49 CD
TWO-THIRDS NNS JJ
PRESENCE NN NNP
HUNTERDON NNP
PER-AD JJ
RANDOMNESS NN
HUMORIST NN
BROADEN VB
ACCIDENT NN NNP
LOW-PAID JJ
DIETER NNP
SKYLINE NN
BROADER JJR
ENCROACHING VBG
REMODELING VBG NN
LUFTHANSA NNP NN
BOURKE NNP
SAVINGS-TYPE JJ
9.50 CD
9.51 CD
DIVIDING VBG VBG|NN|JJ
QUIVERS NNS
9.53 CD
BROWN-TOBACCO JJ
9.55 CD
BETTNER NNP
9.58 CD
TINSELTOWN NNP
GIBRALTAR NNP
FREIND NNP
MAKWAH NNP
INTRAUTERINE JJ
ACTIVE JJ
ANTI-HEROES NNS
DARKHORSE NNP
CORSICA NNP
VOCALIST NN
BEEBES NNPS
FICKLENESS NN
DOGMA NN
ROSENFIELD NNP
9.60 CD
TAPED VBN VBD
GOODRICH NNP
9.62 CD
ASMAN NNP
9.63 CD
9.65 CD
DRUG-DEALING NN
CONSTITUENTS NNS
SPRING NN NNP VB
MOSBACHER NNP
SCANDAL-TOSSED JJ
9.68 CD
8,500,000 CD
9.69 CD
COMES VBZ
IRRADIATED JJ VBN
TAPER VB
COMEX NNP
TAPES NNS
MILDER JJR
PRODUCTION-SHARING JJ
SPRINT NNP
MONOGRAM NNP
REPAY VB
PEAK NN JJ VB NNP
3-A-SHARE JJ
PEAL NN
MILDEW NN
EVIDENCE NN
KELLOGG NNP NN
UNGAINLY JJ
HEFTIER JJR
EXERT VB
PEAS NNS
CHURCH-GOERS NNS
PEAT NNP
AMSTRAD NNP
COMPLEXITY NN
9.70 CD
LOW-PROFIT JJ
9.75 CD
GORIOT NNP
DEDICATION NN
9.76 CD
SETTLED VBN VBD JJ
9.77 CD
WORKS VBZ NNS NNP NNPS
9.78 CD
ARTS NNS NNP NNPS
XIAOQING NNP
ARTY NNP
UPSETTING VBG
SETTLES VBZ
VARGAS NNP
FRAUDS NNS
SLIPSHOD JJ
R2-D2 NN
SUBCONTRACT VB JJ
WORLD NN NNP
THICKNESS NN
RELOCATE VB NN
MIDDLEMEN NNS
9.80 CD
INEFFABLY RB
9.81 CD
MOUNTING VBG JJ
9.82 CD
PICASSO NNP NN
FRENCHMAN NNP
9.83 CD
9.84 CD
9.85 CD
9.86 CD
RITTERMAN NNP
9.87 CD
9.88 CD
9.89 CD
THREE-RUN JJ
HAYES NNP
`` ``
PECK NNP VBP
APATHY NN
ATCHINSON NNP
DIVERGENT JJ
REFORMING VBG
ACROSS IN RP
TESTIMONY NN
REDDINGTON NNP
WROUGHT VBD
9.90 CD
HANDLERS NNS
EGAD UH
9.91 CD
9.92 CD
9.94 CD
9.95 CD
HORMONE NN
WORMS NNS NNPS
TWEAKING NN
EGAN NNP
LOUSY JJ
CONTENDS VBZ
LABEL NN VB VBP
CHICAGO-MANCHESTER NNP
INTRACTABLE JJ
COMIC JJ NN
JAPANESE-MADE JJ
SCHOOLCHILDREN NN NNS
IDEALS NNS
YEN-SUPPORT JJ
REPEL VB VBP
VINDICATED VBN
PALOMINO NNP
ALCOA NNP
PEEK NN
COMPONENTS NNS NNP NNPS
GREATER-FOOL JJR
ASLANIAN NNP
PEEP NN
BIG-BUSINESS NN
PEER VB VBP NN
MOSETTIG NNP
SENSIBILITY NN
AWARD NN VB
PURINA NNP
DEBT-LADEN JJ
AWARE JJ
OBJECTIONABLE JJ
MALEFACTORS NNS
EISHI NNP
BALLARD NNP
RECONCILIATION NN NNP
BELLAS NNP
SHORT-SELLERS NNS
PERMEATED VBD
CABERNETS NNPS
SLASHING VBG
CANADIAN-DOLLAR JJ
GAIN NN VB VBP NNP
KASSAN NNP
HEMOGLOBIN NN
THREE-SPOKED JJ
ANALOGY NN
BROADLY RB
ENTRANTS NNS
BOSCH NNP
NEW-TELEPHONE-LINE NN
EVOLUTIONARY JJ
PROBLEM NN NNP
GAJA NNP
5:04 CD
AWASH JJ RB
COLECO NNP
COUDERT NNP
BOSCO NNP
5:09 CD
ALIMONY NN
ERDOLVERSORGUNGS NNP
ANTICIPATING VBG
TAX-COLLECTING JJ
DISBANDED VBN
LEGUME NN
TADEUSZ NNP
WHIMSY NN
51,000 CD
SHANGHAI NNP
ARCHITECTURE NN NNP
KOPPERS NNP
ESCAPING VBG
296,187 CD
BEFOREHAND RB
PEGS VBZ
HANDSOME JJ
RESPONSE NN NNP
PLEASURABLE JJ
BOURSE NNP FW
ROTHWELL NNP
VANISHED VBD VBN
REHEARING NN
BENCHES NNS
METZENBAUM NNP
TURKS NNPS
730.1 CD
OIL-PRODUCING JJ
VANISHES VBZ
NINE-POINT JJ
SCHWARZ NNP
ANTICIPATION NN
KAHAN NNP
TAX-COLLECTION JJ
HALLUCIGENIA NNP
12,470,000 CD
CRAWFORDSVILLE NNP
MILDLY RB
ABRUPT JJ
COUNCILWOMAN NN NNP
BOILERS NNS
PIPED VBD VBN
SAVED VBN VBD NNP
GALA NN NNP
SYMBOL NN NNP
GALE NNP
THWART VB
VENDETTA NN
REFORMIST NN JJ
GALL NN
TOYOTA NNP
PIPER NNP
PIPES NNS
PENETRATING VBG
OUTMODED JJ VBN
SAVES VBZ
WORRY VBP VB NN
PSYCHIATRIC JJ NNP
SHAREHOLDERS NNS NNP
JUST-IN-TIME JJ
MAIL-ROOM NN
DOLPHIN NNP
OLEFINS NNS
WORSE JJR RBR RBR|JJR NNP
DISEMBARK VBP
JACOBS NNP
5:30 CD
SHIPSETS NNS
REFUNDS NNS
MINISERIES NN NNS
REPUBLICAN-GOVERNOR\/DEMOCRATIC-LEGISLATURE JJ
GAME NN NNP
EASY-TO-USE JJ
UBS-PHILLIPS NNP
THERAPY NN
COURTESY NN
WORST JJS RBS
650.9 CD
GOVERNMENT-RELATIONS NNS
JURISDICTIONAL JJ
ERWIN NNP
NOWADAYS RB
EGGS NNS NNP
FRANTIC JJ
DISSIDENT JJ NN NNP
PENETRATION NN
GOLDSTEIN NNP
POLITICIAN NN
DISASSEMBLE VB
20-YEAR-OLD JJ
SUNDANCE NNP
5:40 CD
WORTH JJ NN NNP IN
GEVERGEYEVA NNP
TURNS VBZ NNS
GANG NN
BIOTECH JJ
POLAND NNP
CAPTAIN NN VBP
GANN NNP
CONREID NNP
CAUTIONS VBZ
243,677 CD
PROCLAIMS VBZ
MACSHARRY NNP
GANT NNP
ONEROUS JJ
GLANCED VBD
INSIDE-THE-BELTWAY NN
HAYNE NNP
BEARING NN VBG
TRUSSED-UP JJ
APOLOGIZING VBG
PARDON NN
COMPUTER-INTEGRATED-MANUFACTURING JJ
WANING VBG JJ
26,000 CD
SCUFFLE NN
MONTBRIAL NNP
162,767 CD
REPLY VB NN
PELL NNP
MISDEEDS NNS
BOUTWELL NNP
DRUG-POLICY NN
SCHRAGER NNP
LOGSDON NNP
INTERPRETATION NN
FAITHFULLY RB
517.85 CD
TIE-INS NN NNS
GREENHILL NNP
HOLYOKE NNP
76-STORY JJ
EMPOWER VBP
PAGEANT NN
SAVIN NNP
QUOTATION NN
NETWORK-BUYING JJ
FINELY RB
CAPACITY NN
ANCHORS NNS
TEST-MARKETING JJ NN
PATRIOTIC JJ
FEMINISTS NNS
MUTTERS NNS
STEALING VBG
FINANCED VBN VBD
GESTE NNP
TELEVISING NN
DISINTEGRATING VBG
PRAISING VBG
ROUGH-CUT JJ
DISPLACING NN
QUANTITATIVE JJ
LOCUTIONS NNS
PIQUANT JJ
FINANCER NN
UNRESOLVED JJ
FINANCES NNS VBZ
ELLMANN NNP
AHOLD NNP
PENG NNP
PENH NNP
LABOR NN NNP
1772.1 CD
SO-SO JJ
LIKENING VBG
PENN NNP
EMBROILED VBN
BANDAGES NNS
1772.6 CD
PENS NNS
15TH-CENTURY JJ
VOUCHER NN
HANGING VBG NN
ADMINSTRATION NN
WOES NNS
INDEXERS NNS
TELEVISION NN NNP
RELOCATIONS NNS
DISINTEGRATION NN
GUZEWICH NNP
STAFFS NNS
GARN NNP
NAZI-OCCUPIED JJ
ENDLESSLY RB
GARY NNP
REAPPRAISAL NN
GAZETTE NNP
2%-3 JJ
NEUTRAL JJ
ENGLISH-LANGUAGE JJ NN
UTILITIES NNS NNP NNPS
INLAY NN
SEVENTH JJ NNP
GASB NNP
COHORTS NNS
WINDFALLS NNS
INEFFECTUAL JJ
INDIVIDUAL JJ NN NNP
HIGH-PAID JJ
GASP VB
SEVENTY CD
MELLIFLUOUS JJ
5,200 CD
PRESENTS VBZ NNS
FOREST-PRODUCTS NNS JJ
APPROVALS NNS
LAWRENSON NNP
CELLULAR-PHONE NN
DISASSOCIATE VB
BEARISH JJ
RECKLESSLY RB
GATE NN NNP
KEATINGLAND NNP
DISGUST NN
BOWMAN NNP
REACTIONS NNS
ATTESTS VBZ
145,954 CD
SLEDDING NN
FEMALE JJ NN
OPENNESS NN
FORWARD-RATE JJ
152.08 CD
GATT NNP
RIPENS VBZ
CONTINENT NN NNP
WHICH WDT IN
16%-OWNED JJ
EXERCISE NN VB VBP
RIEGLE NNP
IRONWEED NN
SWEARING NN
SUPPLY-DEMAND JJ
556.5 CD
YAMAICHI NNP
BOREDOM NN
REPS. NNPS NNP
EGON NNP
DISTANCE NN VB NNP
BRIGHTEST JJS
PERE NNP
YAMATAKE NNP
CAUTIOUS JJ
EGOS NNS
MINNESOTA NNP
PARDUS NNP
PERK JJ NNP
12,283,217 CD
ROLLOVER NN
DIDACTIC JJ
ASDA NNP
COOPERS NNP
PERU NNP NN
BOSOM NN
BUTLERS NNS
TERMINATING VBG
GAVE VBD
FREEWAYS NNS
CONVENING VBG
SAVOR VB
FINERY NN
PHOTOGRAPHS NNS VBZ
REAPPRAISED VBD VBN
BARRAH NNP
42,455 CD
SAVOY NNP
520,000 CD
PUBLISHING NN VBG NNP
PHOTOGRAPHY NN NNP
COPPERWELD NNP NN
PESO NN
SCHOEPPNER NNP
ASEA NNP
THUNDERBIRD NNP
JUGGERNAUT NN
INLET NNP
PRE-CHRISTMAS JJ
476.5 CD
HELPLESSLY RB
BELLOW VB
GENE-SPLICING NN
2160.1 CD
MOANING VBG
FINEST JJS
EGYPT NNP
FLIRTED VBD VBN
TERMINATION NN
PRO-INVESTMENT JJ
VIRULENCE NN
CONTENTS NNS
TAXPAYER NN NNP
PETE NNP
EVACUATION NN
144.17 CD
CONFIDENTIAL JJ NNP
JANET NNP
REINISCH NNP
WOKE VBD
222.3 CD
1758.5 CD
RENTALS NNS
ACCESORY NN
PETS NNS
222.8 CD
CANTER NNP
FEATHERSTON NNP
WADDLES VBZ
CONTRACTED VBD VBN
HAZARDS NNS
MULITIPLIER JJ
YAMATANE NNP
SEVENTH-CONSECUTIVE JJ
94,543 CD
DULUTH NNP
WOLF NNP NN
THIN-WALLED JJ
85.339 CD
ADMINSTRATIVE JJ
SINGLE-EMPLOYER JJ
FIORELLO NNP
COMPUTER-RELATED JJ
KURZWEIL NNP
BURYING VBG
COALITION NN NNP
HENCE RB
ONE-FOR-ONE JJ
INEQUALITY NN
PERVADE VBP
PITMAN NNP
GRADUATE NNP NN JJ
LAUDED VBD VBN
AT&T NNP NN
144.35 CD
CABLE-TELEVISION-EQUIPPED JJ
ANTI-SMOKING JJ
SEVICES NNS
ROSEMARY NNP
HIBOR NNP
350,000 CD
FLOORS NNS
DEVELOPMENTS NNS NNPS NNP
REDEMPTION NN
142.2 CD
DEPRIVATIONS NNS
142.3 CD
142.4 CD
1678.5 CD
LOVED VBD VBN
CLOTHIER NN
142.5 CD
MASTERSON NNP
142.7 CD
LAUDER NNP
DISARMING VBG
CO-PRESIDENTS NNS
JUICES NNS
GAZA NNP
RISK-TAKING NN
CAR-DEVELOPMENT NN
GAZE VBP
OUT-OF-STATE JJ
LOVER NN
LOVES VBZ NNP
JOSHUA NNP
MADNESS NN
INTERSTATE\/JOHNSON NNP
ASSAULTS NNS
EIGHT-FOOT-TALL JJ
BARRED VBN VBD
SPIFFY JJ
136.28 CD
MINEWORKERS NNPS
BARREL NN
BARREN JJ
WONG NNP
RESOURCES NNS NNPS NNP
SYNCHRONIZE VBP
ALPHONSUS NNP
5,273 CD
ASIA NNP NN
KALAMAZOO NNP
CARRYING VBG NN
BARRET NNP
TOEHOLDS NNS
WALKIE-TALKIE NN
TEST-PREP JJ
LIVING-BENEFITS JJ
GIGANTIC JJ
ASIL NNP
IMF-APPROVED JJ
FINAL JJ NNP
PREJUDICIAL JJ
WRITE-DOWN NN
16.436 CD
128.19 CD
144.57 CD
UNCLE NN NNP
PODUSKA NNP
DISTRIBUTING VBG NN
4,800 CD
WOOD NN NNP
HYPED NN VBD
EDDIE NNP
MUSEUM NNP NN
HAVING VBG
WOOL NN
HYPER JJ
144.60 CD
SPICE NN
180,000 CD
DISCLOSED VBN VBD JJ
NON-ECONOMISTS NNS
NATURAL-FOODS NNS
TRUSTING VBG
DISTRIBUTION NN
ASKA NNP
UPTREND NN
7\/100THS CD
NOTCHED VBD
YOKICH NNP
12-CENT-A-SHARE JJ
DISCLOSES VBZ
FLEX-TIME JJ
MAHMOUD NNP
JURGEN NNP
UNCONTESTED JJ
DEPARTURE NN
WHINER NN
ASKO NNP
ASKS VBZ
HERNIATED VBN
METEORIC JJ
TIGHTNESS NN
SAVVY JJ NN
WHILE IN NN VB
ORCHESTRATING VBG
PHONE-COMPANY NN
HEAVY-MACHINE JJ
LABORATORY NN NNP
208.7 CD
208.8 CD
HUTTON NNP
VILLAGE NN NNP
RELOCATING VBG
DETENTION NN
FLOATING-RATE JJ NN
144.80 CD
GLASSES NNS
FRABOTTA NNP
FINDS VBZ NNS
SPIED VBD
GOLD-MINING JJ NN
325,000 CD
OBSESSED JJ VBN
69,553 CD
WRESTLES VBZ
4,830 CD
WORD NN
LOCATED VBN JJ
WORE VBD
SEATTLE-BASED JJ
SPECULATING VBG
REJOICE VBP
PUNGENT JJ
THREE-HOUR JJ
WORK NN VB VBP NNP
BARRIS NNP
SPIES NNS VBZ
WORM NN
ORCHESTRATION NNP
FINED VBN VBD
WORN VBN JJ
DODSON NNP
WHIMS NNS
WORT NN
MILLING NN VBG
RUNDOWN NN
NEATLY RB
ELECTRONIC-DATA NN|NNS
RELOCATION NN NNP
ELECTRICAL-SAFETY JJ
WINDFALL NN
26-ROOM JJ
PINNING VBG NN
FINES NNS NNP
MATTERED VBN
SIPPING VBG
128.1 CD
128.6 CD
128.7 CD
128.9 CD
TAIWAN NNP
ALDEN NNP
SPECULATION NN
ROUSSEL NNP
NEWCOMERS NNS
COEXTRUDE VBP
MILLION CD JJ
SEPSIS NN
FAULTLINES NNS
EX-EMPLOYER NN
CONFISCATING VBG
INFLUENCE NN VB VBP
UV-B NN JJ NNP
UAL'S NNP
RICHARD NNP
SOILED VBD
BROADENED VBD VBN
HALF-OWNED JJ
SEVEN-MEMBER JJ
PREVAILS VBZ
INTERTECH NNP
18-YEAR-OLDS NNS
ONE-HALF NN JJ
NEUTRON NN
PAMPERED JJ
CAPITAL-TO-ASSETS NNS
STACKING VBG
155,000 CD
FIREWORKS NNS
DE-EMPHASIZE VB
CONFISCATION NN
CANTON NNP
3.846 CD
INNATELY RB
CANTOR NNP
SPRINKLE VBP
FETCHING VBG
BLEACHED JJ
D'AMIANTE NNP
CREDITO NNP
WHIPS VBZ
CREDITS NNS VBZ
BLEACHER NN
FLATTENED VBN VBD
PRO-SOVIET JJ
CLOTHING NN NNP
OVERCHARGES NNS
FAVORING VBG
GERMAN-MADE JJ
288,000 CD
CONTRACTOR NN
TEENS NNS
METAPHOR NN
BAA-1 JJ
800-YEAR-OLD JJ
ISACSSON NNP
BAA-2 NNP JJ
REFINANCING NN VBG
DECKHANDS NNS
MANMADE-FIBER JJ
DOCUMENTARY NN JJ
75.1 CD
75.2 CD
75.3 CD
BLUNTED VBN VBD
75.5 CD
RIEKE NNP
75.6 CD
CUYAHOGA NNP
75.7 CD
75.8 CD
SELF-EMPLOYED JJ
FINIS NNP
KIRGIZIA NNP
PETROLEOS NNP
BONITA NNP
RESTRUCTURING NN VBG
ASSASSINATED VBD VBN
DEPUTIES NNS NNPS
WANNISKI NNP
3.865 CD
WHIRL NN
ENDOWED VBD VBN
.125 CD
CONDE NNP
BEST-PITCHER JJ
PNEUMONIA NN
BUFFETTING NN
WOWS VBZ
ABANDON VB VBP
VAUNTED JJ
COUNTERACT VB
BEFITTING JJ
SCHAFER NNP
TRINOVA NNP
HARUKI NNP
BARRON NNP
APPLYING VBG
RIELY NNP
3.875 CD
UNDAMAGED JJ
CROWNING JJ
BARROW NNP
STEREOTYPE NN
16-STORY JJ
PERIPHERY NN
CONES NNS
SOBERING JJ
OXIDE NN
ANYWAY RB
316,400 CD
FINKS NNP
BANKRUPTCY-REORGANIZATION NN
PROPRIETORSHIPS NNS
WHITE NNP JJ NN
MATSUSHITA NNP
SPILL NN VB
ENHANCEMENT NN
KNACK NN
PROXIES NNS
TAX-DEDUCTIONS NNS
AMENDMENTS NNS
PFAU NNP
IDAHO-BASED JJ
POLICY-MAKING NN JJ VBG
COMPLICATIONS NNS
EXCLAIMS VBZ
WORKABLE JJ
RELUCTANTLY RB
EUROISSUES NNS
KIMBALL NNP
ENERGIZED VBN
YANKELOVICH NNP
LITTLETON NNP
TOUGHNESS NN
PULL-OUT NN
CORPORATIONS NNS NNP
SPECULATIVE JJ
SPACE-BUYING NN
SAMUEL NNP
ROBLES NNP
PRUSSIA NNP
FOILING VBG
BUDDHA NNP
SOGO-SHOSHA NN
HAND-WRINGING NN
AS\/400 NN
RUINOUS JJ
CONGO NNP
DOMESTIC JJ NN NNP
BROUGHT VBN VBD
REPAINTED VBN
JUSTIFICATION NN
PUPPET NN
SPINE NN
JANUS NNP
EBULLIENT JJ
BULLDOZERS NNS
SANDLER NNP
UPTEMPO JJ
MANAGEMENT-EMPLOYEE NN
NICARAGUA NNP
SPINS VBZ
DROPLETS NNS
VACUUM NN VB
SIDELINED VBN
PREOCCUPIED VBN JJ
PROFIT NN VB NNP VBP
RIEPE NNP
HENRI NNP
LACED VBN
TEETH NNS
CORRESPONDENCE NN
KEIZAI NNP
SIDELINES NNS
FAVORITE JJ NN NNP
DISMANTLE VB
HENRY NNP
IMPACTED VBN
LACEY NNP
ANGOLA NNP
SALABLE JJ
MEASUREMENTS NNS
SPECULATIONS NNS
PETROLEUM NNP NN
TIPSTERS NNS
CURRICULUM NN
READY-TO-EAT JJ
KITADA NNP
HYPING NN VBG
CASH-STRAPPED JJ
CANCELED VBN VBD JJ VBN|JJ
UNSOLVED NNP
10%-OWNED JJ
4\/4 CD
COMMISSIONS NNS VBZ
CITIES-ABC NNP
POLISHED JJ VBD VBN
AFFIRMATIVE-ACTION NN
REJOINS VBZ
DOMESTIC-MADE JJ
HARDEST-HIT JJ
VAEZI NNP
811.9 CD
ANTICIPATE VB VBP
SUNDAYS NNP NNPS NNS
12-MEMBER JJ
URINARY JJ
BLUNTLY RB
CAPITALGAINS NNS
BROWARD NNP
1989-82 CD
1989-83 CD
1989-84 CD
1989-85 CD
1989-86 CD
GERMETEN NNP
1989-87 CD
WITHDRAWN VBN
RIESE NNP
1989-88 CD
1989-89 CD
P.M.-MIDNIGHT NN
LAWMAKING NN JJ
CHOICES NNS
BEWKES NNP
REFERENCES NNS
PREVENTING VBG
PG&E NNP
SPIRE NN
CO-AUTHORS NNS
PRECAUTIONARY JJ
1830-1930 CD
ATKINSON NNP
HACKENSACK NNP
SPIRO NNP
SUJECT JJ
UN-WESTERNIZABLE JJ
BATHROOMS NNS
1989-90 CD
BELGIAN JJ NNP
CAMPAIGNS NNS
EUROSTAT NNP
DIVESTED VBD JJ
PILSUDSKI NNP
TUSKS NNS
EX-EMPLOYEES NNS
SUPPORT NN VB VBP
CONSTITUTIONAL JJ NNP
GOVERNMENT-CERTIFIED JJ
PREVENTION NN NNP
MULTIBILLION-YEN JJ
SUPPOSE VBP VB
GINSBERG NNP
ROTTED VBN
ROBOTIC JJ
INCREMENTAL JJ
CONTORTED JJ
18-TO-$19 JJ
GLAMOROUS JJ
ROTTEN JJ
CONN. NNP
FRIGHTENED JJ VBD VBN
FOUR-MEGABIT JJ
TERRIFYING JJ
SPITE NN
SCRUPULOUSLY RB
ANDREOTTI NNP
NADEAU NNP
LARGE-CITY JJ
ERUDITE JJ
GUZMAN NNP
MEMORANDUM NN
NOVELTIES NNS
KILDARE NNP
DEMOCRACIES NNS
MATCHMAKING NN
JANNEY NNP
KASTEN NNP
SECURED VBN JJ VBD
LACKS VBZ
20-A-SHARE JJ
NOKIA NNP
NEW-FOUND JJ
CHECKING-ACCOUNT JJ
GREENSBORO NNP
CNBC NNP
COMPUTERIZE VB
ANGORA NN
FOUR-YEAR JJ
COUP-PLANNING NN
HERBICIDE NN
PRUDE NN
FREIGHT-TRANSPORT JJ NN
EMBARRASSINGLY RB
CAVE-IN NN
BUY-AND-HOLD JJ CD
EVENSONG NN
PARENT NN JJ NNP
AUTOMOTIVE JJ NNP
PAPUA-NEW NNP
FILLED VBN VBD
AFOREMENTIONED JJ
PROFICIENT JJ
CNCA NNP
DISAGREEABLE JJ
CUSHION NN VB
ALDUS NNP
PREPAID-TUITION JJ
FILLER NN
SUNTORY NNP
PAYOFF NN
REFERRALS NNS
STUECKER NNP
BACK-OFFICE NN JJ
2,204,000 CD
MUTATION NN
RECOMBINANT JJ
THEORETICAL JJ
PROSTAGLANDIN NN
NEWS\/RETRIEVAL NNP
BACKSTOP NN
1,848,000 CD
ENLARGE VB
CORN-BASED JJ
SEVEN-YEAR JJ
VILLAINS NNS
REGISTERING VBG
LIABILITY NN NNP
PROVOKE VB
FOUR-PAGE JJ
PSYCHOANALYTIC JJ
SWAVELY NNP
FARTHER RBR RB
ACCESSORY JJ
GLAMORIZED VBN
ASSESSING VBG
KAIFU NNP
ROUNDED VBD JJ VBN
HELPED VBD VBN VBP
FOUR-POINT JJ
BATMAN NNP
STAGED VBD VBN
RESTRICTED VBN JJ VBD
HELPER NNP
ORDER-IMBALANCE NN
SPERRY NNP
STAGES NNS VBZ
DEVOTED VBN JJ VBD
GETTY NNP
FREDERICK NNP
SLUMP NN VB VBP
GIFTED JJ
CHESTMAN NNP
SLUMS NNS
DOWNFALL NN
INSTRUCTING VBG
DEVOTES VBZ
KNAPP NNP
SECOND-TIER JJ
ANNE-MARIE NNP
WRONGDOING NN
SOUTHMARK NNP
MERKEL NNP
OCCUPATIONAL-URGENT NNP
TALLAHASSEE NNP
INMAC NNP
34,320 CD
ARPANET NNP
50.161 CD
PERFORATED JJ
RENAISSANCE NNP NN
AJINOMOTO NNP
QUATRE NNP
SHAPED VBN JJ
19-DAY JJ
REDDER JJR
SEATROUT NN
RELAXATION NN
CONTE NNP
904,000 CD
PARENTAL-CONSENT JJ
EMOTED VBD
RESPECTIVELY RB
FACSIMILES NNS
INOPERABLE JJ
COLLABORATING VBG
INSTRUCTION NN
637.5 CD
3,420,936 CD
SHAPES VBZ NNS
ANTICULT NN
637.7 CD
SMALLER-THAN-EXPECTED JJ
GRANGES NNP NNS
DEMUNN NNP
COLINAS NNP
CAPABILITIES NNS
77-YEAR JJ
MORRISSEY NNP
25.125 CD
CONDUCTING VBG NN
GALLITZIN NNP
LOW-CALIBER NN
PHOTOFINISHERS NNS
23\/32 CD
REPLOGLE NNP
ACKNOWLEDGING VBG
ESTATE-TAX JJ
ENTHUSIASM NN
GET-TOGETHERS NNS
3,609,800 CD
PROSPECTS NNS
COCHRANE NNP
MOM-AND-POP JJ
GRANDFATHER NN
ENTHUSIAST NN NNP
BUTOWSKY NNP
QUICK-TO-PREPARE JJ
COLLABORATION NN
REBOUNDING VBG
CHRISTIAN-DEMOCRATIC NNP
CARING VBG JJ NN
PARTICULAR JJ NN RB
CLASSIFIED VBN JJ VBD
BASEMAN NN
SUB-STATION JJ
LEVIED VBD
5-FLUOROURACIL NN
STRIDES NNS
UNDER IN JJ RB
INSURANCE-RATE JJ
CAPITAL-SPENDING NN JJ
ASSASSIN NN
CLASSIFIES VBZ
XIANGYANG NNP
PAYOLA NN
557.7 CD
MILLIONS NNS
ATCO NNP
HILARIOUS JJ
SHALLOWER JJR
MAFIAS NNS
GENETICALLY RB
HICKS NNP
PROFIT-MAKING JJ
FRUSTRATING JJ VBG
734,000 CD
SENSUAL JJ
303.7 CD
MOBSTER NN
DISDAIN NN VB
COUNTRIES NNS NNP NNPS
303.9 CD
LINING NN VBG
BUILDINGS NNS
SATELLITE-DELIVERED JJ
OBRION NNP
17,500 CD
OVERCAPACITY NN
UNTESTED JJ
INFLUENZA NN
FITZGERALD NNP
BAKSHEESH NN
OPENING NN VBG JJ
LIBELED VBN
IRAQI JJ
TOTALS NNS VBZ
REDRESS VB
SLURS NNS
IN-DEPTH JJ
HUNKY-DORY JJ
EARTHQUAKE-STRICKEN JJ
MULTI-SPIRED JJ
HOME-ACQUISITION JJ
FRUSTRATION NN
477.1 CD
OPPORTUNISTIC JJ
ZAINUDDIN NNP
HOME-DELIVERED JJ
LETTERMAN NNP
SLUSH NN
FEROCIOUS JJ
DEMURS VBZ
ARGENTINIAN JJ
SENATE-HOUSE JJ
2161.9 CD
WALLOWING VBG
223.0 CD
FEEDLOTS NNS
PLEADINGS NNS
223.2 CD
223.3 CD
MONEY-MARKET JJ NN
223.4 CD
FLOPPY JJ
ARRESTED VBN VBD
223.7 CD
CREDIT-WORTHINESS NN
PUERTO NNP
DEPRESSION-ERA JJ
CHEAP JJ NN RB
UNEMPLOYED JJ NNP
DANGLING VBG JJ
HYDRAULIC JJ
CHEAT VB VBP
BLOOMINGTON NNP
PRUNE VB
TREMENDOUSLY RB
CHRISTIANSEN NNP
WEATHERMAN NN
ROUNDLY RB
HILLSBORO NNP
5.2180 CD
CORPORATE JJ NNP
CONSTRAIN VB
UNDID VBD
FOUNTAINHEAD NN
MASAMI NNP
CORRESPONDENTS NNS
COMPOSED VBN
PREVAILED VBD VBN
PROVOST NN NNP
CLERGYMAN NN
786,100 CD
MEGARGEL NNP
STRAIGHT-FROM-THE-SHOULDER JJ
COMPOSER NN
STRONGEST JJS
ABOARD IN RB
AVERTED VBN
LABOVITZ NNP
TRAILS NNS VBZ
GUBERNATORIAL JJ
PRESIDED VBD VBN
METERS NNS
BUBBLELIKE JJ
33.375 CD
UPJOHN NNP
236-6510 CD
CONTESTANTS NNS
PELLETS NNS
143.4 CD
143.6 CD
INFLUENCED VBN VBD NNP
ANTHEM NN NNP
CHECK NN VB VBP NNP
THIRDQUARTER NN
PRESIDES VBZ
INSTRUCTIVE JJ
MURASAWA NNP
RECLASSIFICATION NN
INFLATION-CREATED JJ
LOWER JJR RBR VB NNP VBP
PARCELS NNS
ANTI-DRUG JJ
INFLUENCES VBZ NNS
EMITTED VBN
YASUMICHI NNP
BAKING NNP
COMMAND-AND-CONTROL JJ
MOTHER NN NNP
PREMIER NN NNP JJ JJR
TIME-SENSITIVE JJ
RANCHERS NNS
GREASE NN
SUBSCRIPTIONS NNS
1,100-PARCEL-A-WEEK JJ
JANUARY NNP
ADORNED VBD VBN
HUMP-BACKED JJ
INNING NN
TEMPORARY JJ NNP
REDUNDANT JJ
COLLABORATIVE JJ
DOORNE NNP
OUTLAST VB
TRAINS NNS VBZ
RESERVE-DRAINING JJ
BRITOIL NNP
SINFONIA NNP
4,900 CD
MILSTAR NNP
LONG-RUNNING JJ
OBEDIENCE NN
CROZIER NNP
FOUR-PART JJ
CHEEK NN
WORKHORSE NN
SOMALI JJ NNP
GREATS NNS
NELSON-ATKINS NNP
BURCHETTE NNP
CHEER NNP NN VB
226,570,380 CD
REFRIGERATOR NN
CONVENIENCE NN NNP JJ
CHEEZ NNP
FISCAL-YEAR NN JJ
COVENANTS NNS
VALUATION NN
406,000 CD
NAMING VBG NN
BOARDS NNS
SHIPMENTS NNS
101-YEAR-OLD JJ
PHARMACIES NNS
SQUIRMING VBG
MOVIELAND NN
4.375 CD
CAR-DEALERS NNS
STRONGHOLD NN
FERRER NNP
FERRET VB
90.1 CD
CHEFS NNS
BROADCASTER NN
90.5 CD
90.6 CD
AVUNCULAR JJ
DURABILITY NN
PITNEY NNP
CHARLTON NNP
CANBERRA NNP
PRESIDIO NNP NN
BOGACHEVA NNP
FAIRFAX NNP NN
LEVINE NNP
STATUS-CONSCIOUS JJ
CROOKED JJ
CAPITULATED VBD
RICHARDS NNP
103,000 CD
RULING NN VBG JJ
PANTIES NNS
BOOKERS NNS
SAUCERS NNS
PIPELINE NN NNP
WINKING VBG
HAMPTON NNP
THWARTING VBG
SHORTSIGHTED JJ
4,930 CD
PREVENTATIVE JJ
AMBASSADOR NN NNP
RUSSEL NNP
DELTACORP NNP NN
PAYOUT NN
PREMIUM-PRICED JJ
SIMULATION NN
RUSSES NNP
GYPSUM NNP
BELGIUM NNP NN
RIGHT-HAND JJ
APPLICABILITY NN
9000 CD
NELSON NNP
HARVEY NNP
IDIOMATIC JJ
BALD-FACED JJ
MATHEMATICIAN NN
BOYFRIENDS NNS
MIDGETMAN NNP
FOUNDATION NNP NN
MENTIONING VBG
GUSTAFSON NNP
129.3 CD
CONSTRUCTIONS NNP NNS
129.6 CD
INTERESTS NNS VBZ
LASKER NNP
MYSTERIOUS JJ
MASATO NNP
CHEIL NNP
OFFICIOUS JJ
CHARISMATIC JJ
RIGHT-WINGERS NNS
ABUNDANT JJ
CARR-LOWREY NNP
LESS-THAN-SUCCESSFUL JJ
TEACHER NN
CAPOTE NNP
TEACHES VBZ
HUNDREDS NNS NNP
CINEMATOGRAFICA NNP
369,000 CD
GENTLE JJ
84-MONTH JJ
ADOPTED VBN VBD
STINGRAYS NNS
UNDECIDED JJ
VIEWPOINT NN
CARPETED VBD
FERRIS JJ
ULTRASOUND NN
OUTLAYS NNS
REAPPORTION VBP
GENTLY RB
ATOP IN
THREE-TON JJ
REGISTRANTS NNS
TRAITS NNS
LOWLY JJ
BUCKS NNS VBZ
CASTLEMAN NNP
RACE NN
ALTHOUGH IN
DISCOTHEQUE NN
FOKKER NNP
HEARST NNP
EMILE NNP
SLOW-GROWING JJ
RACY JJ
MICROPHONE NN
STEELMAKING NN
SOLEBURY NNP
MERKUR NNP
RUSSIA NNP
BODACIOUS JJ
ANTI-INTELLECTUAL JJ
HARVIE NNP
TOTALING VBG
WHEAT-GROWING JJ
ESTATE NN NNP
HEARTS NNS NNPS
RIVETING JJ
MANNING VBG
SOOTHING JJ VBG
HEARTY JJ
GOLDSCHEIDER NNP
INSURANCE-COST JJ
76.4 CD
ACCOMODATE VB
76.5 CD
WESTCHESTER NNP
76.6 CD
76.7 CD
76.8 CD
ELECTROLYSIS-OF-WATER JJ
76.9 CD
REVLON NNP NN
FOUNTAINS NNS
SCRAP VB NN VBP
ADAMSKI NNP
FOOD-FISH NNS
SCARCITY NN
EXUBERANCE NN
COMPLACENT JJ
TESTERS NNS
CONTACT NN VB NNP
UNDERWEIGHTED VBN
REDISTRIBUTING VBG
GREENING NN
GOVERNMENT-OWNED JJ
453.05 CD
IMPLORING VBG
RIFLE NNP
ABALKIN NNP
ROSELLE NNP
LEVITT NNP
ONE-PENNY JJ
DISASTER-RECOVERY JJ NN
CUBANS NNPS
COMMODITIES NNS NNP NNPS
TWO-FOOT JJ
RE-ENTERING VBG
EXPUNGED VBN
UNDUE JJ
REPAIRING VBG
SPIN-OFF JJ NN
PRE-REAGAN JJ
RAFI NNP
UNDERSIDE NN
TARDY JJ
CUMULATIVELY RB
MALLINCKRODT NNP
HEAVYWEIGHT JJ
CHENG NNP
SPINNING JJ VBG
4,995 CD
4,999 CD
RAFT NN
FINGER-POINTING NN JJ
HALVA-NEUBAUER NNP
DEFENSIBLE JJ
RESORTS NNS NNP NNPS VBZ
LABOR-FUNDED JJ
SELIG NNP
MATISSE NNP
REDISTRIBUTION NN
ADJACENT JJ
KRUTCHENSKY NNP
WELL-OFF JJ
EFFICIENCIES NNS
RAGE NN VB
JOGGING NN
CHANDROSS NNP
445.02 CD
BENEDEK NNP
LIVELIHOOD NN
AMUSEMENT NN
RAGU NNP
DOING VBG
VOLCANO NN
FREEWHEELING JJ
NASTIER JJR
FASHIONS NNS
INNOCENT JJ
VARIAN NNP
HASHING VBG
T-BILL NNP
RETARDANT NN
VIDEOCONFERENCING NN
RAHN NNP
STERILES NNS
FERRON NNP
DEFICIT-RACKED JJ
SNEAKING VBG
WORLDWIDE NNP
CATACLYSMS NNS
SPOT-TELEVISION JJ
LVOVNA NNP
NOLAN NNP
GENTRY NN
SHORTED JJ VBN
MEXICO-UNITED NNP
LOWRY NNP
CLARENCE NNP
LOW-LOAD JJ
RAID NN VB
RESEMBLES VBZ
SHORTEN VB
REJECTED VBD VBN
SHORTER JJR
INDIANAPOLIS-BASED JJ
RAIL NN NNP
RAIN NN VB
MANCHESTER NNP
POWERTRAIN NN
WIPEOUT NN
RISKIEST JJS
500-SEAT JJ
SWELLED VBD VBN
TREASURERS NNS NNPS
445.23 CD
WACHOVIA NNP
EMPLOYEES NNS NNP NNPS VBZ
PREMISE NN
DECIDING VBG JJ
RUDOLPH NNP
SELLS VBZ NNP
LADEN JJ
MIDAFTERNOON NN
LANGNER NNP
.270 CD
UNSCRUPULOUS JJ
75TH JJ
ZAMORA NNP
TENACIOUS JJ
HOME-IMPROVEMENT NN
DISCLOSING VBG
PRESERVED VBN VBD
461.70 CD
ADVERSARY NN
GREENISH JJ
ZAPOTEC JJ
453.57 CD
ELIMINATE VB VBP
HOLIDAYS NNS
SURPRISE NN VB RB JJ NNP
ADVANTAGES NNS
PRESERVES VBZ
SELF-AWARENESS NN
AIRPORT NN NNP
RAKE NN
PRIMAXIN NNP
MARKETPLACE NN NNP
VELCRO NN
CONTAIN VB VBP
COUNTERBID NN
APPRAISALS NNS
FRIEDRICH NNP
INTEREST-BEARING JJ
CHESS NN
CHEST NN
15-FOLD JJ
BEVERLY NNP
GOTTLIEB NNP
VARIED VBD VBN JJ
FINGER NN VB
HURRICAN NNP
REVEALING VBG JJ
PREMIUM NN JJ JJ|NN NNP
DOWNTURN NN
43,000 CD
EDELMANN NNP
NEPHEW NN
REFURBISHING NN VBG
VARIES VBZ
OMINOUS JJ
GRIPPED VBD
LACKEYS NNS
INJURE VB
NEWBORNS NNS
MONSANTO NNP
CONVENTIONAL-ARMS JJ NNS
DAMASCUS NNP
COOKE NNP
VOYEURISM NN
FRIPPERIES NNS
TOXIC-WASTE-DUMP JJ
STANDARDIZED JJ
COOKS NNS
RAMA NNP
INJURY NN NNP
NOTEWORTHY JJ
PRE-1917 JJ
SHEEHY NNP
HASHISH NN
DISTORT VB VBP
RAMO NNP
RAMP NN VB
NON-WARRANTY NN
NINE-MONTHS NNS
SCHWEPPES NNP
TRIGGER VB NN VBP
EMPIRICAL JJ
MEDICAL-CARE NN
195.19 CD
PROFESSIONS NNS
20-MEGABYTE JJ
NEUTRONS NNS
CANDACE NNP
COOLS VBZ
MEGABYTES NNS
HALF-ACRE JJ
RAND NNP NNS NN
COOLY RB
SAUERKRAUT NN
RANG VBD
WHIRRING VBG
FOREIGN JJ NNP
RANK VB NN NNP VBP JJ
IMPRESSIONISTS NNS NNPS
INKY-BROWN JJ
RIESLINGS NNPS
NEMESIS NN
POWERED VBN
SOFTENED VBN JJ VBD
ALERT VB JJ NN NNP
DROPPABLE JJ
CASTIGATED VBN
SLACKENING VBG
CHOJNOWSKI NNP
CHEVY NNP
FUND-RAISER NN
PRE-1933 JJ
SOFTENER NN
RECRUITED VBN VBD
BUOYANCY NN
SOLOIST NN
SEVENTEEN NNP CD
VALUE-BOOSTING JJ
DERAILING VBG
SIMPLEST JJS
RECRUITER NN NNP
OVERALL JJ RB NN NNP
CATHODE NN
CHEWS NNS
437.68 CD
INSPIRATIONAL JJ
COAL NN NNP
PEALING VBG
ALLUMETTES NNP
O'LINN'S NNP
COAN NNP
UNCONSTITUTIONAL JJ
COAT NN
RAPE NN
METICULOUS JJ
SUPERSONIC JJ
COAX VB
42-A-SHARE JJ
SHORTLY RB
MOFFETT NNP
EXHIBITED VBN
COBB NNP
CAPRICE NNP
PANAMA-BASED JJ
230-215 CD
MORAL JJ NNP
INTERPRET VB VBP
MORAN NNP
FULL-SIZED JJ
D.C. NNP
COBO NNP
DOOSAN NNP
18,000 CD
INSTRUMENTALISTS NNS
ENGLISH-SPEAKING JJ
BILLIONAIRE NN
DISRUPT VB
CLIMBERS NNS
FILMED VBN VBD
PIONEER NNP NN VB
MILEAGE NN
COCA NN
840,000 CD
GLOATERS NNS
BEHOLDEN JJ
VYQUEST NNP
STANDING-ROOM NN
CONVOCATION NN
SCHUMACHER NNP
CONANT NNP
VICTOIRE NNP
SHUNNING VBG
RARE JJ
PRE-1967 JJ
MESSRS. NNP NNPS NNS NN
HIDES NNS
BIPARTISAN JJ
VEDRINE NNP
JAPANESE-OWNED JJ
REVISED VBN JJ VBD
TEEMED VBD
GRAEDEL NNP
CITIZEN NN NNP
CODA NNP
MANAGEMENT-LABOR JJ
MB-339 NNP
CODE NNP NN VB
EIJI NNP
POPULAR JJ NNP
KRYUCHKOV NNP
INTENDED VBN VBD JJ
APPROACHING VBG
SCHABOWSKI NNP
RASH NN JJ NNP
BUREAUCRAT NN
314.09 CD
DOUBLE-B-MINUS\/B NN
95,142 CD
STOCK-OPTIONED JJ
AIRFIELDS NNS
CEASE-FIRE NN
PENNIMAN NNP
OFFENSIVES NNS
COED NN
SELVE NNP
IRONIC JJ
PREPARATION NN NNP
COEN NNP
ELECTIONS NNS
COORS NNP NNS
RATA JJ
CLICHE NN
SEARING JJ VBG
MONTGOLFIERE FW
TENFOLD RB
RATE NN NNP VBP VB
CAPPED VBD VBN JJ
TELLING VBG JJ
ECONOMIC-FORECASTING JJ
CHARGERS NNPS
ONEIDA NNP
PRINCIPAL-ONLY JJ
EPILEPTICS NNS
METALLGESELLSCHAFT NN NNP
40.21 CD
REMAINDER NN
RATS NNS
FORUMS NNS
SASEBO NNP
14-JUDGE JJ
PIRKO NNP
MORES NNS
QUAKE-PRONE JJ
PARRETTI NNP
MOREY NNP
BOTHERED VBN VBD
SAGA-LIKE JJ
POLICYHOLDER NN
RAUH NNP
UNCANNILY RB
REDEEM VB
WITHER VBP
SUHLER NNP
DISQUALIFIED VBN
WHIRPOOL NNP
RAUL NNP
THREE-PARTY JJ
BLODGETT NNP
TACKLED VBN
IRRELEVANT JJ
KITSCHY JJ
PENNSYLVANIA-BASED JJ
AMERICAN-DEVELOPED JJ
TACKLES VBZ
D.H. NNP
DISQUALIFICATION NN
REPOSITIONING NN
JAPAN NNP
BALANCE-SHEET NN
SWEATERS NNS
RAVE VB
STOCK-TAKING NN
86,500 CD
GATES-WARREN NNP
SELF-REGULATION NN
PARTIALLY RB
FAULTLESS JJ
PATENTED VBD VBN JJ
5,400 CD
RICOED JJ
176,100,000 CD
PRE-EMINENCE NN
RE-EXPORTS NNS
HIXSON NNP
24.05 CD
UNFULFILLED JJ
815,000 CD
CANVAS NN
ASWARA NNP
EMPLOYERS NNS NNP NNPS
LOATHED VBD VBN
MURDERS NNS
REMICS NNS
REVISIT VB
LUCIANO NNP
GRISWOLD NNP
PALAMEDES NN
CHAUFFEURS NNS
LOATHES VBZ
EYEBROWS NNS
NAKAMURA NNP
SUPERCONDUCTORS NNS
RAWL NNP
NAV:22.15 NN
40.50 CD
BOUND VBN JJ
24-MONTH JJ
MOUSETRAP NN
BIO-TECHNOLOGY NNP
UNANIMOUSLY RB
TERESA NNP
WHATEVER WDT
COIL NN
BREADED VBN
SOMBER JJ
GILBERT NNP
COIN NN NNP
IMELDA NNP
TEGAL NNP
IMMENSE JJ NN
DISTURBS VBZ
COMEUPPANCE NN
ANTI-PROGRAM JJ
POISONING NN
16.02 CD
16.03 CD
16.05 CD
24.25 CD
CLEANER-BURNING JJ
16.08 CD
16.09 CD
SCRUB NN
NOTEBOOK NN
MATRYOSHKA FW
AUDI NNP
EXTRUSIONS NNS
INSTRUCTED VBN VBD
CAREERS NNS
ANTIGEN NN
MARSHMALLOW NN
ANALGESIC JJ
SAXON NNP
PUSHERS NNS
SCRUM NNP
UNEVENTFUL JJ
SHEETS NNS
SURVEYING VBG
EIGHT-YEAR JJ
WANKUI NNP
WITHIN IN
SHIPYARDS NNS
CORPORATEWIDE JJ
11,742,368 CD
32.50 CD
MORRISON NNP
SCAMMED VBD
URETHRA NN
645,000 CD
INNER JJ NNP
SIEMIENAS NNP
16.18 CD
RAYS NNS
UNINSPIRED JJ
COKE NNP NN
CUNNINGHAM NNP
478.9 CD
COL. NNP
HOVERED VBD VBN
KEFFER NNP
WIDENING NN VBG
STANISLAV NNP
16.20 CD
224.1 CD
5,440 CD
16.22 CD
224.5 CD
16.25 CD
COLA NN NNP
40.86 CD
ANTICS NNS
KERR-MCGEE NNP
COLD JJ NN NNP
COLE NNP
COMMODITIZE VB
REINVESTMENT NNP NN
WINNINGEST JJS
34-FOOT-TALL JJ
COLI NNS
AMDAHL NNP
AUG. NNP
RERUN NN
COLO NNP
PAMPHLETS NNS
COMPETENT JJ
MEADOWS NNP NNS
COLS NNP
SHLOMO NNP
SARATOGA NNP
DISREGARD VB NN
UNACCOMPANIED JJ
NON-PREGNANT JJ
PILEVSKY NNP
86,555 CD
24.50 CD
PERFIDIOUS JJ
INCURSION NN
HARTFORD NNP
32.71 CD
GROUNDBREAKERS NNS
VARITY NNP
BOGART NNP
16.38 CD
HOVERING VBG
IN-CROWD NN
MELTZER NNP
COME VB VBN VBP VBD
398.3 CD
EGREGIOUS JJ
3427.39 CD
2082.1 CD
COMMUNITIES NNS
SUNLIGHT NN NNP
D.N. NNP
SHERREN NNP
SECOND-DEADLIEST JJ
144.1 CD
VISUALLY RB
16.40 CD
144.4 CD
475,000 CD
144.5 CD
SPIELBERG NNP
32.82 CD
NEWCOMER NN
144.9 CD
24.68 CD
GOLDBANDED VBN
CONE NNP
SIX-MILE JJ
249-166 JJ
CHOICE NN JJ NNP
STREAMLINING VBG NN
REFERENDUM NN
INSPECTORATE-ADIA NNP
CONN NNP
YEARBOOKS NNS
16.625 CD
CONS NNS
GRANGE NNP
EARTHQUAKE-TRIGGERED JJ
COLLECTIBLES NNS NNP
BABEL NN NNP
BUDDY NNP NN
SCULPTURES NNS
16.50 CD
16.56 CD
16.59 CD
FOUNTAIN NN NNP
32.99 CD
SPECTHRIE NNP
HOLIDAY NNP NN
THEN-SENIOR JJ
COOK NNP VB NN
BOUTS NNS
COOL VB JJ NN VBP
WEINROTH NNP
PATENTLY RB
O'BOYLE NNP
26-MAN JJ
MOTIFS NNS
ELECTION NN NNP
COOR NNP
BRIARCLIFF NNP
REINCORPORATING VBG
VOTER-REGISTRATION JJ
THEODORE NNP
YEARBOOK NN
SEAPORT NN
DE-EMPHASIZED VBN
16.66 CD
16.68 CD
LOUISIANA NNP
4.469 CD
COPE VB
CENTERPIECE NN
THOROUGH JJ
GRINDING VBG
FONDEST JJS
NO-FRILLS JJ
CHRONICLE NN NNP
VAPORS NNS
REIGNITED VBD VBN
COPY NN VB VBP NNP
TRAUMAS NNS
390-MILLION CD
OBSCENE JJ
ALTERNATIVE-FUELED JJ
16.75 CD
24.95 CD
BOARDROOM NN
BUDGE VB
91.2 CD
PURPORTS VBZ
91.7 CD
JURIES NNS
REINVIGORATED VBN
METHODS NNS
SAUTERNES NNP
RESTROOM NN
PACKING NN VBG
INDUSTRY NN NNP
KLIGMAN NNP
UNDERWHELMED VBN
16.88 CD
CORD NN
COUNTERED VBD VBN
CORE NN JJ NNP
EXECUTING VBG
DESERTED VBN
LAFARGE NNP
CORN NN NNP
D.S. NNP
COS. NNP NNPS
CORP NNP
84%-CONTROLLED JJ
ON-SET JJ
CORR NNP
RUSTED VBN
PRUDENTIAL NNP JJ
DISTRESSFUL JJ
ANTI-ABORTIONISTS NNS
SIANO NNP
FOLLOWED VBN VBD JJ
RETARDATION NN
SYMPATHY NN
REMIND VB VBP
FLUOROPOLYMER NN
ELEGANT JJ
U.S.-STYLE JJ
16.95 CD
MANACLES NNS
16.97 CD
FOLLOWER NN
DOSTOEVSKI NNP
COMMUTER NN
COMMUTES NNS
DEEPENING VBG
SHOUTING VBG NN
DUPLEX NN
55-ACRE JJ
GOTTSCHALK NNP
EXECUTION NN NNP
D.T. NNP
LOVELIEST JJS
FOOT-THICK JJ
PENNSYLVANIA NNP
COST NN VB VBD VBN VBP
17,699 CD
LOCAL-GOVERNMENT JJ
REVOLUTIONARY JJ NN NNP
FITZSIMMONS NNP
CREDITED VBN VBD
INSURANCE NN NNP
USUAL JJ RB
COTE NNP
BOYISH JJ
ACHIEVING VBG
MULTI-AGENCY JJ
KISSING VBG
AUNT NN NNP
A.J.C. NNP
24.875 CD
COTS NNS
ACTION-ADVENTURE JJ
ANTIPATHIES NNS
FEELING NN VBG
INSTRUCTOR NN
AUTOGRAPHS NNS
RIGHT NN RB JJ NNP
KEMPER NNP
GILDED JJ
BASEBALLS NNS
PACHOLIK NNP
RIGID JJ
IRANIANS NNPS
SEMEL NNP
COUP NN FW
GILDER NNP
NURTURED VBD VBN
HABITS NNS
THEN-DRESS JJ
12:01 CD
EVER-PRESENT JJ
CHEMICAL-WEAPONS NNS
ACCOUNTS NNS VBZ NNPS
12:06 CD
DRUG-APPROVAL JJ
12:07 CD
ASSOCIATION-COLLEGE NNP
MANIFESTO NN
JOHNNIE NNP
INCENTIVE-MAXIMIZING JJ
GRANNY NNP
ZUCKERMAN NNP
ELECTIVE JJ
JUROR NN
FORWARDING NN
CREDIT-BACKING NN
BRANCHED VBN
LOW-BUDGET JJ
COMESTIBLES NNS
PATROLLING NN
TRANSCRIPTS NNS
NINTH-CIRCUIT JJ
ASHORE RB
12:15 CD
RUSTIN NNP
KINGMAN NNP
BRANCHES NNS
TYING VBG
BIG-TIME JJ
77.2 CD
77.3 CD
MACRODANTIN NNP
SPEEDIER JJR
77.6 CD
ENCOUNTER VB NN
77.7 CD
MORPHOGENETIC JJ
NASIONAL NNP
RECHARGING VBG
COWS NNS
ELLIOTT NNP
BID-WANTED JJ
THOROUGHBREDS NNS
AURA NN
REMISS JJ
GRUPPE NNP
NAVFORJAPAN NNP
MOTION NN NNP
INTERVALS NNS
MAJORITY-OWNED JJ
HANIFEN NNP
BREADTH NN
SHOVING VBG
DISCOVERIES NNS
BARTON NNP
PHENOMENAL JJ
12:38 CD
ENGINEER NN VB
BLACKMUN NNP
UNOCCUPIED JJ
JOSEPHTHAL NNP
PEDIATRIC JJ NNP
VAGUE JJ
PREPOSITIONING JJ
LUGAR NNP
CONGRESS'S NNP
ARTILLERISTS NNS
POLYTECHNIC NNP
HACHETTE NNP
REY\/FAWCETT NNP
12:48 CD
12:49 CD
SWIMMING NN VBG
LISTINGS NNS
ANDOVER NNP
LUERSSEN NNP
HEAVIER-THAN-NORMAL JJ
EXECUTIVE NN JJ NNP
START-UPS NNS
AUTO NN NNP
APPLAUDS VBZ
91-23 CD
MEGA-STADIUM NN
HUNGARY NNP JJ
DOUBLE-DECK JJ
OBERSTAR NNP
DISPERSED VBD
QUARTER-TO-QUARTER JJ
IMPECCABLE JJ
COZY JJ
12:54 CD
AFRAID JJ
DESERT NN NNP VB
ATTEMPTED VBD VBN JJ
12.9375 CD
WOULD MD
ARGUING VBG
CONTRARIAN JJ
BARBER-GREENE NNP
MUTUAL-FUND JJ NN
TRACERS NNP
COVINGTON NNP
PRIME-TIME JJ NN
PRODIGY NN
KITCAT NNP
RIGOR NN
35,000-TO-$50,000 CD
SOURCING VBG
JUSTICES NNS NNPS NNP
HOSPITABLE JJ
SPRINKLED VBD
SHERIDAN NNP
ARABIAN NNP JJ
GRANTS NNS NNPS VBZ
THANKING VBG
YIELDING VBG JJ NN
LEBLANG NNP
INDEBTEDNESS NN
TASHI NNP
SPRINKLER NN
SPRINKLES VBZ
COMMITTING VBG
DOUBLE JJ VB RB VBP
INFECTED JJ VBN VBD
HEADLONG RB
FARM-TRADE JJ
CREDITABLY RB
RETIRING VBG
HIGH-PRESSURE JJ
INTERVENING VBG
A&E NNP
WOUND VBD NN VB VBN
TRILLION CD
ASSET-STRIPPING JJ
GOSSIPY JJ
DOUBLY RB
AGGRAVATE VB VBP
OPEN-DOOR NN JJ
WITHSTANDING VBG
A&M NNP
UNCONDITIONAL JJ
SUNBIRD NNP
ASPEN NNP
A&P NNP
NO-WIN JJ
MCCLATCHY NNP
SIGNIFY VB
NEARLY-30 JJ
ROLLBACKS NNS
RIGHT-TO-WORK JJ
A&W NNP
FLORAL JJ NNP
20-MINUTE JJ
RESET NN VB JJ
AMVISC NNP
BFREE NNP
PYROTECHNIC JJ
COSMETICS NNS NNPS
WOODWIND NN
TRAVERSE NNP
INSISTS VBZ
COUCHING VBG
BENIGN JJ
TRAVERSO NNP
A'S NNP
CREDITOR NN
813.4 CD
PROBODY NNP
NATURALIST NN
OVERBID VB VBD
PERCUSSION NNP
BECKER NNP
THIRTYSOMETHING NN JJ NNP
AFRIKANER JJ NNP
MOTIVE NN
MINIATURIZED VBN
60-INCH JJ
LIFELESS JJ
MARKETABLE JJ
INTERAGENCY NN
BELIEFS NNS
ART-ACQUISITION JJ
UNREAD JJ
JURIST NN
ELLIPTICAL JJ
DOUBLE-BLADED JJ
TASKS NNS
UNSAVORY JJ
SPEEDING VBG JJ NN
MICHAELCHECK NNP
GUTERMANN NNP
PERSECUTED VBN
CONVERSATION NN
APPROVE VB VBP
SELMER-SANDE NNP
SYDNEY-QINTEX NNP
INTELLECT NN
HENLEY NN NNP
CINEMAX NNP
CULMINATED VBD VBN
LOW-SLUNG JJ
UNDERWRITE VB VBP
BOASTS VBZ
2692.65 CD
GRUBEROVA NNP
COMPLAINING VBG
CULMINATES VBZ
UNREFRIGERATED JJ
ASPIN NNP
WALLETS NNS
PLOTTED VBD
MCALLEN NNP
INFORMALLY RB
DISCOVERING VBG
67-31 CD
SEMMELMAN NNP
RESIN NN
MID-STATE NNP
RACHWALSKI NNP
SHINGLE NN
CONSERVATORSHIP NN
CRUNCHED VBD
PHIL NNP
AMICABLE NNP JJ
CANELLOS NNP
AMBITION NN
LANGEVIN NNP
36-DAY JJ
LINKED VBN VBD
TRAGEDIES NNS
1,695,000 CD
GM-TOYOTA JJ
PERFORMED VBN VBD
RECLAIMED VBN
LAMBERT NNP
CPAS NNS NNPS
59-STORE JJ
SORROW NN
MODELING NN VBG
PERFORMER JJ NN
TRIPLED VBN VBD
GARRATT NNP
HALF-MEASURE NN
WRAP NNP NN VB
A-1 NN
VOWELS NNS
A-2 NN
PURPOSES NNS
TRIPLES NNS
A-6 NN
PENALTIES NNS
REGAINS VBZ
LATCHING VBG
TORCHMARK NNP
INDIFFERENT JJ
GENERATED VBN VBD
PESTICIDE-REFORM NN
A-D NNP
ADVANI NNP
EIGHT-PERSON JJ
PREFACE NN
TRUMAN NNP
POSNER NNP
LEGISLATE VB
GENERATES VBZ
RIGOROUSLY RB
NIGHT-VISION JJ
SPECIALLY RB
2676.60 CD
ABSTENTIONS NNS
SIGNING VBG NN
DOUBTS NNS VBZ
SWUNG VBD VBN
BUTTER NN
SELF-PROCLAIMED JJ
ABSORBING VBG
A.M RB NN
USURP VB
BEDRIDDEN JJ
RE-ENACTMENT NN
UNDERUTILIZED VBN
34,500 CD
PERCUSSIVE JJ
AFFECTIONATE JJ
FLORIO NNP
1601.5 CD
FOOD-IMPORTING JJ
MONDAY-MORNING JJ
COLONIAL NN JJ NNP
PAGING NN
MCGREGOR NNP
15\/16 CD
UNNERVING VBG JJ
CASH-OR-SHARES JJ
884,000 CD
SURFACING VBG
MARVELOUSLY RB
INCONGRUITIES NNS
HOOK-UP NN
SERVICING NN VBG
GUADALAJARA NNP
FLAGSHIP NN JJ
POST-CONVICTION JJ
HERRING NN NNP
18,136 CD
BAKKER NNP
WREE NN
SQUARELY RB
PHENOMENON NN
SHAMROCK NNP
70-A21 CD
PASCALE NNP
USHERS VBZ NNS
SISTER NN JJ
RUPTURED VBD JJ VBN
JAKARTA NNP
EXQUISITE JJ
SCOFFS VBZ
SHARDS NNS
LTCB NNP
SPECULATE VB VBP
INDOCTRINATED VBN
RECOVERS VBZ
IMAGINABLE JJ
SPRUILL NNP
VISIBLE JJ
ANNOYED JJ VBD VBN
RECOVERY NN NNP
ON-BOARD JJ
LTD. NNP
DIMINISH VB VBP
15\/32 CD
SHARED VBN VBD JJ NNP
REAPPOINTED VBN
ICONOCLASTIC JJ
TASTE NN VB VBP
VISIBLY RB
CATERS VBZ NNP
RECEPTOR NN
SEILER NNP
SHARES NNS VBZ NNP
EIGHTEEN CD
639.9 CD
HEATED JJ VBN
CREDIT-RATING JJ NN
DEADLIEST JJS
MCPHERSON NNP
LIVELIEST JJS
FURTHERS VBZ
TASTY JJ
61%-OWNED JJ
5,500 CD
SEVEN-POINT JJ
5,502 CD
PORTABLE JJ NN
HEATER NN
WEINGARTEN-SIEGEL NNP
APPLAUSE NN
SUGGEST VBP VB
EDGAR NNP
BAUERNFEIND NNP
SWEETENERS NNS
CHRONICLES VBZ NNS
26,350 CD
REPRESSED JJ VBN
PRIZED VBN JJ
3,481,887 CD
RENDERINGS NNS
DRENCHING NN
DESTROYED VBN VBD
TRUCKEE NNP
35500.64 CD
PRODUCERS NNS NNPS NNP
DISPATCHED VBD VBN
SOOT-STAINED JJ
MCCUTCHEN NNP
NEWSCASTS NNS
COLONIES NNS
MOSHE NNP
PRIZES NNS NNPS
MINDLESS JJ
TRUCKER NN
TESTIFIED VBD
DESTROYER NN
REDUCED-FAT JJ
BLABS VBZ
STEREOTYPICAL JJ
DISPATCHES NNS
UNHEARD-OF JJ
BLEACHERS NNS
AVCO NNP
ERASURES NNS
EXISTING VBG JJ
ROUND-THE-CLOCK JJ
TESTIFIES VBZ
HIGHER-MULTIPLE JJ
41.725 CD
KLINE NNP
MIDMORNING NN
TORIES NNP NNS NNPS
BELONG VB VBP
NIJINSKA NNP
EXPEDITE VB
SUTHERLAND NNP
APPARENT JJ
MCCOLLUM NNP
BLACK JJ NNP NN
305.7 CD
SPECIALTY-METALS NNS
LOYAL JJ
SHENZHEN NNP
FERTITTA NNP
WRIT NN
TREXLER NNP
SHEDDING VBG NN
MENTORS NNS
AVE. NNP
APARTMENT NN
ERITREANS NNPS
EUROBONDS NNS NNPS
RACKETEERING NN NNP VBG
LENIENCY NN
KLAUSER NNP
JEEPS NNS
SERVICE-ORIENTED JJ
BLADE NN
LICHTBLAU NNP
SLIVERED VBN
WRESTLING VBG NN
AVEC FW
MCGOVERN NNP
FIREFIGHTERS NNS
1,839,600 CD
360-DAY JJ
STONEMAN NNP
VIDEOCASSETTES NNS
OUTWARD RB
VILLAGERS NNS
479.7 CD
EMPLOYEE-MANAGEMENT JJ
2163.2 CD
SPECIALTY NN JJ NNP
2163.4 CD
REPRESENTIVES NNS
RESTS VBZ
CONFRONTED VBN
FEASIBILITY NN
EDGED VBD VBN
PRE-RECORDED JJ
225.5 CD
225.6 CD
MILLIGRAM NN
NO.3 JJ
225.7 CD
EXTRA-NASTY JJ
CONCURRENT JJ
TREMBLING VBG
GORMAN NNP
DROUGHT-INDUCED JJ
EVANS-BLACK NNP
1988-RETURN JJ
OFF-AGAIN JJ
EDGES NNS
GRANDPARENTS NNS
MICROAMERICA NNP
120,000 CD
SNEDEKER NNP
SCRIMMAGE NN
RECTANGULAR JJ
HATRED NN
AC-130U NN
CONTRACTED-FOR JJ
CAREFUL JJ
YALE-NEW NNP
SAYRE NNP
UNFIT JJ NN
GENERATOR NN
NONSENSE NN JJ
WRISTS NNS
SHARKS NNS
VAHID NNP
SADDLED VBN VBD
OUTPUT NN
FIVE-HOUR JJ
CONDOMINIUMS NNS
TRIANGLE NNP
COMMODITY-CHEMICAL JJ
CONTRIBUTING VBG JJ
THOUSANDS NNS
145.2 CD
BUTTON NN
BELIEVE VBP VB
145.4 CD
BRIBING VBG
ROSENAU NNP
ZEISLER NNP
145.7 CD
SCANDALS NNS
UTMOST NN JJ
COMFORTS NNS
STAINS NNS
DIRECTORIAL JJ
DOMINATED VBN VBD
INTERSTATES NNS
NOW-SHUTTERED JJ
342,122 CD
386,000 CD
TRANSMOGRIFIED VBD VBN
CLEANSED VBD VBN
HASBROUK NNP
PERPETRATED VBN
CONTRIBUTION NN
DEFENSE-ELECTRONICS JJ NNS
CIVILIZED JJ
DOMINATES VBZ
AVID JJ
READERS NNS
OWENS-CORNING NNP
RHAPSODY NN
INDEPENDANT JJ
FUNDING NN NNP VBG
VACATING VBG
DETECTORS NNS
CLEANSER NN
10,674,500 CD
JUST-ENDED JJ
AVIS NNP
GROFF NNP
AVIV NNP
REPUTED JJ VBN
35242.65 CD
0.01 CD
ADOLPHUS NNP
0.02 CD
0.03 CD
0.05 CD
UNIVISION NNP
0.06 CD
MUCH-PUBLICIZED JJ
HOPING VBG
0.07 CD
HAWKING VBG
BLAIR NNP
CUVEES NNS
FORGETTABLE JJ
ADVENTURISM NN
PREMIUM-BRAND JJ
VACATION NN
HAWKINS NNP
JOVANOVICH NNP
ALUMINUM-MAKERS NNS
ERBAMONT NNP NN
NEWSOM NNP
ALLIANCE NN NNP
QUICK-SERVICE JJ
BLINDS NNS
0.10 CD
WHIRLPOOL NNP
0.11 CD
UNREST NN
0.12 CD
0.13 CD
0.14 CD
LAUGHS VBZ NNS
0.15 CD
PRIZMS NNPS
NORIEGA NNP NN
0.16 CD
0.17 CD
0.18 CD
UNDERDRESSED JJ
5,599 CD
0.19 CD
SHARON NNP
92.2 CD
92.4 CD
92.6 CD
2149.3 CD
92.9 CD
LINKUP NN
BACHE NNP
WITHOUT IN
SCORING NNP VBG
EVALUATE VB VBP
EIGHTH JJ NN
AUSTERE JJ
REDEEMED VBN
GROHL NNP
FREMANTLE NNP
BLAKE NNP
0.20 CD
UNEDUCATED JJ
SPECIFIC-TIME NNP
0.22 CD
SHARPE NNP
0.23 CD
METAPHYSICAL JJ
0.24 CD
PURPORTED JJ
HAND-HELD JJ
0.25 CD
0.26 CD
0.27 CD
0.28 CD
DOWNPAYMENTS NNS
INDUSTRIALIZED VBN JJ
TRUMPS NNP NNPS
TWISTS NNS VBZ
CLOT-REDUCING JJ
ZHEJIANG NNP
SHARPS NNP
RYOSUKE NNP
HAMMACK NNP
CONTRACTORS NNS
BROWDER NNP
STAIRS NNS
U.S.-SUPPLIED JJ
228,000 CD
TECHNIQUES NNS
ESLINGER NNP
DIRECTORIES NNS
BEDPANS NNS
REGRESSIVE JJ
SHANGKUN NNP
LUCULLAN JJ
0.30 CD
0.31 CD
0.32 CD
BACKSTAGE RB
0.35 CD
GERMAN-BUILT JJ
0.36 CD
0.37 CD
VIDEOS NNS
0.39 CD
SUZUKI NNP
GENERALIST NN
EXPOSURES NNS
JOINING VBG
INWOOD NNP
MCMILLEN NNP
METAPHORS NNS
PROHIBITS VBZ
BLOCKADE NN
EXILE NN
GROUNDED VBN
MEDIA-BUYING JJ
ROLLS-ROYCE NNP
CLARIDGE NNP
APPLICANT NN
TAXLOW NN
CLASSED VBN
ANCILLARY JJ
WELL-MEANING JJ
BURZON NNP
BLAME VB NN VBP
0.43 CD
0.44 CD
0.45 CD
HYENAS NNS
0.47 CD
0.48 CD
ALGER NNP
WARBURGS NNPS
CLASSES NNS
WOVEN VBN
THEREBY RB
CHURCHES NNS
GENERAL-PRACTICE JJ
BACKE NNP
SEAWATER NN
OUTFIELD NN
LAWARE NNP
SENDS VBZ
DEMONIC JJ
UP-TO-DATE JJ
DRILLED VBN VBD
BLANC NNP
BLAND JJ
REMEMBRANCE NN
CANADIANS NNPS
0.50 CD
BACKS VBZ NNS
0.51 CD
VACANCY NN
COMBINATIONS NNS
0.53 CD
0.54 CD
INTIFADAH NN
BLANK JJ NN
0.55 CD
0.56 CD
REALESTATE VB NN
0.57 CD
BID-TO-COVER NN JJ
0.58 CD
RUTGERS NNP
0.59 CD
REMEMBERING VBG
HAWKISH JJ
INFLATIONARY JJ
CARNIVAL NNP NN
THREE-WEEK JJ
SEVERAL JJ
ROTATED VBD
CONTAMINATION NN
AVON NNP NN
STRAWBERRY NNP
488.60 CD
MEDFIELD NNP
OBSERVATORY NN
BUEKY NNP
0.60 CD
COMPOUND NN JJ VB
HIGH-FIDELITY NN
BESUBORU FW
0.63 CD
RESORT-CASINO NN
BILBREY NNP
0.65 CD
GRANITE NN
0.66 CD
MESSERSCHMITT-BOELKOW NNP
KICKERS NNS
ENGRAVED VBN
RE-CREACTIONS NNS
OPINIONS NNS
WEATHER NN VB VBP
SMALLER JJR
SIBRA NNP
MASTERPIECE NNP NN
LIFESPAN NNP
RESURGENCE NN
BUELL NNP
BIONDI NNP
AGRO-INDUSTRY JJ
ROZELL NNP
BOARDROOMS NNS
147,121 CD
GEAR NN NNP VB VBP
COMPTON NNP
EXTRAORDINARILY RB
REPLACEMENTS NNS
AAA JJ
0.70 CD
0.71 CD
CHICKENS NNS
0.73 CD
GAINERS NNS
0.75 CD
0.76 CD
SPLIT NN VBN VBD VB JJ
LIMPING VBG
78.4 CD
REGULAR JJ
78.6 CD
ROUND-TRIP NN JJ
HOLLANDALE NNP
MCMILLIN NNP
78.8 CD
200-RUBLE JJ
TELXON NNP
GIOVANNI NNP
31-CENT JJ
SCHWEIZ NNP
ERNESTO NNP
PRESIDENT\/NATIONAL-GOVERNMENT NN
NEGLECT NN
CLASSIC JJ NNP NN
FLARING VBG
BLINKS VBZ
ABA NNP
199,203 CD
LOWER-THAN-FORECAST JJ
HANDLING VBG NN
ALAMEDA NNP
ABB NNP
TECHNIK NNP
AFLATOXIN NN
ABC NNP
FANTASIA NNP
ELUDING VBG
ABE NNP
0.82 CD
0.84 CD
BUDGED VBN VBD
0.85 CD
VILLANOVA NNP
0.86 CD
MUSICIANSHIP NN
0.88 CD
0.89 CD
ABM NNP
RIVALRIES NNS
TRADE-OFF NN
ABU NNP
TRADE-LIBERALIZING JJ
EVOKE VBP
DECLARATORY JJ
BORDEAUX NNP
BEEFED VBD VBN
BUDGET NN NNP
BALLOT-BURNING JJ
MIYOSHI NNP
60,000 CD
BACON NN NNP
GROOM NNP
FISCHER NNP
0.91 CD
FLIP-FLOP JJ NN
ACE NN NNP
0.92 CD
SINO-U.S. JJ NNP
0.94 CD
0.95 CD
SEVERED VBN VBD
POTHOLES NNS
0.99 CD
TREADMILLS NNS
TRADING-RELATED JJ
ACT NNP NN VB VBP
UNDEVELOPED JJ
EXAMPLES NNS
ARDENTLY RB
GENERALIZE VB
PROVINCE NN NNP
ADA NNP
BLASE JJ NN
ADB NNP
ADD VB VBP
SHORT-SELLING NN JJ
MALTESE JJ
INATTENTION NN
OCTOPUS NNP
ADI NNP
RE-EMERGENCE NN
DHAWK NNP
1:30-6 CD
ADN NNP
ADO NN
OBSESSION NN
DEUTSCHE NNP NN FW
DIRECT-SELLING JJ
BLAST NN VB
WACOAL NNP
SWITZERLAND NNP NN
ADS NNS NNPS
HONORS NNP NNS
ADT NNP
TOUCHDOWN NN
91.21 CD
TWO-FOR-ONE JJ
OVERRIDE VB NN
INOUE NNP
AISLES NNS
BRACED VBN VBD NNP
NEDELYA NNP
RE-THOUGHT JJ
DISCUSSED VBN VBD
ACCOR NNP
WELL-PAYING JJ
IMPRACTICAL JJ
PALMOLIVE NNP
FRUIT NN NNP
EXIST VB VBP
AEG NNP
FLEETING JJ
THEREIN RB
HAPPENS VBZ
AEI NNP
373.40 CD
HERALD NNP VB VBP
GREENLAND NNP
WRAPPED VBD VBN
EMISSARIES NNS
AEP NNP
VESOFT NNP
373.48 CD
AER NNP
FRAYED VBN
FIXED-DOLLAR JJ
MIGRATIONS NNS
AEW NNP
GROTESQUE JJ
DIVERGING VBG
GRATIFICATION NN
S.GROVE NNP
CONSORTING VBG
AVOIDS VBZ
LONG-DEBATED JJ
PICK VB VBP NN
M.I.T.-TRAINED JJ
THOUSAND-PERSON JJ
BLACKMAILERS NNS
PICO NN
EXITS NNS VBZ
SUBCOMMITTEE NN NNP
MO.-BASED JJ
COVERTLY RB
DEEP-POCKETED JJ
HOSANNAS NNS
AFT JJ
TOP-NOTCH JJ
VINTAGES NNS
RICHMOND-SAN NNP
BOILING VBG
GONCHAROV NNP
GREENHOUSES NNS
AGA NNP
COURTING VBG
JALALABAD NNP
AGE NN NNP VBP
GROSS JJ NNP
AGF NNP
ERROLL NNP
B&H NNP
LOCATING VBG
365.46 CD
AGO RB IN
SHAREHOLDING NN
RESISTING VBG
DOSKOCIL NNP
PARAMUS NNP
LOTTER NN
BACKFIRED VBN VBD
AGS NNP
AUTOMOTIVE-EMISSIONS-TESTING JJ
GEHL NNP
SUPPOSITORY NN
SICKNESS NN
PLASTIC-BODIED JJ
35,000 CD
500.20 CD
EXPANDED VBN VBD JJ
COMMENTATOR NN
BACKFIRES VBZ
500.26 CD
NATURE NN NNP
UNPERTURBED JJ
PIER NN
ALGOM NNP
PIES NNS
LOCATION NN NNP
PURPOSEFULLY RB
LIFLAND NNP
ECLECTIC JJ NN
AHS UH
814.1 CD
ILLUSTRATIONS NNS
BENEFIT NN VB NNP VBP
LIBERATING JJ
75.25 CD
EKCO NNP
CONDUCTS VBZ
814.8 CD
EASTER NNP
CEMENTED VBN
YMCA NNP
GROUP NN NNP VB
AID NN VB NNP
DAVENPORT NNP
373.80 CD
OUT-OF-COURT JJ
UNCOMPENSATED JJ
ENVISAGED VBD VBN
AIM NN VB VBP NNP
PITCH NN VBP VB NNP
ASLEEP JJ RB
357.49 CD
CLINKERS NNS
303-107 JJ
HOUNDING VBG
AIR NNP NN VB VBP
WRITER NN
WRITES VBZ
990,000 CD
METHODICALLY RB
IMPULSE NN
PFIEFER NNP
AIW NNP
GROVE NNP NN
LIBERATION NN NNP
ABOLISHED VBN VBD
PREFERABLY RB
COUNSELS VBZ
UNEXPENDED JJ
PIGS NNS
GEIGER NNP
STRASSER NNP
CHOPPING NN VBG
EKED VBD
STOECKEL NNP
734.2 CD
BALTIMORE NNP
75.41 CD
STOECKER NNP
EXPRESSIONS NNS
734.8 CD
REASSIGNED VBD VBN
734.9 CD
BALLETS NNS NNP
THEREOF RB
GROWN VBN JJ
BLAZE VBP NN
THREE-FOURTHS JJ NNS
BIDERMANN NNP
BOWED VBD VBN
AKE NNP
GROWS VBZ
6,000 CD
NON-BINDING JJ
DISPLAYING VBG
GREAT-GRANDCHILDREN NNS
HOLIEST JJS
BOWEL NN
BOWEN NNP
AVERAGED VBD VBN
ANACOMP NNP
75.50 CD
TENSION NN
BOWES NNP
TRAMPING VBG
GUT-WRENCHING JJ
UNBROKEN JJ
GELL NNP
CAUSING VBG
BUSLOAD NN
EXHAUSTED VBN VBD JJ
250.17 CD
AVERAGES NNS VBZ
ALA NNP
FLOWER-INSCRIBED JJ
DISAPPEARANCE NN
ALE NN
NMTBA NNP
TWITCH VB
ALF NNP
STEEL-QUOTA NN
C'MON VB
ALI NNP
ALL DT PDT RB NNP RB|DT
MACHELLE NNP
FATALITY NN
PORTFOLIO NN NNP
67.40 CD
654.5 CD
SENS. NNP NNS
GEN. NNP
SOON-TO-EXPIRE JJ
ENCOMPASS VB
WHOLESALERS NNS
MEDITERRANEAN-INSPIRED JJ
SIEGLER NNP
GEMS NNS
GLACIAL JJ
ROOMETTE NN
400.0 CD
TOSSERS NNS
INDUSTRIA NNP
CONSORTIUM NN NNP
NODS VBZ
DUMPING VBG
400.3 CD
PETERBOROUGH NNP
INDEXING NN VBG
400.4 CD
INDUSTRIE NNP
AMI NNP
ERRORS NNS
EAGERNESS NN
ETHYLENE NN
SENSE NN VBP VB
GENE NN NNP
BONECRUSHER NNP
B-1 JJ
AMR NNP
B-2 NN NNP JJ
CIRCUMSPECT JJ
B-3 NNP JJ
AMT NNP
75.75 CD
AMY NNP
KATZENJAMMER NNP
GENO NNP
TATOR NNP
HIMEBAUGH NNP
NOEL NNP
TRACE NNP VB
AMATEUR JJ
ANA NNP
CROCIDOLITE NN
ANB NNP
ANC NNP
3COM NNP
AND CC JJ NNP NN VBP IN
GROUNDUP JJ
TRACK NN VB VBP NNP
REPRESENTING VBG
SEETHING JJ VBG
VERTICAL JJ
STAAR NNP
ANN NNP
TRACT NN
EXPANSIONARY JJ
1995-1999 CD
SIHANOUK NNP
SEMICONDUCTOR-DEPRECIATION JJ
ANT NN
TRACY NNP
MUBARAK NNP
TELEVISED VBN JJ
574.7 CD
SPACIOUS JJ
PRO-SELECTED JJ
34,215,000 CD
ANY DT RB
WRANGLING VBG NN
EQUITY-PURCHASE JJ NN
PILE NN VB VBP
WAKEFIELD NNP
PITHY JJ
MACMILLAN NNP
GREENHOUSE-EFFECT JJ
DISOBEY VB
AUCTIONEER NN
THERESE NNP
TRADE NN NNP VB VBP
PILL NN
FOREIGN-DEBT JJ NN
ROWLAND NNP
320.4 CD
JEALOUSLY RB
320.5 CD
STRINGENT JJ
AON NNP
59.50 CD
2.90-MARK JJ
HAMPSTER NNP
POWER-GENERATION JJ NN
VERACITY NN
67.75 CD
RCSB NNP
34,602 CD
COLLISION NNP
UNFORGIVING JJ
EMIGRATE VB
SHYING VBG
AVEDISIAN NNP
INHUMANE JJ
STACK VB
PIMP NN
6,050 CD
HUSTLERS NNS
SIGN-CARRYING JJ
FORGERY NN
MISBEGOTTEN JJ
HISPANICS NNPS NNS
494.4 CD
STACY NNP
APT JJ
APV NNP
494.8 CD
PLIANT JJ
PINA NNP
CHARACTERISTIC JJ NN
ARBITRAGEURS NNS
PINE NNP VBP
PING VB NN
ELAINE NNP
AXIOMS NNS
PINK JJ
DECREASING VBG
QUESTIONING VBG JJ
CORNICES NNS
GLACIER NNP
NEUTRALIZATION NN
PINS NNS VBZ
ASSISTANT NN JJ NNP
FINING VBG
240.8 CD
MOTEL NN NNP
PUBLIC-WORKS NNS JJ
GERD NNP
ALL-IN-ALL RB
MORRISTOWN NNP
3371.36 CD
UNSENTIMENTAL JJ
INDULGE VB
LUCE NNP
KANGYO NNP
WASTE-TO-ENERGY JJ
GERO NNP
FICKLE JJ
LUCK NN NNP
STRIPPED-DOWN JJ
AUGMENT VB
1,234,100 CD
UNHARMED JJ
ARA NNP
LABORIOUSLY RB
ARB NN
DEBORAH NNP
ARC NNP
PARCHED JJ VBN
CONTAMINATED JJ VBN
REMEMBERED VBD VBN
ARE VBP NNP NN IN
FORGETS VBZ
NEAR-PERFECT JJ
SEIMEI NNP
LUCY NNP
AWAD NNP
DECISION-MAKERS NNS
ACCUSATORY JJ
ARK NNP
ARM NN VB
CHOPPED VBN
INSITUTIONAL JJ
PORTLAND NNP
BOWLS VBZ NNP
ART NN NNP
PREMIUM-BEER NN
IMPOSITION NN
DEATH-ROW NN
BULSECO NNP
250.80 CD
PIPE NN NNP
AWAY RB RP
STAFF NN NNP VB
ASA NNP
CARRY-FORWARDS NNS
160.1 CD
5,600 CD
PROSPECTIVELY RB
160.4 CD
HAZARD NN
SOLZHENITSYN NNP
ASH NNP
WACKY JJ
ASK VB VBP
MICHIGAN NNP JJ
AK-47 NNP
CHRYSOTILE NN
BANK-BAITING JJ
AST NNP
87-STORE JJ
KALMUS NNP
UNWIELDY JJ
33.625 CD
GETS VBZ
WELL-CONNECTED JJ
STAGE NN VB NNP VBP
DECORATORS NNS
ROBOTS NNS NNP
KIERAN NNP
ATE VBD
HALF-FULL JJ
BOWNE NNP
CODPIECE NN
TRAIL NN VB VBP NNP
TRAIN NN VB NNP VBP
POQUET NNP
SUNDARJI NNP
HAMMERED VBN
BLASPHEMOUS JJ
TRAIT NN
INVALIDATED VBD
DELAMURAZ NNP
RETOOLS VBZ
FORGIVENESS NN
PRESERVE VB
SAMFORD NNP
PETROLIAM NNP
DIVERSIFIED JJ VBN NNP
MODESTLY RB
CARPETS NNS
YTTRIUM-CONTAINING JJ
RETRY VB
HEMORRHAGING NN VBG JJ
STAHL NNP
306.6 CD
MOTIF NN
EXHIBITS VBZ NNS
JOHANSON NNP
PARTY-GIVING NN
METHOD NN
GILDA NNP
TWENTY-FIVE CD
INSPIRATIONS NNS
GEVA NNP
CARLOS NNP
CROSBIE NNP
AMBULANCE NN
AUS NNP
CONCUR VB
PISA NNP
STAID JJ VBN
BIODEGRADABLE JJ
JOHNNY NNP
RUPTURE NN
HYDRAULICALLY RB
AVA NNP
THREE-LAWYER JJ
FASTEST JJS
BURGERS NNS
LUGS NNS
AVE NNP
STAIN VB
AVI NNP
FINISH VB NN VBP
AWED JJ
STAIR NN
INPEX NNP
ZOETE NNP
EVAPORATION NN
SEVERE JJ
INHERITANCE NN
MIAMI-MADRID NNP
TEICH NNP
AVX NNP
NONE NN NNP
REFRESHINGLY RB
ENTREPRENEURS NNS
GILES NNP
334,000 CD
BURGESS NNP
226.3 CD
226.5 CD
FINITE JJ
CLIENT NN
4.625 CD
PITS NNS VBZ
PITY NN
HALF-HOUR NN JJ
NAUGHTIER JJR
REPORTAGE NN
BARTENDERS NNS
UNDERGRADUATE JJ NN
STAGGERING JJ VBG
PARDONED VBD
HIGHEST-YIELDING JJ
ARAMID NN
ANIMAL NN JJ NNP
FODDER NN
STAKE NN VB
BECAUSE IN RB
FLUTING NN
201,028 CD
NOON NN
AXA NNP
O.P. NNP
LESS-DEVELOPED-COUNTRY JJ
LUIS NNP
5,651 CD
AMSTERDAM-ROTTERDAM NNP
OVERBLOWN JJ
AXE NNP
GRAPES NNS
DALTON NNP
TRAMP NNP NN
SISULU NNP
TRUNKS NNS
MARGEOTES NNP NNS
WHATSOEVER RB
REASSURED VBN VBD
DOLAN NNP
DECELERATED VBN
NOPE UH
CLIENTS NNS
FUNN-IH JJ
FRIGATES NNS
FRENCH JJ NNP NNPS NNS
RANDOLPH NNP
STALE JJ
HANDBOOKS NNS
MISJUDGMENTS NNS
MCKINZIE NNP
DARKNESS NN
146.3 CD
146.6 CD
STALL VB NN
146.8 CD
TEMPERAMENT NN
INFAMOUS JJ
IMPLIED VBN VBD JJ
NEANDERTHAL JJ
STALS NNP
RIFKIND NNP
GEZA NNP
QUARTERBACKS NNS
TRANS NNP
SEGMENTATION NN
SOYBEAN NN
UNSEEMLY JJ
HYDE-TO-JEKYLL JJ
IMPLIES VBZ
BOEING NNP VBG
RODOLFO NNP
HERDS NNS
CARLTA NNP
LOW-INCOME JJ NN
INFORMS VBZ
GULBUDDIN NNP
BARBERTON NNP
STOOGES NNS
NEWS-ORIENTED JJ
NAIROBI NNP
STAMP NN VB
DOLCE FW
103.05 CD
NICOLAS NNP
TOPPED VBD VBN
CRIME-INFESTED JJ
AZT NNP
NORA NNP
NORC NNP
JOHNSTON NNP
ATTRIBUTE VBP NN VB
GIRAFFE NNP
BUDAPEST NNP JJS
LULL NN
EARTHQUAKE-RELATED JJ
TOPPER NNP
STAND VB VBP NN
EPO-TREATED JJ
VALLADOLID NNP
NORM NN NNP
COMMEMORATED VBD
NOS. NNS
2.79-TO-1 CD
OUTSIDERS NNS
GRAPHS NNS
TRAPS NNS
DIRECT-MARKETING NN
DIVERS NNS
HERBAL JJ
DIVERT VB VBP
CHOKED VBD VBN
LODGED VBN VBD
STRICTER JJR
MOTOR NNP NN
BADGE NN
STRANDED VBN
NOSE NN
STUMBLING VBG JJ
BUFFS NNS
PARISHIONERS NNS
FEDERAL-SYSTEMS JJ
TARNISH VB
CAVIN-MORRIS NNP
MUCH-BELOVED JJ
NEWTON NNP
HOUSEHLD JJ
LUMP NN
FIVE-CONSECUTIVE JJ
AIR-SEPARATION NN
REALLOCATED VBN
TACTICAL JJ NNP
TREMBLOR NN
DOLED VBD
5,699 CD
93.1 CD
REFITTING VBG
EXOTIC JJ
93.2 CD
111.48 CD
93.3 CD
ENDLESS JJ
DIVEST VB VBP
93.5 CD
93.7 CD
93.8 CD
LUND NNP
93.9 CD
NOTE NN VBP VB
LUNG NN NNP
GASTRO-INTESTINAL JJ
STAPF NNP
AFTERNOONS NNS
WONDERS VBZ NNS
RENTERS NNS
INDECISIVE JJ
CROONED VBD
LARCENY NN
STINGERS NNPS
DESERVED VBD
FACTORY-JOBS NNS
SEATBELT NN
CROONEN NNP
CONSOLIDATED NNP JJ VBN VBD
60-TO-65-DAY JJ
TALK-SHOW NN JJ
PANTRY NN
DESERVES VBZ
NOV. NNP NN VB
TRASH NN VB
TOPICALITY NN
MEMORIALIZED VBN
DYLAN-INFLUENCED JJ
SWALLOWING VBG
FRENCH-LANGUAGE JJ
CONSOLIDATES VBZ
KOIZUMI NNP
F\/A-18 NN
KNOTTY JJ
FIRED VBN VBD
CITIZENSHIP NN
SEVEN-YEAR-OLD JJ
REVOKE VB
MOROCCO NNP
RESTRUCTURINGS NNS
NOVA NNP
IGNORAMUS NN
BOUNDING VBG
OVERRIDING VBG JJ
FIRES NNS VBZ
78-YEAR-OLD JJ
MORTGAGED VBN
STARE VBP
PLAYED VBD VBN
GOODFRIEND NNP
STARK JJ NNP
BLATANT JJ
PEDDLING VBG NN JJ
MORTGAGES NNS
STARR NNP
STARS NNS VBZ NNP
PLAYER NN NNP
START VB NN VBP NNP
CUSTOMER-SERVICE JJ
SETTINGS NNS
GASOLINE NN
SINKING VBG NN
METHYL NN
SIEBEL NNP
YUGOSLAV-BORN JJ
ALEXANDRIA NNP
TACITLY RB
STUDENTS NNS
REVOLT NN
LITTERED VBN
BUREAUCRACIES NNS
TRAUB NNP
NIGERIA NNP
HILDEBRANDT NNP
STASH VB
EXPLAINS VBZ
STUDIOUSLY RB
HERSHISER NNP
BROWNE NNP
LURE VB NN VBP
IMPLICIT JJ
BROWNS NNP NNPS
69,980 CD
16-NATION JJ
STATE NN NNP VBP VB
GARPIAN JJ
HISTORIC JJ
MODERNIZING VBG
ALFALFA NN
QUELLE NNP
GENUINE JJ
BADLY RB
CUTLER NNP
CUSHMAN NNP
RICHEST JJS
CHUCKLES VBZ NNS
INFORMATIONAL JJ
REGARDING VBG
TOPPLE VB
THIRD-HIGHEST JJS
PARIAH NN
BA3 JJ NN
PEACHES NNS
LUSH JJ
SPRING-EARLY JJ
FORGINGS NNS
TAX-EXEMPTS NNS
BAD JJ RB NNP
BAG NN
HEMISPHERE NN NNP
ROSE-GOLD NN
INTIMIDATED VBN
BURNOUT NN
LAURENCE NNP
79.1 CD
79.2 CD
BAM UH
BAN NN VB VBP
MADRID NNP
79.3 CD
79.4 CD
BAR NN NNP VB
COUCH-POTATO NN
BAT NN
PROTESTED VBD VBN
BAY NNP NN
STRICTLY RB
BRUTISH JJ
OCCASIONS NNS
STAVE VB
HOUSECLEANING NN
BBB NNP
PROTESTER NN
LITTLE-KNOWN JJ
VOYAGE NN
CURRAN NNP
DORRANCE NNP
LUTZ NNP
SORTED VBN
POWDER NN NNP
HERBIG NNP
BBN NNP
103.98 CD
BIOGRAPHERS NNS
ENGINEERED VBN JJ NNP
UNPLUG VB
FALLING VBG NN
LAXATIVE NN
DOLLS NNS
MULTIBILLION-DOLLAR JJ
AWRY RB JJ
PLASTICS NNS NNPS
LAUDERHILL NNP
BCE NNP
EMPORIUM NNP
BCI NNP
CONCILIATORY JJ
TRAYS NNS
CENSORED VBN
BOTTOMING VBG
SCHULER NNP
VACCINE NN
HARDBALL NN
INTERJECTS VBZ
CORES NNS
HERON NNP
RAMPAGE NN
OVERTHROWN VBN
INTERBANK NN NNP JJ RB
HACKERS NNS
FLOWERS NNS NNPS
COREY NNP
TAKUMA NNP
REDEPLOY VB
15,000-FOOT JJ
OVERSUPPLY NN
SUBSTANTIAL JJ
CONSEQUENTLY RB
TREMORS NNS
IMMEDIACY NN
BROWSE VB
ARIZONA NNP
BDO NNP
RE-ELECTION NN
DEDUCT VB
PLACATE VB
KIPPUR NNP
PROPERTY-TAX JJ
PRE-SPLIT JJ
TIMBERLAND NN
SOMEBODY NN
TREADS VBZ
GILTS NNS
UNITRODE NNP
BED NN
HEINHOLD NNP
BEE NNP
THOROUGHFARE NN
BEG VB
AERIAL JJ
FIRMA NN
INPUT NN
EXPLONAFT NNP
FRENCH-GOVERNMENT-OWNED JJ
AMATEURISH JJ
BEL NN NNP
STAYS VBZ NNS
BEN NNP
SLOPES NNS VBZ
GENTLENESS NN
BET NN VB VBD VBP RB NNP VBN
BATTISTA NNP
COMPUTE VB
MOUNTAINTOP NN
BEW NNP
BRILLIANT JJ
FIRMS NNS NNPS NNP
DEMOGRAPHIC JJ
UNDER-PERFORMING JJ
ALTRUISTIC JJ
BUFFETED VBN
PONDERING VBG
SANITIZE VBP
PERVERT NN
FRAZER NNP
CONNOTATION NN
WEAKENS VBZ
DERIDED VBD VBN
ENSCONCED VBN
KNEES NNS
FROSTED NNP
OCTANE NN
KEYLESS JJ
ELAN NN
STOCK-INDEX-FUTURES NNS
TEITO NNP
PLASTIC-BODY JJ
BOGDAN NNP
LUNDAY NNP
C&D NNP
GIAMATTI NNP
MAHONEY NNP
ROLE-PLAYING NN
COMPLAIN VBP VB
72-HOUR JJ
C&P NNP
ILL-GOTTEN JJ
ROOFERS NNS
BERMUDA NNP
SCANDALIOS NNP
GRAVEYARD NN
ZEIGER NNP
WITHDRAWALS NNS
SECURITIES-BASED JJ
REVIEWING VBG
ALTRUISM NN
MATHEWSON NNP
MORALISTIC JJ
MAXTOR NNP
AFFAIRS NNS NNP NNPS
CIRCULATED VBD VBN
CHAMPIONS NNS
ELCO NNP
CAR-HAPPY JJ
ALL-WHITE JJ
EMPLOYMENT NN NNP
ANYPLACE RB
HERTZ NNP
OGILVYSPEAK NNP
BID NN VB VBD VBN VBP NNP
LOADINGS NNS
1.5463 CD
SUMMONS NN
REFUSAL NN
BIG JJ NNP
TAKURO NNP
COVETOUS JJ
THOMPSON NNP
BIN NN
BIP NNP
TUTORING VBG
GERRYMANDERING NN
CENSORSHIP NN
APPREHENSIONS NNS
35527.29 CD
BIT NN RB JJ
STOPPAGE NN
WALTCH NNP
747-400 NNP JJ
UNDATED JJ
MIYATA NNP
BENEFITED VBD VBN
DISTRACTED VBN VBD
GREECE NNP
UNAMBIGUOUS JJ
EXTENDED VBN VBD JJ
NEWMARK NNP
PROTAGONIST NN
MISREPRESENTATION NN
RETURN NN VB VBP JJ
TSUNAMI NN
PROMULGATED VBD
ANIMALS NNS NNPS
KAMAL NNP
CONCURRENTLY RB
ADJUDICATOR NN
CHAMPIONING VBG
RAMPANT JJ
WEAKEST JJS
ELECTRONICS-INSTRUMENTS JJ
DAVISON NNP
CARMEL NNP
CARMEN NNP
REVIVAL NN
SHERIFFS NNS
COMMON-LAW NN
COMMERICAL JJ
EDMUND NNP
AWFUL JJ
GREEDY JJ
BOXER NN
DANIELS NNP
BOXES NNS NNPS
PROFESS VBP
BUGGING NN
AMMONIUM NN
COPLANDESQUE JJ
SUBMINIMUM JJ NN
DRIVEN VBN JJ
FIRST JJ NNP RB LS NN JJS CD
DRIVER NN
DRIVES NNS VBZ
95,400 CD
WALTER NNP
INDUCING VBG
SYMBIOTIC JJ
STEEL-CASTING JJ
APATHETIC JJ
IGNORANCE NN
VESLEFRIKK NNP
CRAB NN
SIMPLIFICATION NN
SELF-HELP NN
PRYCE NNP
MISSED VBD VBN
NEWSREEL NNP
WAREHOUSE-CLUB NN
CRAP NN
FOUR-DAY JJ
WINTERTHUR-BASED JJ
GRIGOLI NNP
SCREAMS VBZ
REFUSED VBD VBN
CRAY NNP
BMA NNP
LOWERED VBD VBN
BMC NNP
MISSES VBZ
SCHULOF NNP
KNELL NN
FINANCIALS NNP
DUNTON NNP
BMI NNP
INTENSELY RB
REFUSES VBZ
BMP NN NNP
PARING VBG
ONCOGENES NNS
CORP. NNP NN
SELF-FULFILLING JJ
ROLLERS NNS
3\/16 CD
BMW NNP
BABIES NNS
SIMILARITY NN
ARCHED JJ VBD
MILION NN
LEFT-WING JJ
SHINING VBG NNP
SPALDING NNP
1948-89 CD
MANAGEMENT-CONSULTANT NN
ARCHER NNP
U.S.-U.S.S.R. NNP
FALLIBLE JJ
RALEIGH NNP
ARCHEY NNP
BNL NNP
ELIE NNP
575.1 CD
SHIELDED VBD VBN
OCTAVE JJ
WHITEHALL NNP
C-S NNP
POPULOUS JJ
CORPS NNP NN FW
CONSECUTIVE JJ
SLYKE NNP
PHOTOFINISHING NN NNP
KAMEL NNP
RECESSION NN
EXECUTIVE-BRANCH JJ
2596.72 CD
ENTOMBED VBN
BOA NN
BOB NNP
REVIVED VBN VBD
HIGH-GLOSS JJ
ORCHESTRAL JJ
CLIFFS NNPS
OUTAGES NNS
BOG VB
OUTOKUMPU NNP
321.5 CD
NORTHAMPTON NNP
HOLDERBANK NNP
5.125 CD
ORCHESTRAS NNS
FRENZY NN NNP
BON NNP FW
CONDOM NN
PAYROLL NN NNP
3\/32 CD
QUAKE-SHOCKED JJ
CONDOS NNS
ABANDONS VBZ
FIXTURE NN
FOOT-DRAGGING NN
BOW VB VBP NN
SEOUL NNP
ANNUITY NN NNP
BOX NN NNP
BOY NN NNP UH
WINE-BUYING JJ
SOUP-TO-NUTS JJ
MCFALL NNP
OPERATE VB VBP
OVERREACTED VBN
GIMMICKS NNS
PREDICATED VBN
HARPENER NNP
BPC NNP
176-ITEM JJ
5.133 CD
STAKED VBN
CLAIMANTS NNS NNPS
SLYLY RB
NATIONALISM NN
CREE NNP
RABBIT-TEST JJ
INFRASTRUCTURE NN
NATIONALIST JJ NN
SLOPPY JJ
PLASKETT NNP
STAKES NNS
SIDAK NNP
MINSTREL NN
CORRY NNP
CREW NN NNP
MANNINGTON NNP
230-PERSON JJ
241.6 CD
241.7 CD
ELLA NNP
241.9 CD
KELLWOOD NNP
ELLE NNP
789.87 CD
SCENTED JJ
MULTI-COLUMN JJ
LONG-SUFFERING JJ
JAMAICA NNP
DOMENICI NNP
AUDREY NNP
ZEHNDER NNP
SINFUL JJ
78,600 CD
HIGHS NNS
42.375 CD
SPUTTERING JJ
BRA NN
THREE-DIGIT JJ
SCHULTE NNP
MICHELANGELOS NNPS
GREEKS NNPS
FOUR-GAME JJ
MONOLOGUES NNS
TOSHIYUKI NNP
FARFETCHED JJ
HEAVED VBN VBD
SCHULTZ NNP
400TH JJ
WELL-RUN JJ
HEAVEN NN
161.1 CD
BSB NNP
OSTENSIBLE JJ
5,700 CD
SYNERGIES NNS
161.3 CD
161.5 CD
HEAVES VBD
MYRTLE NNP
DEUKMEJIAN NNP
5.163 CD
161.8 CD
BSN NNP
FORGERIES NNS
OSTENSIBLY RB
HIGHEST JJS RB RBS
RESTATING VBG
ADDICTED VBN JJ
CATCH-22 NN
1940-1987 CD
78,625 CD
PARITY NN
SUPRAVENTRICULAR JJ
SPLITTING NN JJ
DEVOURED VBN
CRIB NN JJ
RE-EXAMINATION NN
METING VBG
DUCKLINGS NNS
BONNET NN
FRACTIONALLY RB
BTR NNP
SIDED VBD VBN
PREDICT VBP VB
FLOURISH VB
SAVAIKO NNP
IMMEDIATE JJ NNP
TREATS VBZ NNS
REDISTRIBUTE VB
GREENE NNP
SIDER NNP
SIDES NNS
TREATY NN NNP
OVERDUE JJ
307.2 CD
SVENSKA NNP
BUD NNP
OKUMA NNP
SUBVERTS VBZ
BUG NN
CONSORTIUM-OWNERSHIP NN
WESTBURNE NNP
CARMON NNP
307.9 CD
MODERNIZATION NN
DOWN-PAYMENT NN
ADROIT JJ
GREENS NNP NNS
BUM NNP
APPLES NNS JJ
RANDOMLY RB
PROMOTE VB VBP
ATTACHMENT NN
BUS NN NNP
BUT CC IN RB NNP
EXTRAORDINARY JJ
THRESHOLD NN
CHESEBROUGH-POND NNP
BUY VB VBP NN JJ VB|NN
SCRATCHED VBN
INDIRECT JJ
DRIVON NNP
ORGANISMS NNS
MIDSIZE JJ
TENTHS NNS
SOUTHWESTERN NNP JJ
SUPERFICIALLY RB
DECENTRALIZED JJ VBN
ARROGANT JJ
FUEL-INJECTED JJ
240SX NNP
SCOOPING VBG
PROPOSALS NNS
SPY-CHASING NN
TIME-HOTELS NNS
SCAMPER VBP
REPURCHASING VBG
BOCKRIS NNP
RADZYMIN NNP
DISTRESSING JJ
112,000 CD
EXECUTE VB VBP
CONTESTS NNS
CHI-CHI JJ
17.375 CD
RIDDLED JJ
227.1 CD
FALTERING VBG
EX-HURLER NN
227.3 CD
BREAD-AND-BUTTER JJ
COORDINATING VBG NNP
CRAWLED VBD
CLEARING NN VBG NNP
MATURING VBG
TESTIFY VB VBP
PER-SUBSCRIBER NN
TAMPER VB
801.21 CD
SPREADSHEETS NNS
BARBARA NNP
WRITTEN VBN JJ
SELECTIONS NNS
BUDGETING NN NNP
ADVANCE-PURCHASE JJ
SOVIET JJ NNP
PAYSON NNP
INTERNATIONALISTS NNS
BONNIE NNP
SPIKED JJ VBN
MEROLA NNP
GRAND-JURY JJ NN
182-DAY JJ
COORDINATION NN
ELSE RB JJ NN
PATIENT-PHYSICIAN JJ
ESPECTADOR NNP
COLLECTED VBN VBD
MOURNING VBG
DOMAN NNP
WATERED-DOWN JJ
GRAYING VBG NN
60%-HELD JJ
REVERBERATE VB
SUBSTANTIVE JJ
RHYTHM NN
PRYOR NNP
INQUISITION NNP
RADIO-STATION NN
5,760 CD
147.5 CD
147.6 CD
HART-SCOTT-RODINO NNP JJ
FIFTEEN CD
UNRELATED JJ
RECONSTRUCTED JJ VBD VBN
ANARCHY NN
CHICO NNP
BEGHIN-SAY NNP
MECHANISMS NNS NNPS
BOOKING NN VBG
TUMULT NN
GREENVILLE NNP
TYLER NNP
WHOLESALER-DISTRIBUTORS NNP
REMINDS VBZ
GLUCOSE NN
FLUOROPOLYMERS NNS
KOREANS NNPS
BOLTED VBN
MOTLEY NNP
LEMING NNP
LUSTER NN
PEASANTS NNS NNPS NNP
OUTLOOKS NNS
5,773 CD
MOUND NN
TAPERED JJ
FARENTINO NNP
ESTELI NNP
TREASURIES NNS
SEQUESTERED VBN
DISHONESTY NN
OVERHAULED VBN
MOUNT VB NNP VBP
DELIGHTS VBZ
CROP NN VB
FLOTTL NNP
LOPUKHOV NNP
ALREADY-SIZABLE JJ
OUTHWAITE NNP
CROW NN
OLD-TIME JJ
BUNDESBANK NNP
MICROCHIP NN
CHIEF JJ NN NNP
MUNICIPALITIES NNS
COMPARATIVELY RB
CONFEDERATION NNP NN
5,782 CD
AFRICANIST NNP
ENDEAVORS NNS
GREETS VBZ
RICHFIELD NNP
NUANCES NNS
OUTLETS NNS
WEAKLING NN
PUSILLANIMITY NN
ZARNOWITZ NNP
UBIQUITOUS JJ
GOVERNMENTAL-AFFAIRS JJ NNS
INCOME NN NNP
CHABROL NNP
PRO-CONSUMPTION NN
COSTLY JJ
STUMPF NNP
CHOLET NNP
IMMINENT JJ
5,791 CD
TWO-DAY JJ
CLERGY NNS
DIRTIEST JJS
MEETING NN VBG
OUTSOLD VBD
MOINES NNP
PERIPHERAL JJ
94.2 CD
FIRST-AMENDMENT JJ
94.3 CD
94.4 CD
94.5 CD
SOPHISTICATION NN
94.6 CD
ACIDIFIED VBN
SCARSDALE NNP
94.7 CD
CORNUCOPIA NN
94.8 CD
94.9 CD
VICTIMIZED VBN
DOMES NNS
GRUSIN NNP
FORESHADOWED VBN
GLASSWORK NNP
ALICE NNP
AMTRAK NNP
AMTRAN NNP
SCANDAL-PLAGUED JJ
BREAKNECK JJ
AYALA NNP
MONSOON NN
2.3125 CD
32-ACRE JJ
CUISINE NN NNP
OCCUPY VB
CHEERFULLY RB
GEOCRYOLOGY NNP
NUCLEAR-WEAPONS JJ
TOEPFER NNP
PROPERTY-CLAIM NN
PHOENIX NNP
ALIDA NNP
COUNTS VBZ NNS
STRETCH NN VB VBP JJ NNP
MATURITY NN
FOREIGN-CURRENCY NN JJ
BEASTS NNS
COUNTY NNP NN
SMOKED VBD
UNALTERED JJ
ANACHRONISMS NNS
2600.88 CD
ENVIRONMENTALISM NNP NN
UNDERGROUND JJ RB NN
RHETORICAL JJ
KILOWATT NN
MINDED VBD
SMOKES VBZ
ENVIRONMENTALIST NN
CENTURIES NNS
SWISS-CHEESE NN
2.41-TO-1 CD
LACKING VBG JJ
HAPPENING VBG NN
MINDEN NNP
READ VB VBN VBP VBD NNP NN VBP|VBD VBD|VBP
TESTING NN VBG NNP VBG|NN
CORRELATE VBP
ENERGY-EFFICIENT JJ
REAL JJ NNP RB NN
BACKLOGS NNS
WATERGATE-BELEAGUERED JJ
REAP VB VBP
ALIEN JJ NN
MOUSE NN NNP
REAR JJ NN
OCCURS VBZ
913-864-3982 CD
POST-HEARING JJ
CONCOCTED VBN
OFFER NN VB VBP
STOCK-TRADER NN
BERTHOLD NNP
AMITAI NNP
57-YEAR-OLD JJ NN
WEDNESDAYS NNS
INASMUCH RB
MAESTRO NN
DON'T VB
COUPON-EQUIVALENT JJ
U.S.BASED JJ
CLERKS NNS
IMPLEMENTATION NN
COSSIGA NNP
TOSHIBA NNP
QUANTUM NNP NN
GAINS-TAX JJ
ACTORS NNS
SIMPLIFY VB VBP
LOW-INTEREST JJ
MOUTH NN NNP
15-ACRE JJ
TYCOONS NNS
FIVE-MEMBER JJ
SCHUMAN NNP
INGESTION NN
WAYMAR NNP
BRONISLAVA NNP
RECRUITMENT NN
CRUM NNP
CONSENTING VBG
TURNBULL NNP
DISAPPOINT VB
JASON NNP
IAFP NNP
TUMBLEDOWN JJ
INTERPUBLIC NNP
EXISTANCE NN
CRUZ NNP
TRANQUILITY NN
CANYON NNP
DURING IN
UNDISCIPLINED JJ
INTELLECTUALLY RB
ALIGN VBP
CHRYSLER NNP
3,111,000 CD
STANDARD NNP JJ NN
BARROOM NN
CA. NNP
NOTEHOLDER NN
STEINHARDT NNP
GREENWALD NNP
CATHRYN NNP
REDA NNP
FISHBOWL NN
U.S.BACKED JJ
JEOPARDY NN NNP
CLEAR-CUT JJ
REDE NNP
COSBY NNP
LAWSON-WALTERS NNP
CHILD NN NNP
CHILE NNP
CAA NNP JJ
CAB NN NNP
CONFUSIONS NNS
MCCARRAN NNP
CAC NNP
CAE NNP
REDO VB
WTVJ NNP
CHILL NN VB NNP
REDS NNS NNP
ADVERSELY RB
ESTONIAN-LANGUAGE JJ
CAN MD NN
THUMBS NNS VBZ
ENACTED VBN VBD
CAP NN NNP VB VBP
PESETAS NNS
ESTIMABLE JJ
CAR NN NNP
CAT NNP NN
SECOND-GUESSED VBN
ATHLETE-PAYOFF JJ
CATHAY NNP
RAPESEEDS NNS
PLENTY NN RB JJ
DISMISS VB VBP
RISC-BASED JJ
OVERTEGA NNP
CAY NNP
110.625 CD
REED NNP
WHIPSAWING NN
REEF NN NNP
2,888,000 CD
MUFFLED VBN
52,000 CD
COLLECTOR NN NNP
SINGER NN NNP
CONSOLIDATIONS NNS
VOLUMES NNS
SIECKMAN NNP
CBI NNP
PLENUM NN
MUFFLER NN
ALTERNATIVES NNS NNP
BASEL-BASED JJ
SPONSOR NN VB VBP
293.29 CD
CBS NNP
527.39 CD
GUENTER NNP
MORRIS NNP
INFERIOR JJ
830.5 CD
CALIFORNIA-BACKED JJ
ZILLION NN|CD
CHINA NNP NN
52,012 CD
SPEWED VBD
WTXF NNP
1.5500 CD
CCD NNP
ASSAB NNP
SPRUCING VBG
ASSAD NNP
COMPLETIONS NNS
BOLTON NNP
CAPACITY-EXPANSION NN JJ
CHINN NNP
CHINO NNP
FISKE NNP
VAGABONDS NNP NNS
FHA-INSURED JJ
SCHUMER NNP
UNICYCLE NN
FOLLOWERS NNS
SELF-INDULGENT JJ
HEYMAN NNP
PRODIGIOUS JJ
ALIKE RB
SYRIA NNP
CDA NNP
MANALAPAN NNP
CDC NNP
SECRETLY RB
RESOURCEFUL JJ
INMATES NNS
CDL NNP
7:13 CD
THEN-AIR JJ|NNP
CDS NNS NNPS NNP
CDT NNP
CDU NNP
RETIREMENT NN NNP
DISTASTE NN
BEACH-HOUSE NN
EDITA NNP
FOREMAN NN
RUSH-HOUR JJ
EDITH NNP
1.5523 CD
AMBIGUITIES NNS
FERVOR NN
EXPORT-BOOSTING JJ
SHASHLIK NN
CHIPS NNS NNP NNPS
CEO NNP NN
35015.38 CD
WELLCOME NNP
JELINSKI NNP
WITCHING NN
PUZZLEMENT NN
CONSERVATIVELY RB
8300S NNS
REVCO NNP
MIDDLESEX NNP
COMMUTERS NNS
REID NNP
CURSED VBD
LANDFILL NN NNP
SINGIN VBG
CFC NNP
ANTI-RACKETEERING JJ
CFD NNP
REIN VB NN
BROOKINGS NNP
TENACIOUSLY RB
CREMONIE NNP
WALK-IN JJ
MORBIDITY NN
RUBDOWNS NNS
7:30 CD
RESPONDENTS NNS
CURSES NNS
BELIEVING VBG
FUNCTIONS NNS
DUPONT NNP
RE-EVALUATE VB VBP
URGENCY NN
670.3 CD
EXUDED VBD
PAPPAS NNP
27,000 CD
PAY-PER-VIEW JJ
SHRANK VBD
ASSAULT-WEAPONS JJ
LOW-RATE JJ
D&B NNP NN
GUSHES VBZ
CUSTOMER-ACCESS NN
RIGGED VBD VBN
MANKIEWICZ NNP
DINNERS NNS
RECOGNIZABLE JJ
CENTURION NNP
HESSE NNP
PRICE-SLASHING JJ NN
34903.80 CD
LEASEWAY NNP
BEAUBIEN NNP
CONTAGIOUS JJ
REVEL VBP
ASSES NNS
ASSET NN NNP
DISLOYAL JJ
TROUGHED VBD
MADSON NNP
FACADES NNS
VERALDI NNP
SOLOMON NNP
RECOGNIZABLY RB
FOXMOOR NNP
DEFINED VBN VBD
VALIANT JJ NNP
CHE NNP
NONUNION JJ NNP
CHI NNP
INCITING VBG
DELIRIOUSLY RB
REGALIA NNP
HOLLIDAY NNP
HAMMERING VBG NN
DIVIDED VBN VBD JJ
7:53 CD
BEATING NN VBG
TOSHIKI NNP
MOUNTED VBD VBN
FULHAM NNP
SLAPPING NN
DEFINES VBZ
ILLEGALLY RB
SINGLE JJ VBP VB NN
MONAHAN NNP
CHW NNP
590.7 CD
OUTSET NN
WHENEVER WRB
MORROW NNP NN
DISINTEGRATED VBD
DIVIDES VBZ
TELECOM NNP
COLLEGIAL JJ
MABON NNP
CIA NNP
PORTUGAL NNP
KINGPIN NN
CIE NNP
POWELL NNP
DEMOLITION NN
SINGLY RB
REESTABLISH VB
PRUDENCE NN NNP
WELL-TRAVELED JJ
SEMIMONTHLY RB|JJ
CIM NNP
GERMAN JJ NNP
RELY VB VBP
MEDICATION NN
CIT NNP
CLIMBING VBG
PRETENSE NN
PAYCHECK NN
TANTALIZINGLY RB
FIFTH-GENERATION JJ
DISADVANTAGE NN
FUTURES NNS NNPS NNP
DANGLED VBN
SUISSE-FIRST NNP
PRESSURING VBG
BURIALS NNS
GRANDCHILDREN NNS
GLOATING VBG
UNENDING JJ
IMPLICATE VB
LOW-BASE-PRICE JJ
120,000-EMPLOYEE JJ
REMY NNP
UNPROVABLE JJ
HIGHLAND NNP
283-132 JJ
JARGON NN
COTTON-GROWING JJ
GELATIN NN
ROWLAND-MOLINA NNP
RENE NNP
SPROUT VBP VB
3648.82 CD
RENK NNP
420.68 CD
BACKLOTS NNS
RENO NNP
INSURANCE-INDUSTRY NN
IMPENETRABLE JJ
RENT NN VB NNP
PINPOINTED JJ VBN
HONORABLE JJ
FRIDAY NNP
COMMAND NN NNP VB VBP
YIELDED VBD VBN
1,784,400 CD
BOYER NNP
CARNEY NNP
MORE-DISTINCTIVE JJR
UNASSUMING JJ
DOCTRINES NNS
RE-CREATIONS NNS
PENNVIEW NNP
TRADING-COMPANY NN
HONORABLY RB
FACILITATING VBG
QUAYLE NNP
WEINBERG NNP
REP. NNP
UNCONSCIOUS JJ
COPYING NN VBG NNP
TREBLE NNP
JANSEN NNP
HOLLYWOOD NNP
SMOKEHOUSE NN
CHARGING VBG NN
656.5 CD
SHEIKS NNS
FISTS NNS
MELTDOWN NN JJ
CONTEND VBP VB
YOUNGSTOWN NNP
420.81 CD
WIRELESS NNP
REFUTED VBD
YOGA NN
ASSET-SALE JJ
MISTER NN
64-YEAR-OLD JJ
SHEILA NNP
YOGI NNP
402.4 CD
MEDIOCRITY NN
BROADENING VBG
ALITO NNP
REPS NNS
CONTENT NN JJ VB
402.7 CD
CML NNP
COMMERCIALIZING VBG
IATA NNP
HULLABALOO NN
CMS NNP
REVOKING VBG
OVERCHARGE NN
EXECUTIONS NNS
COUNTERVAILING VBG
SEPT. NNP NN JJ
EXPRESS NNP VB VBP JJ NN
154.05 CD
TAILOR-MADE JJ
REFERENCE NN NNP
3398.65 CD
REDIAL VB
NEAR-UNANIMOUS JJ
CNA NNP
PRINT-SHOP NN
DILEMMA NN
APPRAISERS NNS NNPS
HEINOUS JJ
CNN NNP
FORTHCOMING JJ
CO. NNP NN
SWEATING NN VBG
1,384,119 CD
SAUCES NNS
CHOLESTEROL NN
FORREST NNP
EMIL NNP
CNW NNP
CUBAN JJ NNP
REFERENDA NN
BEATEN VBN JJ
INEXPLICABLE JJ
CROOKS NNS
ALIVE JJ RB
MISPLACED VBN
EMPLOYING VBG
COB NNP
FIASCO NN
D.C NNP
OVERWHELMING JJ VBG
COE NNP
STEREOTYPED JJ
RAPANELLI NNP
STOCKARD NNP
EICHLER NNP
322.7 CD
PALMATIER NNP
COM NN NNP
BLANCHARD NNP
SVENTEK NNP
POWERS NNS NNP
CON JJ NN VB RB
TRIBUNAL NN NNP
GEORGETOWN NNP
ROLL-CALL NN JJ
COP NN
COMPILING VBG
INEXPLICABLY RB
D.S NNP
COS NNP NNPS
D.T NNP
STEREOTYPES NNS
FURNISHED VBN JJ
COW NN
ELLIOT NNP
COX NNP
COY JJ
BAYONNE NNP
FINAGLING NN
U.S.-DOLLAR NN
170.65 CD
NAUTILUS JJ
CPC NNP
COUNTERATTACK VB NN
CPI NNP
RESS NNP
REST NN VB VBP VB|NN
5.237 CD
6,256 CD
SYRUP NN
SKR1.5 NNS
ARRANGEMENTS NNS
CPU NN
496.7 CD
INITIATIVES NNS VBZ
POUGHKEEPSIE NNP
EXAMPLE NN
MASTERGATE NNP
FOREMOST RB JJ NNP
STALEY NNP
170.75 CD
CIVIL-RIGHTS NNS
GRO-LITES NNPS
YOKE NN
FILBERTS NNS
MOVED VBD VBN
PUSHING VBG
CSFB NNP
242.8 CD
5.245 CD
ENTREPRENEUR NN
FINANCIAL-AID NN
MISSILE-GUIDANCE JJ
CLAMORED VBD
MOVES NNS VBZ
94,425,000 CD
18,444 CD
NON-CALL JJ
CROONS VBZ
UNICE NNP
PLEDGED VBD VBN
29-YEAR-OLD JJ
STAMPINGS NNS
CRA NNP
FLOTILLA NN
COSTA NNP JJ NNS
REV. NNP
PAYROLL-TAX NN
UNICO NNP
CRI NNP
300-DAY JJ CD
AL-CHALABI NNP
BIOLOGISTS NNS
BASKETBALL-CUTBACK NN
EMMA NNP
CONTEST NN VB NNP
PERENNIALLY RB
PLEDGES NNS VBZ
INSIDER-TRADING NN JJ
CRS NNP NNS
SNAIL-LIKE JJ
CRU NNP
JACQUES NNP
COSTS NNS VBZ
MONEY-WISE JJ
DEFINITELY RB
CRY NN VB VBP
REVA NNP
COMPREHENSIVENESS NN
UNIDA NNP
FREAKED VBN
GETTING VBG
162.1 CD
CSC NNP
ANTI-TAKEOVER JJ NN
162.3 CD
FIGURING VBG
ABSTINENCE NN
CAFFEINE-FREE JJ
SMALLER-STOCK JJR
WILLIAMS NNP
UPTIGHT JJ
CANDELA NNP
QUARTERLY JJ NN RB
CSS NNP
RISIBLE JJ
CST NNP
CSV NNP
KANJI FW
INCESSANTLY RB
INDENTURE NN
CSX NNP
NACHMANY NNP
PLEASURES NNS
LONG-DELAYED JJ
CONFIRMED VBD VBN
ABSURDITY NN
504,200 CD
LOONIES NNS
CTB NNP
5,810 CD
INTRUDE VBP
CANCER-SUSCEPTIBLE JJ
134,750,000 CD
5.276 CD
TRIPOLI NNP
FASTEST-GROWING JJ JJS
HAND-SIZED JJ
STALIN NNP
PEDESTRIAN NN JJ
CORP.-TOYOTA JJ
30-NOV. NNP
U.S.-MEXICO JJ
LOW-COST JJ NN
CUB NN
CHIUSANO NNP
CUE NN
TELELAWYER NNP
5,824 CD
MOVIE NN NNP
SURGEON NN NNP
CUL NN
COERCES VBZ
YOON NNP
WESTPORT NNP
CUP NNP NN
SYNCHRONOUS JJ
UNIFY VB
CUT VB NN VBN VBD VBP JJ NNP
FINALISTS NNS
DESPISE VB
BREZINSKI NNP
PIVOT VB
DEGENERATIVE JJ
PROMPTS VBZ
PALE-BLUE JJ
MORE-ATTRACTIVE JJ
326,000 CD
80%-OWNED JJ CD
JAPANESE-SUPPLIED JJ
SOBER-FACED JJ
CVB NNP
UNETHICAL JJ
BAYERISCHE NNP
OVULATION NN
MCMAHON NNP
PREPAYMENT NN
CUBIC JJ
AMOUNTS NNS VBZ
CVN NNP
GARDENER NN
AUGUSTINES NNPS
THIRD-BIGGEST JJ
CRACKED VBN VBD
SIEGE NN NNP
DESPITE IN
NON-VOTING JJ
AYER NNP
APPELLATE-COURT NN
WITHROW NNP
EXCAVATED VBN
CATCH-UP NN
CLINTON NNP
F-14 NN
TOWN-HOUSE NN
F-15 NNP NN
HISHAM NNP
F-16 NNP NN CD
CRACKER NN
RANCHO NNP
CWA NNP
F-18 NN
LAHUS NNP
READY-TO-WEAR JJ
DISSENTERS NNS
CONTEXT NN
COMPETING VBG JJ VBG|JJ
ACCOUNTING NN NNP VBG JJ
SEPT.30 CD
PARALLEL-COMPUTING JJ
STALLS NNS VBZ
F-20 NNP
HIGH-RATE JJ
AFFLICT VB
FUNCTIONARIES NNS
4,631,400 CD
EMPLOYMENT-SERVICES JJ
UNCONSOLIDATED JJ VBN VBD
SPELLING NN VBG
HERNANDEZ NNP
YORK NNP
RYUKICHI NNP
FASTBALL NN
ON-RAMPS NNS
FIRST-THREE JJ
SURGERY NN
GINGL NNP
CONJECTURE NN
NON-CASH JJ
KANON NNP
156,000 CD
33.875 CD
AGREEMENT NN NNP
STAPLETON NNP
AFTERSHOCKS NNS
PERPLEXING JJ
CYD NNP
148.5 CD
DIARIES NNS
YOSI NNP
148.9 CD
AFGHANISTAN\/SOUTHWEST NNP
HUMPTY NNP
EQUILIBRIUM NN
ACCUSTOMED VBN JJ
ANDES NNPS
TRANSISTORS NNS
ATTRIBUTING VBG
YOST NNP
SELF-SUFFICIENCY NN
STOVALL\/TWENTY-FIRST NNP
FRENCH-SPEAKING JJ
FINANCIAL-MARKET NN
PRICE-LEVEL JJ
CHOLESTEROL-LOWERING JJ
DEPENDED VBD VBN
PREMNER NNP
TORMENTS VBZ
ALCESTE NNP
GROWTH-AND-INCOME JJ
ENDURE VB VBP
BRIEFCASE NN
HOROWITZ NNP
PUNCHERS NNS
BRONCES NNP
PARALLEL JJ NN VB RB
MAKE-WORK NN
LETTER NN NNP
HASSLES NNS
LADDERED JJ
WARDED VBN
27-A-SHARE JJ
BARILLA NNP
SINGLE-ISSUE JJ
FEE-FORFEITURE NN
FEDERALLY RB
REDING NN
DESIGN NN VB NNP
BALLOTING NN
UNPEACE NN
FIVE-WEEK JJ
BEDEVILED VBN
QUINTUPLE RB
DEPLETED VBN VBD
BACK-PAY NN
BATTALION-2000 NN
KORANDO NNP
YOUR PRP$ JJ
CARLSON NNP
FALCON NNP NN
RESERVOIRS NNP NNS
DEPLETES VBZ
HIGH-LEVERAGE JJ
DESIGNATED VBN NNP
750-CAR-A-DAY JJ
EMIRATES NNPS NNP
CLEMENSEN NNP
JUILLIARD NNP NN
CELICA NNP
NONVOTING JJ
PRUNING NN
4.875 CD
DESIGNATES VBZ
DUELING NN VBG
BONOMO NNP
95.1 CD
STATIONARY JJ
CAT-AND-MOUSE JJ
FITCH NNP
95.2 CD
LIFEBLOOD NN
95.4 CD
55-MEGAWATT JJ
FOOT-TALL JJ
95.6 CD
95.7 CD
WHITES NNS
95.8 CD
95.9 CD
GRIFFITH-JOYNER NNP
WHITEY NNP
WHOLE JJ NN RP
CRANING VBG
SWEET-NATURED JJ
DOWNTRODDEN JJ
LARCHMONT NNP
METWEST NNP
SUPPLEMENT NN VB
MANIPULATE VB VBP
SIENA NNP
DAWKINS NNP
COOPERATIVES NNS
CRACKLE VBP
RELATING VBG
BRITTLE JJ
SERGEANT NN
NEANDERTHALS NNS
28%-OWNED JJ
UNLOVELY JJ
EVREN NNP
UNDERPERFORMERS NNS
RANCOR NN
155.039 CD
DWARFS VBZ
THRUSTING VBG
UNION NNP NN
BEATTY NNP
4.898 CD
SIXTH-LARGEST JJ
STICK-AND-CARROT NN
VALUE-ADDED JJ
5-FOR-24 CD
RELATION NN
GR8FLRED NNP CD
RESCISSION NN
DISTRIBUTORS NNS NNPS
BRADSTREET NNP
MORSEL NN
CHARTERED JJ VBN VBD NNP
TENURE NN
SPILLS VBZ NNS
NAMEPLATE NN
35586.60 CD
REFOCUSED VBN VBD
WAKABAYASHI NNP
BROKEN-DOWN JJ
PARSIPPANY NNP
IBEW NNP
PIZAZZ NN
MANSIONS NNS
THREADS NNS
OPINION-MAKERS NNS
NAIVETE NN
PETULANT JJ
REFOCUSES VB
GORBACHEV NNP
36-YEAR-OLD JJ
JANSZ. NNP
WEIGHTINGS NNS
AT-BAT NN
TWO-DIMENSIONAL JJ
NIXDORF NNP
LONGEST JJS NNP
A-BODY JJ
1,800-A-YEAR JJ
BRITTON NNP
HIROSHIMA NNP
TWIN-ENGINE JJ
1,063,946 CD
SUICIDE NN
UNIONISTS NNS
PROGRAM-DRIVEN JJ
LESS-INTRUSIVE JJ
EXCAVATOR NN
SINGLE-PREMIUM JJ
ALTOGETHER RB
GRUNDFEST NNP
NEIGHBHORHOODS NNS
IRRATIONAL JJ
PERIODS NNS
MIDLAND NNP
ENHANCEMENTS NNS NNP
NECESSITATED VBD VBN
TRANSNATIONAL JJ
DISTRACT VB
2782.30 CD
TRANSFORMED VBN VBD
SPOIL VBP
TRACING VBG
DAD NNP NN
DAE NNP
DAF NNP
INTERDEPENDENCE NN
DISSENTS NNS
ACCRUALS NNS
DAM NN
PROGRESSING VBG
ANTI-DEFENSE JJ
DAN NNP
CHICAGO-AREA JJ
SPECULATORS NNS
POEME NNP
NO-CONFIDENCE NN
DAT NNP
ORIGINAL-EQUIPMENT JJ
ATHLETE-STUDENT NN
DAX NNP
DAY NN NNP
MINNEAPOLIS NNP NNS
OUTLEAPED VBD
HARDIMAN NNP
UNITE VB
EXPIRING VBG
MACHO NN JJ
ROLAIDS NNP
REBIRTH NN
DBL NNP
UNITS NNS NNP
6\/2 CD
ESPRIT FW
INFORMAL JJ
MEHARRY NNP
TRAMPLED JJ VBN
UNITY NN NNP
1,874,000 CD
ABC-TV NNP
ADVANCED-TECHNOLOGY NN JJ
0.0002 CD
MASSAGE NN VB NNP
0.0003 CD
SPOKE VBD
WHOSE WP$
STRATEGIC-ARMS NN
FLABBERGASTED VBN
SEMESTER NN
SUPERVISED VBD JJ VBN
PERCEPTIONS NNS
BORROWINGS NNS
OFF-BALANCE JJ
WILDLIFE NN NNP
ROASTED JJ
320-200 CD
MILKED VBN
BRONCOS NNS
SUPERVISES VBZ
PRECOCIOUS JJ
ERECTED VBD VBN
AUTHORED VBN
BIOPSIES NNS
MANUFACTURED VBN VBD JJ
MILKEN NNP
O'CONNELL NNP
STRENGTHEN VB VBP
WHINNEY NNP
0.0015 CD
IAMBIC JJ
JOKINGLY RB
0.0018 CD
SYMPTOM-FREE JJ
REBORN JJ
LIFELINE NN
STEADY JJ RB
RESPECTABLE JJ
DDB NNP
PLAN NN VBP VB NNP
25-CENT-A-SHARE JJ
MANUFACTURER NN NNP
HERRMAN NNP
ALADDIN NNP
PREADMISSION NN
MANUFACTURES VBZ
MISUNDERSTOOD VBN
INTERVENE VB
DONNA NNP
DDI NNP
INSOFAR RB
PLAY VB NN VBP NNP
PARKED VBN VBD
CHISHOLM NNP
SIGHTSEEING NN
RELATIVE JJ NN
PERKINS NNP
DESIRE NN VBP
CEMETERY NN NNP
FURRIER NN
751.4 CD
INEXPERIENCED JJ
INDICTED VBN VBD
PARKER NNP
HIGH-COST JJ
DEA NNP NN
ANDRE NNP
OHARA NNP
DEB NNP
DOOLING NNP
DEC NNP
MANAGEMENT-BY-OBJECTIVE NN
ANALYZING VBG NN
BUTCHER NN NNP
DEE NNP
CAMBODIA NNP
DEI FW
6,500,000 CD
DEL NNP FW DT
BRAND-NAME JJ NN
DEN NN NNP
SOVIET-STYLE JJ
AC&R\/CCL NNP
TRANSPLANTS NNS
DER NNP NN JJR
DES NNP FW
CONFER VB VBP NNP
DEW NN
COINCIDENT JJ
AMITYVILLE NNP
VERBALLY RB
DONOR NN
THEORISTS NNS
BROWNELL NNP
OVERDEPENDENCE NN
CRESCOTT NNP
INVITING VBG
MOST-CONTENTIOUS JJS
DESIST VB
RECOMMENDS VBZ
DFC NNP
AIR-POLLUTION NN
LEGIONS NNS
CHIPPING VBG
INFORMED VBN VBD JJ
PURPLE JJ NNP
SACRAMENTO-BASED JJ
EDUCATE VB
SELF-SEEKING JJ
0.0040 CD
LESS-EDUCATED JJ
AMBIGUAN JJ
UNHEALED JJ
INTER-COMPANY JJ
CONFIDENTIALITY NN
TAILING VBG
GIULIO NNP
0.0047 CD
ENGULFED VBN VBD
WRITHING VBG
SPOOK VBP
DONNING VBG
SPOON NNP
CHEERED VBD VBN
ASTEC NNP
2,205,000 CD
HAKUHODO NNP
COLORADO NNP
FEISTY JJ
BEQUEST NN
SAMOVAR NNP
SPANKING JJ NN
COLLAR NN
STOCK-SPECIALIST JJ
PLEA NN VB
LOWER-COURT NN
SOYBEANS NNS NNPS
MISMANAGEMENT NN
STANDBYS NNS
0.0055 CD
STOCK-PURCHASE JJ
EXPECTANT JJ
PATENT NN NNP JJ
PRISONER NN
AUTOGRAPHED VBN JJ
UNAFFECTED JJ
BORDEN NNP
ENCOUNTERED VBD VBN
AUTOBIOGRAPHICAL JJ
MAGARITY NNP
BORDER NN NNP
WAFAA NNP
CRAFTSMEN NNS NNPS
817.5 CD
FOCAL JJ
CONCISION NN
BIGGEST JJS
FINLEY NNP
HIGH-ALTITUDE JJ
TASCHER NNP
MACON NNP
DID VBD
DIE VB VBP NN
EXPRESSED VBD VBN
DIG NNP VB NN
PROGRESSIVE JJ NNP
DIP VB NN
EXPRESSES VBZ
ENDO NNP
ENDS VBZ NNS NNPS
DOONESBURY NNP
0.0075 CD
DISAGREEMENTS NNS
GUILDER NN
ADDICTION-TREATMENT JJ NN
WATCHDOG NN
PERITONEAL JJ
ABRUPTLY RB
CURTIN NNP
SPORT NN NNP
CALIFORNIA NNP JJ
750TH JJ
OVERSTAFFED JJ
YANK-ORIENTED JJ
CURTIS NNP
CINEMATOGRAPHY NN
MINERA NNP
FURNISHING VBG
LIQUEFY VB VBP
STIFLING VBG
BRIDGES NNS NNP NNPS
BRIDGET NNP
737.5 CD
GHKM NNP
BOEINGS NNPS
TELEVISION-VIEWING NN
COAXING VBG
MINERO NNP
STEAKS NNS
0.0085 CD
INFORMIX NNP
MINERS NNS
26.125 CD
LANDONNE NNP
24\/32 CD
DEFAULTS NNS
FIRST-QUARTER JJ NN
MARKET-BY-MARKET JJ
CLINICAL-PRODUCTS NNS
THREE-STEP NN
ONCE-LUCRATIVE JJ
ITALY NNP
RESENTMENT NN
BATTERYMARCH NNP
NONDESCRIPT JJ
STEALS VBZ
CONGLOMERATES NNS
DLC NNP
IMPAIRMENT NN
POULIN NNP
50-50 JJ CD
CHEMICALS-INDUSTRY NN
BATEMAN NNP
SPOTS NNS VBZ
DLJ NNP
FAMILIARITY NN
FORMALIZES VBZ
MILITARILY RB
FIVE-POINT JJ
NRDC NNP
MILLION-DOLLAR-A-YEAR JJ
DISSECTING VBG
READIED VBD
KENNEDY NNP
ALMOST RB NNP
WEARINESS NN
SCHERING NNP
WAFER NN
6,320 CD
TRIPPED VBN
GARRETT NNP
SPOUT VBP
MARSEILLAISE NNP
PYONGYANG NNP
PENSION NN NNP
231-191 JJ CD
SUPERVISOR NN NNP
MAYBELLINE NNP
CURTLY RB
BLISSFUL JJ
ONE-CANCELS-THE-OTHER NNP
RE-EMPHASIZE VBP
CTBS NNP
STOCKPILE NN VB
DEDUCTIBILITY NN
CRASHING VBG
WITMAN NNP
DIE-HARDS NNS
43-YEAR-OLD JJ
LEDGER NN NNP
DNA NNP NN
CHILEAN JJ
DISSECTION NN
EXPANSION NN
SPECTER NN NNP
SIZZLING JJ VBG
MEMOIRS NNS
5.315 CD
AUDIENCE NN
HYDROGEN NN
ENID NNP
CHANDLER NNP
ADVENT NN NNP
577.3 CD
TORPEDOED VBN
NASHVILLE NNP
SUBSTANCE NN
FREQUENT JJ
E-Z JJ
PLUNGED VBD VBN
COUPES NNP
MUD-LOGGER NN
DOC NNP
LLOYDS NNP
DOE NNP
323.2 CD
VOWING VBG
DOG NN NNP
323.4 CD
THREATS NNS
DOI NNP FW
CESSNA NNP
PLUNGES VBZ NNS
ENVELOPE NN
MOUNTAINS NNS NNPS
SEQUA NNP
PARASTATALS NNS
DOM NNP
DON NNP VB
JUPITER NNP
FAULTED VBN
PITTSTON NNP
DOT NNP VBP
STORYBOARD NNP
DOW NNP
PRODUCING VBG NN JJ NNP
REAWAKENING VBG
INTRUDER NN
CONVINCING JJ VBG NN
GYMNASTIC JJ
POSSESS VB VBP
PRE-COMMUNIST JJ
DAUGHTER NN
DPC NNP
94.625 CD
EFFLUENT JJ
ICED-TEA NN
565,000 CD
LIGHTER-THAN-NORMAL JJ
INCALCULABLE JJ
LULLED VBN
EXCEPTIONS NNS
PERIGNON NNP
497.1 CD
BRIEFING NN
EXCHANGED VBD VBN
DPT NNP
IRON-HANDED JJ
TIGHT-LIPPED JJ
BECOME VB VBN VBP VBD
SUBTITLE NN
CHICAGO NNP
EXPRESSLY RB
SHORTAGES NNS
GOTSHAL NNP
SADISTIC JJ
34.375 CD
ACHIEVE VB VBP
EXCHANGES NNS
SIGNIFYING VBG
243.2 CD
TOSELAND NNP
243.4 CD
ENFORCE VB VBP
DR. NNP
CLEVERLY RB
2643.65 CD
MOBILITY NN
ASTOR NNP
FAMILIARIZE VB
STEARN NNP
STEMMED VBD VBN
TOPGRADE JJ
FIREFIGHTING NN
ACCOMMODATING VBG
CAROLE NNP
INSAM NNP
CAROLG NNP
HEYNOW NNP
SHAVED VBD VBN
LIBERAL JJ NNP NN
UNDERCUTTING VBG
DRG NNP
PLOT NN VB
WESTERLY NNP
5.355 CD
CONTINGENCY NN
PLOW VB NN
ALGERIAN NNP
PLOY NN
UNIFIED JJ VBN
ADVERT NN
SKR205 NNS
206-199 JJ
SAUDIS NNPS
SQUARING VBG
SHAVES VBZ
DRU NNP
FEELINGS NNS
LAMPHERE NNP
AUDUBON NNP
DRY JJ VB NNP
UNIFIER NN
HANG-TOUGH JJ
163.2 CD
5,900 CD
MILITARISM NN
163.3 CD
395,000 CD
ACCOMMODATION NN
WELL-PAID JJ
BLEAK JJ
ALIENATE VB
14-YEAR JJ
DSM NNP
DSP NNP
ADVEST NNP
BRANDISHING VBG
LAIRD NNP
INTERGROUP NNP
MARKET-ON-CLOSE JJ
MID-CENTURY NNP
RESEMBLANCES NNS
INEFFICIENT-MARKET NNP
MICROGENESYS NNP
STRUCTURAL JJ NNP
REASSESSMENT NN
ISABELLA NNP NN
PRICE-CUTTING NN JJ
SCHOLARSHIP NN
LOW-SULFUR JJ
DTH NNP
ISABELLE NNP
EDITORIALLY RB
PATTENDEN NNP
WELL-TRAINED JJ
SKR225 NNS
READILY RB
CASH-EQUIVALENT JJ
PETROLEUM-RELATED JJ
EXPANSIVE JJ
CONSPIRATOR NN
REPAYABLE JJ
TREMDINE NNP
30-POINT JJ
GALLOPING VBG
309.3 CD
DUE JJ RB NN NNP NNS
DUG VBD
CONCOCTIONS NNS
DUN NNP
DUO NN
COUPLE NN JJ
COLLOR NNP
ASSIGNED VBN JJ
RAIMENT NN
ONCE-VAST JJ
INSTRUCTORS NNS
EQUIVALENTS NNS
DUY NNP
REPLENISHED VBN
PERPETUATING VBG
EXPENSE NN
FUSSES VBZ
READING NN VBG
APICELLA NNP
OCCURRENCES NNS
EMBASSIES NNS
TELEFLORA NNP
EUROPEAN JJ NNP
POLITICIZED VBN JJ
DEALERS NNS NNPS NNP
INDULGING VBG
291-PAGE JJ
TRUCK-REFRIGERATION NN
STOREROOM NN
INGEST VB
COASTAMERICA NNP
AZEM NNP
CONSTANTLY RB
RIGHTS NNS NNP NNPS
WILHELM NNP
HILLSDOWN NNP
CP486 NNP CD
COLLABORATORS NNS
SUFFICIENCY NN
ONE-ISSUE JJ
CHARDONNAYS NNPS
MOBILIZE VB
EXHALED VBD
BLEED VB
CHARLESTONIANS NNS
DWG NNP
ROUGHNECK NN
ISRAELI JJ NNP
FATTENED VBN VBD
AIRTIME NN
AMALGAMATED NNP
VALHI NNP
STRUCTURED VBN JJ VBD
BOOMERS NNS
PLUG NN VB VBP
FRIEND NN NNP
STRETCHING VBG
REITERATING VBG
3090S NNS
KNOWNS NNS
MCDONALD NNP NN VB
UNREINFORCED JJ
STRUCTURES NNS NNP
PLUS CC IN NN NNP JJ RB
UNDAUNTED JJ
786,700 CD
PERSUASION NN
KINGSBRIDGE NNP
GOSSNAB NNP
BUICK NNP
VALID JJ
SCRUTINIZED VBN VBD
COUPON NN
TWO-TIME-LOSERS JJ
WORRIERS NNS
149.3 CD
5,960 CD
149.5 CD
TELEX NN
149.6 CD
149.9 CD
DENTISTRY NNP
LIQUEUR NNP
FIVE-COURSE JJ
DYK NNP
PRO-MARK JJ
ENTE NNP
LEFTISTS NNS
WORKWEEK NN
VALENTE NNP
FUTURISTIC JJ
VALENTI NNP
HARDBOUND JJ
REMAINING VBG JJ
ACCOMMODATIVE JJ
REVOLTINGLY RB
CONDEMNATION NN
ALL-BLACK JJ
ANTISOCIAL JJ
MACNEIL-LEHRER NNP
TABS NNS
NORWEGIAN JJ NNP
BUSINESS NN NNP
OCTOGENARIANS NNS
INDEPENDENT JJ NNP NN
RIGHTHANDER NN
AUTO-LOAN JJ
SPECTRA NNP
JONATHAN NNP
AMBLER NNP
TAX-COMPLIANCE NN
COMPLEXITIES NNS
WONDERFUL JJ
MISUSE NN NNP
ATTORNEY NN NNP
WEAKNESS NN
CAMBREX NNP
ADDISON NNP
TACK NN
DIVESTITURE-RELATED JJ
TACO NNP
KIMBROUGH NNP
BLACKHAWK NNP
CONVERTERS NNS
RATTLED VBN VBD JJ
463.06 CD
CARLTON NNP
STAMPS NNS
INVERSE JJ NN
RODMAN NNP
ENVY NN VBP
NON-BRAIN JJ
STRANGER NN
50%-LEVERAGED JJ
PITTED VBN VBD
FRIERS NNS
TRANSCRIBE VBP
QUAKE-DISPLACED JJ
KENNETH NNP
DURKIN NNP
CHILDHOOD NN
50-YEAR-OLD JJ
GOVERN VB VBP
96.4 CD
CORNERED JJ VBN
RETORTS VBZ NNS
SCAPEGOATING NN
INNOVATIONS NNS
BACHMANN NNP
KENNETT NNP
BREWERS NNS
EVER-GROWING JJ
MEDICINE NN NNP
RILES VBZ
DISTINCTIVENESS NN
KICKING VBG
FOCUS VB NN VBP
SHERWIN NNP
BREWERY NNP NN
KAKUMARU NNP
RILEY NNP
HAPPIER JJR
PRIMERIT NNP
INVECTIVE NN
BOULDER NNP
HERSCHEL NNP
MORTIMER NNP
FUNDAMENTAL JJ NNP
ROOKER NNP
ALTERNATES VBZ NNS
463.28 CD
PREFERS VBZ
MINUTIAE NNS
GAINING VBG NNP
RANDOL NNP
EFFECTS NNS VBZ NNPS
ARKANSAS-BASED JJ
RANDOM NNP JJ
FRYAR NNP
HARD-NOSED JJ
DIMENSION NN
WEITZEN NNP
BLACKSTONE NNP VBP
SECOND-WORST JJ
EXTINGUISH VB
CORPORATION-SOCIALIST JJ
DONNELLEY NNP
BEAUTY NN NNP
TAFT NNP
CAMBRIA NNP
MOLEHILL NN
MCGROARTY NNP
GOVETT NNP
SURGICAL JJ NNP
CONSPIRACY NN NNP
AXIOMATIC JJ
12,500,000 CD
OVERSIMPLIFIED VBN
CAMPBELL-MITHUN NNP
SHREDDED JJ VBD
TAGG NNP
VALOR NN
PERSUASIVE JJ
FLATTENING VBG
MANAGERS NNS NNP NNPS
TAGS NNS
471.60 CD
LUNGING VBG
ICED JJ
ENTRY-LEVEL JJ
HISTORICALLY RB NNP
455.29 CD
STOMPED VBD
SANITATIONISTS NNS
REWORKED VBN
TELLS VBZ
BLEND NN VB
PANAMANIANS NNPS
UNNEEDED JJ
LECHEROUS JJ
VISIONARIES NNS
SUCCESFUL JJ
ASSOCIATIONS NNS
PILGRIM NNP
RATINGS NNS
EIGHT-YEAR-OLD JJ NN
IMPORT NN VB VBP
18TH-CENTURY JJ
TAIF NNP
AFGHAN JJ NNP
ROOKIE NN
CHECKBOOK NN
TAIL NN JJ NNP
HALTINGLY RB
IMPOSE VB
CASTRO-LED JJ
LINCOLN NNP NN
REIGNITING VBG
BUILD VB VBP VBN
GIORGIO NNP
RACIALLY RB
TAIT NNP
MICHEL NNP
SIMULATORS NNS
THREE-SEVENTHS NNS
ARSENALS NNS
INTERCHANGEABLE JJ
ANTI-REJECTION JJ
HABITAT NN
ADAPTABLE JJ
102.625 CD
BUILT VBN VBD
MUFFS NNS
44,000 CD
CUTOFF NN
CALVERLEY NNP
ANESTHETIZED JJ
SUFFICED VBD
REROUTED VBN
RENDITION NN
KORN\/FERRY NNP
ERENSEL NNP
1,000-SHIP JJ
COUCH NN
HODGEPODGE NN
SERGE NNP
UNRECOGNIZABLE JJ
STATISTIC NN
EAR NN
EAT VB VBP
BLACKMAILING VBG
NUMEROUS JJ
UTOPIAN JJ
PARLORS NNS
TAKE VB VBP NN
TELOS NNP
HIGH-GROWTH NN
EBB VB NN
455.63 CD
RECANTATION NN
PATRIARCHATE NN
MEMBER NN NNP
147,300-SHARE JJ
POLICE NN NNS NNP VB
BRIGHTMAN NNP
ABBOTT NNP
QUEUING VBG
MORTIS NN
35-NATION JJ
0.0100 CD
PERTAMINA NNP
PEDESTRIANS NNS
309,381 CD
TWO-HOUR JJ
TALE NN NNP
0.0108 CD
GARNERED VBD VBN
DISPLACED VBN
NON-DAILY JJ
TALK NN VB VBP NNP
TALL JJ
CLASSLESS JJ
ABBOUD NNP
FLUENT JJ NNP
CLEAN-FUELS NNS
POLICY NN NNP
ECI NNP
REPLICATING VBG
TAXED VBN VBD
HAPPILY RB
VENETIAN JJ
UNOBSERVED JJ
VALUE NN NNP VBP VB
MILLEN NNP
THAMES NNP
ECLAIRS NNS
CULTURE NN NNP
GUNSLINGING VBG
TAXES NNS VBZ
MILLER NNP
0.0115 CD
TAME JJ
EDA NNP
ENHANCING VBG
SUBINDUSTRY NN
INDUCEMENT NN
COLLABORATED VBD
INDUSTRIALIST NN
MOREOVER RB JJR
VESSEL NN
COATINGS NNS NNP
CHIEN-MIN NNP
BLESS VB
MICHIO NNP
REPLICATION NN
LIBERTY NNP NN
EDS NNP
EDT NNP
VALVE NN
SURREAL JJ
PRIVATE-BANKING JJ
TANA NNP
752.9 CD
SUSPECT VBP VB JJ NN
MARSHAL NN
LONGWOOD NNP
PARLEY NN
TANK NN VB NNP
GRASSO NNP
CORRECTING VBG
ENLIGHTENMENT NN
MACINNIS NNP
LIGHTHEADED JJ
TANS NNS
IMMERSED VBN
EEL NN
COUGH NN VB
ORACLE NNP
CLAPTRAP NN
GRASSY JJ
447.76 CD
PARTICULARLY RB
GENERAL-ELECTION NN JJ
CONGER NNP
SAITAMA NNP
HEADLINE-GRABBING JJ
F.A. NNP
DEMOBILIZE VB
19,000 CD
REOFFERING NN
FIFTY-TWO JJ
GIFT NN
FUNDED VBN JJ VBD
MADLY RB
TAOS NNP
NINE-STORY JJ
CORRECTION NN
PROHIBITIONS NNS
SCHWINN NNP
BLEUS NNP
PENTAGON NNP
MAGAZINES NNS
JOHNSON NNP
CLIPPED VBD VBN
BOUTIQUES NNS
ADVENTURES NNS
27-MARCH NNP
BIG-STOCK JJ
T-BOND JJ
SKIPPING VBG
FRANKENSTEIN NNP
TAPE NN VB VBP
POLYGRAM NNP
EGA NNP
ONE-OUT-OF-THREE JJ
340.36 CD
DIRECT-SELLER NN
SALAAM FW
VEERING VBG
CHIPELLO NNP
BENEVOLENT JJ
EGG NN NNP
50.01 CD
TAPS VBZ NNS
EGO NN
PHOTOGRAPH NN NNP
MILLIE NNP
BOGGING VBG
SMATTERING NN
REGARDED VBN VBD JJ
CHEESES NNS
MANUSCRIPT NN
BRAEUER NNP
TUTORED VBN
MEMORY-CHIP NN
MILLIS NNP
NORBERTO NNP
PACITTI NNP
CAMERINO NNP
DRUMROLL NN
80-SECOND JJ
1.5753 CD
BANKROLL VB VBP
HUMILITY NN NNP
189.32 CD
1.5755 CD
RECORD-TYING JJ
JOHNSTONE NNP
EMOTE VB
WILLINGLY RB
MCCARTHY NNP
WHOLESALING VBG
MORTON NNP
DELINQUENCY NN
DASSAULT NNP NN
TOSSING VBG
DOORS NNS
WORK-RULE JJ NN
ICON NN
EMBEDDED VBN
SLANTED JJ
INVEST\/NET NNP
SWEATED VBN
27,225 CD
MCCARTIN NNP
ELDERLY JJ
332.38 CD
MARSHES NNS
COSMETOLOGY NN
ACCOUNTED VBD VBN
1.5765 CD
APPLEBAUM NNP
ATTRIBUTED VBD VBN
S&LS NNS NNP
671,000 CD
VOLLEY NN
TART JJ
SWEATER NN
DISTURB VB
HYALURONIC JJ
SOFTENS VBZ
NUMERICALLY RB
COSGROVE-MEURER NNP
ATTRIBUTES VBZ NNS
APIECE RB JJ
F.E. NNP
TRANSCRIPT NN
TASK NN NNP
COULD MD
189.52 CD
1.5775 CD
TASS NNP
50.38 CD
LUNGED VBD
PROFIT-TAKING NN NNS
CONDOMINIUM NN NNP
INTERSTATE NNP JJ NN
INDUSTRIALIZE VB
BOGGED VBD
0.0182 CD
TATA NNP
SEATING NN VBG
UNDERSOLD NN
MEGA-CRASHES NNS
BEFORE-AND-AFTER JJ
ESPANOL NNP
EKE VB
6,400 CD
NORGE NNP
42.25 CD
816,000 CD
ONLOOKERS NNS
CHARITIES NNS NNPS
50.45 CD
50.46 CD
UNSTABLE JJ
CARPET NN
ARBITRAGE-RELATED JJ
NEW-HOME JJ
AUTO-EMISSIONS NNS
SPENSER NNP
FLOWED VBD
MGM\/UA NNP NN
GILL NNP
SUPERCHARGER NN
FORGING VBG
FLOWER NN NNP
TREAD VB
GILT NN|JJ NN JJ
340.83 CD
SUB-MINIMUM JJ
REDISCOVER VB
ELF NNP
SNIPING NN
50.50 CD
1.5795 CD
ELI NNP
IMPOSTOR NN
TONIGHT NN RB NNP
TAUT JJ
SEDANS NNS
ELM NNP
TREAT VB VBP NN
ELP NNP
50.59 CD
PUSHKIN NNP
MACDONALD NNP
ENOUGH RB JJ NN NNP
WAGED VBD
COUNT NN VB VBP
19-MONTH-OLD JJ
F.H. NNP
ELY NNP
GOVERNMENT-INSURED JJ
POPULARIZED VBD VBN
SHOW-PIECE JJ
INVESTMENT-BANKING NN JJ
FACADE NN
RETHINK VB NN
ROBERTSCORP NNP
EMC NNP
DIVIDE VBP VB NN
CORRECTIVE JJ
WAGES NNS
ELECTROCHEMICALS NNS
GROUCHO NNP
404.1 CD
DOCTRINE NN NNP
26.02 CD
45,000-$60,000 CD
CUBA NNP
34.25 CD
INSECURE JJ
CUBE NN NNP
HAZELL NNP
WATCHERS NNS NNPS
JEWELERS NNPS NNP NNS
PROMPT VB JJ
CRIMINALS NNS
BITTERNESS NN
STOCK-FOR-DEBT JJ
EMS NNP
JEWELERY NN NNP
SKIMMERS NNS
MILLON NN
GINN NNP
BUY-SELL JJ
CUBS NNP NNS
HAMMETT NNP
DECISION-MAKING NN JJ
CABAL NN
WESTINGHOUSE-MITSUBISHI NNP
STANDBY JJ NN
EARTHQUAKE-RESISTANT JJ
END NN VB VBP NNP JJ
STEAK NN
STEAL VB VBP
STEAM NN
ENG NNP
COUPE NN
ENI NNP
34.35 CD
STANCE NN
STANCH VB
RESEMBLANCE NN
WARDWELL NNP
TONGUE-IN-CHEEK JJ RB
CARPING NN
CHAUSSON NNP
ALUMNUS NN
BATIBOT NNP
CARLUCCI NNP
KURDS NNPS
COUPS NNS
BACHMAN NNP
UNLABELED JJ
F.J. NNP
UNLEASHING VBG
22-YEAR-OLD JJ
308.32 CD
210,000 CD
PARLOR NN
HIGH-GRADE JJ NNP
EXERCISING VBG
DERELICTION NN
GRAVELLE NNP
324.75 CD
PARTICLE NN
HIJET NNP
SAUSALITO NNP
FACILITY NN NNP
BEAVER NNP
TAXI NN
F.C NNP
BOMBSHELL NN
HAMMER VB NN
42.60 CD
26.23 CD
TEODULO NNP
ASCENT NN
EICHNER NNP
ANGLO-AMERICAN NNP
ONE-FIFTH JJ NN
HOT-LINE NN
324.9 CD
26.29 CD
SUSPEND VB
WOOD-PRODUCT NN
UNLISTED JJ
BLESSINGS NNS
EMPLOYERPAID JJ
DISTINCTIVELY RB
ABSTAINED VBD
STANDS VBZ NNS NN
CINEMATIC JJ
UBBERROTH NNP
SMALL-BUSINESS NN
EPA NNP
HEALING NN VBG
MACDOWELL NNP
18.11 CD
GRAPHIC JJ NNP
5.435 CD
LOUDEST JJS
42.75 CD
PRETRIAL JJ
TREES NNS NNP
EPO NNP
STINGIER JJR
SERVE VB VBP
EPP NNP
YEAR-ROUND JJ
UNDERCAPITALIZED JJ
HOPELESSLY RB
VOLUNTARILY RB
STIFFENING JJ
COURT NN NNP VB
AMENDED VBN VBD
CUES NNS
BOOKLET NN
LANGTON NNP
CONSTITUTION NNP NN
SUPERFICIAL JJ
JOAQUIN NNP
TRANSFERABLE JJ
EUROCOM NNP
244.2 CD
UNDERTAKING VBG NN
NORMA NNP
244.6 CD
244.8 CD
26.48 CD
PANJANDRUMS NNS
CUFF VB
STEDT NNP
BEECHAM NNP
FARM-MACHINE NN
JOHNSTOWN NNP
OMRON NNP
POST-1987 JJ
GIRL NN NNP
NORMS NNS
PUG-NOSED JJ
VITIATE VB
SEDATE JJ
HAND-PICKED JJ
ERA NN NNP
RUMINATIONS NNS
SUCHOCKI NNP
DELUGED VBD VBN
INTAN NNP
ERC NNP
26.50 CD
18.32 CD
WISCONSIN NNP
STEEL NN NNP
PHOSPHATES NNP
26.54 CD
18.35 CD
STEEP JJ NN NNP
STEER VB
FULBRIGHT NNP
SHEETROCK NN
ERR VB VBP
STRIPPED VBN VBD JJ
POST-1997 JJ
NADELMANN NNP
POLISH JJ NNP VB NN
5.2830 CD
CHOCOLATE NN JJ
GIST NN
50.875 CD
GRIMACE VB
ESB NNP
6,480 CD
ENTREKIN NNP
18.46 CD
HIGHWAYS NNS
ESL NNP
26.68 CD
18.49 CD
STOCKYARDS NNS
INITIALING VBG
ESP NNP
UNDERLINED VBD
RESONANT JJ
BELLY-UP RB
ESTHER NNP
CO-MANAGED VBN
EST NNP NN RB
POLITE JJ
NUCLEAR-POWERED JJ
WILLINGNESS NN
SHOEHORNED VBN
FARMERS NNS NNP NNPS
PRIZE-WINNING JJ
FORGIVE VB
MOVIES NNS
BATTED VBD VBN
EONS NNS
PLACEBO NN
SALANG NNP
CRANKED VBD VBN
KINGSVILLE NNP
CINEPLEX NNP
DRAFTED VBN VBD
CO-MANAGER NN
ETA NNP
GRANULAR JJ
ETC FW NN
18.50 CD
BATTEN NNP
OIL-SERVICE NN
BATTER NN VB
SALANT NNP
SELF-REINSURE VB
AUTHORIZATIONS NNS
6,495 CD
QUAKE-RELATED JJ
STRIKES NNS VBZ
SPINAL JJ NN
INFURIATE VB
6,499 CD
TOBACCO-INDUSTRY NN
WELL-CAPITALIZED JJ
PLIERS NNS
EXCURSIONS NNS
APPROVING VBG
PRINTED VBN JJ VBD NNP
KAMINSKI NNP
DOCK-SIDERS NNS
STUPID JJ
HIGHEST-PITCHED JJ
26.81 CD
ACCORDS NNS NNPS NNP
MOXIE NN
18.65 CD
WREAKED VBD
PRINTER NN
18.68 CD
18.69 CD
90-MINUTE JJ
GIVE VB VBP
FEMINA NNP
EMBEZZLING VBG
DECLINED VBD VBN
INTERCOLLEGIATE JJ
OBLIGATIONS NNS
INTEL NNP
PAPERCLIP NN
TIANT NNP
EVE NN NNP
SULFUR NN
18.73 CD
INTER NNP
CYCLES NNS
STEIN NNP
18.75 CD
ROOMMATE NN
SELF-REGULATORY JJ
INVISIBLE JJ
DIVERGE VB
BARINGS NNPS
DECLINES NNS VBZ
CIRCUITOUS JJ
90-FOOT JJ
FOOD-SHOP JJ
FAIR-MARKET JJ
PLAYLAND NN
SUPER-CHARGER NN
HUDNUT NNP
FEDERS NNP
ELEVATIONS NNS
WAGON NN NNP
DIVINE NNP
JUNKBOND-FINANCED JJ
MODIFIED VBN JJ
DIVING JJ NN VBG
VOLUNTARISM NN
2-23 CD
JUNKYARD NN
BEVMARK NNP
TRUTH-IN-LENDING NN
INEFFICIENCY NN
SENSITIVES NNS
NORSK NNP
UPPER-DECK JJ
MODIFIES VBZ
DRUNKENNESS NN
PUPPETS NNS
SIGNIFIED VBD
FRAGMENT NN
STAUNCH JJ VB
POLICEMAN NN
CULT NN NNP
BLACK-MAJORITY JJ
25.875 CD
148,000 CD
MONEY-SAVING NN
HYSTERICALLY RB
SIGHS NNS VBZ
SIGHT NN
PRESTIGE NN JJ NNP
MAGNETISM NN
18.95 CD
FUNDRAISERS NNS
BINDERS NNS
REINVIGORATING VBG
MIG-29S NNS
18.98 CD
LAUTENBERG NNP
NORTH NNP JJ RB NN NNPS
SALARY NN
ASSIGNMENTS NNS
EDUARD NNP
BARRELING VBG
LAKEWOOD NNP
RENTING VBG
GOULDOID JJ
CABLE NN NNP
WOOD-PRODUCTS NNS
APPROPRIATIONS NNS NNP NNPS
EXCLUSIVELY RB
TREND NN VB NNP
TRACKED VBN VBD JJ
STEVRIC NNP
RESONATE VB
BUY-BACKS NNS
STINGING JJ VBG
EYE NN NNP
HENDRIK NNP
REFERS VBZ
DELINQUENTS NNS
TRENT NNP
KAPPA NNP
EYP NNP
REINVIGORATION NN
MOMENT NN
CONFORMING VBG
DEBATABLE JJ
OVERGENERALIZATION NN
SELF-TENDER JJ
2,853,000 CD
LEOTARDS NNS
COLUMNIST NN
BUSINESSES NNS
AFFECTING VBG
MASONRY NN
PROMPTED VBD VBN
STEMS VBZ
CAPTIVE JJ NN
RENEWAL NN
STOOKEY NNP
UNSPECIFIED JJ
DRINKER NN
SEMICONDUCTORS NNS NNP
LYLE NNP
PEUGEOT NNP
PENANG NNP
STENA NNP
BATTLE NN NNP VBP VB
ARONSON NNP
3-A-PERSON JJ
HEALTHSOURCE NNP
FRERES NNP
MORE-ESTABLISHED JJR
CRUELTY NNP
ALLAN NNP
CONSISTENT JJ
\*\* SYM
MAXXAM NNP
INEQUALITIES NNS
97-1 CD
WWOR NNP
JEWBOY NN
EVALUATING VBG
DENVER-BASED JJ
RUEFUL JJ
ALLAY VB
F.W. NNP
CUPS NNS
FEDERICO NNP
SCRAPPY JJ
SIGNATURES NNS
QUESTIONNAIRE NN
ECHOED VBN VBD
DEACON NNP
HARDER-LINE JJ
FLUFFY JJ
ARISING VBG
POISONOUS JJ
OSAKA NNP
MULTIPLED VBD
MOVING VBG JJ NN
97.2 CD
SIGMA NNP
LAWYERING NN
MANAGEMENT-UNION NN
GRANNON NNP
CAVEAT NN
REPRISALS NNS
97.8 CD
ECHOES NNS
SKASE NNP
97.9 CD
EVALUATION NN
DEFENSIVE JJ NN
WEISFIELD NNP
SENATOR NNP NN
MULTIPLES NNS NNPS
LYNN NNP
COMMERCIALE NNP
124-YEAR-OLD JJ
BENEFICIAL JJ NNP
REVERSAL NN
REFRAIN VB NN
DIRECTOR-GENERAL NN
CUSTOMARY JJ
INVESTS VBZ
CURB VB NN
FOUR-STOCK JJ
383-30 CD
CURE VB NN
STEPS NNS VBZ
COMMERCIALS NNS
WRENCHED VBN
KURSK NNP
CONSULTED VBN
CURL VB
SPRAWLING VBG JJ
PITTANCE NN
MANIFESTOS NNS
BRINKSMANSHIP NN
BUFFER NN VB
EVERYTIME RB
PASSIONATELY RB
BUFFET NN VB
DOCUMENTING VBG
CURT NNP
LYON NNP
SIGNS NNS VBZ
OFFSHOOT NN
ORGANIZATIONS NNS NNP NNPS
PARTICIPATIONS NNS
RENEWED VBN JJ VBD
KURTH NNP
GOBBLED VBN
DIVORCED VBN VBD
AUTOMOBILE NN NNP
ZIYANG NNP
SPREADS NNS VBZ
MAEDA NNP
COMMITMENT NN
112,383 CD
OBSTRUCTED VBN
FRACTURED VBD JJ VBN
KURTZ NNP
OSAMU NNP
TRUSTHOUSE NNP
FORESIGHT NN
STERN NNP JJ
297,446 CD
ALLEN NNP
OMNICARE NNP
CUTE JJ
IDEA NN
MERGERS NNS NNP NNPS
ALLEY NNP NN
PITTSBURGH-BASED JJ
BACCALAUREATE NN
CUTS NNS VBZ
IRRESPONSIBLE JJ
ENABLE VB VBP
THOUGHT-OUT JJ
PONDER VB VBP
VENDOR NN
MANAGEMENTS NNS
DESPISED VBN
IRRESPONSIBLY RB
FLOWING VBG JJ
OFFSHORE JJ RB NNP
COVAS NNP
STANDUP JJ
REVERSED VBD VBN JJ
1,003,884 CD
BEATLES NNP
DICTATORSHIPS NNS
WATER-TREATMENT NN JJ
ABSOLUTELY RB
AUSTRALIA NNP
BUSTLING JJ
PEPPERING VBG
CYCLISTS NNS
REVERSES VBZ
OMINOUSLY RB
SYMPATHIZERS NNS
LOOPHOLES NNS
OAKLAND-BERKELEY NNP
MINIMILL NN
STEADFAST JJ
A\/S NNP
ADJUSTMENT NN NNP
EXECUTORS NNS
FIREMAN NNP NN
HALF-COMPLETED JJ
REMORA NNS
PROMPTLY RB
FAA NNP
FAB NNP
ANTONI NNP
FAD NN
RAHWAY NNP
KOHLBERG NNP
PRECISELY RB
PAPER-AND-CRAYON JJ
DIVERSE JJ
CONVOLUTIONS NNS
INSTINCTIVELY RB
FAN NN VB
SUSPENSE NN
FAR RB NNP JJ IN
ANTONY NNP
OZARKS NNPS
FAT JJ NN NNP
REVSON NNP
FAX NN NNP
ELVEKROG NNP
FAY NNP
GREENSPAN NNP
SUBORDINATED JJ VBN VBD
REPORTERS NNS
500-STOCK JJ NNP CD
STEVE NNP
AD-AGENCY NN
MICRONITE NN
IMPETUOUS JJ
FEDERAL-LOCAL JJ
NERVOUSNESS NN
LAWFUL JJ
CARTILAGE NN
CLEVELAND NNP NN
1993-2009 CD
HARGRAVE NNP
1,430,000 CD
FBI NNP
FOOD-PROCESSING NN JJ
SUBORDINATES NNS VBZ
NOW-OBSCURE JJ
NOODLES NNS
SIGOLOFF NNP
FIREARMS NNPS
SELF-DISCIPLINE NN
IMPENDING JJ VBG
EXCITING JJ
TEMPE NNP
DISHEVELED JJ
VERMONT-SLAUSON NNP
FERVENTLY RB
TAKUSHOKU NNP
FIVE-CENT JJ
SEQUELS NNS
DELAYS NNS VBZ
833.6 CD
TEMPO NN
TEMPS NNS
TEMPT VB VBP
SUSPENSIONS NNS
CREATOR'S NN
REMOTE JJ
FCC NNP
COST-SAVING JJ
1.5805 CD
CHEETAH NN
ULTRA-RIGHT JJ
WHITEHEAD NNP
ROOFING NN
GLOBALISTS NNS
ENVISIONED VBN
TRESPASS NN VBP
GRIGSBY NNP
NICARAGUAN JJ NNP
RESIDENT NN JJ
CYNICISM NN
COVER VB NN VBP NNP
KEEFE NNP
MEGA-ISSUES NNS
ILLOGIC NN
COVEY NNP
SHELBY NNP
PATHLOGY NN
SESIT NNP
VESTED JJ VBN
FDA NNP
HEIGHTS NNP NNS NNPS
FOURTH-RANKING JJ
PROFILE NN VB JJ
STANZA NNP
PRONGS NNS
SEVERANCE NN JJ
MINGLE VBP
INFLAME VB
EXAGGERATED JJ VBN
RECTIFICATION NN
69-26 CD
FIREMEN NNS
CRISSCROSSING VBG
ANTORI NNP
REMOVE VB
1.5820 CD
FED NNP VBN NN VBD JJ
FEE NN
PRE-KINDERGARTEN NN
1.5825 CD
RESERVE-BUILDING NN
ENDORSEMENTS NNS
DIFFERENT JJ NNP
BUMPED VBD VBN
IDLE JJ VB
BUDDIES NNS
GAS-GATHERING JJ VBG
FEW JJ
MOTORS NNPS NNP NNS
EXCISED VBD VBN
O'LINN NNP
FINANCIAL-PLANNING JJ
POUNCE VB
SURMOUNTING VBG
BUMPER NN
KEEHN NNP
RHIN NNP
ELANCO NNP
IRIAN NNP
CONTROLS NNS VBZ NNP
TRANSMISSION-PRODUCT NN
COMFORTING JJ VBG
STRONGMAN NN
FITNESS NN NNP
150-MEGAWATT JJ
SHOOTINGS NNS
POPULATIONS NNS
FFR SYM
MULTIMILLION JJ NN
VIKTOR NNP
SEAGRAM NNP
673.3 CD
STRASZHEIM NNP
KNIFE NN NNP
NEIMAN-MARCUS NNP
LAKES NNP NNPS NNS
1.5840 CD
COVIA NNP
87.026 CD
POUNDS NNS
INTENSIFY VB
3RD-BIGGEST JJ
PROGENITORS NNS
NULLIFY VB VBP
ALLEGIANCE NN
BADGES NNS
GUIDELINES NNS
MARINE-RELATED JJ
1701.7 CD
FHA NNP
ENTICING VBG
80-PAGE JJ
PENTHOUSE NN
IDEALISTIC JJ
FAIR-USE JJ
FRONT-DESK NN
ALLOW VB VBP
ALLOY NN
CHOOSE VB VBP
CONDEMNING VBG
UPCHURCH NNP
SHICOFF NNP
TRADE-DISTORTING JJ
593.5 CD
JURORS NNS NNP
FINNEY NNP
EMPTY JJ VBP VB
CONVERTIBLES NNS
UNCEREMONIOUSLY RB
CAMARO NNP
CONTROLLED VBN VBD JJ
FIG NNP
ROLLING VBG JJ NNP NN
CONFIGURATION NN
ASSASSINATING VBG
PORNO-INSPIRED JJ
RASPBERRY NN
GRUNTAL NNP
FIO NNP
WAITERS NNS
FIT VB NN VBP JJ VBN
ROLLINS NNP
CONTROLLER NN
FIX VB NN
NOSES NNS
THANKS NNS
HAZELNUT NN
ENLISTING VBG
18.125 CD
MEDICAL-PRODUCTS NNS
APPEARANCE NN
TURANDOT NNP
STOCKBUILDING VBG
POSTAL NNP JJ
STOCK-EXCHANGE NN
TIBBS NNP
16\/32 CD
BLOOD-RED NN
PROPERTY-LOAN JJ
DEBACLE NN
ASSASSINATION NN
FORTHRIGHT JJ
223-178 JJ
DISQUIETING JJ
HEAVY-HANDED JJ
BEARABLE JJ
UNDERWROTE VBD
EXCESSIVE JJ
TIE-BREAKING JJ
2423.9 CD
UNIFORMS NNS
6,500 CD
YEAR-ON-YEAR JJ
1.5885 CD
USURPATION NN
INTRADAY NN JJ
CRUMPLED JJ VBD VBN
NT&SA NNP
AMOUNTED VBD VBN
RETREATED VBD VBN
COMPANY-SPONSORED JJ
24TH-LARGEST JJ
INFLATE VB
EXPECTATION NN
BOUQUET NNP
KEENE NNP
COMPUTER-SERVICE JJ
FLA NNP
SPORADIC JJ
1.5890 CD
ALERTING VBG
HOLLIGER NNP
SUPER-SPY NN
AMONGST IN
FINNIE NNP
CONSCIENCE NN
CONTRACTUAL JJ
OOMPH NN
FLU NN
PROFITS NNS VBZ NNPS
BOOKMAN NNP
DYNAMO NN
BARD\/EMS NNP
FLY VB VBP NN
SPOKANE NNP
TIP-OFF NN
FMC NNP
LATTER-DAY JJ
LIQUEFIED VBN
TIBET NNP
NON-EQUITY JJ
405.4 CD
FMI NNP
BRAHMS NNP
COUNTERING VBG
BRIMMED VBD
BALL-BEARING NN
SHEREMETYEVO NNP
INDECON NNP
405.9 CD
PRICIEST JJS
ZOMBIE NN NNP
G-2 NN
CHEROKEE NNP
LIQUEFIES VBZ
SHELLS NNS
G-7 NNP NN CD
TBWA NNP
POSTED VBD VBN JJ
EXEMPTING VBG
SHELLY NNP
SCREENS NNS VBZ
POSTEL NNP
CACAO NNP
KEEPS VBZ
COLODNY NNP
STAY-AT-HOME JJ
NEUHAUS NNP
CATALOG NN
POSTER NN
BUDDING VBG JJ
RECEIPTS NNS NNPS NNP
EPIC NN
HENRIK NNP
MINIMIZE VB
DEVELOPS VBZ
HIKED VBN
BELTING VBG
FILTER NN NNP
TWO-FAMILY JJ
ISHIGURO NNP
AIDS-INFECTED JJ
UNHOCKED VBN
RUNKEL NNP
GRAPHICS NNS NNP NNPS
LAGGARD JJ NN
40-A-SHARE JJ
HIKER NN
HIKES NNS
ACHIEVEMENT-TEST NN
EXEMPTION NN
FOE NN
FOG NN VB
557,000 CD
UNINITIATED JJ
INEQUITIES NNS
VALUE-ORIENTED JJ
FOR IN RP RB
MAJORITY-PARTY JJ
IRONCLAD JJ
FOX NNP NN
FOY NNP
GREENSPON NNP
HARD-BITTEN JJ
U.S.A. NNP NN
BICYCLING NN NNP
PAUSING VBG
LANCET NNP
IMPEDED VBN
CONSIGNED VBN
ACCOMPANY VB
TROTTING VBG
PAGONG NNP
WATCHFUL JJ
ON-SITE JJ NNP
DOWNGRADED VBD VBN
INCOME-ORIENTED JJ
DISTORTIONS NNS
FPL NNP
REFERRING VBG
IMPEDES VBZ
499.4 CD
TESTIMONIAL NN JJ
HIGHLY-CONFIDENT JJ
NEUROLOGISTS NNS
DOWNGRADES NNS
500-STORE JJ
HECTIC JJ
OUTPLACEMENT NN NNP
PACIFIED VBD
REGISTERS NNS
INTERNATIONAL NNP JJ
245.3 CD
VERITABLE JJ
CHANGYONG NNP
INTERIORS NNS
FEODOR NNP
HOUSEMAN NN
SPORKIN NNP
FAIRFIELD NNP
PLUCKED VBN
EMOTIONAL JJ
CO-OWNER NN
SAVERS\/INVESTORS NNS
OUT-OF-TOWN JJ
DALLIANCES NNS
FINGERING NN VBG
COMPLETE JJ VB
SCHANTZ NNP
THREE-WEEK-OLD JJ
CONTINGENCY-FEE JJ
FINDING VBG NN NNP
CADMIUM NN
FRI NNP
A\/K\/A IN
FRIGHT NN
JENNISON NNP
SEIREN NNP
FRO RB
CHILDISH JJ
SCRIBBLED VBD
VANCE NNP
PRIVATE-PROPERTY NN
LUMPS VBZ NNS
FRY NN
IRINA NNP
KNOWLEDGEABLE JJ
GUTFREUND NNP
FINANCIERE NNP
SIGNORE NNP
CONSTRAINED VBN
BROMWICH NNP
165.1 CD
TAINTED-MEAT NN
WINDSHIELDS NNS
BUNDLED VBN
TINIEST JJS
DISCIPLES NNS
AMORTIZATION NN
FINANCIERS NNS
CLAIM NN VBP VB
FT. NN
LANCIA NNP
DUNLAEVY NNP
EDMAR NNP
BUNDLES NNS
MOST-LIVABLE JJS
REFCORP NNP NN
FSX NNP
ARBORETUM NNP
COST-REDUCTION JJ
SMUGGLE VB
GRIEVOUS JJ
26,956 CD
BERSHAD NNP
FTC NNP
KNUCKLES NNS
PARTS-ENGINEERING JJ
UNESCO NNP
REPEATEDLY RB
CACHE NN
CUTOUTS NNS
EUGENE NNP
ENCUMBERED VBN
BREAKER NN
OUTLINE VB NN
2.00 CD
PULLBACKS NNS
2.01 CD
2.02 CD
BREAKEY NNP
2.03 CD
2.04 CD
2.05 CD
BICYCLIST NN
2.06 CD
INTENSITY NN
2.07 CD
UNCONSTITUTIONALLY RB
2.08 CD
FUN NN
SERVED VBD VBN
2.09 CD
PLEDGING VBG
BIANNUAL JJ
UNDERWEAR NN
FUR NN NNP
ELABORATE VB JJ
CLENDENIN NNP
108-POINT JJ
CIMINERO NNP
SERVER NN
SERVES VBZ
ATMOSPHERE NN
EPPS NNP
CONSEQUENCE NN
MFUME NNP
ANKLES NNS
EXPERIENCING VBG
2.10 CD
RUPERT NNP
2.11 CD
2.12 CD
2.14 CD
2.15 CD
CONNAUGHT NNP NN
2.16 CD
STALKED VBN
2.17 CD
2.18 CD
GLASS-CONTAINER JJ
2.19 CD
MONEY-MAKING JJ
MENTIONS VBZ
PURSE-SNATCHINGS NNS
FORMULATE VB
RACHEL NNP
GRUBB NNP
INTENSIVE JJ
THREE-YEAR JJ
ANAHEIM-SANTA NNP
PLIGHTS NNS
FORCEFULLY RB
VELLANTE NNP
REVOLVING JJ VBG
ENCOURAGED VBN VBD JJ
BARKING VBG
1\/4-INCH JJ
DECISIONS NNS
2.20 CD
QUICKSAND NN
2.21 CD
SAINTLY JJ
2.22 CD
AQUARIUM NN
HECTOR NNP
2.23 CD
2.25 CD
2.26 CD
2.27 CD
2.28 CD
ITZHAK NNP
2.29 CD
ENCOURAGES VBZ
CLAMP VB NN
IMPROPER JJ
STINSON NNP
SECRECY NN NNP
DIAMONDS NNS
BARBERA NNP
OPEN-TOP JJ
TOTING VBG
PREPAYMENTS NNS
HUBBARD NNP
ARCHULETA NNP
TENDS VBZ
EPIPHANY NN
IRISH JJ NNP
BONDING NN
BARBERS NNS
2.30 CD
LIFESTYLES NNP
2.32 CD
GRAUER NNP
2.33 CD
2.34 CD
2.35 CD
2.36 CD
NONDURABLE JJ
APPARITIONS NNS
STROMEYER NNP
SUPER-MAJORITY JJ NN
2.38 CD
UNLIT NN
2.39 CD
CONSUMER-PRODUCTS NNS JJ
FLETCHER NNP
HOECHST NNP
FAVORITES NNS
UNSCHEDULED JJ
KNOCKING VBG
FRESCA NNP
INCOME-TAX NN JJ
ASLACTON NNP
PILINGS NNS
TORNADO NN
MUSTACHE NN
MAJORITARIAN JJ
THREE-PAGE JJ
FRESCO NN
2.40 CD
DISMANTLED VBN
2.41 CD
TYPED VBN
SEGMENTS NNS
2.42 CD
DETRACT VB
2.43 CD
ANGEL NNP
2.44 CD
2.45 CD
2.46 CD
2.47 CD
2.48 CD
ANGER NN
2.49 CD
AIRLINE-LANDING JJ
CLAUSES NNS
DEADLY JJ
TYPES NNS
MARGARINE NN
ALDRICH NNP
BIZMART NNP
WHEC-TV NNP
ZIGZAGS NNS
UNIMPORTANT JJ
REFUELING VBG
CLEVER JJ
EVER-FASTER JJ
2.50 CD
2.51 CD
2.52 CD
2.53 CD
INUIT NNP
2.54 CD
2.55 CD
HOUSE-PAINTING JJ
2.56 CD
2.57 CD
HEWED VBD
2.58 CD
2.59 CD
SPRAY NN
CANTONAL JJ
CLAPP NNP
SEIFERT NNP
CELLAR NN NNP
WRONGED VBN
STOCK-SELECTION JJ
GRUFF JJ
CUSTOM-DIE NN
GARDENERS NNS
SEASONALLY RB
RESOUNDING JJ
DISASTER NN
RIUNITE NNP
117-ACRE JJ
ACIDS NNS
2.60 CD
2.61 CD
LEMMON NNP
2.62 CD
2.63 CD
2.65 CD
RUSTING JJ
2.66 CD
2.68 CD
2.69 CD
GETTYSBURG NNP
DRUGSTORES NNS
INTRINSIC JJ
LINGERS VBZ
DONATING VBG
PRAGMATISM NN
SIEGAL NNP
JACOBOSKI NNP
NTSB NNP
PRAGMATIST NN
309,500 CD
WRESTED VBN
RATTNER NNP
PLAYBOY NNP
DEMOTED VBN
LICENSE NN VB VBP
WATANABE NNP
CLARA NNP
UNDETERMINED JJ
TIME-TABLE NN
BOOKCASE NN
2.70 CD
MOVIELINE NNP
2.71 CD
2.73 CD
2.74 CD
2.75 CD
CLARK NNP
2.76 CD
CO-OPERATIVE NNP
2.77 CD
2.78 CD
2.79 CD
COURSE NN NNP
98.3 CD
98.5 CD
98.6 CD
ATTENTION NN VB
98.8 CD
EXHORT VB
DONATION NN
QUOTA-TRAINED JJ
HEARTFELT JJ
REALIZATION NN
CONSIDERATIONS NNS
SUPERMARKETS NNS NNP
HALF-LIFE NN
2.80 CD
2.81 CD
2.82 CD
CLASH NN VB
2.83 CD
10-DAY JJ
2.85 CD
CONTRIBUTORS NNS
2.86 CD
EMIGRATION NN
2.87 CD
2.88 CD
2.89 CD
375.16 CD
CLASS NN NNP
MEGA-LAWYER NN
ONTARIO NNP
SPREE NN
ULRIC NNP
COURTS NNS VBZ NNPS
ADMINISTRATOR NN NNP
MASS-MURDERER NN
2.90 CD
2.91 CD
WXRK NNP
PRELIMINARY JJ
2.94 CD
2.95 CD
BEESWAX NN
2.97 CD
ONE-WOMAN JJ
CRITICS NNS
SCIENTIFICALLY RB
LILTING JJ
FIVE-SESSION JJ
RIAA NNP
SURPLUS NN JJ
RIAD NNP
CHASEMAN NNP
RINGS NNS VBZ
TRANSMITTING VBG
UNNECESSARILY RB
SLIVER-LIKE JJ
MECHANICALLY RB
REFINANCE VB
VENTILATION NN
MESSINGER NNP
STOUFFER NNP
UNCOLLABORATED JJ
VENEZUELA NNP
367.10 CD
GRAPHITE NN
SEVILLE NNP
707-PENCE JJ
CLAUS NNP
WELL-FINANCED JJ
SIEGEL NNP
PAPERWORK NN NNP
IMPASSIONED JJ
DISPERSANT NN
NEW-GENERATION NN
ANGLE NN
UNSPEAKABLE JJ
Y-MP\/832 NNP
RIBS NNS
YANKEES NNPS
FOLLOWING VBG JJ NN
375.40 CD
ANGLO NNP
MASIUS NNP
STATUTORILY RB
ANNALEE NNP
ELECTED VBN VBD JJ
COWAN NNP
APART RB RP
BLITHELY RB
HIERARCHY NN
RICA NNP
REVERTED VBN
PURSES NNS
BOOKLETS NNS
TENN. NNP
RICE NN NNP
36,000 CD
BISHOP NN NNP
PARLANCE NN
RICH JJ NNP
FISCAL-FIRST JJ
CRANSTON-MITCHELL NNP
SOLID-STATE JJ
RICK NNP
INSTABILITY NN
ONE-SHOT JJ
RICO NNP
A-MEN NNS
VALRICO NNP
367.30 CD
BAILY NNP
49-MEMBER JJ
HARNESS NN
TRUSTS NNS VBZ
HOLDOVERS NNS
COAL-FIRED JJ
GA. NNP
VACATED VBN VBD
KARATE NNP
BOTCHED VBN JJ
CLAWS NNS
STRAINERS NNS
TECHNOLOGICAL JJ
CONVERGED VBD
MADRID-BASED JJ
HALOGEN NN
UNDER-INCLUSION NN
PERMITTING VBG
RIDE NN VB VBP
FUTURES-TRADING JJ
DOUBLE-A-1 JJ
DOUBLE-A-2 JJ
DOUBLE-A-3 JJ
AGNELLI-RELATED JJ
CHORUSES NNS
LYONNAIS NNP
KARATZ NNP
GAF NNP
CONFLICTING JJ VBG
INDEMNIFICATION NN
WRONGLY RB
367.40 CD
COMMUTING VBG
POP-OUT JJ
OP-ED JJ
MID-OCTOBER NNP JJ NN
STAGGERED VBD JJ
GAO NNP
CONSTRAINTS NNS
GAP NN NNP
ELLMAN NNP
LOCAL-EXCHANGE JJ
GAS NN NNP
UNDERWENT VBD
GAY JJ
BLIGHTED JJ
WRESTLE VB
PRAYERS NNS
TENOR NN
MAITRE'D NNP
DEVALUATIONS NNS
LADISLAV NNP
TOXICOLOGY NN
LESBIANS NNS
RIES NNP
NACCHIO NNP
REPURCHASED VBD VBN
BRETHREN NNS
PLASTER NN
CLAYS NNP
HASSENFELD NNP
CLAYT NNP
MAFIA NNP NN
EXTENSIVELY RB
GARDEN-VARIETY NN
RANCHES NNS
AYERS NNP
REPURCHASES NNS
INSTALLATIONS NNS
RIFE JJ
RIFF NN
IMAGE-MAKING NN
85.49 CD
SLAPPED VBD VBN
DETERRANT JJ
OPPORTUNISTS NNS
ECONOMIC-CRIME JJ
FIRST-SECTION JJ
INFRARED JJ
TWO-HIT JJ
FRESNO NNP
SLOUCH NN
TIRE-PATCHING JJ
7,000 CD
FOULING NN
RIFT NN
HULINGS NNP
THREE-PART JJ
COWEN NNP
COWER VBP
85.50 CD
MIDWESTERN JJ NN NNP
UNDRESS NN
NORTHVIEW NNP
93.75 CD
POAG NNP
BREAKUP NN
HANDPICKED VBN
THOROUGHBRED JJ NN NNP
GRUPO NNP
700,000 CD
POTPOURRI NN
TCMP NNP
RIGS NNS
ENTRUST VB VBP
BRAIDS NNS
GDL NNP
375.92 CD
RESULTS-ORIENTED JJ
ULTRAVIOLET NN JJ
GDP NNP
GDR NNP
FRIDMAN NNP
85.60 CD
754.4 CD
OVERRODE VBD
EXTRAPOLATED VBN
GEC NNP
1.5920 CD
CRASHLET NN
GLOOMY JJ
SMITHKLINE NNP
HALF-WAY JJ
GEM NN
LUNCH NN VB
GEO NNP
PREOCCUPATION NN
WAGING VBG
8.3875 CD
TENSE JJ
GET VB VBP
COLISEUM NNP NN
ANGRY JJ NNP
BAIRD NNP
EXCITED JJ VBN
PETERSEN NNP
77.56 CD
POSTIPANKKI NNP
OCCASION NN VB
PLASTIC NN JJ
1.5930 CD
CROSBY NNP
CHOPPY JJ
GAS-TAX NN
PRIVATIZING VBG
ANGST NN
DONATED VBN VBD
UNEARTHED VBD
COMPUTER-CHIP JJ NN
TERMED VBD VBN
MARIOTTA NNP
SANDHILLS NNP
TENTH NN JJ
0.0343 CD
DAWDLING VBG
ONCE-FASHIONABLE JJ
BETHLEHEM NNP
KOSKOTAS NNP
HANDICAPPED NNP NNS JJ VBN
1.5940 CD
SLOUGH VB
ULISSE NNP
WONDERED VBD
ZHANG NNP
520-LAWYER JJ
SECRETS NNS
NOTCH VB NN
WIRELINE JJ
LARGE-SCALE JJ
H&R NNP
BELLSOUTH-LIN NNP JJ
77.70 CD
DEFTLY RB
CIRCUIT-BOARD NN
LOMPOC NNP
OVERTIME NN RB
DECEASED JJ VBN
WISECRACKS NNS
WINGBEAT NN
THIELSCH NNP
AMBIGUA NNP
SKETCHIEST JJS
POET NN
BRENDAN NNP
663,000 CD
GHS NNP
LORDSHIP NN
JAMBOREE NN
ENCOUNTERS VBZ NNS
CONDUITS NNS
PATRIARCHAL JJ
RILE VBP
EFFECT NN VB
SLOWEST JJS
UTOPIA NN
HORSHAM NNP
236.09 CD
UHLMANN NNP
RILL NN NNP
HATAKEYAMA NNP
5,441,000 CD
GRANDKIDS NNS
GIG NN
BALLISTIC JJ
NOTED VBD VBN JJ
VIRGINIANS NNPS
GIL NNP
340.7 CD
GIN NN
ANGOLAN JJ
REPORTED VBD VBN JJ
LUNGS NNS
SETON NNP
RIMA NNP
NOTES NNS VBZ NNP NNPS
WARDAIR NNP
WITCHCRAFT NN
DIRECTORSHIP NN
BASEBALL-LOVING JJ
REPORTER NN
TUCKING VBG
360,000 CD
BUKSBAUM NNP
6.056 CD
ASQUITH NNP
JESSICA NNP
BANKRUPTCY NN NNP
TONE-GENERATING JJ
CANDICE NNP
PLIGHT NN
1915-1923 CD
236.23 CD
RING NN VB VBP
FURIOUSLY RB
250,000-SQUARE-FOOT JJ
POHS NNP
DECEPTION NN
260.5 CD
INGENUITY NN
TINGLEY NNP
ECLIPSING VBG
RESULTANT JJ
COMMEND VB
DUCHOSSOIS NNP
RIPOFF NN
MEXICANA NNP
WALLPAPER NN
NON-INDIAN JJ
BOTANY NN
UNDERTAKINGS NNS
PENINSULA NN NNP
CONSTRUCTION-ORIENTED JJ
34.625 CD
COMMENT VB NN NNP
1.5990 CD
MEXICANS NNPS
SMOOTH JJ VB
BACTERIA NNS
TELECINES NNS
BRENDEL NNP
RIOT NN
NOVEMBER NNP
HAND-CARRIED VBN
HIGH-END JJ
LONG-ESTABLISHED JJ
NORMAL JJ RB
PLASTOW NNP
FULLER NNP JJR
SALICYLATE NN
RECIPES NNS
NORMAN NNP
REAFFIRM VB
NUDE JJ
ULTRAMODERN JJ
SANFORD NNP
RIPE JJ
RACETRACK NN
PANISSE NNP
MCCULLOUGH NNP
190,000 CD
ANGLO-DUTCH NNP JJ
CANDIES NNS
GMC NNP
MEGA-CRASH NN
LUCKED VBD
180.3 CD
638,000 CD
180.7 CD
180.9 CD
FLOUNDERED VBN
COMBATTING VBG
F-18S NNS
DETERGENTS NNS
GALAMIAN NNP
INUNDATED VBN
BRAINS NNS
BLOSSOM NNP
H-P NNP
GNP NNP NN
CRITIQUE NN
SMURFIT NNP
DETERRED VBD
ASSEMBLED VBN VBD
1-2-3 NNP JJ
KAREN NNP
ANNIVERSARY NN
POLK NNP
62-A-SHARE JJ
POLL NN NNP JJ VB
NON-LIFE JJ
POLO NNP
GOD NNP
FESTOONING VBG
POLS NNS
5.625 CD
REASSURING JJ VBG
PURSUE VB VBP
GON VBG VB
CATHLEEN NNP
GOP NNP
WORSENED VBN VBD
URALS NNS
LANDED VBD VBN
GOT VBD VBN VBP VB NNP
ESPECIALLY RB
SHREWD JJ
MCDERMOTT NNP
RECUPERATE VB
PETERSON NNP
SETUP NN
RISC NNP
AUTHORITIES NNS NNP
RISE NN VB VBP
236.74 CD
GPA NNP
RAIMONDO NNP
RISK NN VB VBP NNP
236.79 CD
RATIONALE NN
HOTDOG NN
EXPENSIVE-TO-PRODUCE JJ
MINATO-MIRAI NNP
DEW-SODDEN JJ
STURDY JJ
GREATNESS NN
RESTARTED VBD VBN
HOUSTON-MONTGOMERY NNP
RITA NNP
POND NNP
RITE NN
PONG NNP NN
COMMENDS VBZ
DAIGNAULT NNP
FENUGREEK NN
PERMANENCE NN
BLOCKS NNS VBZ
RITO NNP
PONS NNP
246.6 CD
TOILED VBD
GRATUITIES NNS
PONT NNP
CD-ROM NN
ALLOTMENTS NNS
246.9 CD
DEPLORING VBG
RITZ NNP
PUBLIC-LAND JJ
RAOUL-DUVAL NNP
BACK-YARD JJ
CEDERGREN NNP
TOILET NN
TELEGRAM NN
STEINBACH NNP
COMPTROLLER NN NNP
POOF NN
CONTEMPLATING VBG
MCCAUGHEY NNP
42.875 CD
165,000 CD
DISCLAIMS VBZ
DECEPTIVE JJ
POOL NN NNP VBP
CARRIERS NNS NNP NNPS
EPICUREAN NN
HALF-BROTHER NN
GRE NNP
SHELTERED JJ VBN
POOR JJ NNP NN
POLYURETHANE NN
CADET NN
OCCASIONALLY RB
GRO NNP
STUDENT-LED JJ
GRP NNP
ARMUELLES NNP
LIGHTS NNS NNP
RACIAL JJ
GOLD-ORIENTED JJ
COUSIN NN
BILLION-DOLLAR JJ
POPE NNP NN
KARIM NNP
KARIN NNP
DISSENTING JJ
OSCAR NNP
MAHLER NNP
URGENTLY RB
PROSECUTE VB
13-POINT JJ
WASTING NN VBG
CONTEMPLATION NN
TICKS VBZ
ROBUST JJ
LUDICROUSLY RB
166.4 CD
CASTLELIKE JJ
POPS VBZ
166.8 CD
166.9 CD
DECELERATING VBG
DORFMAN NNP
SEIDLER NNP
MONSTER NN
LEHMANS NNPS
LAOTIAN JJ
WONDERING VBG
CONCLUSIONS NNS
RANGED VBD VBN
GSX NNP
DEALERSHIPS NNS
CADGE VBP
AFRICAN-AMERICANS NNPS
VITRIOLIC JJ
GUN-CARRYING JJ
NOVATO NNP
WIEDEMANN NNP
RIPOFFS NNS
RANGEL NNP
TARGETS NNS VBZ
PANORAMIC JJ
MAHFOUZ NNP
REHASH NN
LANDIS NNP
DRASTICALLY RB
BROAD-SCALE JJ
ULBRICHT NNP
SURGING VBG JJ
RANGER NNP NN
RANGES NNS VBZ
GTE NNP
HI-TECH JJ
BHAGAT NNP
UNMET JJ
HENSON NNP
POTENTIALITIES NNS
QUALITIES NNS
ORDINANCE NN
BENELUX NNP
TWENTY-FOUR CD
COLONY NN NNP
AUTOMATED-TELLER JJ NN
CLOSELY RB
PORK NN
ANALYST NN NNP
INSURANCE-REFORM NN
PORT NN NNP JJ
FOUNDED VBN VBD
CO-EXISTENCE NN
1657.61 CD
SACRIFICE VB NN
GUM NN
DEFINITION NN
TRUTHS NNS
GUN NN NNP
SEISHO FW
CARROT NN
PINGING VBG
JACQUES-FRANCOIS NNP
GUR NNP
GUT NN VB
NUMB JJ
NATURALISTIC JJ
FOUNDER NN
GUY NN NNP
SHOPKEEPER NN
POSE VB VBP
BUHRMANN-TETTERODE NNP
ASCRIBE VBP
POSH JJ
PENCIL NN NNP VB
PUNCHING NN VBG
HILLS NNP NNPS NNS
FITZWATER NNP
HILLY JJ
NAACP NNP
SLUDGE NN
IBM-COMPATIBLE JJ
POST NN VB NNP JJ IN
HISPANOIL NNP
BLONDES NNS NNPS
DISCOLORED VBN
NOTRE NNP
STALLED VBN JJ VBD
CROSSE NNP
BLURRED VBD
LASERSCOPE NNP
NUCCI NNP
PUTNAM NNP
PROMISING JJ VBG
EMBODIED VBN
LAUNCH VB NN
CAPITAL-GAINS NNS JJ NN
NUNN NNP
TICOR NNP
EDNEE NNP
INCUMBENT JJ
POTS NNS
ACCEPTANCE NNP NN
EMBODIES VBZ
STAPLE NN JJ
HYGIENE NN NNP
FREE-FALL NN JJ
CHEATERS NNS
REVERBERATING VBG
105.39 CD
BULBS NNS
WELL-POLISHED JJ
VIBRATION-CONTROL JJ
TRANSFUSION NN
EXPEL VB
SCORPIO NNP
KARNS NNP
POUR VB VBP
FIFTEENFOLD RB
CONTEMPTIBLE JJ
GRAVES NNP
NO-WALLS-NO-DOORS JJ
GUEVARA NNP
COLORS NNS
TWENTIES NNP NNS
RAW-STEEL JJ NN
WYLY NNP
CONTRACEPTIVE JJ NN
DURNEY NNP
MOVIESTAR NN
FUEL-SERVICES NNS
LOOKED VBD VBN
KAROS NNP
PORSCHE-LIKE JJ
DESIGNATIONS NNS
CATHCART NNP
INSTIGATED VBD
GUINNESS NNP
APPLIANCE NN
17-MEMBER JJ
EFFETE JJ
BRIMSTONE NN
RESOLUTION NNP NN
RECESSION-INSPIRED JJ
CLUGGISH NNP
UNDERPERFORMING VBG
1987-STYLE JJ
PITMAN-MOORE NNP
MOBILE JJ NNP
GERMONT NNP
4.6875 CD
LEACH NNP
WILKINSON NNP
LANDOR NNP
SANDINISTAS NNPS NNS NNP
CATEGORICALLY RB
ACHENBAUM NNP
RIVALRY NN
PEAKED VBD JJ VBN
395,374 CD
WYNN NNP
WYO. NNP
TOTALLING VBG
ASSUME VB VBP
SHRIEKED VBD
DOERFLINGER NNP
ONCE-MORIBUND JJ
KEYSTONE NNP NN
POISON-PILL JJ NN
APPELLATE JJ NNP NN
ANTONOVICH NNP
DROP-OFF NN JJ
CZECHOSLOVAKS NNPS
MID-SIZE JJ
EDNIE NNP
LEADS VBZ NNS
EURODEBENTURES NNS
LONGING NN
PEYRELONGUE NNP
HAR-LEV NNP
LOG-ROLLED VBD
INVENTING VBG
ANALYZE VB VBP
MERTON NNP
1,750,000 CD
MACPOST NNP
BELLRINGERS NNS
FALLOFF NN
WAITE NNP
IMPROVING VBG NN
CLOSEST JJS
IFAR NNP
SOUND\/GRAPHICS JJ
DEFINITIVE JJ
WAITS VBZ
MOISES NNP
99.1 CD
STATIONERY NN
PRE-EMPTED VBD
99.3 CD
MODULAR JJ
99.5 CD
99.7 CD
BEREFT JJ
VAX9000 NN
99.8 CD
99.9 CD
INVENTION NN
IMPERIALISM NN
INTERVIEW NN VB
F16S NNS
FABRICATION NN
RUBINFIEN NNP
SUBCOMPACTS NNS
BALANCE NN VB NNP
UNSUBORDINATED JJ
NUTS NNS
COMMISSIONED VBN VBD
NBC-TV NNP
LANDRY NNP
NUTT NNP
INFUSION NN
LEAFY JJ
DARIEN NNP
THIN-TIRED JJ
COMMISSIONER NN NNP
WAIVE VB
GRANDIOSE JJ
SALESPEOPLE NN NNS
FOLKLORE NN
BEGGED VBN
GIRLS NNS
BARTLETT NNP
BULLHORN NN
CITY-TYPE JJ
ANTI-CRIME JJ
OPAQUE JJ
INFLUENCE-PEDDLING NN
DECORUM NN
FIXED VBN JJ VBD
LOWER-GROWTH JJ
AMPLIFY VB
FELONIES NNS
AURAL JJ
DOUBLE-JOINTED NNP
OWINGS NNP
TRIPHOSPHOROUS JJ
LASTED VBD VBN
FIXES NNS
F18S NNS
UNSOLICITED JJ
INTACT JJ
WYSE NNP
REPATRIATE VB
RACINE NNP
SOLVENCY NN
ASSURE VB
PANTAGES NNS
LEAHY NNP
RACING VBG NN NNP
BASKETBALL NN NNP
WYSS NNP
CATCHER NN
ROUGH-AND-TUMBLE JJ
CATCHES VBZ
DESPONDENCY NN
AFFECTS VBZ
MAGED NNP
UNSCATHED JJ
CUTLASS NNP
BOAT-BUILDING JJ
HIGHEST-RANKING JJ
AMERICAN-MADE JJ
RECAPITALIZATIONS NNS
AFRICA NNP
DISCOUNT NN JJ NNP VB
UNAVOIDABLE JJ
1990-91 CD
1990-94 CD
PIZZA NNP NN
REGRETTABLE JJ
GAMETOCIDE NN
BASE-RATE JJ
BRICKLAYERS NNPS
PIZZO NNP
SHAKE-UP NN
MIG-23BN NN
EYE-BLINK NN
GILLES NNP
WOOD-AND-BRASS NN
DORIS NNP
FEDERALIST NNP
REGRETTABLY RB
COMMENTS NNS VBZ NNP
SLINGERS NNS
BULKY JJ
ADVERTISING-BACKED JJ
THEREAFTER RB
SOFTLETTER NNP
EXAMINERS NNS
1982-83 CD
1982-84 CD
IFFY JJ
TOWERING JJ VBG
WIDER-THAN-EXPECTED JJ
TIGHTEN VB VBP
INDEPENDENTLY RB
HIGH-PAYING JJ
CUTRER NNP
TIGHTER JJR RBR
GLAD JJ
PALLADIUM NN
KASS-PEDONE NNP
NOMADIC JJ
MICKEY NNP
BULLS NNS NNPS
TRUMPETS VBZ
HOMERED VBD
SIMMONS NNP
TUSCANY NNP
MEXICANOS NNP
88-POINT JJ
BULLY NN
ADROITLY RB
NARRATOR NN
AUSTERITY NN
HAD VBD VBN
PRECONDITION NN
1974-75 CD
DUPLICATIONS NNS
PERMANENTE NNP
NUYS NNP
LEAKS NNS
HAL NNP
LEAKY JJ
HAM NN
BROCHURE NN
HAS VBZ VBP VBN
ASSEMBLYMAN NNP
HAT NN
HEWLETT NNP
80-NATION JJ
ENROLLMENT NN
MONTEDISON NNP NN
HAY NN NNP
NUCOR NNP
138.625 CD
PROCEDURE NN NNP
HERMANN NNP
STILL-UNCALCULATED JJ
1974-81 CD
CALCULATE VB VBP
BOOKKEEPING NN
ACCEPTING VBG
REJOINED VBD
PROPEL VB
HBJ NNP
PLANETS NNS
PRUDENTIAL-BACHE NNP
PROPER JJ
VERSIONS NNS
HBO NNP
DATA-STORAGE JJ NN
ANTI-CLOTTING JJ
PAYMENT NN
REINSURER JJR
LEBANESE JJ
DICTAPHONE NNP NN
FLY-FISHING NN
DARLING NN
MAGIC JJ NN NNP
LIPMAN NNP
CONTAINERIZED-CARGO NN
STEPHENS NNP
POINT NN VBP VB NNP JJ
TIME-WARNER NNP
MANITOBA NNP
FORENSICS NNS
ADVICE NN NNP
PERSONIFICATION NN
LAMAR NNP
BENDIX\/KING NNP
WEAVING VBG
PRE-MARGIN JJ
LEXINGTON NNP
VORACIOUS JJ
DISCREPANCIES NNS
RACISM NN
BERENS NNP
TECHNICALITY NN
RACIST JJ NN
INOPERATIVE JJ
INFRINGEMENT NN
CAMARO-FIREBIRD NNP
WARHOL NNP
35.125 CD
PARODY NN
JAUNTILY RB
LITANY NN
HULKING VBG
LEANS VBZ
AILING VBG JJ
UNFATHOMABLE JJ
FIELDS NNS NNP VBZ NNPS
URBAN JJ NNP
HDM NNP
REMUNERATED VBN
GLEE NN
SLOWBALL NN
POLLED VBN VBD
AFIELD RB
GLEN NNP
CAR-MARKET NN
REMNANTS NNS
755.9 CD
SELECTED VBN VBD JJ
POLLEN NN
PETRUZZI NNP
TEMPERATURE NN
DANUBE NNP
HEE UH
TWO-WEEK JJ
ANGLO-FRENCH JJ
DARING JJ
HEI NNP
POSITIVELY RB
PIGLETS NNS
HEM NN
USINOR-SACILOR NNP
INTAKE NN
SLOVES NNP
REVOLUTIONIZE VB
HER PRP$ PRP
DIARRHEA NN
VICTORIA NNP
RELATIVELY RB
EITHER CC DT RB NNP
WANTED VBD VBN JJ
HEY UH
F-20S NNPS
SAHOUR NNP
LEAPS NNS
LEAPT VBD
CREDITING NN VBG
AUSPICES NNS
DEMONIZED VBN
MINING NN NNP VBG
CARIBOU NN
TUTORIALS NNS
INTEGRATED NNP VBN JJ
27,500 CD
OXIDIZER NN
HOT-DIPPED JJ
AFRIKA NNP
EARTHQUAKE-RAVAGED JJ
APPALACHIAN NNP
TECHNICIAN NN
CHAMBERLAIN NNP
MEANWHILE RB NN
BARDAGY NNP
NO-STRIKE JJ
TEIJIN NNP
MAGNA NNP
4\/32 CD
TIGHTLY RB
BROWNING NNP
BACTERIAL JJ
JIANG NNP
AEGIS-CLASS JJ
ANTECEDENTS NNS
CATANIA NNP
LEARN VB VBP
BIRTCHER NNP
AUDACITY NN
ACTIVATED VBN
REGULARLY RB
TRANSIENT JJ
BRISTLED VBD
SUBSTANDARD JJ
LIQUIDS NNS
RISERVA NNP
GLIB JJ
FIREPLACES NNS
LEANING VBG NNP
PULKOVA NNP
HHS NNP
TYPHOONS NNS
HUMAN-BASED JJ
EVOLUTION NN
ENVIRONMENTS NNS
BRISTLES VBZ
3,288,453 CD
ENTERTAIN VB
LEASE NN VB NNP VBP
BELFRIES NNS
LEASH NN
WITNESS NN VB NNP
TIDAL JJ
POLLIN NNP
AGENDAS NNS
HIB NNP
GOODWILLS NNPS
HID VBD
STOCKBROKERAGE NN
LEAST JJS RBS
DROP-OUT JJ
HIM PRP
INDEBTED JJ
HIP NN
ALBUMS NNS
HIS PRP$ PRP
SOUTHEASTERN JJ NNP
HIT VBD VBN VB NN VBP
BERETS NNPS
PRESAGE VB
SKIRMISHING NN
FLOUTING VBG
OVERPOWER VB
AFFLICTS VBZ
CHARLATAN NN
IRKED VBN VBD
SUPER-EXPENSIVE JJ
43.375 CD
URINARY-TRACT NN
LEADING-EDGE JJ
PAPETTI NNP
HK$ $
FALLOUT NN NNP
SUNCOR NNP
UPHAM NNP
BIDDERS NNS
3,102,935 CD
TRUCK-BUILDING JJ
RIPPED VBD VBN
PROTOCOLS NNS
MOTIONS NNS VBZ
BENACKOVA NNP
MOONLIGHTING NN NNP VBG
RIOTS NNS
IGNAZIO NNP
RIPPER NNP
BUDGET-REDUCTION JJ
SNOOZING VBG
261.3 CD
719,000 CD
CZECHS NNPS
PAROLE NN
SORRELL NNP
DEVASTATED JJ VBN VBD
MACHESKI NNP
WHITE-WALLED JJ
GAITHERSBURG NNP
ASSET-BACKED JJ NNP
FLOPPY-TIE JJ
ACCORDING VBG
MULTIFAMILY RB JJ
LEAVE VB VBP NN
CAWDRON NNP
STEELS NNS
STEELY JJ
GOALS NNS
HADLEY NNP
SATIRICAL JJ
DESSERT-MENU NN
IGNITION NN
BEYOND IN NNP RB
ITEMS NNS
GALLANT JJ
HARD-HITTING JJ
HLR NNP
DEPARTED VBD
GOLFERS NNS
SUFFERED VBD VBN
LINSEY NNP
ENTRENCH VB
416,000 CD
TIDES NNS
SCHMIDLIN NNP
PALMTOP NN
181.9 CD
407.9 CD
CENTIMETERS NNS
SEALTEST NNP
COXON NNP
11-MEMBER JJ
HMS NNP
LAMLE NNP
WALLOPING NN
FLASHIER JJR
POTATOES NNS
HOTELS NNS NNPS NNP
ADMISTRATION NNP
SCHOOL-SPONSORED JJ
SENSATION NN
ABITIBI-PRICE NNP
THROMBINAR NNP
DARK-BLUE JJ
78.625 CD
SUTURES NNS
DEFUSE VB
INTERNATIONALLY RB
ERIC NNP
ERIE NNP
VALERIE NNP
ERIK NNP
PRESALE JJ NN
NOTHIN NN
GLOP NN
VOLOKH NNP
TAKEOVER-PROOF JJ
FOGGS NNP
18.375 CD
CONFIDENCE-CRUSHER NN
19,395 CD
WATSONVILLE NNP
HOA NNP
GLOW NN
HOC FW NNP
ACTUAL JJ
FOGGY JJ
OWENS-ILLINOIS NNP
HOE VB
HAMPER VB
TRYING VBG
SOLVENTS NNS
HOG NN NNS
TOUCHING VBG NN JJ
SEIDMAN NNP NN
IMMODEST JJ
CANCER-CAUSING JJ
KOWALSKI NNP
HOP NN
DISBURSEMENTS NNS
HOT JJ NNP
WISEGUY NNP
NEIGHBOR NN
HOW WRB
HOY NNP
MASKED VBN VBD
PROCARDIA NNP
AIN'T-IT-GREAT-TO-BE-A-TEXAN JJ
CUMMINS NNP
FOREHEAD NN
LINEMAN NN
MASKET NNP
ISTITUTO NNP
WATERED VBD
HORSE-BREEDING NN
OFFERING NN VBG NNP
DISTRESS NN
RAEDER NNP
CRONYISM NN
COST-EFFECTIVE JJ
NEXT-GENERATION JJ
ACCOUNT-CHURNING NN
SHIGEZO NNP
254,200 CD
PIXLEY NNP
JUST-DEPARTED JJ
LAMOS NNP
HEALTH-ORIENTED JJ
REFUGEE-ASSISTANCE NN
HOMERUN NN
247.3 CD
MASSEUR NN
247.6 CD
FREEDOM NN NNP
READMIT VB
GIANTS NNS NNP NNPS
RETROACTIVE JJ
ERLE NNP
UNAFFORDABLE JJ
RIPPLE NN VBP JJ
LAMPE NNP
DRUMBEAT NN
DEALING VBG NN
STEERS VBZ
KOERNER NNP
INTERIOR-DECORATING JJ
BARFIELD NNP
LAMPS NNS
PHERWANI NNP
OVEREAGER JJ
HRH NNP
6,773 CD
INCONVENIENCE NN
INTELSAT NNP
ERMA NNP
KARNSUND NNP
RHYTHMIC JJ
NINE-TENTHS NNS
LOW-ABILITY JJ
INTERRUPT VB
DUTIES NNS
LYNCHBURG NNP
PIGGYBACKING VBG
SKILL-DILUTION JJ
DEVOTIONAL JJ
CONSISTS VBZ
CONVERTIBILITY NN
EAVESDROPPING NN
STATE-SUPERVISED JJ
EMANCIPATION NNP
ADVISE VB VBP
TIME-LIFE NNP
PATENT-INFRINGEMENT NN
343,333 CD
20.2 CD
20.3 CD
167.7 CD
INCLUDE VBP VB
CORNEAL JJ
20.4 CD
20.5 CD
167.9 CD
20.6 CD
20.7 CD
20.8 CD
20.9 CD
NO-LAYOFF JJ
BOOMING JJ VBG
TOMASH NNP
DUANE NNP
BASTION NN
HSU NNP
OZONE-DEPLETING JJ
PUBLIC-TV NN
RECKLESS JJ
CEASELESSLY RB
GOATS NNS
RECRUIT NNP VB NN
PROCEEDING VBG NN
ELECTRIC NNP JJ NN
6,799 CD
POOREST JJS
NOT-SO-FAVORITE JJ
GLUE NN
EXPENDITURE NN
WINDING VBG
PHILIPPINE JJ NNP
INDEXATION NN
GLUM JJ
HALFHEARTED JJ
WORKING-GIRL NN
GLUT NN VB
300-YEAR-OLD JJ
PHONED VBD VBN
DIMINISHED VBN JJ VBD
HUB NN NNP
COLLOQUIES NNS
HUD NNP
2000 CD
2001 CD
HUG NN
2002 CD
HUH NNP
2003 CD
CARSON NNP
2004 CD
2005 CD
2006 CD
2007 CD
HUM VB NN
2008 CD
HUN NNP
2009 CD
PRESENT-DAY JJ
CONFIRMING VBG
PHONES NNS VBZ
NECESSARY JJ
DIMINISHES VBZ
TRANSPORT NN VB NNP
BASKETS NNS
REDGRAVE NNP
HUT NNP
PHONEY JJ
EQUALING VBG
HUY NNP
LENDABLE JJ
SEPARATED VBN JJ
CENTER-AISLE NN
GEARING VBG
NEUBERGER NNP
SNOOKER NN
FEUDING VBG NN
NON-CONTROLLING JJ
2010 CD
2011 CD
2012 CD
2013 CD
HILTUNEN NNP
2014 CD
VERSICHERUNGS NNP
HOMELAND NN
2015 CD
2016 CD
RAIDERS NNS
STRINGS NNS NNP
2017 CD
2018 CD
FLASHING VBG
2019 CD
ISSUERS NNS
EXTRAMARITAL JJ
CARDIOVASCULAR JJ NNP
FUNGUS NN
SEIZING VBG
AUTONOMY NN
CONVERTING VBG
DISCOVER VB VBP NNP
CATALOG-CLOTHING-MERCHANDISER NN
2020 CD
CARCINOGENIC JJ
SPALSBURY NNP
2023 CD
LOCKING-IN NN
ROEBUCK NNP
EXPERTS NNS
2027 CD
SUBDUED VBN JJ
2029 CD
JUMBOS NNS
AWKWARD JJ
THADDEUS NNP
MOUTHED VBD
DOWNSIZED VBN
RETENTION NN NNP
HACKLES NNS
STOCKS-INDEX JJ
ERRS VBZ
SALICYLATES NNS
FULLEST JJS
PANGLOSSIAN JJ
NON-RECOURSE JJ
MAGLEBY NNP
WESSELS NNP
ANTICIPATED VBN JJ VBD
KACY NNP
JEWELS NNS
REVVED VBN
SINCERELY RB
EXTRACTS NNS
S.P.A. NNP
BREWING NN NNP VBG
CLOSURES NNS
EVACUATED VBN
CONVENED VBD VBN
ESTONIA NNP
IDENTIFIED VBN VBD
ANTICIPATES VBZ
ALTERING VBG
LASALLE NNP
REAFFIRMS VBZ
CONVENES VBZ
254,280 CD
IDENTIFIES VBZ
TEAM NN VB NNP
SIMULTANEOUS JJ
MANGINO NNP
ACQUISITION NN NNP
TEAR VB
CAPITAL-MARKET JJ
CRITERION NN NNP
SPRUCE VB
MCLOUGHLIN NNP
THREE-JUDGE JJ
MINITRUCK NN
BAKED JJ
JERRITTS NNP
TIGER-TURNED-FEDERAL JJ
FASTBALLS NNS
SLACKS NNS
COURTSHIP NN
BAKER NNP NN
BAKES NNP
FLUIDS NNS
UN-SWISS JJ
INEXORABLE JJ
204S NNS
SLACKENED VBN VBD JJ
FACT-FINDING JJ
CARBIDE-PRODUCTS NNS
STEELMAKER NN
LEMONS NNS
LEMONT NNP
DISABLED-WORKERS NNS
NUDGE VB NN
THREE-MONTH-OLD JJ
STREAMLINED JJ VBD
DAUNTING JJ VBG
GINGER NN
VANDENBERG NNP
LAWSUITS NNS NN
ELECTRON NNP
MASSIVELY RB
INEXORABLY RB
THUMBING VBG
MANAGING VBG NN NNP
WAVERING VBG NN
CHORDS NNS
NATION'S NN
TECH NNP
COMMITTED VBN JJ VBD
MALAYS NNP
COMMITTEE NN NNP
BIOMEDICAL JJ
AVANT-GARDE JJ NN
TECO NNP
LEDERBERG NNP
REPATRIATION NN
INTERCONNECTED VBN
HIGH-NET-WORTH JJ
COMMITTES NNS
WAYSIDE NN
SPARCSTATION NNP
BACTERIUM NN
930.2 CD
THRUSTS NNS
COARSE JJ
CHORES NNS
MAHAN NNP
CRUCIBLE NN
TRYOUTS NNS
BLARNEY NN
EQUALITY NN
NYMARK NNP
TEPID JJ
VOLCKER NNP
TOXIC-WASTE NN
IMPUTED JJ
RIPEN VBP
DOSES NNS
CLOSED-END JJ
KAHN NNP
RACETRACKS NNS
DEVELOPMENT NN NNP
MIND-NUMBING JJ
SA-DUK NNP
CONCESSIONS NNS
CAMDEN NNP
TEEN JJ NN
REFRESHING JJ VBG
DARALEE NNP
CORPORATION NN NNP
529.32 CD
SUNDAY NNP
PROVOCATIVELY RB
SYNGERIES NNS
FULLY-DILUTED JJ
SUBSCRIPTION NN
334,774 CD
AEROSPACE-THOMSON NNP
DIVERTING VBG
NON-BIODEGRADABLE JJ
THERMAL JJ
BUSINESSWOMAN NN
2093 CD
FORCEFULNESS NN
CORNELL NNP
REVOKED VBN
DONALD NNP
COMPUTER-SECURITY JJ
RETENTIVE JJ
WILHITE NNP
WITCHES NNS
INVITATIONS NNS
PRITZKER NNP
SPRING-TRAINING NN
SUPERCONDUCTOR NN
CAERE NNP
LOWEST-PRICED JJ
HARTWELL NNP
OVERWEIGHT JJ NN
EXTINCTION NN
MIFFLIN NNP
HELMSLEY-SPEAR NNP
WELL-INTENDED JJ
ACCOUNT NN VBP VB NNP
OUTCOMES NNS
SPOKESMAN NN
CHOIR NN
LAUNDROMAT NN
9:15 CD
545.96 CD
MILD-MANNERED JJ
FURTHER JJ RB RBR JJR VB
BERNSTEIN-MACAULAY NNP
THOUSAND CD NNP
28,000 CD
UNDERTONES NNS
ACQUISITIVE JJ
BLIND JJ NNP
19-NOV NNP
COBBLED VBD VBN
MAHER NNP
BLINI NNS
LANDSCAPERS NNS
BLINK NN VB
LYDIA NNP
GREENHOUSE NN
ALOFT RB JJ
850,000 CD
AUCTIONED VBN VBD
ANTI-CHOLESTEROL JJ
SIDE-BY-SIDE RB
SEVEN CD NNP
DOUBLE-A-MINUS JJ
WATERGATE NNP
SEVER VB
OPPORTUNING NN
REASSESSING VBG
ART-DEALING JJ
TICKELL NNP
PRIESTS NNS
NONCUMULATIVE JJ
CHOKE VB
AIMLESS JJ
DEMOLISHING VBG
CORPORATISM NN
9:30 CD
WITHDRAWAL NN
INCOMPATIBLE JJ
537.91 CD
9:31 CD
GMAC NNP
CORPORATIST NN
MISSOURI NNP
KNOXVILLE NNP
SOFTIES NNS
9:38 CD
ENGINEERS NNS NNPS NNP
STEFAN NNP
916.3 CD
THUNDERED VBD
ALOHA NNP
KAMM NNP
KAN. NNP
44,400 CD
KAMP NNP
RETARDED JJ
1,200,000 CD
SHIELDS NNP NNS
BEGHIN NNP
STRAYING VBG
SHINPAN NNP
BLOWING VBG
EVER-MORE RB
RED-HAIRED JJ
BRAVEST JJS
FROMSTEIN NNP
WARILY RB
IAN NNP
BLIPS NNS
279.39 CD
9:45 CD
KANE NNP
KANG NNP
YEAR-EARLIER JJ NN
UNPOLITICAL JJ
KANN NNP
YIELDS NNS VBZ
KANT NNP
IBC NNP
SPOKESMEN NNS NNP
IBJ NNP
6,250,000 CD
DISPROPORTIONATE JJ
IBM NNP
HOMOSEXUALS NNS
9:53 CD
DAPPER JJ
WORRIED VBN JJ VBD
ENTRENCHED VBN JJ
BACHTOLD NNP
INCIDENCE NN
FREUND NNP
TELA NNP
ENFORCERS NNS
WARING NNP
VENTSPILS NNP
MYSTERIOUSLY RB
OBLIGATED VBN JJ VBD
WORRIES NNS VBZ
FIGGIE NNP
FAULTS NNS
CHONG NNP
ARREARS NNS
BRYANT NNP
TELL VB VBP
ICE NN NNP
WORK-STATION NN
HEREABOUTS RB
FAULTY JJ
ICI NNP
PHARMICS NNP
ICM NNP
SEBASTIAN NNP
CLEMENTS NNP
CORNERS NNS NNPS
HOLEWINSKI NNP
SPRUNG VBN
TORQUE NN
RAT-A-TAT-TAT JJ
UNDERLINE VB
REGARDS VBZ
OBLIGATION NN
LOWENSTEIN NNP
COLLOQUIUM NN
EXTRANEOUS JJ
IDA NNP
HAHNEMANN NNP
MURDOCH NNP
CERTIFICATES NNS NNPS NNP
CANCER-GENE JJ
ROSENBLATT NNP
INDUSTRIAL-GASES JJ
IDS NNP
PAPER-GOODS NNS
ANTI-SONY JJ
LANCE NNP
756.3 CD
BUMPS NNS
FORMULAS NNS
DEADLINES NNS
TWO-SEATER JJ
TEND VBP VB
BUMPY JJ
SLOWED VBD VBN
OPPORTUNISM NN
RILLING NNP
TENN NNP
OTHERS NNS NNPS
502.1 CD
OPPORTUNIST NN
FORESAW VBD
SHULMAN NNP
BRAKES NNS
LEBOW NNP
TENS NNS
TENT NN
DONATE VB VBP
GRIMACED VBD
SLOWER JJR RBR
279.75 CD
CHOPS NNS
UNDERVALUED VBN VBD JJ
PROPELLANT NN
DETERGENT NN
CASH-PRESSED JJ
BLITZ NN
FINDLAY NNP
ATWELL NNP
MACHETES NNS
KARL NNP JJ
GRIMACES NNS
BEER-DISTRIBUTION NN
KARO NNP
SANDINISTA NNP JJ
SUBCOMPACT NN
LANDS NNS
ASPECTS NNS
SWEARINGEN NNP
CHAMPIONSHIPS NNS
SCHEETZ NNP
COMPROMISING VBG
KARY NNP
IFI NNP
SIERRAS NNPS
RUNWAYS NNS
1,296,000 CD
PILOT-SENIORITY NN
HOME-TEAM JJ
TIGREANS NNPS
OPPORTUNITY NN NNP
RESONANCE NN
PLAYWRIGHTS NNP
RIPPE NNP
CROUCH NN
PRECIPICES NNS
ALONSO NNP
FILIPINOS NNPS NNS
ANITA NNP
EVACUATE VB
CONVENE VB VBP
ALONE RB JJ
CHORD NN
CHORE NN
ALONG IN RB RP RB|RP
KASS NNP
J&B NNP
LANES NNS
422.1 CD
LEIBOWITZ NNP
STICKER-SHOCK NN
422.5 CD
RECALCITRANT JJ
J&L NN NNP
CONVENT NN
YUAN NN NNP
HAMMING VBG
40-YEAR JJ
LUPEL NNP
SHADOWING VBG
KATE NNP
BLOCKING VBG
DART-THROWING NN
AGREEMENTS NNS
SHORTCOMING NN
SUNSHINE NN NNP
180.60 CD
KATO NNP
YUBA NNP
CHOSE VBD
SUMMARIES NNS
19912000 CD
TICKETS NNS
PURCELL NNP
KATZ NNP
NATIONS NNS NNPS NNP
SELLOFFS NNS
NOTICE NN VB VBP NNP
BAXLEY NNP
PUPPIES NNS
ANDEAN JJ
FORESEE VBP VB
596.8 CD
LINTAS NNP
BALLHAUS NNP
156.12 CD
KAUL NNP
JENCO NNP
ONSTAGE RB
ESBER NNP
KOSSUTH NNP
CONSTITUTE VBP VB
WATCHING VBG NN
BACK-UPS NNS
MANCUSO NNP NN
EXPEDITIOUSLY RB
TERM NN NNP VB
III NNP
CARGILL NNP
NOVEL NN JJ
MAGUIRE NNP
BOARD-LEVEL JJ
GASICH NNP
TESE NNP
ARBITRAGE NN
IMPROVEMENT NN NNP
DECADENT JJ
RESALE NN
485,000 CD
GILDING NN
DEMONSTRATIVENESS NN
PENNY-STOCKBROKER NN
TEST NN VB NNP VBP
RE-ESTABLISH VB
ENJOYING VBG
CHASERS NNS
BOND-EQUIVALENT JJ
15-SECOND JJ
CARTED VBD
CHORUS NN
DECADE NN
CONCENTRATE VB VBP NN
IKE NNP
CLIMBS VBZ
CARTEL NN
262.4 CD
6,805 CD
CONVERT VB VBP
TOPPING VBG
CARTER NNP
UNDERGIRDING NN
CONTINUE VB VBP
DASHIELL NNP
DUBBED VBN VBD
DELINQUENCIES NNS
REVALUATION NN
REMARKED VBD VBN
IMPELLED VBN
DELEGATES NNS NNPS
18.443 CD
TRIAD NNP
REINFORCING VBG
SCHLESINGER NNP
THREATENING VBG JJ
NOTIFY VB VBP
CRIMPING VBG
CO-AUTHORED VBN
TRIAL NN NNP
87.375 CD
ILK NN
ILL NNP JJ RB
RADICALS NNS
O'CONNOR NNP
LANKA NNP
SLOWLY RB
KAYE NNP
JEEP\/EAGLE NNP
STRICKLAND NNP
UNIVERSE NN
FREE-MARKET JJ NN
WELDED VBN
UNPREPARED JJ
TRIBE NNP NN
SOCIALISTIC JJ
IMA NNP
182.1 CD
HIGH-TEMPERATURE JJ
IMF NNP
271,124 CD
182.6 CD
182.9 CD
AUTOCRAT NN
ORGANIZED VBN JJ VBD NNP
ANASTASIO NNP
CHECKROBOT NNP
SUNDRY JJ
IMO NNP
PAINTERS NNS
ABSTRACTS NNS
COLOGNE NNP
IMS NNP
MORATORIUM NN
ORGANIZER NN
ORGANIZES VBZ
MISREPRESENTS VBZ
IMPLEMENTED VBN VBD
RECOMMENDATION NN
ALOUD RB
HINDU NNP
POCKETS NNS VBZ
INC NNP
IND NNP
TRICK NN VB
COMBINE VB VBP
GERHARD NNP
ING NNP
COMBING VBG
TEX. NNP
SCHLOSS NNP
INK NN
IMMUNITIES NNS
STARCH NN
INN NNP
SCRATCH NN VBP VB
SOULFUL JJ
SLAYINGS NNS
REPLENISH VB
BARKLEY NNP
INS NNP
FINANZIARIA NNP
SOMERSAULTING JJ
MEVACOR NNP
SCHEME NN
HINES NNP
BEAZER NNP
RUNNER NN NNP
FINANZIARIO NNP
CONSERVATION NN NNP
ITALIANATE JJ
328.2 CD
EXPANSIONISM NN
6,840 CD
HOWEVER RB WRB
RICHMAN NNP
SUMMARILY RB
FARMING NN NNP VBG
TEXT NN
EYEWITNESSES NNS
UNO-VEN NNP
WEINBERGER NNP
FOOD-POISONING JJ
ADVERTISED VBD VBN JJ
GALAXIES NNS
876,706 CD
J.V NNP
DAYTON NNP
KETCHIKAN NNP
156.82 CD
ACTRESS NN
156.83 CD
ROOM-RATE JJ
BAVARIA NNP
TRIED VBD VBN JJ
BICKERED VBN
AIR-CONDITIONED JJ
ADVERTISER NN NNP
ADVERTISES VBZ
SOCHAUX NNP
STICK VB NNP VBP NN
STARED VBD
YANKEE-COME-LATELY JJ
TRIES VBZ NNS
AIR-CONDITIONER NN
IPO NN
ADVOCACY NN
HINGE VB
NEWSWEEKLY RB
CHASTENED VBD VBN
SNAPSHOT NN
JOSTLE VBP
CONTRAPTION NN
STARES NNS
CONSTRUE VBP VB
PANICKING VBG
ASSISTING VBG
MECHANIZED JJ
TERRIBLE JJ NNP
JENKS NNP
248.2 CD
248.3 CD
KHAD\/WAD NN
BORING JJ VBG NN
TIE-UPS NNS
PICOCASSETTE NN
DRUG-TRAFFICKING JJ
FIVE-YEAR JJ
TUG-OF-WAR NN
PILLORYING VBG
TERRIBLY RB
KATHE NNP
TRITIUM NN
EVANGELIST-INDUSTRIALIST NN
PASTEURIZED VBN
60-VOTE JJ
VIOLET NN
PROTESTANT JJ
ANTI-VIRAL JJ
148.85 CD
HILDER NNP
PERSONALITY NN
IRA NN NNP
TISSUE NN
INSPECTED VBN VBD
IRE NN
KATHY NNP
CAFES NNS
YULI NNP
OBLIGATTO NN
IRK VB
CONVEYS VBZ
GRAMM-RUDMAN NNP
STAIN-RESISTANT JJ
21-9 CD
PERMIAN NNP
TICKETED VBN
IRS NNP
LACHES NN
CALLABLE JJ
LONG-STANDING JJ
REFILE VB
SENTIMENT NN
LECTURED VBD
BECTON NNP
STIFF JJ NN
CONSERVATISM NN
168.1 CD
GORENSTEIN NNP
AUTHORIZED VBD VBN JJ
DURABLE JJ
21.1 CD
21.2 CD
6,881 CD
168.7 CD
21.3 CD
21.4 CD
ISI NNP
METALLURGICAL JJ
LECTURER NN
21.5 CD
LECTURES VBZ
21.6 CD
RESPONSIBILITIES NNS
21.7 CD
PENT-UP JJ
21.8 CD
21.9 CD
KUVIN NNP
AUTHORIZES VBZ
NOTING VBG
KNOWLEDGEWARE NNP
UNDER-REPORTED JJ
TRADING-ORIENTED JJ
TRIBUTES NNS
COERCION NN
HACKMAN NNP
SOLUBLE JJ
NATIONAL NNP JJ
DONBAS NNP
SYLLABLE NN
DIMING NN
TERRENCE NNP
FUNDRAISING VBG NN
BINDING JJ VBG
MODELL NNP
TRANSACTING VBG
ITC NNP
INCIDENTS NNS
MODELS NNS
DISPOSITIONS NNS
TRADITIONALIST NN
SUSPENDED VBN VBD JJ
SPIRAL NN
BENAZIR NNP
ITO NNP
STRUGGLE NN VB
SUCCEEDS VBZ
ITS PRP$
ITT NNP
PERSISTED VBD
CRABBY JJ
NOTION NN
ESOP NNP
MCGINLEY NNP
REFINE VB
DETHRONED VBN
TROUBLE NN JJ
MOZART NNP
TORRES NNP
SIKES NNP
CHARACTERS NNS
HOSPITALIZATION NN
AFRICAINE NNP
2100 CD
ECONOMISTS NNS NNP NNPS
MODEMS NNS
TRANSACTION NN
CARTON NN
INSTANCES NNS
ARBITRARY JJ
VIOLIN NN NNP
MERVIN NNP
SANCTIONS NNS VBZ
CONCEDED VBD VBN
ESPN NNP
BALAG NNP
BULWARK NN
PENTAGONESE NNP
CONSERVATIVE JJ NN NNP
ESPS NNPS NNS
PLACIDO NNP
FACT-BOUND JJ
SHIFLETT NNP
HEILEMAN NNP
CONCEDES VBZ
MIDWEEK NN JJ
GEOGRAPHICAL JJ
DUDGEON NN
LESS-THAN-ALARMING JJ
LANTZ NNP
RACKED VBN VBD
OPERABLE JJ
STARKE NNP
MCCAW NNP NN
NEVADA NNP
UNEVEN JJ
SPLINTER NN
COSMOPULOS NNP
LICENTIOUSNESS NN
FLOCKED VBD VBN
IVY NNP
SUBMARINES NNS
RACKET NN
TAITTINGER NNP
NON-EDIBLE JJ
SHORTCOMINGS NNS
BOUNCED VBD
BILANZ NNP
DESPOTS NNS
BLESSED VBN
COOLANTS NNS
35588.36 CD
UNSWAGGED JJ
SORGHUM NN
ASTOUNDED JJ
AGGREGATE JJ NN
GREETINGS NNP NNS
27.50-A-SHARE JJ
PERSONALIZE VB
BRUISED VBN
BOUNCES VBZ NNS
WOUNDED VBN JJ
PROLIFERATING VBG
HIROSHI NNP
COLLISION-DAMAGE NN
BERLAND NNP
FACULTY NN
HANGOVER NN
BRUISES NNS
LOMBARD NNP
SIKHS NNPS
WORST-PERFORMING JJ
SUSPECTING VBG
FORESTS NNS
CRUDES NNS
COLORFUL JJ
1.9000 CD
CLEARINGHOUSE NN
YURI NNP
HOUSEHOLD NN JJ NNP
EXPORTERS NNS
CARLYLE NNP
DRUBBING NN
IXL NNP
BUNCH NN
LABOR-INTENSIVE JJ
TORRID JJ
BUNCO NN
14-MONTH JJ
KRISHNAMURTHY NNP
REBUFF NN
ESSO NNP NN
ROSALIND NNP
'30S NNS CD
MCKENNA NNP
PROLIFERATION NN
20TH JJ
SOLAR-POWERED JJ
EMULATING VBG
NEWCASTLE NNP
STILL RB JJ
MAGNIFICENTLY RB
BATTLEGROUND NN
TEAMMATE NN
SUPERPOWERS NNS
DROPPERS NNS
FIERCELY RB
FARMINGTON NNP
REGIONALLY RB
DISDAINING VBG
DETOXIFICATION NN
BRAINTREE NNP
CAROLINAS NNPS NNP
SINGLE-MALT JJ
ATTORNEY-CLIENT JJ
BUNDY NNP
MODERN JJ NNP NN
BALES NNS
AGREED VBD VBN JJ NN
CAMPAIGNED VBN
CONSUMER-PRICE NN JJ
NURTURING VBG
MARKETERS NNS NNPS
COERCIVE JJ
INTERNATIONAL-MONEY-MARKETS NN
POKED VBD
INACTION NN
ENTITLE VB VBP
ABILITIES NNS
CAMPAIGNER NN
AGREES VBZ
PAPER-MANUFACTURING JJ
WEEPERS NNS
REDONE NN
EXORCISMS NNS
LANYI NNP
FRISBEE NNP
POKER NN
CONSISTING VBG
POKES VBZ
FREE-WHEELING JJ
STING NN
BALANCHINE NNP
PROFITABLE JJ
ARMADILLOS NNS
STINK VBP
MERGING VBG
MODEST JJ
GENETICIST NN
TOMOSHIGE NNP
TRIPS NNS
STINT NN
BERGEN NNP
MARXIST-LEANING NNP
SHELLING VBG
SCOOPS VBZ NNS
INVOLVEMENT NN
BERGER NNP
MACLAINE NNP
J'AI FW
PROFITABLY RB
BATTLEGROUPS NNS
CHOSEN VBN NNP JJ
WIGGLED VBD
UNACCEPTABLE JJ
CONVICTS VBZ
2170 CD
DRYBRED NNP
MERINGUES NNS
CLOSENESS NN
FRAMERS NNS
DOTED VBN
FREEHOLDERS NNS
MCMANUS NNP
INSPECTOR NN NNP
KRAFT NNP
AESTHETIC JJ NN
SPIRIT NN NNP
SUMMARIZE VB
PRIVACY NN
201,870 CD
WAKUI NNP
SHORT-SALE JJ
52%-36 CD
98-POUND JJ
CUSTOMERS NNS
COASTS NNS
UNSYMPATHETIC JJ
SPUDS NNS
SELF-DECEIVED JJ
FECKLESS JJ
FOLDABILITY NN
BELL-RINGER NN
2189 CD
STATEMENT NN
CIVIL-SERVICE JJ
HARTE-HANKS NNP
DARKER JJR
RICHMOND-AREA JJ
NUSBAUM NNP
PETRIFIED JJ
DABBLED VBD
SHARPSHOOTER NNP
HINTS NNS VBZ
SOCIAL-STUDIES NN
TRISH NNP
STADIUMS NNS
1.7600 CD
DELAYING VBG NN|VBG
CRIME-FIGHTING JJ
ARTERY-CLOGGING NN
ACQUIRERS NNS
PROSPECTUSES NNS
F.O.B JJ
DELETE VB
FURTHERMORE RB
POLITIC JJ
DOUBTLESS RB
COHESION NN
OFFSETS NNS
REPORTING VBG NN NNP
FUTURES-RELATED JJ
GESTURE NN
PLAYERS NNS NNPS
LECHE NNP
INTERVENTION NN
OFFICALS NNS
1462.93 CD
AVIACION NNP
52.125 CD
PROBATION NN
APPLAUDED VBD
OUTPACE VBP VB
PHASE NN VB
OIL-LEASING NN
ALPER NNP
STIRS VBZ
JOURNAL\/EUROPE NNP
CURRENCNY NN
92%-OWNED JJ
PLACING VBG NN
OGLING VBG
FORGIVEN VBN
STARTS VBZ NNS VBP
771.4 CD
THORNBURGH NNP
CERTIFICATION NN
UNCERTAIN JJ NNP
BALKS VBZ
SUB-MARKETS NNS
ROLLER-COASTER NN
HANDELSBANKEN NNP
MAIER NNP
INVESTIGATIONAL JJ
GROUNDWORK NN
LAST-MINUTE JJ
1.9083 CD
PARITIES NNS
SEWER NN
ADVOCATE NN VBP VB
EXCLUSIVITY NN
TULANE NNP
CONGRESSONAL JJ
BALLS NNS
IZVESTIA NNP
ATTRACTIVENESS NN
PIXIE-LIKE JJ
LESS-PERFECTLY RBR
BALLY NNP
STARVE VB
50\/50 CD
SHORTSTOP NN
ALLEVIATE VB
SUPREMACY NN
REGULATED VBN JJ
GLORIA NNP
EUROMARKET NNP
ALPHA NNP NN
BUY-OUTS NNS
GLASS-STREWN JJ
ANTI-HOOLIGAN JJ
DRESDNER-ABD NNP
REGULATES VBZ
JAB NN
GNAW VB
DAPUZZO NNP
MODERATE JJ VB VBP
EINHORN NNP
BALMY JJ
RAILBIKES NNS
NON-FLIGHT JJ
BLACKJACK NN NNP
JAL NNP
JAM NN VB
OVERLAP VBP VB
JAN NNP
POST-PRODUCTION JJ NN
79-CENTS-A-POUND JJ
JAR NN
2,303,328 CD
OVERLAY NN
JAW NN
GOLDMAN NNP
DISCREDITED VBN JJ
JAY NNP
UNFINISHED JJ
MEAT-PROCESSING JJ
UNFILLED JJ
LOYALTIES NNS
INSIDIOUS JJ
POWER-PLANT NN
SWITCHED VBD VBN
SKULLS NNS
DETERRENCE NN
PITCHERS NNS
CHARACTERLESS JJ
ALL-IMPORTANT JJ
PRESUMABLY RB
GASOLINES NNS
FACTUALLY RB
SP1-PLUS JJ
837.5 CD
FLEECED VBN
WOLFSON NNP
SWITCHES NNS VBZ
OLISSA NNP
BUNNY NN NNP
COMPLIED VBN VBD
RETROFIT VB
27.125 CD
OMISSION NN
24-HOUR JJ
ASPERSION NN
RESIDING VBG
MEDIATOR NN
25\/32 CD
60-40 JJ
COMMEMORATIVE JJ NN
RELATIVE-PERFORMANCE JJ
MCCOY NNP
FLIRTATION NN
WEEKDAYS NNS
CORNFLAKE-SIZE JJ
JCP NNP
MIDWEST NNP NN JJS JJ
ILL-CONCEIVED JJ
RECOGNIZING VBG
ARRANGE VB
BRUNCH NN
PRAB NNP
DARKLY RB
CONFORMS VBZ
GOLDWATER NNP
MICROCOSM NN
PRECISION NN NNP
TORSTAR NNP
SUBJECT JJ NN VB
LIFELONG JJ
PSYCHOLOGICAL JJ
RUMBLINGS NNS
INDICATIONS NNS
COHESIVE JJ
349-0126 CD
ANTIQUE JJ NN NNP
BRUDDAH FW
STARZL NNP
FOUR-STROKE JJ
MERVYN NNP
PERMITS VBZ NNS
757.4 CD
EXECUTIVES NNS NNP NNPS
SOUNDING VBG
SEQUINS NNS
ACCLAIM NN VB NNP
DIFFERING VBG
JEB NNP
WESTPHALIA NNP
MIDDLE-CLASS NN JJ
WAITING VBG NN
ACTUARIAL JJ
503.1 CD
503.2 CD
GUANGDONG NNP
SHRINKAGE NN
FIRST-HOME JJ
NOWAK NNP
JET NN VBP NNP
BIOGRAPHICAL NNP
BRUNEI NNP
BURLINGAME NNP
JEW NNP
ELECTROCARDIOGRAM NN
2645.08 CD
2653.28 CD
KILOGRAMS NNS
AUTO-REPAIR JJ
BRUNER NNP
300,000 CD
SIPHON VB
REBUTS VBZ
STORABILITY NN
FINALIZED VBN VBD
BEGINS VBZ
EXPLAINED VBD VBN
CRITICISMS NNS NNP
POLYMERS NNS
ABSOLUTISM NN
DAY-CARE NN JJ
MULTIMEDIA NNS NNP
UNSERIOUS JJ
THEFTS NNS
DESOTO NN NNP
SMOKESCREENS NNS
THATCHER NNP
MISDEMEANOR NN
UNATTAINABLE JJ
GUTFREUND-POSTEL NNP
423.3 CD
423.5 CD
NUMERATOR NN
JUMPINESS NN
APPROPRIATENESS NN
423.9 CD
WALLOPS VBZ
TWOPOINT NN
SILTED VBN
POUND-FOOLISH JJ
CALLENDER NNP
ETC. FW NNP NN
MAINE NNP
OZONE NN
BLENDED JJ
POURED VBD VBN
ZONES NNS
20-MILE JJ
HOCHIMINH NNP
MAINS NNS
BLENDER NN
DESCENDED VBD
MAINZ NNP
PREY NN VBP
DISGUISED VBN JJ
BIPARTISANSHIP NN
NOSTALGIA NN
SUBSIDY NN
NOSTALGIC JJ
INHABITED VBN
MILITARY-SERVICE JJ
EXPORT-ORIENTED JJ
RAYCHEM NNP
CAMERA NN NNP
597.8 CD
HERBERT NNP
EXAMINATIONS NNS
DISGUISES NNS
130,000 CD
IMPASSE NN NNP
DANVERS NNP
LEGISLATING NN VBG
RE-EVALUATING VBG
FIGURATIVELY RB
JIM NNP
ACTUARIES NNS
SPIRITUALLY RB
RLLY NNP
CONLIN NNP
WITHDRAWING VBG
HEART-RENDING JJ
BILBAO NNP
LAW-GOVERNED JJ
CANCELLATION NN
PAINFUL JJ
NONCOMPLIANT JJ
BLOSSOMS NNS
ILLIQUIDITY NN
FURLOUGHED VBN
HIGH-QUALITY JJ NN
SPURN VB VBP
LEGISLATION NN NNP
CURZIO NNP
SPURS VBZ
JARDINE NNP
SPURT NN VBP
GROWTH-ORIENTED JJ
NOTICED VBD VBN JJ
INTERMITTENT JJ
MERCURY NNP NN
SAINTHOOD NN
POSITION-SQUARING NN
DESERET NNP
SIEBERT NNP
GOVERNING VBG NN
FINE-TUNED JJ
AARON NNP
ENTANGLED JJ VBN
MEHRENS NNP
AIMLESSLY RB
FRESENIUS NNP
NOTICES NNS
REGULATOR NN NNP
JAZZY JJ
MARKET-DRIVEN JJ
JKD NNP
263.2 CD
TIGHTENED VBD VBN
SPEEDOMETER NN
TAILORS NNP
396,000 CD
STUNNED VBN VBD JJ
EVERGLADES NNS
UNAUDITED JJ
CLEAN VB NNP JJ
CLEAR JJ VB RB VBP
YVES NNP
STICKERS NNS
ACCELERATE VB VBP
TIGHTENER NN
STABILIZED VBD VBN
CONSERVANCY NN NNP
UNSOUND JJ
AUTOS NNS
CROSSFIRE NN NNP
DO-GOODERS NNS
BEACH NNP NN
PRIM JJ
STABILIZES VBZ
PRIVATE JJ NNP RB
PERSUADED VBD VBN
UNIT-PRICE NN
PRESCRIBED VBN JJ
CHOKING VBG
PRIX NNP
ORCHARDISTS NNS
PERSUADES VBZ
REARDING VBG
WIDELY RB
CZAR NN
WIZARD NNP
PRESCRIBES VBZ
INFLAMMATORY JJ
UPPING VBG
LIBERALIZATION NN
APOCALYPTIC JJ
JMB NNP
CANDLES NNS
TRENDING VBG
WALES NNP
BEADS NNS
BUTTRESSED VBN
BEADY JJ
DURATION NN
UNTRADEABLE JJ
MID-20 CD
NUCLEAR JJ NNP NN
WORLD-CLASS JJ
MOBILE-HOME NN
COATED JJ VBN
ANGELFISH NN
105,000 CD
BUTTRESSES VBZ
GESTATIONAL JJ
COATES NNP
K-H NNP
INTERCOM NN
REVOLVE VB
BATTERIES NNS
FIGHTS NNS VBZ
2645.90 CD
ASSUAGE VB
WIDENS VBZ
HIGH-SOCIETY NN
EXPORT-CONTROL JJ
JUSTIFIABLE JJ
FINANCIAL-RELATED JJ
AUTRY NNP
BATTERY NN NNP
JOB NN NNP
329.2 CD
JOE NNP
REINSURANCE NN NNP
DEAD-EYED JJ
JON NNP
GARGANTUAN JJ
CONLON NNP
TOOTHPASTE NN
HYPOGLYCEMIA NN
HYPOGLYCEMIC JJ
MOST-RESPECTED JJS
END-OF-SEASON JJ
RUNOFF NN
PRE-TRIAL JJ NN
PERFORMANCE NN NNP
JOY NN NNP
SHARP-RISING JJ
HALF-YEAR NN JJ
REDFIELD NNP
APPEALS-COURT NN
PETROCHEMICAL NN NNP
110-STORY JJ
MASSACRES NNS
OPERATIONALLY RB
JPI NNP
BENSON NNP
OBTAINED VBN VBD
CLINGY JJ
COMPLEMENTS VBZ
CLOGGING VBG
SCOPES NNP
MICRO-ELECTRONIC JJ
WORKSHEETS NNS
SUMMER-HOLIDAY JJ
HUDSON NNP NN
CASH-RICH JJ
STOPPING VBG NN
TAPINGS NNS
TIMBERS NNP NNS
STRIKERS NNS
PUCKISH JJ
LEGISLATIVE JJ
CORTON-CHARLEMAGNE NNP
DUCKS NNS VBZ
THREE-QUARTERS NNS
BEACHFRONT JJ
SILAS NNP
PRO- JJ
38-POUND JJ
DUCKY NNP
AVAILABLE JJ
OLDENBURG NNP
249.5 CD
ENDURED VBD VBN
795,900 CD
JR. NNP
LUCILLE NNP
MAXICARE NNP
PATERSON NNP
HEARTWARMINGLY RB
SUPPORTS VBZ NNS
10-MONTH-LONG JJ
CLINIC NN NNP
STOP-LOSS NN JJ
UNIONIZED VBD
PROD VB
KEITH NNP
INTERRUPTED VBN JJ
FORESEEN VBN
DEPENDENT JJ
PROF NN NNP
AUXILIARY JJ
GERMAN-BORN JJ
METHODICAL JJ
FORESEES VBZ
FENERTY NNP
MARMALSTEIN NNP
HUBBELL NNP
EINSTEIN NNP
PROP VB NN
QUITE-COMFORTABLE JJ
EXTORTING VBG
PROS NNS
STARPOINTE NNP
BREAK-DOWN NN
WATERFRONT NN
BICKWIT NNP
RESULTS NNS VBZ
EVENT-DRIVEN JJ
BRIEFCASES NNS
LONGLEY NNP
BESTOWED VBN
STACKED VBN
KOLBER NNP
WALKS VBZ NNS
169.4 CD
22.1 CD
MEATPACKING NN
22.2 CD
EAGLETON-NEWARK NNP
GADHAFI NNP
TATTINGERS NNPS
22.3 CD
SIDELINING VBG
22.4 CD
169.9 CD
22.5 CD
22.6 CD
STRANDING VBG
22.8 CD
INFURIATED VBD
22.9 CD
EXTORTION NN
JSP NNP
20DEC NNP
WIDEST JJS
KNOCK-OFFS JJ
MARKETABILITY NN
VENICE NNP
DETERRENTS NNS
AGAIN RB NNP
WALLS NNS
TOUGHENED VBD
TRANS-PACIFIC JJ
SLOSHING VBG
STRIPES NNS NNP
SOMMER NNP
LUEHRS NNP
SUPERINTENDENT NN
BEALE NNP
MARJORIE NNP
BOARD-LISTED JJ
UNROLL VBP
UNFOCUSSED VBN
BEALL NNP
EXPERIMENT NN
70,000 CD
2200 CD
AUDIOVISUAL NNP
GRACEFUL JJ
DESULTORY JJ
HYPERMARKET NN
YVON NNP
STEWARDS NNS
SWEATSHIRT NN
DOG-MEAT NN
IMPUGN VB
ARSONIST NN
EXISTED VBD VBN
473.29 CD
CHAMPAGNES NNS
BEAME NNP
RAPE-AND-INCEST JJ
DEMOCRATIZED VBN
TERRAZZO NN
LAVISHING VBG
2210 CD
DIVISION NN NNP
POST-HUGO JJ
KINGSFORD NNP
BEAMS VBZ
TIDEWATER NNP
ALEXANDRINE JJ
WINDOWLESS JJ
GARDENING NN VBG
BARRIER-ISLAND NN
SETTLE VB VBP
UNSEASONABLY RB
FURROWS VBZ
PACKAGED-GOODS NNS JJ
BAMBI NNP
POLAR JJ NNP
BATTERING VBG
DEPRIVATION NN
BULLDOZED VBN
BEANS NNS
IMPRESSIVELY RB
BRANCHING NNP VBG
THEORIZED VBD
STALOFF NNP
POCKETBOOK NN
SUSUMU NNP
44-CENT-A-BARREL JJ
BULLDOZER NN
MICROELECTRONICS NNS
DIAGRAM NN
PANMUNJOM NNP
60%-OWNED JJ
YACHTING NN
DISTRESSED JJ
FENIGER NNP
PROPOSING VBG
EXCLUDING VBG NNP
PLEADING VBG
BREACH NN VB
NUREMBERG NNP
NADER NNP
21ST JJ CD
PRODIGAL JJ
IMPRESSIONISM NN
YELLING VBG
YASSER NNP
IMPRESSIONIST NN JJ
SPIELVOGEL NNP
HONGKONG NNP
GREENWICH NNP
'40S CD NNS
APPENDED VBN
OSTROFF NNP
SHIPYARD NN
STATE-CONTROLLED JJ
TRAUMA NN
TEACHER-CADET JJ
IDOSYNCRATIC JJ
COMPUTER-GUIDED JJ
449.04 CD
COSMETIC JJ NN NNP
DESERTS NNS
RANCOROUS JJ
FERNANDEZ NNP
DOUBT NN VBP VB RB
CHINESE JJ NNP NNPS NN NNS
DUCTS NNS
DELISTING NN
VANCOUVER-BASED JJ
45,000 CD
AEGIS NNP NN
ASSURING VBG
VEILING VBG
CANADIAN JJ NNP NN
LAYERS NNS
OPTICALLY RB
FINANCIAL-INDUSTRIAL JJ
INSCRIPTION NN
ALLEGHANY NNP
CONSTITUTED VBD
SHOELACES NNS
QUEUES NNS
NON-WORKING JJ
SKADDEN NNP
MANDATORY-RETIREMENT JJ
CALLOWAY NNP
YAABA NNP
WALSH NNP
OWNERSHIP NN NNP
ILLUSIONS NNS
CARRY-FORWARD NN
POLES NNPS NNS
FLIGHT-TO-QUALITY NN
FASTER RBR JJR
CONSTITUTES VBZ
SILKY JJ
JEALOUSY NN
VAIL NNP
BEARS VBZ NNS NNPS
VAIN JJ
DESERVE VBP VB
MEDIA-STOCK JJ
EXABYTE NNP
WIDE-RANGING JJ
KAYOED VBN
THREE-GAME JJ
REMITTANCES NNS
PARALLELS NNS VBZ
GIMMICK NN
HAYASAKA NNP
KEOUGH NNP
SILLS NNP
NORTHBROOK NNP
LUMBERA NNP
RATCHETING VBG
SILLY JJ NN RB
1.9140 CD
NADIR NNP
BEAST NN
WAYLAND NNP
CLERK NN
AMHOWITZ NNP
FIREBALLS NNS
25-A-SHARE JJ
449.33 CD
457.52 CD
OUTSKIRTS NNS
7,500-SHARE JJ
LEINONEN NNP
INTELLECTUALS NNS
NADJA NNP
FABULOUS JJ NNP
UNDERPERFORMED VBN
DIVISIVE JJ
MESELSON NNP
PRUDENTLY RB
CATHEDRAL NNP NN
UNDERSELLING VBG
MARKETWIDE JJ
STRAINING VBG
BEATS VBZ NNS
FALLBACK JJ NN
1,350,000 CD
CLARINET NN
SKIRMISHED VBN
ACCORDED VBD VBN
VOCAL\/PIANO JJ
CRACKS NNS
STANDING NN VBG JJ
REDISTRIBUTIONISM NN
MACCABEE NNP
SKIRMISHES NNS
ITALIAN-LED JJ
OCCURRENCE NN
DOROTHY NNP
REPORTEDLY RB
IICX NNP
ARTIFICAL JJ
BRITISH-BORN JJ
1.9166 CD
BEAUX NNP
VALU NNP
NASDAQ NNP
PRAYING VBG
NORBERT NNP
LALONDE NNP
FLIGHTINESS NN
SEQUESTER NN VBP VB
FIVE-BLOCK JJ
LETTERS NNS
DONNELLY NNP
BEST-KNOWN JJ JJS
TRANSPORTATION NN NNP
MILLBRAE NNP
SECURITIES-INDUSTRY NN
22:1 CD
NON-PERFORMING JJ
WHISKERY JJ
HEIGHT NN
WERTHEIMER NNP
BRAKING NNP VBG
PONIED VBD
UNIFORM NN JJ
SIX-COUNTY JJ
MOTOR-HOME NN
RUMINATED VBD VBN
VANE NN
AEGON NNP
ANKLE NN
SWEEPERS NNS
PONIES NNS
HYPNOTIZED VBN
NINE-MEMBER JJ
SHRIFT NN
CONSIDERATION NN
60.25-POINT JJ
VANS NNS
BREAKS NNS VBZ
ALLSTATE NNP
CARRIED VBD VBN
SHIPLEY NNP
VERTICALLY RB
975,000 CD
TIMOROUS JJ
INADEQUATELY RB
SEXES NNS
CARRIER NN
CARRIES VBZ
MONTH-END NN
TERMS NNS
SEAT-FOR-THE-SECRETARY JJ
SODIUM NN
RIVALS NNS VBZ
ORWELL NNP
PATRIARCHY NN
AGENCY NN NNP
59-YEAR-OLD JJ
DARLIN NNP
APPEALED VBD VBN
PLAYFUL JJ
NUCLEUS NN
NACZELNIK FW
449.89 CD
AGENDA NN NNP
LEADERSHIP NN NNP
GOAL NN
VEHICLE-MAKING JJ
DATA-PROCESSING NN JJ
BYGONE JJ
918.4 CD
POLLO NNP
POLLS NNS VBZ
IIGS NNP
POLLY NNP
PAINED JJ
GIULIANI NNP
SKATEBOARDS NNS
CONCESSION NN
KAI NNP
WATERS NNS NNP
AWOKE VBD
SHIELD NN NNP VB
KAN NNP
OUTSELLS VBZ
60.25 CD
KAO NNP
WHITE-SPIRITS JJ
WATERY JJ
SEKISUI NNP
PROOFREADING VBG
STIRLEN NNP
KAY NNP
POCKET NN VB NNP
AUCTIONS NNS NNPS
BILLFOLD NN
LESS-CREDITWORTHY JJ
1720.5 CD
CHARACTER NN
TUPPERWARE NNP
SUPPOSED VBN JJ VBD
ONE-MONTH JJ
WATER-SUBMERSION JJ
1,458,000 CD
FRIDAY-THE-13TH JJ NN
DEFICIT-RIDDEN JJ
STACKUP NNP
MAGNATE NN
60.36 CD
838.3 CD
PASSWORDS NNS
COUNTERWEIGHT NN
FAWNING VBG
SMOLENSK NNP
342.50 CD
DETERRENT NN
1,022,000 CD
SOLUTIONS NNS NNPS
88,500 CD
BEEPER NN JJR
RESUMED VBD VBN
7,400 CD
VARO NNP
PLANT-SCIENCES JJ
COMMUNICATED VBD VBN
OVERSIZED JJ
52.25 CD
SOLUTION NN
44.08 CD
ROME-BASED JJ
GUIDANCE NN
VARY VBP VB
SLOWING VBG NN JJ
RESUMES VBZ NNS
TRANS-ATLANTIC JJ
EXPRESS-BUICK NNP
SCURLOCK NNP
QUAKE-HIT JJ
GODS NNS
BLINDFOLD NN
VASE NN
SQUABBLE NN
TELECTRONICS NNP
JOBLESS JJ
61,493 CD
CASTLING VBG
NON-VIOLENT JJ
SOFT-SELL JJ
TENDENCY NN
VASS NNP
VAST JJ
TERRA NNP NN
SILVA NNP NN
PENETRATE VB
ORNATE JJ
H.F. NNP
PEOPLE-ORIENTED JJ
GOES VBZ NNP
DISORDERS NNS
KAITAIA NNP
VEGAS NNP
TERRY NNP
KEG NNP
504.2 CD
HINTERLANDS NNS
504.5 CD
TARTANS NNS
DOLING VBG
ANGLICAN NNP
LURCH VBP
KEN NNP
CAPITALISTS NNS NNPS
KCRA NNP
DWELLERS NNS
TERSE JJ
6,420,268 CD
ROBOTICS NNP
72-YEAROLD CD
ERRONEOUSLY RB
ANTI-SANDINISTA JJ
BALLOON NN VB NNP
DRABINSKY NNP
KEY JJ NN NNP VB
DOLDRUMS NNS NN
MEDDLE VB
H.G. NNP
BANK-HOLDING JJ
TRANSPARENT JJ
LOW-RISK JJ
52.50 CD
QUAKE-RELIEF JJ
UNILAB NNP
36.13 CD
SHUTDOWN NN
SMABY NNP
SABHAVASU NNP
RESIGNATION NN
VAUX NNP
GOGH NNP
NONDEMOCRATIC JJ
TOPIARY JJ
DARLOW NNP
PROMOTERS NNS
STONEWORK NN
H.H. NNP
LIPPER NNP
MULLS VBZ
SMACK RB VBP
SHRINK VB
SHAMBLES NN
VINYL-PRODUCTS NNS
KGB NNP
424.3 CD
7,440 CD
LURED VBD VBN
36.23 CD
36.25 CD
BREAST NN
AMENDING VBG
VENETOEN NNP
LURES VBZ NNS
IMPROPRIETIES NNS
DESIGNS NNS VBZ
SHAREHOLDER-RIGHTS JJ
YANKING VBG
KYLIX NN
CROWDS NNS VBZ
AKERFELDT NNP
HYUNDAI NNP
NOTICEABLE JJ
BREATH NN
PROTECTIONS NNS
44.50 CD
WINCHESTER NNP
MANAGEABLE JJ
FURILLO NNP
28.15 CD
MACROECONOMIC JJ
36.36 CD
52.75 CD
CRACKING VBG
DESPERATELY RB
RECITAL NN
CROWED VBN
NOTICEABLY RB
EXERPTS NNS
OPPORTUNE JJ
ROACH NNP
H.J. NNP
ATTRACTING VBG
26.805 CD
CENTER-VENTED JJ
YWCA NNP
SLIPPAGE NN
PAYMENT-IN-KIND JJ
DILAPIDATED JJ
BREEDEN NNP
KERRMCGEE NNP
KIA NNP
CUCKOOS NNS
KID NN NNP
BREEDER NN NNP
MAJOR JJ NNP NN
SASKATCHEWAN NNP
HARDCOVER NN
RENT-A-LEASE NNP
DUMBER JJR
28.25 CD
KIM NNP
LURGI NNP
KIS NNP
KIT NN
ADDITION NN
PEANUT NN
CARRION NNP
SPOILED JJ VBD
TRIVEST NNP
18.625 CD
PARAMOUNT NNP JJ
HIGHLIGHT VB NN
ATTRACTION NN
WALDENBOOKS NNP
ROADS NNS
DOUGHERTY NNP
36.50 CD
SPOILER NN
LEBANON NNP
28.36 CD
CEREMONY NN
AGAINST IN NNP
BARNACLES NNS
H.L. NNP
BALLOTS NNS
ARISTECH NNP
LAPIN FW
CARVED VBN VBD JJ
CONFIDANT NN
HIGH-DEFINITION JJ NN
COMMENDABLE JJ
318.79 CD
LIQUIDATING VBG NN JJ NNP
DISCLOSURE NN
28.43 CD
264.6 CD
NON-COMPETITIVE JJ
GLOSSY JJ
LURIE NNP
STOCKING NN VBG
CARVER NNP
CARVES VBZ
IMPUDENT JJ
GOLD NN JJ NNP
GOLF NN NNP
KKR NNP
UNDERMINED VBN VBD
SLIMMED VBN
OVERCOLLATERALIZED VBN
BAD-EXPECTATIONS JJ
SCORNFUL JJ
TUMBLED VBD VBN
NOVELL NNP
ERODED VBN VBD
NOVELS NNS
JOANNA NNP
SLIMMER JJR
DISLOCATION NN
UNEXECUTED VBN
ASHLAND NNP VBP
JOANNE NNP
TUMBLES VBZ NNS
OFTEN-DISPARAGED JJ
28.53 CD
44.92 CD
GRAMMATICAL JJ
GARDEN-SHRUB NN
28.55 CD
ERODES VBZ
LIQUIDATION NN
KLM NNP
FOUR-MAN JJ
CASPITA NNP
BANKRUPT JJ VB VBP
LIPOPROTEINS NNS
BRAN-PROCESSING JJ
RECITES VBZ
TRAGEDY NN
H.N. NNP
FULFILMENT NN
DEMAGOGUERY NN
319,000 CD
SUCCEEDING VBG
TIGER NNP NN
STRAIGHT-TALKING JJ
WAMES NNP
184.4 CD
NEGLIGENTLY RB
184.9 CD
36.87 CD
PURSUED VBN VBD JJ
36.89 CD
GONE VBN VBN|JJ
MERRICK NNP
SHOWTIME NNP
SPECIALTY-CHEMICAL NN
BUOYS VBZ
NAME-DROPS VBZ
PURSUES VBZ
BLINKERS NNS
BEAUMONT NNP
LODESTAR NNP
WEARS VBZ
KEATING NNP
28.75 CD
WEARY JJ
EMPLOYS VBZ
ARPINO NNP
GOOD JJ NN RB NNP
GOLDSMITH NNP
DECADENCE NN
LONGMAN NNP
EXPOSING VBG JJ
AGONIZE VB
PRETTIER JJR
WARDENS NNS
66-YEAR-OLD JJ
SEVEN-MILLION-TON JJ
LITERATURE NN
WINE-DARK JJ
REPRINT VB
METRIC JJ NN NNP
WRECKED VBD
RELEASED VBN VBD
SHAW-WALKER NNP
FORMALLY RB
CATAMARAN NN
PLATINUM NN
L.P NNP
UNCOVERED VBN VBD JJ
COMMERCE NNP NN
DAYTIME JJ
REPRICED VBN
SMALE NNP
RELEASES NNS VBZ
PRINTERS NNS
LEUCADIA NNP
SMALL JJ NNP
26.875 CD
GASKIN NNP
CLEARANCE NN
LATE-AFTERNOON JJ
TIGHT JJ RB
LEXINGTON-BASED JJ
STATED VBN VBD JJ
VIOLENTLY RB
BENTON NNP
EXCAVATING VBG
KROGER NNP
COMMENCED VBD
203.56 CD
PAINTS NNS
STATEN NNP
SANDWICH NN
STATES NNS NNPS NNP VBZ
INEXHAUSTIBLE JJ
H.R. NNP
ATTRACTIVE JJ
BOESEL NNP
PATRICIAN NN
SIMAT NNP
AGENTS NNS NNPS
CEPEDA NNP
TWO-STEP JJ
REQUISITIONED VBD
TURNOVER NN
BREAKTHROUGH NN
SLIDING VBG
OUT-OF-REPAIR NN
GORE VB NNP
TRAVEL NN VB NNP VBP
GILMORE NNP
WARMING NN VBG VBG|NN
ISOLATED VBN VBD JJ
INSTALLING VBG
CHILLED VBN
STEINBECK NNP
SMASHING NN VBG
WITTEN NNP
PURSUIT NN
COMMITS VBZ
WITTER NNP
SEXIST JJ
ARNOLD NNP
ALREADY RB
ISOLATES VBZ
GRANTED VBN VBD JJ
CROSSAIR NNP
23-5 CD
DUCHARME NNP
NOTEPAD NN
VYING VBG
BOOK-PUBLISHING NN
HISTORIAN NN
211.96 CD
22ND JJ CD
BLOEDEL NNP
EDWARD NNP
SHUTTERED JJ VBD
PLATITUDES NNS
SIMPLISTIC JJ
CHEATING NN VBG
23.0 CD
23.1 CD
395,700 CD
FEDERATED NNP
23.2 CD
23.3 CD
RESCUE NN VB
23.4 CD
KSI NNP
WACHTEL NNP
REGATTA NNP
23.5 CD
CARE-UNIT NNP
23.6 CD
23.7 CD
23.8 CD
TRANSVAAL JJ NNP
23.9 CD
WACHTER NNP
MICROBES NNS
RANKED VBD VBN
SOVRAN NNP
SIX-YEAR-OLD JJ
TRANSFERRED VBN VBD
LEAD\/SULFUR NN
STATIC JJ
GEOSCIENCES NNS
549,365 CD
164.78-POINT JJ
3,040,000 CD
LITIGATION NN NNP
LAPSE NN
MIRAGE NNP
RIGORS NNS
ROSEMONT NNP
KAPLAN NNP
FOOLED VBN
GOV. NNP
TYPIFIED VBD
FESTIVAL NN NNP
HEWLETT-PACKARD NNP
VASES NNS
SQUABBLES NNS
NON-ALCOHOLIC JJ
REPUBLICS NNS
OLDEST JJS
REVELATIONS NNS
TYPIFIES VBZ
WILFRED NNP VBD
COLSON NNP
CONTINUALLY RB
TRANSITIONAL JJ
TRAVIS NNP
SCREECHING VBG JJ
SHOWROOM NN
BANAL JJ
OLD-TIMERS NNS
HAGGLING VBG
WATERCOLOR NN
ORDER-PROCESSING JJ
SMART JJ NNP
BEDFELLOWS NNS
MONTEITH NNP
RABINOWITZ NNP
DIVESTITURES NNS
CATASTROPHIC-CARE NN
SMALL-SCALE JJ
HUNTSMAN NNP
PERFECTION NN
ZAFRIS NNP
CLOSING NN VBG JJ VBG|NN
METHODOLOGIES NNS
10-FOLD JJ
MERRILL NNP NN
ANTI-COMMUNIST JJ
GIVEN VBN JJ
REDESIGNED VBN VBD
SMASH NN VB
SHIPBOARD NN
3,513,072 CD
MINICRASH NN
TESCO NNP
GIVES VBZ
MARLBORO NNP
HIGH-RISE JJ
GUZZLE VB
MERRILY RB
U.S.-SOUTH JJ NNP
HIGH-RISK JJ CD
SHEEPSKIN NN
PASSENGER-CAR NN
BOESKY NNP
YET-ANOTHER JJ
INCOMPATIBILITY NN
ESTABLISHMENT NN
ZAMISLOV NNP
SPECTATOR NNP NN
BANCA NNP
EURO NNP
PASSPORT NN
GRAZED VBD
HIGH-PERFORMANCE JJ NN
HOME-SHARING NN
RANKIN NNP
BANCO NNP
WAKEMAN NNP
ROARS VBZ
BEBOP NNP
PITHIEST JJS
DECONCINI NNP
GOYA NNP
YOUNG JJ NNP NN
KY. NNP
EQUITY-LIKE JJ
BONWIT NNP
KCHESSINSKA NNP
'50S NNS CD
HARD-DRINKING JJ
ARBITRAGER NN
INCENSE NN
LAUREL NNP
THAI NNP
LAUREN NNP
BANDS NNS
HUPPERT NNP
ROAST NN
THAL NNP
PRESENTERS NNS
ENVISION VBP VB
THAN IN IN|RB RB RBR
DISSOLVED VBN
ASPIRATIONS NNS
INFERRED VBN
WITHERING VBG
INTOLERABLE JJ
THAT IN WDT DT RB VBP NN
DARMAN NNP
THAW NN
FLAT-FOOTED RB
WINE-MAKING NN
KYU NNP
COUNTERESPIONAGE NN
NOUVEAUX NNP
DISSOLVES VBZ
WAMRE NNP
ILL-FITTING JJ
NICELY RB
AUTOMATED VBN JJ NNP
INTOLERABLY RB
BANK-LOOTING JJ
TIGRS NNP
TILLER NN
CONTRIBUED VBD
TSURUO NNP
AUTOMATES VBZ
OUTRIGHT JJ RB
BETHFORGE NNP
DISTRACTIONS NNS
ARNOTT NNP
PREJUDICE NN
BULLETS NNS
STILL-TO-BE-NAMED JJ
MATTER-OF-FACTLY RB
NONVIRULENT JJ
95-37 CD
SEPTEMBER NNP
INDOMITABLE JJ
NISSAN NNP NN
CHERRY-FLAVORED JJ
RECORDINGS NNS
PAROXYSMAL JJ
REAL-LIFE JJ
METRUH NNP
LOCALIZED JJ VBN
SCOTLAND NNP
ANTARCTICA NNP
NYSE NNP
INSUBSTANTIAL JJ
PATMAN NNP
WHEELBASES NNS
TORCHED VBD VBN
LAGUARDIA NNP
BANGS VBZ
HELICOPTER NN
GENERALIZATIONS NNS
LIAISON NN NNP
NEWSPAPER NN NNP
GRANTOR NNP
MONEY-LAUNDERING NN
TIGUE NNP
MERIEUX NNP NN
SKEPTICAL JJ
EXAMINING VBG
DOVER NNP
RISEN VBN
SHOWGIRLS NNS
LAURIE NNP
PASS-THROUGH JJ
RISES VBZ NNS
JOINTLY RB
HUNTERS NNS
CENTENARY JJ
AWAY-FROM-HOME JJ
ALLOWANCES NNS
MANPOWER NNP NN
WELL-SERVICING JJ
LAND-BASED JJ
JESTER NN
THEVENOT NNP
THEM PRP DT
THEN RB JJ IN
PENCHANT NN
73-YEAR-OLD JJ
DIEGO-BASED JJ
THEY PRP
SUNDOME NNP
POTHIER NNP
PROFFERED VBD VBN
MARKDOWN NN
SCHLUMBERGER NNP
WAGNER NNP
MERCANTILE NNP
STRAFE VB
AUTOMATIC JJ NNP
IMPROVEMENTS NNS NNP
JAILED VBN VBD JJ
CRADLE NN
FITZWILLIAM NNP
CATERING NN VBG
FLAMINGO NNP
HILLSIDE NN
BROKERED JJ VBD
44.125 CD
WHIPPED VBN
PENNANT NN
YOUTH NN NNP
51,911,566 CD
INTECH NNP
TRISKAIDEKAPHOBIA NN
OSHKOSH NNP
VOGELSTEIN NNP
BA-2 JJ
BA-3 JJ NN CD
MACHIKIN FW
SIMON NNP
ONDAATJE NNP
MERRITT NNP
CONTROL-ROOM NN
S-CARGO NNP
PLANT-MODERNIZATION JJ
VALUE-ASSESSMENT NN
INDUSTRY-SUPPORTED JJ
CHRIS NNP
JOACHIM NNP
BORROWED VBN VBD JJ
WIFE\/MOTHER NN
2,720,675 CD
RECEIVED VBD VBN JJ
COST-CONTROL JJ
CROWNTUFT NNP
BANKS NNS NNP NNPS
MAKER NN
MAKES VBZ NNS
BORROWER NN
RECEIVER NN
RECEIVES VBZ
STATUE NN NNP
TITHING NN
PRE-MARKET JJ
CONSTRUCTION-RELATED JJ
XR4TI NNP
CEREBRAL JJ
STEINBERG NNP
STATUS NN FW
CEASED VBD VBN
FALCONS NNPS
CHEKHOV NNP
PASSIVE-LOSS JJ
PRE-GAME JJ
EXCEED VB VBP
CONSTRUCTIVELY RB
INSTRUCTIONAL JJ
FIBERGLAS NNP
ROSENTHAL NNP
STRAIN NN VB VBP
ORNAMENTAL JJ
BRUNSWIG NNP
INEQUITABLE JJ
THIN JJ RB NNP
UNDERGO VB VBP
CEASES VBZ
WELLESLEY NNP
MUCH-LARGER JJ
STRAIT NNP
MASAAKI NNP
THIS DT NNP NN RB
CONFERENCE NN NNP
ONE-BY-ONE JJ
ENERGY-INDUSTRY NN
UNLINKED JJ
LA. NNP
INFLATING VBG
FELDSTEIN NNP
CLIMATE NN
693.4 CD
INDICATED VBD VBN JJ
DISTRICT NN NNP JJ
BANSHEES NNS
VISIONQUEST NNP
IDEALIZED JJ
LAB NN
ALFRESCO RB
LAC NNP
LAD NN
PRODUCE VB VBP NN
INDICATES VBZ
NISSHO NNP
30-STOCK JJ
LAG NN VB VBP
WEBER NNP
38-YEAR-OLD JJ
450,000 CD
GRESSETTE NNP
JUNK-HOLDERS NNS
LAI NNP
LAL NNP
BUDGET-RECONCILIATION JJ
LAP NN VBP
PETROCORP NNP
57-MONTH JJ
EXCALIBUR NNP
LAS NNP
PRODUCT NN NNP
CROSS-SHAREHOLDINGS NNS
INFLATION NN
LAW NN NNP
LAX JJ
LAY VB VBD VBP
TAILORING VBG
CROISSANTS NNS
RAIL-CAR NN
RISKS NNS VBZ
1721.4 CD
19.125 CD
SCHOLARLY JJ
RISKY JJ
STAPHYLOCOCCUS NN
BRONSTON NNP
TOPPLED VBD VBN
17\/32 CD
ANSWERED VBN VBD
VERBATIM JJ RB
ENGAGEMENT NN
LANDOVER NNP
LBO NNP NN
GIBBONS NNP
839.4 CD
BRANCA NNP
WAD-WORKING NN
ACCRUING VBG
SPRAYING VBG
BRANCH NN VB NNP
RESALES NNS
PRESCHOOL JJ
MAKIN NNP VBG
PLAINTIVELY RB
MICROCHANNEL JJ
FINANCIAL-CRIMES NNS
7,500 CD
WAIVERS NNS
CHEMPLUS NNP
EXTRA JJ
CAPTURING VBG
PICKENS NNP
NONINSTITUTIONALIZED JJ
STEAMSHIP NNP
PONTIAC NNP
LDC NNP
SIEMENS NNP
GRGICH NNP
NON-CONVERTIBLE JJ
KNOCK VB NN
280,000 CD
LDI NNP
BRANDS NNS NNP NNPS VBZ
QUARREL VB
15-CENTIMETER-TALL JJ
UNLOCKS VBZ
BRANDY NN
ADVOCATING VBG
LDP NNP
PEACEMAKERS NNS
VALIDATING VBG
PRO-REPUBLICAN JJ
STRAND NNP
FETCHINGLY RB
OHIRA NNP
BIEDERMANN NNP
LED VBN VBD
LEE NNP
LAPHROAIG NNP
LEG NN
TEAMSTERS NNPS
LAUNCHING VBG NN
FORERUNNERS NNS
STOCKHOLDINGS NNS
AGNELLI NNP
RUGGED JJ
MISSILE-LAUNCH JJ
IMPEDIMENTS NNS NNP
LEN NNP NN
LEO NNP
MID-1979 NN
O'KICKI NNP
AUVIL NNP
LEP NNP
COMBUSTION NNP NN
WIDGET NN
LES NNP FW
CONNER NNP
LET VB VBD VBP VBN NNP
LEU NNP
TURNING VBG NN
JASMINE NN
LEW NNP
CLARIFICATIONS NNS
EXPLOITERS NNS
DECLARE VB VBP
BIDDING NN VBG JJ
UNVEIL VB
425,000 CD
L'OEIL FW
COMPULSIONS NNS
FOUR-FOR-ONE RB
MID-1987 NN
MID-1988 CD
TESTA NNP
SYMBOLIC JJ
WELL-TO-DO JJ
TERREE NNP
CONSCRIPTS NNS
679.5 CD
OBJECTS NNS
EVAN NNP
CAUSTIC JJ
ROUGHED VBD
ALUMINIUM NNP
TESTS NNS VBZ NNP
ULTRA-SAFE JJ
M&A NNP NN
FIVE-AND-DIME NN
CHEMICAL NNP NN JJ
MID-1990 NN
EMPHASIS NN
MID-1991 NN
M\*A\*S\*H NNP
ROUGHER JJR
MID-1992 NN
425.4 CD
MID-1995 NN
CLOUDED JJ VBN
BOND-PRICE JJ
EXPECTING VBG
MEMORANDUMS NNS
JALAPENO JJ
SUNBURN NN
PICKERS NNS
JUDGMENTS NNS
WAGE-FLOOR JJ
COMMENSURATE JJ
HIGH-INTEREST-RATE JJ
SILVER NN JJ NNP
NGUYEN NNP
FIVE-STORY JJ
ELECTRICAL JJ NNP
CONTRIBUTE VB VBP
ORGANIZED-CRIME NN
LEERY JJ
MAGELLAN NNP
INTEND VB VBP
FIELDING NN VBG
RESPECTABILITY NN
POUND-DM JJ
MARLENE NNP
GOLFING NN
599.1 CD
POLLSTERS NNS
BULGARIANS NNPS
599.4 CD
ONE-HOUR JJ
599.9 CD
DEMANDED VBD VBN
INTENT NN JJ
HOMEOWNER NN NNP
DYNAMICALLY RB
LID NN
FOREVER RB
LIE VB VBP NN
CONNIE NNP
PLAINTIFF NN
BIA-COR NNP
AERONAUTICS NNP
345.5 CD
LUCINDA NNP
CROSS-CONNECT JJ
HELLMAN NNP
COPYRIGHTED VBN
LIN NNP
LIP JJ NN
LIT NNP VBD VBN
KURLAK NNP
LIU NNP
60-SECOND JJ
LIZ NNP
SHIFTS NNS VBZ
ERUPTION NN
PRE-BANKRUPTCY NN
APPRECIATING VBG
AGREED-UPON JJ
PROPERTY-CASUALTY JJ NN
ASARCO NNP
SUSTAINS VBZ
44,796 CD
PASSENGERS NNS
UNDERWITERS NNS
CONNECTS VBZ
LJH NNP
HASBRO NNP
CONGREGATION NN
KENNAMETAL NNP
UNIVERSITY NNP NN
LJN NNP
ARABS NNPS NNS
FEATURE NN VB VBP
SPRINKLERS NNS
SLENDER JJ
EVEN RB JJ VB RB|JJ
NEGLIGIBLE JJ
80-YEAR-OLD JJ
EVER RB
ROBES NNS
TEST-TUBE NN
INDICATOR NN
BOGNER NNP
APPRECIATION NN
DOUBLED VBD VBN
MUSTER VB NN
7,580 CD
AMERICAN NNP JJ NN
DOWNHILL RB
AMERICAS NNPS NNP
NEGLIGIBLY RB
MARCATO FW
UNINSURABLE JJ
EXCEPT IN VB
WANDA NNP
BECCA NNP
DOUBLES VBZ NNP
PROPPING VBG
FULL-TIME JJ RB
ITALIAN-AMERICAN JJ
COUNTERSUED VBD VBN
STRAUB NNP
SILVIO NNP
THUG NN
OHBAYASHI NNP
MAKRO NNP
58-A-SHARE JJ
UNRESTRICTED JJ
HINGHAM NNP
THUN NNP
STRAUS NNP
17-STORE JJ
BROKERAGE-HOUSE NN
THUS RB
REFLEX JJ
PENETRATED VBN
WANED VBD VBN
UNMASK VB
REVERSE-ENGINEERING NN
DOXEPIN NN
WATERWORKS NN NN|NNS
CHAOTIC JJ
POPPING VBG
185.1 CD
WANES VBZ
LME NNP
VARIABLE-RATE JJ
GOLDSTAR NNP
185.5 CD
DISORDERLY JJ
CREDIT-DATA NN|NNS
185.7 CD
23-MONTH-OLD JJ
ELSEWHERE RB NN NNP
MAINLAND JJ NN
185.9 CD
PRINCIPALLY RB
THEME-PARK NN
NEGLIGENCE NN
NIGHTWATCH NNP
SHAW-CRIER NNP
TEST-FIRED VBN
KLUGE NNP
MATHEWS NNP
VASSALS NNS
COURAGEOUS JJ
TONNAGES NNS
ERRONEOUS JJ
CONSPIRACIES NNS
REDRAW VB
CLARCOR NNP
DESERVING JJ
CARTRIDGES NNS
SUPER-FAST JJ
ROUGHLY RB
TURF-HUNGRY JJ
EXCESS JJ NN
UNIMIN NNP
EVIL JJ NN NNP
ROBIE NNP
APPEALING VBG JJ
156,000-SQUARE-YARD JJ
BIOVENTURES NNP
GASEOUS JJ
ROOMMATES NNS
MONMOUTH NNP
GRANNIES NNPS
ROBIN NNP
PARSOW NNP
HANNIBAL NNP
SHORT-DATED JJ
RATIONALLY RB
M.D NNP
WONDROUS JJ
LOG VB VBP NN
ATTENDANT NN JJ
PLANNERS NNS NNP NNPS
4.01 CD
CANCELING VBG
4.03 CD
MARQUEZ NNP
ENVIABLE JJ
4.04 CD
LOK NNP
4.05 CD
4.06 CD
REOPEN VB
ANTI-PARTY JJ
4.07 CD
PRODUCT-TESTING NN
HIBBARD NNP
LOS NNP
LOT NN RB NNP
LOU NNP
VIETNAMESE JJ NNS NNP
LEEZA NNP
LOW JJ NN RB NNP
45-YEAR-OLD JJ
RECKONS VBZ
MCGRAW-HILL NNP
STOP-CLOSE-ONLY JJ
UNCLASSIFIED JJ
ENVIABLY RB
LANIER NNP
FERNAND NNP
SITUATION NN
SCORED VBD VBN
COLLEGE-BOUND JJ
1850S NNS
4.10 CD
4.11 CD
COUNTERSUIT NN
4.12 CD
4.13 CD
4.14 CD
4.15 CD
SEMI-RETIRED JJ
4.17 CD
4.19 CD
MACARI NNP
GRANDMOTHERS NNS
WILLARD NNP
SCORES NNS NNPS
GALLERY NN NNP
MAINFRAME-CLASS JJ
2189.3 CD
DOLL-SIZED JJ
ARTIFICIAL JJ NN
BRITANNIA NNP
2189.7 CD
DECLINERS NNS
SWINDLED VBN
TERROR NN
KNOPF NNP
STUMBLED VBD VBN
FOREST-PRODUCT NN
PRESENT JJ VB NN RB VBP
ADMITS VBZ NNS
LOW-TECH JJ
DRAGGING VBG
4.20 CD
4.22 CD
4.23 CD
RESOURCE NNP NN
DETENTE NN
4.25 CD
4.26 CD
4.27 CD
TENNECO NNP
MOLIERE NNP
FALLEN VBN JJ
GRIDDED JJ
FEDERAL JJ NNP
SELKIRK NNP
SEASONAL JJ NNP
BAA2 JJ
BILINGUAL JJ
BAA3 JJ
BURRILLVILLE NNP
MASSIVE JJ
HILGER NNP
LLOSA NNP
DUELS NNS
ROLL-OUT NN
RAIDING NN VBG
ISSUING VBG NN
LACKED VBD VBN
4.31 CD
4.32 CD
4.35 CD
DESIRABLE JJ
4.38 CD
CHAUFFEUR-DRIVEN JJ
4.39 CD
INTEREST NN NNP VB
CLIMBED VBD VBN
SINCE IN RB
LACKEY NNP
HOME-DELIVERY NN
BARE-FACED NNP
PRO-ABORTION JJ
MIDSIZED-CAR NN
BLITZES NNS
UNSUSTAINABLE JJ
DILIGENCE NN
MERCEDES-BENZ NNP
24.1 CD
MEDIUM-TERM JJ
24.2 CD
4.40 CD
24.3 CD
4.41 CD
SONGSTERS NNS
24.4 CD
BUZZELL NNP
LSI NNP
24.5 CD
24.6 CD
BABE NNP
IRONS NNS
24.7 CD
4.45 CD
24.8 CD
4.46 CD
24.9 CD
4.47 CD
CAPITALIST-EXPLOITERS-GREEDY-AMERICAN-CONSUMERS-GLOBAL JJ
4.48 CD
LT. NNP
4.49 CD
EXECUTIVE-MODEL JJ
IRONY NN
MUCH-HERALDED JJ
FORBADE VBD
47%-CONTROLLED CD
JUSTICE NNP NN JJ
LSX NNP
TINGED VBN
SUGGESTIONS NNS
UNDERPAID JJ
SHERRY NNP
HIGH-SPEED JJ
BABY NN NNP
TEXACO NNP
62,000 CD
LTD NNP
4.50 CD
CIRCULARS NNS
4.51 CD
4.52 CD
TINGES NNS
4.54 CD
4.55 CD
4.56 CD
BACH NNP NN
SHIVERING VBG
4.58 CD
4.59 CD
BACK RB RP NN JJ VB VBP NNP
HEAT-USING JJ
LTV NNP
WONDERBARS NNS
TEMPORARILY RB
ONE-ON-ONE JJ
HIGH-CAPACITY JJ
STOCK-APPRECIATION-BASED JJ
NORRIS NNP
AGENCIES NNS NNPS
TRASHING NN VBG
ROBOT NN
2400 CD
FREE-SPENDING JJ
DODGERS NNP NNPS
PRIOR-YEAR JJ
4.63 CD
RAILWAYS NNS
4.65 CD
CONSOLIDATING VBG
4.66 CD
KNOTS NNS
WONDER VBP NN VB NNP
4.67 CD
COLTON NNP
4.68 CD
SEASONED JJ
WANNA NNP
DRUG-SALES NNS
CAISSE NNP
FOLDABLE JJ
LUX FW
LUZ NNP
CIRCULATE VBP VB
KEAN NNP
VEGANS NNPS
SPIEGELMAN NNP
BONFIRE NN NNP
U.S.-DOMINATED JJ
2410 CD
WELL-HEELED JJ
4.70 CD
TOPICAL JJ
OUTLOOK NN
4.74 CD
4.75 CD
ASHTRAYS NNS
4.76 CD
75,075,000 CD
LIGHTFOOT NNP
MACMILLAN\/MCGRAW-HILL NNP
OLIVER NNP
MARGARET NNP
PREDATORS NNS
EMBELLISH VB
ROLODEXES NNPS
CONSOLIDATION NN
INSURANCE-RELATED JJ
WATER-AUTHORITY NN
SINGH NNP
NEWSROOM NN
BAER NNP
EXUDE VBP
STAYING VBG NN
SINGS VBZ
WARMAN NNP
IMPROVED VBN JJ VBD
YASUDA NNP
THRALL NN NNP
INTENTIONALLY RB
ANTI-POCKETBOOK JJ
4.80 CD
SCHRAMM NNP
4.81 CD
4.82 CD
SENATE-PASSED JJ
4.83 CD
EDSEL NNP
JUSTIFY VB
SEVERAL-YEAR JJ
GIANCARLO NNP
FEEL-GOOD JJ
4.88 CD
IMPROVES VBZ
KECK NNP
ALCARRIA NNP
EQUALED VBD VBN
INTERGRATED-STEEL NN
NORMENT NNP
LLOYD NNP NN
95.09 CD
PARANOIA NN
4.90 CD
ENQUIRER NNP
UNINTENTIONALLY RB
POLISHING NN VBG|NN
4.92 CD
KNOWN VBN JJ
PARANOID JJ
NON-ENFORCEMENT JJ
4.93 CD
STUBBORN JJ
4.95 CD
EDITORIALS NNS
CUP-TOTE NNP
KNOWS VBZ
4.97 CD
AD-FREE JJ
4.99 CD
BLOCKED VBN VBD
STABILITY NN
PRANDINI NNP
PONCE NNP
L'HEUREUX NNP
BAGS NNS
SHOCKPROOF JJ
FUTURES-EXCHANGE NN
95.11 CD
NON-JAPANESE JJ
CUMULATIVE JJ
AFFLICTION NN
DINGELL NNP
'60S NNS CD
BLOCKER NN
37,000 CD
100-POINT JJ
OSWALD NNP
ARSENIDE NN
PLAINTIVE JJ
2445 CD
MASONS NNS
369.10 CD
SOUNDED VBD VBN
SIGNATURE NN
LYN NNP
PRICE\/EARNINGS NNS
GALLERIES NNS
LYS NNP
BLUDGEONED VBN
ARRANGING VBG
NEST-EGG NN
HIGH-PURITY NN
CROSS-MARKET JJ
CHEAP-TO-MAKE JJ
PRESTIGIOUS JJ
95.22 CD
GUARANTEED VBN JJ VBD
KEEL NN
KEEN JJ VB
95.25 CD
GRAYSON NNP
PONDS NNS
900-INTERACTIVE JJ
DELETERIOUS JJ
STEVENSON NNP
KEEP VB VBP
FRANCAIS NNP
INJURIES NNS
DUBININ NNP
MCINERNEY NNP
2450 CD
DECISION NN
GUARANTEES NNS VBZ
DISPOSALS NNS
10-MONTH JJ
FLAKES NNPS NNP
BAIL VB NN
BAIM NNP
WEALTHIEST JJS
BAIN NNP
WHITE-HAIRED JJ
JOINT-RESEARCH JJ
WARMED VBN VBD
INSTALLED VBN VBD JJ
BAIT NN
992,000 CD
KANSAS NNP
95.33 CD
TIME-LIMITED JJ
KLUTE NNP
95.39 CD
DRAMATIZATIONS NNS
GOLDSTON NNP
TICK VB NN
EXAMINED VBD VBN
PTY. NNP
SALE-PURCHASE NN
WARMER JJR
BAJA NNP NN
WAGGISHLY RB
PUBLIC-ADDRESS JJ
LIGHT-CRUDE NN
35107.56 CD
EXAMINER NN NNP
EXAMINES VBZ
CAPITALISTIC JJ
HERMAN NNP
FALLON NNP
HOMELESS JJ NN NNP
79.03 CD
TIPASA NNP
BEER-BELLY NN
LANDSCAPING NN
MOTTRAM NNP
87.25 CD
FALLOW JJ
934.7 CD
TIDE NN NNP
DOWDY JJ
WANTS VBZ
MACHINE-GUN-TOTING JJ
BANQUET NN
HEMISPHERIC JJ NNP
OVERPRICED VBN JJ
IKEGAI-GOSS NNP
STREAMLINE VB
8,000 CD
ROSENBACH NNP
377.60 CD
INGENIOUSLY RB
DREXLER NNP
TIDY JJ
JOINT-VENTURE NN JJ
CONCENTRATED VBN JJ VBD
GET-RICH-QUICK JJ
ANTI-NORIEGA JJ
FLOATED VBD VBN
ASPECT NN
BACK-UP NN JJ
JELL-O NNP
95.53 CD
TIED VBN VBD
RITES NNS
79.18 CD
95.57 CD
CONCENTRATES VBZ
BRAVING VBG
DECADES NNS
WAGE-DISCRIMINATION NN
INCIDENT NN
DARNED RB
BALA NNP
WATCHMAN NN
BALD JJ
TIES NNS VBZ NNPS
CONVICT VB NNP
POLICIES NNS
BALI NNP
BRECHT NNP
1,475,000 CD
NON-AMT JJ
BALK VB VBP
BALL NN NNP
RIVALING VBG
BALM NN
PERSISTS VBZ
WAYWARD JJ
WOUNDS NNS
TRILLIONS NNS
SWEETNESS NN
BURNOUTS NNS
PARIBAS NNP NNS
BOLSTERED VBN VBD
UNDERSTAFFS VBZ
WHIMSICALLY RB
WHOOOSH JJ
STABILIZE VB VBP
KEIO NNP
TIFF NN
THRASH VB
TRAYNOR NNP
S.A. NNP
52-YEAR-OLD JJ
INHABITS VBZ
377.80 CD
UNIONFED NNP
EARLIEST JJS RBS
OCCASIONAL JJ
LUXURY-CAR NN
HICCUP NN
LARGE-DENOMINATION NN
EQUIPPED VBN VBD JJ
SOVIET-GERMAN NNP
DIZZINESS NN
95.72 CD
ROAD NN NNP
95.75 CD
87.57 CD
JEWISH JJ NNP
QUADRUPLING NN VBG
PATRICIA NNP
CAIRO NNP NN
ROAM VBP
QUIXOTE NNP
IMAGINATION NN
TEXANS NNPS
50.1%-OWNED JJ
ROAR NN
BANC NNP
BAND NN NNP VB
BANE NN
SMALL-FRY JJ
1.9375 CD
BANG NN NNP VB
WOODCHUCKS NNS
ENFORCING VBG
SYDNEY NNP
BANK NN NNP VB VBP
EQUALLY RB
MALEC NNP
MUNDO NNP
BANS NNS VBZ
ROBB NNP
SUSTAIN VB
IKEN NNP
ROBE NN
MALEK NNP
KNOCKOUT NN
FINANCIAL-REPORT JJ
QUEENSLAND NNP
CORNING NNP
S.C. NNP
MALES NNS NNPS
NEWSWORTHINESS NN
BEAMING JJ VBG
SIRENS NNS
COPIED VBN VBD
HARWOOD NNP
BEHEADING NN VBG
DOWIE NNP
SINCERITY NN
COPIER NN
COPIES NNS
RIGIDITY NN
95.90 CD
KELP NN
DECISIVE JJ
BLUE-CHIPS NNS
UNSETTLING JJ
CEILINGS NNS
ROCK NNP NN VB
SWIFTLY RB
ARIAIL NNP
NOVITIATE NN
DECADE-LONG JJ
FELDENE NNP
MULTI-GEAR JJ
WATCHMEN NNP
YACHT NN NNP
EMISSIONS NNS
125-BILLION-A-YEAR JJ
RAINSTORM NN
PURCHASERS NNS
SOON-TO-BE-SOLD JJ
VOYLES NNP
SNOOPY NNP
RODE VBD
ELECTRIC-UTILITY JJ NN
KEMP NNP
FACELIFTS NNS
HIGH-TECH JJ NN
MAC NNP
NERD-AND-GEEK JJ
MAD JJ NNP
MAE NNP
AGGRAVATED VBN VBD
RODS NNS
SHIPBUILDER NN
ADAMANTLY RB
WARMLY RB
MAN NN NNP VB UH
ASHEVILLE NNP
MAO NNP
MAP NN VB VBP
80%-PLUS JJ
MAR NNP
MINNIE NNP
STEADFASTLY RB
AGGRAVATES VBZ
INJURING VBG
MAX NNP
MAY MD NNP
ZHAOXING NNP
TICKING VBG
PRIORITIES NNS
AZIONI NNP
VISITING VBG
ILLUMINATING NNP JJ
ACCCOUNTING NN
MBA NNP
MBB NNP
NIGHTMARES NNS
17-YEAR-OLD JJ
KENT NNP
361,000 CD
INCREMENTALLY RB
PATCHED JJ VBN
BARD NNP
MULTI-CRYSTAL JJ
BARE JJ
RESELLER JJR JJ NN
STRIPPING VBG
BARN NN NNP
BURBANK NNP
UTILITARIAN JJ
BARR NNP
BARS NNS VBZ
BART NNP
HARTNETT NNP
REALIGNED VBD
U-TURN NN
TILE NN
CONCERNED VBN JJ VBD NNP
MCA NNP
UNRUH NNP
RETHINKING VBG
COMPUTER-SYSTEMS NNS
NOZZLES NNS
TILL IN
S.G. NNP
360.1 CD
7,600 CD
KANSKA NNP
MCI NNP
THIRD-LARGEST JJ
BASE NN JJ NNP VB VBP
BASF NNP
TILT VB NN
PROPAGANDA NN
BASH VB NN
VCRS NNS
FLATOUT NN
MD. NNP
CONOCO NNP
MILESTONES NNS
RESPIRATORY JJ
BASS NNP NN
ERRATIC JJ
MUNIS NNS
BELZBERG NNP
RESTARTERS NNS
TIME NN NNP VB
EXPERIMENTALLY RB
MUNIZ NNP
PROSPERED VBN
KEPT VBD VBN
COPIERS NNS
CORNISH NNP
BUSINESS-JUDGMENT NN
PATRICOF NNP
LESIONS NNS
BATH NN
PARTED VBD
142-PAGE JJ
PREPURCHASE JJ
EMBARRASSED JJ VBN VBD
BATS NNS
DOWNS NNS
SNOOTY JJ
SECURELY RB
TINA NNP
ENCRUSTED VBN
IMAGINATIVE JJ
THEIRS PRP JJ
LUCKIER JJR
ARIANE NNP
SWAMPED VBN VBD
TING NNP
MEA NNP
STYLED VBN
POLICING VBG
ROHM NNP
S.I. NNP
PUBS NNS
ROHS NNP
QUERECHO NNP
280.5 CD
TINS NNS
7.081 CD
MEL NNP
FIRING NN VBG
280.7 CD
POLITBURO NNP
MEN NNS NNP NN NNPS
1,103.11 CD
STYLES NNS
PLANT-AND-EQUIPMENT JJ
TINY JJ NNP
OUTGROWN VBN
BAUM NNP
MET VBD VBN NNP
HEAVY-HANDEDNESS NN
WAGONS NNS
KERN NNP
SEDUCING VBG
KERR NNP
ROIL VB
MALLS NNS
GAUGES VBZ
CHASING VBG NN
RWANDA NNP
RATEPAYERS NNS
SEMMEL NNP
MOTHER-IN-LAW NN
COWBOYS NNPS NNS NNP
ASPENS NNS
MEANINGFULLY RB
IMPLEMENT VB
CONTINUAL JJ
DARMAN'S NNP
NEKOOSA NNP NN
246.60 CD
CONVERTS VBZ NNS
IL-4 NN
DAVIDSON NNP
CLOSE-MOUTHED JJ
POTABLES NNS
SHUGART NNP
BIRMINGHAM NNP
YACOS NNP
EAGLE-BEROL NNP
TIPS NNS NNP
MACHINERY NN NNP
6.625 CD
MGM NNP
GLIMPSES NNS
MONOPOLIES NNS NNP NNPS
SOVIETIZED JJ
ABRIDGING VBG
DELEAGE NNP
TEST-PREPARATION JJ
ACORN NNP
AWAITING VBG
NATURALIZATION NNP
URGED VBD VBN
SOMOZA NNP
44,877 CD
COMPUTERIZED JJ VBN NN
CONSPIRING VBG
ALSON NNP
COPING VBG
131.01 CD
PISTOL-PACKING JJ
URGES VBZ
131.04 CD
N'T RB
KODANSHA NNP
BENIGHTED JJ
FOURNIER NNP
LARGE JJ RB
LYRICISM NN
STIRLING NNP
PUFF NN
ROLE NN
WARMTH NN
LYRICIST NN
ROLF NNP
TIRE NN NNP
WHACKED VBD VBN
SHEINBERG NNP
WHIPPINGS NNS
EXTRACTING VBG
WITTGREEN NNP
ROLL NN VB VBP NNP
18.819 CD
PAINTING NN VBG
ROLM NNP
MID JJ NNP
VENTURES NNS NNPS NNP
BUSIEST JJS
DEMAGOGIC JJ
LUDWIGSHAFEN NNP
EWDB NNP
INVESTIGATE VB
ONCE-SACRED JJ
WHACKER NN
COD-LIVER NN
PEPPERIDGE NNP
OUTWARD-LOOKING JJ
LIBERALIZED VBN VBD
GRIEVANCES NNS NNP
COMPANIA NNP
MIT NNP
MORNING-SESSION NN
PROSECUTORIAL JJ
MEDIUM-SIZED JJ
MIX NN NNP VB
CONCENTRATING VBG
BAYS NNS
KELLI NNP
PROBLEMATIC JJ
ROME NNP
43.875 CD
PREPOSTEROUS JJ
HARVESTING NN
WARMUP NN
MCMASTER NNP
VAGUELY RB
ROMP VBP
DELIVERS VBZ
SALTZBURG NNP
FACIAL JJ
INCARCERATE VB
EXTRACTION NN
TACONIC NNP
KELLY NNP
POWERLESS JJ
DELIVERY NN
LEFTY NNP
RESELL VB VBP JJ
MONARCH NNP
ALUMINUM NN NNP JJ
CONTINUED VBD VBN JJ
MUSHROOMS NNS
FUZZIER JJR
HIRAM NNP
EMYANITOFF NNP
IRRESPECTIVE RB
AUDITING NN VBG
POWER-HUNGRY JJ
CONCENTRATION NN
DOWTY NNP
CONTINUES VBZ
BALLOONS NNS VBZ
ENIMONT NNP
SIMILAR-SIZED JJ
INTEREST-ONLY JJ
266.2 CD
LEONEL NNP
TITO NNP
299,000 CD
266.5 CD
EGYPTIAN JJ NNP
NOBELS NNPS
BEHAVING VBG
PREDOMINANTLY RB
131.34 CD
NOVAMETRIX NNP
FIXED-PRICE JJ
MCNALLY NNP RB
NON-VIRULENT JJ
TENUOUS JJ
AKERSON NNP
ROOF NN NNP
ROOK NN
HAILING VBG
PARTLY RB
ROOM NN
AUDITION VB NN
DANZIG NNP
S.P. NNP
SILBERBERG NNP
ROOT NN VB VBP
CORRECTS VBZ
WARFARE NN
ASSERTIONS NNS
TELEGRAAF NNP
BEHAVIOR NN
RESENT VBP VB
MLX NNP
POPEYE NNP
OVERRULE VB
ELEVATORS NNS
ROPE NN
MASSAGING VBG
KEYS NNS
PREMIERED VBD
186.1 CD
FOLEY NNP
HOLIDAY-SEASON JJ
CURATOR NN
186.4 CD
MMG NNP
HINDERED VBD VBN
MMI NNP
CONTAINER-SHIP NN
ALL-CASH JJ
ARBEL NNP
DIPLOMATIC JJ
IMMORALITY NN
PREMIERES NNS
ROSENBAUM NNP
ANTI-DUMPING JJ
ROCHA NNP
MMS NNP
HARSHNESS NN
MALTA NNP
PENSION-INSURANCE JJ
ROCHE NNP
ARREST NN VB
INTERFACE NNP
MILTON NNP
PHRASES NNS
TERRIFIC JJ
BULLET-PROOF JJ
MNB NNP
SKIDS NNS
MNC NNP
BLIND-SIDED JJ
OFFSIDE NN
HOLLINGS NNP
PACKAGE-SORT JJ
INSISTED VBD VBN
CALCULATING VBG
MODIFY VB
107.03 CD
MO. NNP
MEASURING VBG NN
HIRED VBN VBD
131.64 CD
CARRIER-BASED JJ
FLOATING VBG JJ
ZLOTYS NNS
MALUF NNP
SENSIBILITIES NNS
MAHRAN NNP
HIRES VBZ NNS
18.875 CD
LEONID NNP
PULL VB VBP NN
SKIER NN
MARKET-JARRING JJ
MOB NN NNP
SKIES NNS NNPS
N.C NNP
CANDIDACY NN
N.D NNP
PULP NN NNP
S.S. NNP
OVERRUNS NNS
N.H NNP
TONGUES NNS
MOI FW
N.J NNP
PRIVILEGE NN
DISGORGEMENT NN
SYMPOSIUMS NNS
RETRACTABLE JJ
N.M NNP
MOM NN
MULTIPLE-YEAR JJ
DRASTIC JJ RB
MOP VB
RORY NNP
LET'S-GIVE-IT-A-YEAR JJ
CALCULATION NN
LARGELY RB
N.V NNP NN
MOW VB
ROSA NNP
PEPCID NNP
N.Y NNP
SMOLDER VBP
WHOOPEE NN UH
ROSE VBD NNP NN VBP
PRECIPITATED VBD
FREEING VBG NN
MPD NNP
PUMP VB NN VBP NNP
WHOOPER NN
MPH NN JJ
LAST-PLACE JJ
MPI NNP
WASTEWATER NN NNP
ROSS NNP
ROST NNP
HYPOCRITES NNS
PREARRANGED VBN
ROSY JJ
HERBICIDES NNS
TSE-TUNG NNP
PROJECT NN NNP VB VBP
ROTC NNP
FOLIO NN
ROTE JJ
FRINGE NN
ROTH NNP
10,000 CD
PUNK NN
VAGUEST JJS
HARASSING VBG
STANLEY NNP
HIGH-PROFIT JJ
10,004 CD
ROCKS NNS
RITZY JJ
PUNS NNS
PUNT NN
ROCKY JJ NNP
PANZHIHUA NNP
35678.49 CD
GROWERS NNS
TRADEOFF NN
PUNY JJ
BIOGRAPHER\/CRITIC NN
MR. NNP NN
ENDEAVORING VBG
HARD-LINE JJ
MASERATI NNP
NON-USER NN
DIDION NNP
DICTATE VB VBP
WHOLLY RB
MRA NNP
BIAGGI NNP
YUGOSLAVIA NNP
INSULATE VB VBP
MRI NNP
ROUT NN
METTLE NN
THIRD-QUARTER JJ NN
MS. NNP
NOW-EVIDENT JJ
PRICECUTTING NN
MRS NNP
FOLKS NNS
12-MINUTE JJ
20-CLASS JJ
FREEMARKET JJ
25.1 CD
25.2 CD
25.3 CD
25.4 CD
25.5 CD
GRAPPLE VB
25.6 CD
107.50 CD
COHERENCE NN
25.7 CD
STEROIDS NNS
25.8 CD
COLUMN NN
JELLED VBD
MCENANEY NNP
INQUIRY NN NNP
MONSIEUR NN
DILORENZO NNP
SALINA NNP
AUSTRIA NNP
ROSKIND NNP
PROFICIENCY NN
ROWE NNP
NONRESIDENTIAL JJ
JEAN-PASCAL NNP
EXPORTING NNP VBG
FOLLY NN
APPROPRIATE JJ
BREWERIES NNS NNPS
OPERATING VBG NN NNP
GARBAGE NN NNP
LARRY NNP
VISIONS NNS
ROWS NNS
KWEISI NNP
MTM NNP
PERCENTAGES NNS
SASSER NNP
VITALITY NN
MTV NNP
PURE JJ
DROPPING VBG
WHISTLED VBN
WHOLESALE JJ NN
NOVITIATES NNS
MUD NN
WATHEN NNP
2500 CD
CHEAP-SHOT JJ
MICROCOMPUTER-SYSTEMS JJ
MUM JJ
GOTTEN VBN
OPERATION NN
FREAKISHLY RB
WHISTLES NNS
DECENT JJ
BBDO NNP
HERALDED VBN
PROTESTERS NNS
MICOPROCESSORS NNS
JIBRIL NNP
WHITE-MAJORITY JJ
CAR-CARE JJ
SKILL NN
MORGENZON NNP
PUSH VB NN VBP
DEPOSITED VBD VBN
MARKETING NN VBG NNP JJ
IMPAIRED VBN JJ
NERVE-RACKING JJ
WEEPING VBG
MVL NNP
LARGESS NN
FIVE-GAME JJ
LARGEST JJS
NORSKE NNP
MUSCOVITES NNS
G.M.B NNP
107.87 CD
20%-PLUS JJ
NON-INVASIVE JJ
WORKDAY NN
SKIMP VB
MULTILAYER JJ
FACING VBG
PUTS VBZ NNS NNPS
MK-FERGUSON NNP
ARBOR NNP
PACKAGE-SORTING NN
PUBLIC JJ NN NNP RB
DENSITY NN
FRAMING NN VBG
LEGAL JJ NNP
SKINS NNS
BEIGEL NNP
TAKAYAMA NNP
COFFEEHOUSE NN
JERRY NNP
61.125 CD
BURCH NNP
ANTI-DISCRIMINATION JJ
KREBS NNP
666-1260 CD
POOCH NN
SHALLOW JJ
ROUND-TABLE JJ
VOYAGER NNP
EXPERIMENTING VBG
SUPPLEMENTS NNS
DECIMATED VBN
'70S NNS CD
24TH JJ
COOPERATIVELY RB
ITSELF PRP
LION'S-HEAD NN
EBASCO NNP
UNDERWRITERS NNS , NNP
SIGHED VBD
CONSUMER-CREDIT JJ
INVADE VB VBP
DISPOSABLES NNS
SKOPBANK NNP
ALL-POWERFUL JJ
ANNEX NN NNP
ISLAND NNP NN
BOGOTA NNP
DOLLAR NN NNP
MISCLASSIFIED VBN
TORONTO-BASED JJ NNP
MCGEE NNP
ABOUNDED VBD
ACQUIRING VBG
UNINFORMATIVE JJ
SURREALISM NN
DYNAPERT NNP
REICHMANNS NNP
TEARING VBG
TOCKMAN NNP
395,974 CD
HOPEFUL JJ NN
RECEPTECH NNP
PLAYING VBG NN JJ
24,985,000 CD
LOSERS NNS
LOTTERIES NNS
INJECTING VBG
PROLIFERATE VBP
ORVILLE NNP
DROPED VBD
GENERAL-PRACTITIONER NN
REPLACED VBN VBD
WARNED VBD VBN
ARGUMENT NN
MODISH JJ
NEUTRALIZED VBN
UNDERPRIVILEGED JJ
DOWNDRAFT NN
PEACEFULLY RB
YACHTS NNS
REPLACES VBZ
WARNER NNP
1984-85 CD
MEALS NNS
ADMONITION NN
MANIPULATED VBN
ALTAR NN
NEUTRALIZES VBZ
MEALY JJ
TRUCK-RENTAL JJ
TELEGRAPH NNP VBP NN
PARENTS NNS NNP
PRE-EXISTING JJ
ZEALAND NNP
MARKET-MOVING JJ
MANIPULATES VBZ
INJECTION NN
SHARPENS VBZ
CORRESPONDED VBD
INFLICT VB
U.N.-SPONSORED JJ
MCTOXICS NNP
MONOPOLIZE VB
HOARDING NN VBG
VAULT NN VB NNP
SKIRT NN
MODZELEWSKI NNP
OPERATIVE JJ NN
8,100 CD
BURGE NNP
SLATKIN NNP
AD-SUPPORTED JJ
TWO-YEAR JJ
1990-1995 CD
LONG-YARDAGE JJ
SQUEEZING VBG
VEATCH NNP
TRIAGE NN
HORIZONS NNS NNP
OPERATIONAL JJ
PROPYLENE NN
GULICK NNP
MANUEVERING NN VBG
BURGS NNS
RETURNED VBD VBN
ROOTED VBN JJ
36.125 CD
PAMELA NNP
UTAHANS NNPS
MEANS VBZ NNS NNP NN NNPS
MEANT VBN VBD
CULPA NNP
EXECUTIVE-LEGISLATIVE JJ
SEAHORSE NNP
OVERBURDEN VB
FLOUNDERING VBG
FIFTEENTH NNP
IMAGE NN
19-BUILDING JJ
FRAGMENTS NNS VBZ
EGG-ON-THE-FACE JJ
MIDEAST JJ NNP NN
BIOSOURCE NNP
CHINESE-AMERICAN NNP
INVESTMENT NN NNP JJ
GLOVES NNS
TBILISI NNP
DAIKIN NNP
NICHOLAS NNP NNS
TURNKEY NN
EVELYN NNP
DOLLAR\/MARK JJ
UNDEFEATED JJ
SCHOOLTEACHERS NNS
53%-OWNED JJ
NON-VOLATILE JJ
601.3 CD
CALTRANS NNP NNS
UNCHARTED JJ
TOP-FLIGHT JJ
BILLION-FRANC NN
TRANS-ALASKA NNP
SPEEDWAY NN NNP
POWDERS NNS
CORDIS NNP
MEXICO NNP
BIRTH-CONTROL JJ NN
5\/16 CD
ASHTON-TATE NNP
31-YEAR-OLD JJ
15,845,000 CD
CRAFTON-PREYER NNP
AUTO-BUYING NN
PITCHING VBG NN
CHIAPPA NNP
NINETY CD
MCCURDY NNP
ALTER VB VBP NNP
GRIECO NNP
UNIQUELY RB
CANDIDATE NN
STICKIER JJR
SU-27 NN
POPOLARE NNP
SLAVERY NN
COMPETITOR NN
INVENTORS NNS
INVENTORY NN
BURSTING VBG
SHUTDOWNS NNS
ECONOMIC-EFFICIENCY NN
AMPARANO NNP
FABRICATORS NNS
HOMAGE NN
WIESENTHAL NNP
ANTI-NAUSEA JJ
DONG-A NNP
DATING VBG NNP
521.2 CD
UNIFICATION NNP NN
BURKE NNP
521.4 CD
7.125 CD
PAINTBRUSH NN
REPRIEVE NN
5\/32 CD
LABONTE NNP
MCNEALY NNP
SHARPEST JJS
PUBLISHABLE JJ
NEWS-RELEASE NN
MCCAMMON NNP
147.874 CD
TARIFFS NNS NNP NNPS
MCCORMACK NNP
MANUFACTURING-SECTOR NN
GRATUITOUS JJ
LAID-BACK JJ
EMPATHY NN
FLUNKY NN
PHILIPS NNP
GRAB VB NN VBP NNP
DOWNSIDE NN JJ
POOLE NNP
IN-ROOM JJ
YITZHAK NNP
TENNESSE NNP
GRAM NN
SIMPLE-MINDED JJ
POOLS NNS
GRAS NNP
BURLY JJ
TRIALS NNS
DAMN-THE-TORPEDOES JJ
SALUTED VBD
GOVERNMENT-ASSISTED JJ
NAC NNP
BELLSOUTH NNP
DEFICIENCY NN
GRAY NNP JJ
RADICALLY RB
RESUMPTION NN
441.1 CD
INSTRUMENT NN NNP
SECURITIES-FIRM JJ NN
NAM NNP
575,000 CD
7.145 CD
GALVANIZE VB
NAS NNP
OVERPAY VB
HYPERINFLATION NN
SOMETHIN' NN
ARTIFACT NN
PROVED VBD VBN JJ
NBA NNP
NBC NNP
44.375 CD
COMPLIMENT NN VBP
NBI NNP
PROVEN VBN JJ
MEATS NNS NNPS
STROBEL NNP
JALAALWALIKRAAM NNP
PROVES VBZ
LEAPING VBG
CO-MANAGING JJ VBG
T-1000 NNP
FIENBERG NNP
BOTHER VB VBP
BROUWER NNP
KYODO NNP
SECONDARY JJ
MANAGE VB VBP
ARCH-RIVAL JJ
BURNS NNP NNS VBZ
BURNT JJ VBN
WEDGE NN VB
SUCKER NN
SOMETHING NN
FIERCE JJ
PATOIS NNP
CUTBACKS NNS NNP
CAMILO NNP
HAULAGE NN
272,000 CD
NCI NNP
VEHEMENT JJ
STAGFLATION NN
DISSATISFIED JJ VBN
7.160 CD
DWARFED VBN
361.5 CD
494,100 CD
361.8 CD
LIGHTED VBN JJ
INTONATION NN
THYGERSON NNP
NCR NNP
PARTAKE VB
14,580,000 CD
KRENZ NNP
LIGHTEN VB
AMERADA NNP
SERGEANTS NNS
INTRODUCE VB
LIGHTER JJR
OFFICERS NNS
BLUEPRINT NN
DEBAKEY NNP
NETWARE NNP
MCNAMEE NNP
COUNTERPART NN
SIOUX NNP
ARENAS NNS
BENSONHURST NNP
NON-FINANCIAL JJ
80-POINT JJ
EXHAUST VB VBP NN
TOBIAS NNP
LYING VBG
QUARTER NN
15-YEAR JJ
GREG NNP
QUARTET NN
PREROGATIVE NN
SARDINIA NNP
CERTAINLY RB
ILL. NNP
LOBBIED VBD VBN
GREW VBD VBN
LASZLO NNP
NEC NNP
NED NNP
GREY NNP
MAJOR-LEAGUE JJ
TRUCULENCE NN
PLANTATION NN NNP
COELHO NNP
DUBIOUS JJ
281.2 CD
PUBLIC-SERVICE JJ
LOBBIES NNS
COMPETITVE JJ
INDISPENSABLE JJ
TRICKLING VBG
NET JJ NN VB NNP
BRISCOE NNP
PLUGGED VBD
DROOLED VBD
CRAFTY JJ
BEST-SELLING JJ JJS
NEV NNP
THEOLOGIAN NN
NEW JJ NNP NNPS NN
BLANKENSHIP NNP
INNIS-MAGGIORE-OLSON NNP
ILLS NNS
RESIGNATIONS NNS
NEGATED VBN
ANTI-JONES JJ
PORRIDGE NN
NFL NNP
IDEOLOGIES NNS
POORE NNP
CIRCUITS NNS
EXAM NN
CLEAN-BANK JJ
SMITHSONIAN NNP
TUESDAYS NNPS
UNREALIZED JJ
BURRY NNP
CELLULAR JJ NNP
STENNETT NNP
LASER NN NNP
INDENTICAL JJ
STICKING VBG JJ NN
PRESIDENT-U.S. NN
ECONOMICS NNS NNP NN
NGL NNP
427.7 CD
PRIMARY JJ NN
PREVENTED VBN VBD
O&Y NNP
5,745,188 CD
BURST NN VBP VBD
SIGHTS NNS
EXBT NNP
CADETS NNS
STONERIDGE NNP
DUNE-GRASS NN
247,000 CD
TAX-FREE JJ
WALCOTT NNP
ALTON NNP
CAPITAL NN NNP JJ
ANNUM NN
NHI NNP
VOLUMINOUS JJ
MIND-SET NN
FORECASTERS NNS
80-MEGABYTE JJ
ALTOS NNP
BORNEO NNP
GRID NN NNP
METROMEDIA NNP
184-DAY JJ
BORNER NNP
KRESS NNP
885,800 CD
DRAWING VBG NN
GRIM JJ
SANDIA NNP
INTERESTINGLY RB
GRIP NN
DRUMBEATING NN
500-LAWYER NN
LOWER-PRIORITY JJ
ENNUMERATED VBD
ABSENT JJ VB JJ|IN
VIRTUOSOS NNS
ADJUSTS VBZ
TWO-PART JJ
SANDIP NNP
NIH NNP
SOCIALLY RB
190.125 CD
CELANESE NNP
ECONOMIES NNS
SUPREMELY RB
RUFFLED VBN
COLLECTIVE-BARGAINING JJ
VETERINARY JJ
SUPPLYING VBG
HAMMERTON NNP
RETAIL-BASED JJ
HOARD NN VBP
STATE-APPROVED JJ
HOARE NNP
DERIVING VBG
HARRISBURG NNP NN
GHAZEL NNP
TENANTS NNS
CAUTIONARY JJ
UNMISTAKABLE JJ
BATTING NN VBG
NUCLEAR-ARMS NNS
SAUNAS NNS
HOMART NNP
DRAINING VBG NN
CREDITORS NNS
NORTHERN NNP JJ
LAXATIVES NNS
SHOWINGS NNS
BEEBE NNP
ENTICINGLY RB
MINORS NNS
LAGGING VBG JJ NN
RODEO NNP NN
LIPPENS NNP
LIGHTLY RB
ALFREDO NNP
NKF NNP
NKK NNP
IVERN NNP
MERCHANTS NNS NNP NNPS
PARAPHRASE VBP
EVER-GREATER JJ
LEAPFROG VB
UNCONNECTED JJ
CITADEL NNP
BEECH NNP
CHADHA NNP
SCHOOL-DISTRICT NN
SHRINES NNS
LECHERIA NNP
KOSOVO NNP
SHOESTRING NN
FOOLHARDY JJ
KYONG NNP
STRIKING JJ VBG
THEMATIC JJ
20-BOND JJ
CERTAINTY NN
TERRITORY NN
NEWBORN JJ
LICENSING NN VBG
SUCKOW NNP
187.1 CD
NME NNP
CHEKHOVIAN JJ
187.4 CD
40.1 CD
344,354 CD
40.3 CD
CLICK NN
40.4 CD
187.8 CD
40.5 CD
40.6 CD
40.7 CD
UNCHECKED JJ
40.9 CD
UNIMAGINABLE JJ
ESTUARIAN NN
REINVIGORATE VB
BACKSLAPPING VBG
HARMONIA NNP
RAILCARS NNS
HARMONIC JJ
877,663 CD
CONVINCED VBN JJ VBD VBN|JJ
GRIESA NNP
ANTI-DEVELOPMENT JJ
CANONIE NNP
MOXLEY NNP
COVERAGES NNS
BACK-ON-TERRA-FIRMA JJ
SCOTCH NN NNP
CONVINCES VBZ
NO. NN NNP VB JJ
PROFITEERING VBG
PERFORMS VBZ
REHABILITATION NN NNP
ENSRUD NNP
TRANSLUCENT JJ
COMBINATION NN
CHICKEN NN NNP
GOGOL NNP
UNLEASHED VBD VBN
SURRENDER VB NN
EXIT NN VB
LASMO NNP
SPREADING VBG
335,700 CD
GROW VB VBP
NOB NNP
DAEWOO NNP
NOD NN
DISAPPOINTMENTS NNS
SANDOR NNP
UNLEASHES VBZ
DOCUMENTED VBN
BEEFY JJ
OUTSIDER NN
SANDOZ NNP
NOR CC
NOT RB
NOV NNP
NOW RB NNP JJ
TREMOR NN
WEAKEN VB VBP
LOADING NN VBG
LESS-RIGOROUS JJR
WEAKER JJR
SIDLEY-ASHURST NNP
NPD NNP
CLIFF NN NNP
BOARDING VBG
LINCOLN-MERCURY-MERKUR NNP
STARRING VBG
CRAMMING VBG
DRAFTING VBG
ECHELONS NNS
CRIMINAL-JUSTICE NN
ANACHRONISM NN
NORTEK NNP
VOLUME NN
CURDLING NNP
PROMISED VBD VBN JJ
LAND-IDLING JJ
REGIMENTED JJ
EMBRYONIC JJ
TROUGHS NNS
FURIOUS JJ
CO-PUBLISHER NN
SUBWAYS NNS
ARLINGTON NNP
DEPENDING VBG
PROMISES VBZ NNS
ROSIER JJR RBR
DWARF VB NN VBP
EFFICIENCY NN
ARCTIC NNP
MACE NNP
CAKED VBD
MINNELLI NNP
UNIVERSAL NNP JJ
SANDRA NNP
NETWORK-SERVICES JJ
MANUFACTURE VB NN VBP
MACK NNP
KURNIT NNP
SMACKS VBZ
SHRINKS VBZ
DELANEY NNP
NRC NNP
SEIZED VBN VBD
LIFEGUARDS NNS
SIMPLICITY NN
SANDRO NNP
RECORDERS NNS
MACY NNP
ROUTINELY RB
26-7 JJ
BERMUDA-BASED JJ
DEALER NN
PROPERTIES NNS NNP NNPS NN
NRM NNP
SCRUTINIZE VB
SEIZES VBZ
TEMPERED VBN
KYOTO NNP
MADD NNP
MADE VBN VBD NNP
KNIGHTS NNS
BOLSTERING VBG
NICHES NNS
THIN-LIPPED JJ
PANICKED VBD
CORPORATE-BOND JJ
112.625 CD
NSA NNP
NSC NNP
54,000 CD
MEDTRONIC NNP
MULTIBANK NN
26.1 CD
VEAL NN
26.2 CD
26.3 CD
26.5 CD
26.6 CD
SELF-INSURE VBP
26.7 CD
INDIVIDUALLY RB
26.8 CD
26.9 CD
ANDERSEN NNP
CHRISANTHOPOULOS NNP
GOVERNED VBN VBD
CONSENTUAL JJ
UNIONS NNS
VEBA NNP
TAPE-RECORDED JJ
PULITZER NNP
PROLETARIAN JJ
AUTIONS NNS
SCOTIA NNP
NORTHY NNP
SHORTER-TENURE JJ
GOVERNER NNP
NTG NNP
NAHAS NNP
PULLBACK NN
LIFESTYLE NN
NIPPONESE JJ
IDEOLOGIST NN
DUPLICATING VBG
NTT NNP
INFINITI NNP
DEVALUATION NN
UTRECHT NNP
STUDIOUS JJ
UPCOMING JJ
TRIBOROUGH NNP
SCREECHED VBD
U.N.-BACKED JJ
FORWARDS RB
EXISTENCE NN
2600 CD
BLOCH NNP
BLOCK VB NN NNP JJ VBP
KYOWA NNP
CATSUP NN
NUM NNP
NUN NN
NUT NNP
PAYOFFS NNS
BEEPING NN VBG
CONCEIVABLE JJ
NUX NN
EXPO NN NNP
FOX-MEYER NNP
UNIFICATIONISM NNP
.WHAT WDT
LAYING VBG
WENCESLAS NNP
LASTS VBZ
IMPERATIVES NNS
UNIFICATIONIST JJ
BONAVENTURE NNP
FIANCEE NN
SNATCHERS NNPS
CAPITOL NNP NN
DIVESTING VBG
CONCEIVABLY RB
PREACHING NN VBG
FLAPPING VBG
DOWNSIZE VB
TICKED VBN
EUROCONVERTIBLE JJ
MAHE NNP
CUMIN NN
FUNDS-SERVICE JJ
WELL-REGARDED JJ
GEN-PROBE NNP
RE-ENERGIZED JJ
TICKER NN
TICKET NN
HOBBLING VBG
NWA NNP
CLIMB NN VB
OBVIOUSLY RB
YOSHIRO NNP
COMRADES NNS
SIPHONING VBG
PROUDLY RB
OLYMPICS NNPS NNP NNS
ECONOMIST NN NNP
VEER VB
KENSETSU NNP
INGOTS NNS
BOURKE-WHITE NNP
NEWSNIGHT NNP
ATROCIOUS JJ
DABBLE VB
AUSSEDAT NNP
FRENCH-MADE JJ
MAID NN
DONGEN NNP
WESTVIEW NNP
OUTGAINED VBD
RHOADS NNP
MAIL NN NNP VB VBP
COUSINS NNS
CHUBB NNP
MAIN JJ NNP NN
MAJ. NNP
29,000 CD
HAIR-CARE JJ
UNTIL IN NNP
LEHAR NNP
CLING VBP VB
PEARCE NNP
SUVIVORS NNS
YEAR-AGO JJ
BUSCH NNP
DRUNKEN JJ
CONTRACTIONS NNS
PATRIARCA NNP
DESTEC NNP
DISCOMFORT NN
851,000 CD
CLINT NNP
JESSE NNP
TRIVIAL JJ
DARWINIAN JJ
PATRIARCH NN
RIVAL JJ NN VB NNP
TOURNAMENTS NNS
'80S NNS CD
VEGA NNP
25TH JJ
SAFE-DEPOSIT JJ
CARVAIN NNP
YASTRZEMSKI NNP
BERNHARD NNP
NYE NNP
NZ$ $
2640 CD
CHUCK NNP
BEEPS NNS
AGENT NN NNP
SPADAFORA NNP
AMERITECH NNP
VEHICLES NNS NNPS
MUELLER NNP
LUBYANKA NNP
FOUR-CRATE JJ
20-POINT JJ
DOUBLE-A-PLUS JJ
NYU NNP
MAKE VB VBP NNP NN
790.2 CD
RECEDING VBG
ROMANCE NN
SEAMIER JJR
RELENTING VBG
FLAMED VBD
SCRIBES NNS
ELECKTRA NNP
ISTHMUS NN
CODE-NAMED JJ NNP VBN
EXERTED VBN
NZI NNP
CANTOBANK NNP
BLOHM NNP
NEGOTIATIONS NNS
BRONNER NNP
LETTING VBG
FLAMES NNS
ALLEGHENY NNP
DOUBLE-CROSSED VBD
CLIPS NNS
KATHERINE NNP
MALE JJ NN JJ|NN NNP
HISSED VBD
NORTON NNP NN
HOPWOOD NNP
TECHNOLOGICALLY RB
BUSES NNS
MAIDENFORM NNP
WHIPSAW VB NN
VENTURA NNP
BALANCE-OF-PAYMENTS NNS JJ
MALL NN NNP
BUSEY NNP
MACHINES NNS NNPS NNP
TRIBES NNS
VENTURE NN NNP VB JJ
CUPBOARD NN
BEERS NNP NNS
VEIN NN
MID-WEEK NN
MALFUNCTIONS NNS
HOBBY NN
SUSTAINABILITY NN
TWISTING VBG NN
19-INCH JJ
HYDROCARBON NN
CRATERING VBG
SUBNATIONAL JJ
IMAI NNP
JIHAD NNP
MAME NNP
SWEEPING JJ VBG
MONTREAL NNP
DRUMMING VBG
ASSEMBLIES NNS
INCORPORATED VBN JJ VBD NNP
SHIPBUILDERS NNS
NICHOLS NNP
89,300 CD
UNDERSTANDING NN VBG
PREVENTS VBZ
INCORPORATES VBZ
ELUSIVE JJ
NICHOL NNP
NEINAS NNP
RED-FLAG VB
FUKUYAMA NNP
KERSCHNER NNP
RIVER NNP NN
MANN NNP
10-LAP JJ
CHERUBS NNS
2680 CD
MANY JJ DT RB PDT VB NNS
WATER-POLLUTION NN
ANDERSON NNP
PURNICK NNP
MINEFIELDS NNS
GLOWED VBD
CRUSHING VBG
856.3 CD
CHURCH-OWNED JJ
ECONOMIZE VB
WINDOWS NNS
BUSHY JJ
ADHERED VBD
432.61 CD
DEBT-TO-ASSETS JJ
FUDOSAN NNP
BERTUSSI NNP
16-HOUR JJ
GOVERNOR NN NNP
KIDDER NNP
PORCHES NNS
YONEHARA NNP
TOP-FOUR JJ
GIRAUD NNP
GENOCIDE NN
FORMULATING VBG
INSURANCE-COMPANY NN
TWO-MONTH JJ
MAPS NNS
KONOPNICKI NNP
432.78 CD
523,000 CD
DISPERSING VBG
440.99 CD
IMPLICATION NN
DEMOCRATIC JJ NNP
POSTPONED VBN VBD
SCOTTO NNP
BERLIN NNP JJ
WORLD-WEARY JJ
PHOTOS NNS
URGINGS NNS
GUNDLE NNP
SCOTTS NNP
HERRINGTON NNP
HEROES NNS
ROMANIA NNP
CABLES NNS
FLOATING-POINT NN JJ
10-YEAR-OLD JJ
ARAB-ISRAELI JJ
SHIPPED VBN VBD
COCKPIT NN
KENAN NNP
BLOND JJ
FORMULATION NN
CLIVE NNP
OAT-BRAN NN
190.58 CD
MANET NNP
ENGLAND NNP
522.3 CD
JAGUAR NNP NN
SHIPPER NN
TIEPOLO NNP
VENT VB
PROSECUTED VBN VBD
7.227 CD
BIERBOWER NNP
MARA NNP
ENJOIN VB
MARC NNP
PRUETT NNP
MARE NN
CELEBRATE VB VBP
ANTI-AIRLINE-TAKEOVER JJ
MARK NN NNP VB VBP
RUN-INS NNS
FUNDTRUST NNP
DOCILE JJ
220,000 CD
BLOOD NN NNP
MARS NNP
MART NN NNP
IMPROVISATION NN
CONVENTIONS NNS
WEEDS NNS
MARX NNP
BLOOM NNP
MARY NNP
SUCCUMBED VBD VBN
RED-FACED JJ
FORMATS NNS
STUTTGART-BASED JJ
DESIGNED VBN VBD
MUTATIONS NNS
696.1 CD
789,000 CD
AFRIKANERS NNPS
PEARLS NNS
ROTHSCHILDS NNPS
BLACKOUTS NNS
MEMOTEC NNP
MASK NN NNP
SYNDROME NN
DESIGNER NN
EDUCATING VBG
MASS NNP NN JJ RB
PAIRED VBN
DWELLING NN
SEABROOK NNP
LUGGED VBD
SETTLEMENTS NNS NNP
WAFFLED VBD VBN
10,100,000 CD
OAK NNP NN
1,342,264 CD
PRICINGS NNS
PARAKEETS NNS
OAS NNP
OAT NN NNP
MOTIVES NNS
MATE NN
BALCONY NN
HIGHER-SALARIED JJ
LOVEBIRDS NNS
ADVANCED-CERAMICS NNS
MATH NN NNP
ASTRONOMY NNP
UNWELCOME JJ
DICKERING NN
BREENE NNP
RETAILS VBZ
INTERGOVERNMENTAL JJ
EXCITEMENT NN
MATT NNP
HEROIC JJ
FLECKENSTEIN NNP
EDUCATION NN NNP
DOYLE NNP
TRACTOR NN
PROMOTING VBG
CHUMS NNS
CHRISTMAS-LIKE JJ
NOVICE NN
DETERRING VBG
HEROIN NN
LIPTAK NNP
MANIA NN
LURCHED VBD
DOG-EARED JJ
MANIC NNP JJ
STELCO NN NNP
NOVICK NNP
MAUI NNP
CONFERRING VBG
MAUL VB
MAGNETS NNS
ABATEMENT NN
SORENESS NN
BREASTS NNS
OCC NNP
CHUNG NNP
EREMBAL NNP
CHUNK NN
DAREMBLUM NNP
7,800 CD
WIRETAP NN
INCURRED VBN VBD
PESTERED VBN
ATTEMPTING VBG
ORNERY JJ
PHILOSOPHERS NNS
LUMP-SUM JJ
CARSTENS NNP
TRENCH NN
ASSEMBLING VBG
VERY RB JJ NNP
OCT NNP
PROMOTION NN NNP
SIGNALLING VBG
WOODMAC NNP
LEHNE NNP
ENLIST VB
NONPERFORMERS NNS
MARKETEERS NNS
COUNTRYMEN NNS
RETAINS VBZ
ODD JJ NNP
ODI NNP
PRONOUNCED VBD JJ VBN
ANTITRUST-LAW JJ
7.272 CD
MIGNANELLI NNP
VEST NN
PINBALL NN
CHILDREN NNS NNP
RESUMING VBG
CRUISE NN NNP VBP
VACCINES NNS
PRONOUNCES VBZ
LATCH VBP
OXFORDSHIRE NNP
TRENDS NNS
72-GAME JJ
SMEAL NNP
TRENDY JJ
JEEP-LIKE JJ
LITHOX NNP
ENJOYMENT NN
RESTRAINT NN NNP
VETO NN VB
HUSSMAN NNP
DESTINY NN
VERITRAC NNP
OEL NNP
7.282 CD
UNFOLDING VBG
RESCIND VB
CROWDED VBN JJ VBD
TENDERED VBN JJ VBD
CONCEIVE VB
OEX NNP
FOLLIES NNS
RESILIENT JJ
ENLIVENING VBG
11.01 CD
CHUGAI NNP
11.04 CD
11.07 CD
HONEYWELL NNP
MAGRUDER NNP
11.08 CD
PROGRAMMABLE JJ
MUSICIAN NN
328,000 CD
DIBENZOFURANS NNS
RIVERS NNS
OFF RP IN RB JJ RB|IN
VERBAL JJ
CENTERBANK NNP
GENDARME NN
FAMILIARIZATION NN
EIGHT-TEAM JJ
7,839 CD
PRICE-SKIRMISHING JJ
FUNNEL VB
BUDGETEERS NNS
WORKERS NNS NNPS NNP
CIRCUMLOCUTION NN
11.10 CD
GEMINA NNP
11.11 CD
11.13 CD
CYBER NNP
MAYO NNP
BEWILDERED VBN
LATER RB RBR JJ JJR
HOBOS NNS
OBLIGATORY JJ
CHROMOSOME NN
P&G NNP
ENTRUSTED VBN
PREMARIN NNP
WEEKS NNS
VOICE-PROCESSING JJ
INVOLUNTARILY RB
CHURN VB VBP
COMMANDANT NN
NONSTOPS NNS
WEDTECH NNP
BELMONTS NNPS
HAMMOND NNP
2112.2 CD
KEYNESIAN JJ
OPERATING-PROFIT NN
PLACEMENTS NNS NNP
MAZE NN
HERONS NNS
ZOSEN NNP
TELECUSSED VBD
RELATIONS NNS NNPS NNP
KENJI NNP
MEDALIST NN
11.25 CD
11.28 CD
RIVETS VBZ NNS
SAMSUNG NNP
MARKET-REVISION NN
FINANCINGS NNS
BLOWN VBN
SLOW-STARTUP JJ
RESONATED VBD
FEEDBACK NN
CONFLICTS NNS
JOHANNESBURG NNP
BLOWS NNS
BRIDGEVILLE NNP
HONESTY NN
AUTO-MARKET NN
CASE-BY-CASE JJ
LAWRENCEVILLE NNP
OVERTURNED VBD VBN
COMMUNICATING VBG
BUSTS NNS
ADJOINING JJ
RESONATES VBZ
ROECK NNP
CHUTE NN
35.875 CD
LOBBYISTS NNS
11.38 CD
SIRRINE NNP
FERN-LIKE JJ
MANOR NN NNP
348.2 CD
348.4 CD
ANTAGONISTIC JJ
OIL NN NNP
MINUSES NNS
GLUCKSMAN NNP
SHIITE JJ NNP
20-STOCKS NNS
MISREPRESENTED VBD
MEMBERSHIP NN NNP
BLINKING RB
11.41 CD
PROSECUTOR NN
COMMUNICATION NNP NN
EVENED VBN
11.44 CD
MISHANDLED VBD
CARCINOGEN NN
HOT-COLD JJ
MALIGNANT JJ
PRECEDED VBN
BANALIZATION NN
OJI NNP
LEBARON NNP
HODGKIN NNP
RENDELL NNP
EYED VBD
THRIVING VBG JJ
PRECEDES VBZ
GARDINER NNP
HENNESSY NNP
CUAUHTEMOC NNP
TYSZKIEWICZ NNP
EQUIPPING VBG
ODDS-ON JJ
11.50 CD
EYES NNS
11.53 CD
LATIN NNP JJ NNPS
ANATOMICAL JJ
MARINARO NNP
CONFIDENT JJ
ONE-WEEK JJ
COCOA-TRADING JJ
OKA NNP
11.56 CD
TEIKOKU NNP
3RDAND CD
11.57 CD
RESULTING VBG JJ VBG|JJ
DISREGARDED VBD
DIRECTMAIL NN
DESPERATION NN
BULLIED VBD
268.3 CD
OL' JJ
POLSKY NNP
HIGH-YIELDING JJ
GLARING JJ
268.6 CD
STELLA NNP
GOTLIEB NNP
FONDA NNP
RECOUNTED VBD VBN
PERFECT JJ NNP
PRINTING NN VBG NNP VBG|NN
BULLIES VBZ
RESCISSIONS NNS
11.60 CD
PADDING NN
PONDEROUSNESS NN
HINDER VB
11.66 CD
OCCUPANT NN
PENALTY NN
CATTLE NNS
OLD JJ NNP
VIRTUAL JJ
PHINEAS NNP
MIDYEAR NN
HITCH NN
STANDING-ROOM-ONLY JJ
2.5-TON JJ
UNEXPECTED JJ
COMMMON JJ
11.71 CD
QUINCY NNP
11.72 CD
CALABASAS NNP
STATUTES NNS
OMB NNP
RECOMMENDATONS NNS
BLUNDERS NNS
3406.31 CD
11.79 CD
188.1 CD
SPORTED VBD
188.2 CD
SOUNDNESS NN
ENLARGED JJ VBN
RAPIDS NNP NNPS
41.1 CD
188.5 CD
41.2 CD
41.3 CD
188.7 CD
41.4 CD
DOUBTERS NNS
41.5 CD
ARDEN NNP
PUBLICIZED VBN JJ
41.8 CD
P-3 NN
IRRESISTIBLE JJ
LOUDSPEAKERS NNS
BILGES NNS
11.80 CD
PRIMITIVE JJ
BREEZE NN
11.88 CD
TARWHINE NNP
P-E NNP
ONE CD NN PRP NNP CC
GUNBOATS NNS
RAPIER NN
IMPROPRIETY NN
ONG NNP
STALWARTS NNS
STREHLER NNP
DATATRONIC NNP
NAVIGATOR NN
BREEZY JJ
SHOE-HORN VB
JURISTS NNS
BANK-BRANCH JJ
11.90 CD
11.91 CD
APPOINT VB
11.95 CD
ROTTING VBG
PYRAMIDS NNS
P.M RB NN
RAINWATER NNP
PHILOSOPHICALLY RB
GADSDEN NNP
REDUCE VB VBP
ENJOYS VBZ
PENALIZED VBN
SMELL NN VBP
DAMAGE NN VB VBP
TOLERATE VB
LEVELED VBD VBN
TRAGICOMIC JJ
PRIORITY NN JJ
NEWS-WEEKLIES NNS
CHIEFLY RB
STOCK NN NNP VB JJ
SMELT VBN
EARNINGS-RELATED JJ
SIX-FOLD RB
AGRICULTURE NNP NN
WARRANTED VBN
PENALIZES VBZ
METABOLISM NN
HOSPITALIZED VBN
SLIGHTLY RB
VIRTUES NNS
OPT VBP VB
LIPTON NNP
HURLING VBG
EARTHSHAKING JJ
GROCERY NN NNP
NASHUA NNP
PAPERBOY NN
URINE NN
SOLIDIFY VB VBP
CONTINUINGLY RB
BEAUTIFULLY RB
SPORTIF FW
TARGETED VBN JJ VBD
CRUISERS NNS
CROSS-PURCHASE JJ
EVENLY RB
COYOTE NN
CALEB NNP
MECCA NNP
RELAXING VBG JJ
ORE NNP NN
CALLERS NNS
UNILEVER NNP
ARMENIAN JJ
SPILLED VBD VBN
CONSERVATORY NN NNP
CONDITIONERS NNS
GRENADA NNP
PEPSICO NNP
ORR NNP
VIOLATE VB VBP
BREADBASKET NN
DEFAULT_TAG: 
40TH JJ
KAZIS NNP
HARD-WIRE JJ
PHENIX-TRANSMISSION NNP
AUDITORIUM NNP
OPTICAL-DISK JJ
RED-CARPET JJ
27.1 CD
27.2 CD
27.4 CD
27.5 CD
27.6 CD
27.7 CD
27.8 CD
27.9 CD
SIX-FOOT JJ
FOX-PITT NNP
FIESTA NNP
MOST-STRIDENT JJ
HACKSAW NNP
OTC NNP NN
HYDRO-QUEBEC NNP
FRENETIC JJ
ANTI-STALINIST JJ
OTS NNP
JURISDICTION NN
SLIPPERY JJ
COMMODITY-ORIENTED JJ
WEATHER-RELATED JJ
PRESENTING VBG
BUSHEL NN
ORGANIZERS NNS
CHEMFIX NNP
EURONOTES NNS
CONCLUDING VBG
DISALLOWED VBD
NUTTING NNP
1472.76 CD
PROVOKED VBN VBD
BUSHES NNS
OHMAE NNP
ESPOUSAL NN
ALREADY-SHAKY JJ
FLUCTUATED VBD VBN
BULLION NN NNP
OUR PRP$ NNP
P53 NN CD
OUT IN RP RB JJ NN NNP
BDDP NNP
MARK-UP NN
DEDUCES VBZ
HADSON NNP
BERNARD NNP
CALIF NNP
FLUCTUATES VBZ
INSURERES NNS
KHAN NNP
INDETERMINABLE JJ
IMPRESS VB
SKYSCRAPER NN
PROTECTED VBN VBD JJ
HASHIDATE NNP
SPECIALIST-FIRM JJ
ABDICATE VBP
AGGRESSIVE JJ
BACKWARDS RB JJ
AFTERWARDS RB
CECCONI NNP
SUNSETS NNS
HIGH-MINDEDNESS NN
BARBA NNP
FULTON NNP
CALIFORNIANS NNPS NNS
KOBAYASHI NNP
HORROR NN
CUNIN NNP
UNCONSCIOUSLY RB
POINT-PEPPERELL NNP
RAPING VBG
COCKROACHES NNS
BARBS NNS
OWE VBP VB
SAFEGUARDING VBG
RELISHED VBD
ICELAND NNP
BUSINESSPEOPLE NN
OWL NN
GROSSLY RB
ACQUIESCE VB
OWN JJ VB VBP NNP VBN
BERMAN NNP
TELL-ALL JJ
ARDOR NN
REINVESTED VBN VBD
NORCROSS NNP
BREATHE VB
RELISHES VBZ
BUFFALO NNP
SCIENTIFIC JJ NNP
THEOCRACY NN
MOMENTS NNS
STOKE VB
BARCO NNP
BREATHS NNS
KANJORSKI NNP
BREATHY JJ
2736 CD
SATELLITE-ASSEMBLY NN
LEGAL-SERVICES NNS
PRODUCTIVITY NN NNP
BUTCH NNP
WREAKING VBG
PEDIGREES NNS
CUPERTINO NNP
ACUPUNCTURIST NN
INSATIABLE JJ
HUNTING NN VBG
'90S NNS CD
CRUDE-OIL NN JJ
26TH JJ NNP
STOLE VBD
RECOMMENDATIONS NNS
37,300 CD
STREAK NN
BELIEVABLE JJ
REFORM NN NNP VB
ENTIRELY RB
STREAM NN NNP
UNSTEADY JJ
STOLL NNP
CALLS VBZ NNS NNPS
LOOSEN VB
HUSKER NNP
JENKINS NNP
BULLISH JJ
LOOSER JJR
EVENTS NNS
LEIBY NNP
ADVANCERS NNS
TOP-PERFORMING JJ
ESCROWED VBN
STRENGTHENING VBG NN JJ
COMPOSITIONAL JJ
EXTRAVAGANT JJ
LORILLARD NNP NN
INTER-CITY JJ
BELONGINGS NNS
PURPORTEDLY RB
BROTHER-IN-LAW NN
GRUMBLE VBP
RECORD-BREAKING JJ
JETTY NN
ASTORIA NNP
TROOP NN
SHOPPERS NNS
SCAPEGOAT NN
WESTIN NNP
BUCCANEERS NNS
WORSENING VBG NN
WARPED JJ
JAFFRAY NNP
TRANSIT NNP NN
STRATEGIC JJ NNP
STONE NNP NN
SNOWSUIT NN
HANDCUFFS NNS
FRESHMAN NN
USABILITY NN
NECKTIES NNS
INTERCEPTED VBN
70-30 JJ
REASSERTS VBZ
LANDING NN NNP VBG
FORMALITIES NNS
BARGE NN
REALITIES NNS
MORSELS NNS
STOOD VBD VBN
FREIGHTWAYS NNP NNPS
THRIFT-BAILOUT NN JJ
PENNELL NNP
ACRES NNS NNP
MEDIAN JJ NN
MORE-SENIOR JJR
APPARTUS NN
28.125 CD
CALOR NNP
DEWITT NNP
GAS-FIRED JJ
RAPIST NN
CHUCKLING VBG
26\/32 CD
MAN-HOURS NN
TROUTMAN NNP
DOZEN NN NNP
PROPRIETARY JJ NN
FARTHEST JJS
SESSION NN
UNDISPUTED JJ
SALMONELLA NN
INC. NNP NN
CESSATION NN
PIASTERS NNS
MORE-PRESSING JJ
GUARANTY NNP
MELANCHOLY JJ
CHECK-KITING JJ
DEFENSIVENESS NN
FAIRWAY NN
STREEP NNP
FRIGHTENING JJ
SUBSTANTIATE VB
OUTRAGE NN
STREET NNP NN
STOPS VBZ NNS
CASPITA-BRAND JJ
CHEMICALLY RB
INCA NNP
INCH NN VB
ADDICT NN
INCO NNP
IND. NNP
LEIGH NNP
CLASSIFICATION NN
RESELLERS NNS
BARIS NNP
KICKS VBZ NNS
DEBT-FOR-ENVIRONMENT NN
PORNOGRAPHY NN
GINNIE NNP
MARRIAGES NNS
BLOATED JJ
PROVIDENT NNP
SHEPHERDED VBD
POLYCONOMICS NNP
THEATERS NNS
AWAKENED VBN
REUBEN NNP
LOW-LYING JJ
BUSINESS-VENTURE JJ
38-CENTS-A-SHARE JJ
WEALTH NN NNP
GIZMO NN
KAZUO NNP
CONSULTANT NN
STORE NN VB NNP VBP
GENCORP NNP
SYSTEM-MANAGEMENT NN
FUNNELED VBN VBD
NAMIBIA NNP
STORK NNP
STORM NN
1,075,000 CD
NAILS NNS
CARIBBEAN NNP JJ
FRESHMEN NNS
TRIMESTER NN
STORY NN NNP
ISADORA NNP
DEPLETION NN
HARMONIOUS JJ
ISADORE NNP
UNSUPPORTED JJ
LIKELY JJ RB
OBSCURE JJ VB
WAIVING VBG
CASTPARTS NNP
INEZ NNP
NATIVES NNS
SOUND-ALIKE JJ
REGRETS VBZ NNS
IMMUNITY NN
NOMINATION NN
NOT-GUILTY JJ
90-POUND JJ
GENERATION-SKIPPING JJ
TROUT NNP NNS
523.6 CD
PINBALL-PARLOR NN
WESTON NNP
COMBINED VBN JJ VBD NNP
HILTONS NNPS
PROTECTOR NN
EXPIRATION NN
CIRCUMSTANTIAL JJ
TRANSOL NNP
SECOND-HALF JJ
PENNY-BROKERAGE JJ
CAR-RENTAL JJ
NICKNAMED VBN
NAMEPLATES NNS
DIVVIED VBN
MOHANDAS NNP
TRICKS NNS
COMBINES VBZ NNS
ONE-QUARTER NN
CONDENSED JJ
5.8125 CD
SUNKEN JJ
LIBRARIAN NN
ENTIRETY NN
INDIANA NNP
TRICKY JJ
MENTALITY NN
NICKNAMES NNS
CONTRAS NNPS NNP NNS
WONDERFULLY RB
DECREASE VB NN VBP
ORANGE NNP NN JJ
NAME-DROPPERS NNS
PANHANDLER NN
PA. NNP
EXPAND VB VBP
8,355 CD
50%-STATE-OWNED JJ
HAMILTON-DORGAN NNP
PIANIST-COMEDIAN NN
INDIANS NNPS
ANTI-DEFICIENCY NNP
PULL-BACKS NNS
MYERS NNP
ON-LINE JJ
APARTHEID NN NNP
EXXON NNP NN
NO-MORE-NONSENSE JJ
PAC NNP
ATTRIDGE NNP
PAD NN
PAE NNP
CONRAD NNP
HANDICAP NN VB
PAL NN
PROVIDERS NNS
REPRODUCTION NN NNP
TOWNHOUSES NNS
PAN NNP VB
443.6 CD
PAO NNP
PAP NN NNP
EXPLOITING VBG
PAR NN JJ NNP IN
SECOND-HAND JJ
PAT NNP NN
BRUTAL JJ
PAY VB NN VBP NNP
PAZ NNP
PUBLISHING-GROUP JJ
SINTEL NNP
CALVI NNP
DIFFER VB VBP
STOVE NN
JIANGSU NNP
CAREER-RISKING JJ
BARNS NNS
SCHEMERS NNS
ALVIN NNP
DISMISSING VBG
OPENED VBD VBN
SQUELCHED VBN
NUMERICAL JJ
LIQUIDATE VB
THWARTED VBN VBD
PBS NNP
PG-13 NN
OPENER NN
DEVARIO NNP
HOCKE NNP
CUSTOM-CHIP JJ
SINGLE-A JJ NNP
SINGLE-B JJ NN
PW4060 NNP
BARON NNP
SINGLE-D JJ
SHUNNED VBD
3RD-QUARTER NNP
KONG-DOLLAR NN
REINCORPORATED VBN
MOST-LIKELY-SUCCESSOR JJ
CRANDALL NNP
HANDFUL NN
QUEZON NNP
PCP NNP
MAGISTRATES NNS
8,385 CD
STIPPLED JJ
PICKING VBG NN
PCS NNS NNP
PARRIED VBD
BERRIGAN NNP
SPEARHEAD NN
11TH-GRADE JJ
FOUNDERING VBG JJ
BOOSTERS NNS
RANGERS NNS NNPS
HIGH-NET NN
LATCHED VBN
ADMINISTERED VBN
409,000 CD
MALIBU NNP
SUGARY JJ
LIBRARIES NNS
PLACATED VBN
CATEGORY NN
ACTUALLY RB
LATCHES VBZ
X-RAYS NNS
7.375 CD
PDT NNP
SNORTS VBZ
HARDDISK NN
DISCOUNT-COUPON NN
MALICE NN
COLONEL NN NNP
MARIE-LOUISE NNP
OBSTACLE NN
UNEMPLOYMENT NN
KEOGH NNP
BOILED VBD
HUNGARIANS NNPS
COLUMNISTS NNS
INKS NNS
PEA NN
KAYTON NNP
PEE NNP
DAILIES NNS
PEG VB VBP NNP
BOILER NN
WIESLAWA NNP
283.2 CD
PEI NNP
283.3 CD
COMPUTER-MARKET JJ
283.7 CD
PEN NN
283.8 CD
283.9 CD
PEP NN
APPROVAL NN
PER IN FW
PET NN JJ NNP
STIPENDS NNS
NUTRITION NN NNP
BARRE NNP
CERTIFIED VBN JJ NNP
DEMOGRAPHICALLY RB
COMPUTER-BASED JJ
ATTENDEES NNS
ELECTRONIC-MEASURING JJ
BARRY NNP
FREDERIC NNP
TALBOT NNP
NEWMONT NNP
WHIPSAWED VBN JJ
OVERDRAFT NN
PAULINE NNP
SUPERB JJ
WHITEWASH NN
DEGENERATED VBD VBN
RISKIER JJR NN
FINAGLED VBN
SHORTRIDGE NNP
MESSENGERS NNS
MAXIMUM NN JJ NNP
PGM NNP
PH. NNP
429.9 CD
ADDING VBG
TAX-ADVANTAGED JJ
INDUSTRYWIDE JJ RB
NONWORKING JJ
CONVERSATIONS NNS
BARTH NNP
NAIVE JJ
NURTURE VB
HOME-STATE JJ
DISSECTED VBN
COSMOPOLITAN JJ NNP
INNS NNPS NNS
RUBENDALL NNP
FOURTHQUARTER NN
REPRODUCTIVE NNP JJ
PHI NNP
BUTTE NNP
REMAINED VBD VBN
COLONIA NNP
BIORESEARCH NN
DWIGHT NNP
CYCLING NN NNP VBG
GANGSTERS NNS
SEVEN-FIGURE JJ
RECLAIMS VBZ
LAUGH VB NN NNP
REOFFERED VBN
SEATTLE NNP NN
LEISH NNP
NON-PRESCRIPTION JJ
KALIPHARMA NNP
CHAFED VBN
PIC NNP
HIGHER-COST JJ JJR
BANQUET-HALL NN
PIE NN NNP
LYNFORD NNP
PIG NN
APPROVED VBD VBN JJ
EMBEZZLED VBD
GROUNDS NNS NNPS
PIK NNP
MINUTES NNS NNP NNPS
361,376 CD
PIN VB NN
LOCKING VBG
349.9 CD
PIR NNP
AKTIEBOLAGET NNP
AREAS NNS
DATA-STORING JJ
PIT NN VB
JENS-UWE NNP
SENIORITY-LIST NN
EMBEZZLER NN
APPROVES VBZ
STRIVING VBG
OPENLY RB
EASY-TO-FILM JJ
PLEASANT JJ NNP
DROP-IN JJ
AIRFARE NN
MAUMEE NNP
IMPERILED VBN
3.2-ACRE JJ
BEGAN VBD
HUMAN-RESOURCES NNS
WASTREL NN
BOASTED VBD VBN
STRESS NN VBP VB
CARRYFORWARDS NNS
USHIKUBO NNP
VENDING VBG
491.10 CD
HEALTHY JJ
NON-SEAMEN NNS
DISHONEST JJ
PLANNING NN VBG NNP
BOOZING VBG
1210.70 CD
12-STORY-HIGH JJ
CONTEMPLATED VBN VBD JJ
STOCKROOM NN
SAFEKEEPING NN
269.3 CD
STUNTED VBN
AMERIGAS NNP
NO-MISTAKES JJ
HAMBROS NNP
PRE-NOON NN
CREDIT-INFORMATION NN
CONTEMPLATES VBZ
BRIZOLA NNP
GASPED VBD
DESIGNATE VB JJ
THREAD NN
UNIONIST NN
FLEEING VBG
DISSENT NN
FOODS NNP NNPS NNS
KNEE-JERK JJ
ORIOLES NNP
GALLING JJ
PLC NNP
WARDS NNP
PINHEADED JJ
UNKNOWNS NNS
DAGGS NNP
CURTAILMENT NN
ZIRBEL NNP
THREAT NN
PLO NNP
MAPPING NN VBG
DECLINING VBG JJ NN
TELEVISION-RELATED JJ
PAID-UP JJ
STRUCTURE NN VB
HORSES NNS
TIMBERLANDS NNS
SPURNING VBG
ADDISS NNP
CROWELL NNP
PARRINO NNP
WILLENS NNP
CHAFIC NNP
FOOTHOLD NN
UNMELODIC JJ
WEDGWOOD NNP
TILES NNS
WARES NNS
42.0 CD
HIDEOUTS NNS
42.1 CD
42.3 CD
189.8 CD
42.5 CD
LEGISLATORS NNS
42.7 CD
HOODWINKED VBN
PHOSPHATE NNP
42.9 CD
WHITTIER NNP
CYCLE NN NNP
MCCARTY NNP
INTI NN
GOING VBG NN JJ
FRUEHAUF NNP
INTL NNP
FLABBINESS NN
INTO IN NNP
CYCLIST NN
THINKING VBG NN
FRAMATOME NNP
UPPED VBD
MIXTURES NNS
EXCISE NN VB JJ
PNC NNP
CONTROL NN NNP VB VBP JJ
INNER-CITY JJ NN
STREWN VBN
FEDERAL-MOGUL NNP
PNG NNP
CRIPPLING JJ VBG
LOAFERS NNS
UPPER JJ NNP
INTERIOR NNP JJ NN
NON-DEDUCTIBLE JJ
DESIGNATING VBG
20-DAY JJ
HELPERN NNP
491.50 CD
UNTOLD JJ
STARTERS NNS
RAVINES NNS
UTILIZATION NN
MEDIUM NN JJ
EXCITE VB
POD NN
HOME-COMPUTER NN
GOVERNORS NNS NNP
VANTAGE NN NNP
NONENTITY NN
DUBINSKY NNP
POL NN NNP
POP NN NNP VB VBP JJ
POT NN VB NNP
DESIGNATION NN
RISKING VBG
SOIREES NNS
POST-WORLD NNP JJ
MASSED VBD
MEDAL NN
APPALACHIA NNP
HAIR-TRIGGER JJ
DOUBTFUL JJ
1890S NNS CD
JACKHAMMERS NNS
PPG NNP
PPI NNP
STAYED VBD VBN
MASSES NNS
ILLNESSES NNS
15-TRADER JJ
SINISCAL NNP
475.35 CD
SOLD-OUT JJ
ASYLUM NN
12-BED JJ
OUTCOME NN
DRIPPING VBG
LANDSCAPES NNS
ROLAND NNP
10,300 CD
700-ROOM JJ
NO-SMOKING JJ NNP
TURNABOUT NN
DEFENSE-RELATED JJ
THICKER JJR
WONHAM NNP
THICKET NN
BLUEFIELD NNP
ACQUIRED VBN VBD JJ
PUMMEL VB
BAD-NEWS JJ
ECHEANDIA NNP
467.22 CD
GREETING VBG NN
28-STORY JJ
WRITEOFFS NNS
467.29 CD
ACQUIRER NN
FINKELSTEIN NNP
ACQUIRES VBZ
POLLUTION-REDUCTION NN
INTRIGUING JJ
ANALYSES NNS
AMNESTY NN
CAMEL NNP
VIGOROUSLY RB
PRA NNP
MCKESSON NNP
CAMEO NN
BEGIN VB VBP
STANDARD-ISSUE JJ
MEDCO NNP
263,684 CD
NON-COMMUNISTS NNS
CADBURY NNP
PRI NNP
MONETARY-STROKE-MILITARY JJ
TRADEMARKS NNS
MASSACRE NN NNP
KHALIFA NNP
PRO FW JJ NN
BEAL NNP
BEAM NNP NN
BEAN NNP NN
BEAR NNP NN VB VBP JJ
BEAT VB VBD VBP NN JJ
TORPEDO VB
BEAU NNP
CAPTIVES NNS
IDENTIFIABLE JJ
PADDED JJ
PSA NNP
BURNSVILLE NNP
LUBRIDERM NNP
ABERRATION NN
LAUNCH-VEHICLE NN
PSE NNP
SELECTIVELY RB
28.1 CD
28.2 CD
GALLIUM NN
SOUTHDOWN NNP
28.3 CD
28.4 CD
PRICE-JARRING JJ
28.5 CD
28.6 CD
28.7 CD
SYNONYMS NNS
FLATTERING JJ
28.8 CD
RICHTER NNP JJR
LAURA NNP
REMARKABLE JJ
LONG-DOMINANT JJ
LOW-BALL JJ
LUGGAGE NN
AGGIE NNP
CEASE VB VBP
PLANNED VBN VBD JJ NNP
FOOLS NNS
PTA NNP
INSTRUMENTAL JJ
LONGTERM JJ
REMARKABLY RB
STRIVEN VBN
WXRK-FM NNP
TINKER NNP VB
BORROWS VBZ
TILLY NNP
STRIVES VBZ
PLANNER NN
CLERK-TURNED JJ
PTL NNP
PRINCIPALS NNS
CIRCULAR JJ
BECK NNP
OBDURATE JJ
30-POUND JJ
INFLATION-FUELS-GROWTH JJ
Q45 NNP
SPACEBORN JJ
INHABIT VBP
ARCHIPELAGO NNP
TEXAN NNP JJ NN
RENEWALS NNS
AQUAMARINE NN
6-A-SHARE JJ
TEXAS NNP JJ
PUB NN
EL-SADR NNP
BUZZING VBG
BUSIER JJR
11.75-A-SHARE JJ
BUSIES NNS
UNRULY JJ
OVERRUN NN
STANDOFF NN
GUBER-PETERS NNP NNS JJ
CIRCLED VBD
LANGUAGES NNS
CORRIDORS NNS
COLOR-PRINTING JJ
TEARY-EYED JJ
PUT VB VBN VBD NN VBP JJ VBP|VB
UNDERWRITER NN
GALL-BLADDER NN
UNDERWRITES VBZ
BEDS NNS
PRIZE-FIGHTER NN
O'CLOCK RB
ANALYSIS NN NNP
CIRCLES NNS VBZ
ARENA NN NNP
HARPING VBG
SCOFIELD NNP
PVC NNP
ONEZIE NNP
WARNS VBZ
SYCOPHANTS NNS
UNINCORPORATED JJ NNP
ALFRED NNP
FIRESTONE NNP
JANLORI NNP
MULTIMATE NNP
BEEF NN VB
NIAGARA NNP
BRENMOR NNP
48-HOUR JJ
ARENS NNP
BEEN VBN VBP
DESCRIBING VBG
BEEP NN
BEER NN NNP
BEES NNS
BEET NN
PORCHE NNP
POST-JUNE JJ
SETTLEMENT NN NNP
HIV-1 NNP
SUBSIDIARIES NNS
PWA NNP
GODDESS NN
HANNIFIN NNP
STALWART JJ NN
EZRA NNP
NECESSITY NN
OVERDRAWN JJ
ECONOMIC-RESTRUCTURING JJ
MEDIA NNS NNP NN
PRESCRIPTION-DRUG NN
KICK VBP VB NN
ORDINANCES NNS
SCHEMES NNS
HALFTIME NN
REGENCY NNP
UP-AND-COMING JJ
HIDEOUS JJ
BEGOT VBD
GOTTESFELD NNP
SPORTS-ORIENTED JJ
HORSEHEAD NNP
BARBARESCO NNP
HUTCHISON NNP
THEMED VBN
SLOGANS NNS
NON-COMMUNIST JJ
WHOOSH VBP
VERSAILLES NNP
PORCH NN
RELIGIONE NNP
BEGS VBZ
WITHHOLDING NN VBG
MUNIAK NNP
27TH JJ
THEMES NNS
ACCUMULATED VBN
FLEISCHMANN NNP
KIDS NNS NNP NNPS
MINPECO NNP
RELIGIONS NNS
RESNICK NNP
ILL-FATED JJ
EMPLOYER-SPONSORED JJ
PYO NNP
GODIVA NNP
29YEAR JJ
BASED VBN VBD
2-A-MINUTE JJ
STIBEL NNP
KIEL NNP
TESTIFYING VBG
BASEL NNP
FAROOQUEE NNP
BANK-DEBT NN
MARRYING VBG
KIEP NNP
SENSATIONALISM NN
PADDLE NN
SEDUCTIVE JJ
MAJORS NNS
BREEDERS NNS NNP
RUNUPS NNS
COOKIES NNS
PERIMETER NN NNP
BASES NNS VBZ
KIEV NNP
PRE-18TH-CENTURY JJ
OAT-BASED JJ
MASSON NNP
PHILLIP NNP
LOAN-GUARANTEE NN
EXTRATERRESTRIAL JJ
BRILLIANCE NN
UNIQUE JJ
BREGER NNP
BOND-TRADING JJ NN
PORED VBD VBN
DOCKET NN
NIGHTLIFE NN
62.04 CD
CUTTING-TOOLS NNS
459.93 CD
DEVOTEES NNS
INPUTS NNS
CUOMO NNP
MUNICH NNP
BEIT NNP
ANTWERPSCHE NNP
WORLD-LEADING JJ
PORES VBZ
SITCOM NN
PINCHING VBG
NEAR-MONOPOLY NN JJ
SINGLE-HANDED JJ
LEIPZIG NNP
EDWIN NNP
FORGOTTEN VBN JJ
BENNINGER NNP
HNILICA NNP
UNFUNDED JJ
MONOPHONIC JJ
WHITING NNP
MESHULAM NNP
FOOTE NNP
BERNER NNP
DISTRIBUTE VB VBP
DUESSELDORF NNP
CRYSTAL NN NNP
EXERTING VBG
J.B. NNP
REMINDERS NNS
CUSTOM-DESIGNED JJ
STREET-CORNER JJ
TILTS VBZ
WARTS NNS
HOLDERS NNS
89,500 CD
TWO-A-DAY JJ
WITHHOLDINGS NNS
BETHLE NN
370,000 CD
INFECTING VBG
BUSILY RB
62.25 CD
MURAI NNP
MURAL NN
J.C. NNP
SHELLPOT NNP
RUNNERS NNS
CAMPO NNP
MISTRESSES NNS
CAMPS NNS
PURCHASING VBG NN NNP VBG|NN
CATTOLICA NNP
MARGINALIA NNS
SECTION NN NNP ,
FIRMED VBD VBN
1,120,317 CD
TEEN-AGER NN
INTENSIVELY RB
AWHILE RB
INFECTION NN
BELL NNP NN
923,500 CD
62.36 CD
SATURDAYS NNP
BELO NNP
BASIC JJ NNP NN
SEMICIRCULAR JJ
FIRMER JJR RBR
BELT NNP NN
70-LAWYER JJ
RECALCULATED VBD
ERASING VBG
NONCASH JJ
NO-LOAD JJ
J.D. NNP
POISONS NNS
BASIL NNP
CONCLUDE VB VBP
BELZ NNP
BASIN NNP
CELNICKER NNP
BEGUN VBN
BASIR NNP
BASIS NN
PACHECO NNP
44.625 CD
2890 CD
46.02 CD
SWEETEN VB
62.42 CD
POLYPROPYLENE NN
REORGANIZATION-PLAN JJ
INFANCY NN
CRITICIZED VBN VBD
J.E. NNP
JUDICIOUSLY RB
BERNIE NNP
EFFECTIVELY RB
21-MONTH JJ
MUCKED VBN
CRITICIZES VBZ
BEND VB
62.50 CD
VH-1 NNP
OFTEN RB
BENG NNP
CAMRY NNP
REJECT VB VBP
BENJ NNP
LINEUPS NNS
STICKLER NN
REINSTATEMENT NN
SLUMPS NNS
ENSUED VBD
ANTI-PROFITEERING JJ
HODGE NNP
BENS NNP
KIKI NNP
PREDICTING VBG NN
BENT NN JJ NNP
INWARDLY RB
778.6 CD
J.F. NNP
KIKO NNP
SEMINAR NN
BENZ NNP
TORCHBEARER NN
CONSISTENCY NN
RELIGIOUS JJ
TEENAGE JJ NNP
IDEOLOGY NN
PRECARIOUS JJ
7.422 CD
524.5 CD
UPHOLSTERY NN
UPHOLDS VBZ
46.25 CD
WHITISH JJ
ENROUTE RB
RESTARTING VBG
CHALLENGE NN VB NNP VBP
CONDEMN VB
MOTIVATE VB VBP
MIDCONTINENT JJ
KILL VB VBP NN
ANALYSTS NNS NNP
MARGINALLY RB
PREDICTION NN
DUMBEST JJS
NON-PROLIFERATION NNP
72%-OWNED JJ
EPISODES NNS
54.50 CD
62.70 CD
54.51 CD
FINISHING VBG JJ
BILLION-YEN JJ
APPEARED VBD VBN
62.75 CD
FLOWER-BORDERED JJ
ITALIANA NNP
54.58 CD
HESITANTLY RB
WELFARE NN NNP
YELLOWS NNS
RESIDENTIAL JJ NNP
ITALIANS NNPS
DEFLATED VBN VBD
STIRRED VBD
GHETTOS NNS
BATTLED VBD VBN
BASEMENTS NNS
NIGHTLINE NNP
7.445 CD
444.9 CD
SECURITY-CONNECTICUT NNP
KIND NN JJ RB NNP
OVERSAW VBD VB
BUCHNER NNP
EMBRACING VBG
TAX-REVISION JJ
GOODBYE NNP UH
KING NNP NN
COOKING NN VBG JJ
STEEL-INGOT NN
BATTLES NNS VBZ
VIAJE NNP
SCENARIO NN NNP
19.625 CD
UNDERWOOD NNP
PRIME-1 NN JJ
RESIDE VB
TAWANA NNP
PRIME-2 JJ
46.50 CD
PAINSTAKINGLY RB
38.32 CD
NEOPHYTES NNS
CLOCKS NNS VBZ
STAMFORD NNP
BERG NNP
PATRIA FW
54.75 CD
7.458 CD
BERN NNP
CARTING VBG
EVENTUALLY RB
RESUBMIT VB
TAUGHT VBD VBN
RELINQUISHED VBN VBD
RESEARCH NN NNP VB
BERT NNP
MACHINING NN
FUELED VBN VBD
HOME-EQUITY JJ NN
7,592,988 CD
EMERGED VBD VBN
175,000 CD
MIGHTA MD|VB
FREE-FOR-ALL NN
364.1 CD
FREEMAN NNP
VICISSITUDES NNS
OUTDOORS RB
INTIMIDATING VBG JJ
FAR-FLUNG JJ
SEMANTICS NNS
EMERGES VBZ
NOW-SCUTTLED JJ
GREENWOOD NNP
THAYER NNP
HAND-HOLDING NN
BEST JJS RBS RB
SIMPLICITIES NNS
HOUSEWIFE NN
JEEP-EAGLE NNP
EPISODIC JJ
110.1 CD
STANDOUT NN
MIGHTY JJ RB
NAFTALIS NNP
FIRMLY RB
SPIRALED VBD
110.4 CD
110.6 CD
MESSAGES NNS
328.85 CD
110.9 CD
BUMIPUTRA NNP
HEAPING VBG
BETA NN JJ NNP
38.50 CD
INGRAM NNP
BETH NNP
STEEL-IMPORT JJ
INTIMIDATION NN
HOMOLOGOUS RB
BETS NNS
J.L. NNP
HAIRSPRAY NN
APPLICATION NN
1,048,500,000 CD
BANXQUOTE NNP
OVERSEE VB
PROPELLING VBG
131,146 CD
SANGER NNP
46.80 CD
DEBT-RIDDEN JJ
RIDICULOUS JJ
RESIGN VB
COMPARED VBN VBD
LUXCO NNP
BURKINA NNP
MOISTURIZER NN
MAPLE NNP
NONINTERVENTION NN
AFORETHOUGHT JJ
VISHER NNP
KIRK NNP
NOXELL NNP
J.M. NNP
106,100 CD
MURKY JJ
TRANSATLANTIC NNP NN
COMPARES VBZ
NURSING-HOME NN
14-SEPT. NNP
SECURING VBG
ORDER-TAKER NN
1,296,800 CD
DIAGNOSING VBG
38.75 CD
DISTURBANCES NNS
DAKOTAS NNPS
BASSE NNP
PREDICTIVE JJ
COMPUTER NN NNP
CARROLL NNP
COMPUTES VBZ
ACTIONABLE JJ
PUNITIVE JJ
BEVY NN
TEXTS NNS
EXPANSIONISTS NNS
ARBORISTS NNS
KISS VB
HOBBIES NNS
HALLOWEEN NNP
LUBBOCK NNP
WOODSTREAM NNP
UNFAMILIAR JJ
221.61 CD
966.471 CD
MANDLE NNP
DEFENSE-SUPPRESSION NN
CRIME-RIDDEN JJ
FANCIER JJR
SENTENCED VBN VBD
FANCIES VBZ
IRKSOME JJ
KITS NNS
27.875 CD
RESTORING VBG
CREWCUT NN
ERICKSON NNP
MACHINIST NN
DILUTING VBG
WATKINS NNP
CHAIRMAN NN NNP
INDEX-ARBITRAGE-RELATED JJ
BRENNAN NNP
BAXTER NNP
CUSTODIAL JJ
SENTENCES NNS
WICHITA NNP
CEREAL NN
SEWING-MACHINE NN
INDECIPHERABLE JJ
SPECIALIST NN JJ
PATROL NN NNP
TATEISI NNP
BISCUIT NN NNP
PATRON NN
POOR-QUALITY JJ
J.P. NNP
PORTS NNS NNP
BRASIL JJ
ANTOLINI NNP
IMPEACHED VBN
SQUANDERING VBG
RED-BLOODED JJ
ACCORDANCE NN
WEAKENED VBN VBD JJ
BABCOCK NNP
BOVERI NNP
DILUTION NN
UNDISTURBED JJ
OVERWROUGHT JJ
SUICIDAL JJ
YQUEM NNP
JUDGED VBN
PORUM NNP
SPECIALITY NN
SHVARTZE NN
LOAN-LOSS JJ NN
CAMOUFLAGED VBN
LINTAS:CAMPBELL-EWALD NNP
CONTENTION NN
JUDGES NNS NNPS NNP
ASPIRE VBP
LUTHRINGSHAUSEN NNP
RIFFING VBG
ULTIMATE JJ NNP
STOCKPILING NN
ROSENBERG NNP
TWO-PRODUCT JJ
RAGGED JJ
DISTINGUISH VB
DISASTER-CONTINGENCY NN
STATISTICIAN NN
INTERCORPORATE JJ
KIWI NN
WEDDINGS NNS
SOLICITING VBG
MARKETING-COMMUNICATIONS NNS
J.R. NNP
LAVIN NNP
DEFENSE-PROCUREMENT NN
NON-TELEPHONE JJ
MANDOM NNP
DECIDE VB VBP
SCATTERED VBN JJ
ROGER NNP
BELZBERGS NNPS
EMPLOYMENT-TAX JJ
SNACK-FOOD NN
ONE-EIGHTH NN
FULL-SCALE JJ
CULPABLE JJ
MERRYMAN NNP
RICHARDSON NNP
RAZOR-THIN JJ
GULF NNP NN
LAISSEZ-FAIRE FW
DEFLATOR NN
ENSURE VB VBP
MEGA-RESORTS NNS
COMMONS NNP NNPS NN
ADDITIONS NNS
SCRUTINY NN
MATUSCHKA NNP
VICE-PRESIDENT NN
INTERNAL-SECURITY NN
DESK-TOP JJ
CHAIRMEN NNS
CLARIFYING VBG
TARTIKOFF NNP
ORDNANCE NN NNP
SHERWIN-WILLIAMS NNP
TACKED-DOWN JJ
TIMED VBN VBD
SAMARITANS NNS
MATAMOROS NNP
RESINS NNS
213.97 CD
DEMOGRAPHICS NNS
SECURITY NN NNP
42ND NNP
SACRIFICES VBZ NNS
DEFINITIONS NNS
GROWING VBG NN JJ
PEANUTS NNS NNP
NORWAY NNP
TIMER NN
TIMES NNS NNP NNPS CC
211,666 CD
43.1 CD
TIMEX NNP
43.2 CD
43.3 CD
43.5 CD
43.6 CD
WELLES NNP
43.7 CD
IOTA NN
NARROWNESS NN
MOBILIZING VBG
SEGUNDO NNP
TEASPOONS NNS
GUNS NNS
NHTSA NNP
CANAL NN NNP
PURSUANT JJ
SOAPS NNS
RESPECTS VBZ NNS
ANTI-FRAUD JJ
YUPPIES NNS
GIRDED VBD
HORTICULTURAL JJ NNP
OCEANOGRAPHIC JJ
COUNTERTOP NN
INFANTS NNS
DELEGATING VBG
SOONER RBR RB
ECKENFELDER NNP
STARDOM NN
TWO-RUN JJ
J.V. NNP
GIRDER NN
ROGIN NNP
IOUS NNS
WASH. NNP
TOTTER VB
CONSOB NNP
SPECIALIZE VB VBP
SINGLE-A-MINUS JJ NN
R.I NNP
DELMED NNP
WESTMINISTER NNP
PEDALED VBN
RARELY RB
GEOLOGY NN
SAYERS NNP
DELEGATION NN
J.W. NNP
SURTAXES NNS
FEE-FOR-SERVICE JJ
PYMM NNP
ANDREASSEN NNP
DILUTIVE JJ
COAST-BASED JJ
SOARS NNS
ARRIVE VB VBP
SANITIZED VBN
PERVERSE JJ
THERMOMETER NNP
MASTER NN NNP VB
DAYTONA NNP
IOWA NNP
SUCCESSES NNS
FLATTAU NNP
SMOLDERING VBG
TIMID JJ
COMING-OF-AGE JJ
TOLERABLE JJ
SISAL NNP
J.X. NNP
DEPART VBP VB
SURVEYS NNS VBZ
PUBLIC-HEALTH NN
HIGH-OCTANE JJ
PROFIT-DRIVEN JJ
CANDU NNP
HOLTZMAN NNP
PROTESTING VBG
CANDY NN
HELPFUL JJ
DEVOTEDLY RB
NON-FAT JJ
VINCENT NNP
HELIONETICS NNP
RESIST VB VBP
DETESTS VBZ
J.Y. NNP
HOUSEKEEPER NN
UNCHANGING JJ
GURU NN
SPARRING VBG
LABORER NN
LABOUISSE NNP
BANSTAR NNP
MYERSON NNP
NICKED VBN
TREASURY-BILL NN
PERHAPS RB
EXPLOSIONS NNS
TOILING NN VBG
PRISONER-MADE JJ
NICKEL NN JJ
GUSH VBP
INSERTED VBN VBD
NORODOM NNP
PLETHORA NN
ALLIGATOR NN
HOWSON-ALGRAPHY NNP
MARSTON NNP
FEATURING VBG
BORDERED VBN
SUBSCRIBERS NNS
MOHAWK NNP
EQUITIES NNS NNPS
29.1 CD
PRIOR-REVIEW JJ
29.3 CD
29.4 CD
29.5 CD
TRANSIT-ASSOCIATION NN
RENUNCIATION NN
PERIODIC JJ
29.6 CD
29.7 CD
29.8 CD
SCRAPPED VBN VBD
NAPERVILLE NNP
29.9 CD
SQUEEGEE VBP
PREVIEWS NNS
KINGDOM-BASED JJ
BACARELLA NNP
300-MEGAWATT JJ
TRANSYLVANIA NNP
NAMEDROPPER NN
OFFICIAL NN JJ NNP
CATALYTIC JJ
WILLFUL JJ
GELBART NNP
INGERSOLL-RAND NNP
MAALOX NNP
UNWED JJ
GUTS NNS
PALM-TREE NN
OUGHT MD
PAN-ALBERTA NNP
FLATTEN VB
TRUMPETING VBG
FRONTAL JJ
HURWITT NNP
OVERHANGING VBG
VOICED VBN VBD
FIEDLER NNP
HURWITZ NNP
NEGOTIATE VB VBP
EXCAVATORS NNS
JAPANESE-MANAGED JJ
AFFECTIONS NNS
UNDERWRITING NN VBG
OUTSTRIPPED VBD VBN
JOHNSON-ERA NN
ZAPPERS NNS
HOUSEWARES NNS NNPS
VOICES NNS VBZ
SALMON NN
UNACCUSTOMED JJ
MAILBOX NN
IMPLICATIONS NNS
PRE-PUBLICATION JJ
CONSUL NN
QUO NN FW
WEICHERN NNP
ANALYTIC JJ NNP
HIGHLANDER NNP
TALLEST JJS
YUPPILY RB
PLOTTERS NNS
HEAVY-CRUDE NN
CONNOTATIONS NNS
953.8 CD
MARYSVILLE NNP
LARGISH JJ
QVC NNP
POSTURING NN VBG
IMPEACHMENT NN
NEWHALL NNP
LOSING VBG NN JJ
SINDONA NNP
DOWNSTAIRS NN
SAMURAI NNP NN FW
RACIAL-MINORITY JJ
CAPTURE VB NN
130-LAWYER JJ
MCKAY NNP
PITCHMEN NNS
HARD-TO-FAULT JJ
80-PLUS JJ
BARRIERS NNS
BOMBAY NNP
HORTON NNP
LEFT-OF-CENTER JJ
250-170 JJ
KILLINGS NNS
AUTOBIOGRAPHY NN
REPROVE VB
BREUNERS NNP
FOUNDERS NNS NNP
CAPITALIZED VBN JJ VBD
AMPLIFIED VBN
TOURISTS NNS
UNLAWFUL JJ
WRIGHTING NN
BACKWATER NN
LAYOFFS NNS
ANTIANEMIA JJ
ONE-SIDED JJ
AMPLIFIER NN
ANTI-SCIENTIFIC JJ
SCOWLS VBZ
RELIABLE JJ
NON-CORE JJ
LITIGATORS NNS
CHANDELIERS NNS
BATCH NN
NAKED JJ
INTERMODA NNP
KNITWEAR NN
OMBUDSMAN NN
EFFORT NN
873.9 CD
SENSITIVITY NN
ANGELES-BASED JJ
HIGHLIGHTS NNS VBZ
INJUSTICE NN
RELIABLY RB
INDIGNATION NN
CHILD-DEVELOPMENT NN
ALEXANDER NNP
INDISTINGUISHABLE JJ
RECALLED VBD VBN
REBELLION NN
PHILO NNP
EQUITABLE NNP JJ
INDICES NNS
LYMAN NNP
NONCONFORMISTS NNS
CURRENT JJ NN NNP
SULZBERGER NNP
89-52 CD
28TH JJ
GUYS NNS
KOYATA NNP
ATTRACTIONS NNS
SOCIOLOGIST NN
EQUITABLY RB
SANGYO NNP
ASENSIO NNP
KRICK NNP
NICKLE NNP
170,330,000 CD
SECILIA NNP
SWEETHEART NN
ALIENATING VBG JJ
STERILIZED VBN
BATED JJ
SEVERENCE NNP
PROFITABILITY NN
MCKEE NNP
SIGLER NNP
SHOPKEEPERS NNS
BOMBED VBN VBD
BATES NNP
PHOTOSYNTHESIS NN
BOMBER NN
DISEMBODIED JJ
TEKNOWLEDGE NNP
SUCCESSOR NN
DIVIDENDS NNS
BUILDERS NNS NNPS NNP
POSED VBN VBD
GLITTER NN
DOWNED VBD
DISGUSTING JJ
SUTCLIFFE NNP
POSES VBZ
HEALTH-FOOD NN
ADVERTISERS NNS NNPS NNP
WARMHEARTEDNESS NN
DREARIER RBR
BIANCHI NNP
WARREN NNP NN
70,765 CD
DOWNEY NNP
CYCLICALS NNS
IMPERFECTIONS NNS
HIGH-STAKES JJ
CANNY JJ
18\/32 CD
SCREENING NN VBG
PANET-RAYMOND NNP
400-DAY JJ
SUPERIMPOSED VBN
COMPATIBLE JJ
CONTAINMENT NN NNP
ACTED VBD VBN
SPECIALIZING VBG
ABOLISH VB
WASTE NN NNP VB
MASS-MARKET JJ
IDAHO NNP
COST-CONTAINMENT JJ
FORTNEY NNP
GUNGHO JJ
MARWICK NNP
CANON NNP
DIRECTIONS NNS
VELVET NN
DEMAND-RELATED JJ
8,500 CD
TECHNICAL-SERVICES NNS
ASCRIBED VBN
INTERFERE VB VBP
FAMILY-RUN JJ
SIPPED VBD
SINGLE-ENGINE JJ
HEALTHDYNE NNP
BODDINGTON NNP
CLUSTERED VBN
HIGHER-QUALITY NN
BATHS NNS
VIDEODISKS NNS
LIVELY JJ
MASTRO NNP
FOUR-SQUARE NN
MOONIES NNS NNPS
LONG-TERM-ORIENTED JJ
POYNER NNP
OBSERVATIONS NNS
LONG-DATED JJ
859.2 CD
ONCE-BALKANIZED JJ
EPSIODE NN
859.5 CD
RE-ENTERED VBD
REKINDLE VB
MCKIM NNP
COPPER-BASED JJ
GENERAL-INTEREST JJ
SHOWALTER NNP
WHITBREAD NNP
DOMINANT JJ NNP
IMPERSONATIONS NNS
BERLITZ NNP
97.275 CD
CASUALLY RB
GENERATIONS NNS
8,524 CD
AMBITIONS NNS
HYPERTENSION NN
PENCILS NNS
PROZAC NNP
CONQUEST NN
NOMINALLY RB
POSIX NNP
96.808 CD
TRANSLUSCENT JJ
DECIDEDLY RB
779.8 CD
STICKS VBZ NNS
NON-AUTO JJ
THE'BREAKUP NN
SHORT-RUN JJ NN
STICKY JJ
KIMBERLY-CLARK NNP
FUNDAMANTALIST NN
CAMPBELL NNP
525.8 CD
DISCIMINATION NN
MUSES VBZ NNS
PSYCHIATRY NNP NN
123,000 CD
CANTO NN
28.375 CD
AMENDMENT NN NNP
PHILLIES NNP
GM-JAGUAR JJ
RELATION-BACK JJ
8,550 CD
INTONES VBZ
APPEASED VBD
POST-GAME JJ
LEUKEMIA NN
MEESE NNP
CAST-IRON NN JJ
BARREL-A-DAY JJ
SUCCASUNNA NNP
MASCARA NN
RAE NNP
256,000 CD
RAG NN
TOXICS NNP
REMOVABLE JJ
GARFIELD NNP
PRO-ENTERPRISE JJ
XANAX NNP
RAM NNP
RAN VBD
BELFAST NNP
445.7 CD
RAP NN
POSSIBILITIES NNS
PIRANHA NN
NONDAIRY JJ
EIGHT-PIECE JJ
RAT NN VB
SWAINE NNP
RAW JJ
RAY NNP NN
SHILLS NNS
MINIMUMS NNS
INVITED VBN VBD
MATSING NNP
BASEBALL NN NNP
MANIFEST JJ VBP
RBC NNP
MISCREANTS NNS
OVEREXTENSION NN
SOULLESS JJ
MERCIFULLY RB
MEETS VBZ NNS
BOSTONIANS NNPS
NEMETH NNP
INVITES VBZ
UNREALISTIC JJ
DOWNWARD JJ RB
KITCHEN NN
RBS NNP
PRO-REAGAN JJ
DOMINATE VB VBP
PERPETUATES VBZ
ABUNDANTLY RB
INVENT VB VBP
BATON NNP
SOBEL NNP
TOY-STORE NN
MUSHY JJ
SOFITEL NNP
SOBER JJ
CONFRONTS VBZ
PADDLES NNS
BRACE NNP VB
MUSIC NN NNP
SOBEY NNP
SIX-MONTH JJ
7.567 CD
LIGHTENING VBG
BINDAL NNP
EXHIBIT NN VB
CABLEVISION NNP
ALEXANDRA NNP
LEHIGH NNP
BERTRAND NNP
111.2 CD
FORECASTING NN VBG
111.9 CD
RDF NNP
GHANA NNP
8,590 CD
POLITICAL-CORRUPTION NN
LAFONTANT NNP
AMBITIOUS JJ
BICYCLES NNS
JARVIS NNP
SNOTTY JJ
SECOND-CONSECUTIVE JJ
BRADY NNP
ENDEAVOR NN VB
ACTON NNP
VIBRANT JJ
VENAL JJ
ACTOR NN
REC NN
RED JJ NNP NN
TRAVEL-RELATED JJ
PIZZAS-WITH-EVERYTHING NNS
INHERENT JJ
BUILDING-MATERIALS NNS
INMATE NN
HIGH-STANDARD JJ
BAILIFFS NNS
KUMBLE NNP
DISSENTED VBD VBN
CONTEL NNP
CASUALTY NNP NN
REP NNP NN
HIGH-INCOME JJ
RECEPTION NN
UNJUSTIFIED JJ
CLARIFY VB
BIOLOGIST NN
REX NNP
REY NNP
DISSENTER NN
EUBANK NNP
MANVILLE NNP
MAGURNO NNP
SLOBODIN NNP
IMPLICITLY RB
MARKET-WEIGHTED JJ
NAPHTHA NN
MASS-MERCHANDISE NN
JOSEPHINE NNP
MEMOIR NN
LYMPH NN
MAC-LAREN NNP
AUSTIN NNP
THOROUGHLY RB
MEMORIAL NNP NN
AIRLINE-INTERIOR JJ
TRIPLE-A JJ NNP
TRIPLE-B JJ
TRIPLE-C NN
EARNINGS-LIMIT JJ
BRAGG NNP
FLURRY NN
S&L NN NNP
MCINTOSH NNP
SORTING VBG
HORRENDOUS JJ
S&P NNP NN
EHMAN NNP
WHITE-COLLAR JJ
LOUDER RBR JJR
BRAGS VBZ
INTERNATIONAL\/DIVERSIFIED JJ
NON-TARIFF JJ
BINDER NN NNP
PROCEDURALLY RB
INVEST VB VBP
HIGH-MINDED JJ
YIELD-MANAGEMENT NN
PREREQUISITE NN
INEFFICIENT JJ
THROWAWAY JJ
INTERSECTIONS NNS
FRAMEWORK NN NNP
PREFERRED-STOCK JJ NN
LATE-DAY JJ
POSTS NNS VBZ
IPOS NNS
YANKED VBD VBN
RIB NN
YANKEE NNP NN
RID JJ VB VBD VBN VBN|JJ
RIG NN
LAYMAN NN
6.00 CD
6.02 CD
HEITMAN NNP
6.03 CD
RIM NN VBP NNP
6.05 CD
PRE-EMPT VB
RIO NNP NN
6.07 CD
BRAIN NN
6.08 CD
WEAPONS-MODERNIZATION JJ
6.09 CD
BLADDER NN
800-NUMBER NN
MAHATHIR NNP
RIT NNP
TOMKIN NNP
BLONDE JJ
GROUPED VBN
VICTORIOUS JJ
DEFAMATION NN
LITHIUM NN
DAIEI NNP
CECIN NNP
6.10 CD
FILLING VBG NN
CONSONANTS NNS
6.11 CD
PHASING VBG
OUTPACING VBG
6.15 CD
6.16 CD
6.18 CD
INDEX-TRADING NN
HOMERS NNS
RJR NNP
6.19 CD
MATHEMATICALLY RB
ALCATRAZ NNP
SEPARATE JJ VB VBP
VERSICHERUNG NNP
WATCH VB NN VBP NNP
JEWEL NN NNP
VISITED VBD VBN
11150 CD
KIRGHIZ NNP
SHERBLOM NNP
SUMMONING VBG
MEMORIES NNS NNP NNPS
FORMULATIONS NNS
CRUMBLING VBG
EXONERATING VBG
REBUILDING VBG NN
PHILLIPS NNP NNS
BRAKE NNP
RUNWAY NN
TRACINDA NNP
SIERRA NNP
6.20 CD
CECELIA NNP
IRISH-SOVIET JJ
ILLUMINATES VBZ
CROAKER NN
6.21 CD
MONIESON NNP
BEERMANN NNP
6.22 CD
ELECTRONICS-PRODUCT NN
6.23 CD
6.24 CD
6.25 CD
6.26 CD
6.27 CD
LEVINSON NNP
UNCONVINCING JJ
MOLLIFIED VBN
INSTANCE NN
NOTIFYING VBG
VOICE-ACTIVATED JJ
ONCE-STATELY JJ
MISSISSIPPI NNP
BORN-AGAIN JJ
SUBSIDIARY NN JJ
SCREWBALL JJ NN
COLLECTIONS NNS
UNHEARD JJ
RECEPTIVE JJ
6.30 CD
CRITICISM NN NNP
6.31 CD
6.34 CD
ENGINEERING NN NNP VBG
6.35 CD
SHRINKING VBG NN
6.36 CD
DOUGHNUT NN
HYPOTHEEKKAS NNP
OVERTLY RB
FINAL-HOUR JJ
DEMOCRATIZE VB
LAUDABLE JJ
GAULLE NNP
AICHI NNP NNS
O'DONNELL NNP
WATER NN NNP VB
44.1 CD
PUBLICITY-SEEKING JJ
RMI NNP
6.40 CD
44.2 CD
166,537 CD
44.3 CD
6.43 CD
44.5 CD
UNDERPERFORMS VBZ
PUFFED-UP JJ
6.44 CD
44.6 CD
6.45 CD
44.7 CD
6.46 CD
12-DAY JJ
6.47 CD
44.9 CD
DISASTER-PRONE JJ
DETECTIVES NNS
RMS NNP
WELL-REHEARSED JJ
TREMENDAE NNP
34-A-SHARE JJ
OLDER JJR NNP
DIVESTITURE NN
KYSOR NNP
DABS VBZ
RECORDING NN VBG NNP
RNA NNP
LAKSHMIPURA NNP
WONDERMENT NN
SEXPOT NN
STRAM NNP
BRAND NN NNP
CLARION NNP
COMPULSION NN
6.50 CD
6.51 CD
INTRIGUED VBN
6.52 CD
6.53 CD
6.55 CD
6.56 CD
6.59 CD
STRAY VBP VB JJ
HAULERS NNS
THINKER NN
INSTRUCTIONS NNS
COUNTERPROGRAM VB
KINDERCARE NNP
LITCHFIELD NNP
LOUDLY RB
INTRIGUES NNS
INDICTMENTS NNS
ADVANTAGEOUS JJ
S.A NNP
ROB NNP
S.C NNP
ROD NN NNP
SAMNICK NNP
ROE NNP
4400 CD
PRE-COOKED JJ
ROH NNP
BUTTONED-DOWN JJ
DADA NN NNP
6.61 CD
6.62 CD
6.63 CD
DADE NNP
RON NNP
6.65 CD
6.66 CD
S.P NNP
6.69 CD
ROT NN
MEAD NNP NN
SOCIOLOGY NN
VISION NN NNP
ROW NN VB NNP
1,816,000 CD
MEMORY NN
ROY NNP
BEIGE JJ NNP
MEAL NN
MEAN VB VBP JJ NN
SARDINA NNP
DISCARDED VBN VBD
LAWNS NNS
2.15-PER-UNIT JJ
BOLLING NNP
MEAT NN NNP
HUNTLEY NNP
PROGRAMS NNS NNP
6.70 CD
ABOUNDS VBZ
6.71 CD
6.74 CD
TRAPPED VBN JJ
6.75 CD
MCCAFFREY NNP
UPPER-LEVEL JJ
KRONER NN
CATASTROPHES NNS
MUGABE NNP
6.76 CD
SALERNO-SONNENBERG NNP
6.79 CD
SHELTERING VBG
HOPPING VBG
SCHREIBMAN NNP
BULK-MAIL NN
MALFUNCTION NN
EMBARRASS VB
ANTI-LOCK JJ
AMPUTATION NN
SNAPSHOTS NNS
38,000 CD
RE-EXAMINE VB
6.80 CD
AWARDING VBG NN
6.81 CD
6.84 CD
TERRITORIAL NN
6.85 CD
EAGLES NNPS
CROSSED VBN VBD
DAILY JJ NNP RB NN
AZERBAIJAN NNP
PENNED VBN
100%-OWNED JJ
DEPLOYABLE JJ
CROSSES VBZ
REASSIGNMENTS NNS
CONSTRUCT VB
FOUR-ROOM JJ
10-MEMBER JJ
CONTRA NNP JJ
NONCONTRACT JJ
6.90 CD
RETRENCHMENT NN
PENNEY NNP NN
6.94 CD
6.95 CD
6.96 CD
6.97 CD
6.98 CD
6.99 CD
35133.83 CD
SHRUGGED VBD
BORROW VB VBP
FOSTERED VBD VBN
INCORPORATING VBG
SITCO NNP
LATE-IN-THE-DAY JJ
MID-NOVEMBER NNP
CRITICIZE VB VBP
CONSOLES VBZ
VIAL NN
DOCKETS NNS
BRASH JJ
WHEATIES-BOX JJ
MOVINGLY RB
RESPECT NN VB
CONSTRUED VBN VBD
CLARITY NN
DAHL NNP
BRASS NN
DISCOURAGING VBG JJ
TYMNET NNP
MEEK NNP
97.25 CD
3.5-INCH JJ
CATASTROPHIC JJ NNP
BANNERS NNS
RTC NNP
AFFILIATED VBN JJ NNP
CARDHOLDERS NNS
MEET VB VBP NNP
EUROPA NNP NN
FULL-RANGE JJ
EUROPE NNP
ATARI NNP
CONSONANT JJ
ILLUMINATE VB
CENTRIFUGAL JJ
9,000 CD
CLANAHAN NNP
AFFILIATES NNS NNP
ABOUND VBP
RTS NNP
AIRLINE-ACQUISITION JJ
VOIDED VBN
379.46 CD
DAIM NNP
MARUNOUCHI NNP
BRATS NNS
DAIN NNP
RTZ NNP
VISITS NNS VBZ
COOPERATE VB VBP
TRAPPING VBG
COMPULSIVE JJ
VICE NN NNP RB FW
SITES NNS
RUB NN VBP VB
CONFIDANTS NNS
BUCHWALD NNP
RUE NN
JAGUARS NNPS
RUG NN
VISITOR NN
2:07 CD
RUM NN
RUN VB VBN NN VBP VBD NNP
KIKKOMAN NNP
AUTO-MAKER NN
OBERMAIER NNP
1982-1984 CD
BRAUN NNP
MEGA JJ
TERRITORIES NNS NNPS
INGRATES NNS
SYMBOLIZED VBN
EVER-ANXIOUS JJ
WINDSOR NNP
ELIANTI NNP
EMERGENCIES NNS
MAGNIFY VB
RUBBER-NECKING VBG
SHIPPERS NNS NNP
BRAVE JJ VB NNP
SYMBOLIZES VBZ
STRIP NN NNP VB
MISADVENTURE NN
700.2 CD
9,023 CD
BRAVO NNP
RVS NNS
BUNDY'S NNP
8.007 CD
UNUSABLE JJ
AGILE FW
CONFAIR NNP
BEING VBG NN JJ VBG|JJ
JUTTING VBG
MEHL NNP
COMPUTING-SERVICES JJ
THRASHING NN VBG
MEANEST JJS
INCUMBENCY NN
REINSTATE VB
CO-HEAD NN
CENTRALIZE VB
COMPUTER-AIDED JJ
2:25 CD
ANSCO NNP
TUGGING VBG
WARSAW NNP
DALE NNP
PHILOSOPHIES NNS
DOWNPLAYED VBD
CAFETERIAS NNS
WRACK VBP
BRAWL NN
VIET NNP
DAIRY NN
PERTSCHUK NNP
DALI NNP
VIEW NN VBP VB NNP
CREW-REST NN
8.019 CD
LANZHOU NNP
SHIPBUILDING NN NNP
97.65 CD
DALY NNP
29,400 CD
VENTO NNP
GIGGLE NN
2:30 CD
GOODS-PRODUCING JJ
532,000 CD
DAME NNP
PROPONENTS NNS
DAISY NNP
620.5 CD
CONGRESSIONALLY RB
DAMN RB JJ NN UH
DAMP VB JJ VBP
DAMS NNS
97.70 CD
DIPLOMA NN
COOPERATED VBD VBN
AGING VBG NN
CAVEATS NNS
MACARTHUR NNP
TOAD NN
97.74 CD
97.75 CD
REACTIVATED VBD VBN
MORE-MUSCULAR JJ
SUBPOENAS NNS
RYE NN NNP
VENUS NNP
2:43 CD
BRAYE NNP
GARTNER NNP JJR
DANA NNP
7.0808 CD
2:45 CD
DONOGHUE NNP
DANG NNP
YANKUS NNP
8.032 CD
VACATIONERS NNS
DISBURSED VBN
TRANSFORMERS NNPS
ENGAGED VBN VBD JJ
QUESTIONS NNS VBZ
97.85 CD
FERDINAND NNP
MISFORTUNE NN
EARTHWORMS NNS
DOMINGO NNP
PHILOSOPHICAL JJ
BAUER NNP
TREATMENT NN NNP
STYLISHLY RB
VICAR NN NNP
2:54 CD
TRAPPIST JJ
ENGAGES VBZ
KRONOR NNS NN
HALOGENATED VBD
LYNCH NNP
540.9 CD
WAKING VBG
MELD VB
ASSESSMENT NN NNP
AIRBUS NNP
GRABBED VBD VBN
UH-UH UH
NON-ANSWER NN JJ
CAPETRONIC NNP
SHRIEVES NNP
89.75 CD
SEMI-PROFESSIONAL JJ
MELT VB
256.18 CD
7.0826 CD
REPASSED VBN
PROCLAMATIONS NNS
FLAVORS NNS
THROWERS NNS
LOWER-THAN-EXPECTED JJ
IGNITE VB
FOODSTUFFS NNS
COMPLAINS VBZ
DAIWA NNP NN
COMPLAINT NN
BEISE NNP
HANDILY RB
CRUMBLE VB
PICKLES NNS
TODD NNP
MEMO NN
STROH NNP
DISCLOSURES NNS
FIRINGS NNS
CONCRETE JJ NN
WATTS NNP NNS
STROM NNP
SMALL-LOT JJ
TRAPPINGS NNS
POSSESSED VBD VBN
TODT NNP
ZACKS NNP
495,000 CD
RADAR-THREAT JJ
SLEAZE NN
MEND VB
24-YEAR JJ
PERFORMERS NNS
MACINTOSH NNP
PSYCHOLOGIST NN
POSSESSES VBZ
JUNK-MAIL NN JJ
LIPSTEIN NNP
TEUTONIC JJ
EVALUATIONS NNS
LYNES NNP
AMAZINGLY RB
ALYCE NNP
MARCHED VBD VBN
ARGUE VBP VB
36.625 CD
LAWSON NNP
MENT NNP
MENU NN
UMKHONTO NNP
PORTRAIT NN
SLEAZY JJ
TOES NNS
RODRIGUEZ NNP
DARE VB VBP MD
6-TO-8-FOOT-HIGH JJ
HEREDITY NN
SESAME NNP
NARRATIVES NNS
ARGUS NNP
DARK JJ NN NNP
MARCHES NNS
FLEETS NNS VBZ
HAMPERED VBN VBD
HERSCU NNP
GNAWING NN
DART NN
MARCH NNP NN VB VBP
VILA NNP
OBLITERATED VBN
D'ALENE NNP
MORISHITA NNP
STIMULATING VBG JJ
POPKIN NNP
INEFFICIENCIES NNS
ENTRANCED VBN
OBSERVE VBP VB
45-A-SHARE JJ
VICES NNS
RESTAURANTS NNS NNP NNPS
MARCY NNP
ANCHORWOMAN NN
HOME-SHOPPING NN
VA-BACKED JJ
ASIANS NNPS
COUNCILS NNS
DASH NN NNP VB
MINTED VBN
3393.51 CD
FREE-SPEECH NN
TOGA NN
UNISYS NNP
DASS FW
IMPROMPTU JJ
CHEMIST NN
SZANTON NNP
DISTRIBUTABLE JJ
CONVENTIONAL JJ
YEAR-END NN JJ RB
HUMAN-GENERATED JJ
STODDARD NNP
WELL-STRUCTURED JJ
SCIENTIST NN
LOST-PROFITS JJ
237-SEAT JJ
DE-STOCKING NN
STIMULATION NN
SIDESTEPPED VBD
TRIDENT NNP
DATA NNS NNP NN NN|NNS NNS|NN NNPS
WIDE-SCALE JJ
DATE NN VB VBP
MESOTHELIOMA NN
MEMORIZE VBP
KEEPERS NNS
PATTER NN
HERSEY NNP
VINE NN
28.461 CD
WEISMAN NNP
ARIGHI NNP
HEBERT NNP
TAX-DEFERRED JJ
RUBS VBZ NNS
526.2 CD
526.3 CD
MUTED JJ VBN
BATTLEFIELD NN
MORTGAGED-BACKED JJ
RUBY NNP
7.625 CD
EARLIER-EXPRESSED JJ
PRAGUE NNP
NONPERFORMING JJ VBG NN
INSTITUTIONAL-TYPE JJ
MERC NNP
MERE JJ
BALLWIN NNP
AGGRAVATING JJ VBG
THREE-MONTH JJ
SENATORS NNS NNP NNPS
ONE-STOP JJ
WFAA-TV NNP
DETERMINING VBG
TUMULTUOUS JJ
FRANCHISED JJ VBN
TOIL VBP VB
FRANCHISEE NN
CALIF.-BASED JJ
REQUISITION NN
DAVE NNP JJ
JOLTED VBD VBN
VICHY NNP
ABSENCES NNS
FRANCHISER NN
TRIFLE RB
PHOBIAS NNS
FRANCHISES NNS VBZ
MESA NNP
SYNDICATED VBN JJ
3377.43 CD
CELEBRATED JJ VBD
AMIABLE JJ
MARGE NNP
MESH VB NN
RUDE JJ NNP
WOEFUL JJ
EXASPERATION NN
RUDI NNP
DAVY NNP
GOLAR NNP
CARVERS NNS
BIMONTHLY JJ
MARGO NNP
SAC NN
SYNDICATES NNS
SAD JJ
MESS NN VB
C.J.B. NNP
CELEBRATES VBZ
STRUM NNP
767-300ER NNP
SURROGATE NN JJ
BUSTING VBG
U.K. NNP NN
PERSONAL-COMPUTER NN
SAM NNP
446.5 CD
INVESTED VBN VBD
SAN NNP JJ NNS
SAO NNP
SAP VB
WILSHIRE NNP
SAS NNP
META NNP
SERVE-THE-WORLD JJ
GOVERNMENT-CONTROLLED JJ
SAT VBD VBN NNP
7.649 CD
WRECKAGE NN
CONFIRMATION NN
DAWN NN
SAW VBD NN
BENEFACTORS NNS
NOTEBOOK-SIZED JJ
SAY VBP VB NN UH NNP
FORM-LETTER NN
YUKIO NNP
SUBSEQUENTLY RB NNP
UNINHABITABLE JJ
SBA NNP
SULTAN NN NNP
44.875 CD
UNRAVELING NN VBG
BRISTOL-MYERS NNP
SUMMER\/WINTER JJ
CEDAR NN NNP
COMMUNICATIONS-NETWORK JJ
METZ NNP
WORKING VBG NNP NN JJ VBG|NN
GRINEVSKY NNP
FINANCIAL-SERVICE JJ
LENGTHENS VBZ
FORECLOSURE NN NNP
WELDING NN
MARIA NNP
MARIE NNP
40-MILLION-TON-A-YEAR JJ
TOLD VBD VBN
NERVES NNS
ETHIOPIA NNP NN
WEIGH VB VBP
CONCERTED JJ
MARIN NNP
MARIO NNP
SOFT-SPOKEN JJ
TELESIS NNP
TOLL NN
EVANGELICAL JJ
SCI NNP
WENHAM NNP
JENRETTE NNP
EXPLICIT JJ
SOON-TO-BE JJ
ECCENTRICS NNS
DEREGULATION NN
2-FOR-1 JJ
VICKY NNP
141.33 CD
DEFINITIVELY RB
141.35 CD
WRAPS VBZ
CRETACEOUS JJ
KYOCERA NNP
OFF-SEASON NN
MEAT-HUNGRY JJ
DAYS NNS NN NNPS
TOMB NN
TERRAIN-MARRING JJ
PREDECESSORS NNS
MEASURE NN VB
PURPOSELY RB
VISA NNP NN
112.2 CD
SECOND-HIGHEST JJ
248.91 CD
KAWASAKI-RIKUSO NNP
112.5 CD
PRACTICALLY RB
GOLDS NNS
ENTERPRISING JJ
112.9 CD
REGAINED VBD VBN
U.N. NNP
SDI NNP
RUGS NNS
POLLINATING VBG
FOOD-SAFETY JJ
TOMS NNP
DAZE NN NNP
NARROWEST JJS
SUMMERFOLK NNP
LYNNE NNP
TUSTIN NNP
141.45 CD
CAROLINIANS NNPS
WICKLIFFE NNP
TONE NN
STIMULATIVE JJ
TONG NNP
SCHOCH NNP
SSANGYONG NNP
SEA NNP NN
TONI NNP
THEORY NN NNP
SEC NNP
PROPENSITY NN
SEE VB VBP NNP
MARKS NNS VBZ NNP
TAX-PREPARATION NN
LICKING VBG
BRAUER NNP
TONS NNS
286.6 CD
SEN NNP
286.8 CD
TALENT NN
CHARISMA NNP NN
POLLINATION NN
141.50 CD
TONY NNP JJ
SES NNP
141.52 CD
SET VBN VB VBD NN VBP JJ
DENIAL NN
141.55 CD
SEW VB
BANCROFT NNP
SEX NN
141.57 CD
HATCHED VBN
HABERDASHERY NN
VIABLE JJ
CEDED VBD VBN
SOCHI NNP
BRUWER NNP
HERSLY NNP
FORTUNATE JJ
DETERIORATE VBP VB
THEN-CLIENT NN
GOLFS NNS
MARLO NNP
TOOK VBD NNP
AIDAN NNP
RUIN VB VBP
EYEBALL NN
TOOL NN NNP
SFE NNP
CYNWYD NNP
DISARM VB
HATCHET NN
INDIFFERENCE NN
VISITORS NNS NNPS
FIRST-YEAR JJ
RACCOON-SKIN JJ
COUNTERBALANCED VBN
RUIZ NNP
141.60 CD
ENSURING VBG
HUEGLIN NNP
POORER-QUALITY JJR
ALJIAN NNP
141.65 CD
FRUITFUL JJ
SFX NNP
OUTGROWTH NN
BANKRUPTCY-LAW NN JJ
VIVA FW
BHUTTO NNP
ARTERY NN
STEHLIN NNP
INCUMBENTS NNS
FORTUNATELY RB
DOMINUS NNP
SITCOMS NNS
MAJESTICALLY RB
ZAISHUO NNP
PRINTING-PRESS NN
TOPS NNS VBZ
WRATH NN
NARCOTRAFICANTES FW
PROCESSED VBN JJ VBD
DOWN-TO-EARTH JJ
SACKED VBD
141.70 CD
ACURA NNP
CO-HERO NN
LURING VBG
YUKON NNP
REVERSALS NNS
PROCESSES VBZ NNS
MARNI NNP
122,700 CD
PROMINENT JJ
FAGERSHEIN NNP
WEILL NNP
SHE PRP NN
ADENOCARD NN
STRONACH NNP
SUBSIDENCE NN
CONSTERNATION NN
U.S.-MADE JJ
FIREWATER NN
CONSIDERS VBZ
141.80 CD
ATWOOD NNP
SHU NNP
HIGHEST-VOLUME JJ
SHV NNP
141.85 CD
DOMINGUEZ NNP
EXTERIOR NNP
SHY JJ VB VBP
RULE NN VB VBP NNP
TORE VBD
POTTS NNP
ACCEPTANCES NNS NNPS
SNOWSTORM NN
SERPENTINE JJ
RELATE VBP VB
SIA NNP
ABORTION NN NNP
11,000 CD
SID NNP
CARBALLO NNP
FORAY NN
TORN VBN JJ
SOCKS NNS
FRONT-SEAT NN
U.S. NNP JJ VBP
SIK NNP
TORT NN NNP
SIM NNP
DENIED VBD VBN
SIN NN NNP
INCOMPETENTLY RB
141.90 CD
TORY NNP
SIR NNP
SIS NNP
OLEAN NNP
IDRISSA NNP
SIT VB VBP NNP
141.93 CD
MAANEN NNP
JEOPARDIZED VBN
ACUTE JJ
141.95 CD
TOMLIN NNP
SIX CD
AIDED VBN VBD
DENIES VBZ
ELBOW NN
CHICAGO-BASED JJ
JEOPARDIZES VBZ
COMING-OUT JJ
ADOLESCENT NN JJ
BLOODS NNS
AIDES NNS
HEINEKEN NNP
TOSS VB
BLOODY JJ
UNITED NNP VBN JJ
TANNENBAUM NNP
183,467 CD
FRANCHISOR NN
109.25 CD
EVEREX NNP
FORCE NN VB NNP VBP
ANTAGONIZE VB
TISSUE-TRANSPLANT JJ
UNITEL NNP
SACREMENTO NNP
-0.06 CD
CONFIDING VBG
COMPRESSED VBN
UNITES VBZ
SPACE-BASED JJ
SKOAL NNP
RUNE NNP
SKETCHY JJ
TOTE VB
RUNG VBN
STAPLES NNP
LEAGUE-SPONSORED JJ
UNIVERSALLY RB
OHLMAN NNP
SYNDICATOR NN
NEDERLANDEN NNP
SKF NNP
TOTO NNP
SKI NN JJ VB NNP
RUNS VBZ NNS
GRIMNESS NN
COMMANDERS NNS
CRAVATH NNP
TOTS NNP NNPS
HAMBRECHT NNP
DISPARAGE VB
HOUSINGS NNS
DOUBLE-BREASTED JJ
PETERPAUL NNP
UMBRELLA NN
BANANAS NNS
HEALTHIER JJR RBR
SKY NN NNP
CRUSADER NNP NN
INVESTOR NN NNP
MANDATED VBN VBD
RAFALES NNPS
DECKED VBN
COMMERCIALLY RB
BENEFICIARY NN
REACTS VBZ
NON-SOCIALIST JJ
PORTRAYS VBZ
KADDURAH-DAOUK NNP
SELF-DESTRUCTIVE JJ
TOUR NN VB
MARRY VB
TOUT VB
MANDATES VBZ NNS
ANTOINE NNP
DECKER NNP
TIMES-STOCK NNP
ENTHUSIASMS NNS
FLAT-ROLLED JJ
SLY JJ
PYRAMID-SHAPED JJ
MARSH NNP
PUCIK NNP
REFASHIONING VBG
PROPERLY RB
OVERTURF NNP
UNFRIENDLY JJ
FORET NNP
VIOLENT JJ
THEN-HUSBAND NN
CRUISING VBG
WHITTLED VBN
OVERTURN VB
1\/2-WEEK JJ
TEMPTING JJ
45.2 CD
45.3 CD
45.4 CD
MAINTAINENCE NN
109.50 CD
WE-JAPANESE JJ
CONCERTOS NNS
71,309 CD
CURTAIL VB VBP
SMU NNP
OPPOSE VBP VB
CURTAIN NN NNP
MACHON NNP
CALLING VBG NN
WEIRD JJ
STRATAGEMS NNS
NOVELLO NNP
SCHOOL-RESEARCH JJ
EXCURSUS NN
WEEDON NNP
THEN-VICE JJ NNP
CONDITIONING NN
ATHERTON NNP
HAMBURG NNP
WALTANA NNP
TOWN NN NNP
TOWS NNS
MARTY NNP
UPSET VBN JJ VB NN VBD
FORGE VB NNP
109.66 CD
PREFECTURE NN
UNITIL NNP
KARNAK NNP
EVERYBODY NN
MUTTS NNS
FORGO VB
BYLER NNP
IBM-ORIENTED JJ
LANDSLIDES NNS
SOB VB
DISCONTINUE VB
STEEL-RELATED JJ
WEISS NNP
AUDITORS NNS
SOL NNP
DELOITTE-TOUCHE NNP
SON NN NNP
SOO NNP
TRAVEL-AGENCY NN
109.73 CD
TRACKING VBG NN NNP
117.94 CD
SOW VB VBP
SMILE NN VBP
SOX NNP NNPS
FRAMINGHAM NNP
SOY NN
CREDENTIAL NN
BAGHDAD NNP
ABORTIVE JJ
CAMBRIDGE NNP
DUBLIN NNP
RUSE NN
CURBS NNS
RUSH NN VB VBP NNP
1-MILLION-PLUS JJ
SPA NN NNP
SLIPPING VBG
SHUFFLING NN VBG
SCALED-BACK JJ
TOYO NNP
RUSS NNP
KERRY NNP
RUST NNP
TOYS NNS NNPS NNP
PERCEIVE VBP
WEITZ NNP
109.85 CD
KATHIE NNP
WORKER-COMPENSATION NN
NOTORIOUSLY RB
PROSPECTUS NN
ORGANIZING VBG NNP NN
68-YEAR-OLD JJ
GORTARI NNP
ANTIBODY NN
BOLSTER VB
DAVIDS NNP
SPY NN NNP VB
COURTYARD NN
BANISHED VBN
RUTH NNP
DUCKING VBG
DISBELIEF NN
SCHOOL NN NNP VB
PUMPED VBN VBD
4525 CD
SR. NNP
HIGH-HEELED JJ
IGARAS NNP
LUZON NNP
DAVIES NNP
NIGHTMARISH JJ
166,900,000 CD
PROCESSOR NN
DENIMS NNS
CENTURY-FOX NNP
CAPEL NNP
FINE-ARTS NNS
BARGAIN-HUNTERS NNS
BEER-RELATED JJ
EIGHT-TIME JJ
SRI NNP
PLAYOFF NN
CONVOYS NNS
CURED VBN
VASOTEC NNP
PHASE-OUT NN
CHAINS NNS
13-POUND JJ
CENSURED VBD
CONFESSED VBD VBN
ELECTORAL JJ NNP
CALCULATORS NNS
P\/E NNP
CURES NNS
RESHUFFLE VB NN
WHITLEY NNP
OVERUSE NN
CONFESSES VBZ
BALTIMORE-WASHINGTON NNP
SSI NNP
CLUBBED VBD
FASCINATED VBN
DIVISIONAL JJ
COLOMBATTO NNP
ST. NNP
PADGET NNP
WRITEDOWNS NNS
RAGING VBG
SST NNP
ENTHUSIASTS NNS
CREVASSE NN
HAND-LOTION NN
TIERNEY NNP
DECISIVENESS NN
PROTESTANTS NNPS
NAME-CALLING NN
8%-10 CD
1\/2 CD
1\/4 CD
LAND-RICH JJ
UTILITY NN NNP
1\/8 CD
FORMA FW
SUPER-EXCITING JJ
PUMMELED VBD VBN
MINERALS NNS NNPS NNP
BHD. NNP
QUIRKS NNS
LOCKHEED NNP
EMASCULATE VB
QUIRKY JJ
PROPERTY NN NNP
ATS\/2 NNP
FORMS NNS VBZ
FOOTWEAR NN
MFG. NNP
ALL-STOCK JJ
ADVANCING VBG
SUE VB
SUH NNP
PENNIES NNS
EMBLEMATIC JJ
CO-SPONSOR NN VB
FORMALDEHYDE NN
1986-87 CD
DEPARTMENT NNP NN
SUM NN VB
SUN NNP NN
ANTAR NNP
LEGITIMIZED VBN
BLAMING VBG
SIGNAL NN VB NNP VBP
9,118 CD
UNOCAL NNP
STRAPPED VBN JJ VBD
CRUNCH NN VB
EATERS NNS
DERIVATIVES NNS
KLAN NNP
SHOPPING NN VBG NNP
HOSTILITY NN
TRINITRON NNP
CONTRADICT VB
ALLIGOOD NNP
REINING VBG
OVONIC NNP
NOVELTY NN
ALWAYS RB NNP
ADVANCE NN VB JJ NNP VBP
ACCUSERS NNS
CHAIRS NNS VBZ
198,120,000 CD
SUPERCOMPUTER NN
EQUIMARK NNP
MORIBUND JJ
35549.44 CD
DISTRIBUTED VBN VBD
LUKASSEN NNP
CROSSING VBG
FERROELECTRIC JJ
CROSSLAND NNP
EXPECT VBP VB IN
DERRING-DO NN
DISLOCATIONS NNS
CHAISE NN
CONVENTION-GOERS NNS
DISTRIBUTER NN
DISTRIBUTES VBZ
ANTI-SOCIAL JJ
DENISE NNP
CLAYTON NNP
ZAYADI NNP
UNTRUE JJ
MENTAL-HEALTH NN JJ
SMITH NNP
NAMED VBN VBD
WORRISOME JJ
FERGUSON NNP
MANZANEC NNP
REFEREES NNS
UNDEAD NN
CINZANO NNP
REFURBISHED VBN
NAMES NNS VBZ NNPS
UNNUMBERED JJ
BYLINES NNS
PROXMIRE NNP
DISPARATE JJ
CONVEYED VBD
8.125 CD
JAWBONING NN
OPERATORS NNS NNP
879,000 CD
GWYN NNP
6\/32 CD
150-PLUS JJ
JUDITH NNP
CLANDESTINE JJ
QUOTRONS NNPS
ANDERSSON NNP
DC-9 NNP
SYB NNP
GARMENT NN NNP
AFFIRMING VBG
NEARS VBZ
SIGNED VBD VBN JJ
CLEOPATRA NNP
CLUTCHING VBG
ORGANIZATIONAL JJ
RESELLING VBG
UTILIZE VB
TILTED JJ NNP VBN
LESSENING VBG
WEAPON NN NNP
SIGNET NNP
ARRAIGNMENTS NNS
HOGAN NNP
FLARED VBN
CURLY JJ
SOLICITATION NN
CRYSTALS NNS
JAMIESON NNP
COUNTERCLAIMS NNS
IMPERIOUS JJ
CONSOMME NN
LAPTOPS NNS
UNWANTED JJ
PRECINCTS NNS
LAUNDER VB
68,230,000 CD
REAPPRAISE VB
UNFAZED JJ VBN
ADEQUATELY RB
140,000 CD
DUST-UP NN
DROVES NNS
CHAMPIONED VBD VBN
STRICT JJ
RATIONALIZING VBG
BEDEVIL VB
HAMMERSTEIN NNP
FORTE NNP
PLANT-EXPANSION JJ
FORTH RB
WASTE-TREATMENT NN
VIVIDLY RB
MEDICAL-PRACTICE NN
NAMIB NNP
IRAN NNP
STRIDE NN
IRAQ NNP
USUALLY RB
IRAS NNS NNPS
KLEINMAN NNP
HAWTHORNE NNP NN
VITREOUS-CHINA NN
35442.40 CD
FORTY CD
FORMALITY NN
273,000 CD
JESPERSON NNP
YESTERDAY NN RB NNP
461.1 CD
8,700 CD
LOSS-RECOVERY JJ
461.6 CD
461.9 CD
JOANNIE NNP
WHICHEVER WDT
DELORS NNP
FORUM NN NNP
62,372.95 CD
INCORRECTLY RB
RECTIFIED VBN
QIZHEN NNP
NEAVE NNP
TISSUES NNS NNPS
EXPIRED VBD VBN JJ
NAME-DROPPING NN NNP
SPECULATIVE-GRADE JJ
LAWTON NNP
ECOLOGICALLY RB
POPULARITY NN
LIARS NNS
RECTIFIER NNP
EXPIRES VBZ
ANTI-JAPANESE JJ
PROSOMA NN
ACCOMMODATED VBN
UNPUNISHED JJ
GUTERMAN NNP
LOCKMAN NNP
EXCLUSIONARY JJ
CYPRUS NNP
MALIZIA NNP
MELLING NNP
HERITAGE NNP NN
HORRIBLES NNS
TECHNICAL JJ NNP
STRIFE NN
TRANSFUSIONS NNS
RANSOM NNP NN
PROVIDING VBG
READER NN NNP
DESIGNEES NNS
VIDEO NN NNP JJ
CONDITIONALLY RB
REORGANIZED VBN
BEECH-NUT NNP
DISPUTADA NNP
POCKMARKED VBN
CAPRA NNP
REORGANIZES VBZ
ONCE-CLOSED JJ
DISPUTADO NNP
SCHEMING JJ VBG
CAPRI NNP
SCHUSTER NNP
NASSAU-SUFFOLK NNP
GRIFFITH NNP
SYNONYMOUS JJ
FORCEFUL JJ
75-YEAR-OLD CD
MOINES-BASED JJ
TASURINCHI NNP
UNCONDITIONALLY RB
TWELVEFOLD JJ
HERDING NN VBG
EXCESSES NNS
WELL-STATED JJ VBN
PONY-TAILED JJ
OMNICORP NNP
OPERAS NNS
148-A-SHARE JJ
BUFFETS NNS
BUFFETT NNP
CURRY NNP VB
CAPT. NNP
XL\/DATACOMP NNP
CONFECTIONERY NN JJ
METAPHORICAL JJ
SODAS NNS
RESPONDENT NN
CURSE NN
BOOSTING VBG
RANGING VBG
INTERRUPTIONS NNS
COPPER NN NNP
GANDHI NNP
DUMBFOUNDED JJ
PROGRESSIONS NNS
MANAGEMENT-SERVICES JJ
INFUSED VBN
RIKLIS NNP
WILLIAM NNP
SCORPIOS NNPS
ASSOCIATING VBG
PERTINENT JJ
MUCH-WATCHED JJ
AMDURA NNP
DISTRIBUTOR NN
COST-EFFICIENCY NN
KIMMEL NNP
STEPHANIE NNP
DOUBLE-A-RATED JJ
IMPLEMENTING VBG
CONVERTED VBN VBD JJ
LIKINS NNP
SAVAGEAU NNP
WAVERED VBD
LIBERA FW
VENERABLE JJ
13-12 CD
TAB NN
ALLDAY NNP
CONVERTER NN
TAD NN RB NNP
TAE NNP
MANGER NNP
FERRANTI NNP
MANGES NNP
TAG NN VB
MOBUTU NNP
353,500 CD
1,325,900 CD
ASSOCIATION NNP NN
SMALL-INVESTOR NN
SUBVERSIVES NNS
INTERMEDIA NNP
TAN NNP
OPTIMISTIC JJ
TAP VB
RUSHFORTH NNP
SANJAY NNP
TAR NN
OSTRAGER NNP
PARTICULARS NNS
CENSOR VBP
POPULARIZE VB
INNOCULATING VBG
PHALANX NN
TAX NN NNP VB
MEDIA-RELATED JJ
HIGHWAY NN NNP
STRIKE NN VB VBP
AIRBORNE JJ NNP
VECTOR NN NNP
DECLINE NN VB VBP
CONVEYOR NN
BELDING NNP
BELTWAY NN NNP
GRAVELY RB
CONUNDRUM NN
NALCOR NNP
ANTON NNP
HIGH-COUPON JJ
VIADUCTS NNS
ENDORSEMENT NN
CURVE NN
POUND NN NNP VB
T-1600 NNP
4-A-BUSHEL JJ
DESTRUCTION NN NNP
LESS-JUNKY JJR
NON-RETAIL JJ
CURVY JJ
ATELIERS NNP
KIDDIES NNS
BLOOD-CELL NN
ANIMOSITY NN
367.1 CD
TCI NNP
DISPARITIES NNS
BRONSON NNP
BLOODLETTING VBG
FROCKS NNS
TCR NNP
STRIDENT JJ
AFTER-HOURS JJ NNS
REVENUE-LOSING JJ
113.2 CD
INTERMEC NNP
WILLIES NNS
DILENSCHNEIDER NNP
TDK NNP
COLORED VBN NNP
COLOURED VBN NNP
RAIDED VBD VBN
RECOVERABLE JJ
ONESELF PRP
OBERHAUSEN NNP
KAI-SHEK NNP
OBOIST NN
MEDVEDEV NNP
BRAVED VBD
GOMEL NNP
LYONS NNP
RAIDER NN
PEELBACK JJ
STRING NN NNP VB
UNSETTLED JJ VBN VBD
EXPERT NN JJ
UNCONTROLLED JJ
IRKS VBZ
TEA NN NNP
LEMON NNP
TED NNP
ESTABLISHING VBG
TEE NN UH
MASKS NNS VBZ
INKING NN
MD-11 NNP
RECONNECT VB
ANADARKO NNP
100-STOCK JJ CD
GOMEZ NNP
BRAVES NNPS
REPUDIATION NN
TEL NNP
TEN CD
WYLIE NNP
RELEGATED VBN
TET NNP
CONVEX NNP
MASSAGES NNS
CONVEY VB VBP
VISKER NNP
OVERBREADTH NN
INVESTMENT-BANK JJ
STOLZMAN NNP
LANZADOR FW
DAY-LONG JJ
IMPLEMENTS VBZ
IMMIGRATION NN NNP
DERIVED VBN VBD
LAGGED VBN VBD
80,000 CD
LOADED VBN VBD JJ
PASCUAL NNP
EXCHEQUER NNP NN
EPILEPSY NNP NN
BUFTON NNP
ANTSY JJ
SPOKEN VBN
HOBBLED VBN
DERIVES VBZ
RELENTED VBD
SAAB-SCANIA NNP
34941.01 CD
SPOKES NNS
STRIPE NN
POURS VBZ
AEROSPATIALE NNP
TAWDRY JJ
LAYER NN
LAUNDRY NN
HOBBLES VBZ
ROJAS NNP
REGENERATE VB
STRIPS NNS VBZ
60.1 CD
60.2 CD
JIMMY NNP
60.3 CD
60.4 CD
60.5 CD
60.6 CD
2117.1 CD
60.7 CD
BICENTENNIAL NN JJ
60.9 CD
SUBLIME JJ
CENSUS NNP NN
ELIMINATING VBG
MONTEREY NNP
DUMBO NNP
BEIJING NNP
WALLINGFORD NNP
INTANGIBLE JJ NN
NEGLECTING VBG
KUTNEY NNP
THE DT NNP JJ VBP NN VB CD
REVIGLIO NNP
VOCATION NN
THI NNP
DECLAN NNP
WAVERLY NNP
BORTEN NNP
SYMPTOMS NNS
THR NNP
TABLETS NNS
KLUC NNP
SCHAUMBURG NNP
JERALD NNP
ODIOUS JJ
10%-12 CD
ORNAMENTS NNS
GLOWING JJ VBG
NUOVO NNP
IRON NNP NN VB
ELIMINATION NN
STEEPNESS NN
INHERITED VBN VBD
GRAVEST JJS
DEMANDS NNS VBZ
EDITORIAL NN JJ
MASON NNP
DISPOSAL NN
VIACOM NNP
TIE VB NN
INADEQUACY NN
KLUX NNP
SPIEGEL NNP
TIM NNP
TIN NN
EQUALS VBZ
SANJIV NNP
TIP NN NNP VB
ARTFUL JJ
BRUNDTLAND NNP
CAR-PARKING JJ
SUBVERSION NN
ARIAS NNP
INDULGENCES NNS
DESTRUCTIVE JJ
CORRECT JJ VB VBP
EWARD NNP
PROVOCATION NN
BEKAA NNP
BREAK-UP NN
NEGOTIATING VBG NN
LACKLUSTER JJ NN RB
VERGED VBD
RECONFIRMATION NN
SCHOOLTEACHER NN
DESIGNERS NNS
REMARKETERS NNS
11,116 CD
HELPING VBG
SUMMONED VBN VBD
PERSECUTING VBG
STARTING VBG NN JJ
SINGLE-A-1 JJ
SINGLE-A-2 JJ NN
SINGLE-A-3 JJ NN
KUIPER NNP
MERCHANT NN JJ
CONVINCE VB VBP
DORADO NNP
OFFSHOOTS NNS
YOSHIO NNP
LITMUS NN
FRUITBOWL NN
VEHICLE NN NNP
NEGOTIATION NN
TRANSPLANTATION NN NNP
DUMEZ NNP
55,000 CD
DOUBTED VBD
EXTRICATE VB
CLOAK VBP NN
FANNED VBD
CASH-SQUEEZE NN
THREE-DAY-OLD JJ
MINIMALISM NN
PERSECUTION NN
SUPERSEDED VBD VBN
KOCHAN NNP
DOUBTER NN
NON-VIRAL JJ
CONSTITUTIONALITY NN
MINIMALIST JJ NN
PENALIZE VB
KIDDING VBG
SAVAGELY RB
LIGHTHOUSE NNP
JORDAN NNP
POST-SPLIT JJ
INSURABILITY NN
ANCIENT JJ NNP
MASS. NNP
NECKTIE NN
NONTRADITIONAL JJ
MD-80 NNP NN
REASSURINGLY RB
MISADVENTURES NNS
PORCELAINS NNS
MINUTE NN JJ
UNDERSTATEMENT NN
HEARTLAND NN
FEMININE-CARE JJ
EMPHATICIZE VB
CROSS-BAY JJ
STRATEGY NN NNP
LEGISLATOR NN
WILLING JJ VBG
WAVED VBD
MASSE FW NN
THUNDER NN
COMPATIBILITY NN
BEDROCK NN
TRADEMARK NN
SEMESTERS NNS
DISPOSED VBN VBD JJ
STRIVE VBP
MANKIND NN
RADIANT JJ
WELLINGTON NNP
HORNETS NNPS
RUMOR-HAPPY JJ
767-300 NNP
DRESDEN NNP NN
WAVES NNS
TEEN-AGE JJ
10.125 CD
JANEIRO NNP
46.1 CD
DISPOSES VBZ
46.2 CD
CLASSICISM NN
46.3 CD
RESTATEMENT NN
NEOPHYTE JJ
CLOCK NN
BILLED VBN VBD
MAINLINE JJ NN
ARIEL NNP
46.5 CD
MID-SEPTEMBER NN NNP
46.6 CD
46.7 CD
HALLOWED JJ
46.8 CD
46.9 CD
DIFFERENTIATING VBG
CAMOUFLAGE NN
ALLIED-SIGNAL NNP
100-POINT-PLUS JJ
HEXCEL NNP
HOELZER NNP
BILLET NN
DIONNE NNP
THRICE RB
MASCULINE JJ
LAYOFF NN
DEXTERITY NN
MOONIE NN
IRWIN NNP
PEELED VBN
TNN NNP
UPRISING NN
CLUSTERS NNS
TNT NNP
ODD-LOOKING JJ
WHITMAN NNP
HICKEY NNP
ATTENDING VBG
LONGTIME JJ NN
URANIUM NN NNP
INFLOWS NNS
ELSWEHERE NN
OUTFIELDERS NNS
90-YEAR JJ
TOE NN NNP
MASUR NNP
DWELLINGS NNS
RESTAURANT NN NNP
PATIENCE NN
FROGMEN NNS
U.K NNP
TOM NNP
TON NN
AIR-PASSENGER NN
FANNIE NNP
TOO RB NNP
WIELDING VBG
NIGHTCLUBS NNS
TOP JJ NN VB VBP NNP
U.S NNP
TOT NN
ERSATZ JJ
TOW RB NN
TOY NN JJ NNP
CONVOY NN
RIGHT-WING JJ NN
RUSTLERS NNS
RESOLVED VBN VBD
TPA NNP
GRIFFIN NNP
STRAIGHT JJ RB
COUNTERCLAIM NN
LIBEL NN
HIGHWAY-CONSTRUCTION JJ
STAGING NN VBG
INSTITUTED VBN VBD
BALCONIES NNS
MOTHBALLING NN
NAKHAMKIN NNP
10.06.89 CD
SHOCKING JJ
ABATING VBG
GEOFFREY NNP
HORWITZ NNP
INVESTOR-RELATIONS JJ NNS
KINDLED VBN
HIGHER-PRICED JJ
852,000 CD
INSTITUTES NNPS NNP NN
UNENCUMBERED JJ
PREDICT\/ADVOCATE VBP
HUMBLED VBN
BUY-STOP JJ
INNOVATE VB
EQUATE VB
ASTRONOMER NN
GLIMMER NN
HEIMERS NNP
RESTRICTING VBG
THRIFT NN NNP
BILLIE NNP
BEGINNING VBG NN
ENROLLED VBD VBN
47-YEAR-OLD JJ
DRINKING NN VBG
MCBRIDE NNP
PINKERTON NNP
FALTER VBP
KAFAROFF NNP
GITANO NNP
BRUNELLO NNP
MENOMONEE NNP
TOILETRIES NNS
TRC NNP
WOODROW NNP
EFFICIENTLY RB
ROARING NN NNP VBG
CORRELL NNP
UNDERFUNDED VBN
REFOCUSING NN VBG
TRO NN
8.0087 CD
RESTRICTION NN
DELPHI NNP
ARCHITECT NN
TRT NNP
ELRICK NNP
TRW NNP
TRY VB VBP NN
BIAS NN NNP
DEBUSSY NNP
HYPERCARD NNP
JITTERS NNS
OPPORTUNITIES NNS NNPS
45TH JJ
SCROUNGE VBP
MEMENTOS NNS
WILMINGTON NNP
JITTERY JJ
DUMMY NN JJ
FESTIVITIES NNS
MYSELF PRP
SATISFACTORILY RB
STRESS-RELATED JJ
INHERITOR NN
CASUALTY-LOSS JJ
FORECAST NN VBN VBD VBP VB
RECONFIGURE NN
1\/10TH NN
CREAMS NNS
VIROLOGY NNP
SHUTTLE-BUSING NN
REALIGNING VBG
QUADRANT NNP
CREAMY JJ
KOCHIS NNP
AUTOMOBILES NNS
GEOFFRIE NNP
PRONUNCIATION NN
FORBIDS VBZ
BLUEBLOODS NNS
62,800 CD
YEAR-LONG JJ
OAKS NNP NNS NNPS
NORDINE NNP
INCONCLUSIVE JJ
FELDMAN NNP
DECLARATIONS NNS
BICK NNP
NON-FAMILY JJ
TWENTIETH NNP
THIEME NNP
POTALA NNP
STOREFRONTS NNS
GARRICK-AUG NNP
TUG NN
BOURBON NN
BREEDING VBG NN
BIDS NNS VBZ
REPOSITORIES NNS
DUMPS VBZ NNS
BULKED-UP JJ
SENTIMENTS NNS
DEARIE NNP
PROSPER VB
TVA NNP
BASHAM NNP
GASTON NNP
192.12 CD
PARACCHINI NNP
IBM\/PC NNP
NONCOMPETITIVELY RB
DISAPPEAR VB VBP
NANCY NNP
FREQUENCIES NNS
702.4 CD
TVS NNP NNS
GLIDING VBG
BIEN NNP
TVX NNP
INNOVATED VBD
ORGANS NNS
ATHLETIC-SHOE NN
QUESTIONABLE JJ
TWA NNP
THRILL NN VB
BENTLEY NNP
INSUBORDINATION NN
TWO CD
CRAMER NNP
BLUES NNS NNPS NNP
9,232 CD
CONVICTION NN
WIDOWS NNS
REMINDING VBG
BAND-WAGON JJ
PRINCETON\/NEWPORT-LIKE JJ
SCULLEY NNP
WERTHEIM NNP
HOLDING VBG NN NNP
EQUATED VBN
FLYING VBG NNP
CONTRACEPTIVES NNS
KIHEI NNP
WAVING VBG
MAILERS NNS
TIGERS NNS NNP
YETNIKOFF NNP
BLUFF NNP
MURALS NNS
EQUATES VBZ
BIGG NNP
TXO NNP
CENTEL NNP
RUNNING VBG NN JJ RB
CENTER NN NNP JJ VBP RB
BACKPACKS NNS
MAGGART NNP
WIDESPREAD JJ
BEDROOM NN
AEROBICS NN NNS
TAINTED JJ VBN
DISGRACEFUL JJ
REVERBERATIONS NNS
ALL-TOO-SINCERE JJ
YUTAKA NNP
REALISTICALLY RB
PURLOINED NNP
UNCONVENTIONAL JJ
RESTRICTIVE JJ
A.C. NNP
INADEQUATE JJ
DEARLY RB
52-STORE JJ
PISSOCRA NNP
CONCERNING VBG
MOVEMENT NN NNP
SECOND-BIGGEST JJ
HORMONE-TREATED JJ
SHAEVITZ NNP
BLOODBATH NN
CREATE VB VBP
UNREALISTICALLY RB
BEANSTALK NN
VOLUNTEERS NNS
SEXUALLY RB
BEINGS NNS
354,000 CD
LIBOR NNP
SELF-CRITICISM NN
MOP-UP NN
JOURNALISTS NNS NNPS
A.D. NNP
POLTERGEISTS NNS
SUBTRACTING VBG
SOMATOSTATIN NN
SYMPATHIES NNS
SEIZURE NN
AUTHORSHIP NN
BUYER NN NNP
OPEN-YEAR JJ
37,820 CD
ARISE VB VBP
SELF-SERVING JJ
62,872 CD
LENDS VBZ
400-MEMBER JJ
THRIPS NN
PUBLIC-INTEREST NN JJ
PROMPTING VBG NN
ESTIMATED VBN VBD JJ
JACUZZI NN
A.E. NNP
80-PLAYER JJ
PELVIC JJ
DRUG-SEEKING JJ
LEONARD NNP NN
OPULENT JJ
CHARMING JJ
UNDERSTANDS VBZ
PRINCETON\/NEWPORT NNP
ISAO NNP
ANTIFREEZE NN
SUBTRACTION NN
FLAGRANT JJ
POTASH NNP
DISPOSTI NNP
ESTIMATES NNS VBZ
DISPOSING VBG
LIVE-HAULERS NNS
RECLUSIVE JJ
22,985,000 CD
28.625 CD
SIXFOLD JJ RB
10-WEEK JJ
TAILBACK NN
CULMINATING VBG
BIKE NN NNP
462.2 CD
SEMICONDUCTOR-MANUFACTURING NN
462.8 CD
A.F. NNP
462.9 CD
NOTWITHSTANDING IN RB
FRIENDLINESS NN
THIEBAUD NNP
TWIN-DEFICIT NN
HYSTERIA NN
CAMPED VBD
GREANEY NNP
OATH NN
STAFF-REDUCTION NN
TANAKA NNP
INTEGRATED-STEEL NN
TRIFARI NNP
PATHETIC JJ
TRELLEBORG NNP
CALAVERAS NNS
TREATISES NNS
PAY-AND-BENEFIT JJ
CLOSE VB NN JJ RB VBP NNP
POTATO NN
EX-PLAYER NN
OATS NNS NN NNP
61.875 CD
LAYOUT NN
CULMINATION NN
BILL NN NNP VBP VB
OBSCURITY NN
A.G. NNP
COLOMBIA NNP
FLASHY JJ
HUNGERFORDS NNP
INDETERMINATE JJ
OREGON NNP NN
MATCH VB NN VBP NNP
GENTLELADIES NNS
DURABLES NNS NNPS
RIVKIN NNP
184.74 CD
PUR-POISES NNS
ANNOUNCE VB VBP
FINGERLINGS NNS
ICE-BAGGERS NNS
CLOTH NN
VIDUNAS NNP
STIPULATE VB
382.2 CD
DISTINCT JJ
MCDUFFIE NNP
PRAISE NN VB VBP
HOME-BUILDING JJ NN
382.9 CD
A.H. NNP
SCURRYING VBG
UNAWARENESS NN
WYMAN NNP
FILCHED VBN
TWEETY-BIRD JJ
FOSTERING VBG
MONTH-OLD JJ
21.03 CD
37,860 CD
JINDO NNP
CLOUD NN VBP VB
RETAILER NN
DETROIT NNP
SKYROCKETING VBG
BIND NN
RENOUNCE VB
BING NNP
EMPIRE NN NNP
RUBICAM NNP
8.292 CD
BARGELIKE JJ
CLOUT NN
A310-300S NNP
8,839 CD
MURATA NNP
INGALLS NNP
MATED VBN
INFILTRATING VBG
BINS NNS
EMPTYING VBG
AT-LARGE JJ
SISTER-IN-LAW NN
COMMITMENTS NNS
EVANGELIST NN
BINY NNP
168.50 CD
967,809 CD
54-YEAR-OLD JJ
3-4-5 CD
LENIN NNP
MATEO NNP
CAPITAL-DRAINING VBG
MATER NN
MATES NNS
21.18 CD
EARLHAM NNP
19-MONTH JJ
INSTITUTUE NNP
528.3 CD
TAIWANESE JJ NNP NNPS
61.5-POINT JJ
528.4 CD
COSMOLOGIES NNS
CEZANNE NNP
BLUNT NNP VB JJ
GUARDS NNS VBZ NNPS
STIFLE VB
PATIENTS NNS NNPS
BUOYED VBN VBD
ELDER JJR
35-MEMBER JJ
HIGH-SULFUR JJ
MATHEMATICS NN NNS
FINESSED VBN
THRIVE VBP VB
13.02 CD
21.23 CD
13.05 CD
DEARTH NN
21.25 CD
13.07 CD
INTEREST-FREE JJ
INTERNAL JJ NNP
MILBANK NNP
INNOVATOR NN
OIL-CONSUMING JJ
ARIZ. NNP
YEAREND NN
VRIES NNP
PEMBERTON NNP
DANGEROUSLY RB
WISTFUL JJ
WHIMPERS NNS
FAMOUSLY RB
LOWER-INCOME JJ
DETACHED VBN
SECURITIESS NN
ERBURU NNP
21.33 CD
13.15 CD
13.18 CD
ENCHANTING JJ
ONE-YEAR JJ
STERBA NNP
COMPATRIOT NN
UAL NNP
IMITATING VBG
CRAMPS NNS
UAP NNP
A.L. NNP
UAW NNP
MEHTA NNP
CONWAY NNP
HERZFELD NNP
BUCKERIDGE NNP
CIVILIZATION NN
21.42 CD
13.25 CD
21.44 CD
13.26 CD
SMELLING VBG
13.27 CD
BIRD NN
AMAZEMENT NN
THRIFT-OVERHAUL NN
VIOLATIONS NNS
BIRK NNP
LUSTGARTEN NNP
A.M. NN RB
UBS NNP
FOUR-INCH JJ
IMITATION NN
TARNOPOL NNP
CASH-AND-STOCK JJ
OZZIE NNP
LIBYA NNP
REINSTATED VBD VBN
ROUKEMA NNP
FRANCISO NNP
21.50 CD
13.32 CD
SNAGGED VBN
13.34 CD
13.35 CD
GOLOVEN NNP
SINGLING VBG
821-201 CD
GHASTLY JJ
13.39 CD
MEDNIS NNP
368.3 CD
368.4 CD
BEGINNINGS NNS
THRIFTS NNS
8,880 CD
368.5 CD
PLACE NN VB VBP NNP
DISCOS NNS
NARCOTICS NNS NNP
IMPROVISATORY JJ
DEVOTION NN
BLURT VBP
SQUATTED VBN
ONE-PAGE JJ
MOTORBIKE NN
PENNZOIL NNP
ROADBLOCK NN
VA.-BASED JJ
114.2 CD
114.3 CD
FORBIDDING-LOOKING JJ
114.4 CD
114.5 CD
RUTHLESS JJ
114.6 CD
13.44 CD
114.7 CD
DEBUTED VBD
SAATCHI NNP NNS
BLUSH NN
CENTRE NNP
PARTISAN JJ
BITE VB NN
REWARD NN VB
LENNY NNP
INVESTIGATIVE-REPORTING NN
MODIFICATIONS NNS
7.875 CD
INTERNET NNP NN
RAYTHEON NNP
LAWRENCE NNP
STEREO NN JJ
BITS NNS
CENTRALIZED JJ VBN
REINHOLD NNP
POST-WATERGATE JJ
13.50 CD
21.71 CD
21.72 CD
FILLMORE NNP
BUYOUTS NNS
13.57 CD
JINKS NNS
SCARBOROUGH NNP
ZELLERS NNP
ANXIETY NN
EGG-BREAKING NN
BOVINE JJ
BRAWER NNP
BULLYING VBG
FREEPORT NNP
MAGNETIZED VBN
288.9 CD
UEP NNP
EDUCATORS NNS NNP
A.P. NNP
ISLE NNP
UNERRINGLY RB
WINSTON-SALEM NNP
HEALTHCARE NNP NN
PRIMORDIAL JJ
NON-OBJECTIVE JJ
ASHAMED JJ
STRENGTHENS VBZ
MACHINERY-TRADING JJ
13.63 CD
DALAI NNP
13.64 CD
13.65 CD
13.67 CD
PALPABLE JJ
21.88 CD
NATURALIZED JJ
DINOSAUR NN
BUDGET-CUTTING NN
YETERDAY NN
KYUSHU NNP
ALLEGE VBP VB
UFO NNP
POLITICAL-ACTION JJ
EARTHBOUND JJ
EURODYNAMICS NNPS
FRAZIER NNP
MEDICALLY RB
BALKANIZED JJ
ADOLPH NNP
13.71 CD
13.73 CD
DISSOLUTION NN
13.75 CD
TALLIED VBD
VIZEVERSA NNP
WORKBOOKS NNS
FREE-ON-BOARD JJ
13.78 CD
FLORIDA NNP
13.79 CD
21.98 CD
SPOTTED VBD VBN JJ
UGI NNP
ROUTINE JJ NN
INDEX-RELATED JJ
DISCOURAGE VB VBP
ZHONG NNP
ANTI-CHRIST NNP
ALPHARETTA NNP
ROUTING VBG NN
61.4 CD
REMARKETINGS NNS
61.7 CD
NON-PROFESSIONAL JJ
TALLIES NNS
WAGE-EARNING JJ
OMITTED VBN VBD
FIBER-RELATED JJ
BINGES NNS
RISKINESS NN
13.81 CD
PACED VBN
MARKET-OPENING JJ
ANTI-MORNING-SICKNESS JJ
OVERBOUGHT VBN
ENROLLEES NNS
FIRST-CLASS JJ
ROLFES NNP
PEGGED VBN VBD
CHAR-BROILED JJ
MOSCOM NNP
UHR NNP
A.S. NNP
VANESSA NNP
PSEUDOSOCIALISM NN
STOPPAGES NNS
747-400S NNS CD
MOSCOW NNP
13.90 CD
13.94 CD
ENABLING VBG
UIC NNP
DICKENS NNP
SCHERINGPLOUGH NN
13.97 CD
PLAID NN JJ
BULLOCK NNP NN
DUNDE NNP
APPARATUS NN
CROSS-MARGINING NN
PLAIN JJ NN RB
NUCOR-LIKE JJ
GROUSED VBD
SUBSISTENCIAS NNP
NECCI NNP
POSTMARKS NNS
3416.81 CD
MAINSTAY NN JJ
CRISTIANI NNP
GROUSES VBZ
GITANES NNP
MAURER NNP
MINI-COMPONENT JJ
SINGLE-B-1 JJ NN
DALEY NNP
SINGLE-B-2 JJ NN
PASSIONS NNS
SINGLE-B-3 NN JJ
SELF-RIGHTEOUS JJ
TRESPASSING NN
RE-ENACTMENTS NNS
LOOTING NN VBG
IMAGINED VBD VBN
DUNES NNS NNPS
MARKET-MAKER NN
THOMPSON-CSF NNP
BEBEAR NNP
255,923 CD
SECTIONS NNS
DISTINCTION NN
HIGH-BETA JJ
SAYING VBG NN
IMAGINES VBZ
QUICK-FIX JJ
AS-YET RB
MATRA NNP
PALESTINIAN JJ NNP NN
CRIME\/COMEDY NN
ACCUMULATING VBG
BELCH NN
DISCRETIONARY JJ
ALPHABET NN
BILLING NN VBG
COUNTERREVOLUTIONARY JJ NN
1482.62 CD
CAMPUS NN
ELEMENT NN
ULI NNP
1466.29 CD
TREASURE NNP NN
BRAWLS NNS
TOMATOES NNS
REIMBURSE VB VBP
DEPEND VB VBP
REFRIGERATION NN
EMBROIDERY NN
POWWOW NN
KHOMEINI NNP
SUB-SAHARAN JJ
INSULINS NNS
MOST-FAVORED JJS
INCIDENTAL JJ
TREASURY NNP NN
DISTILLERS NNS NNP NNPS
APPLIANCES NNS
SPECIALTY-CHEMICALS NNS
DISTILLERY NN
ACCUMULATION NN NNP
RESTRAINING NN JJ VBG
ACORNS NNS
SCHIFFS NNPS
UPDATED VBN
REKINDLING VBG
RAVENSWOOD NNP
BILLION CD
47.1 CD
ARCHAIC JJ
47.2 CD
47.3 CD
47.4 CD
UNSECURED JJ
99,000 CD
47.5 CD
47.6 CD
REINKER NNP
47.7 CD
61-YEAR-OLD JJ
47.9 CD
ELKHORN NNP
SURVIVE VB VBP
800,000 CD
UPDATES NNS
CARICATURES NNS
RELIGIOUSLY RB
V-6 NNP NN
UMW NNP
COLORLINER NNP
LATITUDE NN
CITICORP NNP VB
CRESSON NNP
REFUGE NN NNP
.9.82 CD
RENOIRS NNPS
TRUCE NN
UNA NNP
UNC NNP
HENDERSON NNP
WELL-RECEIVED JJ
TRUCK NN NNP VBP
MELBOURNE NNP
THINNED VBN
TEEN-AGERS NNS
CARAT NNP NN
SHIOYA NNP
DALIS NNPS
SYMPATHIZE VBP
OBEY VBP NNP
PLANE NN NNP
PACKS VBZ NNS
UNO NNP
BRAWNY JJ
UNR NNP
OVERSEEING VBG
THINNER JJR
SUBSCRIBING VBG
LONG-TROUBLED JJ
PLANS NNS VBZ NNP VBP NNPS
PLANT NN NNP VB
TAXABLE JJ
OUTLANDERS NNS
ADMITTING VBG
AGONIZING JJ
NEW-MODEL NN JJ
158,666 CD
VIEWS NNS VBZ
PERSONAL-PROPERTY NN
PINOCCHIO NNP
CURRIER NNP
WBBM-TV NNP
SAFFORD NNP
DARRELL NNP
POLYPS NNS
LIMITED JJ VBN NNP VBD
STUCK VBN VBD JJ
LIABILITIES NNS
HINTING VBG
DESOLATE JJ
WAERTSILAE NNP
FALTERS VBZ NNP
FARMWIVES NNS
AIR-CARGO NN
EXCHANGEABLE JJ
UPS NNS NNP
ZAPPING VBG
BARBADOS NNP
PUBLISHED VBN VBD JJ
MANUFACTURERS NNS NNPS NNP
RARING JJ
VAUXHALL NNP
UNCOMPLICATED JJ
PHYSICIAN NN
DIALECTS NNS
CADBURY-SCHWEPPES NNP
KAWASAKI NNP
SKIDDING VBG
CARDS NNS NNP
CONTRIVED JJ
PUBLISHER NN NNP
PUBLISHES VBZ
BOSTIAN NNP
PLOTTING VBG
SNIFFING VBG
FISH-PROCESSING JJ
STUDY NN VB NNP VBP
JENNIE NNP
LOWEST-RATED JJ
ASSESSED VBN VBD
SINO-BRITISH JJ
CARED VBD VBN
BELIE VBP VB
DISTINCTIVE JJ
SIMULATED JJ
PURSUERS NNS
COCKTAIL NN
BELIN NNP
US$ $
TOTALED VBD VBN
CHILVER NNP
CARES VBZ
LEAFLETS NNS
26-YEAR-OLD JJ
CAREW NNP
NECKS NNS
CAREY NNP
SHANNON NNP
SIMULATES VBZ
URS NNP
FOUNDING NN VBG JJ
JOGGER NN
HEFFNER NNP
POISONED VBN
JUST-PICKED JJ
STUFF NN VBP
WHITNEY NNP
USA NNP
PERUVIAN JJ NNP
CELEBRITIES NNS
USE NN VB VBP NNP
USG NNP
DISPENSATION NN
USI NNP
APPEL NNP
ROSTENKOWSKI NNP
INTERVENED VBD VBN
PHILANTHROPIC NNP
USO NNP
MODELED VBD VBN
RIDDER NNP
USS NNP
NATIONALE NNP
PRECIOUS-METALS NNS JJ
SIX-HOUR JJ
USX NNP
INTRAOCULAR JJ
RESOLUTIONS NNS
NATIONALS NNS
89108 CD
CARGO NN
STERTZ NNP
OWENS NNP
EDUCATIONS NNS
HANDLED VBN VBD
CATHODE-RAY NN
ROHRER NNP
PLATE NN
ACCOMPLISHMENT NN
27\/32 CD
SIBLINGS NNS
CLAIRTON NNP
HANDLES VBZ
IDEAL NNP JJ NN
BELLA NNP
THERAN NNP
2681.22 CD
REFUND NN VB
BELLE FW
PLATT NNP
IDEAS NNS
YAMAMOTO NNP
BELLI NNP
BASINGER NNP
BELLO NNP
INFECTIONS NNS
BELLS NNS NNP NNPS
BELLY NN
MONTAGU NNP
HAWORTH NNP
MULTIPLYING VBG
CONSULTING-FIRM NN
COMMISSION NNP NN FW
STOCK-REPURCHASE JJ
VENTED VBD
DON'T-CON-ME JJ
PAPERBACK NN
OUTBIDDING VBG
GEFFEN NNP
CITIZEN-SPARKED JJ
UVB NN
BUILDING NN VBG NNP
DUBNOW NNP
BOWLING NN VBG NNP
MOTORISTS NNS
VENTES NNP
YANKEES-METS JJ
REDEVELOPMENT NNP NN
EMPLOYED VBN
ADVERTISING NN NNP VBG VBG|NN
EMPLOYEE NN NNP
CAESARS NNP
UNHAPPY JJ
BEAN-COUNTING NN
PATIENT-ADVOCACY NN
EMPLOYER NN
TAXFREE JJ
UPTICK NN VB
302,000 CD
TRACTORS NNS
OPINING VBG
MELAMED NNP
DONNED VBD
RESIDUAL JJ
PACTS NNS
CRANES NNS
HARANGUES NNS VBZ
64-35 CD
TRULY RB
BOWLING-RELATED JJ
ANTI-TOXIC JJ
SEAT-BELT NN
RESCINDING VBG
FOLLOWS VBZ
TIPPLING JJ
BILLOWING VBG
KLATMAN NNP
REITERATED VBD
LOCALITIES NNS
877.6 CD
SCHERER NNP
29,700 CD
10,873 CD
CONFRONTATIONAL JJ
PROWESS NN
BASICS NNS
ENHANCED VBN JJ VBD
REITERATES VBZ
TRUMP NNP
BELOW IN RB
CAPITAL-FORMATION NN
WARBURG NNP
OPINION NN NNP
USUSAL JJ
DESTROYS VBZ
BYNOE NNP
SPENDTHRIFTS NNS
SHROUDED VBD
623.5 CD
PERMANENT-INSURANCE JJ
8.325 CD
POLYMERASE NN
NOW-SHAKY JJ
ALCOHOL NN NNP
CRUNCHIER JJR
8.328 CD
CARLA NNP
ENHANCES VBZ
ALLEYS NNS
MASS.-BASED JJ
338-44 RB
TRUNK NN
QUARTERBACK NN
MONTICELLO NNP
TRAP NN
UYL NNP
NICOLE NNP
CREMATORIUMS NNS
FIVE-BY-EIGHT-INCH JJ
TRAY NNP
OPENINGS NNS
8.337 CD
KNEE NN
TOTALLY RB
PLAYS VBZ NNS NNP
REFUSE VB VBP NN
COGENERATION-PLANT NN
SCHWARZENBERGER NNP
2681.76 CD
DUCKLING NN
APPLE NNP NN
132,000 CD
RIDDLE NN
KNEW VBD
37.375 CD
UZI NNP
PLAZA NNP NN
STUMP NN
SELF-ESTEEM NN
FABRICS NNS NNP
OCCUR VB VBP
9,360 CD
543.5 CD
GINTEL NNP
8.347 CD
UNFAIR JJ
APPLY VB VBP
STANTON NNP
REFUTE VB
PARTIAL JJ
POWER NN NNP VB
SHORT-WAVE JJ
STUNG VBN
PINPOINT VB NNP
BRYNER NNP
HOT-AIR JJ
AMOUNT NN VB VBP
MINWAX NNP
URGENT JJ
SWEARS VBZ
SALTWATER NN
UPROAR NN
FINLAND NNP NN
STUNT NN
BEANTOWN NNP
ANDREAS NNP
89,500-A-YEAR JJ
ACQUAINTED VBN
ZIMBABWEAN JJ NNP
PASSAIC-CLIFTON NNP
GNU-EMACS NNP
EQUAL-OPPORTUNITY NN
SNAKE-OIL JJ
RESIDUES NNS
SHIVERS NNS NNP
COURTAULDS NNP
PAN-EUROPEAN JJ
2657.38 CD
MONTANA NNP
EXCEPTION NN
GIVEAWAYS NNS
CAROL NNP
SKR20 NNS
TWO-WAY NNP
INFECTIOUS JJ
SKR29 NNS
14-POINT JJ
SIMULATOR NN NNP
398,000 CD
CURRENT-COUPON JJ
BEHIND-SCHEDULE JJ
VIATECH NNP
SURELY RB
MAGNETIC JJ
HEROINE NN
8940061 CD
2665.66 CD
BELTH NNP
STILL-UNDEVELOPED JJ
TREE NN
BRISKER JJR
DECRYING VBG
TREK NNP
GENERAL-PURPOSE JJ
DELINQUENT JJ
BELTS NNS
MICROLOG NNP
SWEATY JJ
EIGHTY-FIVE CD
CRANKS NNS
SONY-COLUMBIA NNP
8.375 CD
PROPORTIONAL JJ
MANIAC NN
PLEADED VBD VBN
DEVELOP VB VBP
UNIROYAL NNP
KNIT VBN
BAD-LAW NN
TRUSK NNP
TRANSAMERICA NNP
TRUST NNP NN VB VBP
7.904 CD
383.8 CD
SUCCEEDED VBN VBD
383.9 CD
FRIEDMAN NNP
8.387 CD
RBSPR NNP
LIVING VBG NN JJ
RANIERI NNP
COMPUTER-GENERATED JJ
ELECT VB VBP
CARRE NNP
ENCOMPASSED VBD
FOREIGNERS NNS
LEHMAN NNP
TRUTH NN
AMOURS FW
PARTIES NNS VBZ
EARTH-QUAKE NN
VERFAHRENSTECHNIK NNP
PICTURESQUELY RB
DESIRED VBN VBD
ENCOMPASSES VBZ
CARRY VB VBP NNP NN
DEPREDATIONS NNS
VOTERS NNS NNP NNPS
EDOUARD NNP
DEVILLARS NNP
GRUESOME JJ
8.395 CD
RENAISSANCE-STYLE JJ
FIREPLACE NN
SUOMINEN NNP
ITEL NNP
RELATIVES NNS
ITEM NN
INCOHERENT JJ
DESIRES NNS
SLAUGHTER NN NNP
CENTIMETER NN
L'INCORONAZIONE FW
TRIGGERING VBG
WELCH NNP
NILSON NNP
NAOMI NNP
ENRAGED JJ VBD
DATA-SERVICE JJ
SCREAMING VBG
GLITTERATI NNS
ARGENTINA NNP NN
EXTRACT VB NN
SOFAS NNS
UNDISCLOSED JJ
NO-LOADS NNS
ARGENTINE JJ
SUFFERS VBZ
MCNEILL NNP
ROUSSEL-UCLAF NNP
BALLADUR NNP
ARASKOG NNP
TIGREAN JJ
COUNTERPOINT NN
HARASSED VBD
THERMO NNP
RADICAL JJ NNP
33-YEAR-OLD JJ
SELF-CONFESSED JJ
MCCORMICK NNP
HIGH-TAX JJ
PERSHARE JJ
TRIM VB JJ VBP NNP
CARTS NNS
CLARKSON NNP
TRIO NN
TRIP NN
ANYTHING NN NNP
TOP-DRAWER NN
STIGMA NN
VA. NNP
DARWIN NNP
MALICIOUS JJ
COMPUTER-SERVICING NN JJ
UNDERSERVED NNP
GRIMES NNP
7.937 CD
FLATLY RB
CHAVANNE-KETIN NNP
GUJARAT NN NNP
MISREPRESENTATIONS NNS
ERASER-FITTED JJ
FRUITION NN
DODDERING JJ
SLURRY NN
POSTPONING VBG
RXDC NNP
EXPLORING VBG
CUTTY NNP
DEFENDANTS NNS
BREAD NN
WARN-YOUR-ENEMY JJ
PROSPERITY NN
FIREBALL NN
449.3 CD
PHONEBOOK NN
VAN NNP NN
RELATIONSHIPS NNS NNPS
BREAK VB NN VBP
BREAN NNP
STEWART NNP
PRECEDENTS NNS
VAX NNP
BILATERAL JJ
CONCLUDED VBD VBN
CARVE VB VBP
FURRIERS NNS
BASING VBG
NEW-PRODUCT NN
FIZZLED VBD VBN
THROUGHOUT IN
SOAPBOX NN
PHYSICIST NN
CONCLUDES VBZ
ABOVE-NORMAL JJ
EAGER JJ
SUREST JJS
7.955 CD
IMPEDIMENT NN
SOVIET-ISRAELI JJ
AMERICA NNP
ASSET-ALLOCATION JJ
GALLEN NNP
CARTRIDGE NN NNP
B-FLAT NN
GALLES NNP
KNOT NN
NECESSITIES NNS
KNOW VB VBP NNP
BRISKLY RB
MINELLA NNP
CHONG-SIK NNP
EARLIER RBR RB JJR JJ NN
7.962 CD
TEST-COACHING JJ
ACHING VBG
CRESTED NNP
VCR NNP
SURETY NNP
WELL-KNOWN JJ NN
BICKERING NN VBG
AIR-CONDITIONING NN JJ
GOODE NNP
LEONA NNP
WELL-SEASONED JJ
RETALIATING VBG
LEONG NNP
SUPER-ABSORBENT JJ
GOODS NNS NNP
LARGER JJR
VLSI NNP
CONCEPTS NNS
GOODY NNP
TWO-YEAR-OLD JJ
PRIMARY-ELECTION NN
BERSON NNP
HAPPINESS NN
ABORTION-RELATED JJ
MOCKINGLY RB
RETURNS NNS VBZ
HEIGHTENED VBN JJ VBD
DICTIONARY NNP
DISPROPORTIONATELY RB
CARYL NNP
RETALIATION NN
BREED NN VBP VB
INSUFFICIENT JJ
289.7 CD
DEALS NNS VBZ
DEALT VBN VBD
GLASNOST FW NN
7.986 CD
VET NN
COLLATERALIZED JJ VBN NNP
NONSTOP JJ NN
CAUTIONING VBG
BELMONT NNP
DISK-DRIVE NN
CONFLICT NN VBP
20-STOCK JJ
DETRACTORS NNS
AFTERWARD RB
MCORP NNP
NAJARIAN NNP
TROP FW
OVERLAPPING JJ VBG
MARRIAGE NN
TROS NNS
PANHANDLE NNP NN
ANNUALIZED VBN JJ
TOWNHOUSE NN
TROY NNP
SOFIA NNP
PARTING NN VBG
BEGGARS NNS
AFFORDED VBN
DEANE NNP
VGA NNP
HARRIED VBN
WALBRECHER NNP
WELKO NNP
RELINQUISH VB
ACCUMULATE VBP
HOISTING NN
62.1 CD
GOVERNANCE NN
62.2 CD
RESTRICTIONS NNS
PARALEGAL NN
62.3 CD
ENABLED VBD VBN
62.5 CD
62.6 CD
248,279 CD
KNUETTEL NNP
62.7 CD
62.8 CD
HARRIET NNP
477.00 CD
WILLKIE NNP
BALANCED-BUDGET JJ
MANILA NNP
GRIMLY RB
VERDE NNP
PHYSICIAN-REIMBURSEMENT JJ
RAISERS NNS
MIAMI-BASED JJ
ENABLES VBZ
VERDI NNP
MAKESHIFT JJ
TRADITIONALISTS NNS
ELENA NNP
MICROPROCESSOR-BASED JJ
DERMATOLOGICAL JJ
WELLS NNP NNS
ARCHITECTS NNS NNPS
SEISMIC JJ
150-POINT JJ
CYCLONE NNP
INVITE VB
ROYALTY NN
DRIBBLE NN
ITOH NNP
NEWSDAY NNP
CORAZON NNP
DYCOM NNP
EAGLE NNP
VIA IN NNP
RONALD NNP
RESEARCH-AND-PRODUCTION JJ
PHILOSOPHIC JJ
INTERNALLY RB
VIC NNP
GOVERNMENT-IMPOSED JJ
CAFETERIA NN
VIE NNP
PROPONENT NN
ZACH NNP
ENGAGE VB VBP
VII NNP
DENLEA NNP
CHILD-CARE JJ NN
QUEASILY RB
HAUSSMANN NNP
ANGUISH NN
STRUGGLED VBD VBN
BECKMAN NNP
VIS FW
ONE-TENTH NN JJ
MASTERMINDING NN
FRUSTRATIONS NNS
FORKLIFTS NNS
ARTHUR NNP
60-MONTH JJ
MANDATE NN VB
ERRATICALLY RB
AFFILIATING VBG
STRUGGLES VBZ NNS
SELF-EMPLOYMENT NN
O'BRIAN NNP
RESPONDED VBD VBN
HALLWAYS NNS
SCHOOLING NN
47,000 CD
HAULING VBG
MILGRIM NNP
HEAVY-CONSTRUCTION NN
RECYCLABLE JJ
BURGUNDIES NNPS
EQUAL JJ VB VBP NNP
VERGE NN
ALUN-JONES NNP
CONSUMER-TELEPHONE JJ
KIMBERLY NNP
SEARCH-AND-EXAMINATION JJ
MANION NNP
MULTILEVEL JJ
ROLES NNS
BALLOONING NN VBG
INHERITS VBZ
AFFILIATION NN
PRODUCT-DESIGN JJ
KIRSCHBAUM NNP
SHAPING VBG
CRIMINOLOGY NN
LINKING VBG
VERIFY VB
ROLFE NNP
HMONG NNPS
TRUD NNP
TRUE JJ NNP UH
SHRIVER NNP
DISSONANCE NN
ANDREA NNP
DEAD JJ RB NN NNP VBN
MAURY NNP
GALLONS NNS
DEAF JJ
APARENTLY RB
FRICTIONS NNS
REGIONAL JJ NNP
RAVITCH NNP
RELATIONSHIP NN
ASSUMED VBD VBN JJ
SMALL-EMPLOYER NN
ANDREI NNP
UPPER-INCOME NN JJ
STOCKTON NNP
DEAK NNP
DEAL NN VB VBP NNP
REEXAMINING VBG
TIRED JJ VBN
DEAN NNP NN
WAXED VBD VBN
PERCHLORATE NN
DEAR NNP RB
GALLON NN
ASSUMES VBZ
ANDREW NNP
LEGISLATURE NN NNP
WOLLAEGER NNP
JUMPED VBD VBN
DEATH NN NNP
TIRES NNS VBZ
ABACUSES NNS
VERIT NNP
KONHEIM NNP
48.2 CD
88-YEAR JJ
48.5 CD
48.6 CD
48.7 CD
CAUTIOUSLY RB
48.9 CD
SUBSTITUTING VBG
1,400-MEMBER JJ
STARING VBG
DEC. NNP NN VB
MONOLITHS NNS
VANDALISM NN
DEBT NN NNP
DISILLUSIONMENT NN
ANTI-NUCLEAR JJ
HOMOGENOUS JJ
SUPPLIED VBN VBD
O'BRIEN NNP
FLICKERED VBD
FLOPPED VBD VBN
40-YEAR-OLD JJ
EARNED VBD VBN
TRANSPLANTED JJ VBN
AD-UNIT NN
SUPPLIER NN
SUPPLIES NNS VBZ
QUITTING VBG
STAND-ALONE JJ
BIRINYI NNP
DECK NN
BRENT NNP
SUBSTITUTION NN
ADJUDICATORS NNS
VENDORS NNS
EDITING NN
BUZZY NNP
REPRESENTATIONS NNS
VOA NNP
CONJUNCTION NN
370.20 CD
MASS-PRODUCING VBG
SCOTCHED VBD
PROFOUNDLY RB
VON NNP
CHANCES NNS
SHAPIRO NNP
BESIEGED VBN JJ
VOS NNP
VOW NN
UNGLAMOROUS JJ
SCOTCHES NNS
MALONE NNP
BANNING VBG NN
MUSHKAT NNP
EMBARRASSING JJ VBG
SOMEWHAT-AMBIGUOUS JJ
WEASEL NNP
SEABOARD NN NNP
WISH-LIST NN
UNPOPULAR JJ
DUBOIS NNP
NOUVELLE JJ
EDITION NN
CHUNKS NNS
TRS-80 NNP
TORNADOES NNS
RECONCILE VB
LEGISLATURES NNS
DUMMIES NNS
ANDREWS NNP
WELTY NNP
ITINERARY NN
INTERCEDED VBD
DEEM VBP
TWO-NOTE JJ
DEEP JJ RB NNP
DEER NNS
CO-CHAIRMAN NN
SELF-IMPOSED JJ
LUXEMBOURG NNP
DEVIANT JJ
OCHS NNP
COMPETITIVELY RB
COINCIDENCE NN
900-TELELAW NN
FANATIC JJ
MARLOWE NNP
SCHULMAN NNP
MICE NNS
TRANSVESTITES NNS
MEANING VBG NN
VERNE NNP
MICH NNP
FAJITAS NNS
SHIPPING VBG NN NNP
COLUCCI NNP
UNQUESTIONABLY RB
ANTI-AIRCRAFT JJ
DEFY VBP
ROLLS NNS VBZ NNP
10.375 CD
CASES NNS VBZ
USHERED VBD VBN
ILLITERACY NN
HERETOFORE RB
PRECLUDE VB
SOFTY NN
370.58 CD
CASEY NNP
VS. IN FW CC NN JJ
HUMANITIES NNS
GUMUCIO NNP
17TH-CENTURY JJ
HINKLE NNP
GOOSE NN
CAMBODIAN JJ
GRAND-PRIZE NN
EQUIP VB
GALLUP NNP NN
ASSAILED VBD VBN
NON-HISPANIC JJ
STAGEWHISPERS VBZ
ZAMA NNP
SLEEPS VBZ
PARROTT NNP
PAINTINGS NNS
1.2345 CD
370.60 CD
WIRETAPS NNS
BURGLARIES NNS
604.72 CD
SLEEPY JJ
SECURITIES-TURNOVER JJ
CZECHOSLOVAKIA NNP
VT. NNP
REPLICATE VB
145-150 CD
WORLD-WIDE JJ RB NNP
BREST NNP
IDIOCY NN
160-PAGE JJ
PURE-VOICED JJ
PLANTED VBN VBD
BALLPLAYER NN
PLAIN-VANILLA JJ
NOTIONS NNS
ARKLA NNP NN
ABSOLVE VBP
VTC NNP
BANKHAUS NNP
ZANE NNP
DAMON NNP
BUILT-FROM-KIT JJ
PLANTER NN NNP
WE'RE-ALL-IN-THIS-TOGETHER JJ
UNIDENTIFIED JJ
FICTIONAL JJ
DAIMLER-BENZ NNP
ACHIEVEMENTS NNS
PARTICIPANT NN
ZHIJIE NNP
SUBPOENAED VBN
CO-CHAIRMEN NNS
CASH-UP-FRONT NN
BRETZ NNP
L.A. NNP
PENTAGON-RELATED JJ
FUEL-STORAGE NN
SCURRIES NNS
20-STORY JJ
LATE-PAYMENT NN
COVER-UP NN NNP
CHATTING VBG
VACATIONING VBG
DEJA NN
370.85 CD
TELEMARKETERS NNS
SUMMERLAND NNP
MULTIPLIED VBN
DEATHS NNS NNP
WREAK VB
TRANSFORMING VBG
CATHOLICS NNPS
EMOTION NN
80.50 CD
FOUND VBD VBN
REFINED VBN JJ
STALLING VBG
80.53 CD
INSPIRED VBN VBD JJ
HIGHEST-QUALITY JJ NN JJS
IGNATIUS NNP
AMAZING JJ NNP
3717.46 CD
REFINER NN
DUNKIN' NNP
BACKBENCH JJ
ENTRY-PRICE JJ
HAWAII NNP NNPS NNS
PROGRESS NN VB NNP
VENUES NNS
SIMILIAR JJ
704.4 CD
ECHOING VBG
WORKMAN NN
CONGOLESE JJ
WHIPLASH NN
VERSA RB FW
KOBE NNP
LIPSTICK NN
DEL. NNP
VERSE NN
JUDICIAL JJ NNP
STALLION NN
SCROUNGED VBD
L.C. NNP
TORRENT NN
VERSO NN
SUPERIORITY NN
ZERO-INFLATION NN
PRAISEWORTHY JJ
THROWING VBG NN
RUBBED VBD
MODROW NNP
THEORETICALLY RB
MAINTAINED VBN VBD
WRECK NN VB
8,930,000 CD
56.13 CD
DELI NNS
DOCUMENT NN VB NNP
REPERTOIRE NN
DELL NNP
RUBBER NN NNP
TRUTHFULLY RB
DISAPPOINTED VBN JJ VBD
WESTMINSTER NNP
KOCH NNP
ELONGATE VB
BARGAINING NN VBG
213,000 CD
PRENATAL JJ
NEAR-MONOPOLIES NNS
ACCEDED VBD
PERFORMING VBG NN
TONED-DOWN JJ
INFRACTIONS NNS
56.25 CD
8.425 CD
GREENIAUS NNP
DEMO NN
FACETIOUSLY RB
PLEADINGLY RB
KRISPIES NNPS
INTER-AMERICAN JJ NNP
ATLANTIC NNP JJ
TRIMMED VBD VBN RBR
YEAREARLIER JJ
TSAO NNP
VERY-HIGHLY JJ
COPYRIGHT NN NNP JJ
DIPLOMAT NN
38,489 CD
ZOELLER NNP
DENG NNP
LEADED JJ
TRIMMER NNP JJR
ATLANTIS NNP NNS
TROUBLED JJ VBN VBD NNP
DUBOSE NNP
MIKE NNP
VERVE NN
THEOLOGY NN
FAR-AFIELD JJ
DENT NN
MCCLEMENTS NNP
LEADER NN NNP
REAGAN NNP JJ
L.F. NNP
COUPLETS NNS
DENY VB VBP
TROUBLES NNS VBZ
REASONED VBD VBN
PERSISTENT JJ
RESISTANCE NN NNP
PIOVRA FW
BAYER NNP
PARTICIPATE VB VBP
NOBUYUKI NNP
VIZCAYA NNP
BREMEN NNP
RECLAIMING VBG
INDUSTRIALIZATION NN
HIERARCHICAL JJ
REASONER NNP
CORVETTES NNS
FULFILLS VBZ
BEGGIATO NNP
WORKMEN NNS
BUREACRATIC JJ
MILD JJ
MONTVALE NNP
MILE NN NNP
OVERWRITTEN JJ
LAMOTHE NNP
NASA-AIR NNP
MILK NN VB
CHARMINGLY RB
GODOWN NNP
MILL NN NNP
FORMING VBG
RESEARCHED VBN
SHIMBUN NNP
MILT NNP
TOP-LEVEL JJ
KOFY NNP
MELANIE NNP
MIDDLE-MARKET JJ
1,351,662 CD
DEBAT NNP
FABER NNP
MAYHAP RB
STANFORD NNP
PHNOM NNP
MAINFRAMES NNS
KEEPING VBG NNP
RESEARCHER NN
MELANIN NN
RESEARCHES VBZ
8.457 CD
INVESTIGATED VBN VBD
CASTING VBG NN
STYLING NN VBG
OVERBUILDING NN
SOLID-WASTE NN
MIMI NNP
TIEMPO NNP
EMBOLDENED VBN
L.H. NNP
OCT. NNP NN
INVESTIGATES VBZ
SHRUBS NNS
SCOFFED VBD
53.875 CD
REASONABLE JJ
DEBT-SERVICE JJ
ADVERTORIAL JJ
BROKER-DEALER JJ NN|JJ NN
PIZZERIAS NNS
464.7 CD
BLURRING VBG
OPTION-RELATED JJ
8.467 CD
MIND NN VB
MINE NN JJ PRP VBP NNP
LITHOTRIPSY NN
DRI\/MCGRAW NNP
EPISCOPALIANS NNPS
MINH NNP
KOHL NNP
MINK NN
YEARGIN NNP
THESIS NN
REASONABLY RB
CASPI NNP
OPTIMISM NN
INFANT-MORTALITY NN
JULIANO NNP
MINN NNP
210.2 CD
210.3 CD
MCKINLEYVILLE NNP
MINT NN NNP
OPTIMIST NN
210.8 CD
YEARLING JJ
NETTED VBD VBN
8.475 CD
CASH-MANAGEMENT JJ
CARVING VBG
FUDGE VB VBP
REVIVALS NNS
DERR NNP
IMPLANTATION NN
DEBT-RATING JJ
CREAMED VBN
L.J. NNP
TIDBITS NNS
DISCONNECTED VBN JJ
BRUSSELS NNP NNS
BURDENS NNS VBZ
PROMOTIONS NNS
FIBERS NNS
RUBBLE NN
FLIPPANT JJ
CREAMER NN
DESC NNP
DESE NNP
EMINASE NNP
8.483 CD
DESK NN
ADAPTING NN VBG
STORYTELLER NN NNP
215.04 CD
SELF-DECLARED JJ
RETAINED VBD VBN JJ
SWEEZEY NNP
KOJI NNP
SYNTHETICS NNS
CASKETS NNS
BREATHLESSLY RB
RECALL VB NN VBP
130.1 CD
EQUUS NNP
TREND-SETTERS NNS
130.2 CD
HOSPITALIZATIONS NNS
107,100 CD
REPRINTS VBZ
METRICS NNS
130.6 CD
130.7 CD
MIPS NNP NNS
RETAINER NN
RYAN NNP
BERTIE NNP
BENCHMARKS NNS
416,290,000 CD
HEARING NN VBG
YEARN NN
YEARS NNS NNPS
BERTIN NNP
CO-FOUNDERS NNS
CONVENIENCE-STORE NN
MIGNON NN
18-MONTH-OLD JJ
GLEEFULLY RB
FREIGHT NN NNP VB
DYDEE NNP
CONFERS VBZ
OUTSTANDING JJ
USEFUL JJ
L.L. NNP
PATRONIZING JJ VBG
QUACK UH NN
NARROWING VBG NN
ENUNCIATION NN
FABRICATE VB
SECTORS NNS
LYRIC NN NNP
TRAILERS NNS
YEAST NN
MID-SIZED JJ
GRINDS VBZ
IMPETUS NN
SANCTIONED VBN
KOLB NNP
RIDERS NNS
SISTERS NNS
MIRE NN
200,000-SHARE JJ
LESLEY NNP
STYLISH JJ
RUDNICK NNP
SEXUAL JJ
L.M. NNP
DEUX FW
PROFESSIONALLY RB
STYLIST NN
SHRUGS VBZ NNS
CASTS VBZ
FHLBB NNP
RECOVERED VBD VBN
AH-64 NN NNP
REPETITION NN
RECOMMENDED VBD VBN JJ
MEGABILLION NN
CELEBRITY NN NNP
ANTI-CANCER JJ
MISA NNP
60-FOOT JJ
BLOOMINGDALE NNP
12-YEAR-OLD JJ
215.35 CD
DEBT-FREE JJ
TOWNSHIPS NNS
WISDOM NN
MONOLITHIC JJ
INDIRECTLY RB
FABLE NN
VIGIL NN
WAD NN VB
MISS NNP VB VBP
MIST NNP NN
WAG NN
RADAR-ELUDING VBG
WAH NNP
SCHMOOZING NN
CLASS-ACTION JJ NN
VOLUNTEERING NN
SCHOOLMATES NNS
STARTLED VBD
WAN NNP
WAR NN NNP VB
WAS VBD
VIEWINGS NNS
215.42 CD
TRAINING-WAGE JJ
SCHOLASTIC NNP
UNADITED JJ
CHASSIS NN NNS
HAJIME NNP
MITE NN
ILLITERATE JJ
KONG NNP
DERAIL VB
WAY NN NNP RB
215.48 CD
PROSECUTING VBG
AMITYVILLES NNPS
MITI NNP
TRANSACTIONS NNS
GENTILITY NN
20,000 CD
TAX-GIVE-AWAY JJ
GRINGO NNP
FLAUNT VB
STROKES NNS VBZ
OCCUPIED JJ VBN VBD
MICROBIOLOGY NNP
SIXTH JJ NNP RB
INSPECTORATE NNP
HURRICANE-HIT JJ
COMMON-SENSE NN JJ
WESTBORO NNP
INTEGRAL JJ
L.P. NNP NN
KOOP NNP
BURDETT NNP
CARTONS NNS
INDONESIA NNP
PROSECUTION NN
OCCUPIES VBZ
RESPITE NN
RATIFICATION NN
LESLIE NNP
ANTONINI NNP
SIXTY CD
SURFACE-TO-AIR JJ
DAMONNE NNP
NON-RECURRING JJ
DEBATED VBN
RELENT VBP
NOBODY NN
IDIOTS NNS
43-FOOT JJ
ZOOMED VBN VBD
215.67 CD
90-DAY JJ
DONORS NNS
CARTOON NN NNP
CHAIRMANSHIP NN
DEBATES NNS
116.3 CD
116.4 CD
ESKENAZI NNP
KOPP NNP
WDB NN NNP
116.7 CD
116.8 CD
116.9 CD
COMPANIES NNS NNPS NNP
MAN-MADE JJ
SCALING VBG NN
LETTER-WRITING JJ
THANKFULLY RB
CORROBORATE VBP
DEPOSED VBN
8-10 CD
8-11 CD
ENGLISH NNP JJ NNS
LAIDIG NNP
MATERIALISTIC JJ
SENSHUKAI NNP
SHORTENED VBN
SIROTA NNP
FREUDTOY NNP
APPRAISE VB
JONRON FW
FRANTICALLY RB
IMBALANCE NN
DESPERATE JJ
WEB NN
INVESTIGATOR NN
KELLER NNP
MCCHESNEY NNP
WED VBN
WEE NNP
100.05 CD
KELLEY NNP
SOGGY JJ
TASSEL NN
FABERGE NNP
NURSE NN
JERGENS NNP
WET JJ NNP
MELANTO NNP
2,250,000 CD
AUSTRALIAN JJ NNP
215.86 CD
OCCUPATION NN
SALINGER NNP
KORI NNP
PASTDUE JJ
ONE-POINT JJ
ZIEBARTH NNP
1-TO-1 JJ
YIPPIES NNPS
WINFREY NNP
CROWLEY NNP
OCEAN NNP NN
WASHBURN NNP
MECANIQUES NNP
VOLUNTEERISM NN
TRANSPORTATION-COST JJ
COMPOUNDED VBN VBD
WREST VB
QUAKE NN
62ND JJ
SHRUNK VBN
QUIBBLING VBG
COMMANDING JJ VBG
ROMAN NNP JJ NNPS
KEVIN NNP
CHATTERJI NNP
REPETITIVE JJ
COPIOUS JJ
CONFRONTATION NN
TELESCOPE NN NNP
LINE-ITEM JJ
NOT-FOR-PROFIT JJ
ROULAC NNP
VIGOR NN
63.1 CD
TRIPLING VBG
FORECASTS NNS VBZ
63.5 CD
NANTUCKET NNP
63.6 CD
ELVADOR NNP
63.8 CD
LOCALE NN
63.9 CD
ACTIONS NNS
DELIVERED VBN VBD
ARTIST NN NNP
U.S.-JAPANESE JJ
DANCE NN VB NNP
AUTO-MAKING NN
LOCALS NNS
SCRABBLE NNP
190.58-POINT JJ
WHO WP
ADJECTIVE NN
RIDICULE NN
DETERIORATING VBG JJ
ZOOLOGY NN
RESERVING VBG
PROJECTING VBG
EMBARCADERO NNP
65-DAY JJ
WHY WRB
DEPOSIT NN NNP VB
BIBLE NN JJ NNP
NONEXISTENT JJ
DARKROOM NN
BRISTOL-MEYERS NNP
TENDENCIES NNS
PROCEED VB VBP
PUGET NNP
WIG NN
REINMAN NN
TOAST NN
WORKING-CAPITAL JJ
WIN VB VBP NN
FLINGING VBG
DANDY JJ
WIS NNP
WIT NN
COUGHING VBG
MISPERCEPTIONS NNS
DETERIORATION NN
SLUMPED VBD VBN
SANGUINE JJ NN
FULLSCALE JJ
PROJECTION NN
WELL-ENTRENCHED JJ
GENERALE NNP
PROBLEMATICS NNS
GENERALI NNP
MEDIEVAL JJ
RESOLD VBN VBP VB
QUANT NN
857-161 CD
MEDICAL-SUPPLY JJ
IMPASSIVENESS NN
BICKEL NNP
MID-JULY NN
1,300,000 CD
QUEENAN NNP
REDUCING VBG
CONTINENTALS NNS
REINSTALLED VBN
YAMAGUCHI NNP
TISCH NNP
AIDS-RESEARCH JJ
INAPPROPRIATE JJ
DUPES VBZ
HUMPHREYS NNP
INCLINED VBN JJ
KC-135S NNS
SPECULATED VBD VBN
TROLLEY NN
STRONG-WILLED JJ
BETTER-OFF JJ
NEEDS VBZ NNS
PEDAGOGUE NN
IDENTITY-MANAGEMENT NN
NEEDY JJ
2.9428 CD
LEAGUERS NNS
2.9429 CD
MID-JUNE NNP
ROULET NNP
780,000 CD
DISCONTINUING VBG
AMSTERDAM NNP NN
MARCHAND NNP
RUNNERS-UP NNS
BENCH NN
MOJAVE NNP
FIGURE NN VB VBP NNP
99-04 CD
WLF NNP
OAKAR NNP
MISQUOTING VBG
ACCOMPANIED VBN VBD
ESCUDOME NNP
CHUCKED VBD
DERAILED VBN
BENDA NNP
TOOL-AND-DIE JJ
OIL-PATCH NN
HAMPSHIRE NNP
ACCOMPANIES VBZ
TECHNOLOGY-LICENSING JJ
STRUGGLING VBG JJ
SPINNEY NNP
ORPHAN JJ
DISSATISFACTION NN
STATISTICALLY RB
ODDS NNS NNPS
49.1 CD
VIABILITY NN
49.2 CD
49.3 CD
49.4 CD
49.5 CD
49.6 CD
DEBTS NNS
ARLEN NNP
49.7 CD
49.8 CD
VIDEOTAPES NNS
49.9 CD
REIMBURSEMENTS NNS
ADJUSTERS NNS
12,822,563 CD
SILICONE NN
ARLES NN
PRIMARILY RB
UNORTHODOX JJ
SCIENCE NN NNP
1991-1996 CD
COMPARISON NN
SHORT-CHANGING NN
1991-1999 CD
BARGAIN-HUNTING NN JJ
HEADRESTS NNS
BRADLEY NNP
SOURCES NNS
COMPANION NN JJ NNP
11,450 CD
BRIBED VBD VBN
100.96 CD
46.125 CD
TROUPES NNS
DEBUT NN VB
1,263,000 CD
MARINE-TRANSPORT NN
BRIBES NNS
COMICALLY RB
QUESTIONED VBD VBN
OUSLEY NNP
UNAUTHORIZED JJ
CUDDLES NNP
IN-STATE JJ
WAL-MART NNP
PUNDITS NNS
HOFFMANN-LA NNP
BENEFICIARIES NNS
ALBANIANS NNS
MIKULSKI NNP
UPHOLDING VBG
GOODIES NNS
WOE NN
SOLICITORS NNS
158,863 CD
EVIDENT JJ
MODERNIZED JJ VBD VBN
WON VBD VBN NN NNP VBP NNS
CLEAN-UP JJ
WOO VB NNP
SZETO NNP
DISCLOSE VB
LOCATE VB VBP
CREDIT NN NNP VB VBP
WOW UH
HOW-TO JJ
DRIVERS NNS
PREVIEWING VBG
TREVOR NNP
CATCH VB NN VBP
HOUSEWORK NN
OH-HYUN NNP
MX-MISSILE NN
SECOND-STORY JJ
CERVANTES NNP
FACSIMILE JJ NN
PARLIAMENT NNP NN
TUNICK NNP
CAMRYS NNPS
NONFINANCIAL JJ
DICTATORIAL JJ
ZIMBABWE NNP
UNAMORTIZED JJ
AGNEW NNP
HODGSON NNP
OAKES NNP
INTOLERANCE NN
SALEMBIER NNP
HUNTLEY-BRINKLEY NNP
WPP NNP
INCREMENTS NNS
TOLL-TELE-PHONE JJ
CANCER-SUPPRESSING JJ
PRE-TESTED VBN
755,000 CD
RESORT NN VB NNP VBP
MIRINGOFF NNP
HIGH-POWERED JJ
50-YEAR JJ
TAX-WRITERS NNS
PRUNED VBN
BREACHED VBD VBN
VICINITY NN
MURDER NN
REJECTS VBZ
HESITATING VBG
EXTRUSION NN
SOOTHE VB
HORTICULTURAL-PRODUCTS NNS
1-800-453-9000 CD
ANALYZED VBD VBN
EATING VBG NN JJ NNP
RUMPLED JJ
COMMUTE NN
WAGGONER NNP
MCCABE NNP
BREACHES NNS
CALCIUM NN
ARROWS NNS
PLAYSKOOL NNP
ONCOR NNP
HEEBIE-JEEBIES NNS
NEWSWORTHY JJ
GENERATE VB VBP
PRUFROCK NNP
AMERICANIZED VBD
ACCUSING VBG
SOLICITOUS JJ
PRO-GORBACHEV JJ
CATER VB VBP
4-KILOBIT JJ
FRESHNESS NN
FEUDAL JJ
VIDEOCASSETTE NN
SCANDAL NN
AGRIPRODUCTS NNS
HESITATION NN
HANDS-ON JJ
ROCKFORD NNP
EXPOSURE NN
2.9495 CD
WICKEDLY RB
COFFIELD NNP
UNDERMINING VBG
SLIMMING VBG
GAUGING VBG
WALTERS NNP
RUMACK NNP
EQUIMENT NN
MANIC-DEPRESSIVE NN
GRENFELL NNP
10.485 CD
UNDERPINNING VBG
WSJ NNP
PEPPERED VBD
OVERNIGHT JJ RB
COMMEMORATE VB VBP
19\/32 CD
DANNY NNP
ARROYO NNP
585,000 CD
ALERTED VBD
PLAID-FLOORED JJ
100,000-GUEST JJ
HEATHROW NNP
WELL-WISHERS NNS
MINISTRIES NNS
UNSUSPECTING JJ
STUBBED VBN
DISCORDANT JJ
LOW-POWER JJ
GRENIER NNP
WTD NNP
TREASURY-BOND JJ
MACROCHEM NNP
SNAFUS NNS
MCLEAN NNP
KOREAGATE NNP
WTI NNP
DICTATING NN
NUANCE NN
9,500 CD
CHAMPS NNP NNS
TUCKED VBN VBD
COMPUTER-PRINTER NN
TUMBLING VBG
LINCOLN-MERCURY NNP
WELCOMING VBG
TAKASHI NNP
HEALTH-MAINTENANCE NN
FUNCTION NN VBP VB
SURGED VBD VBN
CONSERVATIVES NNS NNPS
EYE-POPPING JJ
TUCKER NNP
SCHOOL-LUNCH NN
HEALTH-COVERAGE NN
SHORT-LIVED JJ
LOUISE NNP
AGOGLIA NNP
CHRIS-CRAFT NNP
GROTTOES NNS
SWIVELING VBG
SURGES VBZ NNS
ACCEPTED VBD VBN JJ NNP
SPLIT-FINGERED JJ
EXTRADITIONS NNS
DICTATION NN
ESPRE NNP
SPECULATOR NN
FITTEST JJS
TIREMAKER NN
WAYNE NNP
GARDENS NNPS NNP NNS
PROTESTORS NNS
PSYCHICS NNS
BOOKKEEPER NN
FOR-PROFIT JJ
959.3 CD
PROBABILITIES NNS
PINNACLE NNP
RESETTABLE JJ
PROCEEDED VBD VBN
401-18 CD
FEUDED VBD
ROMPS NNS
POSTCARDS NNS
HEALTH-PRODUCTS NNS
BLED VBD
1,068,000 CD
SLITHERING VBG
AUTONOMOUS JJ
705.6 CD
CORPORATES NNS
MUSHROOMED VBD VBN
THREATENED VBN VBD JJ
CRIMPED JJ
DISPLACE VB
COLOMBIANS NNPS
CONTINGENCIES NNS
STREAM-OF-CONSCIOUSNESS NN
BLEW VBD
UNPROFITABLE JJ
AUTO-EMISSION NN
1761.0 CD
CRIMINAL JJ NN NNP
JOTARO NNP
SUSPECTED VBN VBD JJ
EMULATED VBN
COST-SHARING NN JJ
REPLACEMENT-CAR NN
IMPERIAL NNP JJ
MICRONIC NNP
DELLUMS NNP
APRIL NNP
TANDEM NNP NN JJ
PHACOFLEX NNP
BENNY NNP
VNET NNP
WAITED VBD VBN
COURT-APPOINTED JJ
PROCESS NN VB VBP
1263.51 CD
INAPPROPRIATELY RB
1937-40 CD
SUPERIORS NNS
U.S.-U.K. JJ
GLEANED VBN
CLEARANCES NNS
TWIN-JET NN
VESTS NNS
TOBRUK NNP
PANDERING VBG
JIOTTO NNP
CHARACTERISTICALLY RB
MARKET-REFORM JJ
625.4 CD
IRISHMEN NNPS
VIOLINIST NN
8.525 CD
30-SHARE JJ CD
CONSTRAINS VBZ
CONSTRAINT NN
SIDESHOW NN
GUNMEN NNS
ENACT VB
MCCAIN NNP
BRENDA NNP
REORIENTED VBN
124,000 CD
TREYBIG NNP
CATERED VBD
SEASHORE NN
PARACHUTE VB NN
POLICEWOMAN NN
WYO NNP
STIEGLITZ NNP
VEHEMENTLY RB
BUFFING VBG
621,624 CD
CROPPING VBG
HELMSLEY NNP
WOHLSTETTER NNP
POPPEA FW
CATERER NN
BUSINESSMAN NN
POLLUTERS NNS
ISSUED VBN VBD JJ
OIL-FINDING JJ
LANTOS NNP
LUTHER NNP
0.6287 CD
CORNEA NN
AGNOS NNP
PHONE NN VBP
BASKET NN NNP
ISSUER NN
TRADITIONAL JJ NNP
ISSUES NNS NNPS VBZ NNP
CLOSURE NN
545.3 CD
EMPLOYEE-HEALTH NN
CORNEL NNP
PAINTED VBN VBD JJ
HARVESTED VBN
BLIP NN VB VBP
ERODING VBG
CORNER NN VB JJ
SCHRODERS NNP
FLAGS NNS
PHONY JJ NN
MINIMILLS NNS
BURBLES VBZ
STOCK-APPRECIATION NN
CORNEY NNP
ELITISTS NNS
ACCOMPANIST NN
BARTHOLOW NNP
LOGGERS NNS
REAGAN-ERA JJ NN NNP
PAINTER NN NNP
FACED VBN VBD
TUNING VBG
LEWALA NNP
DUPUY NNP
LUMBER-LIKE JJ
CRABB NNP
HODGES NNP
MISTAKEN JJ VBN
MISTAKES NNS
SPARROWS NNP
FASSBINDER NNP
FACES VBZ NNS
EXTERNAL JJ NNP
DECAY NN
97-NATION JJ
WEEKDAY NN
YORK-MOSCOW NNP
O'NEILL NNP
MUSCOLINA NNP
CRABS NNP NNS
2569.26 CD
FAMILY-OWNED JJ
MCCALL NNP
SHIRER NNP
IVAN NNP
1937-87 CD
CHANDRA NNP
REQUIRING VBG
EMPEROR NN NNP
ISLAND-FANTASY JJ
SPEAKERS NNS
FURLOUGHS NNS
EDUCATED VBN
BROTHERISM NN
CRACK VB NN VBP
MONTERREY NNP
BRONFMANS NNP
REDOING VBG
LONGSTANDING JJ
WHITE-SPIRIT NN
MCGLADE NNP
OVERTHROWING VBG
FLAIR NN
TECHNICALLY RB NNP
CONDITIONAL JJ
EMPLOY VB VBP
FAST-GROWING JJ
211.6 CD
ESCALATING VBG
FOCUSING VBG
APRON NN
N.J.-BASED JJ
WRENCHING JJ VBG
8.575 CD
PATRICELLI NNP
BUSINESSMEN NNS
NARRATION NN
CLASSICAL JJ
MCCANN NNP
WESTERNERS NNPS
CHEVRON NNP
FUMPERED VBD
WALESON NNP
ACETYLENE NN
PASTELS NNS
MISFORTUNES NNS
TWO-HUNDREDTHS NNS
YANES NNP
FLAVIO NNP
BUZZER NN
ESCALATION NN
BUZZES VBZ
CONSULTING NN VBG NNP JJ
DEFEATING VBG
RESTORED VBN VBD
AETNA NNP NN
SNOWBALLED VBD
1247.87 CD
SUCCUMBING VBG
GLIMPSE NN
ADJUSTMENTS NNS
RESTORER NN
131.3 CD
FLAKY JJ
RESELLS VBZ
CONCERNS NNS VBZ
WISELY RB
PERCENTAGE NN
155,650,000 CD
CREDIT-EASING NN JJ
DOMINGOS NNP
AVALON NNP
U.S.S.R. NNP
WHACKY JJ
PIRATED VBN
SINGLE-DAY JJ
CRAFT NN VB
AGRESOURCE NNP
FUEL-ECONOMY NN
POLLUTION-CONTROL JJ NN
BLASTING VBG
GREENFIELD NNP NN
PIRATES NNS
RESPONDING VBG
TELEXES NNS
RITTER NNP
TOBIN NNP
BASEBALL-CARD JJ
IVEY NNP
BLOC NN NNP
MONARCHY NN
CLAIMS-PROCESSING NN
MULTIMILLION-POUND-PER-YEAR JJ
FLAME NN
DECOYS NNS
ADHERE VB
PHOTO NN NNP JJ
PARAKEET NN
EFFICIENT JJ
KILPATRICK NNP
PORTENDS VBZ
CONDITIONED VBN
BLOT NNP
PERISHABLES NNS
BLOW NN VB
WILLMAN NNP
BLOOMING VBG
WEEKNIGHTS NNS
CRUISER NN
CONDITIONER NN
GEOFFRION NNP
EX-MEMBER NN
SUNSET NNP
ROBUSTLY RB
VIEWERS NNS
WENDY NNP NN
ESTABLISHED VBN VBD JJ
DATSON NNP
NEGLECTED VBN VBD JJ
KPMG NNP
DESTINED VBN
DESERT-BATTLE JJ
X-RAY NN
PROFITTAKING NN
DEGENERATE VB
MCLEOD NNP
RETAKING VBG
ESTABLISHES VBZ
WELL-TEMPERED JJ
KELMAN NNP
RESOLVING VBG NNP
15-MONTH JJ
PRICE-SUPPORT JJ
FAT-TIRED JJ
GENERATING NN VBG NNP
KROLL NNP
SMELLED VBD
CRAIG NNP
YANIV NNP
UTSUMI NNP
SUPPLIERS NNS
REDMOND NNP
DEACTIVATES VBZ
2135.5 CD
BASEMENT NN
RESTRAINED JJ VBN VBD
BRANCH-BY-BRANCH RB
RIVIERA NNP
DISTURBANCE NN
DAKOTA NNP
B'GOSH NNP
YUPPIE NN
HUAQIONG NNP
FUELS NNS
SEMINARS NNS
TRUDGING VBG
SCREAMED VBD
THURSDAYS NNPS
LOOKEE-LOOS NNS
GENERATION NN NNP
BALLOONED VBD VBN
ONGOING JJ
HOCKNEY NNP
PREACH VB VBP
CRONIES NNS
FLAPS NNS
INTERSECTION NN
HELLIESEN NNP
RELAUNCHED VBN
KRONA NN
BARGAINED VBD VBN
ADDITIVES NNS
LIQUIDITY NN
DRYWALL NN
MISTAKENLY RB
ABSOLVING VBG
8.00 CD
8.01 CD
8.02 CD
8.03 CD
FLAVOR NN
8.04 CD
8.05 CD
NON-GM JJ
NARRATIVE NN JJ
8.06 CD
DEBT-EQUITY JJ NN
8.07 CD
COUNCIL NNP NN
PEACE-KEEPING NN JJ
HIATUS NN
8.08 CD
CUCAMONGA NNP
8.09 CD
ELGIN NNP
COST-OF-LIVING JJ NN
GOSPLAN NNP
U.N.-SUPERVISED JJ
EX-PRESIDENT NNP NN JJ
ACCUSED VBN VBD NNP
117.2 CD
RESTLESSLY RB
117.3 CD
CONCERTO NNP
117.7 CD
117.9 CD
CONCERTS NNS
ACCUSER NN
64,000 CD
ACCUSES VBZ
8.10 CD
SUNGLASSES NN NNS
8.11 CD
8.12 CD
FLARE VBP
DECKS NNS
8.13 CD
8.14 CD
PROPRIETER NN
NONFLAMMABLE JJ
8.15 CD
SCREWED VBD VBN
EXPIRE VB VBP
8.16 CD
8.17 CD
8.18 CD
8.19 CD
JERSEY-SALEM NNP
STREAKED VBD
647.33 CD
DAYWATCH NNP
SYMPTOM NN
AUTHENTICITY NN
PORCELAIN NN
NIGHTCLUB NN
STONEWALLED VBD
BRAZEN VB NNP
JOURNALISM NN NNP
TREATMENTS NNS
BLUE JJ NNP NN
8.20 CD
OUSTING VBG
CLASSIFIED-AD NN
8.21 CD
EGALITARIANISM NN
8.22 CD
JOURNALIST NN
8.23 CD
8.24 CD
AVAIL NN
8.25 CD
FLASH VB VBP NN
8.26 CD
8.27 CD
BLUM NNP
8.28 CD
8.29 CD
TASTER NNP
MAHOGANY NN
TASTES NNS VBZ
BLUR VB
MODIFICATION NN
CRAMS VBZ
OVER-THE-COUNTER JJ NN RB
EDUCATOR NNP
INTERSPERSED VBN
CONNOISSEUR NN NNP
DESIGNING VBG NNP
QUASI-PARLIAMENTARY\/JUDICIAL JJ
SCULLY NNP
MAYORALTY NN
SIMULATE VBP
STATELY JJ
INTERSPERSES VBZ
VICARS NNS
8.30 CD
CRANE NNP NN
DESTROY VB VBP
8.31 CD
8.32 CD
8.33 CD
FOUGHT VBD VBN
8.34 CD
8.35 CD
CRANK VB
8.36 CD
8.37 CD
8.38 CD
RECITING VBG
MICRONYX NNP
QUARRELING VBG
FLATS NNS NNP
ESPIONAGE NN
MEGA-MERGERS NNS
GLOBAL-FUNDS JJ
CHANCE NN VBP
CONCOMITANTLY RB
CO-FOUNDED VBD
VIHON NNP
TRAILED VBD VBN
64.1 CD
ANTONIA NNP
8.40 CD
64.2 CD
10-STEP JJ
8.42 CD
8.43 CD
64.5 CD
GHOSTBUSTERS NNS NNP
TRAMPLING VBG
8.44 CD
INSPECTIONS NNS
8.45 CD
8.46 CD
Y&R NNP
8.47 CD
64.9 CD
CO-FOUNDER NN
8.48 CD
FABI NNP
TRAILER NN NNP
8.49 CD
MILLION-SHARE JJ
INSPECTING VBG
JUDGESHIPS NNS
BREEZIER JJR
ANTONIO NNP
HOME-MARKET JJ
CONSERVATIVE-LED JJ
REASONS NNS VBZ
HINMAN NNP
GENERAL JJ NNP NN
BANCOKLAHOMA NNP
VIDEOTAPE NN VB
SATISFY VB
SENIORS NNS NNP
DEVICES NNS NNPS NNP
MONEY-BACK JJ
8.50 CD
DECOR NN
8.52 CD
8.53 CD
ISRAELI-PALESTINIAN JJ
8.54 CD
CONRADES NNP
FACE NN VB VBP JJ NNP
8.55 CD
STOP-PAYMENT NN
8.56 CD
DECOY NN
8.59 CD
DENOUNCED VBD VBN
PHARMACEUTICALS NNS NNP NNPS
RECEPTORS NNS
IMPROBABILITY NN
INSPECTION NN NNP
FACT NN
JERELL NNP
EXTRACURRICULAR JJ
XIA NNP
BRAZIL NNP
RICARDO NNP
FOREIGN-INVESTMENT JJ
WORDED VBN
39,000 CD
HARCOURT NNP
CHANEL NNP
8.60 CD
FADA NNP
8.61 CD
EXPENDED VBN
FACTO FW JJ
8.62 CD
8.63 CD
8.64 CD
PALUMBO NNP
FADE VB
8.65 CD
FACTS NNS
EXPLOSIVES NNS
PLEASING JJ NN VBG
VEGETATIVE JJ
116TH NNP
8.68 CD
SHOULDERS NNS
SHIRTS NNS
FLAWS NNS
FADS NNS
CONSUMERS NNS NNPS NNP
INSTITUTING VBG
UNDERTAKE VB
COMERICA NNP
FOWARD JJ
130.875 CD
FIRST-PHASE JJ
GRAVITY NN
SPHERE NN
EXCORIATED VBN
PRE-QUAKE JJ
JEREMY NNP
8.70 CD
MATTHEWS NNP
2.9511 CD
EARNERS NNS
8.74 CD
8.75 CD
AIR-FREIGHT NN JJ
8.77 CD
8.78 CD
8.79 CD
EXCLUSION NN
SOFTWARE-DEVELOPMENT NN
DOUBLE-B-PLUS JJ
PICTURE NN NNP VBP
SALTED VBD
LESS-CONSERVATIVE JJ
XIAOPING NNP
CIRCUMVENT VB
CRARY NNP
DOUBLE-HAMBURGER NN
CHANGE NN VB VBP NNP
TATSUNORI NNP
INSTITUTION NN NNP
STRESSED VBD VBN
8.80 CD
REBOUND NN VB
8.81 CD
8.82 CD
CRASH NN VB JJ NNP
VOLATILITY NN
ARMCO NNP
ITTLESON NNP
EARNEST NN JJ
TITANS NNS
8.85 CD
8.87 CD
TEQUILA NNP
8.88 CD
INTERTITLES NNS
RUSTLING NN
OILWELL NNP
PAWTUCKET NNP
IVORY NN NNP JJ
BLACKLIST VB
OECD NNP
STRESSES VBZ NNS
CRASS JJ
75-CENTS-AN-HOUR NNS
40-MEGABYTE JJ
CONRADIE NNP
CRUCIALLY RB
DISPLAYS NNS VBZ
TEENAGER NN
MULVOY NNP
APPLICABLE JJ
142-143.50 CD
8.90 CD
MEANTIME NN RB
EARTH-MOVING JJ
INCONCEIVABLE JJ
8.95 CD
8.96 CD
DIVIDEND-RELATED JJ
8.98 CD
KISHIMOTO NNP
EXCEEDED VBD VBN
8.99 CD
ABSORB VB VBP
SPOOKS NNS
FIGHTER-BOMBERS NNS
ANTI-RECESSION JJ
99.14 CD
ARMED VBN JJ NNP
EARNINGS-PER-SHARE JJ
DEFAMATORY JJ
ELOQUENT JJ
FACE-AMOUNT JJ
ARMEN NNP
FAHD NNP
SPINOFF NN
ANTHOLOGY NN
ROSENBLUM NNP
OFF-HOURS NNS
MENSTRUAL JJ
WHITE-COATED JJ
COINCIDE VB
PRAIRIES NNS
DENNIS NNP
KNOWINGLY RB
MINICAR NN JJ
99.23 CD
SWEDEN NNP
ALGIERS NNP
CONCENTRATIONS NNS
DOGGED VBN JJ VBD
SWEDES NNS
DIPPING VBG
MCGOWAN NNP
EMOTIONALLY RB
HYPERVENTILATING NN
CRAVE VBP
282.08 CD
DIPOTASSIUM NN
UNBORN JJ NN
PROPRIETOR NN
OUNCE NN
ALASKAN JJ
COMPOSERS NNS
SPECIAL-INTEREST JJ NN
FAIL VB VBP
BALLERINAS NNS
OUTPOST NN
DISPLEASED JJ
9.008 CD
DWINDLING VBG
FAIR JJ NNP NN
DISTANCING VBG NN
FAIT NN
LEATHER NN
99.35 CD
LANDOWNER NN
STARKOV NNP
LESS-ESTABLISHED JJ
RECONCILING VBG
DISPLEASES VBZ
CREATURES NNS
10-A-SHARE JJ
400,000 CD
4:02 CD
DELTEC NNP
CRAWL VB NN
ADMISSIBLE JJ
GENERIC JJ
NONDEDUCTIBLE JJ
SOICHIRO NNP
10,000-CIRCULATION JJ
ACCORDINGLY RB
FINSBURY NNP
LIFES NNS
62.625 CD
LEUBERT NNP
CIRCULATING VBG
CONTACTED VBN VBD
FAKE JJ NN
RENOUNCING VBG
SUBJECTED VBN
PROGRAM-DOMINATED JJ
CROSS-BLENDING JJ
FAILURES NNS
MIRACLE NN
ALLURING JJ
ORNETTE NNP
DISTRUST NN
REXINGER NNP
AUTOMOTIVE-PARTS JJ
FERRYING VBG
UNPERFORMED JJ
NEWSPRINT NN
11,580 CD
ROLING NNP
99.58 CD
RESTRAINTS NNS
11,586 CD
LONG-DORMANT JJ
HARRIMAN NNP
BILLION-A-YEAR JJ
EXCLUSIVE JJ
DEBASEMENT NN
OVERHANG NN
BUZZWORDS NNS
CIRCULATION NN NNP
COMPULSORY JJ
SERVICE-CENTER NN
FALL NN VB VBP
BANERIAN NNP
CREDIT-RATINGS NNS
HOVNANIAN NNP
99.60 CD
PLAYTEX NNP
99.64 CD
GRUBMAN NNP
JAMMED VBD VBN JJ
230,000 CD
4:30 CD
PAROCHIAL JJ
NONESSENTIAL JJ
W.A. NNP
CRAZE NN
DEAVER NNP
COLLAGE NN
HUMAN-RIGHTS JJ NNS NN
FAME NN NNP
ZIPPER NNP
MODULATE VBP
DRAGON NNP
SHOEMAKER NN
RESILIENCE NN
YOSHITOKI NNP
CANDLESTICK NNP
CRAZY JJ NNP
CARBIDE NNP
99.75 CD
SINOPOLI NNP
DROUGHT-STUNTED JJ
DIRECTIVES NNS
RASKOLNIKOV NNP
LAWYER NN NNP
MELDS VBZ
INTERMEDIATE-RANGE JJ
SPINOLA NNP
RESILIENCY NN
MAREHAM NNP
FANG NNP
RIDGES NNS
POST-EARTHQUAKE JJ
MAILING NN VBG
TITLE NN NNP
99.80 CD
FANS NNS VBZ
FINANCIALLY RB
OCEANSIDE NNP
99.85 CD
CONSTITUENCIES NNS
RECKLESSNESS NN
REGUMMED VBD
THREE-STAGE JJ
DORENA NNP
ARCHIBALD NNP
LEARNED VBD VBN
DOCTORS NNS
BRICKS NNS
SIZED VBD
COUNTDOWN NN
BLINDNESS NN
TWO-BUTTON JJ
PELL-MELL NN
EDMONTON NNP
ORDERED VBD VBN
99.90 CD
EAVESDROP VB
ASHURST NNP
99.93 CD
BRAIN-WAVE JJ
CHALKED VBN
RACKETS NNS
SIZES NNS
99.95 CD
CRAFTING VBG
SALTON NNP
BARK-NIBBLING JJ
KAN.-BASED JJ
46,835 CD
HOLLISTER NNP
W.D. NNP
TASTIER JJR
STEAKHOUSE NN
99,385 CD
RITTLEMANN NNP
PREFERENCE NN
TICKETING VBG
PROFITEERS NNS
MOSCOW-BASED JJ
CHALLENGED VBN VBD
SIX-WEEK JJ
LIDDLE NNP
PORTRAYALS NNS
WIRTHLIN NNP
PERELMAN NNP
CHALLENGER NNP
CHALLENGES NNS VBZ
KESSLER NNP
71,895 CD
HITACHI NNP
REMORSE NN
FOURTH-LEVEL JJ
480.4 CD
RENEWING VBG
TURBOPROPS NNS
FOREIGN-TRADING JJ
MOTORCYCLE NN NNP
LEOMINSTER NNP
ANTI-SEMITISM NNP
EXPLOSIVELY RB
NON-HORTICULTURAL JJ
BANKRUPTCIES NNS
MACHIGUENGAS NNPS NNS
INVENTIONS NNS
MOTORFAIR NNP
CONDEMNS VBZ
ASSESSMENTS NNS
POTENT JJ
FARE NN VBP VB
WRITER\/PRODUCERS NNS
CONCOMITANT JJ NN
ARMOR NN
LARGE-DIAMETER JJ
HAAGEN NNP
TAX-CUT JJ
FARM NN NNP VB
COUNTERTERRORISM NN
MONTEDISION NN
FARR NNP
HOMEWORK NN
MODICUM NN
SYSTEMIC JJ
110-LAWYER JJ
KAKITA NNP
RECONSIDERED VBN
266.66 CD
W.G. NNP
CHOREOGRAPHED JJ
FASB NNP
SUPERVISING VBG
626.3 CD
FACTOR NN VB
CHANTS NNS
GUNNED VBN
8.625 CD
PREFLIGHT JJ
OVERHAUL NN VB
COKELY NNP
NON-CAFFEINE JJ
FASO NNP
CHOREOGRAPHER NN
RE-SUPPLIED VBN
FAST RB JJ
GUNNER NN NNP
PLAYMATES NNPS
ARBITRATES VBZ
NERVOUSLY RB
TIRELLO NNP
W.H. NNP
UNRAVEL VB
FATE NN NNP
ASSAILANT NN
RELEVANT JJ
RAPATEE NNP
IGNORE VB VBP
PERSONAL JJ NNP NN
SUPERVISION NNP NN
SAMOVARS NNS
BEQUESTS NNS
FATS NNS
INTERVIEWS NNS
TOMBRELLO NNP
TUBE NN NNP
FLAWED VBN JJ
KIDNAP VB
RADIATION NN NNP
W.I. NNP
APPROXIMATES VBZ
TUBS NNS
42-BRANCH JJ
PASTIMES NNS
POZEN NNP
LUGGING VBG
BOISVERT NNP
VELOCITY NN
20%-OWNED JJ
APOGEE NNP
ZUKIN NNP
VOID NN VB JJ
FADED VBN VBD
FAUX JJ
TUCK VB
HUSBANDS NNS
46,892 CD
MELLO NNP
W.J. NNP
WOLVES NNS
VOIR FW
22-RATED JJ
FADES NNS
GOBBLING VBG
NEGATIVES NNS
THEN-SPEAKER JJ
RUMBLE VBP
151.20 CD
IWAI NNP
MOTIVATED VBN JJ
143.08 CD
PARKSHORE NNP
YEAR-BEFORE JJ
RITUAL NN
EXPECTANCY NN
SCRIMPED VBD
POST-OCT NNP
CHARLATANRY NN
TWIGGY-LOOKING JJ
ONCE-A-DAY JJ
ORDERLY JJ RB
MUZAK NNP
FAWN NNP
DOGFIGHT NN
212.1 CD
TALKED VBD VBN
RENAME VB
212.5 CD
NON-`` ``
PRIVATE-SECTOR JJ NN
SUNTAN NN
TITUS NNP
HOLDS VBZ
IMPRISONMENT NN
OUTDISTANCED VBN
ENCASING VBG
REPUTATION NN
DENNEHY NNP
PORTABLES NNS
HEATERS NNS
HOLED VBN
135.09 CD
COLLARS NNS
OPTING VBG
RELICENSING NN
DIFFICULTY NN
10-POINT JJ
TASTING NN
FLUORIDE NN
100-YEAR-OLD JJ
HOLES NNS
VOLK NNP
PRE-FREUDIAN JJ
KIDNEY NN
GENTEEL JJ
8.685 CD
SOCIOECONOMIC JJ
REFUSERS NNS
NOBLEMEN NNS
MIDDLE-PRICED JJ
COMPENSATED VBN
132.1 CD
FABRICATIONS NNS
OPTION NN VBP NNP
BREAKTHROUGHS NNS
132.6 CD
PURGING VBG
132.8 CD
HOLLISTON NNP
WATSON NNP
132.9 CD
ATTACHED VBN VBD JJ
KILLS VBZ
CONSUMMATED VBN
GRAY-FLANNEL NN
W.N. NNP
LIFTS NNS VBZ
COMPENSATES VBZ
INTERMARKET JJ
REFINED-PETROLEUM-PRODUCTS JJ
GROUNDBALL NN
127.03 CD
FIRST-MORTGAGE JJ
PLATEAU NN
ATTACHES VBZ
21-A-SHARE JJ
CAUSE VB NN NNP VBP
IMPERIALISTS NNS
COCONUT NNP
DISTURBING JJ VBG
ENCORE NN
THEN-21 JJ
BACKGROUND NN
RUINED VBN
PACEMAKER NN
ENVIRONMENTAL-IMPACT JJ
PRESIDENT NN NNP
FOLDED VBD VBN
CAR-SAFETY JJ
ROCKET-PROPULSION NN
BURGEONING VBG
CONCEIVED JJ VBD VBN
HOT-DOG JJ
BRAVURA NN
SANDWICHED VBN VBD
ENORMOUSLY RB
CONCEIVER NN
FRIEND-OF-THE-COURT JJ
SUBURBS NNS
SANDWICHES NNS
CERVICAL JJ
GRIPES NNS VBZ
143.60 CD
CHANCERY NNP
28-OUNCE JJ
SEDUCE VB
TRILLS NNS
RHYTHMICALLY RB
AGGREGATES NNS
DUVALIER NNP
12,000 CD
RE-ENTER VB
PREVIOUSLY RB
BRUSHING VBG
PLEAD VB
MANLEY NNP
STIMULATORS NNS
BALANCED JJ VBN
BLACKED-OUT JJ
275-A-SHARE JJ
INVESTMENT-COUNSELING JJ
C-12 NN
PLEAS NNS
C-17 NN NNP
BALANCES NNS VBZ NNP
DEPICT VBP VB
ARBITRATOR NN
ZAIRE NNP
KINDERTOTENLIEDER FW
MIOXIDIL NN
PAY-TV NN
BIDEN NNP
CORONA NNP
THEN-52 JJ
GORBY NNP
MELTS VBZ
W.R. NNP
CABANNE NNP
143.80 CD
GORCE NNP
BITE-SIZED JJ
82-DAY JJ
143.88 CD
ENRICHING VBG
ASSOCIATE JJ NN VBP NNP
MAXIM NN NNP
COLLECTIVES NNS
OILMAN NN
FORTUNE NN NNP
PREDICTIONS NNS
WORKSTATION NN
MINEOLA NNP
ATHLETE NN
USELESSLY RB
1\/2-YEAR JJ CD
JOURNALS NNS NNPS
CHECKS NNS VBZ
143.93 CD
2,331,100 CD
HANDOUT NN
RESEARCH-BASED JJ
ZAITA NNP
GRUDGINGLY RB
VOSE NNP
118.6 CD
ALLOCATING VBG NN
BRITISH-BASED JJ
MILBERG NNP
HUMANISM NN
INNOCUOUS JJ
W.T. NNP
HOLLY NNP
HUMANIST JJ
KERCHIEFED JJ
LITERAL-MINDED JJ
ALLIED NNP VBD JJ
VOSS NNP
LAMBASTED VBD
BRAINCHILD NN
FSLIC NNP
GORED VBN
DOLLAR-DENOMINATED JJ
REFORMED NNP VBN
STEVEN NNP
TUNA NN
ALLIES NNS
COMMERCIALIZATION NN
TUNE NN VBP VB
LAMBASTES VBZ
NOBREGA NNP
VOTE NN VB VBP
IGNOBLE JJ
REFORMER NN JJ
MANEUVER NN VB
YEH NNP
ALLOCATION NN
SCRAMBLE NN VBP
BOURBONS NNS
LEROY NNP
YEN NNS NN
ACROSS-THE-BOARD JJ NN
HUMANITY NN
ROOT-CANAL NN
PERSONALIZED VBN JJ
YES UH RB NNP
SIZWE NNP
YET RB CC
CROWNED VBN
SUGGESTS VBZ
YEW NN NNP
DECEMBER NNP
BASE-PRICE NN
DUAL-TRADING NN
HONDURAN JJ
TRAVELS VBZ NNS
SENTIMENTAL JJ
HONDURAS NNP NNS
FRUSTRATED VBN JJ VBD
SULZER NNP
WATER-COOLED JJ
ROCKET-MOTOR NN
C-5B NN
DUDLEY NNP
CRUSTY JJ
BROADER-BASED JJ
KILTY NNP
CORINTHIAN JJ
AUTHORIZING VBG
W.VA NNP
TELEPHONING VBG
SMOCK NN
LIN-BELLSOUTH NNP
WEEKEND NN NNP
NUTTY JJ
DOWNSHOOT NN
MEMORIALIST NN
65.2 CD
BEIRUT NNP
600-POINT JJ
65.4 CD
65.6 CD
65.7 CD
65.9 CD
DISCOUNT-TOY JJ
LOOKING VBG
ANTHERS NNS
SURPRISING JJ VBG
BMWS NNS
942,000 CD
MORE-DETAILED JJR
COMPLAINED VBD VBN
KUWAITI JJ
GERSONY NNP
LOTHSON NNP
HEAVY-TRACKED JJ
SELTZER NNP
ANTI-TAX-SHELTER JJ
NEGAS NNP
VOWS VBZ
PUSSY-WILLOW NN
NON-SWEDISH JJ
LOWELL NNP
PAGES NNS NNP NNPS
STEVIE NNP
DISTILLING VBG
MALONEY NNP
CARPENTERS NNS
NIEMAN NNP
119.88 CD
HEALTH-CARE NN JJ
DUMPED VBD VBN
TURF NN JJ
UNPREDICTABLE JJ
CABERNET NNP
KILLEEN NNP
TURK NNP
PREAMBLE NN
25,000-MEMBER JJ
TURN VB NN VBP RB
GLANCE NN
SQUEAKY-CLEAN JJ
SPECIALTIES NNS
PATRIOTS NNPS
C-90 NN
WORKOUT NN
REVIEWED VBN VBD
MINORITY NN NNP NN|JJ
MOROZOV NNP
2,633,700 CD
CAPITAL-ASSETS NNS
ASSASSINATE VB
TYPEFACES NNS
TROCKENBEERENAUSLESEN NNP
WESLEYAN NNP
SOILS NNS
12,092 CD
FLAMBOYANT JJ
BRACKNELL NNP
CABLE-TV NN
PROSPECT NN NNP
OBSTRUCTING VBG
MATERIALLY RB
STRONGER JJR NNP RBR
PARACHUTING VBG
ROUNDS NNS
FORDHAM NNP
STREET-INSPIRED JJ
PROFESSION NN
55,500 CD
ADOPTS VBZ
GORKY NNP
GIVEBACKS NNS
GRIPPO NNP
2.9622 CD
DOORMEN NNS
FRACTURING NNP
CRUZADO NN
1989-1990 CD
OBSTRUCTION NN
GLENHAM NNP
NON-RUSSIAN JJ
6,475,000 CD
BUSINESS-LIKE JJ
PATENTS NNS NNP
CHANGE-RINGING NN
SWEETENED VBN VBD JJ
ENTITIES NNS
DISCERNING JJ
ROOFS NNS
LYNDEN NNP
786,860,000 CD
BLATANTLY RB
TRANSGENIC NNP
THREE-HOUR-SHOW NN
SWEETENER NN
ATTEMPTS NNS VBZ
SPECIALS NNS
GALOOB NNP
MANUFACTURING NN VBG NNP
GRANDPARENT NNP
UNATTRACTIVE JJ
CORRECTED VBN JJ VBD
FOXES NNS
MUSICIANS NNS
10.625 CD
PERILS NNS
INHUMAN JJ
UNDERTAKEN VBN
WELTER NN
ARSENEAULT NNP
IMMATURITY NN
TRIBUNE-DEMOCRAT NNP
MARKET-MONITORING JJ
REALLOCATE VB
1,425,035 CD
PURSUING VBG NN
ARNEY NNP
BIOGRAPHER NN
SHEEP-LIKE JJ
INCORRECT JJ
AFFAIR NN NNP
PYSZKIEWICZ NNP
ONCOGENE NN
EVANSTON NNP
TYPEWRITERS NNS
3\/4 CD
INTRACOMPANY JJ
3\/8 CD
SPREADSHEET NN
PREDATES VBZ
801.2 CD
SCHULZ NNP
PRETENSIONS NNS
LOWERS VBZ
801.6 CD
SMOKE NN VB VBP
WINNOWING NN
UPBEAT JJ NN
DONALDSON NNP
DOLLAR-PRICED JJ
SLAMMED VBD
OFFI NNS
PRE-CRASH JJ
PREBON NNP
FESTOONED VBN
7\/16 CD
48-YEAR JJ
EL-ABED NNP
MAXUS NNP
SLAMMER NN
STEINHART NNP
32-A-SHARE JJ
EXPANSION-MINDED JJ
YOM NNP
YON RB
1988-89 CD
OUTLANDISH JJ
YOU PRP
LOWEST JJS
PERIODICALLY RB
FIRST-RATE JJ
PERIOD NN NNP
IGNITED VBD VBN
SUPERVISE VB VBP
BIASED VBN
AUTHORITY NN NNP
HADHAZY NNP
WEAVER NNP
WEAVES VBZ
MOST-ACTIVE JJ
BRIDGE NNP NN JJ VB
DUFFUS NNP
MIAMI NNP
GENESIS NN
SOUTHLAKE NNP
FLASHBACKS NNS
ALGERIA NNP
WISH-LISTS NNS
BIASES NNS
DIVERTED VBN
175,240,000 CD
9.125 CD
ALTERNATE JJ
POPULATING VBG
DOLLAR-COST NN
SUFFICE VB
ALUMNI NNS
7\/32 CD
MELLOAN NNP
COLLABORATE VBP VB
KLUC-FM NNP
AMENABLE JJ
SIMILARLY RB
CAPITAL-GAINS-CUT JJ
DELUGE NN
DELAYED VBN VBD JJ
AUTO-STROP JJ
ROSTER NN
NEW-ISSUE JJ
BIGGEST-SELLING JJ
STRONGLY RB
CAVED VBD
PRISONERS NNS
SHOOTING VBG NN
POPULATION NN NNP
STREISAND NNP
ANTIQUATED JJ
BUMBLING VBG
CAVES NNS
GOVERNMENT-GUARANTEED JJ
GRAMM-RUDMAN-HOLLINGS NNP
POULENC NNP
FLY-BY-NIGHT JJ
DIAMOND NNP NN
641.5 CD
CANADIAN-U.S. JJ
LOCOMOTIVE NN
IACOCCA NNP
HAMMACHER NNP
HEADCOUNT-CONTROL NN
DOMINICI NNP
DOMINICK NNP
ROOMS NNS
1.2645 CD
SOUTHLAND NNP
LAUNDERERS NNS
PLANTAGO NN
DRESDNER NNP
LIGHT JJ NN NNP VB
AIRING VBG NN
CUSTOMARILY RB
SLATED VBN VBD
HALFHEARTEDLY RB
CO-OP NN
11-MONTH-OLD JJ
HIGH-CLASS JJ
OWING VBG
NASAA NNP
INDEED RB UH
MOSSOVIET NNP
UNPRECEDENTEDLY RB
EIFFEL NNP
SLATER NNP
COMMISSIONERS NNS
DRAGGED VBN VBD
PURSUITS NNS
MUAMMAR NNP
GATEWAY NN
BLOUNT NNP
CORRECTLY RB
DEPRESSANT NN
DRAGGER NN
GLYCOLS NNS
MALLEABLE JJ
FRANKLIN-TROUT NNP
S.P.A NNP
FLIGHT-ATTENDANTS NNS
MOTHERS NNS NNP
UNIRAMOUS JJ
KIMBA NNP
INVITATION NN
PRODUCT-INSPECTION JJ
BROWNSTEIN NNP
ANGEL\/EMI NNP
DISCHARGED VBN
PERITO NNP
TELECOMMUNICATIONS NNS NN NNP NNPS NNS|NN JJ
DISINTERESTED JJ
SCWHAB NNP
YUK NN
BIFURCATED JJ
ANGLIAN JJ
AUTHORIZE VB
BENEFITING VBG
SUCCEED VB VBP
UNDEREMPLOYED JJ
DISCHARGES NNS
EGOTIST NN
NON-NEW JJ
ATTACKERS NNS
QUENTIN NNP
496,116 CD
NEWCASTS NNS
CRUTCH NN
SKULL NN
KRAT NNP
HALF-CENTURY NN
LYNDON NNP
KILLERS NNS NNPS
WIDEN VB VBP
MCNAIR NNP
WIDER JJR RBR
DISTRACTING VBG JJ
HOLZFASTER NNP
POINDEXTER NNP
PUZZLING JJ
WHEREWITHAL JJ
MCFARLAN NNP
VANILLA NN
NASDA NNP
NOVO\/NORDISK NNP
COMMONALITY NN
FIRMING VBG
ETHNICALLY RB
DWELLER NN
FIVEFOLD JJ RB
CHESSMAN NNP
JOANN NNP
35452.72 CD
COMPLAINTS NNS
98.481 CD
EASTERNERS NNS
UNPROVEN JJ
GRUELING JJ VBG
NOMINATED VBN VBD
WAIVED VBN VBD
QUASHING VBG
BYRNE NNP
NOUVEAU JJ
9.192 CD
DISTRACTION NN
INWARD-LOOKING JJ
NON-ENCAPSULATING JJ
FOUR-YEAR-OLD JJ
1191.86 CD
CASINGS NNS
FURMAN NNP
ONE-WORD JJ
PLEWS NNP
WAIVER NN
VERIFIED VBN
WAIVES VBZ
UNWRITTEN JJ
PUREPAC NNP
ASSERTING VBG
SPONSORING VBG
116,000 CD
GUNG-HO JJ
PSYCHOLOGICALLY RB
SOLACE NN
GRANDMOTHER NN
STUMBLE VB VBP NN
EDITIONS NNS
NAUMAN NNP
PREDATOR NN
TODAY NN NNP RB
IMPROVE VB VBP
ODDEST JJS
DUMPTY NNP
627.7 CD
PROPELLED VBD VBN
LEAKERS NNS
FLEETWOOD NNP
BYRON NNP
BLOUSE NN
TEMPER NNP
JETTISONING VBG
SYNERGY NN
STYLE NN
51-CASH JJ
HANDMADE JJ
4,090,000 CD
SHOPPING-CENTER NN
RUBEGA NNP
SWEEPS NNS VBZ
ROOST VB
ASSERTION NN
PREMIERE NN VB JJ NNP
NEGRO NNP
BEHAVIORAL JJ
EMPIRE-BEROL NNP
8.734 CD
SCOTIA-MCLEOD NNP
ANSWERABLE JJ
OKOBANK NNP
9,756 CD
ANCHORAGE NNP
SALUTE NN
CRUMBLED VBD VBN
STROBE NN
HEATHERINGTON NNP
CIRCUIT NN NNP
MULTINATIONALS NNS
ROOTS NNS
ANTIDOTE NN
29.583 CD
PERFORM VB VBP
HOUSTON-BASED JJ
TRYON NNP
CRUMBLES VBZ
DISHES NNS
UNRAVELED VBN JJ VBD
DEREGULATED VBN
AFRICANS NNPS
LOMBARDI NNP
APTLY RB
URGING VBG NNP
RATIFYING VBG
IRREGULAR JJ
LOMBARDO NNP
DALLARA NNP
WIND-SWEPT JJ
BALCOR NNP
VOTING NN VBG NNP JJ
PRECEDE VB
HICKMAN NNP
46,995 CD
DONALDSONVILLE NNP
CONVENANTS NNS
LYSTER NNP
REASSERT VB
PUDDING NN
HILTON NNP
STRODE VBD
FAVORABLE JJ
CATARACTS NNS
MAYAN JJ
BABELISTS NNS
LESER NNP
ESTABLSHED VBN
NEGUS NNP
LANGUAGE NN
CORRIDOR NN
FAVORABLY RB
REASSESS VB NN
TRAUMATIZED VBD VBN
ELIAS NNP
MAYBE RB
STRIKINGLY RB
AFFIRMATION NN
321-99 CD
213.2 CD
ANTI-MONOPOLY JJ
SWEETS NNS
ELEVEN CD
MORTGAGE-BASED JJ
89.875 CD
TALLER JJR
SURGICAL-ABORTION JJ
NON-NMS JJ
ARDMORE NNP
FULL-BODY JJ
BORDERS NNS
MISSPENT VBN
PASSENGER-KILOMETERS NNS
BESSEMER NNP
HANDMAID NNP
ANTELOPE NN NNS
SOLAIA NNP
HOMER NN VB NNP
LEMMINGS NNS
HOMES NNS NNP NNPS
KRIZ NNP
MEMOS NNS
RUBELI NNP
387.4 CD
GEORGESCU NNP
AFFILIATE NN
DEEDS NNS
ABABA NNP
387.8 CD
NASSAU NNP
SCALED VBN VBD
BYRUM NNP
COMPUTERIZING VBG
AVOIDING VBG
SALERNO NNP
133.1 CD
AGREEABLE JJ
133.4 CD
GEORGIA-PACIFIC NNP
SCALES NNS
133.7 CD
133.8 CD
DOMINION NNP NN
HOUSING NN NNP
FORESTRY NN
ADVISERS NNS NNPS NNP
TAX-REFORM JJ
STEPCHILDREN NN
81,000 CD
SHOWBIZ NNP
TEMPLE NNP NN
DIAMANDIS NNP
HOME-RUN JJ NN
MINIATURE JJ NN
MOSHER NNP
AUTOCRATIC JJ
FRAGMENTATION NN
CASINOS NNS
NAUMBERG NNP
ABACK RB
ASSERTIVE JJ
TAKANORI NNP
CRUDEST JJS
OUTLYING JJ
MAYER NNP
LIFE-THREATENING JJ
EXTENDING VBG
RECONCILES VBZ
POLYPROPLENE NN
KLIMPL NNP
FREQUENT-FLIER JJ
ARMORED JJ NNP
WIDOW NN
30-DAY JJ CD
EXCELSIOR NNP
RUBENS NNP
BRIGHTENING VBG
GUARD NNP NN VB VBP
EXPENDABLE JJ
221-PERSON JJ
25-POINT JJ
VALENCIA NNP
REGROUP VB VBP
ORDAINED VBN
HENNING NNP
ATHLETE-S NN
CITYFED NNP
CLAIMED VBD VBN
LIMITS NNS VBZ
BACK-DATING VBG
CULTIVATED VBN
ESSAYIST NN
STOCK-PICKING JJ NN
BUCKHEAD NNP
547,347,585 CD
BULLHORNS NNS
LESKO NNP
72-FRANC JJ
THEN-PENDING JJ
AMERMAN NNP
CULTIVATES VBZ
DELUXE JJ
80.3 CD
ACHIEVEMENT NN NNP
ARCHIVAL JJ
80.6 CD
BRIAN NNP
NASSER NNP
80.8 CD
WALTHAM NNP
MAINFRAME NN JJ
MANDELA NNP
SHANDONG NNP
STROKE NN
TAPESTRY NN
VOTIVE JJ
MILAN-BASED JJ
I.C.H. NNP
ZBB NNP
ACRIMONY NN
CONVENIENCE-FOOD NN
AUDITOR-GENERAL NN
BRIBE NN VB
TREMENDOUS JJ
RATHER RB NNP
FAST-APPROACHING JJ
SOMEWHAT RB
OUTBURST NN
BOUILLAIRE NNP
BALLOONISTS NNS
EXTRADITION NN
CATASTROPHIC-ILLNESS NN JJ
EMULATE VB
AFFIRMATIVE JJ
OVERFLOWING VBG
KEYED JJ VBN
TRUCKERS NNS
OCTAVES NNS
SUCCESS NN NNP
KRON NNP
DISCARD VB
RETROVIR NNP
TRUTHFUL JJ
STROLL VB VBP
KEYES NNP
DRACHMAS NN
56,000 CD
RUBERG NNP
BEDDALL NNP
BRICK NN NNP
DOCTOR NN VB NNP
PARKING NN VBG
TURBOPROP NN
RAISING VBG NN NNP
EXCLUSIONS NNS
BRECHTIAN JJ
INDOSUEZ NNP
PHILADELPHIA-BASED JJ
1,531,000 CD
WEEKED NN
MCARTOR NNP
DOUBLE-DIGIT JJ
DEREGULATON NN
119.2 CD
DEDERICK NNP
JOURNAL NNP NN
CLOSED-DOOR JJ
SILVER-CONSPIRACY NN
HOUSEHOLDS NNS
SECONDLY RB
CLAIMING VBG
WEEKES NNP
SLUGGISH JJ
BRIDE NN
STEWED VBD JJ
SLAM-DUNK VB NN
STARVING VBG
MARKET-BASED JJ
HOMMA NNP
DAIHATSU NNP
STREAMED VBD
CHASTISED VBD VBN
SOVIET-CONTROLLED JJ
STRONG JJ RB
ESSAR NNP
SEARCHED VBD
PICTURED VBN
ASBESTOS-ABATEMENT NN
BEHAVIORS NNS
BIEHL NNP
ESSAY NN
CHASTISES VBZ
11.125 CD
36-MINUTE JJ
BRIEF JJ NN VB NNP
PETROGRAD NNP
LATELY RB
ZEL NNP
ENCLOSED VBN
SEARCHES NNS VBZ
SOHMER NNP
QUERIED VBN
PICTURES NNS NNP NNPS VBZ
EXEMPT JJ VB
PROCLAIMING VBG
ARCHIVES NNPS
FRAUMENI NNP
WALTHER NNP
ART-NOUVEAU JJ
ZEY PRP
BROTHERLY JJ
FINGERPRINTS NNS
QUERIES NNS VBZ
TELESYSTEMS NNS NNP
PRO-NORIEGA JJ
1-DEC NNP
FASTER-SPENDING JJ
SNAPPED VBD VBN JJ
DISAPPEARS VBZ
460.05 CD
DEEMS VBZ
NASTY JJ
CUDDEFORD NNP
IDEOLOGUES NNS
ADMINISTER VB
BOMBINGS NNS
VARNELL NNP
DISARMAMENT NN
LIMITATION NN
SOLARZ NNP
TEMPTS VBZ
PENNZOIL\/TEXACO NNP
REPACKAGE VB
HIGH-RISE-PROJECT JJ
TURN-ONS NNS
COMPRISED VBN
TRAINED VBN JJ
LATENT NN
YACHTSMAN NNP
BRUSHBACKS NNS
PRODUCT-LAUNCH NN
ZEAL NNP
CORPSE NN
THUNDERSTORM NN
66.5 CD
SPEECHES NNS
66.6 CD
INGRAINED JJ
66.7 CD
SACRED JJ
66.8 CD
POPPENBERG NNP
66.9 CD
TRAINER NN
720,000 CD
COMPRISES VBZ
INNINGS NN NNS
PRESSED VBN VBD
PRICE-REPORTING NN
DORGAN NNP
LURCHING VBG
CHURCH NN NNP
RECALCULATING VBG
LARKIN NNP
HISTORIANS NNS
PRESSES NNS
PATTERNED VBN
HARVARD NNP
JOURNEY NN NNP
ROUNDING-OFF NN
HERZOG NNP
UNDEFINED JJ
IBC\/DONOGHUE NNP NN
LEAGUE NNP NN
WAREHOUSE NN NNP
ATTACH VB VBP
BROTHER NN
BUZZSAW NN
LANDHOLDINGS NNS
ZHU NNP
OVERRULED VBD VBN
ATTACK NN VB NNP VBP
KRUG NNP
ORIGINALLY RB
TOMSHO NNP
EXTREME JJ NN
TETTAMANTI NNP
EXXON-OWNED JJ
THORNTON NNP
CASSETTE NN
OBSOLETED VBN
SQUINTING VBG
EAKLE NNP
MILPITAS NNP
POETRY NN NNP
FORFEITABLE JJ
KADANE NNP
ZIA NNP
11,700 CD
DISAPPROVAL NN
SCALPS NNS
ESSEX NNP
MAYOR NN NNP
GEORGESON NNP
BOTTLE NN VB
460.33 CD
SUNUNU NNP
VEVEY NNP
EMBARGOS NNS
RESIDENCE NN
LOW-LIFES NNS
ZIP NN VB VBP
CIRCUMVENTS VBZ
TELLINGLY RB
CALMNESS NN
SPUR-OF-THE-MOMENT JJ
DISPATCHERS NNS
CORPUS NN
ELIOT NNP
BRIGADES NNS
RECOLLECTION NN
HDTV-SCREEN JJ
VALIDITY NN
WHEREVER WRB
OBSERVANCE NN
AIKEN NNP
TABLESPOONS NNS
CULTIVATING VBG
SHILLINGS NNS
452.23 CD
CODDLED VBN
GEBRUEDER NNP
550,000 CD
FRENZEL NNP
ROAMED VBD
287-123 JJ
ADDRESSING VBG
DEERE NNP
ASSUMING VBG
ROPER NNP
ROPES NNS
PUNISHMENT NN
PETITION NN VB
WEEKLY JJ NNP RB RB|JJ NN
DATA-TRANSMISSION NN
CULTIVATION NN
444.19 CD
8086 CD
8088 CD
914-251-6200 CD
PREPAYMENT-PROTECTED JJ
RANKINGS NNS
683,000 CD
RECESSIONS NNS
DORGEN NNP
TOP-10 JJ
DESPAIRING JJ
INSUPPORTABLE JJ
CASCADED VBD
DECREE NN
436.01 CD
PEPPER NNP NN
LATEST JJS JJ
STROUP NNP
THROAT NN
MENUHIN NNP
BOTTOM NN JJ VB
ESSAYS NNS
MISCONDUCT NN
CLUBS NNS NNP NNPS
DIAL NN VB
DIAN NNP
PROTEIN-1 NN
NON-LAWYERS NNS
DISAPPROVED VBN VBD
ORIGINATE VB
STROVE VBD
ORGANIC JJ NNP
OVERBOARD RB
COMMERCIAL-CREDIT NN
FOYER NN
MONETARIST NN JJ
65TH JJ NNP
DIAZ NNP
DIABETICS NNS
KRYS NNP
RETRACED VBD
75-LAWYER JJ
ANTITRUST JJ NNP
BELGIQUE NNP
ELISA NNP
APPOINTMENT NN
HEDGES NNP NNS
DISAPPROVES VBZ
EMOTIONALISM NN
CHAPIN NNP
REGRETTED VBD VBN
HIGH-PERFORMING JJ
MANNERED JJ
EDWARDS NNP
O'ROURKE NNP
NEGOTIATORS NNS
BRINE NN
INVARIABLY RB
INFRINGE VB
BRING VB VBP
ELITE NN JJ NNP NNS
DICE NNS
ROWING NN
BRINK NN NNP
NEVERTHELESS RB
SYNTHESIZERS NNS
DICK NNP
COMMON-CARRIER NN
ATTAIN VB
SUBSUMED VBN
UNIFYING JJ VBG
SURFACE NN VB VBP
CHANGED VBN VBD JJ
DJURDJEVIC NNP
11,762 CD
INTEREST-RATE-SENSITIVE JJ
CHROMOSOMES NNS
CLARKSBURG NNP
OSTPOLITIK NNP
ERICSON NNP
EXPELLED VBN VBD
54.625 CD
CREVICES NNS
DELVED VBN
452.75 CD
LETTUCE NN
452.76 CD
PLAGUING VBG
GRUMMAN NNP
ZOO NN
525,000 CD
460.98 CD
CHANGES NNS VBZ
BRIEFS NNS NNPS
COMAIR NNP
QUALIFICATIONS NNS
CLUES NNS
MULTITUDE NN
ABATE VB
SMARTER RBR
MINISUPERCOMPUTERS NNS
GENETIC JJ NNP
VIVALDI-AT-BRUNCH JJ
VENTURING VBG
DELVER NN
SNUBBED VBD
DELVES VBZ
PALATABLE JJ
SHOCKS NNS
INHIBITED VBD
CLUFF NNP
BARCLAYS NNP
COMPATABILITY NN
RETOOLING VBG
DIED VBD VBN
JACKALS NNS
VIKINGS NNPS
TIME-POOR JJ
98.518 CD
KINDRED JJ
ORIANI NNP
CONGRATULATING NN
JUST-CONCLUDED JJ
DIES VBZ
OUTPERFORMS VBZ
DIET NN NNP
CONFICT NN
FACTORY-MODERNIZATION NN
AGGRESSIVENESS NN
MALSON NNP
TELEMARKETING NN
UNECONOMIC JJ
SHOWCASES NNS
INVOKED VBD VBN
194.24 CD
222,000 CD
DABNEY NNP
UNDERSCORING VBG
OLLIE NNP
AKERS NNP
BERATED VBD
98.523 CD
REWRITING VBG
OHIO-BASED JJ
ATORINO NNP
INVOKES VBZ
SUSPENDING VBG
EPPELMANN NNP
DRAINS VBZ
POSITIONAL JJ
OVEREMPHASIZE VB
HYBRID JJ NN
NOT-QUITE-MAINSTREAM JJ
COUNTERBIDDER NN
RELATIONAL NNP
MANEUVERED VBD VBN
BAROQUE JJ
MONITORED VBD VBN JJ
11,795 CD
WIDURI NNP
NUISANCE JJ NN
ZELL NNP
ALLUDED VBD
642.2 CD
REPAYING VBG
PEAKING VBG
10-YEAR JJ CD
C.B. NNP
LENINSKOYE NNP
TELACTION NNP
BOAT NN NNP
DIGS NNS VBZ
INDECENT JJ
ZSA NNP
1.2745 CD
CORTESE NNP
SNIDELY RB
BUTTER-NUT NNP
BRISK JJ
INSTITUTIONS NNS NNP NNPS
ORLEANS-BASED JJ
DUBIOUSLY RB
PLAUSIBLE JJ
COUPLING NN
BOARD'S NNP
BEGINING NN
100-MILE JJ
ISLANDERS NNPS
OCHOA NNP
HAMSTRING VB
FERREIRA NNP
DEPRECIABLE JJ
194.50 CD
NON-HUMANA JJ
AMPEREX NNP
MENEM NNP
PLAUSIBLY RB
BOCA NNP
EVEREADY NNP
GUBER NNP
KOKUSAI NNP
CARTOONISTS NNP NNS
MUTANT JJ NNP
STUDENT-ATHLETE NN
HACCHE NNP
9,800 CD
LITERACY NN
ENTERTAINMENT NNP NN
BOCK NNP
RUNAWAY JJ
NEUROSURGEON NN
TOUSSIE NNP
VIRTUALLY RB JJ
CRYING VBG
LANGFORD NNP
AROMA NN
CAPITAL-BOOSTING JJ
INFILTRATE VB
MAMMOTH JJ
CURATORS NNS
INSISTENCE NN
PERFUMED JJ
ARTILLERY NN
1,200-YEAR-OLD JJ
140.106 CD
62.875 CD
BODE VB NNP
194.69 CD
POSITIONED VBN VBD
SOMETIMES-EXHAUSTING JJ
C.E. NNP
9.275 CD
COVELL NNP
DISCIPLINED VBN JJ VBD
EMPHASIZED VBD VBN
NIGHTS NNS NNPS
BODY NN NNP
CIBA-GEIGY NNP
SAVINGS-AND-LOAN JJ NN
4.2-TON JJ
ACADIA NNP
18-STORY JJ
GREENHOUSE-PRODUCED JJ
ZVI NNP
EMPHASIZES VBZ
482.3 CD
GUILHERME NNP
MERITOR NNP
RESTART VB
BANCORP NNP
RECEDE VBP
CIMFLEX NNP
SMARTLY RB
HONEYBEE NNP
BUILDING-PRODUCTS NNS
NONPRODUCTIVE JJ
ZACHARIAS NNP
SEGREGATE VB
31.05 CD
KINDS NNS
MOCKERY NN
PSYCHOLOGISTS NNS
427,300 CD
UNHEROIC JJ
KINDNESS NN
CLUMP NN
TWO-INCOME NN JJ
WISHED VBD VBN
DILL NNP
CELTONA NNP
FOURTEEN CD
INTERLEUKIN-2 NN
DISPARAGING VBG
RAMPARTS NNS
INTERLEUKIN-3 NN
DIGNIFY VB
INTERLEUKIN-4 NN
PROGRESSIVES NNS
WISHES VBZ NNS
HUMPHRIES NNP
1.2795 CD
RESTATE VB
MASSEUSES NNS
BOGA NNP
GLUTTED JJ VBN
IMPRISONED VBN
31.18 CD
TOLENTINO NNP
ABANDONED VBN VBD JJ
DROUGHT NN
DIME NNP NN
ZERO CD NN VB VBP
8.820 CD
GIGOLO NN
REBOUNDS VBZ NNS
JUNCTURES NNS
PIERLUIGI NNP
SHACK NNP
CHANNELS NNS
CONTRASTING VBG
USEFULNESS NN
THRONE NN
CATEGORIZED VBN
CONCEPTION NN
23.00 CD
DUMPSTER NNP
178.61 CD
31.22 CD
POPULATION-CONTROL JJ
31.25 CD
ENERGIE NNP
RELICS NNS
WASHINGTON NNP
CAESAREAN JJ
SHADE NN
COPYCATS NNS
KENNEDY-WAXMAN NNP
PERSISTING VBG
MUTILATED VBN
BERNSTEIN NNP
BELONGS VBZ
SALESPARSON NN
ORIGINALITY NN
MUCH-REVISED JJ
CLEANED VBN VBD
MUTINIES NNS
TELEVANGELISM NN
MUTATE VB
REUNIFICATION NN NNP
EMINENT JJ
WEIGHT-TRAINING NN
SCARE-TACTIC NN
ELMHURST NNP
ZETA NNP
23.11 CD
FRANCOIS NNP
3,524,000 CD
WEAKNESSES NNS
DUSTY JJ NNP
SHADY JJ NNP
KEYNESIANS NNPS
CLEANER JJR NN
37.875 CD
KINGS NNS NNPS
EXPEDITED VBN JJ
BLOOMFIELD NNP
CAREFREE JJ
354,600 CD
CARMINE NNP
ENDED VBD VBN
290,541 CD
30-MINUTE JJ
GUSTAVUS NNP
BOIL VB NN
548.9 CD
C.J. NNP
ARTWORK NN
CAPRICIOUSNESS NN
DENATIONALIZED VBN
HALFWAY RB
HEIGHTEN VB
LANDLORD NN
TRINEN NNP
RESIDENTS NNS
REVISIONISTS NNS
RECORDS NNS NNPS NNP VBZ
RELIED VBN VBD VB
ONSLAUGHT NN
23.20 CD
15.02 CD
RELIEF NN NNP
STATE-PLAN JJ
15.06 CD
23.25 CD
AROSE VBD
MENLO NNP
15.09 CD
ALLWASTE NNP
31.48 CD
SUPPER NN
AUCOIN NNP
RENOWNED JJ VBN
SHATTERED VBD VBN JJ
RELIES VBZ
BANK-CREDIT NN
PALATIAL JJ
C.K. NNP
FOUR-FAMILY JJ
100-MEGABYTE JJ
GILLELAND NNP
HALLETT NNP
DIPS NNS
COVERS VBZ NNS
WIDOWED JJ VBN
COVERT JJ NNP
LITTER VBP NN
23.31 CD
31.50 CD
MELLOWED VBN
INAUGURATED VBN
TRAILING VBG
23.34 CD
31.55 CD
RIDING VBG NN
UNEASINESS NN
CLOTHESTIME NNP
THRILLS VBZ
UNDERSTATED VBN VBD
JET-ENGINE NN
INSTANTLY RB
AWAITS VBZ
GREATER JJR NNP
HONDA NNP NN
SAGGED VBD VBN
PLUMMETED VBD VBN
INCURRING VBG
MARBLE NN
WIELD VB
KINJI NNP
SHAGS VBZ
PEARSON NNP
214.4 CD
RESENTED VBD
TARRYTOWN NNP
15.25 CD
15.27 CD
31.65 CD
BOLD JJ
OVERDONE VBN
LYPHOMED NNP
DIRE JJ FW
CREATIONIST JJ
ABANDONMENT NN
RESTRUCTURE VB NN VBP
CURRENTLY RB NNP
8.875 CD
BETWEEN IN RB
DIRK NNP
RESCUED VBD
HONED VBN JJ
BOLT NN
PLENTIFUL JJ
DIRT NN
COVETS VBZ
15.31 CD
23.50 CD
WOOLARD NNP
RESCUES VBZ
JUMPING VBG NNP
TANGLE NN VBP
23.53 CD
CHILD-SAFETY JJ
31.75 CD
RUTHLESSLY RB
23.57 CD
FLAGGING JJ
BOMB NN VB
3426.33 CD
DISC NN NNP
HONEY NN NNP
388.5 CD
ATLANTANS NNPS
DISH NN VB
SIX-CENT JJ
DISK NN
MAZDA NNP
HAWAIIAN\/JAPANESE JJ
WACHTELL NNP
YUSEN NNP
134.2 CD
SPLINTERED JJ
15.43 CD
CHANCELLOR NNP NN
LAWLESS NNP
15.44 CD
PARTNER NN NNP
134.8 CD
23.65 CD
STAFFERS NNS
134.9 CD
NON-INSURANCE NN
329,600 CD
BONA JJ
BOND NN NNP
BONE NN
HOBOKEN NNP
WOODBRIDGE NNP
DEFER VB
TELEPHONE-COMPANY NN
CONVEXITY NN
BOOK-TO-BILL NN
BONN NNP
BONO FW
CONFIRM VB VBP
BLACKS NNS NNPS
15.50 CD
23.72 CD
GEORGIA NNP
ORIENTAL JJ
MAZES NNS
CYANIDE-LACED JJ
SWISS-BASED JJ
CABLE-TELEVISION NN
ROMANTICIZED VBN
SHORT-RANGE JJ
BOOK NN NNP VB
FASTENERS NNS
SHAKE VB NN VBP NNP
BOOM NN VB
BOON NN NNP
ELJER NNP
CONDOMS NNS
HOLLINGSWORTH NNP
BOOT NN
BURDENSOME JJ
SAVVIEST JJS
HASIDIC JJ
CRIMSON JJ
CHECKING NN VBG
15.64 CD
15.65 CD
SHAKY JJ
HATFIELD NNP
RECENT JJ
SMEDES NNP
TWIN JJ NN
SEGER-ELVEKROG NNP
INTERTAN NNP
CONDONE VB
CLEANLY RB
DIVE NN VB VBP
ENVY-QUOTIENT NN
FANATICS NNS
TUMOR-SUPPRESSOR JJ
RUSTLINGS NNS
SHALE NNP
CHILLINGLY RB
BRIDGESTONE\/FIRESTONE NNP
PERSIAN NNP JJ
RIVETED VBD VBN
OIL-INDUSTRY NN
MANNED VBD
RODERICK NNP
SHALL MD
CLOCKED VBN
CONTENDERS NNS
SWARMS NNS
15.72 CD
QUEEN NN NNP
MONTPELIER NNP
15.75 CD
BOETTCHER NNP
PROMINENTLY RB
MANNER NN
THROWN VBN
ABBEY NNP
WRING VB
THROWS VBZ
81.2 CD
MALAYSIAN-BASED JJ
81.5 CD
AVDEL NNP
81.6 CD
SUPPLY NN VB NNP VBP
SHAME NN
LITTLE JJ RB NNP
81.8 CD
TWO-AND-A-HALF JJ
81.9 CD
C.R. NNP
COLD-ROLLED JJ
QUALIFIED VBN VBD JJ
KRISHER NNP
ARGUED VBD VBN
COOPERATING VBG
COUCHED VBN
PUSHOVER NN
15.80 CD
LEKBERG NNP
15.82 CD
SIX-DAY JJ
CIPORKIN NNP
15.85 CD
ABSORBED VBN VBD
FISHERIES NNS NNPS
DEGRADATION NN
QUALIFIES VBZ
15.87 CD
CHANGYI NNP
LONG-BANNED JJ
176,470 CD
AUTHENTIC JJ
WATER-BORNE JJ
ARGUES VBZ
BORE VBD NN
LITERARY JJ NNP
BORK NNP
SHANE NNP
BORN VBN NNP
C.S. NNP
REY-CONTROLLED JJ
ACTIVITIES NNS NNPS
ENDORSERS NNS
PAYROLLS NNS
SCHWAB NNP
GREATLY RB
1,745,000 CD
ORIENTED VBN JJ
MITTERRAND NNP
15.92 CD
DISPLAYED VBD VBN
HARMLESS JJ
POIGNANT JJ
INDEXED JJ VBN
SIBV-MS NNP
COOPERATION NN NNP
CALGARY NNP
15.97 CD
SCHREYER NNP
PORTRAITS NNS
MENUS NNS
EX-CHIEF JJ
U.S.-BACKED JJ
WIESS NNP
RATIFY VB
INDEXER NN
INDEXES NNS
TRAVELOGUES NNS
SWALLOWED VBN
FOLGERS NNP
FIRST-NINE-MONTH JJ
VERNACULAR NN
SVELTE JJ
FREEWAY NN NNP
HOPSCOTCHED VBD
BOSS NN NNP
CHEEKY JJ
EX-ACCOUNTANT NN
LOGICAL JJ
ENDOW VB
YEAR-TO-YEAR JJ
RIGHT-TO-LIFERS NNS
OPTIONS-TRADING JJ
DISAPPEARED VBD VBN
MEDIA-LINKED JJ
METHODISTS NNPS
MEASUREMENT NN NNP
REJOIN VB
SCENARIOS NNS
NON-EXECUTIVE JJ
PARASITES NNS
COORDINATED VBN
BOTH DT CC PDT CD
SHAPE NN VB VBP
MOVIE-LIKE JJ
ABBIE NNP
71%-OWNED JJ CD
DIGNITY NN
CINEMATOGRAPHER NN
LITTON NNP
COORDINATES VBZ
RAIKES NNP
GLOATED VBD
ARRESTS NNS
RECESS NN
INSIGHTS NNS NNPS
TAUNTING NN
CRAVING NN
MANNIX NNP
ALAMCO NNP
SIGURD NNP
FINANICIAL JJ
51%-HELD JJ
BOUT NN
PERKED VBD VBN
PURPORT VBP
CHIPPED VBN
LASTEST JJS
TEAMMATES NNS
165-MEMBER JJ
PRE-EMINENT JJ
11:08 CD
HOLLINGER NNP
DEEMED VBN VBD
12,252 CD
MADISON NNP
PURPOSE NN
BLOOD-CLOT NN
MOST-WATCHED JJ
SHARE NN VB VBP NNP
GROWTH-CONTROLLING JJ
CHORTLED VBD
C.W. NNP
SHARK NN
WRIST NN
COMFORT NN NNP
FIXTURES NNS
RECLINING VBG
CLEANSE VB
SPORES NNS
HARBORING VBG
SHARP JJ NNP
SCOREKEEPING NN
11:13 CD
LANGENDORF NNP
11:15 CD
CELIMENE NNP
CLOBBERED VBN VBD
HONOR VB NN VBP
COMPUSERVE NNP
QUEKS NNPS
IMPORT-EXPORT JJ
ILLUSTRATION NN
UNDERWOODS NNPS
WRITE VB VBP
WAREHOUSING NN
67.1 CD
BLUEST JJS
67.7 CD
DARBY NNP
SEMEGRAN NNP
AFFECTED VBN JJ VBD JJ|VBN
67.8 CD
67.9 CD
AMUSING JJ
BOWL NN NNP VBP
BLUESY JJ
SEVEN-BEDROOM JJ
COMBAT NN VB
AMCAST NNP
NORTHROP NNP NN VB
ARCHRIVAL JJ NN
TOXICITY NN
FEDDERS NNP
KY.-BASED JJ
CRITICIZING VBG
SABRINA NN NNP
GYRATIONS NNS
REMEMBERS VBZ
ROLLED VBN VBD JJ
STILTS NNS
QUELL VB
IRREVERENT JJ
SOMALIA NNP NN
RELISH NN VB
PSYLLIUM-FORTIFIED JJ
RECOMBINATION NN
APPREHENSION NN
12,275 CD
PILEUP NN
CONVICTIONS NNS
ROLLER NN NNP
PERTUSSIS NN
MONOLOGUE NN
CICERO NNP
ESTEE NNP
BLINDFOLDED JJ VBD
45%-OWNED JJ
DUTCH JJ NNP NNPS
SOMALIS NNPS
AT&T-SPONSORED JJ
WRECKING VBG
RELEASING VBG
CONFLICTED VBN
EXTENDS VBZ
LIBERALIZING VBG
SPARKING VBG
11:30 CD
BOXY JJ
DATAPOINT NNP
ESTES NNP
VIEWERSHIP NN
CLEANUP NN
UNDIPLOMATIC JJ
ADJUSTING VBG NN
12,281 CD
SHODDY JJ
39,300 CD
GENEROUSLY RB
UNTAMED JJ
BOYD NNP
MEANINGS NNS
ARRANGEMENT NN
36,015,194 CD
PROPANE NN NNP
REVERSING VBG
CLASS-CONSCIOUS JJ
BOYS NNS NNPS NNP
SUBSTANCE-ABUSING JJ
SARASOTA NNP
GUILDERS NNS
DARED VBD
UNDER-THE-TABLE JJ
COOPERATIVE JJ NN NNP
CHENILLE NN
HUNGER NN
KERENSKY NNP
AILES NNP
DILLMANN NNP
MICH. NNP
RUPTURING VBG
KRISHNA NNP
BRIDGEPORT NNP
DRAWBACKS NNS
VROOM NNP
ASHWOOD NNP
CYNIC JJ
SHAVE VB
SIDETRACK VB
CHEERS NNS NNP
CHEERY JJ
COMPROMISED VBN
FACT-FINDER NN
11:54 CD
GOODMAN NNP
RATING NN NNP VBG
SAMPLED VBN
ARSENAL NN
RELIVE VBP
ABBOT NNP
LONGER-RUN JJ
VAXSYN NNP
11:59 CD
SALWEN NNP
COMBED VBN
FULL-FLEDGED JJ
MAGAZINE NN NNP
MARICOPA NNP
NEIDL NNP
CHEESE NN NNP
COMPUTERLAND NNP
SOFTEN VB
LITIGANTS NNS
COMPROMISES NNS VBZ
SOFTER JJR
DRIVING VBG NN JJ NNP
SAMPLES NNS
ADMIRERS NNS
4,750,000 CD
BACKPACKERS NNS
COMMENCEMENT NN
UBIQUITY NN
HALF-STATES NNS
RESIDED VBN
CHEESY JJ
TAIWAN-BORN JJ
ROLLIE NNP
FRANKENBERRY NNP
2691.19 CD
UNSPENT JJ
RESIDES VBZ
LIFETIME NN
EXTORTED VBD
ROLLIN NNP
DECISIVELY RB
RATIOS NNS
PROFILED VBN
ASSURED VBN VBD JJ
19%-OWNED JJ
STRAINED VBN JJ
28\/32 CD
ANTIHERO NN
BUNDLE NN
TAX-WRITING JJ
NEWSIES NNS
ABRAHAMS NNP
FRANCISCO-OAKLAND NNP
BAMBOOZLED VBN
KAVANAGH NNP
PROFILES NNS
SAINT-SAENS NNP
ASSURES VBZ
UNHUSKED VBN
BLAZING VBG
SEMILITERATE JJ
SOKOL NNP
OPTICAL-STORAGE JJ
AUTOMOTIVE-LIGHTING JJ
WAITRESS NN
PETERS NNP
CELLS NNS
63.375 CD
STITCHED VBN
CONRADIES NNP NNPS
LOSSES NNS
PRINCIPLES NNS NNPS
LABOR-SHORTAGE NN
LONG-AWAITED JJ
STRENUOUSLY RB
TERRIFIED VBN
APARTMENTS NNS
NORTHRUP NNP
LAUNCHED VBN VBD
TIPPED VBD
GEORGETTE NNP
BEHIND-THE-SCENES JJ
TIPPEE NN
STITCHES NNS
REGIMEN NN
NEIGE FW
DISMISSAL NN
PERMANENT JJ
CLUTTERED JJ VBN
DARIN NNP
ANISKOVICH NNP
ACTIVATE VBP
TRIUMPHED VBD
BERET NN
LAUNCHES VBZ NNS
TIPPER NN
MEANINGLESS JJ
FDIC NNP
FUGITIVES NNS
NASTRO NNP
NURSERY NN
SALVADOR NNP
PIVOTAL JJ
FT-SE NNP
FRAUDULENTLY RB
UNCOVERING VBG
803.7 CD
SERPENT NN
INSENSITIVITY NN
2683.20 CD
WATCHDOGS NNS
COORDINATOR NN
MATTAUSCH NNP
APPREHENSIVE JJ
PSYCHOBIOLOGY NN
WATKINS-JOHNSON NNP
QUEST NN NNP
OPERATED VBN VBD VBD|VBN
HONESTLY RB
MONETTA NNP
GOBBLEDYGOOK NN
SEQUENCE NN
COMBIS NNPS
DIFFERENCES NNS
REFRIGERATORS NNS
BUCHANAN NNP
KIRKENDALL NNP
OPERATES VBZ
AGREE VBP VB
1.87-MARK JJ
EROTIC NNP
PRO-UNION JJ
SOMEWHERE RB NNP
BEST-RUN JJS
CLEANLINESS NN
EVENHANDED JJ
SPANDEX NN
COMBATING VBG
EXPLORATION NN NNP
MARCHERS NNS NNPS
FITTING JJ NN
ORIGINATIONS NNS
GOVERNMENT-PLUS JJ
436,000 CD
TRUDEAU NNP
HEATHEN JJ
KNOCK-OFF NN
GUNSHIP NN
PSYLLIUM NN
9.324 CD
DARLA NNP
KEARNS NNP
185-ACRE JJ
FINNAIR NNP
LUMBER NN VBP NNP
VIROQUA NNP
MARCHESE NNP
KEARNY NNP
PANELISTS NNS
HOLDINGS NNS NNP NNPS
KANDAHAR NNP
PAINS NNS
PAINT NN VB VBP
98.625 CD
COLORATURA NN
ALAMOS NNP
PREVIOUS JJ
569,000 CD
9.333 CD
NEATNESS NN
DISMISSED VBD VBN
897.2 CD
FIDDLE NN
EVERYDAY JJ
ARTHRITIC JJ
GUCCI NNP
PRESTON NNP
WOODRUFF NNP
OHIO NNP
PIONEERING JJ
CLIPBOARD NN
10.875 CD
DISMISSES VBZ
POLLSTER NN
BULGARIAN JJ NNP
38.375 CD
BROKERS NNS NNPS
FISCAL-FIRST-QUARTER JJ
ARTHRITIS NN NNP
ZIPSER NNP
643.3 CD
643.4 CD
SOFTLY RB
WHITTEN NNP
MEGAQUESTIONS NNS
ARSENIC NN
STRAITJACKET NN
PERSIST VB VBP
RICHEBOURG NNP
GIMMICKRY NN
LOWER-LEVEL JJ
PATRICK NNP
ARSENIO NNP
NEILL NNP
REPERCUSSIONS NNS
63,971 CD
OPERATIC JJ
DISCUSSIONS NNS
EXCELLENCE NN
TEENAGERS NNS
KORNFIELD NNP
DEFENSIVELY RB
GOTTA NNP
DELWIN NNP
MAZZA NNP
A.I.R. NNP
HUGGIES NNPS
WOLCOTT NNP
8934014 CD
UNLIKELY JJ RB
CATCHERS NNS
REGISTRATIONS NNS
NAVIGATION NNP NN
ANTI-DEPRESSANT NN
BPCA NNP
DJIA NNP
VERNON NNP
WAGONEER NNP NN
JOCKS NNS
WARSHAW NNP
THACHER NNP
BLOODIED VBN
563.8 CD
DONNYBROOK NN
UNRETOUCHED JJ
BUSTED VBD JJ VBN
2659.22 CD
DARPA NNP
FLEAS NNS
BEFORE-TAX JJ
SANCTITY NN
TEMPTED VBD VBN
FRANCESCO NNP
BUSTER NN NNP
OHLS NNP
MICRO NNP JJ
POLLUTING VBG
SURGICALLY RB
PAIRS NNS
BERKSHIRE NNP
RENDER VB
POSSIBLE JJ RB
OLSHAN NNP
9.375 CD
CALIFORNIAN NN
SPORTS NNS NNPS NNP VBZ
ENJOINED VBN VBD
HUNTINGTON NNP
TRINIDAD NNP
LIGHTER-THAN-AIR JJ
SPORTY JJ
LEVAMISOLE NN
ZINC-STRIP JJ
WHOLESOME JJ
TOUGHEST JJS
PROTECTS VBZ
MARCEL NNP
POSSIBLY RB
TWO-LETTER JJ
REVALUED VBN
DC10-30 NN
CONTEMPLATE VB VBP
FEREMBAL NNP
MEDSTONE NNP
SELF-DEFINITION NN
8.903 CD
UNDERSUBSCRIPTION NN
MORTGAGE-SECURITIES JJ
ADMINISTERS VBZ
CORRAL VB
INFAMY NN
SENORITA NNP
VALUATIONS NNS
POLLUTION NN NNP
LOGGING VBG
GUNSHOT NN
BENTSEN NNP
SIX-FOOTER NN
11TH-BIGGEST JJ
DEMORALIZED JJ
COINED VBN
EMERGE VB VBP
BLACKLISTING NN
HIGH-INTEREST JJ
HUNGRY JJ
UNOPENED JJ
INFANT NN JJ
SCHIEFFELIN NNP
SHARESBASE NNP
PRISON-SHOP NNP
CRATES NNS
CACOPHONY NN
SOLDIERS NNS
ANTHROPOLOGY NN NNP
PARENTING NN
SLAVIN NNP
INFELICITOUS JJ
SHEARMAN NNP
HOISTED VBN
INDEX-OPTIONS NNS
SPEAKING VBG NN NNP
CURRENCIES NNS
HAULED VBD
PREFERRING VBG
AT*/NNP&T NN
BEROL NNP
ANTI-ULCER JJ
CAPACITIES NNS
UNCONFIRMED JJ
MOMENTARY JJ
ROLLUP NN
ARGOSYSTEMS NNPS
REALIGN VB
EIGHT-MONTH JJ
PLAUDITS NNS
80386 CD
GROANS VBZ
KEEGAN NNP
MUSIC-ENTERTAINMENT NN
FLEET NN NNP JJ
MARCHE NNP
SINO-FOREIGN JJ
SEGMENTING VBG
LOW-PROFITMARGIN NN
DARTH NNP
TONG'IL NNP
SPOOKED VBN VBD
761.38 CD
ROBERTI NNP
CRAWFORD NNP
ENDANGERMENT NN
DISPARITY NN
ROBERTO NNP
DARTS NN
YET-TO-BE-FORMED JJ
REACTIONARY JJ
ROBERTS NNP
WHITTLE NNP NN
FLOPPIES NNS
NACIONAL NNP
REFORMULATION NN
MINERAL NN
ORGAN-TRANSPLANT JJ NN
BLADES NNS
OPERATOR NN
MARCIA NNP
ATROCITY NN
DISGORGE VB
COMMERZBANK NNP
SWASEY NNP
KIYOTAKA NNP
INDULGENCE NN
ASTHMA NN
EXPANDING-PROFIT JJ
MALNUTRITION NN
POLITICALLY RB
CREAK VB
4,393,237 CD
CREAM NN NNP
549.9 CD
WHITELOCK NNP
CONCEDING VBG
CLAMPING VBG
BERRA NNP
BRUSHED VBD VBN
FURNISHINGS NNS
2233.9 CD
PIRELLI NNP
BERRI NNP
PATIENT NN JJ
BLOWUP NN
BRUSHES NNS
DEAFENING VBG
INSULIN NN
UPDATE VB NN NNP
CARICATURE VB
BERRY NNP NN
EXTRADITED VBN
BUSTLE NN
RESIDUE NN
BLUE-COLLAR JJ
HISTORICAL JJ
COLONIALISTS NNS
OERLIKON-BUEHRLE NNP
UNDERSCORED VBD VBN
LIFE-STYLE NN JJ
AGE-SPECIFIC JJ
TROPICANA NNP
EYEING VBG
DAYBREAK NN NNP
GLEEFUL JJ
469.4 CD
469.6 CD
PANACEA NN
INFRASTRUCTURAL JJ
469.8 CD
FUTILE JJ
HUGGING VBG NN
UNDERSCORES VBZ
FAS-ANTIGEN NN
BRIDGERS NNP
HUGGINS NNP
CLONED VBN
VIEWING NN VBG
215.3 CD
MAHATMA NNP
GOOD-TIL-CANCELED JJ
1230.80 CD
HOODS NNS
1206.26 CD
YARDS NNS
ANNOYING JJ
CLONES NNS
SLOP-BUCKET NN
CHELICERATES NNS
FIRST-PERSON NN
CREDO NN
9,999 CD
CLANNISH JJ
729.04 CD
132,620,000 CD
AGE-DISCRIMINATION JJ
PRECLUDED VBN JJ
WITHHELD VBN VBD
AMADO NNP
CREED NN
PRESIDENTIAL JJ
REDFISH NN
SKILLFUL JJ
PROVISIONING VBG
PRECLUDES VBZ
389.6 CD
STOP-MOTION NN JJ
CREEK NNP
WALL-PANELING JJ
DETAILING VBG
PASTIME NN
NEEDLESS JJ
SZABAD NNP
TEST-PRACTICE JJ
135.2 CD
ADVANCEMENTS NNS
COMPUTER-ROOM JJ
FOREFATHERS NNS
135.3 CD
135.6 CD
135.9 CD
EXCUTIVES NNS
EXTERNAL-TRADE JJ
FRUSTRATE VB
ATTACKED VBN VBD
AUSCHWITZ NNP
PATRIOT NN
OVERPAYING VBG
CARBON-DIOXIDE NN
INFORMING VBG
CODE-RELATED JJ
AMERICAN-BUILT JJ
ATTACKER NN
TEXTILES NNS NNP
AFRICAN JJ NNP
OVER-CAPACITY NN
LINGUINE NN
KNOCK-OUT JJ
HANDELSMAN NNP
CRONKITE NNP
SOLAR JJ NNP
COMPRISE VBP VB
KENMARE NNP
MARCOR NNP
MARCOS NNP
SKILLED JJ
EARNIGS NNS
TOKUYAMA NNP
INVOKE VB
LIMITATIONS NNS NNPS
FOUR-MILE JJ
PATTERNS NNS
RABBIT NN
PENTAMETER NN
77-YEAR-OLD JJ
SOUGHT VBN VBD
MONITORS VBZ NNS NNP
CHANNEL-ZAPPING JJ
INSISTENT JJ
DC-8-62 NN
POWER-TRANSMISSION JJ
DOOR-TO-DOOR JJ
DIFFERENCE NN
SANDIFER NNP
ABSORBS VBZ
WEGENER NNP
NOTIFIED VBN VBD
ORMSTEDT NNP
MELT-TEXTURED JJ
FRACTIONING VBG
TORRINGTON NNP
ENSUING VBG
SPURRING VBG
BARNABAS NNP
FOCUS-GROUP JJ
INVADERS NNS
BEST-OF-SEVEN JJ
NOTIFIES VBZ
INVOLVE VB VBP
DIAGNOSTIC JJ NNP
OPPONENTS NNS
GRADERS NNS
82.1 CD
82.2 CD
AMAHS NNS
CIALS NNS
82.5 CD
MAGICAL JJ
82.6 CD
82.7 CD
SCANIA NNP
82.8 CD
BOON-SANWA NNP
BEFALLEN VBN
DISCOUNTS NNS VBZ
AMSCHEL NNP
TEXASNESS NN
ENEMY NN
SOVEREIGNTY NN
FLATNESS NN
PROSPEROUS JJ
ZEALOUS JJ
DE-FACTO JJ
WELL-BEING NN
48,000 CD
TURBAN NN
LINDENS NNPS
VULNERABLE JJ
MONTGOMERY NNP
OBSERVED VBD VBN JJ
INDISPENSABILITY NN
PANTYHOSE NN
EDDINGTON NNP
LEUMI NNP
FLOORING NN
THEATRICAL JJ NN
PROGRAM-BASHING JJ
ELOQUENCE NN
GHOSTBUSTING NN
SALVAGE VB NN
CASTRO-MEDELLIN NNP
HOOKS VBZ NNP
OUEDRAOGO NNP
SOLER NNP
RESTED VBD
SHORTTERM JJ
OBSERVER NN NNP
ALLOWED VBN VBD VB JJ
EMPTIED VBN
OBSERVES VBZ
SPARKPLUGS NNS
THURGOOD NNP
REALISM NN
SELFISH JJ
PAVILLION NNP
ELKIN NNP
REALIST NNP
SANRAKU NNP
SHOKUBAI NNP
VILLA NNP
TRASH-BAG NN
OUTLINING VBG
LEECHES NNS
NEGOTIABLE JJ
RTC-APPOINTED JJ
UNHAPPILY RB
BUDGET-PRICED JJ
PEERLESS JJ
SNAKES NNS VBZ
REALLY RB
CABINETS NNS
NETWORK NN NNP VB
LYBRAND NNP
OVERHEAD NN JJ RB
ALLEVIATING VBG
BARRICADES NNS
RICO-FORFEITURE JJ
REMOVAL NN NNP
RENEGOTIATE VB
NATIONALISTS NNS NNPS
REALITY NN
250-MEGAWATT JJ
HAVE-NOT JJ
REALMS NNS
KORBIN NNP
LAVARO NN
WILPERS NNP
12,345 CD
MARCUS NNP
SHARING VBG NN
STOLLEY NNP
47.013 CD
LIDGERWOOD NNP
FLESH NN
APPLESEED NNP
CONSUMING NN
EMBARRASSMENT NN
WESLOCK NNP
EWING NNP
CLOSED-CIRCUIT JJ
ILL.-BASED JJ
DRACULA NNP
PICKUPS NNS
NURSERIES NNS
ENGAGING VBG JJ
IMPORTANTLY RB
EARNING VBG NN
INVOLVED VBN VBD JJ VB
DREADED VBN JJ
STRESSFUL JJ
MCINTYRE NNP
MIDCO NNP
DEFAULTED VBD JJ VBN
TURBEN NNP
INVOLVES VBZ
GOOSEY JJ
STRONGHOLDS NNS
PAVLOVA NNP
SOLID JJ RB
1983-1987 CD
FEB. NNP
PROVISIONS NNS
LESS-THAN-BRILLIANT JJ
MOTORIZED VBN NNP
FEAR NN VBP VB
WERKE NNP
ADJUSTABLE JJ
FEAT NN
INDEMNIFY VB
TRANSPLANTING VBG
LEGITIMACY NN
UNLICENSED JJ
NOW-DEFUNCT JJ
68.1 CD
1,050,000 CD
68.2 CD
DIRECTS VBZ
GROWTHS NNS
68.3 CD
NELLCOR NNP
SLEEPER NN
68.4 CD
68.5 CD
CAMBODIANS NNPS
MELODIES NNS
DECRIBED VBD
68.8 CD
68.9 CD
DEDUCTIBLE JJ
JOSEPHSON NNP
STATING VBG
D'ARCY NNP
GRISLY JJ
DYING VBG
DORIAN NNP
TERRORISTS NNS
PRECLINICAL JJ
REPACKAGED VBN
RATIFIED VBD VBN
SINGAPORE NNP
LONDON NNP JJ
INSTALLMENT NN JJ
DEGOL NNP
OUTGOING JJ
372.14 CD
REMOVED VBN VBD
DANBURY NNP
DIAGNOSTICS NNS NNPS
VEXED JJ VBN
RAFSANJANI NNP
CREPT VBD VBN
JIHONG NNP
REMOVES VBZ
STATION NN NNP
CAITLIN NNP
REPAYMENTS NNS
LOUNGE NN
39,400 CD
CHICAGO-STYLE JJ
HOOKING VBG
POSTMASTER NN
SEACOAST NN
SIDEWALK NNP NN
PAGURIAN NNP
LAPSED JJ VBN
SLOWDOWN NN
CONTINUING VBG JJ NNP
EVENINGS NNS
AIMED VBN VBD
LAPSES NNS VBZ
THOMSON NNP NN
992.7 CD
ANTEBELLUM JJ
DENOUNCING VBG
ELECTRONIC-PUBLISHING JJ
INTERLOPING VBG
AVENA NNP
GRANDMASTERS NNS
REALIZE VB VBP
FEED NN VB VBP
CONFUSED VBN JJ VBD
90.20 CD
FEEL VBP VB NN
INTELLIGENT JJ
PASSIVELY RB
MAILMEN NNS
FEES NNS
42-YEAR JJ
COLD-STORAGE JJ
FEET NNS
CONFUSES VBZ
CHARGE NN VBP VB NNP
RORER NNP
STEEPEST JJS
DYSTOPIA NN
UNSEATING VBG
STRENGTH NN
BROILER NN
ECSTATIC JJ
ALLENPORT NNP
COMMUNISTS NNPS NNS
SUNFLOWERS NNS
251,170,000 CD
LANGUISHING VBG
ENTITLED VBN VBD
NORTHINGTON NNP
GOULD NNP
NEEDLE-LIKE JJ
CREST NNP NN VB
KTXL NNP
REPUBLICAN NNP JJ
ENTITLES VBZ
UNDERWRITTEN VBN JJ NN
SKIRTING VBG
372.50 CD
PREVAILING VBG JJ
REALTY NNP NN
MEREDITH NNP NN
CRETE NNP
CENTERS NNS VBZ NNPS NNP
AMASS VB VBP
TELEPICTURES NNPS
BROADCASTERS NNS NNPS
MEDUSA NNP
STATISM NN
BERTOLOTTI NNP
GORILLA NN NNP
TRANSMISSION NNP NN
UNASKED JJ
TANTAMOUNT JJ
STATIST JJ
MCGUIRE NNP
KONNER NNP
TODDLER NN
NYLEV NNP
FORFEIT VB
380.80 CD
SEEKERS NNS
MINERVA NNP
ARMS-KICKBACK NN
HARDSHIP NN
SOLOW NNP
SHARPNESS NN
EQUIPS VBZ
COMMENCING VBG
PROPAGANDIZE VB
DARK-SQUARED JJ
SPECIMENS NNS
ACRIMONIOUS JJ
DAMNED RB
WITNESSING VBG
DISNEYLAND NNP
HARROLD NNP
EXCUSE NN VB
MERGER-RELATED JJ
BESET VBN JJ
INSTRUMENTATION NN
CORRIGAN NNP
84-YEAR-OLD JJ
CENTURY-OLD JJ
CIGARETTE NN
74.20 CD
804.3 CD
HAUNTING NN VBG
RACKING VBG
631,163 CD
TAKEOVER NN
AVERT VB
FICTITIOUS JJ
COLLECT VB VBP JJ
AVERY NNP
N.A. NNP
CHERISHED VBN JJ
DINKINS NNP
BEMOANING VBG
ORANJEMUND NNP
ITALIA NNP
MISSILE NN NNP
HEALTH-CONSCIOUS JJ
IDENTIFY VB VBP
82.50 CD
CHERISHES VBZ
KAISER NNP
74.35 CD
TAURUS NNP
CREWS NNS
DISSIPATE VB
PERMISSION NN
FRACTIONS NNS
MOAN VB
CONVEYANCE NN
PULLS VBZ NNS
MOAT NN
POLITELY RB
COMPLYING VBG
214,000 CD
COMPOSITE JJ NNP NN
10.958 CD
INTROVERTED JJ
CONTINUITY NN
ACRONYM NN
LASH-UP JJ
COMMENTED VBD
CHARLS NNP
BRIGGS NNP
HEMMER NNP
724.4 CD
Y-MP8-232 NNP
LAGOON NN
DRUG-RELATED JJ
COLLEEN NNP
DIGNIFIED JJ
MOTOREN NNP
74.48 CD
DIMMING VBG
GOOD-LOOKING JJ
ASCENDING VBG
N.C. NNP
SYSTEMWIDE JJ NNP
GANGLION NN
UNAMENDED JJ
SKIERS NNS
DISCOUNTED VBN VBD JJ
MORE-POWERFUL JJR
BULLFIGHTER NN
MISSING VBG JJ
FENDING VBG
BRIGHT JJ NNP
DISCOUNTER NN
70.5-POINT JJ
EQUITY NN NNP
FELL VBD JJ NN VBN
EMPATHIZE VB
U.S.-CANADA NNP
MOCK JJ
SIMEON NNP
FELT VBD VBN
SPOKESPERSON NN
EARTHY JJ
LESS-SERIOUS JJ
N.D. NNP
DISMAYED JJ VBN
KAISHA NNP
UNION-OWNED JJ
OVERSTRAINED VBN
TUNNEL NN NNP
CONCURRENCE NN
PARAPHERNALIA NNS
FEMA NNP
COLLEGE NN NNP
DOUBLEA-2 JJ
MISSION NN NNP
MODE NN NNP
EXCRETORY JJ
AMAZE VB
SYRACUSE NNP
FESTIVALS NNS
ALLOWABLE JJ
HEADACHES NNS
49-YEAR-OLD JJ
EDITORS NNS
BEDROOMS NNS
SUBTLETY NN
FEND VB
66.50 CD
FENN NNP
GARAGE NN
SOLVE VB
ONE-DAY JJ
TARZANA NNP
CO-PRODUCE VB
NAVAL JJ NNP
BACKDATED VBD
SLIGHTEST JJS
ROBESON NNP
GOUTY JJ
54.875 CD
INTRASTATE JJ
FLOODLIGHTS NNP
KORNREICH NNP
ONCE-STAID JJ
IRRITATED JJ VBN
STEPMOTHER NN
SECOND-PLACE JJ
DEFENDED VBD VBN
INDEMNITY NNP
COAST-TO-COAST JJ
VACILLATE VB
1.2965 CD
IRRITATES VBZ
OILS NNS
TRAIPSE VB
OTHERWISE RB
310.9 CD
GEOLOGICALLY RB
OILY JJ
DEFENDER NN
STRAVINSKY NNP
REUNION NN
58.50 CD
STALLONE NNP
ZAPFEL NNP
BETTER JJR RBR RB NNP JJ RBR|JJR VB
KUAN NNP
N.H. NNP
PRODDING VBG NN
SUPPOSEDLY RB NNP
MARDER NNP
APLENTY RB JJ
MORE-VOLATILE JJR
MIDST NN
IMPROVISED VBD
58.64 CD
9.482 CD
PERMISSIVE JJ
BLURTING VBG
SIDEWAYS RB JJ
PULSE NN
IMPROVISER NN
DESTABILIZE VB
FRACTIOUS JJ
OINK UH
RENEGE VB
G.M.B.H. NNP
BODIES NNS
230.5 CD
SHIITES NNPS
230.8 CD
YEARNING NN
EHRLICH NNP
FERC NNP
NAGYKANIZSA NNP
LEGITIMATE JJ
MULTIPLE-COLUMN JJ
58.75 CD
EMPOWERED VBN
GRASSLEY NNP
MAHARAJAHS NNS
GILLERS NNP
LEVAL NNP
N.J. NNP
NONSOCIALIST JJ
FERY NNP
MONGOLIA NNP
NEAR-MUTINY NN
SMIDGINS NNS
INCINERATOR NN
IDLED VBD VBN
SYCAMORE NN
MARCKESANO NNP
ALLOCATE VB VBP
CHARTS NNS VBZ
RAMADA NNP
NO-NO NN
BOZELL NNP
BUSINESS-PARTNERS NNS
80486 CD
JERRICO NNP
FEST NN JJS
HEALTH-BENEFITS JJ
STABBED VBN VBD
CHARACTERIZE VB VBP
150.2 CD
150.3 CD
150.7 CD
150.8 CD
AIT-LAOUSSINE NNP
HEATING NN VBG
1.6-LITER JJ
HIBERNIA NNP
MUNICIPAL JJ NNP NN
ROSENFELD NNP
DIAMOND-STAR NNP
WIGHT NNP
EMERGENCY-RELIEF NN
FORTUITOUS JJ
SKILLFULLY RB
58.97 CD
PRIVILEGED JJ NNP
TACKED VBD
SHELDON NNP
LUXURY-SUITE NN
RYERSON NNP
DETROIT-OVER-SAN JJ
MASTERMIND NN
GILLETT NNP
COALS-TO-NEWCASTLE JJ
OVERZEALOUSNESS NN
IMPCO NNP
WORDING NN
PRIVILEGES NNS
RAMIREZ NNP
TACKER NNP
SHIPPING-RATE JJ
REUNITE VB
HASSAN NNP
CHEMISTS NNS
GRACIOUSLY RB
REFUSING VBG NN
FEUD NN
CHEERING VBG
RESPONSIBLE JJ
CAUTIOUSNESS NN
TRAINERS NNS
MONTHLY JJ RB NN NNP
MOLD NN
CAYNE NNP
TRECKER NNP
STOP-LIMIT JJ NNP
MARBLE-ENCASED JJ
FETCHED VBD
POINTERS NNS
LATHAM NNP
N.M. NNP
RESPONSIBLY RB
UNDIVERSIFIABLE JJ
UNDEMOCRATIC JJ
21,000 CD
AVERTING VBG
FETCHES VBZ
MALIGNANCY NN
GOSHEN NNP
21.25-A-SHARE JJ
OVERREACT VB VBP
CHEERIOS NNPS
KOZINSKI NNP
ALONGSIDE IN RB
DEPORTED VBD
LEVEL NN JJ VB VBP NNP
HOTEL-CASINOS NNS
NAVIN NNP
GENERIC-DRUG NN JJ
STINGY JJ
LEVER NNP
FELDEMUEHLE NNP
SUB-UNDERWRITERS NNS
SPINOFFS NNS
ELECTROGALVANIZING VBG
MONA NNP
FLOCKING VBG
INITIATING VBG
DETAIL NN
RELABELING VBG
91-DAY JJ
KUHN NNP
PROPERTY\/CASUALTY NN JJ
MIRROR VB VBP NN NNP
MONT NNP
MEMBERSHIPS NNS
216.8 CD
YEARLONG JJ
ARVIND NNP
PACKAGING NN VBG
SELAVO NNP
IDENTITY NN
GABOR NNP
MOOD NN
HOPED VBN VBD
INITIATION NN
MOON NNP NN
GATHERING NN VBG
RESPOND VB VBP NN
REAMES NNP
FURTHERING VBG
MOOT JJ
HOPES VBZ NNS
FULFILLMENT NN
COUNTERMEASURES NNS
LOWERING VBG
73,100 CD
290,782 CD
EVAPORATED VBD VBN
SAVILLE NNP
ARTOIS NNP
BANKROLLING VBG
MYRON NNP
RE-ELECTED VBN VBD JJ
136.4 CD
GRINNING VBG
GIROUX NNP
MASS-MEDIA NNS
LATHES NNS
AMBER NNP
WITHDRAW VB
GUESSWORK NN
SCOOPED VBD
ACCIDENTS NNS
BROADENS VBZ
PRE-COLLEGE NNP
KRUGER NNP
SORENSON NNP
DEVELOPERS NNS NNP
LEVIN NNP
MEGA-HITS NNS
FUJIS NNPS
102.01 CD
581-7907 CD
PRESIDING VBG
CYANAMID NNP
102.06 CD
PUSHED VBN VBD
MCGUIGAN NNP
ETHANOL NN
SCHWARZWALDKLINIK NNP
PENNY-WISE JJ
ELLEN NNP
COUNTER-CYCLICAL JJ
ATRIUM NN NNP
MORE JJR RBR RBR|JJR JJR|RBR JJ RB
TACKLE VB VBP
LONG-TERM JJ NN NNP RB NNS
PUSHES VBZ
GALVANIZING VBG
TIE-VOLE-EE NN
IRANIAN JJ NNP
MORT NNP
BLACKBOARD NN
APPLAUD VB VBP
ROLLBACK NN
CINEMA NN NNP
PRE-EMPTIVE JJ
TRIPLE JJ RB VB
KUME NNP
PASCAL NNP
56-YEAR-OLD JJ
ROLY-POLY JJ
VASSILIADES NNP
LEVKI NNP
82ND JJ
GRABBING VBG
REPLICATED VBN
FROLIC VB
PROHIBIT VB VBP
A.T.B. NNP
MOSS NNP
CALCULATIONS NNS
MOST JJS RBS RBS|JJS RB JJ NNP
JILLIONS NNS
BEANBALLS NNS
102.25 CD
MACLELLAN NNP
PERKIN-ELMER NNP
FOREIGN-COUNTRY JJ
83.3 CD
GROWTH-STOCK JJ NN
83.4 CD
83.6 CD
83.7 CD
83.8 CD
FEMALE-HEADED JJ
BEVERAGES NNS
PRICE-STABILITY NN
BESTSELLER NN
FANTASY NNP NN
RECONSTRUCT VB
HARRINGTON NNP
TYKE NN
OVERVALUED VBN JJ VBD
ABSOLUTE JJ
PALAMARA NNP
ARAB-SPONSORED JJ
MOTS FW
MODESTY NN
48,100 CD
SCIENTISTS NNS
IMPLY VBP VB
INCRIMINATING VBG
FOULDS NNP
WITHDREW VBD
COMMONWEALTH NNP NN
FINMECCANICA NNP
HIGHER JJR RBR NNP
PETALUMA NNP
SEMI-PUBLIC JJ
THYSELF PRP
FOULED VBN
N.V. NNP
PRIVATIZED VBN JJ
WEDNESDAY NNP
WORST-CASE JJ
POROUS JJ
STAKE-HOLDING JJ
8300 JJ CD
FIREHOOPS NNS
FORMERLY RB
JAMAICAN JJ
BROADEST JJS
ATLAS NNP NN
BOUNCING VBG
INITIATIVE NN NNP
BROWBEAT VB
MOVE NN VB VBP
ELLIS NNP
TRIBUNE NNP
29-INCH JJ
RAMSHACKLE JJ
ILL-SUITED JJ
EFFICIENT-MARKET NN
EARNINGS-GROWTH JJ
HASSLE NN
RESERVOIR NN
COINCIDED VBD
INVESTOR-OWNED JJ
SCRIPPS NNP
PLESSEY NNP
WEIGHTING NN
GENTILE JJ
BANGLADESH NNP
ONE-QUARTER-CENT JJ
TOUCHED VBD VBN
ABOMINATION NN
COINCIDES VBZ
FOUR-BAGGER NN
SPARINGLY RB
SELL-ORDER JJ
TAX-LOSS JJ NN
TOUCHES NNS VBZ
BUMPERS NNP
DEMOLISHED VBN VBD
WANDERING VBG
AMBLE VB
PREFER VBP VB
LUNCHTIME NN
ILL-CONSIDERED JJ
ADVENTURE NN
BOUTIQUE NN
LAP-SHOULDER JJ
MCCASKEY NNP
BRINGING VBG NN
LONELY JJ
SCORECARD NN
BLESSING NN
TOBACCO NN NNP
DISCONTINUATION NN
BUTTRESS VB
PLIES VBZ
DONUTS NNP NNPS
FLUNKING VBG
9.9375 CD
CONSPICUOUSLY RB
N.Y. NNP
REPRESENTATIVES NNS NNPS NNP
KURT NNP
COMMUNICATIONS NNP NNPS NNS NN
PROSECUTORS NNS
YOU-KNOW-WHAT NN
ASTRONOMICAL JJ
47.125 CD
RENEWS VBZ
CD-TYPE JJ
CONFINEMENT NN
KUSE NNP
VEILED VBN
FOOD-SERVICES NNS
1,809,300 CD
MOUTH-UP JJ
DEODORANT NN
TYPE NN
CORRELATION NN
CONSERVATIVE-COMMUNIST JJ
SHOWERS NNS
69.1 CD
69.2 CD
ANTI-BALLISTIC NNP
69.4 CD
69.5 CD
ZHAO NNP
69.6 CD
69.7 CD
69.8 CD
PASCHI NNP
RATIONAL JJ
GUERRILLAS NNS NNPS
TOLERANCE NN
RESPECTFUL JJ
1523.22 CD
CONCLUSION NN
SHUDDERS NNS
ROCK'N NN
BURLINGTON NNP
ACHIEVABLE JJ
STINTS NNS
SCRIPTS NNS
AFFECT VB VBP NN
SHELTERS NNS
GOVERNMENT-BACKED JJ
LAUGHINGSTOCK NN
GARBAGE-INCINERATOR NN
STEALTH NNP
INTERVIU NNP
CAPTIONED VBD
CO-HOST VB
MOSSMAN NNP
TENDERING VBG
GAFFNEY NNP
ZAMYA NNP
OFF-OFF JJ
TYRE NNP
CHASED VBD
UPHEAVALS NNS
320,000 CD
JEFFERIES NNP
JOFFREY NNP
MINICARS NNS
WALMART NNP
ACROSS-THE-BOARD-CUTS NNS
HERCULES NNP NNS
ROMANTIC JJ
TRIBUTE NN
ARRAY NN
SURROUNDING VBG JJ
PITCHED VBD VBN JJ
ZERO-COUPON JJ NN
DATED VBN JJ
SUSCEPTIBLE JJ
889,000 CD
HIGHLY RB NNP
BEFALL VBP
MIDDLING JJ
LAPTEV NNP
MASAHIKO NNP
BUREAU-SPONSORED JJ
PITCHER NN NNP
BETAS NNS
PITCHES NNS VBZ
PERMIT VB VBP NN
ASTOUNDS VBZ
DATES NNS VBZ
DIVERSIFICATIONS NNS
453,000 CD
DISCREETLY RB
PERSUADE VB
SIPHONED VBN VBD
AVIATION NNP NN
HILLHAVEN NNP
NEOPRENE NN
AIRMEN NNS
ASTOUNDING JJ
SECRETARY-GENERAL NN NNP JJ
RESULT NN VB VBP
RHINO NN
RESPONSIBLILTY NN
934,242 CD
TEAMING VBG
ROSEN NNP
BLANKETED VBD
ROSES NNS NNPS
IMPUT NN
RESUME VB VBP NN
QUIESCENT JJ
RETRAINING VBG
RATIONED VBN
AMERITAS NNP
PROTRACTED JJ
461,200 CD
SAFEGUARDED VBN
WASTEPAPER NN
GLARES VBZ
AND\/OR CC
MONUMENTAL JJ
4,800-ACRE JJ
CHANTEUSE NN
MICROBE NN
CORKSCREWS NNS
DECATUR NNP
BULLET NN
MARRIED-PUT JJ
PROSCRIBED VBN
REPOSSESSED JJ
UNIVERSAL-RUNDLE NNP
NEOCLASSICAL JJ
INFLUENCING VBG
150,000 CD
NEEDHAM NNP
CRIPPLED VBN JJ
CONSCRIPT JJ
55.375 CD
TBOND JJ
HOBBYISTS NNS
PROSCRIBES VBZ
CULLINET NNP
GOLLICH NNP
CRIPPLES NNS
LOVABLE JJ
1507.37 CD
PREGNANCY NN
OUTBACK NN
EQUITY-INCOME NNP
PROJECTORS NNS
LANSING NNP
YASUO NNP
DANA-FARBER NNP
LUNCHROOM NN
UNACCOUNTED JJ
EMERSON NNP
MUSHROOM NN
HALF-STAFF JJ
RIDERSHIP NN
PASCUTTO NNP
DEVIATIONS NNS
AWARDED VBD VBN
LIQUIFIED JJ
WILLMOTT NNP
SOREHEADS NNS
RAILCAR NN NNP
TURBANS NNS
UNSAFE JJ
MILITANT JJ
ROSIE NNP NN
RELIANCE NNP NN
HANDED VBN VBD
EXPLUSION NN
REGULAR-SEASON JJ
LAUNDERING NN VBG
HERSELF PRP
POLLINATED VBN
THINGS NNS
MILWAUKEE-BASED JJ
LARGEST-EVER JJ
63-YEAR-OLD JJ
BERKELEY NNP NN
PLACEMENT NN NNP
428,000 CD
REPOSSESED JJ
GLADE NN
COMMISSIONING VBG
ANATHEMA NN
SAUSAGE-GRINDER NN
GLARIS NNP
GRITTY JJ
LIKED VBD VBN
365-DAY JJ
MEGADROP NN
BIRDCAGE NN
INDIAN JJ NNP
PRE-APPROVED JJ VBN
LIKES VBZ NNS NN
UNIMPEDED JJ
BALLPLAYERS NNS
CORPORATE-SECURITIES JJ
PERENNIAL JJ
CONVICTED VBN VBD
725.6 CD
725.8 CD
SKYROCKETED VBD VBN
PAN-AMERICAN JJ
VAUXHILL NNP
RICHSTONE NNP
PRODUCT-LIABILITY NN
EX-DIVIDEND NN JJ
125,000 CD
MASAHIRO NNP
DEFLATE VB
ATTACKING VBG NN
MUSIC-PUBLISHING JJ
L'OUEST NNP
BRUISING JJ VBG
INVERCON NNP
KILLING VBG NN
KINFOLK NNS
899.6 CD
899.8 CD
SHOWROOMS NNS
GARBER NNP
CHICANERY NN
BRAE NNP
INDICT VB
258,000 CD
OFFENDERS NNS
BRAG VB
35526.55 CD
BRAH FW
BRAN NN NNP
RULINGS NNS
POLLACK NNP
BRAT NN
MILITARY JJ NN NNP
VOLUNTEERED VBD VBN
ZUPAN NNP
FOODSTUFF NN
THINKS VBZ
KILLION NNP
20%-A-YEAR JJ
CONSUMER-ELECTRONICS JJ NNS
NOBUTO NNP
TIPTOED VBD VBN
KOLLMORGEN NNP
PUBLIC-POLICY NN
NABISCO NNP
PAY-IN-KIND JJ
BANANA NN NNP
UNSCIENTIFIC JJ
HOTLINES NNS
RIDLEY NNP
FOCUSED VBN VBD JJ
UNLUCKY JJ
LAPTOP NN JJ
PUMPS NNS
REFOCUS VB
THINLY RB
KAUFHAUS NNP
BILLIONNAIRE NN
FOCUSES VBZ
MILITATE VB
MARIANA NNP
LEAKING VBG
INTERGENERATIONAL JJ
INDIES NNP
REGION-BY-REGION JJ
BETTER-THAN-EXPECTED NN JJ
TECHNOCRATS NNS
ESOPUS NNP
STICKINESS NN
KAGEYAMA NNP
SINGLE-A-PLUS JJ
LYNCH-MOB JJ
SAVIMBI NNP
WELL-PUBLICIZED JJ
UNBELIEVABLE JJ
NABBING VBG
CANCER-SUPPRESSORS NNS
SANSUI NNP
VESELICH NNP
HAGGLINGS NNS
311.6 CD
LABOR-MANAGEMENT JJ NN
311.8 CD
CENTS NNS
MOVEMENTS NNS
EISZNER NNP
PROLONG VB
CITIZENRY NN
MIGUEL NNP
SHAPOVALOV NNP
DEBT-LIMIT NN
HANDLE VB VBP
SEEMINGLY RB
CENTRALLY RB
SMALLER-THAN-AVERAGE JJ
SPOTTY JJ
MONIKER NN
MCNEIL NNP
GEOGRAPHIC NNP JJ
PRECEDENT NN JJ
BREA NNP
BRED VBN VBD
DOUBLE-WING JJ
AUTOMAX NNP
COMPUTER-DISTRIBUTED JJ
HESITANT JJ
SOURING NN
QUOTING VBG
ROBINSON NNP
CHILLING JJ VBG
ARTHURIAN JJ
CROOKERY NN
BREW VB NN
TAUNTED VBD
REGIONS NNS
INCENTIVE-BONUS NN
MCELROY NNP
ROOFTOPS NNS
INTIMIDATIONS NNS
COMMERCIAL-PRODUCTS JJ
CRAVEN NNP
GROUND-HANDLING NN NNS
PREPAID JJ VBN VB
WAREHOUSES NNS
LEAGUES NNS NNPS
PIPELINES NNS NNP NNPS
SPECIALTY-MATERIAL JJ
ARROW NNP NN
SLIDE-PACKS NNS
DRAFT NN VB
NON-LETHAL JJ
ISOLATION NN
PARAGRAPHING NN
757-200S NNS
AUDIBLE JJ
TRANSFERS NNS VBZ
CHASTE JJ
SHORT-CIRCUITED VBN
MOPPING VBG
HOOKED JJ VBD VBN
GERALDO NNP
125,075 CD
PHARMACEUTICAL JJ NNP NN
90,000 CD
CICHAN NNP
REBUILD VB
THIERRY NNP
HOOKER NNP
NOONAN NNP
NON-INTERVENTIONIST JJ
DRAGO NNP
DICTATORS NNS
CONFIDENCE NN NNP
MATSUDA NNP
ROSSI NNP
DRAGS VBZ
OVERFLOW NN
PECULIAR JJ
REBUILT VBN
151.2 CD
SIX-WEEK-OLD JJ
6,930,000 CD
ATTACHE NN
IGDALOFF NNP
151.8 CD
CARPENTER NNP NN
LEAKED VBD VBN
CLAVIER NN
PIN-POINTED VBN
RISK-FREE JJ
BUNCHES NNS
KNEADED VBN
ODDITY NN
BANKRUPTY-LAW NN
PILOT-MANAGEMENT JJ
COLLECTIVIZERS NNS
SENDERS NNS
NEAR-MARKET JJ
DATUK NNP
RUBEL NNP
ASCERTAIN VB
KNEADING VBG
COMPANY-OWNED JJ
REPRESSING VBG
ARCHIVE NNP NN
BRIE NN
STEAMED VBD VBN
SHELBYVILLE NNP
CLUTTER NN VB
DOCTORATE NN
MASSACHUSETTS NNP
KNEE-SOCKED JJ
BROTHERS NNPS NNP NNS
BRIM NN
MITSUOKA NNP
DRAIN NN VB
CORTES NNP
FRONT-RUNNER NN
ADVISING VBG NN
JOERG NNP
SEGREGATION NN
GEORGE NNP
SUITORS NNS
FILTRATION NN
LOBSENZ NNP
SCANDALIZED VBD
ROPE-SIGHT NN
AMCAP NNP
CATHARSIS NN
HIGH-VOLUME JJ
BEAVERTON NNP
274,475 CD
REPRESSION NN
BENDECTIN NNP
CONTRACT-STEERING JJ
LOCKHOLD NN
FAST-TRACK JJ
HESITATE VB VBP
1,843,000 CD
REEBOK NNP
UNDERSCORE VBP VB NN
PATTERN NN
PERMISSIBLE JJ NN
3,800-MAN JJ
ANIMATED JJ VBN
BETSY NNP
DRAKE NNP
PERCENTER NN
PROPRIETORS NNS
8-TO-5 JJ
MAGGIE NNP
PORK-BARRELERS NNS
ATTACKS NNS VBZ
REMOTELY RB
CANARY-COLORED JJ
BETTE NNP
217.5 CD
WHEEZING VBG
217.9 CD
BEVERAGE NN NNP
ANTIMISSILE JJ
83.3125 CD
NONLETHAL JJ
FOOD-SERVICE NN JJ
65,000 CD
GUERRILLA NN
GREEDIER JJR
BETTY NNP
PADOVAN NNP
GLARE NN
LESS-PROFITABLE JJ
CENTRALE NNP
OVERINCLUSION NN
GANNETT NNP
REFILLABLE JJ
ABRAMSON NNP
CRAF-CASSINI NNP
EQUIFAX NNP
HOTLINE NNP
JOURNALISTIC JJ
APPEARING VBG
CREATED VBN VBD
PRE-MAY JJ
RUBIK NNP
MILUNOVICH NNP
TABLOID JJ NN
RUBIN NNP
MISMEASUREMENTS NNS
HASTEN VB
LIGHTNING NN
DRAMA NN
YATES NNP
GEOGRAPHY NN
CREATES VBZ
PLANTERS NNP
ROADWAYS NNS
HOKKAIDO NNP
UPGRADED VBN VBD
STREPTOKINASE NNP
EXTREMES NNS
AMBASSADORS NNS
150TH JJ
BETRAYAL NN
COMEBACK NN NNP
SUPERBLY RB
DRAMS NNS NNPS
TWEEZERS NNS
88-POINTS JJ
GLASS NN NNP
137.2 CD
UPGRADES NNS
MYSTERY NN
137.4 CD
137.5 CD
137.6 CD
AUTODESK NNP
AMBULATORY JJ
INEFFECTIVENESS NN
137.8 CD
WILD-EYED JJ
STARDENT NNP
SIDELINE-BUSINESS JJ
TRUCKING NN NNP
LESS-CYCLICAL JJ
20.125 CD
BASHERS NNP
UNITOURS NNPS
RUSSELL NNP
BACTERIA-FREE JJ
SNEAKY JJ
WILCOCK NNP
MOSLEM NNP
ACTIVES NNS
TABLOIDS NNS
LEXICON NN
AUDIOPHILES NNS
NACION NNP
LIKUD NNP
EURODEBT NNP
EMBARKED VBD VBN
PREFERRED-SHARE NN JJ
MASILLON NNP
SONAR NN
22-MONTH-OLD JJ
LEWIS NNP
DISLIKE NN VBP VB
DESTROYING VBG
DISSOCIATE VB
SHIMIZU NNP
LESSEN VB
FRIENDSHIP NN
OUNCES NNS
LESSER JJR NNP
PREPARE VB VBP
CASSETTES NNS
UNHINGED VBN
RUBINS NNS
BROS NNP NNPS
INDIRA NNP
RUBLE NN FW
PRECAUTION NN
BROW NN
RENEGADE NN
RESHUFFLING NN VBG
SUCCESSIVELY RB
LABAND NNP
FARLEY NNP
BUSINESS-AS-USUAL JJ
PSYCHE NN
INTERWAR JJ
ALBUQUERQUE NNP
DRAPE VB NN
84-6 JJ RB
SHERATON-PAN NNP
HAAG NNP
ESCALATORS NNS
DECEIVE VB
SOLELY RB
KAZAKH NNP
SPRECHER NNP
THURBER NNP
HAAS NNP
MASS-DISTRIBUTION JJ
12,500 CD
OUTLAWED VBN VBD JJ
APOLLO NNP
APPLICATIONS NNS
CO-PILOT NNS
GUESS VBP VB NN
REPRESSIVE JJ
GUEST NN JJ
84.1 CD
84.3 CD
UNCRITICAL JJ
SOLEMN JJ
84.4 CD
HARTIGAN NNP
FAILS VBZ
BETRAYED VBN
84.7 CD
35-YEAR-OLD JJ
84.9 CD
VISUAL JJ
JERKED VBN
WITHSTAND VB
MILES-PER-HOUR JJ
BETRAYER NN
MAGGOT NNP
CLOSINGS NNS
EXPLANATION NN
COOPERMAN NNP
DISAGREE VBP VB
SOCALLED JJ VBN
ACQUIT VB
OVERSEAS JJ RB NN NNP
CALIBRATED VBN
SPEEDED-UP JJ
BEGGING VBG
PAYOUTS NNS
CATTRALL NNP
HACK VB
SUITABLE JJ
DESKTOP NN JJ NNP
GLAXO NNP
ENTAIL VB
MISLAID VBN
MONKEYS NNS
DISCERN VB
SONET NNP
COMPUTER-EDITED JJ
REUPKE NNP
VARIATION NN
JAPAN-U.S NNP
LOWENTHAL NNP
POUNDED VBN
CIVILIAN JJ
PARTNERSHIP NN NNP
OUTPOSTS NNS
FAINT JJ VB
GREEDILY RB
RETREAT NN VB
MANDINA NNP
WHEEL-LOADER JJ
DUPLICATE VB JJ
TREPIDATION NN
WORD-PROCESSING NN NNS
SALVAGED VBN
EXERCISABLE JJ
UNDONE VBN
MILITIA NN
MEDICAL-LEAVE JJ
PAGEANTRY NN
PEDUZZI NNP
ERSKIN NNP
SINGLE-FAMILY JJ NN
RAINED VBD
GLAZE VB VBP
ROCKED VBN VBD
DRAMAS NN
LOOSENED VBN
AGE-BIAS JJ
AUTOMATICALLY RB
SINGLE-STORE JJ
MINICOMPUTER NN
DREAMS NNS VBZ
DREAMT VBD
RAINER NNP
VANDALIZED VBD
REDEFINE VB
EXPORT NN VB NNP JJ VBP
RAINES NNP
DREAMY JJ
SHREWDER JJR
EMBARGOED JJ VBD
ROCKET NN
HEBERTO NNP
BARTERED VBN
SONGS NNS
FOSSAN NNP
STRONGER-THAN-EXPECTED JJ
WAXMAN NNP
DISPATCHING VBG
ADMITTEDLY RB
KRUPP NNP
PRICE-DEPRESSING JJ
EXPOSE VB VBP
EMBARGOES NNS
SIMULATIONS NNS
CARPENTRY NN
DENTAL JJ
GENERATORS NNS
GRANTING VBG
PENNY-ANTE JJ
EXTREMELY RB
SPONTANEOUSLY RB
DELIBERATIONS NNS
OVERSEEN VBN
FOMENTING VBG
DEPORTATION NN
STREAMING VBG
OVERSEES VBZ
PARTICIPANTS NNS
LOANED VBD VBN
HAUNTS NNS VBZ
BYZANTINE JJ
DEEPER JJR RBR
LABATT NNP
SONIA NNP
SECOND-LARGEST JJ
MULTIPARTY JJ NN
HASTERT NNP
DRAVO NNP
SWEDISH-SWISS JJ
PUNCH NN VB VBP
ELSEVIER NNP
INTREPID NNP
MARKETIZATION NN
VERDICTS NNS
MOTION-CONTROL NN
PARK-AFFILIATED JJ
FIREBIRD NNP
ACQUITTAL NN
TACCETTA NNP
GEOMETRY NN
500-BED JJ
CREATOR NN NNP
REVEALS VBZ
DISTRICT\/STATE NN
FREEZER NN
FREEZES VBZ NNS
FAIRS NNS
RUSSIAN-LANGUAGE JJ
DISMEMBER VB
CZESLAW NNP
COMEAU NNP
DRAWL NN
SONJA NNP
FAIRY NN
RESERVE NNP NN VB VBP JJ
DRAWN VBN
DEMOCRATIC-CONTROLLED JJ
HAHN NNP
FERRUZZI NNP
DRAWS VBZ NNS
FLOTATIONS NNS
PALED VB VBD
PRODUCTION NN NNP
CONSECO NNP
PROJECTS NNS VBZ NNPS NNP
ONE-YEAR-OLD JJ
LORENTZ NNP
REASSURANCES NNS
GENERICALLY RB
BULKHEADS NNS
PALES VBZ
E-MAIL NN
534,000 CD
820.4 CD
CURTAILED VBN VBD
PAYABLE JJ
HAIL NN
TRAFFICKER NN
HAIR NN
COSTLIER JJR
SPECIFIC JJ NN
RICCARDO NNP
REAFFIRMING VBG
ORRICK NNP
BELOW-MARKET JJ
PRECISE JJ
FAITH NN NNP
COLD-CUTS NNS
292.32 CD
GUIDED VBN VBD
TURBOGENERATOR NN
FOSSET NNP
LESSON NN
MUNICIPALITY NN
CHRONICALLY RB
RECALCULATIONS NNS
FOSSEY NNP
OBSERVERS NNS
HARVEST NN VBP
HIGH-PROFILE JJ
ILFORD NNP
GUIDES NNS NNPS NNP
HANS-DIETRICH NNP
CARDIAC JJ NNP
SOARES-KEMP NNP
DREARY JJ
MININUM-WAGE NN
12,591 CD
PROGRAMMERS NNS
INGERSOLL NNP
231,000 CD
STIFFER JJR
LISTLESS JJ
OKAY JJ UH
LEATHERS NNS
DAMAGING JJ VBG
VERIFIABLE JJ
OWNED VBN VBD JJ
COMEDY NN NNP
ACQUITTED VBN
3655.40 CD
CASHED VBN VBD
PRO-CONSUMER NN
ULTIMATELY RB
OWNER NN NNP
HEALTH-CARE-PRODUCT NN
GUERRILLA-HELD JJ
CO-LEAD JJ
OVERCROWDING JJ NN
HALE NNP
MAYORS NNS
HALF NN PDT DT JJ RB
SEWAGE NN
GLASER NNP
HALL NNP NN
LITVINCHUK NNP
INADVERTENT JJ
DUTCH-DESCENDED JJ
AUTOIMMUNE JJ
COSTUMED VBN
HALO NN
SCURRY VB
ANTI-INFECTIVES NNS
HALT NN VB VBP
SINGLE-JOB JJ
INSPECTORS NNS VBZ
GIVENS NNP
FRINGES NNS
TAX-EVASION NN
ZIFF NNP
CITY-WIDE JJ
SIX-YEAR JJ
SHREWDLY RB
6:30 CD
COSTUMES NNS
SHIELDING VBG
SONNY NNP
HALF-TIME NN
BURDEN-SHARING NN
526.79 CD
VORONTSOV NNP
ABSURD JJ
STOCKHOLDER NN
AGITATED VBN
LOQUACIOUS JJ
ELCOTEL NNP
UNRIVALED JJ
GINSENG NN
PREPAREDNESS NN
BOTTLED JJ VBN
PERMANENTLY RB
FOSSIL NN JJ
NYNEX NNP
SALVAGNI NNP
MATCHED VBN VBD
MIL-SPEC NNP
VARNISH NN
11-WEEK JJ
BARABBA NNP
HAND NN VB RB
BOTTLER NN
SUBCOMMITEE NN
BOTTLES NNS
HANG NNP VB VBP
BATTALION NN
TETE-A-TETE NN
HANI NNP
SCANDINAVIA NNP
ROTHE NNP
HANK NN
DEEPLY RB
ALL-DAY JJ
MATCHES VBZ NNS
HANN NNP
WILLSON NNP
LORENZO NNP
HANS NNP
DAMPED VBN VBP
LANGUAGE-HOUSEKEEPER JJ
CLYDE NNP
UNAWARE JJ
INTERACTIONS NNS
6:50 CD
DAMPEN VB
PRYING JJ
DAMPER NN
194,000 CD
580.4 CD
GALLOWAY NNP
580.6 CD
806.7 CD
ROTIE NNP
806.8 CD
ELEPHANTS NNS
HIGH-ROLLING JJ
PRODUCTIVE JJ
MESIROV NNP
WILBER NNP
UNDERWORLD NN
HEARTWISE NNP
FOUR-QUARTER JJ
CARDIFF NNP
UNFLATTERING JJ
CASHIN NNP
PUNKY JJ
FRONT-RUNNING JJ
SANTOS FW
WRONGFULLY RB
UNREMARKABLE JJ
LEGENDARY JJ
LANDOWNERS NNS
9.617 CD
FLIERS NNS
SUPERCILIOUS JJ
COASTAL NNP JJ
WAFERS NNS
REAUTHORIZATION NN
PALMA NNP
SPIRITS NNS NNPS
PALME NNP
42-YEAR-OLD JJ
ORANGE-AND-BLUE JJ
OHIOANS NNPS
SEARCHING VBG
ACCESSORIES NNS NNP
BOWATER NN NNP
ENGINE NN NNP
HURTADO NNP
STEAMING VBG
SEIZURES NNS
BUYERS NNS
MIG-1 JJ
PALMS NNS NNPS
RECAPITALIZED VBN
9.625 CD
CALDWELL NNP
OUTSTRIP VB
BROCHURES NNS
OUTER JJ
MATERIAL NN JJ NNP
VINYL NN
DISCREET JJ
GRAVEL-CHEWING JJ
PICTURING VBG
LENDER NN
HARA NNP
HARD JJ RB NNP
MAOISTS NNPS
SUMMARIZED VBD
JACQUELINE NNP
SCHAEFER NNP
HAWAIIAN JJ
LAROSA NNP
RUDDER NN
SOLIDARITY-LED JJ
GIVETH VBZ
HARM NN VB VBP
FRAGRANCE NN
GROUNDS-CARE JJ
HARP VB
POSSESSING VBG
HART NNP
MERCK NNP NN
NUMERAL NN
DEMONOLOGIST NN
KIRKPATRICK NNP
MERCY NN
INVOICES NNS
UNSETTLEMENT NN
MOCKING VBG
ILLUSTRATE VBP VB
MISSISSIPPIAN NNP
REACHED VBN VBD
HIGH-RISES NNS
REPAID VBN VBD
EX-WIFE NN
POSSESSION NN
INTERESTED JJ VBN
SPORT-UTILITY JJ
CONSENT NN NNP VB
REDIRECTED VBN
REACHES VBZ NNS
MALAY-BASED JJ
PENNINGTON NNP
ATTEND VB VBP
NECESSARILY RB
FREEBERG NNP
HATE VBP VB NN
REPAIR NN VB VBP
COASTED VBD
240-A-SHARE JJ
FONCIER NNP
DENTON NNP
HEAVENS NNS
BEWILDERING VBG
HATS NNS
COASTER NN
ZINC NN
NIPPON NNP
STELLAR JJ NNP
DEDICATED VBN JJ VBD
EDITING\/ELECTRONIC JJ
OMNIBUS NN JJ
DETERMINE VB VBP
INSULATING VBG
IMPERFECT JJ
NELMS NNP
SPOUSE NN
WORKROOM NN
PROXY-SOLICITATION JJ
FIXING VBG
ELKINS NNP
9.664 CD
OKLA NNP
HINZACK NNP
TRIANGLES NNS
HAUL NN VB
MATERIEL NN
STOCK-HOLDING JJ
LOW-LEVEL JJ
ECONOMETRIC JJ NNP
PAPER-PRODUCTS NNS
PASQUALE NNP
268.98 CD
Y.J. NNP
ZAHARAH NNP
MORALLY RB
SURFEIT NN
CORROON NNP
HAVE VBP VB NNP JJ VBD VBN
RESIDENCES NNS
9.671 CD
INSULATION NN
SPRINGS NNP NNPS VBZ
UNDERGONE VBN
REALISTS NNS
GARCIA NNP
COMPUTER-SOFTWARE NN
UNFOUNDED JJ
ACKNOWLEDGED VBD VBN JJ
PARIS-BASED JJ
ETERNAL JJ
SECOND-QUARTER JJ NN
PLUTONIUM NN
MERGE VB VBP
SOUTHBROOK NNP
KWAN NNP
SOMEDAY RB
CLINTONVILLE NNP
ASMARA NNP
WARDROBE NN
EXPLETIVE NN
CORCORAN NNP
ACKNOWLEDGES VBZ
DISMAL JJ
SNEAKED VBD
SAALFELD NNP
MUMMIES NNS
HOSOKAWA NNP
M-WHATEVER NNP NN
486.1 CD
ATHLETICS NNS NNP
POLYETHYLENE NN
486.6 CD
SHEAF NN
ELECTRO-OPTICAL JJ NNP
DISMAY NN
WAVELENGTHS NNS
STYLISTIC JJ
2170.1 CD
SNEAKER NNP
HAWK NN VBP
CIVILITY NN
PENSIONS NNS
350-SEAT JJ
ENROLLMENTS NNS
GALSWORTHY NNP
TANKED VBN
232.3 CD
232.4 CD
SANCTUARY NN
232.6 CD
LILLO NNP
232.8 CD
ARSON NN
TANKER NN
LILLY NNP RB
UNNERVED VBD JJ
BANKING-RELATED JJ
PERFECTA NNP
FOUNDATIONS NNS
145.21 CD
REACTING VBG
666,666 CD
STIRRING VBG
VAGRANT JJ
DENTSU NNP
SMOKESTACK NN
MYTHS NNS
DRIFTING VBG
PUNTS NNS
BLANDNESS NN
LOW-MARGIN JJ
MERIT NN VB VBP
JACKETS NNS
SCANDAL-STENCH NN
VORTEX NN NNP
IMPASSIBLE JJ
MULTIMILLION-DOLLAR JJ
RECREATION NN NNP
SHUTTERING VBG
ABORTIONIST NN
MC68030 NNP
REACTION NN
HAYS NNP
ATTEST VB
AUREUS NN
DEPRECIATION NN
NEEDING VBG
PHILADELPHIA NNP
WESTERN-STYLE JJ
RECTANGLES NNS
OBVIATE VB
137.20 CD
HYPOTHETICAL JJ
CLEARED VBD VBN
145.45 CD
KWEK NNP
FOUR-SQUARE-BLOCK JJ
PETROVICH NNP
SOPHISTICATED JJ
MATANKY NNP
SNYDER NNP
METHANOL NN
ACADEMICALLY RB
SELASSIE NNP
CANCELS VBZ
SAVINGS NNS NNP NNPS NN
CLEARER JJR
COVENANT NN
BRUSHOFF NN
SPILLOVER NN
MOISTURIZERS NNS
13,000 CD
BELIEVED VBN VBD
SEAFOOD NN
SOPHISTICATES NNS
HATHCOCK NNP
CHANNING NNP
FASHION NN NNP VB
PLURI-PARTY JJ
KOWTOW VB
ADVANTAGE NN VB
COMETS NNS
MEGABYTE NN
BELIEVER NN
BELIEVES VBZ
BUTTONS NNS
COMPETED VBD VBN
STAFFING NN NNP VBG
SHEEP NNP NN
BATTLING VBG
SHEER JJ NN
SHEET NN
EKONOMICHESKAYA NNP
PEACE NN NNP
MERLO NNP
COMPETES VBZ
DRAFTSMEN NNS
OCCUPANCY NN
EXPRESSING VBG
ELECTRODES NNS
WATERTOWN NNP
GAS-DERIVED JJ
INDUSTRIAL-PRODUCT NN
129.22 CD
129.24 CD
BLAGGS NNP
PROCEDURAL JJ
PREVALENT JJ
MEGA-PROJECTS NNS
129.25 CD
PREMIERING VBG
RECOVER VB VBP
HEREAFTER RB
DYLAN NN NNP
HOUSING-ASSISTANCE JJ
ERITREAN JJ
KIRIN NNP
TRADEOFFS NNS
124,732 CD
AGREEING VBG
MCDERMID NNP
DESMOND NNP
TEMPLE-INLAND NNP
CRANKCASE NN
OKLAHOMA NNP
FINALLY RB
EXPRESSION NN
HEATEDLY RB
AIRLINE-RELATED JJ
HORDE NN
153.93 CD
129.38 CD
SUPERVISORS NNS NNPS
18-SCREEN JJ
FORSTMANN NNP
1,754,000 CD
SUPERVISORY JJ
CARBONI NNP
YAMASHITA NNP
VITARINE NNP
ARISEN VBN
OLLARI NNP
COMFORTED VBN
MOUSSELINE NN
UNFLAGGINGLY RB
ARISES VBZ
INTIMIDATE VB
CONTENDING VBG
FRONDS NNS
CHAMPION NN NNP VBP JJ
129.48 CD
129.49 CD
FLIPPING VBG
KOREAN JJ NNP
DELIGHT NN VB VBP
ENCLOSING VBG
DRYDEN NNP
E-2C NNP
RAPESEED NN
SURFERS NNS
OUTWEIGH VBP VB
CRAWLS VBZ
OUTGREW VBD
FEWEST JJS
TAPERS VBZ NNS
UNCOMFORTABLE JJ
COCOTTE NN
SPLENDID JJ
DOCUMENTARIES NNS
2076.8 CD
WILBUR NNP
145.96 CD
AMDEC NNP
OPULENCE NN
UNLOVED NNP
138.4 CD
DEPLORES VBZ
PRUDENT JJ
DEPLETE VB
10-CENT-A-SHARE JJ
HARRISON NNP
SPRENGER NNP
LONGER RB RBR JJR
MUSKEGON NNP
ENDORSING VBG
REVIVING VBG
13,056 CD
CALGENE NNP
SLEIGHT NN
BIGGER JJR RBR
129.62 CD
FEATHERS NNS
UNION-MANAGEMENT JJ
129.63 CD
DISCRETE JJ
PACWEST NNP
RETABLOS FW
PROCEDURES NNS
QUICK JJ NNP RB
EQUIVALENT NN JJ
GRANDSIRE NNP
CANCERS NNS
BOESKYS NNP
ISRAEL NNP
EPIDEMIC NN
STRESSING VBG
UNGENTLEMANLY JJ
HARBANSE NNP
INNOVATION NN NNP
DYLEX NNP
CONTINENTIAL NNP
REFORM-MINDED JJ
KENNEY NNP
ALGONQUIN NNP
DENYING VBG
LESTER NNP
SUFFICIENT JJ
129.72 CD
METEOROLOGICAL JJ NNP
GAPING JJ
DISCONTINUANCE NN
MEAGHER NNP
APOLOGETICALLY RB
ACTIVISTS NNS
BAKERSFIELD NNP
FARMER NN NNP
INVINCIBLE JJ
RAMTRON NNP
SCHOOLBOYS NNS
PALESTINE NNP
SPROUTING VBG
CLEARLY RB
MERRY NNP JJ
64.125 CD
SHELF NN
LASTING JJ VBG
PRE-MERGER JJ
129.84 CD
MERSA NNP
SHELL NNP NN VB JJ
HINDERING VBG
129.87 CD
NEUROLOGIST NN
DOWNGRADE NN
PILING VBG
RESERVATIONS NNS
TOP-SECRET JJ
QUIET JJ VB NN
PEN-AND-PENCIL JJ
KIROV NNP
85.1 CD
FONDLY RB
STOCKED VBN
NEW-CAR NN
85.3 CD
DISABILITY NN
EMOTIONS NNS
ONE-STORY JJ
INDIVIDUAL-INVESTOR JJ NN
THIRD-RANKING JJ
85.7 CD
129.90 CD
85.8 CD
129.91 CD
LOOMING VBG
GEDULD NNP
640,000 CD
LONDON-BASED JJ
RECIPE NN
HARTLEY NNP
129.97 CD
E-71 NNP
M.B.A. NNP NN
LONG-SHELF-LIFE JJ
SOMETIMES-TAWDRY JJ
FISHERMEN NNS
PASSBOOK NN
ROCKETING VBG
PEAKE NNP
BIGGIE NN
BUNKO-FORGERY NN
FRANCHISEES NNS
FULLY RB
EXPRESSIVE JJ
14-YEAR-OLD JJ
TRETTIEN NNP
PINCUS NNP
AGILITY NN
PEAKS NNS
CONSIDERING VBG
ENVIRONMENT NN NNP
BRISTLE VBP
WAFFEN NNP
LEASABLE JJ
PRIOR-NOTICE JJ
KWON NNP
JUNK-BOND NN JJ NNS
EXTERNALLY RB
MICHELMAN NNP
THREE-POINT JJ
BEHAVED VBD VBN
INCONVENIENT JJ
CALCULATED VBN JJ VBD
RICHMOND NNP
PEALS NNS
FEARLESS JJ
REGIMENTATION NN
UP-SCALE JJ
MILDEWY JJ
HARD-BOILED JJ
INAUSPICIOUS JJ
BEHAVES VBZ
35585.52 CD
INTERLAKE NNP
CALCULATES VBZ
CUT-RATE JJ
OBNOXIOUS JJ
HARD-LINER NN
SPLENDOR NN
EVIDENCED VBN
ASILONE NNP
RED-FIGURED JJ
REHABILITATED VBN
ENCYCLOPEDIC JJ
470,000 CD
PHRASING NN
DEMOULIN NNP
FEDERATION NNP NN
SMALL-INCISION NN
CHAMPAGNE NN NNP
ESTABLISHMENTS NNS
INDELIBLE JJ
BULGING VBG
WARNINGS NNS
RIP-ROARING JJ
ANXIOUSLY RB
11.625 CD
39.125 CD
FORRESTAL NNP
FOUR-CENTS-A-SHARE JJ
HORNE NNP
BRISTOL NNP
DEPARTMENTSTORE NNP
ISAAC NNP
INNOVATIVE JJ
MCDONOUGH NNP
WASHABLE JJ
ANXIOUS JJ
1.6030 CD
DISSOLVE VB
DISENCHANTED JJ VBN
HORNS NNS
FALSIFYING VBG
TAKEOVER-STOCK JJ NN
FEARSOME JJ
OBJECT VBP NN VB
SHERE NNP
615,000 CD
MUTUALLY RB
SPITZENBURG NNP
TROUBLEMAKERS NNS
TAKEOFF NN
POINTLESS JJ
ACTIVELY RB
INVESTMENT-TAX JJ
BLUISH JJ
SPECTATORS NNS
PROTEGES NNS
MERYL NNP
DIAGNOSED VBD VBN
INCREDIBLE JJ
NEAR-RECORD JJ
IBERIAN NNP
TORONTO-AREA JJ
RAKING VBG
ATTRACTIVELY RB
REBELLED VBD
MOGAVERO NNP
STOCKPILES NNS
INCREDIBLY RB
QUILL NNP
JURY-RIGGED VBD
BROUHAHA NN
HINDERS VBZ
QUILT NN
1.6055 CD
REINVENTED VBD
DENUDE VB
5\/8 CD
NEWSMAN NN
SAWYER NNP
TUGGED VBD
1,450,635 CD
990.79 CD
MENSWEAR NN
KNIGHT NN NNP
8\/32 CD
STATEMENTS NNS
PAJAMA NN
ARGYLL NNP
WORKED VBD VBN
SELF-DESTRUCTED VBD
FOSTER NNP JJ VB
NORTHWESTERN NNP
PEARL NNP
ROTHSCHILD NNP
WAFFLE NN
AIR-INTERDICTION NN
CAVENEE NNP
WORKER NN
PEARS NNS
FORRESTER NNP
GRACIOUS JJ
QUINA NNP
UTMOSTS NNS
INACCURACY NN
THIRTEEN CD
NURSING NN VBG NNP
HANSHIN NNP
QUINN NNP
JANESVILLE NNP
HUNKER VB
PROGRAM-TRADING JJ NN
WARRANTS NNS VBZ
OLAV NNP
FULTZ NNP
OLAY NNP
INDEX-ARBITRAGE NN JJ
LABOR-BACKED JJ
WARRANTY NN
VERRET NNP
SUPERSTARS NNS
RECLAIM VB VBP
NETWORKS NNS NNP NNPS
UNDERESTIMATED VBN VBD
HORSE NN NNP
PETIPA NNP
VANITIES NNS NNP
OPENS VBZ
CLAIROL NNP
WALKING VBG NN VBG|NN
LEXUS NNP
ROUTED VBN
ENCOURAGINGLY RB
MIGHT MD NN
SHOWDOWN NN NNP
HAMILTON NNP
HINTED VBD VBN
HORTA NNP
MOSLEMS NNPS NNS
SECONDBIGGEST JJS
DIAGNOSIS NN
ROUTES NNS VBZ
QUOTA-CHEATERS NNS
TANGIBLE JJ
SHOPLIFTING NN
MARCHING VBG
MIDDLE-AGED JJ
GRIDLOCK NN
RADIOPHONIC JJ
LOW-PROFILE JJ
LIMAN NNP
QUIPS VBZ NNS
COLLEGE-SPORTS JJ NNS
350,000-SQUARE-FOOT JJ
275,000 CD
BICYCLE NN NNP
CADWELL NNP
FRONTS NNS
MARCOSES NNPS
CENTERING VBG
SUGARMAN-LED JJ
ROUGE NNP
BUCKSHOT NN
ROUGH JJ
DISHWASHERS NNS
LEDGERS NNS
PRATAP NNP
CO-VENTURE NN
ADEQUACY NN
BACKFLIPS VBZ
OLDS NNS NNP
LIMBO NN
LEONARDO NNP
DAYLIGHT NN NNP
LIMBS NNS
HELSINKI NNP
BENEFACTOR NN
UNSIGNED JJ
SKETCH NN
PRECARIOUSLY RB
DICTATED VBN VBD
SIX-FIGURE JJ
SLITHERED VBD
OLEG NNP
DAVID NNP
ON-AGAIN JJ
LONGUE NN
CALCULATOR NN
CENTERIOR NNP
STUDDED VBN
ELECTRONIC-SYSTEMS NNS
PASSPORTS NNS
DICTATES VBZ NNS
PLASTICS-INDUSTRY NN
NOMURA NNP NN
OMNICOM NNP
OUSTED VBN VBD JJ
SCHNEIDER NNP
REORGANIZE VB
PROFESSORS NNS NNP
NONBUSINESS NN
DAVIS NNP
OPERA NNP NN
HELLER\/BREENE NNP
ANHEUSER NNP
KONG-BASED JJ
OPERE NNP
STUDIO-CITY NNP
DERIVE VB
OUSTER NN
807.5 CD
XIDEX NNP
807.6 CD
BROBERG NNP
SPACE-AGE JJ
TURBO-CHARGED JJ
PROBABLE JJ NNP
EXPANSIONS NNS
INSTITUTE NNP NN VB
PETITE JJ
LOOKOUT NN
KELTON NNP
EAGLETON NNP
NATIONALISTIC JJ
DARTBOARD NN
INSTITUTO NNP
QUIST NNP
FRANCHISERS NNS
PROBABLY RB
MICROVAN NN
MILLLION NN
DO-OR-DIE JJ
CATCHING VBG
OLGA NNP
EXIT-LOAD JJ
QUITE RB PDT JJ
CORROSION-RESISTANT JJ
FH-77B NNP
ENHANCE VB
BAUMAN NNP
QUITS VBZ
HEMPEL NNP
OASES NNS
DISOBEDIENCE NN
CORRESPOND VB
DO-IT-YOURSELF JJ
HDTVS NNS
SCALE-DOWN JJ
21-YEAR-OLD JJ
PRATER NNP
LESS-AMBITIOUS JJR
SACKINGS NNS
TORTUOUS JJ
HUSTINGS NN
ORIGINAL-INSTRUMENT JJ
TOWNSHIP NN NNP
PERKINELMER NNP
REFINERS NNS
REBUKED VBD
ISALY NNP
REFINERY NN NNP
HERSHHENSON NNP
LEAVING VBG NN
REFORMULATED VBN
SECURITIES-LAW NN
GARDEN NN NNP VB
OLIN NNP
STENGEL NNP
34-FLOOR JJ
2,822,000 CD
ANTI-FOREIGNER NN
PORTEND VB
PATTERSON NNP
WOMANIZING VBG
PROSTITUTION NN
SHOULDER NN VB VBP
RECANTED VBD VBN
KERKORIAN NNP
NEBRASKA NNP
FREE-STANDING JJ
DAVIS\/ZWEIG NNP
GALICIA NNP
MORNINGS NNS
FINNERTY NNP
DEPOTS NNS
PACKAGED VBN
FREQUENCY NN
ALLEGATIONS NNS
BENDING VBG
DIFFICULT JJ
TALCOTT NNP
CONSUMMATE JJ
PACKAGES NNS VBZ
525,546 CD
ROUND NN VB JJ VBP NNP
657.517 CD
GABELLI NNP
QUANTIFY VB
PAYMENTS NNS
SARDONIC JJ
LOOSELEAF NN
ILLNESS NN
1304.23 CD
CASINO NN NNP
LIMIT NN VB VBP NNP
OASIS NN NNP
GRAMMAR NN
INSULATED VBN
RANKING JJ NN VBG
SPACED NNP
ALLOUT JJ
REINSURERS NNS
ISLANDER NNP
AMBITIOUSLY RB
UNWINDING VBG
PERFUME NN
ENDORSED VBD VBN
313.2 CD
SHORTCHANGED VBN
DOMINOES NN
SPACES NNS
ENDORSES VBZ
CAUCUS NNP
HALSTED NNP
BETWEN NN
EXTEND VB VBP
ABRAHAM NNP
GAECHINGER NNP
HINTON NNP
MONEY-MANAGEMENT NN JJ
SUBARU NNP
MOLDED VBN
SERVANTS NNS
PROSTITUTES NNS
I-880 NN NNP
SOUTHWEST NNP NN JJ JJS RB
DECONSTRUCTED JJ
EXTENT NN
ENTITLEMENTS NNS
TAKEOUT NN
TEXTILE NN JJ NNP
KUSHNICK NNP
SELDOM RB
EXCELLENT JJ
487.8 CD
FLICK NN
PIGNATELLI NNP
STEREOTYPICALLY RB
TURNPIKE NNP
ALLOWS VBZ
CARELESS JJ
DARLINGS NNS
FLAGRANTE FW
CYRUS NNP
BI-POLAR JJ
TITANATE NN
MULTI-FAMILY JJ
RENEGOTIATED VBN
KENDALL NNP
PURITANICAL JJ
233.6 CD
SOCCER NN
2618.03 CD
BESTIARY NN
BHABANI NNP
METROMEDIA-ITT NNP
2642.64 CD
BORINGLY RB
ASTONISHING JJ
FUND-RESEARCH JJ
POST-ELECTORAL JJ
OLOF NNP
DEBTHOLDERS NNS
AUDIENCES NNS
KEIZAIKAI NNP
IMSAI NNP
TIPTOE VB
LEAVITT NNP
DICTATOR NN
PREGNANT JJ
COUNTERACTED VBN
FLIED VBD
MUMBLED VBN
BRIDGING VBG
FLICKING VBG
SINGLE-B-MINUS JJ NN
SICHUAN NNP
ELEPHANT NN
FLIER NN
FLIES VBZ NNS
HUARD NNP
ALLOYS NNS
CHOOSES VBZ
WILCOX NNP
SPORTDOM NN
153.3 CD
153.9 CD
OIL-PRICE NN
SHOOTOUT NN
LAW-MAKING NNS
TEFLON NNP
BONNELL NNP
2642.88 CD
CO-WORKERS NNS
CERTIFICATE-OF-NEED NN
ROUTE NN NNP
SIDESTEPS VBZ
MARGIE NNP
KOFY-FM NNP
ARTRA NNP
CONSPICUOUS JJ
PRAY-FOR-GROWTH-LATER JJ
MARGIN NN JJ
INACCURATE JJ
SUBCONSCIOUS NN
RUDER NNP
FIVE-HOME-RUN JJ
COLLEGE-EDUCATED JJ
EDITORIAL-PAGE NN JJ
CHANTILLY NNP
NOSE-DIVE NN
COIN-OPERATED JJ
DISNEY NNP
CLINCHING VBG
ASSIMILATED JJ
MARGINS NNS NNP
ROMANEE-CONTI NNP
STEINKUEHLER NNP
2237.8 CD
RHINE-WESTPHALIA NNP
DEALER-TO-DEALER JJ
FATHER NN NNP
MARTINSVILLE NNP
FAKED VBD VBN
STRUCK VBD VBN
LUCISANO NNP
PEROZO NNP
SNAPPING VBG
CORMACK NNP
COMPUTERS NNS NNP NNPS
DEPOSITARY JJ NN NNP NN|JJ
EDIBLE JJ
CAPOTEN NNP
CONVERSELY RB
MARGINAL JJ
UNLOADED JJ VBN
TRICKERY NN
TEACHERS NNS NNPS
ARTSY JJ
IFINT NNP
NAUSEA NN
FUMES NNS VBZ
486TM NN
13,120 CD
FAMILY-PLANNING JJ NN
57,000 CD
ENDINGS NNS
CURIOUS JJ
PAPERMILS NNP
FERRIER NNP
HONECKER NNP
DOORSTEP NN
FERRIES NNS
SCARCE JJ
100-SHARE JJ NNP
CASTROL NNP
THICK-WALLED JJ
BOLSHEVIKS NNPS
IMMUNE-SYSTEM NN
GRAZERS NNS
RABIA NNP
DISARRAY NN
ALZHEIMER NNP
RABID JJ
COWARDLY JJ
HUNDREDTH JJ
BEARS-CLEVELAND NNP
65,200 CD
OVERREACTING VBG
ADEQUATE JJ
RABIN NNP
PLYWOOD NN
INVADING VBG
KERLONE NNP
MYUNG NNP
REAPED VBN VBD
POWERHOUSE NN
KEYBOARD NN
SOVEREIGN JJ
200-300 CD
ADAGE NN
CONTRIBUTIONS NNS
MICROSCOPE NN
FIVE-DAY JJ
ANGUISHED JJ
HAMPERING VBG
GREENBACK NN NNP
HOSES NNS VBZ
MESON NNP
TROPICS NNPS
GAELIC JJ
12.125 CD
HARTMAN NNP
INDEPENDENT-MINDED JJ
OVERREACTION NN
10\/32 CD
BRUCKHEIMER NNP
GENTLER JJR
STATE-DIRECTED JJ
SCARED VBN JJ VBD RB
CRIER NNP
BLUNDERED VBD
CRIES VBZ
SAAB NNP
SURPASSED VBD VBN
SEASONINGS NNS
CO-DEFENDANTS NNS
TUCSON NNP
DISEASE NN NNP
SCARES VBZ NNS
INSULATOR NN
139.8 CD
PRODUCER-PRICE JJ NNP
MORTALITY NN
MARGINED VBN
HARRITON NNP
CUSTOMER-DRIVEN JJ
FOREIGN-TRADE JJ
MOLDING NN
APPLIANCE-CONTROLS NN
CRAY-3 NNP CD
POINTE NNP
BRUYETTE NNP
DISCRETION NN
TRANSFERRING VBG
MACKINAC NNP
VITZHUM NNP
RUSSIANS NNPS
DECERTIFIED VBN
MEDIATION NNP NN
SAPPED VBN
POINTS NNS VBZ NNPS
INVESTMENT-HOUSE NN
GILLESPIE NNP
KLEIBER NNP
QUASI-XENOPHOBIC JJ
EQUATION NN
124,875 CD
MUSSORGSKY NNP
TREATED VBN VBD
COMPARTMENT NN
KINGSIDE NN
SNECMA NNP
INSISTING VBG
DRISCOLL NNP
KUMAGAI-GUMI NNP
AUDACIOUS JJ
OS\/2 NNP
MRS. NNP
SACK NN
FARNEY NNP
CORN-BUYING JJ
FLING NN
SCAVENGERS NNS
DISCOURSE NN
SUPERDOT NNP
TASTELESS JJ
MESSA FW
BONNETS NNS
SUBSTANCES NNS
FLINT NNP
ASTONISHMENT NN
QUANTITY NN
DIVERSIONARY JJ
FETUSES NNS
SECURITIES-PRICE JJ
KIMIHIDE NNP
PUBLICLY RB
CHRISTY NNP
BROAD JJ NNP
MACARONI NNP
BLUMENTHAL NNP
86.2 CD
WARHEADS NNS
86.3 CD
86.4 CD
STERILIZATION NN
FAMILIA NNP
COMPUTER-DEPENDENT JJ
HIGH-BALANCE JJ
ARTZT NNP
RAYDIOLA NNP
RODGERS NNP
DRESSMAKING NN
SMELTER NN
ELECTROSURGERY NNP
TORRENCE NNP
SONATA NNP NN
DISLIKED JJ
RATNER NNP
20-HOUR JJ
THANKSGIVING NNP
BIKER NN
BIKES NNS
TRIPLE-B-PLUS JJ
UTTER JJ NNP
DISLIKES VBZ NN
OVER-ALLOTMENT JJ NN
ENRICH VBP
FREQUENTS VBZ
FLIPS VBZ
SAFE JJ NNP NN
RUSHING VBG
6,727,042 CD
USHERING VBG
RHODODENDRON NN
ADAMS NNP
TRAUMATIC JJ
20.375 CD
ORTHODOXY NN
AUTO-SAFETY JJ
SETTLERS NNS
VIEWPOINTS NNS
KRYPTONITE NN
DISASTER-ASSISTANCE JJ
SAGA NN
SAGE NN
I.E.P. NNP
SAGO NNP
DOSSIERS NNS
PANAM NNP
RECEIVABLE NN JJ
SPACE-SCIENCE NN
470.67 CD
DRAMATICALLY RB
ROEDERER NNP
BRODY NNP
INJUNCTION NN
CALIFORNIA-BASED JJ
INDUSTRIALE NNP
INDUSTRIALI NNP
PLAINES NNP
NOSE-DIVED VBD VBN
CRIME NN NNP
INDUSTRIALS NNS VBZ NNP NNPS
LAVERY NNP
KUDLOW NNP
REVENUE-SHORT JJ
DELETED VBN
THUMBS-DOWN NN
381,000 CD
WEISBERG NNP
THREATEN VB VBP
CRIMP VB
CURRENT-ACCOUNT JJ
PREDICTS VBZ
FLIGHT NN NNP
VARYING VBG JJ
SAID VBD VBN NNP
SOWETO NNP
RELINQUISHING VBG
AMSTEL NNP
MACFARLANE NNP
ADAPT VB VBP
KEMPINSKI NNP
SAIN NNP
SUPPRESSED VBN VBD
CATHETER NN
COMPACTED JJ VBN
IMMORAL JJ
470.80 CD
FLIM-FLAM NN
POUCHES NNS
CLOROX NNP
DOUBLEDAY NNP
FIVE-INCH JJ
FUTILITY NN
EDELSTEIN NNP
LABELING VBG
MANSKE NNP
GILLIAN NNP
ORTEGA NNP
CIERA NNP
FIAT NNP NN
PANDA NNP NN
NESBIT NNP
AMEND VB
ALDOMET NNP
DEVIATED VBD
POLITICS NNS NN NNP NNPS
VERNITRON NNP
DRYNESS NN
FITNESS-PROMOTING JJ
IMMUNE JJ NNP
1.6143 CD
1.6145 CD
HARKINS NNP
RIVERFRONT NN
438.15 CD
COACHES NNS
ASCENDENCY NN
SAKE NN
IMPORTED VBN JJ VBD NNP VBN|JJ
HYPERACTIVE JJ
QUANTITIES NNS
EXCEEDING VBG
DEARBORN NNP
BUCKED VBD VBN
PANEL NN
BROADCASTING NNP NN VBG
IMPORTER NN
250-BRANCH JJ
SAKS NNP
SQUALID JJ
ZURICH NNP
LIPSTICKS NNS
CLOSET-SIZED JJ
UNADJUSTED JJ
CREDITBANK NNP
HERSHEY NNP
RESPECTIVE JJ
462.89 CD
WORLDS NNS NNPS
EMERYVILLE NNP
BUCKET NN
26-WEEK JJ
HIRING VBG NN
SALA NNP
822.8 CD
OVERTURNING VBG
SALE NN NNP
SEEKING VBG
MERCHANDISED VBN
SALK NNP
GAULOISES NNP NNPS
INDIGNITY NN
MORTGAGE-INTEREST JJ
200-LAWYER NN
SALT NNP NN
RAPIDLY RB
SHRONTZ NNP
FIDE JJ
462.98 CD
HELMSLEYSPEAR NNP
CAMPAIGNING NN VBG
STOCK-QUOTE JJ
FAKTY NNP
FRIENDSHIPS NNS
CLEANSERS NNS
DENVER NNP
NATIONAL-PRIORITY JJ
GHOST NN
SAME JJ
LAW-ENFORCEMENT NN JJ
MERKSAMER NNP
DESTABILIZING JJ VBG
ARUBA NNP
OMAN NNP
ESPLANADE NNP
GOBLINS NNS
ILL-ADVISED JJ
OMAR NNP
JOHAN NNP
AUDIO-VISUAL JJ
UNDOING NN
SUBVERTED VBN
446.62 CD
VETERAN NN JJ
BALKING VBG
PANGS NNS
454.86 CD
BARBECUE NN
BANDED VBN
NEPTUNE NNP
SELECT VB JJ NNP VBP
UNICORP NNP
DELICATELY RB
DESCRIPTION NN
SAND NN NNP
SANG VBD
AMBIGUITY NN
MANSON NNP
SANK VBD
ROVER NNP
LOURIE NNP
SANN NNP
BREAKDOWNS NNS
HANGAR NN
BROKE VBD JJ RB
SANS FW
DEMOLISH VB
DISCOUNT-RETAILING NN
RINGERS NNS NNP
PISTOL NN
OPENING-HOUR JJ
DECEDENT NN
PISTON NN
ACTIVE-MATRIX NN JJ
GRAMMYS NNS
LESSERS NNS
INQUIRED VBD
CRISP JJ NNP
MEDDLING VBG NN
AMPHOBILES NNS
SQUALLS NNS
GREAT-GRANDFATHER NN
ORIGIN NN
OBEISANCE NN
SYNTHESIS NN
PANIC NN VB
SELF-STYLED JJ
FLAT-OUT JJ
MISSIONARY JJ
SIGNIFICANT JJ
HUBEL NNP
HOSTS NNS VBZ
SNIGGERINGLY RB
PREPARED VBN JJ VBD
TURTLES NNPS NNS
ANTI-BALLISTIC-MISSILE JJ
HUBER NNP
GOVERNMENT-APPOINTED JJ
PLAINLY RB
STATE-COURT NN
NORFOLK NNP
INTOXICATED JJ
142,117 CD
SINGLE-LOT JJ
99.555 CD
DOAK NNP
MAILROOM NN
PREPARER NN
PREPARES VBZ
GARDNER NNP
SKIING NN VBG
GAS-TAX-INCREASING JJ
PUPIL NN
140-POINT JJ
APPROPRIATELY RB
DIAGHILEV NNP
EMBARK VB
LIFESAVERS NNPS NNP
FENCES NNS
ESSELTE NNP
TWANGY JJ
13-NATION JJ
63.875 CD
186,000 CD
NEWSPRINTS NNS
KOENIG NNP
ESTRANGED VBN
DOBI NNP
UNFASHIONABLE JJ
PETITIONS NNS
BI-MONTHLY JJ
E.C. NNP
ASSIDUOUSLY RB
INTERPRETED VBN VBD
11,141,711 CD
LONG-RANGE JJ
FUELING VBG NN
CURIOSITY NN
RESHAPED VBN VBD
TIME-CONSUMING JJ
OMEN NN
IN-OFFICE JJ
NUGENT NNP
CLASSROOM NN NNP
INTERPRETER NN
INTERNATIONALIZATION NN
FOLKSY JJ
SCOWCROFT NNP
CAMPEAU NNP NN
FEINMAN NNP
808.3 CD
10.5625 CD
DOCK NN
COMPETITIVENESS NN
JUGGLERS NNS
582.6 CD
RESCHEDULE VB
SQUALOR NN
SARA NNP
WILDER NNP
HANGED VBN
LINDA NNP
BRONX NNP
BALLPARK NN
OVERLEVERAGED JJ
CONFIGURATIONS NNS
DIFFERENTIAL NN JJ
DISTRIBUTORSHIP NN
COMDISCO NNP
SARK NNP
RELOCATED VBD VBN
TWO-PRONGED JJ
MOLECULE NN
DEWHURST NNP
NEUROSCIENCES NNP
BROOD NN
BUCKLE VB NN
DODD NNP
NONRECURRING VBG JJ
BROOK NNP
ALARMS NNS VBZ
ANIMATION NN
ATOMS NNS
E.E. NNP
AUTO-INDUSTRY NN
MUSLIMS NNPS
UNAFFILIATED JJ
LINED VBN VBD
ISC\/BUNKER NNP
METAL NN NNP
LINEN NN
KONOWITCH NNP
RAMBLED VBD
ATONE VB
UP-OR-DOWN JJ
PARALYSIS NN
NORTHWARD RB
LINER NN
SASS NNP
LINES NNS NNPS NNP
41.18 CD
BIRTHPLACE NN
728.5 CD
JUDICIARY NNP NN
ENGRAPH NNP
SYSTEM NN NNP
CERTIN NN
SUPPRESSOR NN
FIELD-CROP-SEEDS JJ
728.8 CD
E.F. NNP
GREENER JJR
315.12 CD
DOES VBZ NNP
BOYCOTTED VBN
INTERNATONAL NNP
30-A-SHARE JJ
AFL-CIO NNP
THANKED VBD
NON-TOXIC JJ
FILE VB NN VBP
ARMIES NNS
DESCRIPTIVE JJ
GESTURED VBD
DOWNSTREAM JJ
TRAITOR NN
HIGH-SECURITY JJ
PANNY NNP
FILL VB VBP NN
SQUABBLING NN
FILM NN NNP
LIFTING NN VBG
EMERGING VBG NNP JJ
RACEHORSES NNS
INSANITY NN
JEPSON NNP
2,600,000 CD
MINIKES NNP
GESTURES NNS
SAUL NNP
AVIVA NNP
OMIT VB VBP
LINGO NN
38.875 CD
MIKHAIL NNP
AGROCHEMICAL NN
648.2 CD
HAWKER NNP
VERIFICATION NN
BROS. NNP NNPS
PICASSOS NNPS
APPLESEEDS NNPS
PASSIVITY NN
DOGS NNS NNP VBZ
MAIDEN JJ NN
SAVE VB VBP NNP IN
FINANCE NN VB NNP
25.01 CD
BRIGHTER JJR
LUDCKE NNP
AL-SEYASSAH NNP
33.25 CD
188.84 CD
AGRARIAN-REFORM JJ
ASSAULT NN VBP
DAWNS VBZ
FINA NNP
FINANCO NNP
BOTTOMED VBN VBD
188.89 CD
FIND VB VBP
FRONTIERES FW
INTERCONTINENTAL NNP
FINE NN JJ NNP VB RB NNPS
LORAZAPAM NN
POKING VBG
MUNDANE JJ
FINK NNP
CHLORIDE NN
FINN NNP
METED VBN
MIKLOS NNP
MONEY-MANAGER NN
COWBOYS-OWNED JJ
MATURED VBN
REFERRAL NN
BOOKED VBN VBD
ARBITRAGERS NNS
ANYTIME RB
25.12 CD
FLASHPOINT NN
METER NN
SPY-CHASER NN
30,000 CD
BROTH NN
GAGGED VBN
LASER-READ JJ
MATURES VBZ
LAMBDA NNP
BOOKER NNP
SITTING VBG VBG|JJ
CARDBOARD NN
RESTRICTS VBZ
ANTI-ANEMIA NN
BUCK NN NNP VB VBP
TAX-RATE JJ NN
INVESTMENT-NEWSLETTER NN
EZEKIEL NNP
17.01 CD
MEADOR NNP
41.60 CD
CHAUFFEUR NN VB
SWELLS VBZ NNS
BANDOW NNP
ZWELAKHE NNP
COMPRISING VBG
314.6 CD
25.25 CD
17.06 CD
GREENSHIELDS NNP
SUMATRA NNP
PROGRESSED VBD VBN
CONGRATULATORY JJ
ADMINISTRATION-FED JJ
BUOYANT JJ
ELVIRA NNP
RACAL NNP
INCENSED JJ VBN
INACTIVATION NN
9.875 CD
PROGRESSES VBZ
FATHERS NNS
BUDS NNS
DEPRESSIONS NNS
323.85 CD
TOASTED VBD
ANTACID NN
WILDLY RB
MISCALCULATION NN
LAURELS NNS
17.12 CD
TRAINING NN VBG
PIERRE-KARL NNP
LIMPID JJ
41.75 CD
41.76 CD
17.19 CD
SAYS VBZ
LINKS NNS VBZ NN NNP
TOASTER NN
HALF-AN-HOUR NN
TAPESTRIES NNS
588,350,000 CD
ROOF-CRUSH JJ
POINTING VBG
ACCIDENTALLY RB
VINTAGE JJ NN
LOWER-VOLUME JJ
CONDUCT NN VB VBP NNP
ENVELOPES NNS
OMNI NNP
HURRIED JJ VBN
CROSS-BRED VBD
COMMOTION NN
17.20 CD
EQUIPMENT NN NNP
BODMER NNP
DETECT VB VBP
234.3 CD
234.4 CD
HOME-SALE JJ
234.5 CD
DIVERGENCE NN
WHITEWASHED VBN
17.25 CD
CANNELL NNP
ARDENT JJ NNP
JOHNS NNP
HURRIES VBZ
DOLE NNP VBP VB
PANTS NNS
FIRE NN NNP VB
STUDENT NN NNP
BROWN NNP JJ
REALIGNMENTS NNS
DOLL NN
RACHMANINOFF NNP
RUBLES NNS
PRECAUTIONS NNS
1,000 CD
1,001 CD
E.M. NNP
FIRM NN JJ VB NNP
FOOLING NN VBG
REFERRED VBD VBN
PORTRAYING VBG
DEL.-BASED JJ
ROADBED NN
MANSFIELD NNP
DOLT NN
FERTILIZERS NNS
RESTLESS JJ
MINTING VBG
INTERVENTIONS NNS
TOKAI NNP
DISTRICTS\/STATES NNS
SUB-UNDERWRITING VBG
CLOSE-KNIT JJ
25.50 CD
25.51 CD
LAURENT NNP
ASKING VBG NN JJ
33.75 CD
2-TO-1 JJ
17.37 CD
FEBRUARY NNP
NAZER NNP
17.39 CD
BOOKIN NNP
TOKYO-BASED JJ
DOME NNP NN
SHANYUN NNP
NONRESIDENT JJ
QUANTITIVE JJ
FISH NN RB
MARXIST-DOMINATED JJ
ODD-SOUNDING JJ
3436.58 CD
PERSONAL-CARE JJ NN
1,010 CD
ARCHAEOLOGICAL JJ
1,012 CD
1,013 CD
BUGS NNS NNP
1,014 CD
1,015 CD
FIST RB NN
CHRISTIANS NNS
CHECKOFF NN NNP
DOLLEDUP JJ
154.2 CD
CONFEREES NNS
C-YIELDS NNS
154.3 CD
10-STORE JJ
RACED VBD
17.47 CD
DONA NNP
SPACKLE VB
ROCKWELL NNP
WHALER NNP
WHALES NNS
MUSHROOM-PROCESSING JJ
FALCO NNP
DONE VBN RB
FILENET NNP
DONG NNP
LEANED VBD VBN
GUERIN NNP
CONDESCENSION NN
RACES NNS
GRAPPLED VBD
UNNECESSARY JJ
COLLINS NNP
DONS VBZ NNS
1,027 CD
FITS VBZ NNS
LIMPLY RB
LEANER JJR RBR
FLASHED VBD VBN
INSECTS NNS
BREWED VBN
17.50 CD
ELECTRONICS NNS NNP NN NNPS
POST-WAR JJ
33.90 CD
ARMING NN
GRAPPLES VBZ
HOLDUPS NNS
AUSTRALIAN-AMERICAN JJ
BRAGGING NN
PETERSBURG NNP
25.78 CD
DICARA NNP
BRIGHTLY RB
FLASHES NNS VBZ
BREWER NN
VERSUS CC IN FW
INFOTECHNOLOGY NNP
OUTINGS NNS
UNDERGIRDED VBD
DOOM VB NN
RESHUFFLINGS NNS
1,030 CD
DOOR NN NNP
75-DAY JJ
CONTROLLERS NNS
AMFAC NNP
960,000 CD
17.64 CD
FUNDS NNS NNPS NNP VBZ
WILDERNESS NN
DOPE NN
WORK-IN-PROGRESS NN
FIVE CD
LONG-TIME JJ
DEVELOPING VBG JJ NN
EXETER NNP
LATOWSKI NNP
SEQUEL NN
81.125 CD
DELAY NN VB NNP VBP
WASHING VBG NN
1,040 CD
THANH NNP
FELINE JJ
0.025 CD
THANK VB VBP
PRAGMATIC JJ
TOUBRO NNP
BRIKSA NNP
17.70 CD
ENVISIONS VBZ
17.73 CD
TOKEN JJ
WELL-INTENTIONED JJ
BIENNIAL JJ
RIGUEUR FW
RESURFACED VBD VBN
25.96 CD
NAZIS NNPS NNS
CONFRONTING VBG
MCALPINE NNP
DAUGHERTY NNP
CASH-DEFERRED JJ
NOT-SO-SUBTLY RB
1,050 CD
56,565,000 CD
E.R. NNP
TOOTAL NNP
FOOLISH JJ
20-TO-30-MILE JJ
CONDUIT NN
CLOSED VBD VBN JJ VBN|VBD NNP
LATE-SUMMER\/EARLY-FALL JJ
AFRICAN-AMERICAN JJ
COLUMNS NNS
DEALERSHIP NN
SLIDER NNP
ENLARGERS NNS
SLIDES NNS VBZ
DIETING NN
PRECLEARANCE NN
BULB NN
DELCO NNP
CLOSER RBR JJR RB
CLOSES VBZ NNS
PERSPECTIVE NNP NN
CLOSET NN
SOULED JJ
INORDINATE JJ
FIELDED VBD VBN
BULK NN JJ
BULL NNP NN
KEYNES NNP
INFERNO NN
CHLORINE NN
1,062 CD
FELIPE NNP
CREDIT-SOFTENING NN
SPANISH JJ NNP
PILLARS NNS
A.K.A. JJ
LAND-USE NN
FUNGI NNS
HOTEL NN NNP
FIXX NNP
17.92 CD
ACCOUNTABLE JJ
17.95 CD
17.97 CD
200.70 CD
REUSED VBN
LAWSUIT NN
THRUST NN VBD VBN
CRUTZEN NNP
DOSE NN
FEDERAL-COURT JJ
FLAT-TO-LOWER JJ
13,249 CD
VAGARIES NNS
IMMENSELY RB
BUMP VB NN
BUMS NNS
HATHAWAY NNP
SURRENDERING VBG
1,074 CD
RAIL-TRANSIT NN
ARKOMA NNP
DELEGATE NN VB NNP
PICKERING NNP
ONE-ACTER JJ
EXORCISE VB
COLLEAGUES NNS
GOSBANK NNP
STATISTICAL JJ NNP
SUBMARINE NN JJ
MONTH-TO-MONTH JJ
BUND NN
CAROLINA NNP
EXORCISM NN
CAMPERS NNS
CAROLINE NNP
TIMOTHY NNP
DOTH VBZ
SCOOTED VBD
EXORCIST NN
SZOCS NNP
RACKS NNS
CONFORM VB VBP
BUNS NNS
BUNT NN
1,087 CD
SHIRT-POCKET NN
1992-1999 CD
SCOOTER NN
THARP NNP
SCHLEMMER NNP
SQUEAKY RB
INFLATION\/DEFLATION NN
TEODORANI NNP
TOKIO NNP
PROMOTED VBN VBD
MISANTHROPE NN
WORTHLESS JJ
LINUS NNP
MISUBISHI NNP
TOOTED VBD
DOUG NNP
CIRCULATIONS NNP NNS
AUCTION NN VB
FEROCIOUSLY RB
KYLE NNP
COMMUNICATE VB
PROMOTER NN
PROMOTES VBZ
CHILD-PARENT JJ
BUOY VB
RELEASE NN VB NNP VBP
SAIGON NNP
METRO NN NNP
FINANCIAL-DATA JJ
DOVE NN VBD
LAUGHING VBG JJ
OMNIBANK NNP
NON-DISCHARGABLE JJ
NICER JJR
LOCKED VBN JJ VBD
87-7 CD
TACOMA NNP
MIDDLETOWN NNP
DEFLECT VB
E.W. NNP
CLARIFICATION NN
STRAIGHTFORWARD JJ
MISLEADING JJ VBG
EX-IM NNP
LOCKER NNP
EIDSMO NNP
RECKON VB VBP
BAKEWARE NN
ANSWERS NNS VBZ
DELHI NNP
PERSONALLY RB
FINISHED VBD VBN JJ VB
BLAINE NNP
SQUADRON NN
WRONG JJ RB NN
FUNKY JJ
87.1 CD
OZONEDEPLETION NN
87.2 CD
87.4 CD
87.5 CD
FALLS VBZ NNP NNS NNPS
87.7 CD
BLOWTORCH NN
COMMUNITY-DEVELOPMENT NN
87.9 CD
DOWN RB IN RP JJ NNP NN VBP IN|RB RBR
FINISHES VBZ NNS
LENGTHENED VBN VBD
MIDVALE NNP
PAVING-EQUIPMENT NN
CONVENTIONERS NNS
EDGING VBG
FOREIGN-INVESTOR NN
B.A.T NNP NN
382-37 CD
BURK NNP
CREDIBILITY NN
PHASED VBN VBD
OUTPACED VBD VBP VBN
PECKS NNS
EARNINGS NNS NN
BURN VB VBP
COHERENT JJ NNP
TALSKY NNP
BURR NNP
BURT NNP
SHOWING VBG NN
PERFORMANCE-RELATED JJ
BURY VBP VB
PHASES NNS
UNDETECTED JJ
PROGRAMMATIC JJ
NICHE NN
FIVE-MONTH-OLD JJ
TOURNAMENT NN
FANCIEST JJS
RENEGOTIATING VBG
BUSH NNP
DOCUMENTS NNS VBZ
GOODFELLOW NNP
SERIALS NNS
POSTAGE NN
PERISHED VBN
COMMUNIQUES NNS
CRACKDOWN NN
92-14 CD
BUST NN
EPIDEMIOLOGIST NN
MISREPRESENTING VBG
GUARANA NNP
SIDHPUR NNP
TRITON NNP
BUSY JJ
16-YEAR-OLDS NNS
ENJOY VB VBP
REPELLENT JJ
PRESSING VBG JJ
UNUSUAL JJ
FUNNY JJ NNP
HOTLY RB
COLON-CANCER NN
STARTED VBD VBN
RENEGOTIATION NN
29\/32 CD
AITKEN NNP
BUTT NN VB
DELLA NNP
EGG-INDUSTRY NN
STARTER NN JJ
BUTZ NNP
RAVINE NNP
OPTIONAL JJ
TOKOI NNP
DETERS VBZ
FIXED-RATE JJ
DETECTIVE-STORY NN
PRIMITIVES NNS
MODERNIST NN JJ
TRADERS NNS NNP
GUIGAL NNP
DINKIEST JJS
SNIFFED VBD
SLAVISHLY RB
NETWORK-WIDE JJ
WEDDING NN
APPEARANCES NNS
INACCURATELY RB
DISRUPTIONS NNS
HORTICULTURE NN
SALINAS NNP
LITIGATOR NN
CHANDELIER NN
BAJAKIAN NNP
ARROGANCE NN
KITTY NN
RESTRICTED-ENTRY JJ
DENOMINATIONS NNS
CEMENT NN VB NNP
ACCENTS NNS
GYMNASTICS NNS
REOPENING VBG
INTRIGUE NN
AUSTRIAN JJ NNP
34-PAGE JJ
WROTE VBD
WINSTON NNP
CHECKOUT NN
EXCEPTIONAL JJ
ENGLER NNP
GLOOMIER RBR JJR
CHEETHAM NNP
CRIMINAL-LAW NN
DILORETO NNP
DORNAN NNP
DEFECTIONS NNS
FAR-RIGHT JJ
FALSE JJ
NIPSCO NNP
DECREED VBN
CONT'D. VBN
HONORARY JJ
PROVISIONAL JJ
FACILITATE VB VBP
HORRIBLE JJ
PEJORATIVE JJ
UTTERANCES NNS
TUBULAR JJ
DRAPES NNS
MUTINOUS JJ
EARLE NNP
BREEZES NNS
WORKINGS NNS
BILLS NNS NNPS VBZ
UNTOUCHABLE JJ
DESPAIRS VBZ
WHIMPER NN
BILLY NNP
99.625 CD
EARLY JJ RB NNP
RANDALL NNP
HIPPIE NN NNP
BLINDER NNP
EXCISION NN
BUYS VBZ NNS
AIRED VBD VBN
BEFELL VBD
BOTTOM-LINE JJ
CONSIDERABLE JJ
1,826,596 CD
VARIOUSLY RB
HARDWARE NN NNP
TURGID JJ
FOLLOW VB VBP
MACHINISTS NNS NNPS NNP NNS|NNPS
134,000 CD
ROWDY JJ
SEMIFINISHED VBN
SHORT-COVERING NN
TRAFICANT NNP
CONSIDERABLY RB
WELL-EDUCATED JJ
ROWED VBD
PLAGUED VBN VBD
743.7 CD
INACCESSIBLE JJ
CAREFULLY RB
UNNOTICED JJ
DISCONNECT VB
BUZZ NN VB JJ
FOUR-FIFTHS NNS
OFF-LINE JJ
WENDLER NNP
TOKUO NNP
ACCEDE VB
FINANCIAL-SERVICES NNS JJ
35374.22 CD
THIEVES NNS
APPRECIABLE JJ
EARNS VBZ
MARGIN-CALLS NNS
SYNTHETIC JJ NN
DIRECT-MAIL-MOGUL NN
ENLIGHTEN VB
RAVITZ NNP
MILWAUKEE NNP
ONCE RB IN
DAUGHTERS NNS
KOTOBUKI NNP
NONETHELESS RB
SPIRALING VBG JJ
POLLUTED JJ
APPRECIABLY RB
GO-AROUND NN
MODERNIZE VB
THIRDS NNS
PSYCHIC JJ
METSCHAN NNP
SONY-OWNED JJ
L987 CD
COLOMBIAN JJ
L988 CD
HARASSMENT NN
BULLISHLY RB
NON-AIRLINE JJ
ASPIRING JJ VBG
PEPPERS NNS
3-FOR-1 JJ
3-FOR-2 JJ
FENDED VBD
3-FOR-3 JJ
GLEAN VB
DELTA NNP NN JJ
ALASKA NNP
GALBRAITH NNP
COLOR-TELEVISION NN
SQUADS NNS
FENDER NN
TELEPHONE-INFORMATION NN
PERSONA NN
99.661 CD
OLSEN NNP
PELADEAU NNP
PERSONS NNS
CHOREOGRAPHY NN
UNSEEN JJ
SERIOUSLY RB
OFFENDING VBG
ONES NNS
BIFURCATE VB
MIXERS NNS
MIDSIZED JJ VBN
DISQUALIFY VB
517,500 CD
GOVERNMENT-BUSINESS NN
99.672 CD
MARRIED JJ VBN VBD NNP
DEVILLE NNP
DISINCLINED JJ VBN
ART-AUCTION NN
BONANZA NN NNP
LAMENTED VBD
MATLOCK NNP
MONOHULL NN
PROSTATE NN
CONTENDED VBD VBN
109,000 CD
TOKYO NNP
VIYELLA NNP
CHAUVINISM NN
CHANNEL NNP NN VB VBP
ADVISORIES NNS
SNAPPY JJ
TOKYU NNP
PRAVDA NNP
SAVVIER JJR
CONTENDER NN
34996.08 CD
CAPABLE JJ
MYSTERY\/COMEDY NN
ENERGY NN NNP
SIDESTEPPING VBG
PROTEINS NNS NNPS VBZ
HANDSOMELY RB
DEBT-BURDENED JJ
99.691 CD
EXCEPTIONALLY RB
BALKED VBD
MANTUA NNP
COTRAN NNP
SLOTNICK NNP
VACATIONS NNS NNPS
PROVISION NN
OUTWARDLY RB
ANGERING VBG
EVENING NN NNP
LOCKUP NN
BLINDLY RB
EARTH NNP NN
VACILLATION NN
SWEDISH JJ NNP
FURNACES NNS
GOVERMENT NN
DECEIVED VBD VBN
LESS-ADVANCED JJ|JJR
LAUGHED VBD VBN
TWO-TIER JJ
SITTER NN
FORECLOSURES NNS
PANDEMONIUM NN
AFGHANISTAN NNP
MICROPHONES NNS
9.934 CD
TOUCHE NNP
FRIVOLOUS JJ
WHOOPING JJ VBG
SYMPATHETIC JJ
INTERHOME NNP
ENCOURAGEMENT NN
SALOOJEE NNP
INEXCUSABLE JJ
HANOVER NNP
PAWNING VBG
GOOD-BYE NN
MARIAM NNP
MARIAN NNP
TOUCHY JJ
SAME-STORE JJ CD
DREAD NN
THROATS NNS
REALIZING VBG
DREAM NN VBP VB
FUJITSU NNP
HAWLEY NNP
MISHANDLING VBG
GUIDE NN VB NNP
SPAWNED VBN VBD
NAGANO NNP
END-TAILED VBN
MARKEDLY RB
DEAL-MAKING NN
TWICE-DAILY JJ
MANAIFATTURIERA NNP
UNANIMITY NN
PER-STORE JJ
RECORDKEEPING NN
TASHKENT NNP
MERKURS NNPS
EXPLORATORY JJ
ELECTRO-OPTICS NNP NNS
DEATH-BENEFIT JJ
DISHWASHER NN
TRADITION-BOUND JJ
DEPRESSING JJ VBG
HDTV NN NNP
PORTER NNP
RUSSIAN JJ NNP
DREAMING VBG
HIGGINS NNP
APPROPRIATED VBN VBD
ALLIANCES NNS
KISSINGER NNP
SINISTER JJ
STARTUP NN
WILDE NNP
315.2 CD
315.5 CD
DEPRESSION NN NNP
CHIRIQUI NNP
315.8 CD
SERVICE-INDUSTRY NN JJ
CERTS NNP
ONLY RB JJ
PILLAR NN
URBAN-DEVELOPMENT NN
SENDING VBG
BOTTOMS NNS
RADAR NN
PILLAY NNP
ACCENT NN
SUBSEQUENT JJ
PRECEDING VBG JJ
MARRILL NNP
ASSASSINATIONS NNS
DEBACLES NNS
UNPLEASANTNESS NN
SOCIOLOGICAL JJ
D'AGOSTO NNP
MARIEL NNP
FREE-CHOICE JJ
APPETITE NN
ILLIQUID JJ
ANNOUNCEMENTS NNS
CEREALS NNS
AETERNA FW
STOMACHS NNS
COURAGE NN
74,000 CD
16,800,000 CD
MATSUSHITA-MADE JJ
INCREASE NN VB VBP
SCANNER NNP
TURKISH JJ
TURGUT NNP
489.9 CD
BROADSIDE NN
GOVERNMENT-SPONSORED JJ NNP
GUTENBERGHUS NNP
TICKETRON NNP
CAMPBELL-MITHUN-ESTY NNP
EISENBERG NNP
REHASHING VBG
TANNED VBN
PUBLICATION NN
KNOW-HOW NN
INSURED VBN JJ NN VBD
BODNER NNP
235.2 CD
CRAZEE JJ
235.5 CD
ATTARCKS NNS
DEVASTATINGLY RB
JOINS VBZ
CROSS-POLLINATED VBN
JOINT JJ NN NNP
CIGAR NN
INSURER NN
TANNER NNP
INSURES VBZ
OLSON NNP
HORMONES NNS
1,100 CD
23-DAY JJ
ACCEPT VB VBP
1,108 CD
WACHTLER NNP
18-HOLE JJ
PORK-BARRELING NN
BICAMERAL JJ
FACTION NN
PLATFORM NN
CANANEA NNP
COTTAGE NN
RAPPORT NN NNP
CROTALE JJ
WALDBAUM NNP
1,111 CD
DETAINING VBG
TWO-TIME JJ
POMOLOGICAL JJ
1,118 CD
GOODSON NNP
155.1 CD
FOUR-TO-ONE RB
UNPOPULARITY NN
155.3 CD
155.4 CD
155.6 CD
PERFORMING-ARTS NNS
155.7 CD
KELLY\/VARNELL NNP
LIGHT-INDUSTRIAL JJ
LIONS NNS
12,190,000 CD
COLLAGEN NN NNP
PEDAL VB
PER-CAPITA JJ
YELLS VBZ
THRIFT-ACCOUNTING NN
COUNCILMAN NN NNP
COLLAGES NNS
AUTO\/HOMEOWNERS NNS
SWAYED VBN
PICHIA NN
1,120 CD
COMPUTER-PRODUCTS NNS
HORICON NNP
PRECIPITATING VBG
COCHE-DURY NNP
1,124 CD
GLENN NNP
JOCELYN NNP
PLANTING VBG NN
VIRAL JJ
SANDPAPER NN
DOGGING VBG
GUILDFORD NNP
AUDIOCASSETTES NNS
DISPEL VB
CAMPFIRE NN
UNIFORMED JJ
DIALS NNS
DEFAULTERS NNS
UNVEILING NN VBG
1,130 CD
SQUARE JJ NNP NN VB RB
5.1950 CD
ACCESS NN VB
ABUSED VBN JJ VBD
GUILD NN NNP
GUILE NN
END-OF-YEAR JJ
STUTTER NN
BASHING VBG NN
FAMED JJ VBN
THIRST NN
1.01 CD
AMADOU-MAHTAR NNP
ALISARDA NNP
1.02 CD
ETHIOPIAN JJ
1.03 CD
LEIGH-PEMBERTON NNP
RUFFO NNP
CORRESPONDINGLY RB
1.04 CD
ABUSES NNS
1.05 CD
SPECIALISTS NNS
1.06 CD
GUILT NN
1.07 CD
1.08 CD
1.09 CD
YEHUDI NNP
49,000 CD
SIMMERING VBG
QUANTITY-BASED JJ
EARMARKED VBN VBD
KNITTED VBN
1,141 CD
1,143 CD
BUTTONED-UP JJ
14-POUND JJ
497.34 CD
TATEISHI NNP
WILKE NNP
MAXIMIZING VBG
DIANA NNP
1.10 CD
CONTRACT-DRILLING NN VBG
1.11 CD
DIANE NNP
1.12 CD
1.13 CD
THIRTY CD
1.14 CD
PATROLS NNS
ANNAPOLIS NNP
1.15 CD
TILLERY NNP
EMASCULATION NN
1.16 CD
WINNERS NNS
WEIGHS VBZ
POST-VIETNAM JJ
1.17 CD
PFEIFFER NNP
30,180 CD
1.18 CD
WEIGHT NN VB NNP
1.19 CD
FESTER VB
SCANNELL NNP
FEARS NNS VBZ
D'ADMINISTRATION NNP
BROKERAGE NN NNP
1,150 CD
FISSURES NNS
MOHAMAD NNP
1,155 CD
MICROECONOMICS NNS
ANNOUNCED VBD VBN JJ
OUTBREAK NN
HAMMERSMITH NNP
SEVEN-MONTH-OLD JJ
ONTO IN
1.20 CD
1.21 CD
1.22 CD
REHNQUIST NNP
1.23 CD
1.24 CD
FAILED VBD VBN JJ
BISCUITS NNP NNS NNPS
1.25 CD
REDFORD NNP
ESSENCE NN
BINGHAMTON NNP
1.26 CD
TIRESOME JJ
1.27 CD
NIDAL NNP
1.28 CD
RICHTERIAN JJ
ANNOUNCER NN
1.29 CD
ANNOUNCES VBZ
WILLS NNS
QUARTER-OF-A-CENTURY JJ
FRANCOIS-PONCET NNP
RADIO NN NNP
CLAUDICATION NN
WILLY NNP
REARED VBN
POTENTIALLY RB
MIDDAY NN
BRIEFINGS NNS
SOUVENIR NN
U.S.-JAPAN JJ NNP
COURANT NNP
SHIMMERED VBD
MANUAL JJ
COMPETITIONS NNS
1.30 CD
1.31 CD
1.32 CD
DIRECTED VBN VBD NNP
VIREN NNP
ONUS NN
1.33 CD
SABOTAGE NN VB
1.34 CD
PATRONS NNS
1.35 CD
MEDIOCRE JJ
1.36 CD
1.37 CD
CONTESTED VBN JJ VBD
1.38 CD
COMPACT-CAR NN
1.39 CD
STREETSPEAK VB NNP
MICROSYSTEMS NNPS NNP
MOUNTAIN-BIKE NN
35-HOUR JJ
FEATS NNS
CERAMIC JJ
HIGH-PRODUCTION JJ
REUTER NNP
MEDIUM-HAUL JJ
MARINA NNP
SPILLANE NNP
YUZEK NNP
RANK-AND-FILE JJ
1,174 CD
INCENTIVE-BUOYED JJ
ZARETT NNP
TAYLOR NNP
MARINE NNP JJ NN
1.40 CD
TERRIZZI NNP
FAMINES NNS
1.41 CD
SCAM NN
TONGUE-LASHING NN
SCAN VB
1.42 CD
1.43 CD
MARINO NNP
1.44 CD
RUVOLO NNP
AMGEN NNP
1.45 CD
SCAR NN
1.46 CD
ASTROPHYSICIST NN
1.47 CD
1.48 CD
RECENTRALIZED VBN
1.49 CD
HAIRLINE NN
RETROACTIVELY RB
OGDEN NNP
SCULPTORS NNS
LOW-CRIME JJ
EXPORT-RELATED JJ
ANOTHER DT NN
LABELS NNS VBZ
PRUDHOE NNP
PREMATURELY RB
BLEMISHES NNS
COMPILATION NN
PRONOUNCEMENTS NNS
BROTHERHOOD NNP
LENGTH NN
375-AN-OUNCE JJ
COSTANZA NNP
1.50 CD
1.51 CD
1.52 CD
MARION NNP
1.53 CD
1.54 CD
1.55 CD
JUDGE'S NN
1.56 CD
1.57 CD
VINING NNP
1.58 CD
1.59 CD
17-CITY JJ
NORIEGAN JJ
ABIDE VB
DIARY NN NNP
MOHAMED NNP
EYING VBG
ANTI-INFLATION JJ
TRILLION-PLUS NN
STIPULATED VBD
ARTERIES NNS NN
BULLETIN NN NNP
ORBIS NNP
ORBIT NN
TEXTBOOKS NNS
TWO-ROOM JJ
1.60 CD
1.61 CD
FABBRI NNP
LASCIVIOUSLY RB
1.62 CD
1.63 CD
1.64 CD
UPPER-CRUST JJ
1.65 CD
1.66 CD
MANHANDLED VBN
1.67 CD
1.68 CD
STIPULATES VBZ
1.69 CD
410,000 CD
PROFITING VBG
HEAD NN VB VBP JJ NNP
WHAMMY NN
ARCADES NNS
GREENMAIL NN
GIROZENTRALE NNP
TORTURED JJ VBN
PRESUMING VBG
HEAL VB
GUISE NN
HASTILY RB
HEAP NN
MEDITERRANEAN NNP
PASHAS NNS
HEAR VB VBP
TEMPERATURES NNS
HEAT NN VB NNP
MANUEL NNP
UNIFORMLY RB
ORIGINATED VBN VBP
1.70 CD
1.71 CD
1.72 CD
1.73 CD
1.74 CD
1.75 CD
TRAGICALLY RB
MADDENINGLY RB
1.76 CD
OPTICAL JJ NNP
PEPPERDINE NNP
1.77 CD
CREATING VBG
1.78 CD
INCREASED VBN VBD JJ VB VBN|JJ
88.1 CD
1.79 CD
88.3 CD
88.5 CD
ORIGINATES VBZ
88.7 CD
88.8 CD
WIGGLING VBG
543,000 CD
ANTI-WHITE JJ
HOPKINS NNP
SCANNERS NNS
INCREASES NNS VBZ
MORE-STRINGENT JJ
BECOMES VBZ
EASED VBD VBN
ARTICLE NN NNP
TURNAROUNDS NNS
1.80 CD
REGULARITY NN
1.81 CD
BURGLARY NN
1.82 CD
1.83 CD
KODAK NNP NN
1.84 CD
1.85 CD
SYNOPTICS NNPS
1.86 CD
1\/2-FOOT-TALL JJ
1.87 CD
TOLLS NNS
1.88 CD
SUBTITLED VBN
1.89 CD
12.375 CD
EASES VBZ
UNLAWFULLY RB
USED-CAR JJ NN
CREATION NN
374.19 CD
PILLOW NN
ESTATES NNP
HECK NN UH
ANTI-PROSTITUTION JJ
CIGNA NNP
COLSTON NNP
SOREN NNP
1.90 CD
1.91 CD
1.92 CD
1.93 CD
SONNETT NNP
PASTORS NNS
1.94 CD
THEN-PREVAILING JJ
1.95 CD
374.20 CD
1.96 CD
FOOTNOTE NN
1.97 CD
NON-SALES JJ
1.98 CD
MARIST NNP
SHAKEUP NN
1.99 CD
240,000 CD
RETRIAL NN
XEROX NNP
HALF-EMPTY JJ
FAULTLESSLY RB
DAY-TO-DAY JJ
GUESTS NNS
PATENT-LAW NN
INEVITABILITY NN
CLASSMATE NN
COLORIZATION NN
REIGNED VBD
NEWQUIST NNP
VALAIS NNP
DRESS NN VB VBP NNP
SOUTHAM NNP NN
STEADIED VBD VBN
LARSEN NNP
PROCREATION NN
VETOED VBD VBN
PIGMENTS NNS
CAPACITORS NNS NNP
GRADUATION NN
VRANIAN NNP
STEADIER JJR
VETOES NNS
HEED VB NN
RIGOROUS JJ
SCANDAL-TRIPPED JJ
HEEL NN
HEEM NNP
UNREGULATED JJ
DIRECTLY RB
SHEARSON NNP
YONEYAMA NNP
HEES NNP
BEDLAM NN
LEGALIZING VBG
FORTHRIGHTLY RB
FANCIFUL JJ
NON-COCOM JJ
PIANOS NNS
NUGGET NNP
OVERRULING VBG
BEDDING NN
UPTURN NN
MEANDERS VBZ
OBSERVING VBG
HAMBURGERS NNS
366.27 CD
HEADQUARTER JJ
MONETARISTS NNS
PITCHER-COACH NN
84.15 CD
PIZZAZZ NN
DAYAC NNP
THEORIES NNS
PROGRAMMING NN VBG
CONSUMER-ADVOCACY JJ
LOAN-TO-VALUE JJ
BUNKER NNP
DEMME NNP
SUDDENLY RB
POVICH NNP
FUJI-APPLE JJ
INFERENCE NN
GENUINELY RB
HIDEBOUND JJ
LESPINASSE NNP
NATIONAL-SECURITY NN
SHAKESPEAREAN JJ
APPRECIATE VB VBP
92.42 CD
84.29 CD
PROGRAM-RELATED JJ
PEOPLED VBN
MICROCOMPUTER NN JJR
WHISPERED VBN
TIME-HONORED JJ
MCGWIRE NNP NN
MIDDLE NN JJ NNP
CRAPSHOOT NN
TWINDAM NN
382.81 CD
BACKBONE NN
DISSEMINATE VB
SLEEVES NNS
PEOPLES NNS NNPS NNP
BUCKINGHAM NNP
LANGUISH VB
OBFUSCATE VB
DIRECTOR NN NNP
BANGKOK NNP
CHAIN-STORE JJ
SMOOTHEST JJS
PECCADILLOES NNS
HOMEEQUITY NN
THEORY-TEACHING VBG
NOTORIETY NN
TURKMENIA NNP
366.50 CD
BUCARAMANGA NNP
374.70 CD
DEMON NN
PURDY NNP
366.55 CD
PAPER NN NNP NNS
SHMALTZY NN
EXCHANGE-RATE NN JJ
ENTERPRISE NN NNP NNPS
RAFFERTY NNP
HEIN NNP
RESURRECTION NN
PRAISED VBD VBN
ATTICS NNS
HEIR NN
MINISTER NNP NN
TERMINATED VBD VBN
ENIGMA NN
INTENSIFIED VBN VBD JJ
CREATIVE JJ NNP
PRAISES VBZ NNS
FURUTA NNP
PEDRO NNP
WESTCOAST NNP
BANKRUPTCY-COURT NN JJ
COMICS NNPS
PROPAGANDISTS NNS
PREJUDICED JJ VBN
INTENSIFIER NN
LOUISIANA-PACIFIC NNP
JEROME NNP
NEW-BUSINESS JJ NN
IDEALLY RB
PORTSMOUTH NNP
THERAPISTS NNS
OBSTINATE JJ
CENTER-RIGHT JJ
REAGAN-BUSH JJ
PREJUDICES NNS
EUCALYPTUS NN
PERRIN NNP
HOURS NNS
ALMADEN NNP
231,405 CD
UNEXPLAINED JJ
366.79 CD
REBUTTED VBN
QUESTECH NNP
PURGE VB
HOUSE NNP NN VB VBP
HEAVIER JJR RBR
SIX-BOTTLE JJ
IMPLORES VBZ
CAREENING VBG
POTENTIAL JJ NN
3,855.60 CD
14,789,000 CD
WESTAMERICA NNP NN
EXECUTED VBN VBD JJ
AFTERSHOCK-DAMPING JJ
REPEAL NN VB
ACHIEVED VBN VBD
366.85 CD
SUBSKILLS NNS
HELD VBN VBD JJ
ORIGINATOR NN
366.89 CD
STEADILY RB
76.50 CD
RANKLED VBN
REPEAT NN VB
GRAPEVINE NN
GIVING VBG NN
HELL NN UH
84.75 CD
HELM NN NNP
EXECUTES VBZ
INCOMPREHENSIBLE NN
ACHIEVES VBZ
HELP VB NN VBP
STOCK-OPTION JJ NN
501.61 CD
SUBLICENSE NN
METAL-WORKERS NNS
BUYING VBG NN NNP JJ
ORDINARIES NNP
ENTERS VBZ
JOINED VBD VBN
SCOT NNP
FLASHLIGHTS NNS
CHOOSING VBG NN
INSTRUCTION-SET NN JJ
INCONGRUITY NN
55.875 CD
TIME-STRAPPED JJ
SHANTYTOWN NN
664.3 CD
68.42 CD
DIPLOMACY NN
RESISTED VBN VBD
84.82 CD
497,400 CD
EXTREMIST NN
PANCAKES NNS
TAFFNER NNP
76.66 CD
MORINAGA NNP
SHAREHOLDER NN
CAUTION NN VBP VB
MESSIAEN NNP
410.3 CD
SOROS NNP
410.4 CD
410.5 CD
VIRUS NN
ANOMALIES NNS
PENNY-STOCK JJ NN
DRESSING VBG
O'DWYER NNP
APPLE-INDUSTRY NN
UNLEADED JJ
84.90 CD
CONTEMPORARY JJ NNP
COMPOSTING NN
CYNICAL JJ
BACHES NNPS
MINIMAL JJ
SIDELINE NN
HENS NNS
LARSON NNP
GARGAN NNP
SINGLETON NNP
WEATHERLY NNP
OBSOLETING VBG
PEREMPTORY JJ
MONACO NNP
99.771 CD
APPOINTMENTS NNS
HEDGERS NNS
99.775 CD
ANOINTING VBG
POWER-HITTER NN
LIEUTENANTS NNS
COMPILED VBN
INSURANCE-CLAIMS NNS
DECAPITALIZE VBP
JEAN-PIERRE NNP
330.1 CD
NEWSPAPER-PUBLISHING JJ
FOODSERVICE NN
COMPILER NN
DECENCY NN
COMPILES VBZ
SKEWED VBN JJ
CITIBANK NNP
VISUALS NNS
KASPAROV NNP
GRADMANN NNP
HABIT NN
5,267,238 CD
PIECED VBN
PEACETIME NN
BYELORUSSIA NNP
COUNTERS NNS
REGAIN VB VBP
PIECES NNS NNP
INTER-OFFICE JJ
EUROBOND NNP NN
SORRY JJ RB
UKRAINIAN JJ
TALLYING VBG
TECHNIQUE NN
COMMENTARIES NNS
KIRSCHNER NNP
WELL-BALANCED JJ
SHOW-STOPPERS NNS
AISLE NN
SELF-PERPETUATING JJ
LENIENT JJ
CERVIX NN
INITIALED VBD
BALLET NN NNP
COUNTESS NN
OIL-FIELD NN JJ
WHOLESALER NN
250.2 CD
ENFIELD NNP
CONTINUOUS JJ
OOHS UH
SIX-GAME JJ
EVALUATED VBN VBD
POLLEN-INHIBITING JJ
HERB NN NNP
COPPER-PRODUCING JJ
AMMONIA NN
FRIGATE NN
REVOLUTIONIZED VBD
RIFKIN NNP
HERD NN
9-10:30 CD
HERE RB
MISCHIEF NN
HACKEL NNP
MARGLER NNP
EVALUATES VBZ
MUCH JJ RB
PUBLICATIONS NNS NNP NNPS
COMPLACENCY NN
HACKER NN
HERO NN
SCUD NNP
MUCK NN
CONGENIAL JJ
HERS PRP JJ
HEAVILY RB
P.J. NNP
JACKING VBG
ROCKETDYNE NNP
GOLDEN NNP JJ
DEFRAUDING VBG
CREOLE NNP
SORTS NNS
FALKLAND NNP
ORGANISM NN
ANTIBIOTIC JJ NN
FERRETING VBG
BEFRIENDED VBN
DEDUCTIBLES NNS
SPIGOTS NNS
MUDD NNP
ELEVATED VBD JJ
FLOWCHART NN
DAYNA NNP
HAIR-GROWING JJ
HESS NNP
QUADRENNIAL JJ
BLOOD-LETTING NN
170.3 CD
ELEVATES VBZ
170.4 CD
OGILVY NNP NN
170.6 CD
INVENTED VBD VBN
ALLOWING VBG
ORDINARILY RB
141,903 CD
HALCION NNP
SHUTOFF NN
22,000 CD
VEGETABLES NNS
VYAS NNP
TERMINATOR NNP
MOVE-UP JJ
COMCAST NNP
VICTORIAN JJ
THEORIST NN
LIPID NN
219.19 CD
BOOMED VBD VBN
39-CENTS-A-POUND JJ
TERRORISTIC JJ
COMING VBG JJ
SHORTAGE NN
OPEN-ENDED JJ
WAREHOUSE-TYPE NN
TRIVIALIZE VB
COST-CUTTING JJ NN
SUBMITTING VBG
34468.69 CD
ENJOYED VBN VBD
LITURGY NN
ASUNDER RB
219.27 CD
MAILSON NNP
92-DAY JJ
P.M. NN RB
RULE-MAKING NN
SCRAPE VB NN
MALAYSIAN JJ
SENATE NNP NN
UPGRADING VBG NN
UNAVAILABLE JJ
PEACEFUL JJ
LAWYERS NNS NNP NNPS
MESNIL NNP
SURREY NNP
SCRAPS NNS VBZ
DIVORCE NN
UPSCALE JJ NN
DICTATORSHIP NN
EXECUTOR NN
TRADING-ROOM NN
SUKHOI NNP
UNGARETTI NNP
POACHERS NNS
STORAGE NN NNP
STREET-STYLE JJ
CLOGGED VBN JJ
BIG-COMPANY JJ
GUIDELINE NN
N.C.-BASED JJ
HUDDLED VBD
PURRS VBZ
GOLDIN NNP
STOPGAP NN JJ
MINISTRY NNP NN
BEHEMOTHS NNS
CENTENNIAL NN NNP JJ
[truncated: 200,091 more chars]
