# Supplementary material for: ScholarLens: extracting competences from research publications for the automatic generation of semantic user profiles
Source: PeerJ journal article supplement (doi:10.7717/peerj-cs.121), 2017-07-03
Supplement: Pipeline.zip [file Pipeline.zip › Pipeline/gate/plugins/ANNIE/resources/heptag/lexicon_lower]

! .
# #
$ $
% NN JJ
& CC SYM
' POS '' :
'' ''
" ''
'30s CD NNS
'40s CD NNS
'50s NNS CD
'60s NNS CD
'70s NNS CD
'80s NNS CD
'90s NNS CD
'cause IN
'd MD VBD NNP
'em PRP
'll MD
'm VBP
'n' CC
're VBP
's POS VBZ PRP NNP NNS
'til IN RB
've VBP VB
( (
) )
, ,
- :
– :
-- :
. .
... :
.what WDT
1 CD LS
1-2-3 NNP JJ
1-800-453-9000 CD
1-Dec NNP
1-for-17 NN
1.5-mile CD
1.70-to-1.90 CD
1.8650-1.8850 CD
10%-12 CD
10-11 CD
10-2 CD
10-year JJ CD
100-Share NNP
100-stock JJ CD
100th JJ
1069 NNP
107 CD NNP
10K JJ
10th JJ
11 CD NNP
11-2 CD
116th NNP
11th JJ
12-2 RB
12-inches NNS
12-pack NN
120-140 CD
12th JJ
13-12 CD
13-7 CD
13th JJ NNP NN
14-Sept. NNP
142-143.50 CD
145-150 CD
14th JJ
15 CD VBN
150th JJ
155-mm CD
15th JJ
16-year-olds NNS
16th JJ
17th JJ
18-year-olds NNS
1805-91 CD
1830-1930 CD
1850s NNS
1890s CD NNS
18th JJ
19-Nov NNP
19-year-olds NNS
190-point JJ NN
1900s NNS CD
1915-1923 CD
1920s CD NNS NN
1928-33 CD
1930s NNS CD
1937-40 CD
1937-87 CD
1940-1987 CD
1940s NNS CD
1948-89 CD
1950s CD NNS
1960s NNS CD
1962-63 CD
1962-85 CD
1967-68 CD
1969-72 CD
1970-85 CD
1970s NNS CD
1971-1974 CD
1973-75 CD
1974-75 CD
1974-81 CD
1975-80 CD
1979-80 CD
1980s CD NNS NN
1982-1984 CD
1982-83 CD
1982-84 CD
1983-1987 CD
1983-85 CD
1984-1989 CD
1984-85 CD
1985-86 CD
1986-87 CD
1987-88 CD
1988-89 CD
1989 CD NNP
1989-1 NNP
1989-1990 CD
1989-3 CD
1989-82 CD
1989-83 CD
1989-84 CD
1989-85 CD
1989-86 CD
1989-87 CD
1989-88 CD
1989-89 CD
1989-90 CD
1989-A NNP
1989A NNP
1989B NNP
1990-1995 CD
1990-2000 CD
1990-2002 CD
1990-2004 CD
1990-2009 CD
1990-91 CD
1990-94 CD
1990-model JJ NN
1990A NNP
1990s CD NNS
1991-1996 CD
1991-1999 CD
1991-2000 CD
1992-1999 CD
1992-2000 CD
1993-2009 CD
1995-1999 CD
1996-2000 CD
1997-2000 CD
1998-2011 CD
19th JJ
19th-century JJ NN
1:30-6 CD
1\/10th NN
1\/2-year JJ CD
2 CD LS ,
2-0 CD
2-1 CD
2-23 CD
2-3 CD
2-4 CD
2-5 CD
2-8 CD
2.41-to-1 CD
2.79-to-1 CD
20 CD NNP
20-stocks NNS
200-300 CD
200-lawyer NN
2001-2005 CD
2003-2005 CD
2003-2008 CD
2008-2009 CD
2009-2011 CD
200th JJ
204s NNS
20Dec NNP
20s CD NNS
20th JJ
21-9 CD
21-June NNP
215-898-6791 CD
21st JJ CD
22nd JJ CD
23-5 CD
230-215 CD
231-191 JJ CD
236-6510 CD
24-Dec NNP
240SX NNP
24th JJ
25th JJ
26th NNP JJ
27-March NNP
271-147 CD
27th JJ
28th JJ
29year JJ
3 CD LS NNP
3-0 CD
3-1 CD JJ
3-4 CD
3-4-5 CD
30-Nov. NNP
30-Oct NNP
30-day JJ CD
30-share JJ CD
30-year JJ CD
300-113 CD
300-day JJ CD
300ZX NNP
301 CD NNP
3090s NNS
30s CD NNS
30th JJ
314-968-3770 CD
320-200 CD
321-99 CD
323s NNS
338-44 RB
340B NNP
345-47 CD
349-0126 CD
34th NNP JJ
35,000-to-$50,000 CD
35-44 CD
35th JJ
37-hour CD
37th JJ
382-37 CD
383-30 CD
38th NNP
390-million CD
3COM NNP
3M NNP
3rd-Quarter NNP
4 CD LS
4-1 CD
4-Dec. NNP
400th JJ
401-18 CD
40th JJ
41-year-old JJ CD
42nd NNP
45,000-$60,000 CD
45th JJ
47%-controlled CD
470th JJ
486tm NN
4th JJ
5 CD LS
5-0 CD
5-1 CD
5-12 CD
5-fluorouracil NN
5-for-24 CD
50-50 JJ CD
500-Stock NNP
500-lawyer NN
500-stock JJ NNP CD
505-455 CD
50th JJ
51-48 JJ CD
52%-36 CD
55-year-old JJ NN
55th JJ NNP
57-year-old JJ NN
57th NNP JJ
581-7907 CD
585-lawyer NN
5th JJ
6-4 CD
60 CD NNP
62nd JJ
64-35 CD
645-293 CD
65th NNP JJ
666-1260 CD
67-31 CD
69-26 CD
7-11 CD
7-28 CD
7-Eleven NNP
70-A21 CD
707s NNPS
71%-owned CD JJ
72-yearold CD
727 NNP CD
737-300 NNP
747 CD NNP
747-100s CD
747-400 NNP JJ
747-400s CD NNS
75-cents-an-hour NNS
75-year-old CD
750th JJ
757 CD NNP
757-200s NNS
75th JJ
767 CD NNP
767-300 NNP
767-300ER NNP
7A NN
7B NN
8%-10 CD
8-10 CD
8-11 CD
8-2 CD
8-9 CD
80%-owned JJ CD
80-lawyer NN
800-462-9029 CD
800-line NN
800-number NN
80s NNS
821-201 CD
82nd JJ
8300 CD JJ
8300s NNS
84-6 RB JJ
857-161 CD
87-7 CD
871-0090 CD
880 CD NNP
89-107 CD
89-136 CD
89-52 CD
8th JJ
9-10 CD
9-10:30 CD
9-11 CD
9-5 CD
9-6 CD
9-8 CD
900-TELELAW NN
91-23 CD
913-864-3982 CD
914-251-6200 CD
92-14 CD
941-105 CD
95-37 CD
97-1 CD
99-04 CD
99-cent CD
9:30-10 CD
: :
; :
= SYM
? .
@ IN SYM
\*\* SYM
` ``
`` ``
a DT SYM FW JJ LS NNP IN
a.k.a JJ
a.k.a. JJ
a.m RB NN
a.m. NN RB
a.m.-1:30 CD
a\/k\/a IN
aback RB
abandon VB VBP
abandoned VBN VBD JJ
abandons VBZ
abate VB
abated VBN VBD
abates VBZ
abdicate VBP
abducted NN
abetted VBN
abide VB
abnormal JJ
aboard IN RB
abolish VB
abolished VBN VBD
aborted JJ VBN
abortion-rights NNS JJ
abound VBP
abounded VBD
abounds VBZ
about IN RB RP JJ RBR
about-face NN
above IN JJ RB
abrasive JJ NN
abroad RB
abrupt JJ
absent JJ VB
absolute JJ
absolve VBP
absorb VB VBP
absorbed VBN VBD
absorbent JJ
absorbs VBZ
abstained VBD
abstract JJ
absurd JJ
abundant JJ
abuse NN VB
abused VBN JJ VBD
abuzz JJ
academic JJ NN
acccounting NN
accede VB
acceded VBD
accelerate VB VBP
accelerated VBD VBN JJ
accelerates VBZ
accelerating VBG JJ
accept VB VBP
accepted VBD VBN JJ
accepts VBZ
access NN VB
accessory JJ
acclaim NN VB
accommodate VB VBP
accommodated VBN
accomodate VB
accompanied VBN VBD
accompanies VBZ
accompany VB
accompanying VBG JJ
accomplish VB
accomplished VBN JJ
accomplishes VBZ
accord NN VB
accorded VBN VBD
account NN VBP VB
account-churning NN
accounted VBD VBN
accounting NN VBG JJ
accounts NNS VBZ
accreted VBN
accrue VB
accrued VBN JJ
accrues VBZ
accumulate VBP
accumulated VBN
accurate JJ
accusatory JJ
accuse VBP VB
accused VBN VBD
accuses VBZ
accustomed VBN JJ
aces VBZ
achieve VB VBP
achieved VBN VBD
achievement-test NN
achieves VBZ
acid NN JJ
acid-rain NN
acidified VBN
acknowledge VBP VB
acknowledged VBD VBN JJ
acknowledges VBZ
acquainted VBN
acquiesce VB
acquiesced VBD
acquire VB NN
acquired VBN VBD JJ
acquires VBZ
acquit VB
acquitted VBN
across IN RP
across-the-board JJ NN
across-the-board-cuts NNS
act NN VB VBP
acted VBD VBN
acting VBG JJ NN
activate VBP
activated VBN
active-matrix JJ NN
activist NN JJ
actress NN
acts NNS VBZ
actual JJ
actuarial JJ
actuary NN
acute JJ
ad NN FW
ad-agency NN
adamant JJ
adapt VB VBP
adapted VBN VBD
adapting VBG NN
add VB VBP
added VBD VBN JJ
addicted VBN JJ
addiction-treatment JJ NN
additional JJ
address VB NN VBP
addressed VBN VBD
addresses NNS VBZ
adds VBZ
adept JJ
adequate JJ
adhere VB
adhered VBD
adhesive NN JJ
adjacent JJ
adjective NN
adjoining JJ
adjourned VBN
adjust VB VBP
adjusted VBN JJ VBD
adjusting VBG NN
adjusts VBZ
admen NNS
administer VB
administered VBN
administers VBZ
admired VBN VBD
admires VBZ
admit VB VBP
admits VBZ NNS
admitted VBN VBD
adolescent JJ NN
adopt VB VBP
adopted VBN VBD
adopts VBZ
adorn VB
adorned VBD VBN
adroit JJ
adult NN JJ
advance NN VB JJ VBP
advanced VBD JJ VBN
advanced-ceramics NNS
advanced-technology JJ NN
advantage NN VB
adversarial JJ
adversary NN
adverse JJ
advertise VB VBP
advertised VBN VBD JJ
advertises VBZ
advertising NN VBG VBG|NN
advertorial JJ
advise VB VBP
advised VBD VBN
advises VBZ
advising VBG NN
advisory JJ NN
advocate NN VBP VB
advocated VBN VBD
advocates NNS VBZ
aegis NN
aerial JJ
aerobics NN NNS
aerospace NN JJ
aesthetic JJ NN
aeterna FW
affect VB VBP NN
affected VBN JJ VBD JJ|VBN
affectionate JJ
affects VBZ
affiliated VBN JJ
affirmative-action NN
affirmed VBD
afflict VB
afflicted VBN
afflicts VBZ
affluent JJ NN
afford VB VBP
afforded VBN
afield RB
afire RB
afloat RB
afoot RB
aforethought JJ
afraid JJ
aft JJ
after IN RB
after-hours JJ NNS
aftertax JJ NN
afterward RB
afterwards RB
again RB
against IN
age NN VBP
aged VBN
aggravate VB VBP
aggravated VBN VBD
aggravates VBZ
aggravating JJ VBG
aggregate JJ NN
aggressiveness NN
aghast JJ
aging VBG NN
agitated VBN
ago RB IN
agonize VB
agonizing JJ
agree VBP VB
agreed VBD VBN NN JJ
agrees VBZ
agricultural JJ
agrochemical NN
ahead RB
ahs UH
ai VBP VBZ
aid NN VB
aided VBN VBD
aids NNS VBZ
aikido FW
ailing VBG JJ
aim NN VB VBP
aimed VBN VBD
aims VBZ NNS
air NN VB VBP
air-cargo NN
air-conditioner NN
air-conditioning NN JJ
air-freight NN JJ
air-interdiction NN
air-passenger NN
air-pollution NN
air-quality NN
air-separation NN
air-traffic NN
airborne JJ
airborne-radar NN
airconditioner JJR
aircraft NN NNS
aircraft-electronics NN
aired VBD VBN
airing VBG NN
airlifted VBN
airmen NNS
airs NNS VBZ
airy JJ
akin JJ
alarmed VBN JJ
alarming JJ VBG
alarms NNS VBZ
alas UH
albeit IN
alert VB JJ NN
alerted VBD
alerts VBZ
alfresco RB
alien JJ NN
alienate VB
alienated VBN
alienates VBZ
alienating VBG JJ
align VBP
aligned VBN
alike RB
alive JJ RB
all DT PDT RB RB|DT
all-in-all RB
allay VB
allayed VBN
allege VBP VB
alleged VBN JJ VBD
alleges VBZ NNS
alleviate VB
allied VBD
allnight JJ
allocate VBP VB
allocated VBN VBD
allocating VBG NN
allout JJ
allow VB VBP
allowed VBN VBD JJ VB
allows VBZ
alluded VBD
alluring JJ
alluvial JJ
ally NN VB
alma JJ
almost RB
aloft RB
alone RB JJ
along IN RB RP RB|RP
alongside IN
aloud RB
already RB
also RB
also-ran NN
alter VB VBP
altered VBN JJ VBD
alternate JJ
alternates VBZ NNS
alternative NN JJ
although IN
altogether RB
aluminum NN JJ
aluminum-makers NNS
alumni NNS
alumnus NN
always RB
am VBP RB
amalgamate VB
amass VB VBP
amassed VBN VBD
amasses VBZ
amateur JJ
amateurish JJ
amaze VB
amazed VBN JJ
amazing JJ
ambivalent JJ
amble VB
ambulatory JJ
ambushed VBD
amend VB
amended VBN VBD
amid IN
amino JJ
amiss JJ
amok RB
among IN
amongst IN
amortize VB
amount NN VB VBP
amounted VBD VBN
amounts NNS VBZ
amours FW
ample JJ
amplified VBN
amplify VB
amuse VBP
amused JJ VBN
amusing JJ
an DT ,
analog NN JJ
analysis NN
analyze VB VBP
analyzed VBD VBN
analyzing VBG NN
ancestral JJ
anchor VB NN VBP
anchored VBN
ancient JJ
and CC JJ NN NNP IN VBP
and\/or CC
anecdotal JJ
anew RB
angered VBD VBN JJ
angry JJ
animal NN JJ
animal-health NN
animal-rights NN JJ
animalcare JJ
animated VBN JJ
annals NN
anniversary NN
announce VB VBP
announced VBD VBN JJ
announces VBZ
annoyed VBD JJ VBN
annoying JJ
annual JJ
annualized VBN JJ
another DT NN
answer NN VB VBP
answered VBN VBD
answering VBG NN
answers NNS VBZ
antagonize VB
antebellum JJ
antelope NNS NN
anti-Semitism NNP
anti-abortion JJ NN
anti-abortionist NN
anti-abortionists NNS
anti-airline NN
anti-anemia NN
anti-apartheid JJ NN
anti-depressant NN
anti-foreigner NN
anti-government JJ NN
anti-heroes NNS
anti-infectives NNS
anti-intellectualism NN
anti-outsider NN
anti-programmers NNS
anti-takeover JJ NN
antiSony JJ
antianemia JJ
antibiotic JJ NN
anticipate VB VBP
anticipated VBN JJ VBD
anticipates VBZ
antimissile JJ
antique JJ NN
antisocial JJ
antitrust JJ
antiviral JJ
antsy JJ
any DT RB
anyhow RB
anymore RB
anyplace RB
anything NN
anytime RB
anyway RB
anywhere RB
apart RB RP
apiece RB JJ
aplenty JJ RB
apologize VB
apologized VBD
apologizes VBZ
appalled VBN
appalling JJ
apparatus NN
apparent JJ
appartus NN
appeal NN VB VBP
appealed VBD VBN
appealing VBG JJ
appeals-court NN
appear VB VBP
appeared VBD VBN
appears VBZ NNS
appease VB
appeased VBD
appellate JJ NN
appellate-court NN
append VB
appended VBN
appetizing JJ
applaud VBP VB
applauded VBD
applauds VBZ
apple-industry NN
apple-pie NN
applelike JJ
apples NNS JJ
appliance-controls NN
applied VBN VBD JJ
applies VBZ
apply VB VBP
appoint VB
appointed VBN VBD JJ
appraise VB
appraised VBN
appreciate VB VBP
appreciated VBN VBD
appreciates VBZ
apprised VBN
approach NN VBP VB
approached VBN VBD
approaches NNS VBZ
appropriate JJ
appropriated VBN VBD
appropriateness NN
approve VB VBP
approved VBD VBN JJ
approves VBZ
approximate JJ
approximates VBZ
apt JJ
arbitrates VBZ
arcane JJ
arch VBP NN
arched JJ VBD
architectural JJ
archival JJ
archive NN
archness NN
archrival JJ NN
ardent JJ
are VBP NN IN NNP
argue VBP VB
argued VBD VBN
argues VBZ
arise VB VBP
arisen VBN
arises VBZ
arithmetic NN
arm NN VB
armed VBN JJ
arming NN
arms-control NN JJ
arms-kickback NN
arose VBD
around IN RB RP RB|RP
arouse VB
aroused VBN VBD
arouses VBZ
arrange VB
arranged VBD VBN
arranges VBZ
arrest NN VB
arrested VBN VBD
arrive VB VBP
arrived VBD VBN
arrives VBZ
arrogant JJ
arsenic NN
art-auction NN
art-world NN
artery-clogging NN
arthritis NN
articulate VB
artificial JJ NN
artsy JJ
as IN RB JJ
as-yet RB
asbestos NN
asbestos-abatement NN
asbestos-disease NN
asbestosis NN
ascertain VB
ascribe VBP
ascribed VBN
ashore RB
aside RB RP
ask VB VBP
asked VBD VBN JJ
asking VBG NN JJ
asks VBZ
asleep RB JJ
aspire VBP
aspired VBD
aspires VBZ
aspiring JJ VBG
assailed VBD VBN
assassinate VB
assassinated VBD VBN
assault NN VBP
assemble VB VBP
assembled VBN VBD
assembly NN
assembly-line NN
assert VB VBP
asserted VBD VBN
asserts VBZ
assess VB VBP
assessed VBN VBD
asset-forfeiture NN
asset-management NN
asset-valuation NN
assign VB VBP
assigned VBN JJ
assigns VBZ
assimilate VB
assist VB VBP
assistant NN JJ
assisted VBN
assists VBZ
associate JJ NN VBP
associated VBN JJ
assuage VB
assume VB VBP
assumed VBD VBN JJ
assumes VBZ
assure VB
assured VBN VBD JJ
assures VBZ
astonishing JJ
astounding JJ
astounds VBZ
astray RB
astride IN
astute JJ
asunder RB
at IN RP NN
at-bat NN
ate VBD
athlete-s NN
athlete-student NN
athletic-shoe NN
atonal JJ
atop IN
atrun JJ
attach VB VBP
attached VBN VBD JJ
attaches VBZ
attack NN VB VBP
attacked VBN VBD
attacking VBG NN
attacks NNS VBZ
attain VB
attained VBN
attempt NN VB VBP
attempted VBD VBN JJ
attempts NNS VBZ
attend VB VBP
attendant NN JJ
attended VBD VBN
attends VBZ
attest VB
attests VBZ
attic NN
attorney-consultant NN
attract VB VBP
attracted VBD VBN
attractiveness NN
attracts VBZ
attribute VBP NN VB
attributed VBD VBN
attributes VBZ NNS
auction NN VB
auction-house NN
auctioned VBN VBD
audio JJ NN
audio-specialty NN
audit NN VB
audited VBN JJ VBD
auditing VBG NN
audition VB NN
auditor-general NN
audits NN NNS
augment VB
august JJ
aural JJ
aureus NN
austere JJ
authored VBN
authoritarian JJ
authorize VB
authorized VBD VBN JJ
authorizes VBZ
auto-buying NN
auto-dealer NN
auto-emission NN
auto-emissions NNS
auto-industry NN
auto-insurance NN
auto-maker NN
auto-making NN
auto-market NN
auto-sales NNS
autograph NN VB
autographed VBN JJ
autoimmune JJ
automated VBN JJ
automated-quotation NN
automated-teller JJ NN
automates VBZ
avant-garde NN JJ
avec FW
avenge VB
average JJ NN VBP VB
averaged VBD VBN
averages NNS VBZ
averaging VBG NN
averred VBD
avert VB
averted VBN
averts VBZ
avid JJ
avoid VB VBP
avoided VBN VBD
avoids VBZ
avuncular JJ
aw UH
await VBP VB
awaited VBD
awaits VBZ
awake JJ RB
awakened VBN
award NN VB
awarded VBD VBN
awarding VBG NN
awards NNS VBZ
aware JJ
awareness NN
awash RB JJ
away RB RP
awesome JJ
awhile RB
awkward JJ
awoke VBD
awry RB JJ
azure JJ
b SYM LS NN
back RB RP NN JJ VB VBP
back-dating VBG
back-office NN JJ
back-pay NN
back-up NN JJ
back-ups NNS
backbench JJ
backdated VBD
backed VBN VBD JJ
backfire VB VBP
backfired VBN VBD
backfires VBZ
backflips VBZ
backing VBG NN
backlit JJ
backs VBZ NNS
backstage RB
backup NN JJ
backward RB
backwards JJ RB
bacteria NNS
bacterial JJ
bad JJ RB
bad-law NN
baddebt JJ
baffling JJ
bail VB NN
bail-jumping NN
bailed VBD
balance NN VB
balance-of-payments NNS JJ
balance-sheet NN
balanced JJ VBN
balances NNS VBZ
balancing VBG NN
bald JJ
balk VB VBP
balked VBD
ball-bearing NN
balloon NN VB
ballooned VBD VBN
ballooning NN VBG
balloons NNS VBZ
balloting NN
ballyhooed VBN
bamboozled VBN
ban NN VB VBP
banal JJ
band NN VB
banded VBN
bandied VBN
bang NN VB
bangs VBZ
banish VB
banished VBN
bank NN VB VBP
bank-credit NN
bank-debt NN
bank-teller NN
banking NN VBG JJ
bankroll VBP VB
bankrupt JJ VB VBP
bankruptcy-court NN JJ
bankruptcy-law NN JJ
bankruptcy-reorganization NN
bankrupty-law NN
banned VBN VBD
banning VBG NN
banquet-hall NN
bans NNS VBZ
bar NN VB
barbed VBN
bare JJ
bargain NN VB
bargain-basement NN JJ
bargain-hunt VB
bargain-hunters NNS
bargain-hunting NN JJ
bargained VBD VBN
bargaining NN VBG
bargelike JJ
barges NNS VBZ
baroque JJ
barracks NN
barred VBN VBD
barren JJ
barrier-island NN
bars NNS VBZ
bartered VBN
bartering NN
base NN JJ VBP VB
base-price NN
based VBN VBD
baseline NN JJ
bases NNS VBZ
bash NN VB
bashing VBG NN
basic JJ NN
basis NN
basketball-cutback NN
bass NN
bathed VBN
bathing NN
batted VBD VBN
batter NN VB
battered VBN JJ VBD
batting NN VBG
battle NN VBP VB
battled VBD VBN
battles NNS VBZ
be VB VBP
beach-house NN
beachfront JJ
beamed VBN
beaming JJ VBG
beams VBZ
bean-counting NN
bear NN VB VBP
bearing NN VBG
bearish JJ
bears VBZ NNS
beat VB VBD VBP NN JJ
beaten VBN JJ
beating NN VBG
beats VBZ NNS
became VBD
becase IN
because IN RB
become VB VBN VBP VBD
becomes VBZ
bed NN
bedding NN
bedevil VB
bedeviled VBN
bedridden JJ
beef NN VB
beefed VBD VBN
beefy JJ
been VBN VBP
beeper NN JJR
beeping NN VBG
beer-belly NN
beer-distribution NN
beer-industry NN
befall VBP
befallen VBN
befell VBD
befitting JJ
before IN RB RP
beforehand RB
befriended VBN
befuddled VBD
beg VB
began VBD
begged VBN
begin VB VBP
begining NN
beginning VBG NN
begins VBZ
begot VBD
begs VBZ
begun VBN
behave VB
behaved VBD VBN
behaves VBZ
behavior-modification NN
behavioral JJ
beheading NN
behind IN RB RP NN
beholden JJ
beige JJ
being VBG NN JJ VBG|JJ
beleaguered JJ VBN
belie VB VBP
belied VBD
believe VBP VB
believed VBN VBD
believes VBZ
belittle VB
bell-ringer NN
belle FW
bellow VB
bellwether NN JJ
belly NN
belly-flopped VBD
belly-up RB
belong VB VBP
belonged VBD
belongs VBZ
below IN RB
benchmark NN JJ
bend VB
beneath IN
beneficial JJ
beneficiary NN
benefit NN VB VBP
benefit-seeking NN
benefited VBD VBN
benefits NNS VBZ
benevolent JJ
benign JJ
bent NN JJ
bequeathed VBD
berated VBD
bereft JJ
beset VBN JJ
beside IN RB
besides IN
besieged VBN JJ
best JJS RBS RB
best-known JJS JJ
best-performing JJ JJS
best-run JJS
best-seller NN
best-selling JJS JJ
bested VBN VBD
bestiary NN
bestirred VBN
bestowed VBN
besuboru FW
bet NN VB VBD VBP RB VBN
beta NN JJ
beta-blocker NN
beta-thalassemia NN
betrayed VBN
better JJR RBR RB RBR|JJR JJ VB
better-than-expected JJ NN
betting VBG NN
between IN RB
beware VB
bewildered VBN
bewitched VBN
beyond IN RB
biannual JJ
bias NN
biased VBN
bible JJ NN
bicameral JJ
bicentennial JJ NN
bickered VBN
bickering NN VBG
bicycling NN
bid NN VB VBD VBN VBP
bid-to-cover JJ NN
bidding NN VBG JJ
bids NNS VBZ
biennial JJ
bifurcate VB
big JJ
big-business NN
big-city JJ NN
bigger JJR RBR
biggest JJS
biking NN
bilateral JJ
bilingual JJ
bill NN VB VBP
billed VBN VBD
billing NN VBG
billion CD
billion-franc NN
billion-plus CD JJ
bills NNS VBZ
bimonthly JJ
binding JJ VBG
bio-research NN
bioTechnology NNP
biographer\/critic NN
biomedical-products NNS
biotech JJ
bipartisan JJ
biped NN
birth-control JJ NN
bit NN RB JJ
bitchy JJ
bite NN VB
bites VBZ NNS
biting VBG JJ
bitten VBN
bitter JJ
bitterest JJS
bitterness NN
bizarre JJ
blabs VBZ
black JJ NN
black-market NN
blacked VBN
blackened VBN
blackest JJS
blacklist VB
blacklisting NN
blackmail VB
blackmailed VBN
blacks NNS NNPS
blame VB NN VBP
blamed VBD VBN
blames VBZ
bland JJ
blandness NN
blank JJ NN
blanket NN VBP NN|JJ
blanketed VBD
blared VBD
blase NN JJ
blast NN VB
blasted VBD
blatant JJ
blaze VBP NN
bleak JJ
bled VBD
bleed VB
bleeding VBG NN
blend NN VB
blending VBG NN
bless VB
blessed VBN
blessing NN
blew VBD
blind JJ
blindfolded VBD JJ
blindness NN
blini NNS
blink NN VB
blinked VBD
blinking RB
blinks VBZ
blip NN VBP VB
block VB NN JJ VBP
blockbuster NN JJ
blocked VBN VBD
blocks NNS VBZ
blond JJ
blonde JJ
blood-cell NN
blood-clot NN
blood-letting NN
blood-red NN
bloodied VBN
bloody JJ
blossomed VBN VBD
blow NN VB
blow-up NN
blown VBN
bludgeon VB
bludgeoned VBN
blue JJ NN
blue-chips NNS
bluechip JJ
bluest JJS
bluesy JJ
bluish JJ
blunder NN VB
blundered VBD
blunt VB JJ
blunted VBN VBD
blur VB
blurred VBD
blurry JJ
blurt VBP
board NN VB
boast VB VBP NN
boasted VBD VBN
boasts VBZ
bode VB
bodes VBZ
bog VB
bogged VBD
boil VB NN
boiled VBD
boiler-room NN
boils VBZ
bold JJ
bolder JJR
boldest JJS
bolster VB
bolstered VBN VBD
bolsters VBZ
bolted VBN
bomb NN VB
bombarded VBD VBN
bombed VBN VBD
bombing NN
bon FW
bona JJ
bond-holders NNS
bond-trading JJ NN
bonded VBN
bonding NN
bone-marrow NN
boned VBN
bono FW
bonus NN
booby JJ
booed VBD
book NN VB
book-publishing NN
book-to-bill NN
booked VBN VBD
booking NN VBG
bookkeeping NN
books NNS NN|POS
boom NN VB
boomed VBD VBN
booming JJ VBG
boorish JJ
boost VB NN VBP
boosted VBD VBN
boosts VBZ NNS
bootlegged VBN
bordered VBN
bore VBD NN
bored VBN JJ
boring JJ VBG NN
born VBN
borne VBN
borrow VB VBP
borrowed VBN VBD JJ
borrowing NN VBG VBG|NN
borrows VBZ
boss NN
botched VBN JJ
both DT CC PDT CD
bother VB VBP
bothered VBN VBD
bothersome JJ
bottle NN VB
bottled JJ VBN
bottled-water NN
bottling VBG NN
bottom NN JJ VB
bottomed VBN VBD
bought VBD VBN
bounce VB NN VBP
bounced VBD
bounces VBZ NNS
bound VBN JJ
boundary NN
bounds NNS VBZ
boutique-store NN
bovine JJ
bow VB NN VBP
bowed VBD VBN
bowl NN VBP
bowling NN VBG
bowls VBZ
box-office NN
boxy JJ
boy NN UH
boycott NN VB
boycotted VBN
boyish JJ
brace VB
braced VBN VBD
brag VB
bragging NN
brags VBZ
brah FW
branch NN VB
branch-by-branch RB
branched VBN
brand-name JJ NN
brandished VBD
brands NNS VBZ
brash JJ
brass NN
brave JJ VB
braved VBD
bravest JJS
brawny JJ
brazen VB
breach NN VB
breached VBD VBN
breaded VBN
break VB NN VBP
break-down NN
break-even JJ NN
break-up NN
breaking VBG NN JJ
breakneck JJ
breaks NNS VBZ
breast-cancer NN
breathe VB
breathed VBD
breathing VBG NN
breathtaking JJ
breathy JJ
bred VBN VBD
breed NN VB VBP
breeding VBG NN
breezier JJR
breezy JJ
brethren NNS
brew NN VB
brewed VBN
brewing NN VBG
bribe NN VB
bribed VBD VBN
bridge NN JJ VB
brief JJ NN VB
briefed VBN VBD
briefing NN
briefly NN RB
bright JJ
brightened VBD VBN
brighter JJR
brightest JJS
brilliant JJ
brimmed VBD
bring VB VBP
bringing VBG NN
brings VBZ
brisk JJ
brisker JJR
bristle VBP
bristled VBD
bristles VBZ
brittle JJ
broad JJ
broadcast NN VBN VB VBD
broadcasting NN VBG
broadcasts NNS VBZ
broaden VB
broadened VBD VBN
broadens VBZ
broader JJR
broadest JJS
broke VBD RB JJ
broken VBN JJ
broker-dealer JJ NN|JJ NN
broker-dealers NNS
brokerage-house NN
brokered JJ VBD
brokering VBG NN
brother-in-law NN
brotherly JJ
brought VBN VBD
brow-beating NN
browbeat VB
brown JJ
browse VB
browsing VBG NN
bruddah FW
bruised VBN
bruising JJ VBG
brush NN VB
brushed VBD VBN
brutal JJ
brute JJ
brutish JJ
bubble NN VB
bubblelike JJ
buck NN VBP VB
bucked VBD VBN
buckle VB NN
buckled JJ VBD
bucks NNS VBZ
budding VBG JJ
budge VB
budged VBN VBD
budget-cutting NN
budgeted VBN
budgeting NN
buffer NN VB
buffet NN VB
buffeted VBN
buffetting NN
bugged VBN
bugging NN
buglike JJ
build VB VBP VBN
build-up NN
building NN VBG
building-materials NNS
building-products NNS
builds VBZ
built VBN VBD
built-in JJ NN
bulk NN JJ
bulk-chemical JJ NN|JJ
bulk-mail NN
bulky JJ
bull-market NN
bulldozed VBN
bullied VBD
bullies VBZ
bullish JJ
bullishness NN
bully NN
bumble VB VBP
bump NN VB
bumped VBN VBD
bumpy JJ
bundled VBN
bungled VBN
bunko-forgery NN
buoy VB
buoyant JJ
buoyed VBN VBD
buoys VBZ
burbles VBZ
burden-sharing NN
burdened VBN VBD
burdens NNS VBZ
burdensome JJ
bureaus NN NNS
burglarized VBN
burglary NN
buried VBN VBD
burlesque JJ
burly JJ
burn VB VBP
burned VBN VBD JJ
burning NN VBG
burns NNS VBZ
burnt JJ VBN
burst NN VBP VBD
bursts NNS VBZ
bury VB VBP
bus NN
bushy JJ
busier JJR
busiest JJS
business NN
business-communications NNS
business-judgment NN
business-machines NNS
business-partners NNS
business-to-business NN JJ
businesslike JJ
businessmen NNS
busted JJ VBN VBD
bustling JJ
busy JJ
but CC IN RB
butt NN VB
butterfly NN
buttress VB
buttressed VBN
buttresses VBZ
buy VB VBP NN JJ VB|NN
buy-and-hold JJ CD
buy-back NN JJ VB
buy-backs NNS
buy-out NN JJ
buy-outs NNS
buy\/hold JJ
buyback NN JJ
buying VBG NN JJ
buys VBZ NNS
buzz NN VB JJ
buzzes VBZ
by IN RB RP
bygone JJ
bypass VB NN
byzantine JJ
c SYM NN LS
c-Yields NNS
c.i.f JJ
ca MD
cabin-crew NNS
cable NN
cable-TV NN
cable-TV-system NN
cable-television NN
cadge VBP
caked VBD
calculate VB VBP
calculated VBN JJ VBD
calculates VBZ
calibrated VBN
call NN VB VBP JJ
called VBN VBD VB
calling VBG NN
callipygous NN
calls VBZ NNS
calm VB JJ NN
calmed VBN
calmer JJR
calming JJ VBG
calmness NN
came VBD
camouflaged VBN
campaign NN VB
campaigned VBN
campaigning NN VBG
camped VBD
campus NN
can MD NN
cancel VB NN
canceled VBN VBD VBN|JJ JJ
cancels VBZ
cancer-suppressors NNS
candid JJ
canine JJ
canned JJ VBN
canning NN VBG
cannot MD
canny JJ
cant MD
cantonal JJ
canvas NN
canvassed VBN
cap NN VBP VB
capacity-expansion JJ NN
capita NN NNS
capital NN JJ
capital-assets NNS
capital-draining VBG
capital-formation NN
capital-gains NNS JJ NN
capital-goods NNS
capital-improvement NN
capital-punishment NN
capital-spending JJ NN
capital-to-asset JJ NN
capital-to-assets NNS
capitalist JJ NN
capitalize VB
capitalized VBN JJ VBD
capitulated VBD
capped VBD VBN JJ
capriciousness NN
captain NN VBP
captioned VBD
captivating JJ VBG
captive NN JJ
capture VB NN
captured VBN VBN|JJ VBD
car-dealers NNS
car-development NN
car-leasing NN
car-market NN
carbide-products NNS
carbon-dioxide NN
carcass NN
card-member NN
cardiac JJ
cardiovascular JJ
care NN VB VBP
cared VBD VBN
careen VB
careened VBD
carefree JJ
cares VBZ
caricature VB
caring VBG NN JJ
carp NN VBP
carpeted VBD
carpeting NN
carping NN
carried VBD VBN
carries VBZ
carry VB VBP NN
carry-forward NN
carry-forwards NNS
carrying VBG NN
cart NN VBP
carted VBD
carve VBP VB
carved VBN VBD
carves VBZ
cascaded VBD
cascading VBG JJ
cases NNS VBZ
cash NN VB
cash-flow JJ NN
cash-squeeze NN
cash-up-front NN
cashed VBN VBD
casino-company NN
cast NN VBD VBN VB
cast-iron NN JJ
castigate VB
castigated VBN
casting VBG NN
castlelike JJ
castor-oil NN
casts VBZ
casual JJ
catalog-clothing-merchandiser NN
catapult VB VBP
catastrophic-care NN
catastrophic-illness NN JJ
catbird JJ
catch VB NN VBP
catch-up NN
catches VBZ
categorized VBN
cater VB VBP
catered VBD
catering NN VBG
caters VBZ
catharsis NN
cathode-ray NN
cattle NNS
caught VBN VBD
cause VB NN VBP
caused VBN VBD
causes NNS VBZ
caution NN VBP VB
cautioned VBD
cautions VBZ
cautiousness NN
cavalier JJ
cave-in NN
caved VBD
cease VB VBP
cease-fire NN
ceased VBD VBN
ceases VBZ
cede VB
ceded VBN VBD
ceiling NN
celebrate VB VBP
celebrated JJ VBD
celebrates VBZ
cellular JJ
cellular-phone NN
cellular-telephone JJ NN
cement NN VB
cement-makers NNS
cemented VBN
censor VBP
censored VBN
censured VBD
census NN
centennial NN JJ
center NN JJ VBP RB
center-aisle NN
centered VBN VBD
centers NNS VBZ
central JJ NN
centralize VB
centralized VBN JJ
centrifugal JJ
centrist JJ
cerebral JJ
ceremonial JJ
certain JJ
certificate-of-need NN
certified VBN JJ
certify VB
chafe VBP
chafed VBN
chain NN VBP
chain-smoking NN
chaired VBN VBD
chairman-elect NN
chairmen NNS
chairs NNS VBZ
chalked VBN
challenge NN VB VBP
challenged VBN VBD
challenges NNS VBZ
challenging VBG JJ
champion NN VBP JJ
championed VBD VBN
chance NN VBP
change NN VB VBP
change-ringing NN
changed VBN VBD JJ
changes NNS VBZ
changing VBG JJ NN
channel NN VB VBP
channeled VBD
chanted VBD VBN
chaos NN
character-recognition NN
characteristic JJ NN
characterize VB VBP
characterized VBN VBD
characterizes VBZ
charge NN VBP VB
charge-offs NNS
charged VBN VBD JJ
charges NNS VBZ
charging VBG NN
charming JJ
charred VBN
chart NN VB VBP
charter NN JJ
chartered JJ VBN VBD
charts NNS VBZ
chase NN JJ VB
chased VBD
chasing VBG NN
chassis NN NNS
chaste JJ
chastened VBN VBD
chastised VBN VBD
chastises VBZ
chat VB
chauffeur NN VB
cheap JJ NN RB
cheapens VBZ
cheaper JJR RBR
cheapest JJS
cheat VB VBP
cheated VBD JJ
cheating NN VBG
check NN VB VBP
checked VBN VBD
checking NN VBG
checks NNS VBZ
cheek-to-jowl RB
cheeky JJ
cheer NN VB
cheered VBD VBN
cheerleading NN
cheery JJ
cheesy JJ
chemical NN JJ
chemical-industry NN
chemical-weapons NNS
chemicals-industry NN
chemist-turned-entrepreneur NN
cherished VBN JJ
cherishes VBZ
cherry JJ NN
chess NN
chew VB VBP
chewed VBD
chicago NNP
chided VBN VBD
chides VBZ
chief JJ NN
child-as-required-yuppie-possession NN
child-care JJ NN
child-development NN
childish JJ
children NNS
chill NN VB
chilled VBN
chilling JJ VBG
chilly JJ
chimes VBZ
chipped VBN
chirpy JJ
chisel VB
chocolate NN JJ
choice NN JJ
choke VB
choked VBD VBN
choose VB VBP
chooses VBZ
choosing VBG NN
chop VB
chopped VBN
chopping VBG NN
choppy JJ
chortled VBD
chorus NN
chose VBD
chosen VBN JJ
chronic JJ NN
chronicles VBZ
chucked VBD
chuckles VBZ NNS
chug VBP
church-goers NNS
churn VBP VB
cinch VB
circled VBD
circles NNS VBZ
circuit-board NN
circuit-breaker NN
circular JJ
circulate VB VBP
circulated VBD VBN
circumspect JJ
circumstantial JJ
circumvent VB
circumvents VBZ
circus NN
cite VBP VB
cited VBD VBN
cites VBZ
citywide JJ
civil JJ
civil-rights NNS
civilian JJ
clad JJ VBN
claim NN VBP VB
claimed VBD VBN
claims NNS VBZ
claims-processing NN
clambered VBD
clammy JJ
clamored VBD
clamp VB NN
clamped VBN
clandestine JJ
clanging VBG NN
clannish JJ
clarified VBN
clarifies VBZ
clarify VB
clash NN VB
clashed VBN VBD
class NN
class-action JJ NN
classed VBN
classic JJ NN
classified VBN JJ VBD
classified-ad NN
classifies VBZ
classify VB
classy JJ
clean VB JJ
clean-air JJ NN
clean-fuels NNS
cleaned VBN VBD
cleaner JJR NN
cleaning VBG NN
cleanliness NN
cleans VBZ
cleanse VB
cleansed VBD VBN
cleansing VBG NN
clear JJ VB RB VBP
cleared VBD VBN
clearer JJR
clearing NN VBG
clears VBZ
clergy NNS
clerical JJ NN
clever JJ
clicked VBD
clientele NNS NN
climb NN VB
climbed VBD VBN
climbs VBZ
clinched VBD
cling VB VBP
clingy JJ
clinic NN
clinical-products NNS
clip VB NN
clipped VBD VBN
cloak NN VBP
clobber VB
clobbered VBN VBD
clocked VBN
clocks NNS VBZ
clogged VBN JJ
cloned VBN
close VB NN JJ RB VBP
close-up NN
closed VBD VBN JJ VBN|VBD
closeness NN
closer JJR RBR RB
closes VBZ NNS
closest JJS
closing NN VBG JJ VBG|NN
clothed VBN
clothing NN
cloud NN VB VBP
clouded JJ VBN
clouding NN
clouds NNS VBZ
cloudy JJ
clubbed VBD
clumsy JJ
clunky JJ
clustered VBN
clutch NN VBP
clutter NN VB
cluttered VBN JJ
co-anchored VBN
co-author NN
co-authored VBN
co-chairman NN
co-chairmen NNS
co-chief JJ NN
co-defendant NN
co-defendants NNS
co-developers NNS
co-editor NN
co-edits VBZ
co-exist VB
co-existence NN
co-founded VBD
co-founder NN
co-founders NNS
co-head NN
co-hero NN
co-host VB
co-managed VBN
co-manager NN
co-managing JJ VBG
co-op NN
co-owner NN
co-payments NNS
co-pilot NNS
co-presidents NNS
co-produce VB
co-production NN
co-publisher NN
co-sponsor NN VB
co-sponsored JJ VBN
co-sponsors NNS
co-venture NN
co-workers NNS
coaching NN
coarse JJ
coastal JJ
coasted VBD
coated JJ VBN
coating NN
coax VB
cobbled VBN VBD
cockiness NN
cocky JJ
cod-liver NN
coddled VBN
coddling NN
code NN VB
code-named NNP JJ
coded VBN
codified VBN
coed NN
coerces VBZ
coextrude VBP
cogeneration-plant NN
cognoscenti NNS
cohere VB
coherent JJ
coincide VB
coincided VBD
coincident JJ
coincidental JJ
coincides VBZ
coined VBN
cold JJ NN
cold-cuts NNS
colder JJR
coli NNS
collaborate VB VBP
collaborated VBD
collapse NN VB
collapsed VBD VBN JJ
collapses VBZ NNS
collateral NN JJ
collateralized JJ VBN
collect VB VBP JJ
collected VBN VBD
collecting VBG NN
collects VBZ
college-bowl NN
college-sports NNS JJ
collegial JJ
collegiate JJ
collision-damage NN
colon-cancer NN
colonial NN JJ
color NN JJ VB
color-coded VBN
color-coding VBG
color-television NN
colored VBN
coloured VBN
colorlessness NN
colossus NN
combat NN VB
combed VBN
combine VB VBP
combined VBN JJ VBD
combines VBZ NNS
come VB VBN VBP VBD
comes VBZ
comforted VBN
comforting JJ VBG
comic JJ NN
coming VBG JJ
command NN VB VBP
commanded VBN
commanding JJ VBG
commemorate VBP VB
commemorated VBD
commemorative JJ NN
commenced VBD
commend VB
commends VBZ
commensurate JJ
comment VB NN
commentary NN
commented VBD
comments NNS VBZ
commercial JJ NN
commercial-credit NN
commercialize VB
commissioned VBN VBD
commissions NNS VBZ
commit VB VBP
commits VBZ
committed VBN JJ VBD
committees NNS VBZ
commmon JJ
commoditize VB
common JJ NN
common-carrier NN
common-law NN
common-sense JJ NN
commonplace JJ NN
communal JJ
communicate VB
communicated VBN VBD
communications NNS NN
communist NN JJ
community-development NN
compact JJ NN
compact-car NN
compacted JJ VBN
companion NN JJ
compare VB VBP
compared VBN VBD
compares VBZ
compel VB
compelled VBN
compelling JJ
compels VBZ
compensate VB
compensated VBN
compensates VBZ
compensatory JJ
compete VB VBP
competed VBN VBD
competent JJ
competes VBZ
competing VBG JJ VBG|JJ
competitiveness NN
competitve JJ
compile VB
compiled VBN
compiles VBZ
complacent JJ
complain VBP VB
complained VBD VBN
complains VBZ
complaint-resolution NN
complement VB
complements VBZ
complete JJ VB
completed VBN VBD JJ
completeness NN
completes VBZ
complex JJ NN
complicate VB
complicated VBN JJ IN VBD
complicates VBZ
complied VBN VBD
compliment NN VBP
comply VB
composed VBN
composite JJ NN
compositional JJ
composting NN
compound NN JJ VB
compounded VBN VBD
compounding NN VBG
comprehensiveness NN
compressed VBN
comprise VBP VB
comprised VBN
comprises VBZ
compromise NN VB JJ
compromised VBN
compromises NNS VBZ
compulsory JJ
compute VB
computer-assembly NN
computer-chip NN JJ
computer-maintenance NN JJ
computer-network NN
computer-printer NN
computer-products NNS
computer-science NN
computer-services NNS
computer-servicing JJ NN
computer-software NN
computer-systems NNS
computerize VB
computerized JJ VBN NN
computes VBZ
computing NN VBG
con JJ NN RB VB
conceal VB
concealed VBN
concede VBP VB
conceded VBD VBN
concedes VBZ
conceive VB
conceived VBD VBN JJ
concentrate VB NN VBP
concentrated VBN JJ VBD
concentrates VBZ
conceptual JJ
concern NN VB
concerned VBN JJ VBD
concerns NNS VBZ
conciliatory JJ
conclude VB VBP
concluded VBD VBN
concludes VBZ
concocted VBN
concomitant NN JJ
concrete JJ NN
concur VB
concurred VBD
concurrent JJ
condemn VB
condemned VBN VBD
condemns VBZ
conditional JJ
conditioned VBN
conditioning NN
condone VB
condoned VBD
conduct NN VB VBP
conducted VBN VBD
conducting VBG NN
conducts VBZ
confer VB VBP
conferred VBD
confers VBZ
confessed VBD VBN
confesses VBZ
confided VBD
confidence-crusher NN
confident JJ
confidential JJ
confides VBZ
confined VBN
confirm VB VBP
confirmed VBD VBN
confirms VBZ
confiscate VB
confiscated VBN VBD
conflict NN VBP
conflict-of-interest NN JJ
conflicted VBN
conflicting JJ VBG
conform VB VBP
conforms VBZ
confreres FW
confront VBP VB
confrontational JJ
confronted VBN
confronts VBZ
confuse VB
confused VBN JJ VBD
confuses VBZ
confusing JJ VBG
congenial JJ
conglomerate NN JJ
congratulate VB
congratulated VBD VBN
congratulating NN
congratulatory JJ
congress NN
congressional JJ
congressmen NNS
congressonal JJ
conjure VBP
conjures VBZ
connect VB VBP
connected VBN JJ
connects VBZ
connote VB
conquer VB
consciousness NN
conscript JJ
consensus NN
consent NN VB
consented VBD VBN
consentual JJ
consequent JJ
conservative JJ NN
conserve VB
consider VB VBP
considered VBN VBD JJ
considers VBZ
consigned VBN
consigns VBZ
consist VBP VB
consisted VBD VBN
consistent JJ
consists VBZ
console VB
consoles VBZ
consolidate VB
consolidated JJ VBN VBD
consolidates VBZ
consonant JJ
consortium-ownership NN
conspire VBP
conspired VBD
constant JJ
constituent NN JJ
constitute VBP VB
constituted VBD
constitutes VBZ
constitutional JJ
constitutional-law NN
constrain VB
constrained VBN
constrains VBZ
construct VB
constructed VBN
construction-industry NN
construe VB VBP
construed VBN VBD
consult VB
consulted VBN
consulting NN VBG JJ
consulting-firm NN
consume VBP VB
consumed VBN VBD
consumer-electronics JJ NNS
consumer-goods NNS
consumer-price JJ NN
consumer-product NN
consumer-products NNS JJ
consuming NN
consummate JJ
consummated VBN
cont'd. VBN
contact NN VB
contacted VBN VBD
contain VB VBP
contained VBD VBN JJ
container-ship NN
containerized-cargo NN
contains VBZ
contaminated JJ VBN
contemplate VB VBP
contemplated VBN JJ VBD
contemplates VBZ
contemporize VB
contend VBP VB
contended VBD VBN
contends VBZ
content NN JJ VB
contest NN VB
contested VBN VBD JJ
continental JJ
contingent JJ NN
continual JJ
continue VB VBP
continued VBD VBN JJ
continues VBZ
continuing VBG JJ
contraceptive JJ NN
contract NN VB VBP
contract-drilling NN VBG
contracted VBD VBN
contracting NN VBG
contracts NNS VBZ NN
contractual JJ
contradict VB
contradictory JJ NN
contradicts VBZ
contrarian JJ
contrary JJ NN
contrast NN VBP VB
contrasted VBN VBD
contrasts VBZ
contravened VBN
contribued VBD
contribute VB VBP
contributed VBD VBN
contributes VBZ
contributing VBG JJ
control NN VB VBP JJ
control-room NN
controlled VBN VBD JJ
controlling VBG JJ NN
controls NNS VBZ
controversial JJ
convene VB VBP
convened VBD VBN
convenes VBZ
convenience-food NN
convenience-store NN
convenient JJ
convention-goers NNS
conventional JJ
conventional-arms JJ NNS
converged VBD
convert VB VBP
converted VBN VBD JJ
convertible JJ NN
converts VBZ NNS
convey VB VBP
conveyed VBD
conveys VBZ
convict VB
convicted VBN VBD
convince VB VBP
convinced VBN JJ VBN|JJ VBD
convinces VBZ
convincing JJ VBG NN
convoluted JJ VBN
cook NN VB
cooked VBN
cooking NN VBG JJ
cool VB JJ NN VBP
cooled VBN VBD
cooler JJR NN
cooling VBG NN
cools VBZ
cooperate VB VBP
cooperated VBD VBN
cooperative JJ NN
coordinate VB
coordinated VBN
coordinates VBZ
cope VB
copied VBN VBD
copy NN VB VBP
copying NN VBG
copyright NN JJ
copyrighted VBN
core NN JJ
corinthian JJ
corneal JJ
corner NN VB JJ
cornered VBN JJ
corporate JJ
corporate-earnings NNS
corporate-finance JJ NN
corporatewide JJ
corps NN FW
corpus NN
corral VB
correct JJ VB VBP
corrected VBN VBD JJ
corrects VBZ
correlate VBP
correspond VB
corresponded VBD
corresponding JJ
corroborate VBP
corrupt JJ
corrupting JJ
cosmetic JJ NN
cosmetics-industry NN
cosmopolitan JJ
cost NN VB VBD VBN VBP
cost-cutting JJ NN
cost-efficiency NN
cost-of-living JJ NN
cost-sharing NN JJ
costlier JJR
costliest JJS
costly JJ
costs NNS VBZ
costume JJ NN
costumed VBN
couched VBN
cough NN VB
coughed VBN VBD
could MD
counsel NN VB
counseled VBN
counseling NN VBG
counsels VBZ
count NN VB VBP
counted VBN VBD
countenance VB NN
counter VB RB NN VBP JJ
counter-argument NN
counter-claims NNS
counter-demand NN
counteract VB
counteracted VBN
counterattack NN VB
counterbalanced VBN
countercultural JJ
countered VBD VBN
counterprogram VB
counterrevolutionary JJ NN
countersued VBD VBN
countess NN
counting VBG NN
countrymen NNS
counts VBZ NNS
coup NN FW
coup-makers NNS
coup-planning NN
couple NN JJ
coupled VBN
coupling NN
couponing NN
course-correction NN
coursed VBN
court NN VB
courted VBN VBD
courts NNS VBZ
cover VB NN VBP
cover-up NN
covered VBN VBD JJ
covering VBG NN
covers VBZ NNS
covert JJ
coveted JJ VBN
covets VBZ
cowardly JJ
cower VBP
coy JJ
cozy JJ
crabby JJ
crack VB NN VBP
cracked VBN VBD
crackle VBP
craft NN VB
crafted VBN VBD
craftsmen NNS
crafty JJ
crammed VBD
crams VBZ
crane-safety NN
crank VB
cranked VBD VBN
crash NN VB JJ
crashed VBD
crashes NNS VBZ
crass JJ
crave VBP
craving NN
crawl VB NN
crawled VBD
crawls VBZ
crazee JJ
crazy JJ
creak VB
creamed VBN
creamier JJR
creamy JJ
create VB VBP
created VBN VBD
creates VBZ
creationist JJ
credit NN VBP VB
credit-backing NN
credit-card NN JJ
credit-data NN|NNS
credit-easing NN JJ
credit-information NN
credit-rating NN JJ
credit-ratings NNS
credit-softening NN
credit-worthiness NN
credited VBN VBD
crediting VBG NN
credits NNS VBZ
creditworthiness NN
creed NN
creepiest JJS
crept VBD VBN
crest NN VB
crew-rest NN
crib NN JJ
cries VBZ
criminal JJ NN
criminal-justice NN
criminal-law NN
criminalize VB
crimp VB
crimson JJ
cringed VBD
cripple-maker NN
crippled VBN JJ
crippling JJ VBG
crisis NN
crisis-management NN
crisp JJ
criss-cross VBP
criteria NNS
critic NN
criticize VB VBP
criticized VBN VBD
criticizes VBZ
croak VBP
crooned VBD
croons VBZ
crop NN VB
cropped VBN VBD
cross NN VB VBP JJ
cross-licensing NN
cross-margining NN
cross-ownership NN
cross-pollinated VBN
cross-pollination NN
cross-section NN
cross-shareholdings NNS
crossed VBN VBD
crosses VBZ
crotchety JJ
crouched VBD
crowd NN VBP
crowded VBN JJ VBD
crowds NNS VBZ
crowed VBN
crowned VBN
crowning JJ
crows VBZ
crucial JJ
crucible NN
crude NN JJ
crude-oil NN JJ
crude-steel NN
crudest JJS
cruel JJ
cruise NN VBP
cruise-ship NN
crumble VB
crumbled VBD VBN
crumbles VBZ
crumpled VBN VBD JJ
crunched VBD
crunchier JJR
crush NN VB
crushed VBN JJ
crushes VBZ
crusty JJ
cry NN VBP VB
crystal-lattice JJ NN
crystalline JJ
cuff VB
culled VBN
culminated VBN VBD
culminates VBZ
cultivated VBN
cultivates VBZ
cultural JJ
cultural-reform NN
cumbersome JJ
cunning JJ
curb VB NN
curbed VBN VBD
cure VB NN
cured VBN
curl VB
curled VBD
curly JJ
current JJ NN
curry VB
cursed VBD
cursing NN
curtail VB VBP
curtailed VBN VBD
curtness NN
curvy JJ
cushion NN VB
cushioned VBN
cushioning NN VBG
custodial JJ
custom-die NN
customized VBN JJ
customs-clearance NN
cut VB NN VBN VBD VBP JJ
cute JJ
cuts NNS VBZ
cutthroat JJ
cutting VBG NN VBG|NN JJ
cutting-tools NNS
cycling NN VBG
cyclosporine NN JJ
d SYM LS
d'Administration NNP
d'Alene NNP
d'Amiante NNP
d'Exploitation NNP
d'Harnoncourt NNP
d'Ulisse FW
d'etre FW
da NNP NN
dabble VB
dabbled VBD
dabs VBZ
daily JJ RB NN
damage NN VB VBP
damaged VBN JJ VBD
damages NNS VBZ
damaging JJ VBG
damn RB UH NN JJ
damned RB
damp VB JJ VBP
damped VBN VBP
dampen VB
dampened VBD
dance NN VB
dancing NN VBG
dandy JJ
dangled VBN
dangling VBG JJ
dapper JJ
dare VB VBP MD
dared VBD
daring JJ
dark JJ NN
darker JJR
darling NN
darned RB
dart-throwing NN
darts NN
dash NN VB
dashed VBN VBD
data NNS NN NN|NNS NNS|NN
data-processing NN JJ
data-storage JJ NN
data-transmission NN
date NN VBP VB
dated VBN JJ
dates NNS VBZ
daunted VBD
daunting JJ VBG
dawns VBZ
day-care NN JJ
days NNS NN
days. NN NNS
daytime JJ
dazzled VBN
dazzling JJ
de NNP FW IN JJ
de-emphasize VB
de-emphasized VBN
de-linkage NN
de-stocking NN
deactivates VBZ
dead JJ NN RB VBN
deadliest JJS
deadlocked VBN JJ
deadly JJ
deaf JJ
deal NN VB VBP
deal-making NN
dealer-manager NN
dealing VBG NN
deals NNS VBZ
dealt VBN VBD
dear RB
death-penalty NN JJ
death-row NN
death-sentence NN
debate NN VB
debated VBN
debilitating JJ
debris NN
debt-equity JJ NN
debt-for-environment NN
debt-limit NN
debt-reduction NN
debtor NN JJ
debunk VB
debut NN VB
debuted VBD
decadent JJ
decapitalize VBP
deceased JJ VBN
deceive VB
deceived VBD VBN
decelerated VBN
decent JJ
decentralized JJ VBN
decertified VBN
decide VB VBP
decided VBD VBN
decides VBZ
deciding VBG JJ
decimal JJ NN
decimated VBN
decision-makers NNS
decision-making NN JJ
decisiveness NN
decked VBN
declaratory JJ
declare VB VBP
declared VBD VBN
declares VBZ
declasse JJ
decline NN VB VBP
declined VBD VBN
declines NNS VBZ
declining VBG JJ NN
decontaminated VBN
decorated VBN
decrease VB NN VBP
decreased VBD VBN
decreases NNS VBZ
decreed VBN
decribed VBD
decried VBD
decries VBZ
dedicated VBN JJ VBD
deduces VBZ
deduct VB
deducted VBN
deem VBP
deemed VBN VBD
deems VBZ
deep JJ RB
deepened VBD
deeper JJR RBR
deepest JJS
deer NNS
defamatory JJ
default NN VB
defaulted VBD VBN JJ
defeat NN VB
defeated VBN VBD
defeats VBZ NNS
defect NN VB
defected VBD
defend VB VBP
defended VBD VBN
defends VBZ
defense-electronics JJ NNS
defense-procurement NN
defense-suppression NN
defensive JJ NN
defensiveness NN
defer VB
deferred VBN JJ
deficit-cutting JJ NN
deficit-reduction NN JJ
deficitcutting NN
defied VBD
defies VBZ
define VB
defined VBN VBD
defines VBZ
definite JJ
deflate VB
deflated VBN VBD
deflect VB
deflected VBD
deformed VBN
defraud VB
defrauded VBD VBN
defunct JJ VB
defuse VB
defy VBP
degenerate VB
degenerated VBD VBN
degrading JJ
dei FW
del FW DT NNP
delay NN VB VBP
delayed VBN VBD JJ
delaying VBG NN|VBG
delays NNS VBZ
delegate NN VB
delete VB
deleted VBN
deli NNS
deliberate JJ VB
delicate JJ
delight NN VB
delighted JJ VBN VBD
delights VBZ
delinquent JJ
delisted VBN
delisting NN
deliver VB VBP
delivered VBN VBD
deliveries NNS NN
delivers VBZ
delta NN JJ
deluged VBN VBD
deluxe JJ
delved VBN
delves VBZ
delving NN
demand NN VB VBP
demanded VBD VBN
demanding VBG JJ
demands NNS VBZ
demeaned VBN
demeaning JJ
demilitarize VB
demobilize VB
democratize VB
democratized VBN
demolish VB
demolished VBN VBD
demonized VBN
demonizing NN
demonstrate VB VBP
demonstrated VBN VBD
demonstrates VBZ
demonstrativeness NN
demoted VBN
demurs VBZ
denationalized VBN
denied VBD VBN
denies VBZ
denominated VBN
denounce VBP VB
denounced VBD VBN
dense JJ
dental JJ
denuclearized VBN
denude VB
deny VB VBP
depart VB VBP
departed VBD
department-store NN JJ
depend VB VBP
depended VBD VBN
dependent JJ
depends VBZ
depict VB VBP
depicted VBN
depicts VBZ
deplete VB
depleted VBN VBD
depletes VBZ
deplores VBZ
deployed VBN VBD
deported VBD
deposed VBN
deposit NN VB
depositary JJ NN NN|JJ
deposited VBN VBD
depository NN JJ
deposits NNS VBZ
depreciated VBD
depress VB VBP
depressed VBN JJ VBD
depresses VBZ
depressing JJ VBG
deprive VB
deprived VBN VBN|JJ VBD
deprives VBZ
deputy NN JJ
der NN JJR NNP
derail VB
derailed VBN
deregulate VB
deregulated VBN
derided VBN VBD
derivative JJ NN
derive VB
derived VBN VBD
derives VBZ
derogatory JJ
derring-do NN
des NNP FW
descended VBD
descends VBZ
describe VB VBP
described VBD VBN
describes VBZ
desert NN VB
deserted VBN
deserve VBP VB
deserved VBD
deserves VBZ
deserving JJ
design NN VB
designate JJ VB
designated VBN
designates VBZ
designed VBN VBD
designs NNS VBZ
desire NN VBP
desired VBN VBD
desist VB
desktop NN JJ
desolate JJ
despairing JJ
despairs VBZ
desperate JJ
despise VB
despised VBN
despite IN
dessert-menu NN
destabilize VB
destabilizing JJ VBG
destined VBN
destitute JJ
destroy VB VBP
destroyed VBN VBD
destroys VBZ
desultory JJ
detached VBN
detailed JJ VBN
detained VBD VBN
detect VB VBP
detected VBD VBN
detective NN
detective-story NN
deter VB VBP
deteriorate VB VBP
deteriorated VBN VBD JJ
deteriorates VBZ
deteriorating VBG JJ
determine VB VBP
determined VBN VBD JJ
determines VBZ
deterrant JJ
deterred VBD
deters VBZ
detests VBZ
dethroned VBN
detract VB
detracts VBZ
detrimental JJ
deux FW
devalued VBN VBD
devastated VBN JJ VBD
devastating JJ VBG
develop VB VBP
developed VBN VBD JJ
developing VBG JJ NN
develops VBZ
deviant JJ
deviated VBD
devise VB VBP
devised VBN VBD
devises VBZ
devoid JJ
devote VB VBP
devoted VBN JJ VBD
devotes VBZ
devotional JJ
devoured VBN
devout JJ
di FW NNP
diGenova NNP
diabetes NN
diagnosed VBN VBD
diagnosis NN
dial NN VB
dial-tone NN
dialing VBG NN
dialysis NN
diary NN
dice NNS
dickered VBD
dickering NN
dictate VBP VB
dictated VBN VBD
dictates VBZ
dictating NN
dictatorial JJ
did VBD
didnt VBD
die VB VBP NN
die-hards NNS
died VBD VBN
dies VBZ
diesel NN JJ
dieting NN
differ VB VBP
differed VBD
different JJ
differential NN JJ
differentiate VB
differs VBZ
difficult JJ
dig NN VB
digest VB
digested VBN
digging NN VBG
digital JJ
dignify VB
digs VBZ NNS
dilute VB
diluted VBN JJ VBD VBN|JJ
diming NN
diminish VB VBP
diminished VBN JJ VBD
diminishes VBZ
dined VBN VBD
dining NN VBG
dinkiest JJS
dip VB NN
dipped VBD VBN
dire JJ FW
direct JJ VB RB
direct-mail JJ NN
direct-mail-mogul NN
direct-marketing NN
direct-seller NN
direct-steelmaking NN
directed VBN VBD
directing VBG NN
directive NN
director-general NN
directorial JJ
directs VBZ
dirtiest JJS
dirty JJ
disabled JJ VBN
disabled-workers NNS
disagree VBP VB
disagreed VBD VBN
disagrees VBZ
disallowed VBD
disappear VB VBP
disappeared VBD VBN
disappears VBZ
disappoint VB
disappointed VBN JJ VBD
disappointing JJ
disapprove VBP
disapproved VBN VBD
disapproves VBZ
disapproving JJ
disarm VB
disassemble VB
disassociate VB
disaster-contingency NN
disaster-recovery NN JJ
disavowed VBD
disband VB
disbanded VBN
disbanding VBG NN
disbursed VBN
discard VB
discarded VBN VBD
discern VB
discerning JJ
discerns VBZ
discharge NN VB
discharged VBN
disciplined VBN JJ VBD
disclaims VBZ
disclose VB
disclosed VBN VBD JJ
discloses VBZ
discolored VBN
discomfit VB
disconnect VB
disconnected VBN JJ
discontinue VB
discontinued VBN JJ
discordant JJ
discount NN JJ VB
discount-borrowing NN
discount-coupon NN
discount-retailing NN
discounted VBN VBD JJ
discounting NN VBG
discounts NNS VBZ
discourage VB VBP
discouraged VBN VBD JJ
discourages VBZ
discouraging VBG JJ
discover VB VBP
discovered VBN VBD
discovers VBZ
discredit VB
discredited VBN JJ
discrediting NN
discreet JJ
discrete JJ
discriminate JJ
discriminatory JJ
discuss VB VBP
discussed VBN VBD
disdain NN VB
disembark VBP
disenchanted JJ VBN
disengage VB
disgorge VB
disgruntled JJ VBN
disguise VB
disguised VBN JJ
disgusted JJ VBN
disgusting JJ
dish NN VB
dishonest JJ
disinclined VBN JJ
disintegrated VBD
disk-drive NN
dislike NN VBP VB
dislikes NN VBZ
disloyal JJ
dismal JJ
dismantle VB
dismantled VBN
dismayed JJ VBN
dismaying JJ
dismember VB
dismiss VB VBP
dismissed VBD VBN
dismisses VBZ
disobey VB
disorderly JJ
disparage VB
disparaged VBD
disparate JJ
dispatch VB NN
dispatched VBD VBN
dispel VB
dispelled VBD
dispense VB VBP
dispensed VBD
dispersed VBD
displace VB
displaced VBN
displacing NN
display NN VB VBP
displayed VBN VBD
displays NNS VBZ
displeases VBZ
dispose VB
disposed VBN JJ VBD
disposes VBZ
disproportionate JJ
disprove VB
dispute NN VBP VB
disputed VBN VBD JJ
disputes NNS VBZ
disqualified VBN
disqualify VB
disquieting JJ
disregard NN VB
disregarded VBD
disrupt VB
disrupted VBN VBD
dissatisfied JJ VBN
dissected VBN
disseminate VB
disseminated VBN
dissented VBN VBD
dissenting JJ
dissident JJ NN
dissident-shareholder NN
dissimilar JJ
dissipate VB
dissipated VBN
dissipates VBZ
dissociate VB
dissolve VB
dissolved VBN
dissolves VBZ
dissuade VB
distance NN VB
distancing VBG NN
distant JJ
distilled VBN JJ
distinct JJ
distinctiveness NN
distinguish VB
distinguished VBD JJ VBN
distort VB VBP
distorted JJ VBN
distorts VBZ
distract VB
distracted VBN VBD
distracting VBG JJ
distress NN
distressing JJ
distribute VB VBP
distributed VBN VBD
distributes VBZ
distributing VBG NN
district NN JJ
districting NN
disturb VB
disturbed VBN JJ
disturbing JJ VBG
disturbs VBZ
dive NN VBP VB
dived VBD
diverge VB
divergent JJ
diverse JJ
diversifed VBN
diversified JJ VBN
diversify VB
divert VB VBP
diverted VBN
dives VBZ
divest VB VBP
divested JJ VBD
divide VBP NN VB
divided VBN VBD JJ
divides VBZ
dividing VBG VBG|NN|JJ
diving JJ NN VBG
divisional JJ
divisiveness NN
divorced VBN VBD
divulge VB
divvied VBN
dizziness NN
dizzying JJ VBG
do VBP VB
do-gooders NNS
docile JJ
dock-siders NNS
doctor NN VB
doctoral JJ
doctoring NN
document NN VB
documentary NN JJ
documented VBN
documents NNS VBZ
doddering JJ
dodge VBP
dodged VBD
does VBZ
dog-meat NN
dogged VBN VBD JJ
dogs NNS VBZ
doi FW
dolce FW
doldrums NNS NN
dole VB VBP
doled VBD
dollar-cost NN
dollar-mark NN
dollar\/mark JJ
dolledup JJ
domestic JJ NN
domestic-production NN
dominant JJ
dominate VB VBP
dominated VBN VBD
dominates VBZ
dominating VBG JJ
domineering JJ
dominoes NN
don VB
donate VB VBP
donated VBN VBD
done VBN RB
donned VBD
dons VBZ NNS
doom NN VB
doomed VBN JJ VBD
doormen NNS
dormant JJ
dot VBP
doted VBN
doth VBZ
double JJ VB RB VBP
double-A JJ NNP
double-B-minus\/B NN
double-C NN
double-coupon NN
double-crossed VBD
double-decking NN
double-hamburger NN
doubled VBD VBN
doubles VBZ
doubling VBG NN
doubt NN VBP VB RB
doubted VBD
doubtless RB
doubts NNS VBZ
dove VBD
dovetails VBZ
dowdy JJ
down RB IN RP JJ NN RBR VBP IN|RB
down-payment NN
downbeat JJ NN
downed VBD
downgraded VBD VBN
downgrading NN VBG
downhill RB
downplayed VBD
downright RB JJ
downside NN JJ
downsize VB
downsized VBN
downsizing NN VBG
downstairs NN
downstream JJ
downtown NN JJ
downtrodden JJ
downward JJ RB
drab JJ
drachmas NN
draconian JJ
draft NN VB
drafted VBN VBD
draftsmen NNS
drag VB NN VBP
dragged VBN VBD
drags VBZ
drain NN VB
drained VBN
draining VBG NN
drains VBZ
dramas NN
drape VB NN
drastic JJ RB
draw VB VBP NN
drawing VBG NN
drawn VBN
draws VBZ NNS
dreaded VBN JJ
dream NN VBP VB
dreamed VBD VBN
dreams NNS VBZ
dreamt VBD
dreamy JJ
drearier RBR
drenching NN
dress NN VB VBP
dressed VBN VBD
dresses NNS VBZ
dressmaking NN
drew VBD
dribble NN
dried VBD VBN
drift VB NN VBP
drift-net NN
drifted VBD
drill VB NN
drill-bit NN
drilled VBN VBD
drilling NN VBG
drink NN VBP VB
drinking NN VBG
drive NN VB VBP
drive-train NN
driven VBN JJ
drives NNS VBZ
driving VBG NN JJ
drooled VBD
drop NN VB VBP
drop-off NN JJ
droped VBD
dropped VBD VBN
drops NNS VBZ
drove VBD
drown VB
drowned VBN JJ VBD
drubbing NN
drug-dealing NN
drug-industry NN
drug-interdiction NN JJ
drug-policy NN
drug-sales NNS
drug-store NN
drum VB
drumbeating NN
drunk JJ NN
drunken JJ
drunkenness NN
dry JJ VB
dryness NN
du NNP FW
dual JJ
dual-trading NN
dubbed VBN VBD
dubs VBZ
duck NN VB
duckling NN
ducks NNS VBZ
due JJ RB NN NNS
due-process NN
dueling NN VBG
dug VBD
dull JJ
dulled VBN
duller RBR
dullest JJS
dullish JJ
dullness NN
dumb JJ
dumber JJR
dumbest JJS
dummy JJ NN
dump VB VBP NN
dumped VBD VBN
dumps NNS VBZ
dune-grass NN
duodenal JJ
dupes VBZ
duplicate VB JJ
duplicated VBN
durable-goods NNS
during IN
dust-up NN
dusted VBD
dusty JJ
dwarf NN VB VBP
dwarfed VBN
dwarfs VBZ
dwelling NN
dwindled VBD
dyed VBN
dynamic JJ NN
e SYM LS NN
each DT
eager JJ
eagerness NN
earlier RBR RB JJR NN JJ
earlier-period NN
earliest JJS RBS
early JJ RB
early-morning JJ NN
earmark VB
earmarked VBN VBD
earn VB VBP
earned VBD VBN
earnest NN JJ
earning VBG NN
earnings NNS NN
earns VBZ
earring NN
earthbound JJ
earthly JJ
earthmoving JJ
earthshaking JJ
earthy JJ
ease VB NN VBP
eased VBD VBN
eases VBZ
easier JJR RBR RB
easiest JJS
easing VBG NN
east JJ RB
eastern JJ
eastward RB
easy JJ RB
easygoing JJ
eat VB VBP
eaten VBN
eating VBG NN JJ
eats VBZ
eavesdrop VB
eavesdropping NN
ebb NN VB
ebbs VBZ
ebullient JJ
echo VBP NN VB
echoed VBN VBD
eclectic JJ NN
eclipse VB
economic-development NN
economic-efficiency NN
economics NNS NN
economize VB
edge NN VB
edged VBD VBN
edginess NN
edgy JJ
edit VB
editing NN
editor-in-chief NN
editorial NN JJ
editorial-page NN JJ
educate VB
educated VBN
educational JJ
eerie JJ
eeriness NN
effect NN VB
effective JJ NN
effectiveness NN
effects NNS VBZ
effete JJ
efficient JJ
efficient-market NN
effluent JJ
egg-breaking NN
eight CD
eight-year-old JJ NN
eighth JJ NN
either CC DT RB
ejected VBN
eke VB
eked VBD
elaborate VB JJ
elapsed VBN
elder JJR
elderly JJ
eldest JJS
elect VB VBP
elected VBN VBD JJ
electoral JJ
electric JJ NN
electric-utility NN JJ
electrical-products NNS
electrified VBN
electro-optics NNS
electrogalvanized JJ VBN
electrolysis NN
electronic-data NN|NNS
electronic-systems NNS
electronic-warfare NN
electronics NNS NN
electronics-product NN
elegant JJ
elevated VBD JJ
elevates VBZ
eleven CD
eligible JJ NN
eliminate VB VBP
eliminated VBN VBD
eliminates VBZ
elite NN JJ NNS
elongate VB
eloquent JJ
else RB JJ NN
elsewhere RB NN
eluded VBD
emasculate VB
embargoed VBD JJ
embark VB
embarked VBD VBN
embarrass VB
embarrassed JJ VBN VBD
embarrassing JJ VBG
embattled JJ VBN
embedded VBN
embellish VB
embezzled VBD
embodied VBN
embodies VBZ
embody VBP
emboldened VBN
embrace VB
embraced VBN VBD
embraces VBZ
embroiled VBN
emerge VB VBP
emerged VBD VBN
emergency-relief NN
emerges VBZ
emeritus NN JJ
emigrate VB
emigrated VBD
eminent JJ
emitted VBN
emote VB
emoted VBD
emotional JJ
empathize VB
emphasis NN
emphasize VB VBP
emphasized VBD VBN
emphasizes VBZ
emphaticize VB
employ VB VBP
employed VBN
employee-benefit JJ NN
employee-health NN
employees NNS VBZ
employerpaid JJ
employs VBZ
empower VBP
empowered VBN
empowers VBZ
emptied VBN
empty JJ VB VBP
emulate VB
emulated VBN
en IN FW
enable VB VBP
enabled VBD VBN
enables VBZ
enact VB
enacted VBN VBD
encapsulate VB
enchanting JJ
enclosed VBN
encompass VB
encompassed VBD
encompasses VBZ
encounter VB NN
encountered VBD VBN
encounters VBZ NNS
encourage VB VBP
encouraged VBN VBD JJ
encourages VBZ
encouraging VBG JJ
encrusted VBN
encumbered VBN
end NN VB VBP JJ
end-tailed VBN
end-zone NN
endanger VB
endangered VBN JJ
endangered-species NNS
endearing JJ
endeavor NN VB
ended VBD VBN
ending VBG NN
endorse VB VBP
endorsed VBD VBN
endorses VBZ
endow VB
endowed VBN VBD
endrocrine JJ
ends VBZ NNS
endure VB VBP
endured VBD VBN
enduring VBG JJ
energized VBN
energy-cogeneration NN
energy-industry NN
energy-services JJ NNS
enforce VB VBP
enforced VBN
enforces VBZ
engage VB VBP
engaged VBN VBD JJ
engages VBZ
engaging VBG JJ
engineer NN VB
engineered VBN JJ
engineering NN VBG
engraved VBN
engulfed VBN VBD
enhance VB
enhanced VBN JJ VBD
enhances VBZ
enjoin VB
enjoined VBN VBD
enjoy VB VBP
enjoyed VBN VBD
enjoys VBZ
enlarge VB
enlarged JJ VBN
enlighten VB
enlightened JJ VBN
enlightening VBG JJ
enlist VB
enlisted VBD
ennumerated VBD
enough RB JJ NN
enraged VBD JJ
enrich VBP
enroll VB VBP
enrolled VBD VBN
enroute RB
ensconced VBN
ensemble NN
ensnarled VBN
ensue VB
ensued VBD
ensure VB VBP
ensures VBZ
entail VB
entailed VBN
entails VBZ
entangled JJ VBN
enter VB VBP
entered VBD VBN
enterprising JJ
enters VBZ
entertain VB
entertained VBN VBD
entertaining JJ VBG
entice VB VBP
enticed VBD
entire JJ NN
entitle VB VBP
entitled VBN VBD
entitles VBZ
entombed VBN
entranced VBN
entree FW
entrench VB
entrenched VBN JJ
entrepreneurial JJ
entrust VBP VB
entrusted VBN
entwined VBN
environmental JJ
envisaged VBD VBN
envision VBP VB
envisioned VBN
envisions VBZ
envy NN VBP
envy-quotient NN
epic NN
epidemic NN
epitomize VBP
equal JJ VB VBP
equal-opportunity NN
equaled VBD VBN
equals VBZ
equate VB
equated VBN
equates VBZ
equip VB
equipped VBN JJ VBD
equips VBZ
equity-purchase JJ NN
equivalent NN JJ
er UH
eradicate VB
erase VB
erased VBN VBD
erases VBZ
erect VB
erected VBD VBN
erembal NNP
erm UH
erode VB VBP
eroded VBN VBD
erodes VBZ
err VBP VB
errata NNS
erred VBN VBD
errs VBZ
ersatz JJ
erudite JJ
erupt VB
erupted VBD VBN
erupts VBZ
escalate VB
escalated VBN VBD
escape VB NN
escaped VBD VBN
eschewed VBN
escorts VBZ
escrowed VBN
espouse VBP
esprit FW
essential JJ
establish VB
established VBN VBD JJ
establishes VBZ
establshed VBN
estimate NN VBP VB
estimated VBN VBD JJ
estimates NNS VBZ
estimating VBG NN
estranged VBN
estrogen-replacement NN
et CC FW NNP
etc FW NN
etc. FW NN
eternal JJ
ethos NN
eucalyptus NN
evacuate VB
evacuated VBN
evade VB
evaded VBN
evades VBZ
evaluate VB VBP
evaluated VBN VBD
evaluates VBZ
evangelist-industrialist NN
evaporate VB
evaporated VBD VBN
even RB JJ VB RB|JJ
evened VBN
evening NN
evens VBZ
eventual JJ
ever RB
everlasting JJ
every DT
everyday JJ
everything NN
everywhere RB
evidenced VBN
evident JJ
evil JJ NN
evil-doers NNS
evinced VBN VBD
evoke VBP
evokes VBZ
evolve VB
evolved VBD VBN
ex FW JJ
ex-Attorney NNP
ex-Marine NN
ex-President NNP JJ
ex-accountant NN
ex-dividend JJ NN
ex-employees NNS
ex-employer NN
ex-hurler NN
ex-member NN
ex-player NN
ex-president NN
ex-wife NN
exacerbate VB
exacerbated VBN VBD
exacerbates VBZ
exact JJ
exaggerate VB
exaggerated JJ VBN
examine VB VBP
examined VBD VBN
examines VBZ
excavated VBN
exceed VB VBP
exceeded VBD VBN
exceeds VBZ
excel VBP VB
excellent JJ
except IN VB
exceptional JJ
excess JJ NN
exchange NN VB VBP
exchange-rate NN JJ
exchanged VBD VBN
excise NN VB JJ
excised VBD VBN
excite VB
excited VBN JJ
exciting JJ
exclaims VBZ
exclude VB VBP
excluded VBN VBD
excludes VBZ
excorciate VB
excoriated VBN
excretory JJ
excursus NN
excuse NN VB
excused VBN
execute VB VBP
executed VBN VBD JJ
executes VBZ
executive NN JJ
executive-office NN
exemplified VBN
exemplifies VBZ
exempt JJ VB
exempted VBN
exercise NN VB VBP
exercised VBN VBD
exercises VBZ NNS
exert VB
exerted VBN
exhaled VBD
exhaust NN VBP VB
exhausted VBN VBD
exhausting JJ VBG
exhibit NN VB
exhibited VBN
exhibits VBZ NNS
exhilarating JJ
exhort VB
exiled VBD VBN
exist VB VBP
existed VBD VBN
existent JJ
existing VBG JJ
exists VBZ
exit NN VB
exited VBD
exits NNS VBZ
exodus NN
exonerated VBD VBN
exorbitant JJ
exorcise VB
expand VB VBP
expanded VBN VBD JJ
expands VBZ
expect VBP VB IN
expectant JJ
expected VBN VBD JJ VB
expects VBZ
expedite VB
expedited VBN JJ
expel VB
expelled VBN VBD
expended VBN
expenditures NNS VBZ
expense-account NN
expensive JJ RB
experience NN VB VBP
experienced VBN JJ VBD
experiences NNS VBZ
experimental JJ
experimented VBN VBD
expert NN JJ
expire VB VBP
expired VBD VBN JJ
expires VBZ
explain VB VBP
explained VBD VBN
explains VBZ
explanatory JJ
expletive NN
explicit JJ
explode VB
exploded VBD VBN
explodes VBZ
exploit VB VBP
exploited VBN
exploits NNS VBZ
exploratory JJ
explore VB VBP
explores VBZ
export NN VB JJ VBP
exported VBN VBD
exports NNS VBZ
expose VB VBP
exposed VBN VBD JJ
exposing VBG JJ
express VB VBP JJ
expressed VBD VBN
expresses VBZ
expunge VB
expunged VBN
exquisite JJ
extend VB VBP
extended VBN VBD JJ
extends VBZ
external JJ
extinct JJ
extinguish VB
extort VB
extorted VBD
extra JJ
extract VB NN
extracted VBN VBD
extracurricular JJ
extradited VBN
extramarital JJ
extramural JJ
extrapolated VBN
extraterrestrial JJ
extravagant JJ
extreme JJ NN
extricate VB
exude VBP
exuded VBD
eye-blink NN
eyed VBD
eyewitness NN
f SYM LS
f.o.b JJ
fable NN
fabric NN
fabricate VB
fabricated VBN
face NN VB VBP JJ
face-to-face JJ RB
faced VBN VBD
faces VBZ NNS
facial JJ
facilitate VB VBP
facsimile JJ NN
fact-finder NN
facto FW JJ
factor NN VB
factoring NN VBG
factors NNS VBZ
factory-jobs NNS
factory-modernization NN
factual JJ
fade VB
faded VBN VBD
fading VBG NN JJ
fail VB VBP
failed VBD VBN JJ
fails VBZ
faint JJ VB
faintest JJS
fainting NN VBG
fair JJ NN
fairer JJR
fairness NN
faithful NN JJ
fake JJ NN
faked VBD VBN
fall NN VB VBP
fallback NN JJ
fallen VBN JJ
falling VBG NN
fallow JJ
falls VBZ NNS
false JJ
falseness NN
falsified VBN
falsify VB
falter VBP
faltered VBD VBN
falters VBZ
famed JJ VBN
familiar JJ
familiarize VB
family NN
family-planning JJ NN
fan NN VB
fancier JJR
fancies VBZ
fanciest JJS
fancy JJ NN
fanned VBD
fans NNS VBZ
fantasize VBP VB
far RB JJ IN
far-left JJ NN
faraway JJ
fare NN VBP VB
fared VBD VBN
fares NNS VBZ
farm NN VB
farm-product NN
farming NN VBG
farms NNS VBZ
farther RBR RB
farthest JJS
fascinated VBN
fascinating JJ
fascist JJ
fashion NN VB
fashionable JJ NN
fashioned VBN
fast RB JJ
fast-food NN JJ
fastened VBN
faster RBR JJR
faster-growing JJR
fastest JJS
fastest-growing JJ JJS
fat JJ NN
fatal JJ
father-in-law NN
fatten VBP
fattened VBN VBD
fattening NN
fatter JJR
fault NN VBP
faulted VBN
faulty JJ
fauna NNS
faux JJ
favor NN VBP VB
favored VBN VBD JJ
favorite JJ NN
favors VBZ NNS
faxed VBD
fear NN VBP VB
feared VBD VBN JJ
fears NNS VBZ
fearsome JJ
feasted VBN
feature NN VB VBP
featured VBN VBD JJ
features NNS VBZ
fecal JJ
fed VBN NN VBD JJ
federal JJ
fee-forfeiture NN
feed NN VB VBP
feeding NN VBG
feeds VBZ
feel VBP VB NN
feeling NN VBG
feels VBZ
feet NNS
feisty JJ
feline JJ
fell VBD JJ NN VBN
felled VBN
fellow NN JJ
felt VBD VBN
female JJ NN
feminine JJ
feminist JJ NN
fencing NN
fend VB
fended VBD
ferret VB
ferris JJ
ferry NN VB
fertile JJ
fertilized VBN
fervent JJ
fervente NNP
fest JJS NN
fester VB
festooned VBN
fetal JJ
fetal-tissue JJ NN
fetch VB VBP
fetched VBD
fetches VBZ
fetus NN
feudal JJ
feuded VBD
feuding VBG NN
few JJ
fewer JJR RBR
fewest JJS
fickle JJ
fickleness NN
fictional JJ
ficus NN
fiddling NN
fide JJ
field NN VB
fielded VBD VBN
fielding NN VBG
fields NNS VBZ
fierce JJ
fifteenfold RB
fifth JJ RB NN
fifth-grade NN
fight NN VB VBP
fighter-bombers NNS
fighter-plane NN
fighting VBG NN
fights NNS VBZ
figure NN VB VBP
figured VBD VBN
figures NNS VBZ
filched VBN
file VB NN VBP
filed VBN VBD
files NNS VBZ
filial JJ
filigree JJ
filing NN VBG
fill VB VBP NN
filled VBN VBD
filling VBG NN
fills VBZ
filly NN
film-maker NN
film-makers NNS
film-processing NN
filmed VBN VBD
filtered VBN
filters NNS VBZ
finagled VBN
finagling NN
final JJ
finalized VBN VBD
finance NN VB
financed VBN VBD
finances NNS VBZ
financial JJ
financial-aid NN
financial-crimes NNS
financial-market NN
financial-services NNS JJ
financing NN VBG
finanicial JJ
find VB VBP
finding VBG NN
finds VBZ NNS
fine NN JJ VB RB
fine-arts NNS
fine-tuning NN VB
fined VBN VBD
finessed VBN
finest JJS
finger NN VB
finger-pointing NN JJ
fingered VBN
fingering VBG NN
finish VB NN VBP
finished VBD VBN JJ VB
finishes NNS VBZ
finishing VBG JJ
finite JJ
fire NN VB
fired VBN VBD
firefighting NN
firemen NNS
fireproofing NN VBG
fires NNS VBZ
firing NN VBG
firm NN JJ VB
firmed VBD VBN
firmer JJR RBR
firmness NN
first JJ RB NN LS JJS
first-floor NN
first-grader NN
first-half JJ NN
first-person NN
first-quarter JJ NN
firsthand RB JJ
fiscal JJ NN IN
fiscal-year NN
fish NN RB
fishermen NNS
fishing NN VBG
fishing\/processing JJ
fist NN RB
fit VB NN JJ VBP VBN
fitness NN
fits VBZ NNS
fittest JJS
fitting JJ NN
five CD
five-and-dime NN
fivefold JJ RB
fiveyear JJ
fix VB NN
fixed VBN JJ VBD
fixed-income JJ NN
fixedrate JJ
fizzes VBZ
fizzled VBD VBN
flabbergasted VBN
flabbiness NN
flag-burner NN
flag-burning NN
flagging JJ
flagrant JJ
flagrante FW
flagship NN JJ
flaky JJ
flamboyant JJ
flamed VBD
flare VBP
flared VBN
flash VBP NN VB
flashed VBD VBN
flashes NNS VBZ
flashier JJR
flashy JJ
flat JJ RB NN
flat-footed RB
flatness NN
flatten VB
flattened VBN VBD
flattering JJ
flatulent JJ
flaunt VB
flaunts VBZ
flawed VBN JJ
flay VB
fled VBD VBN
fledgling NN JJ
flee VB
fleeced VBN
fleet NN JJ
fleeting JJ
fleets NNS VBZ
flew VBD
flex JJ
flickered VBD
flied VBD
flies VBZ NNS
flight-attendants NNS
flight-to-quality NN
flightiness NN
flim-flam NN
flim-flammery NN
flimsy JJ
flinch VB
fling NN
flip JJ VB
flip-flop NN JJ
flippant JJ
flipped VBD
flips VBZ
flirted VBN VBD
float VB VBP NN
floated VBD VBN
floating VBG JJ
floating-point JJ NN
floating-rate JJ NN
floats VBZ
flocked VBD VBN
flog VB
flood NN VB
flooded VBN VBD
flooding NN VBG
flooring NN
flopped VBD VBN
floppy JJ
floppy-disk NN
flora NNS
floral JJ
flounder VB
floundered VBN
flourish VB
flourished VBN VBD
flourishing JJ VBG
flow NN VB VBP
flowed VBD
flowing VBG JJ
flown VBN
flows NNS VBZ
fluctuate VBP VB
fluctuated VBN VBD
fluctuates VBZ
fluent JJ
fluffy JJ
fluid JJ NN
flunk VBP
flush JJ VBP VB
fluting NN
fly VB VBP NN
fly-fishing NN
focal JJ
focus VB NN VBP
focused VBN VBD JJ
focuses VBZ
fog VB NN
foggy JJ
foil NN VB
foiled JJ VBD VBN
fold VB VBP
folded VBD VBN
folding VBG JJ NN
folkish JJ
folksy JJ
follow VB VBP
followed VBN VBD JJ
following VBG JJ NN
follows VBZ
folly NN
fond JJ
fondest JJS
fondness NN
food-fish NNS
food-industry NN
food-processing NN JJ
food-production NN
food-service NN JJ
food-services NNS
fool NN VB
fooled VBN
foolhardy JJ
fooling NN VBG
foolish JJ
foot NN VBP VB
foot-dragging NN
footing NN VBG
footnoted VBN
for IN RP RB
forbade VBD
forbidden VBN
forbids VBZ
force NN VB VBP
forced VBN VBD JJ
forcefulness NN
forces NNS VBZ
forcing VBG JJ
forecast NN VBN VBD VBP VB
forecasting NN VBG
forecasts NNS VBZ
foreclosed VBN VBN|JJ JJ VBD
foregone JJ
foreign JJ
foreign-aid NN
foreign-car NN
foreign-currency NN JJ
foreign-debt NN JJ
foreign-exchange NN JJ
foreign-investor NN
foreign-ownership NN
foreign-policy NN
foremost RB JJ
foresaw VBD
foresee VBP VB
foreseen VBN
foresees VBZ
foreshadowed VBN
forest-product NN
forest-products NNS JJ
forever RB
forfeit VB
forge VB
forged VBN
forget VB VBP
forgets VBZ
forgive VB
forgiven VBN
forgiveness NN
forgiving VBG JJ
forgo VB
forgot VBN VBD
forgotten VBN JJ
fork VB
forked VBN VBD
forlorn JJ
form NN VB VBP
form-letter NN
forma FW
formal JJ
formalizes VBZ
formed VBN VBD JJ
former JJ NN
forms NNS VBZ
formulate VB
formulated VBN
formulates VBZ
forsaken VBN
forth RB
forthcoming JJ
forthright JJ
fortified VBN
fortunate JJ
forward RB JJ VB
forwarding NN
forwards RB
fossil JJ NN
foster JJ VB
fostered VBD VBN
fought VBD VBN
foul JJ
foul-up NN
fouled VBN
fouling NN
found VBD VBN
founded VBD VBN
foundered VBD
foundering VBG JJ
founding NN VBG JJ
four CD
four-bagger NN
four-fold RB
four-for-one RB
four-square NN
four-to-one RB
four-wheel-drive NN
fourteen CD
fourth JJ RB
fourth-quarter JJ NN
foward JJ
fracas NN
fractional JJ
fractured JJ VBD VBN
fragile JJ
fragmented JJ VBN
fragments NNS VBZ
frail JJ
frame NN VB
framed VBN
framing VBG NN
franchise NN VB
franchised VBN JJ
franchises NNS VBZ
frank JJ
franking NN
fraudulent JJ
fraught JJ
fray NN VB
frayed VBN
freaked VBN
free JJ VB RB JJ|RB VBP
free-enterprise NN
free-fall JJ NN
free-floater NN
free-for-all NN
free-market JJ NN
free-speech NN
freed VBN VBD
freeing VBG NN
freemarket JJ
freer JJR
frees VBZ
freewheeling JJ
freeze NN VB
freezes VBZ NNS
freezing NN
freight NN VB
freight-transport JJ NN
french JJ
frequent JJ
frequents VBZ
fresh JJ
freshmen NNS
freshness NN
fret VBP NN VB
frets VBZ
fretted VBD
fried JJ VBN
friendlier JJR
friendliness NN
friendly JJ
frighten VB
frightened JJ VBN VBD
frightening JJ
frittered VBN
fro RB
frogmen NNS
frolic VB
frolicked VBN
from IN
front NN JJ RB
front-desk NN
front-page JJ NN
front-runner NN
front-seat NN
frontal JJ
frosty JJ
froth NN VB
frothy JJ
froze VBD
frozen VBN JJ
frugal JJ
frumpy JJ
frustrate VB
frustrated VBN JJ VBD
frustrating JJ VBG
fudge VB VBP
fudging NN
fuel NN VB
fuel-economy NN
fuel-services NNS
fuel-storage NN
fueled VBN VBD
fueling VBG NN
fulfill VB VBP
fulfilled VBN VBD
fulfills VBZ
full JJ RB
full-time JJ RB
fuller JJR
fullest JJS
fullscale JJ
fumes NNS VBZ
fumpered VBD
function NN VBP VB
functional JJ
functioned VBD
functioning VBG NN
fund NN VB VBP
fund-raiser NN
fund-raisers NNS
fund-raising JJ NN
fundamantal JJ
fundamental JJ
fundamentalist JJ
funded VBN JJ VBD
funding NN VBG
fundraising VBG NN
funds NNS VBZ
funeral JJ NN
fungi NNS
fungus NN
funky JJ
funnel VB
funneled VBN VBD
funny JJ
furloughed VBN
furnish VB
furnished VBN JJ
furrows VBZ
further JJ RBR RB JJR VB
furthermore RB
furthers VBZ
fusing NN
fusses VBZ
futile JJ
future JJ NN
futures-exchange NN
fuzzier JJR
fuzzy JJ
g SYM
gagged VBN
gain NN VB VBP
gained VBD VBN VB
gains NNS VBZ
gall-bladder NN
gallant JJ
galling JJ
galvanize VB
galvanized JJ VBD
gamble NN VB
gambling NN VBG
game-show NN
gaming NN
gaped VBN
gaping JJ
garbage-incinerator NN
garden NN VB
garden-shrub NN
garden-variety NN
gardening NN VBG
gargantuan JJ
garner VB VBP
garnered VBD VBN
gas NN
gas-gathering JJ VBG
gas-producing NN
gas-tax NN
gasp VB
gasped VBD
gather VB VBP
gathered VBD VBN
gathering NN VBG
gathers VBZ
gauge VB NN
gauges VBZ
gave VBD
gawky JJ
gay JJ
gaze VBP
gear NN VBP VB
geared VBN
gears VBZ
gemsbok NNS
gender NN VB
gene-splicing NN
general JJ NN
general-director NN
general-election JJ NN
general-insurance NN
general-practitioner NN
generalize VB
generalpurpose JJ
generate VB VBP
generated VBN VBD
generates VBZ
generating NN VBG
generic-drug NN JJ
genesis NN
genial JJ
genital JJ
genius NN
genteel JJ
gentile JJ
gentle JJ
gentlemen NNS
gentleness NN
gentler JJR
genuine JJ
gerrymandering NN
gestational JJ
gestured VBD
get VB VBP
get-together NN
get-togethers NNS
gets VBZ
ghastly JJ
ghost-busting NN
ghostbusting NN
ghostly JJ
giant NN JJ
giddy JJ
gift-giving NN
gilding NN
gilt JJ NN NN|JJ
girded VBD
give VB VBP
giveaway NN JJ
given VBN JJ
gives VBZ
giveth VBZ
giving VBG NN
glacial JJ
glad JJ
glamorize VB
glamorized VBN
glanced VBD
glares VBZ
glaring JJ
glasnost FW NN
glass NN
glass-making NN JJ
glaze VBP VB
glean VB
gleaned VBN
glib JJ
glide VB
glitterati NNS
glitzy JJ NN
gloat VB
gloated VBD
gloats VBZ
global JJ
global-news NN
gloomier JJR RBR
gloomy JJ
gloss VBP VB
glossy JJ
glowed VBD
glowing JJ VBG
glued VBN
glum JJ
glut NN VB
glutted JJ VBN
gnaw VB
gnawing NN
go VB VBP NN
go-ahead NN
go-around NN
gobbled VBN
goddess NN
goes VBZ
going VBG JJ NN
goings-on NNS
gold NN JJ
gold-leaf JJ NN
gold-mining NN JJ
goldbanded VBN
golden JJ
golfing NN
gon VBG VB
gone VBN VBN|JJ
good JJ NN RB
good-faith NN
good-will NN JJ
goodbye UH
goodness NN
goosey JJ
gore VB
gored VBN
gossipy JJ
got VBD VBN VBP VB
gotten VBN
gouging NN
gouty JJ
govern VB VBP
governed VBN VBD
governing VBG NN
government-bond NN
government-business NN
government-relations NNS
government-securities NNS
government-set VBN
governmental JJ
governmental-affairs JJ NNS
governmentset VBN
governor-elect NN
grab VB NN VBP
grabbed VBD VBN
grace NN VB
gradual JJ
graduate NN JJ
graduate-student NN
graduated VBD VBN
graduates NNS VBZ
grafted VBN
grammar-school NN
grand JJ
grand-jury JJ NN
grand-prize NN
grandchildren NNS
grander JJR
grandiose JJ
grandmotherly JJ
grant VB NN VBP
granted VBN VBD JJ
grants NNS VBZ
granular JJ
grapple VB
grappled VBD
grapples VBZ
grasp VB NN VBP
grass NN
grassy JJ
grave JJ NN
gravest JJS
gravitational JJ
gray JJ
gray-flannel NN
graying VBG NN
graze VBP
grazed VBD
grazing NN
great JJ RB
great-grandchildren NNS
great-grandfather NN
greater JJR
greater-fool JJR
greatest JJS
greatness NN
greed NN
greedier JJR
greedy JJ
green JJ NN
greener JJR
greening NN
greenish JJ
greet VB
greeted VBN VBD
greeting VBG NN
greets VBZ
grew VBD VBN
gridlocked JJ VBN
grill VBP
grim JJ
grimace VB
grimaced VBD
grimmest JJS
grimness NN
grind VB
grinds VBZ
gripes NNS VBZ
gripped VBD
gripping JJ VBG
grisly JJ
gritty JJ
groans VBZ
groped VBD
gross JJ
grotesque JJ
ground NN VB VBN VBD JJ
ground-cargo NN
ground-handling NNS NN
grounded VBN
grounding VBG NN
groundup JJ
group NN VB
grouped VBN
groused VBD
grouses VBZ
grovels VBZ
grow VB VBP
growing VBG NN JJ
growls VBZ
grown VBN JJ
grows VBZ
growth NN VB JJ
growth-stock JJ NN
grudging JJ
grueling JJ VBG
gruesome JJ
gruff JJ
grumble VBP
grumbled VBD
guarantee NN VB VBP
guaranteed VBN JJ VBD
guaranteeing VBG NN
guarantees NNS VBZ
guard NN VB VBP
guarded VBN JJ VBD
guards NNS VBZ
gubernatorial JJ
guess VBP VB NN
guessed VBD
guest NN JJ
guide NN VB
guided VBN VBD
guided-missile NN JJ
guiding VBG JJ
guilty JJ RB
gun-running NN JJ
gungho JJ
gunmen NNS
gunned VBN
gurus NNS
gush VBP
gushes VBZ
gut NN VB
gutsy JJ
guzzle VB
gyrate VB
gyrated VBD
hack VB
had VBD VBN
haggle VB
hailed VBD VBN
hails VBZ
hairy JJ
half NN PDT DT JJ RB
half-an-hour NN
half-block NN
half-brother NN
half-century NN
half-dozen NN JJ
half-hour NN JJ
half-interest NN
half-life NN
half-measure NN
half-share NN
half-states NNS
half-time NN
half-year NN
halfway RB
halogenated VBD
halt NN VB VBP
halted VBN VBD NN
halting VBG JJ
halts NNS VBZ
halve VB
halved VBN JJ VBD
halves VBZ NNS
hammer VB NN
hammered VBN
hammering VBG NN
hamper VB
hampered VBN VBD
hampers VBZ
hamstring VB
hamstrung VBP JJ VBN
hand NN VB RB
hand-carried VBN
hand-lotion NN
hand-wringing NN
handcuffed VBN
handed VBN VBD
handful NN
handheld JJ
handicap NN VB
handicapped NNS JJ VBN
handle VB VBP
handled VBN VBD
handles VBZ
handling VBG NN
handmade JJ
handpicked VBN
hands NNS VBZ
handsome JJ
handwriting NN
handwritten JJ
handy JJ
hang VB VBP
hanged VBN
hanging VBG NN
hangs VBZ
haole FW
haphazard JJ
happen VB VBP
happened VBD VBN
happening VBG NN
happens VBZ
happier JJR
happiness NN
happy JJ
harangues NNS VBZ
harass VB
harassed VBD
harbor NN VBP
harbors NNS VBZ
hard JJ RB
hard-charging JJ NN
hard-currency NN JJ
hard-disk NN JJ
hard-liner NN
hardbound JJ
hardened VBN JJ
harder JJR RBR RB
hardest JJS RBS
hardware-maintenance NN
hardworking JJ
hardy JJ
harm NN VB VBP
harmed VBN VBD
harms VBZ NNS
harness NN
harp VB
harped VBD
harried VBN
harrowing JJ
harsh JJ
harsher JJR
harshest JJS
harshness NN
harvest NN VBP
harvested VBN
harvesting NN
has VBZ VBP VBN
hasten VB
hastened VBN
hasty JJ
hatch VB
hatched VBN
hate VBP VB NN
hated VBN
hates VBZ
hatred NN
haughty JJ
haul NN VB
hauled VBD
haunt VB VBP
haunted VBN JJ
haunting VBG NN
haunts NNS VBZ
have VBP VB VBD JJ VBN
hawk NN VBP
hawkish JJ
hazardous-waste NN JJ
hazardous-waste-site NN
he PRP
head NN VB VBP JJ
head-hunting NN
head-to-head RB
headcount-control NN
headed VBN VBD
headlined VBN VBD
headlong RB
headquarter JJ
headquarters NN NNS
heads VBZ NNS
heady JJ
heal VB
healed VBN
healing NN VBG
health-care NN JJ
health-care-product NN
health-coverage NN
health-food NN
health-maintenance NN
health-products NNS
healthier JJR RBR
healthiest JJS
healthy JJ
heaped VBD VBN
hear VB VBP
heard VBN VBD
hearing NN VBG
hears VBZ
heart NN RB
heartened VBN
heartfelt JJ
heartstopping JJ
hearty JJ
heat NN VB
heat-treatment NN
heated JJ VBN
heathen JJ
heating NN VBG
heats VBZ
heaved VBN VBD
heaves VBD
heavier JJR RBR
heaviest JJS
heavy JJ NN
heavy-construction NN
heavy-crude NN
heavy-handedness NN
heavy-industry NN
heavy-truck NN
heavy-water NN
heavyweight JJ
heck NN UH
heckled VBN
hedge VB NN JJ VBP
hedging VBG NN VBG|JJ
heebie-jeebies NNS
heed VB NN
heeded VBD VBN
heftier JJR
hefty JJ
heighten VB
heightened VBN JJ VBD
held VBN VBD JJ
hell NN UH
hell-kitten NN
hello UH
help VB NN VBP
helped VBD VBN VBP
helps VBZ
hemorrhaged VBN
hemorrhaging VBG NN JJ
hence RB
hepatitis NN NNP
her PRP$ PRP
herald VB VBP
heralded VBN
herbal JJ
herding VBG NN
here RB
hereabouts RB
hereafter RB
heretofore RB
herniated VBN
herring NN
hers PRP
herself PRP
hesitant JJ
hesitate VB VBP
hewed VBD
hewn VBN
hews VBZ
hey UH
hiatus NN
hid VBD
hidden VBN JJ
hide VB
hidebound JJ
hiding VBG NN
high JJ NN RB
high-definition JJ NN
high-fidelity NN
high-growth NN
high-mindedness NN
high-net NN
high-performance JJ NN
high-purity NN
high-quality JJ NN
high-rises NNS
high-risk JJ CD
high-school NN JJ
high-society NN
high-tech JJ NN
high-technology NN JJ
high-visibility JJ NN
high-yield JJ NN
higher JJR RBR
higher-cost JJ JJR
higher-fat JJR
higher-profit JJR
higher-quality NN
highest JJS RB RBS
highest-priced JJS
highest-quality JJ JJS NN
highlight VB NN
highlighted VBN VBD
highlights VBZ NNS
hiked VBN
hiking NN
hilly JJ
him PRP
himself PRP
hinder VB
hindered VBD VBN
hinders VBZ
hinge VB
hint NN VB VBP
hinted VBD VBN
hints NNS VBZ
hire VB VBP NN
hired VBN VBD
hires VBZ NNS
hiring VBG NN
his PRP$ PRP
hissed VBD
historical-claims NNS
historicized VBN
hit VBD VBN NN VB VBP
hitched VBN
hither RB
hits NNS VBZ
hoard NN VBP
hoarding NN VBG
hobbled VBN
hobbles VBZ
hoc FW
hog NN NNS
hoisted VBN
hoisting NN
hold VB VBP NN VB|NN
holding VBG NN
holds VBZ
hole NN VBP
holed VBN
holiest JJS
holler VB
hollow JJ
holy JJ
home NN RB
home-building JJ NN
home-computer NN
home-delivery NN
home-equity JJ NN
home-improvement NN
home-ownership NN
home-run NN JJ
home-sharing NN
home-shopping NN
homecoming NN
homeless JJ NN
homelessness NN
homer NN VB
homered VBD
homologous RB
homosexual JJ NN
hone VB
honed VBN JJ
honest JJ
honor VB NN VBP
honored VBN
hoodwinked VBN
hook NN VB
hook-up NN
hooked JJ VBN VBD
hooks VBZ
hope VBP NN VB
hoped VBN VBD
hopeful JJ NN
hopes VBZ NNS
hops VBZ
hopscotched VBD
horrifying JJ
horse-breeding NN
horticultural JJ
horticultural-products NNS
hoses VBZ NNS
hospitalized VBN
host NN VB
hosted VBD
hostile JJ NN
hosts NNS VBZ
hot JJ
hot-cereals NNS
hot-line NN
hotel-casino NN
hotel-casinos NNS
hotel-restaurant NN
hottest JJS
hounded VBD
hourlong JJ
hourly JJ
house NN VB VBP
housecleaning NN
housed VBN
househld JJ
household NN JJ
housekeeping NN
houses NNS VBZ
housing NN
housing-construction NN
housing-discrimination NN
housing-loan NN
hovered VBD VBN
how WRB
howdy UH
however RB WRB
huddled VBD
huge JJ
hugged VBD
hugging VBG NN
hum VB NN
human JJ NN
human-resources NNS
human-rights JJ NNS NN
humaneness NN
humanist JJ
humanitarian JJ
humbled VBN
humid JJ
humiliating JJ
hunched VBN
hundred CD
hundredth JJ
hung VBD VBN JJ
hungry JJ
hunker VB
hunt NN VB VBP
hunted VBN
hunter-gatherers NNS
hunting NN VBG
hunts VBZ
hurl VBP
hurled VBN
hurried JJ VBN
hurries VBZ
hurry NN VB
hurt VBN VB VBD VBP NN JJ
hurts VBZ
hush JJ
husky JJ
hustings NN
hustles VBZ
hybrid JJ NN
hyped VBD NN
hyper JJ
hyper-trader NN
hyperventilating NN
hyping NN VBG
hypnotized VBN
hypothesized VBN
i PRP NNP NNS FW
i.e. FW
i860 NN
ice-baggers NNS
ice-core NN
iced-tea NN
ideal JJ NN
identified VBN VBD
identifies VBZ
identify VB VBP
identity-management NN
idle JJ VB
idled VBN VBD
idling VBG NN
if IN JJ
iffy JJ
ignite VB
ignited VBN VBD
ignoramus NN
ignore VB VBP
ignored VBN VBD
ignores VBZ
ill JJ RB
illegal JJ
illegitimate JJ
illicit JJ
illiquid JJ
illiterate JJ
illness NN
illogic NN
illuminate VB
illuminates VBZ
illuminating JJ
illustrate VBP VB
illustrated VBN VBD
illustrates VBZ
image-making NN
imagine VB VBP
imagined VBD VBN
imagines VBZ
imaging NN
imitate VBP
imitated VBN
immediate JJ
immense JJ NN
immersed VBN
immigrant JJ
immigrated VBD
imminent JJ
immodest JJ
immoral JJ
immune JJ
immune-system NN
impact NN VB
impacted VBN
impair VB
impaired VBN JJ
impart VB
impartial JJ
impassiveness NN
impatient JJ NN
impeached VBN
impede VB
impeded VBN
impedes VBZ
impelled VBN
impending JJ VBG
imperative JJ NN
imperfect JJ
imperial JJ
imperiled VBN
impetus NN
implant VB
implanted VBN VBD
implement VB
implemented VBN VBD
implements VBZ
implicate VB
implicated VBN
implicit JJ
implied VBN VBD JJ
implies VBZ
implores VBZ
imply VBP VB
imponderable NN
import NN VB VBP
important JJ
imported VBN VBD JJ VBN|JJ
imports NNS VBZ
impose VB
imposed VBN VBD
imposes VBZ
imposing VBG JJ
impound VB
impounded VBN
impoverished VBN JJ
impress VB
impressed VBN JJ VBD
impresses VBZ
impressionist NN JJ
imprison VB
imprisoned VBN
impromptu JJ
improper JJ
improve VB VBP
improved VBN JJ VBD
improves VBZ
improving VBG NN
improvisational JJ
improvisatory JJ
improvised VBD
impudent JJ
impugn VB
in IN RP RB FW NN RBR
in-and-outer NN
in-crowd NN
in-house JJ NN RB
in-law NN
inaccurate JJ
inadequate JJ
inadvertent JJ
inappropriate JJ
inasmuch RB
inaugural JJ
inaugurated VBN
inbound JJ
incarcerate VB
incensed JJ VBN
incentive NN JJ
incentive-bonus NN
inch NN VB
inched VBD VBN
incidental JJ
inclined VBN JJ
include VBP VB
included VBD VBN JJ
includes VBZ
including VBG IN JJ
incoherent JJ
income-tax NN JJ
incoming JJ
incompetent JJ
incomplete JJ
incomprehensible NN
inconsistent JJ
inconvenient JJ
incorporate VB
incorporated VBN JJ VBD
incorporates VBZ
incorrect JJ
increase NN VB VBP
increased VBN VBD JJ VB VBN|JJ
increases NNS VBZ
increasing VBG JJ
incremental JJ
incumbent JJ
incur VB VBP
incurred VBN VBD
indebtedness NN
indecent JJ
indecisiveness NN
indeed RB
indefinite JJ
indemnify VB
independant JJ
independent JJ NN
indeterminate JJ
index-arbitrage NN JJ
index-fund JJ NN
index-futures NNS
index-options NNS
index-trading NN
indexed VBN
indexing NN VBG
indicate VBP VB
indicated VBD VBN JJ
indicates VBZ
indict VB
indicted VBN VBD
indifferent JJ
indirect JJ
indirectness NN
individual JJ NN
individual-investor NN JJ
individual-retirement-account NN
indoctrinated VBN
indoor JJ
indoors RB
induce VB
induced VBN VBD
induces VBZ
indulge VB
indulges VBZ
industrial JJ
industrial-product NN
industrialize VB
industrialized VBN JJ
industrials NNS VBZ
industry-government JJ NN
industrywide JJ RB
ineffectiveness NN
ineffectual JJ
inefficient JJ
inept JJ
infant NN JJ
infant-mortality NN
infantile JJ
infected JJ VBN VBD
inferior JJ
inferred VBN
infertile JJ
infighting NN
infiltrate VB
infiltrated VBN
inflame VB
inflammatory JJ
inflate VB
inflated VBN JJ VBD
inflates VBZ
inflation-adjusted JJ CD
inflation-fighting NN JJ
inflation-growth NN
inflict VB
inflicted VBN VBD
influence NN VB VBP
influence-peddling NN
influenced VBN VBD
influences VBZ NNS
influential JJ
inform VB
informal JJ
information-display NN
information-processing NN
information-services NNS
information-systems NNS
informational JJ
informed VBN VBD JJ
informs VBZ
infrastructural JJ
infrequent JJ
infringe VB
infringed VBN VBD
infringes VBZ
infuriate VB
infuriated VBD
infuse VB
infused VBN
ingest VB
ingratiate VB
inhabit VBP
inhabited VBN
inhabits VBZ
inherent JJ
inherit VBP
inherited VBN VBD
inherits VBZ
inhibit VB VBP
inhibited VBD
inhuman JJ
inhumane JJ
initial JJ NN
initialed VBD
initiate VB NN VBP
initiated VBN VBD
initiative NN
initiatives NNS VBZ
inject VB
injected VBN VBD
injects VBZ
injure VB
injured VBN JJ VBD
inking NN
inkling NN
inland RB
innate JJ
inner JJ
inner-city JJ NN
inning NN
innings NN NNS
innocent JJ
innovate VB
innovated VBD
inordinate JJ
inquired VBD
insane JJ
insecure JJ
insert VB NN
inserted VBN VBD
inside IN RB JJ NN
inside-the-beltway NN
insider-trading NN JJ
insignificant JJ
insist VBP VB
insisted VBD VBN
insistent JJ
insists VBZ
insofar RB
insolvent JJ
inspect VB VBP
inspected VBN VBD
inspectors NNS VBZ
inspirational JJ
inspire VB VBP
inspired VBN VBD JJ
inspiring JJ
insta-book NN
install VB VBP
installed VBN VBD JJ
installment NN JJ
instant JJ NN
instead RB
instigated VBD
instill VB
institute NN VB
instituted VBN VBD
institutes NN
institutional JJ
instruct VB
instructed VBN VBD
instruction-set JJ NN
instructional JJ
instructs VBZ
instrumental JJ
insubstantial JJ
insufficient JJ
insulate VB VBP
insulated VBN
insult NN VB
insulting JJ VBG
insurance-claims NNS
insurance-company NN
insurance-industry NN
insurance-reform NN
insure VB VBP
insured VBN JJ NN VBD
insures VBZ
intact JJ
intangible JJ NN
integral JJ
integrate VB
integrated VBN JJ
integrated-steel NN
integrated-technologies NNS
intellectual JJ NN
intelligent JJ
intend VB VBP
intended VBN VBD JJ
intends VBZ
intense JJ
intensified VBN VBD JJ
intensify VB
intensifying VBG JJ
intent NN JJ
intentional JJ
interbank NN JJ RB
interceded VBD
intercepted VBN
intercollegiate JJ
interconnect VB
interconnected VBN
intercorporate JJ
interest NN VB
interest-rate NN JJ
interested JJ VBN
interesting JJ
interests NNS VBZ
interfere VB VBP
interfered VBD
interferes VBZ
intergenerational JJ
intergovernmental JJ
intergrated-steel NN
interim JJ NN
interior JJ NN
interior-furnishings NNS
interjects VBZ
interleukin-2 NN
interleukin-4 NN
intermarket JJ
intermediate JJ
intermittent JJ
intermixed VBD
internal JJ
internal-security NN
international JJ
international-money-markets NN
international-operations NNS
interpret VB VBP
interpreted VBN VBD
interprets VBZ
interprovincial JJ
interrogated VBN
interrupt VB
interrupted VBN JJ
interspersed VBN
intersperses VBZ
interstate JJ NN
intertwined VBN
intertwining VBG JJ
intervene VB
intervened VBD VBN
interview NN VB
interviewed VBN VBD
interwar JJ
intimate JJ VB
intimidate VB
intimidated VBN
intimidating VBG JJ
intitiative NN
into IN
intones VBZ
intracompany JJ
intraday NN JJ
intraocular JJ
intrastate JJ
intrauterine JJ
intricate JJ
intrigued VBN
intriguing JJ
introduce VB
introduced VBN VBD
introduces VBZ
introductory JJ
intrude VBP
inundated VBN
invade VB VBP
invaded VBD
invades VBZ
invalid JJ
invalidated VBD
invective NN
invent VB VBP
invented VBD VBN
inventiveness NN
inverse NN JJ
inverted JJ VBN
invest VB VBP
invested VBN VBD
investigate VB
investigated VBN VBD
investigates VBZ
investigational JJ
investigative-reporting NN
investing VBG NN VBG|NN JJ
investment NN JJ
investment-banking NN JJ
investment-house NN
investment-newsletter NN
investor-relations NNS JJ
invests VBZ
inveterate JJ
invite VB
invited VBN VBD
invites VBZ
invoicing NN
invoke VB
invoked VBD VBN
invokes VBZ
involve VB VBP
involved VBN VBD JJ VB
involves VBZ
inward RB
irk VB
irked VBN VBD
irks VBZ
irksome JJ
iron NN VB
ironclad JJ
irradiated JJ VBN
irrational JJ
irregular JJ
irrelevant JJ
irrespective RB
irreverent JJ
irritated JJ VBN
irritates VBZ
is VBZ NNS
islands NNS VBZ
isolate VB VBP
isolated VBN VBD JJ
isolates VBZ
issue NN VB VBP
issued VBN VBD JJ
issues NNS VBZ
isthmus NN
it PRP
itemize VB
itinerary NN
its PRP$
itself PRP
ivory NN JJ
jack NN VB
jacked VBN VBD
jailed VBN JJ VBD
jalapeno JJ
jam NN VB
jammed VBD VBN JJ
jamming NN
jarring JJ VBG
jawboning NN
jazzy JJ
jelled VBD
jeopardize VB
jeopardized VBN
jeopardizes VBZ
jerked VBN
jet NN VBP
jet-engine NN
jinxed VBN
jittery JJ
job-classification NN
job-training NN
joblessness NN
jockeying NN
jogging NN
jogs VBZ
join VB VBP
joined VBD VBN
joins VBZ
joint JJ NN
joint-implants NNS
joint-venture JJ NN
joke NN VB
joked VBD
jokes NNS VBZ
jolt NN VB
jolted VBD VBN
jonron FW
jostle VBP
jour FW
jovial JJ
jubilant JJ
judge NN VB VBP
judged VBN
judgmental JJ
judicial JJ
judicial-conduct NN
judiciary NN
juggle VB
juggling NN VBG
juicy JJ
jumbo JJ
jump NN VB VBP
jumped VBD VBN
jumpiness NN
jumps NNS VBZ
jumpy JJ
junior JJ NN
junk NN VB
junk-bond NN JJ NNS
junk-fund NN
junk-holders NNS
junk-mail NN JJ
junk-market NN
jurisdictional JJ
jury-rigged VBD
just RB JJ
justified VBN JJ
justifies VBZ
justify VB
juvenile JJ
juxtapose VBP
kanji FW
karaoke FW NN
kayoed VBN
keen JJ VB
keep VB VBP
keeps VBZ
kelly\/varnell NNP
kept VBD VBN
ketchup NN VB|IN
key JJ NN VB
keyed JJ VBN
kick VBP VB NN
kicked VBD VBN
kicks VBZ NNS
kidnap VB
kidnapped VBN VBD
kidnapping NN
kidney-stone NN
kill VB VBP NN
killed VBN VBD
killing VBG NN
kills VBZ
kind NN JJ RB
kinder JJR
kindled VBN
kindness NN
kinfolk NNS
king NN
kitschy JJ
kneaded VBN
knew VBD
knit VBN
knitted VBN
knock VB NN
knock-off NN
knocked VBD VBN
knocks VBZ
knotty JJ
know VB VBP
know-how NN
known VBN JJ
knows VBZ
kowtow VB
kronor NNS NN
l'Ouest NNP
l'oeil FW
la FW NNP DT
label NN VBP VB
labeled VBN VBD
labels NNS VBZ
labor-management JJ NN
labor-shortage NN
laced VBN
laches NN
lack NN VBP
lacked VBD VBN
lacking VBG JJ
lackluster JJ NN RB
lacks VBZ
laden JJ
lag NN VBP VB
laggard JJ NN
lagged VBN VBD
lagging VBG JJ NN
lags VBZ NNS
laid VBN VBD
laissez-faire FW
lambasted VBD
lambastes VBZ
lame JJ
lamented VBD
laments VBZ
laminated VBN
land NN VB
land-ownership NN
land-use NN
landed VBD VBN
landing NN VBG
landmark NN JJ
landscaping NN
languish VB
languished VBD VBN
languishes VBZ
lanzador FW
lap NN VBP
lapsed VBN JJ
lapses NNS VBZ
laptop NN JJ
large JJ RB
large-capitalization NN JJ
large-denomination NN
larger JJR
largess NN
largest JJS
largish JJ
laser-beam-printer NN
lash VBP VB
lashed VBD
last JJ VB RB NN VBP
lasted VBD VBN
lastest JJS
lasting JJ VBG
lasts VBZ
latch VBP
latched VBN
latches VBZ
late JJ RB
late-payment NN
later RB RBR JJ JJR
latest JJS JJ
latter JJ NN
lauded VBD VBN
laugh NN VB
laughed VBD VBN
laughing VBG JJ
laughs VBZ NNS
launch VB NN
launch-vehicle NN
launched VBN VBD
launches VBZ NNS
launching VBG NN
launder VB
laundered VBN VBD
laundering NN VBG
lavish JJ
lavished VBN
law-enforcement NN JJ
law-making NNS
lawmaking JJ NN
lawyering NN
lax JJ
laxative NN
lay VB VBD VBP
lays VBZ
lazy JJ
le DT FW
lead VB NN JJ VBP VBN
leading VBG JJ
leads VBZ NNS
leafy JJ
leaked VBN VBD
leaky JJ
lean JJ VB VBP
leaned VBD VBN
leaner JJR RBR
leans VBZ
leap NN VB VBP
leaped VBD VBN
leapfrog VB
leapt VBD
learn VB VBP
learned VBD VBN
learning VBG NN
learns VBZ
lease NN VB VBP
leased VBN VBD
leases NNS VBZ
leasing NN VBG VBG|NN
least JJS RBS
leave VB VBP NN
leaves VBZ NNS
leaving VBG NN
lecture NN VB VBP
lectured VBD
lectures VBZ
led VBN VBD
leery JJ
left VBD VBN JJ NN RB
leftist JJ
legal JJ
legal-services NNS
legislate VB
legislating NN
legitimate JJ
legitimize VB
legitimized VBN
leisurely JJ RB
lend VB VBP
lending NN VBG JJ
lends VBZ
lengthen VBP VB
lengthened VBN VBD
lengthens VBZ
lengthy JJ
lenient JJ
lens NN
lent VBD VBN
les FW
less JJR RBR CC JJS RBR|JJR RB
less-advanced JJ|JJR
less-ambitious JJR
less-developed JJ JJR
less-junky JJR
less-perfectly RBR
less-rigorous JJR
lessen VB
lesser JJR
lest IN
let VB VBD VBP VBN
lethal JJ
lets VBZ
level NN JJ VB VBP
leveled VBN VBD
leveling VBG NN
leverage NN VB
leveraged JJ VBN NN
leveraged-buy-out JJ NN
levied VBD
levy NN VB
lewdness NN
libeled VBN
liberal JJ NN
liberalize VB VBP
liberalized VBN VBD
liberated VBD JJ
liberating JJ
library NN
lice NNS
license NN VB VBP
licensed VBN VBD JJ
licenses NNS VBZ
licensing NN VBG
licentiousness NN
lie VB VBP NN
lied VBD
lies VBZ NNS
life-insurance NN JJ
life-style NN JJ
lifelong JJ
lifesize JJ
lift VB NN VBP
lift-ticket JJ NN
lifted VBN VBD
lifting NN VBG
lifts NNS VBZ
light JJ NN VB
light-crude NN
light-wave JJ NN
lighted VBN JJ
lighten VB
lightened VBD
lighter JJR
lightest JJS
lighting NN VBG
lightning NN
lightweight JJ
like IN VB VBP JJ
liked VBD VBN
likely JJ RB
likened VBD VBN
likeness NN
likes VBZ NNS NN
likewise RB
lilting JJ
lily NN
limit NN VB VBP
limited JJ VBN VBD
limited-partnership NN
limits NNS VBZ
limp JJ NN
limpid JJ
line NN VB VBP
line-up NN
linear JJ
lined VBN VBD
linger VB
lingers VBZ
lining NN VBG
link NN VB VBP
linked VBN VBD
links NNS VBZ NN
lion's-head NN
lip NN JJ
liquefied VBN
liquefies VBZ
liquefy VB VBP
liquid JJ NN
liquid-chromatography NN
liquid-nitrogen NN
liquidate VB
liquidated VBN VBD
liquidating VBG JJ NN
lire NNS NN
list NN VB VBP
listed VBN VBD JJ
listen VB VBP
listened VBD VBN
listening VBG NN
listens VBZ
listing NN VBG
lists NNS VBZ
lit VBD VBN
literal JJ
litle JJ
litmus NN
litter NN VBP
littered VBN
little JJ RB
live VB VBP JJ RB
live-hauled VBD
live-haulers NNS
lived VBD VBN
livelier JJR
liveliest JJS
lively JJ
lives NNS VBZ
livid JJ
living VBG NN JJ
load NN VB
loaded VBN VBD JJ
loading NN VBG
loan NN VB
loan-guarantee NN
loan-loss JJ NN
loan-management NN
loaned VBD VBN
loans NNS VBZ
loath JJ
loathed VBN VBD
loathes VBZ
loathsome JJ
lobbied VBD VBN
lobby NN VB
lobbying VBG NN
local JJ NN
localized JJ VBN
locate VB VBP
located VBN JJ
lock VB NN VBP JJ
locked VBN VBD JJ
locking-in NN
locks NNS VBZ
locomotive NN
lodge VB
lodged VBN VBD
lofty JJ
log VB NN VBP
log-rolled VBD
logged VBN VBD
logic NN
logistics-computer NN
logs NNS VBZ
loitering NN
lone JJ
lonely JJ
long JJ RB VBP
long-distance JJ NN
long-term JJ NN RB NNS
longer RBR RB JJR
longer-term JJ JJR
longest JJS
longing NN
longstanding JJ
longterm JJ
longtime JJ NN
look VB VBP NN
look-alike JJ NN
looked VBD VBN
lookee-loos NNS
looks VBZ NNS
loom VBP VB
looms VBZ NNS
loony JJ
loose JJ RB VB RB|RP
loosen VB
loosened VBN
loosening NN VBG
looser JJR
loot NN VB
looting NN VBG
lopped VBD
lorded VBD
lose VB VBP
loser NN JJ
loses VBZ NNS
losing VBG JJ NN
loss NN
lost VBD VBN JJ
lot NN RB
loud JJ RB
louder RBR JJR
loudest JJS
lousy JJ
loutish JJ
love NN VBP VB
loved VBD VBN
loveliest JJS
lovely JJ
loves VBZ
loving JJ
low JJ NN RB
low- JJ
low-altitude NN
low-caliber NN
low-cost JJ NN
low-density NN
low-end JJ NN
low-income JJ NN
low-lifes NNS
low-profitmargin NN
low-tax NN
lower JJR RBR VB VBP
lower-court NN
lower-emission NN
lower-quality JJR NN
lowered VBD VBN
lowers VBZ
lowest JJS
lowest-cost JJS
lowly JJ
loyal JJ
lubricant NN JJ
lubricating-oil NN
lucid JJ
lucked VBD
luckier JJR
lucky JJ
lugged VBD
lukewarm JJ
lulled VBN
lumber NN VBP
lumped VBN
lumpier JJR
lumps VBZ NNS
lunch NN VB
lung-cancer NN
lunged VBD
lurch VBP
lurched VBD
lure VB NN
lured VBN VBD
lures VBZ NNS
lush JJ
luxury NN JJ
luxury-car NN
luxury-suite NN
lyric NN
machikin FW
machining NN
macho JJ NN
mad JJ
made VBN VBD
madness NN
mafiosi NNS
magic JJ NN
magnetized VBN
magnificent JJ
magnified VBN VBD
magnify VB
maiden JJ NN
mail NN VB VBP
mail-order NN JJ
mail-room NN
mail-sorting VBG
mailed VBN VBD
mailing NN VBG
mailmen NNS
main JJ NN
mainframe NN JJ
mainland NN JJ
mainline NN JJ
mainstay NN JJ
mainstream NN JJ
maintain VB VBP
maintained VBN VBD
maintains VBZ
maitre NNP
major JJ NN
majoritarian JJ
majority NN JJ
make VB VBP NN
make-work NN
makes VBZ NNS
makeshift JJ
making VBG NN
male JJ NN JJ|NN
malignant JJ
maligned VBN
mammalian JJ
mammoth JJ
man NN VB UH
man-hours NN
manage VB VBP
managed VBN VBD JJ
management-by-objective NN
management-consultant NN
management-employee NN
management-pilot NN
management-research NN
management-union NN
managerial JJ
manages VBZ
managing VBG NN
mandate NN VB
mandated VBN VBD
mandates VBZ NNS
mandatory JJ
maneuver NN VB
maneuvered VBD VBN
maneuvering NN VBG
maneuvers NNS VBZ
manhandled VBN
manic-depressive NN
manifest JJ VBP
manipulate VB VBP
manipulated VBN
manipulates VBZ
manned VBD
manual JJ
manuevering NN VBG
manufacture VB NN VBP
manufactured VBN VBD JJ
manufactures VBZ
manufacturing NN VBG
manufacturing-cost NN
manufacturing-sector NN
many JJ DT RB PDT VB NNS
map NN VBP VB
mapped VBN
mapping NN VBG
maquiladoras FW
marble NN
marcato FW
march NN VB VBP
marched VBD VBN
mare-COOR NNP
margin NN JJ
margin-calls NNS
marginal JJ
marginalia NNS
margined VBN
marine JJ NN
marine-research NN
marine-transport NN
marital JJ
mark NN VB VBP
mark-up NN
marked VBD VBN JJ
market NN VB VBP
market-if-touched NN
market-maker NN
market-makers NNS
market-making NN JJ
market-revision NN
market-share JJ NN
market-system NN
marketed VBN VBD
marketing NN VBG JJ
marketing-communications NNS
marketmaking NN
markets NNS VBZ
marketwide JJ
markka FW NNS
marks NNS VBZ
marred VBN
married VBN JJ VBD
marry VB
mart NNP NN
martial JJ
marvel VB
marveled VBD
masculine JJ
masked VBN VBD
mass NN JJ RB
mass-media NNS
mass-merchandise NN
mass-murderer NN
mass-producing VBG
massage NN VB
masse FW NN
massed VBD
master NN VB
mastered VBN
masterminding NN
match VB NN VBP
matched VBN VBD
matches VBZ NNS
matching VBG JJ NN
matchmaking NN
mated VBN
material NN JJ
materialize VB VBP
materialized VBD VBN
materializes VBZ
mathematics NN NNS
mating NN VBG
matryoshka FW
matter NN VB VBP
matter-of-factly RB
mattered VBN
matters NNS VBZ
mature VBP VB JJ NNP
matured VBN
matures VBZ
maul VB
maximize VB
maximum NN JJ
may MD
maybe RB
mayoral JJ
me PRP FW
meager JJ
mealy JJ
mean VB VBP JJ NN
meandered VBD
meanders VBZ
meaner JJR
meanest JJS
meaning VBG NN
means VBZ NNS NN
meant VBN VBD
meantime NN RB
meanwhile RB NN
measure NN VB
measured VBN VBD JJ
measures NNS VBZ
measuring VBG NN
meatpacking NN
meddle VB
meddling VBG NN
media NNS NN
median JJ NN
mediate VB
medical-airlift NN
medical-care NN
medical-practice NN
medical-products NNS
mediocre JJ
medium NN JJ
meet VB VBP
meeting NN VBG
meets VBZ NNS
mega JJ
mega-crash NN
mega-crashes NNS
mega-hit JJ NN
mega-issues NNS
mega-lawyer NN
mega-mergers NNS
mega-problems NNS
mega-projects NNS
mega-resorts NNS
mega-stadium NN
melancholy JJ
meld VB
melding VBG NN
melds VBZ
mellow JJ
mellowed VBN
melt VB
meltdown NN JJ
melting VBG NN
melts VBZ
members NNS NN
memorabilia NNS
memoranda NNS
memorialized VBN
memorize VBP
memory-chip NN
men NNS
menacing JJ
mend VB
menial JJ
menstrual JJ
mental JJ
mental-health NN JJ
mention VB NN VBP
mentioned VBN VBD
mentions VBZ
menus NNS
merchandised VBN
merchandising NN VBG
merchant NN JJ
merchant-banking NN JJ
mercurial JJ
mere JJ
merge VB VBP
merged VBD VBN JJ
merit NN VB VBP
mesh VB NN
mess NN VB
met VBD VBN
metabolized VBN
metal-workers NNS
meted VBN
metric JJ NN
metropolitan JJ
mice NNS
micro JJ
micro-liquidity NN
microchannel JJ
microcomputer NN JJR
mid JJ
mid-1940s NNS
mid-1960s NNS
mid-1970s CD NNS
mid-1979 NN
mid-1980s NNS CD
mid-1987 NN
mid-1988 CD
mid-1990 NN
mid-1990s NNS CD
mid-1991 NN
mid-1992 NN
mid-1995 NN
mid-20 CD
mid-30s CD
mid-August NNP
mid-December NN
mid-July NN
mid-June NNP
mid-November NNP
mid-October NNP JJ NN
mid-September NN NNP
mid-afternoon JJ NN RB
mid-conversation NN
mid-season NN
mid-week NN
midcontinent JJ
middle JJ NN
middle-class NN JJ
middlemen NNS
middling JJ
midlevel JJ
midmorning NN
midrange JJ NN
midsize JJ
midsized JJ VBN
midsized-car NN
midtown JJ NN
midweek JJ NN
midwestern JJ
miffed VBD VBN
might MD NN
mighta MD|VB
mighty JJ RB
migrate VB
mild JJ
milder JJR
mildewy JJ
militant JJ
military JJ NN
military-electronics NNS
militate VB
milk NN VB
milked VBN
milky JJ
milling NN VBG
million CD JJ
million-plus JJ NN NNS
mimic VB VBP
mimics VBZ NNS
mince VB
mind NN VB
mind-set NN
minded VBD
mine NN JJ PRP VBP
mingle VBP
mini-series NN
mini-slip NN
mini-studio NN
miniature JJ NN
miniaturized VBN
minimal JJ
minimalist JJ NN
minimize VB
minimized VBN
minimum JJ NN JJ|NN
minimum-wage NN
minincomputer JJR
mining NN VBG
mininum-wage NN
miniscule JJ NN
miniseries NNS NN
ministerial JJ
minor JJ NN
minor-leaguer NN
minor-sport NN
minority NN NN|JJ
minted VBN
minus CC NN IN
minuscule JJ
minute NN JJ
minutiae NNS
mired VBN JJ
mirror VBP VB NN
mirrored VBD
mirroring NN
mirrors VBZ
misbegotten JJ
miscalculated VBD VBN
misclassified VBN
miscreant JJ
miserly JJ
misguided JJ VBN
mishandled VBD
misinterpret VB
misinterpreted VBN
misjudged VBD
mislaid VBN
misleading JJ VBG
misled VBD VBN
misplaced VBN
misrepresent VB
misrepresented VBD
misrepresents VBZ
misrouted VBN
miss VB VBP
missed VBD VBN
misses VBZ
missing VBG JJ
misspent VBN
misstated VBN VBD
misstates VBZ
mistake NN VB
mistaken VBN JJ
mistreat VB
mistress NN
misunderstood VBN
misused VBD
mitigate VB
mitigating JJ VBG
mix NN VB
mixed JJ VBN VBD
mixes VBZ
moan VB
moans VBZ
mobile JJ
mobile-home NN
mobilize VB
mobilized VBN VBD
mock JJ
mocked VBN
model NN JJ VB
modeled VBD VBN
modeling NN VBG
moderate JJ VB VBP
moderate-income JJ NN
moderated VBN
modern JJ NN
modernist JJ NN
modernize VB
modernized JJ VBN VBD
modest JJ
modified VBN JJ
modifies VBZ
modify VB
modish JJ
modular JJ
modulate VBP
moi FW
molded VBN
molding NN
moldy JJ
molecular JJ
mollified VBN
mollify VB
monetarist NN JJ
money-fund NN
money-laundering NN
money-management NN JJ
money-manager NN
money-market JJ NN
money-saving NN
money-transfer NN
monitor VB NN VBP
monitored VBN VBD JJ
monitoring VBG NN
monitors VBZ NNS
monochrome JJ
monopolize VB
monopolized VBN VBD
monopoly NN
montgolfiere FW
montgolfing NN
month-end NN
monthly JJ RB NN
monumental JJ
moonlighting VBG NN
moot JJ
mop VB
mop-up NN
moral JJ
morass NN
more JJR RBR RBR|JJR JJ JJR|RBR
more-distinctive JJR
more-established JJR
more-powerful JJR
more-senior JJR
more-volatile JJR
moreover RB
moribund JJ
morning NN
morning-session NN
mortgage NN VB
mortgage-banking NN
mortgaged VBN
mortis NN
most JJS RBS RBS|JJS JJ RB
most-contentious JJS
most-livable JJS
most-recent JJ JJS
most-respected JJS
mothballing NN
mother-in-law NN
motion-control NN
motion-picture NN JJ
motions NNS VBZ
motivate VB VBP
motivated VBN JJ
motive NN
motor-home NN
motor-vehicle NN
motorized VBN
mots FW
mount VB VBP
mountain-bike NN
mounted VBD VBN
mounting VBG JJ
mounts VBZ
mouthed VBD
move NN VB VBP
moved VBD VBN
moves NNS VBZ
movie-studio NN
moving VBG JJ NN
mow VB
mph NN JJ
much JJ RB
mucked VBN
mud-logger NN
muddied VBN
muddled VBN
mudslinging NN
muffled VBN
mulitiplier JJ
mull VB
mulls VBZ
multifamily RB JJ
multilateral JJ
multilayer JJ
multilevel JJ
multimedia NNS
multimillion JJ NN
multinational JJ
multipart JJ
multiparty NN JJ
multiple JJ NN
multipled VBD
multipleuser JJ
multiplied VBN
multiply VB VBP
multiyear JJ
mum JJ
mumbled VBN
mundane JJ
muni JJ NNS
municipal JJ NN
murdered VBN
murkier JJR
murky JJ
muscled VBD
muscular JJ
muse NN VB
muses NNS VBZ
mushroomed VBD VBN
mushy JJ
music NN
music-entertainment NN
musical JJ NN
must MD
muster VB NN
mutant JJ
mutate VB
mutated VBN
mute JJ VB
muted VBN JJ
mutilated VBN
mutual JJ
mutual-fund JJ NN
muzzles VBZ
muzzling JJ
my PRP$ JJ
myriad JJ
myself PRP
n't RB
na TO
naczelnik FW
nagging JJ NN VBG
nail NN VB
nailed VBN
name NN VB VBP
name-calling NN
name-dropper NN
name-droppers NNS
name-dropping NN NNP
name-drops VBZ
named VBN VBD
names NNS VBZ
naming VBG NN
narcotraficantes FW
narrative NN JJ
narrow JJ VB
narrowed VBD VBN
narrower JJR
narrowest JJS
narrowing NN VBG
narrowness NN
narrows VBZ
nary DT PDT
nastier JJR
nastiest JJS
nasty JJ
national JJ
national-policy NN
national-security NN
national-service JJ NN
nationalist JJ NN
nationalized VBN VBD
nationwide JJ RB
native JJ NN
natural JJ NN
natural-foods NNS
natural-gas NN JJ
natural-resources NNS
naughtier JJR
naval JJ
navigate VB
naysay VB
near IN JJ RB
near-monopolies NNS
near-monopoly NN JJ
near-mutiny NN
near-panic NN JJ
nearby JJ RB
neared VBD
nearer IN
nearest JJS IN
nears VBZ
neat JJ
necessitated VBD VBN
need VBP NN VB MD
needed VBN VBD JJ VBN|JJ
needs VBZ NNS
needy JJ
negated VBN
negative JJ NN
neglected VBN JJ VBD
negligent JJ
negotiate VB VBP
negotiated VBN VBD JJ
negotiates VBZ
negotiating VBG NN
neige FW
neighboring VBG JJ
neighborly JJ
neither DT CC RB
nemesis NN
neophyte JJ
nerdy JJ
nervousness NN
nervy JJ
nest-egg NN
nesting JJ
net JJ NN VB
nets NNS VBZ
netted VBN VBD
nettlesome JJ
network NN VB
networking NN VBG
neutral JJ
neutralized VBN
neutralizes VBZ
never RB RBR
nevertheless RB
new JJ
new-business NN JJ
new-car NN
new-generation NN
new-model JJ NN
new-product NN
new-telephone-line NN
newborn JJ
newer JJR
newest JJS
news NN
news-release NN
news-weeklies NNS
news-weekly NN
newspaper-delivery NN
newspaper-printing NN
newsworthiness NN
newsworthy JJ
next JJ IN RB
nexus NN
nibble NN
nice JJ
nicer JJR
niche-itis NN
nicked VBN
nickel NN JJ
nicknamed VBN
nifty JJ
night NN RB
nightly JJ RB
nightmarish JJ
nine CD
nine-months NNS
nine-tenths NNS
ninefold RB
ninety CD
ninth JJ
nixed VBD
no DT RB UH
no-brainer NN
no-confidence NN
no-growth NN JJ
no-loads NNS
no-no NN
noblemen NNS
noconfidence JJ
nods VBZ
nominal JJ NN
nominate VB
nominated VBN VBD
non-U.S. JJ NNP
non-`` ``
non-answer JJ NN
non-clients NNS
non-communists NNS
non-dairy-creamer NN
non-economists NNS
non-event NN
non-insurance NN
non-lawyers NNS
non-member NN
non-seamen NNS
non-user NN
non-warranty NN
nonbusiness NN
noncash JJ
noncombatant JJ
noncommercial JJ
noncommittal JJ
noncompliant JJ
noncontract JJ
noncriminal JJ
nondairy JJ
nondescript JJ
nonessential JJ
nonetheless RB
nonexistent JJ
nonfat JJ
nonfinancial JJ
nonlethal JJ
nonoperating VBG NN
nonpartisan JJ
nonperforming JJ VBG NN
nonprofit JJ
nonrecurring VBG JJ
nonresident JJ
nonresidential JJ
nonsense NN JJ
nonsocialist JJ
nonstop JJ NN
nontraditional JJ
nonunion JJ
nonvirulent JJ
nonvoting JJ
nonworking JJ
nor CC
normal JJ RB
normalize VB
north RB NN JJ
northeast RB NN JJ
northeastern JJ
northern JJ
northward RB
northwest RB
nose-dive NN
nose-dived VBD VBN
nosedive JJ NN
nosedived VBD
not RB
not-so-subtly RB
notch NN VB
notched VBD
note NN VBP VB
noted VBD VBN JJ
notes NNS VBZ
noteworthy JJ
nothing NN
notice NN VB VBP
noticed VBD VBN JJ
notified VBN VBD
notifies VBZ
notify VB VBP
notwithstanding IN RB
nouveau JJ
nouvelle JJ
novel NN JJ
now RB JJ
nowadays RB
nowhere RB
nt RB
nuclear JJ
nuclear-arms NNS
nucleus NN
nude JJ
nudge VB NN
nuisance JJ NN
nullified VBN
nullify VB VBP
numb JJ
number-crunchers NNS
numbered VBD VBN
numbing JJ
nursed VBD
nursing NN VBG
nursing-home NN
nurture VB
nurtured VBN VBD
nutritional JJ
nutty JJ
o'clock RB
oasis NN
oat-bran NN
oats NNS NN
obdurate JJ
obedient JJ
obey VBP
obfuscate VB
object VBP NN VB
objected VBD VBN
objective NN JJ
obligated VBN VBD JJ
obligatory JJ
obliged VBN JJ VBN|JJ
obliges VBZ
oblique JJ
obliterated VBN
obscene JJ
obscure JJ VB
obscured VBD
obscures VBZ
observe VBP VB
observed VBD VBN JJ
observes VBZ
obsessed JJ VBN
obsolete JJ
obsoleted VBN
obstinate JJ
obstruct VBP
obstructed VBN
obtain VB VBP
obtained VBN VBD
obviate VB
occasion NN VB
occasional JJ
occupied JJ VBN VBD
occupies VBZ
occupy VB
occupying VBG JJ
occur VB VBP
occurred VBD VBN
occurs VBZ
ocean-shipping NN
octave JJ
odd JJ
oddest JJS
oeufs FW
of IN RP RB
off RP IN RB JJ RB|IN
off-hours NNS
off-season NN
offbeat JJ
offend VB
offends VBZ
offensive JJ NN
offer NN VB VBP
offered VBN VBD JJ
offering NN VBG
offers VBZ NNS
offi NNS
office-supplies NNS
official NN JJ
officio FW
offing NN
offputting JJ
offset VBN VB VBP VBD
offsetting VBG JJ
offshore RB JJ
offshore-rig NN
offspring NN NNS
often RB
ogles VBZ
oh UH
oil-field NN JJ
oil-industry NN
oil-leasing NN
oil-patch NN
oil-price NN
oil-production NN
oil-recycling NN
oil-rig NN
oil-service NN
oil-spill NN
oily JJ
oink UH
okay JJ
ol' JJ
old JJ
old-line NN JJ
old-timers NNS
older JJR
oldest JJS
omit VB VBP
omits VBZ
omitted VBN VBD
omnibus NN JJ
omnipresent JJ
on IN RP RB
on-ramps NNS
once RB IN
one CD NN PRP CC
one-eighth NN
one-fifth NN JJ
one-fourth NN
one-half JJ NN
one-person NN
one-quarter NN
one-tenth NN JJ
one-third NN JJ RB
one-upsmanship NN
onepage JJ
oneself PRP
onetime JJ
oneyear JJ
ongoing JJ
only RB JJ
onstage RB
onto IN
onus NN
oohs UH
ooze NN VB
opaque JJ
open JJ VB VBP RB NN RP
open-door JJ NN
open-market JJ NN
opened VBD VBN
openended VBN
opening NN VBG JJ
openness NN
opens VBZ
operate VB VBP
operated VBN VBD VBD|VBN
operates VBZ
operating VBG NN
operational JJ
operative JJ NN
opinion-makers NNS
opportune JJ
opportuning NN
oppose VBP VB
opposed VBN VBD JJ
opposes VBZ
opposing VBG JJ
opposite JJ NN IN
opt VB VBP
opted VBD VBN
optical-products NNS
optimum JJ
option NN VBP
optional JJ
opulent JJ
or CC
oral JJ
orange NN JJ
orchestral JJ
orchestrated VBN VBD
ordained VBN
order NN VB IN
order-imbalance NN
order-taker NN
order-taking NN
ordered VBD VBN
orderly JJ RB
orders NNS VBZ
organ-transplant NN JJ
organizational JJ
organize VB
organized VBN JJ VBD
organized-crime NN
organizes VBZ
organizing VBG NN
oriental JJ
oriented VBN JJ
original JJ NN
originate VB
originated VBN VBP
originates VBZ
ornamental JJ
ornate JJ
ornery JJ
orphan JJ
orphaned VBN
orthodox JJ NN
other JJ
otherwise RB
ought MD
our PRP$
ours PRP JJ
ourselves PRP
oust VB
ousted VBN VBD JJ
out IN RP RB JJ NN
out-of-repair NN
out-of-staters NNS
out-smart VB
out-trade VB
outbid VB VBP
outdated JJ VBN
outdid VBD
outdistanced VBN
outdone VBN
outdoor JJ
outdoors RB
outer JJ
outfit NN VB
outfits NN NNS
outflank VB
outfly VB
outgained VBD
outgoing JJ
outgrew VBD
outgrown VBN
outlandish JJ
outlast VB
outlasted VBD
outlawed VBN JJ VBD
outleaped VBD
outline VB NN
outlined VBN VBD
outlines VBZ
outlying JJ
outmoded JJ VBN
outnumbered VBD
outpace VB VBP
outpaced VBD VBN VBP
outperform VB JJ VBP
outperformed VBN VBD
outperforms VBZ
outraged JJ VBN
outranks VBZ
outright JJ RB
outsell VB
outsells VBZ
outshine VB
outshines VBZ
outside IN JJ NN RB
outsold VBD
outspoken JJ
outstanding JJ
outstrip VB
outstripped VBD VBN
outstrips VBZ
outward RB
outweigh VBP VB
outweighed VBD VBN
over IN RP RB JJ
over-allotment NN JJ
over-allotments NNS
over-capacity NN
over-magazined VBN
over-the-counter JJ NN RB
overall JJ RB NN
overarching VBG JJ
overbid VB VBD
overblown JJ
overboard RB
overbought VBN
overbuilding NN
overbuilt JJ NN
overburden VB
overcame VBD
overcollateralized VBN
overcome VB VBN VBP
overcomes VBZ
overcommitted VBN
overcrowding NN JJ
overdone VBN
overdosed VBN
overdrawn JJ
overdue JJ
overeager JJ
overemphasize VB
overhaul NN VB
overhauled VBN
overhead NN JJ RB
overheated VBN
overlaid VBN
overlap VB VBP
overlapping VBG JJ
overlays VBZ
overlook VBP VB
overlooked VBD VBN
overlooks VBZ
overnight JJ RB
overpaid VBN VBD
overpass NN
overpay VB
overplanted VBN
overpower VB
overpriced VBN JJ
overpurchase VB
overreact VB VBP
overreacted VBN
override VB NN
overriding VBG JJ
overrode VBD
overrule VB
overruled VBN VBD
oversaw VBD VB
overseas JJ RB NN
oversee VB
overseen VBN
oversees VBZ
overshadowed VBN VBD
oversimplified VBN
oversold VBN JJ VB
overstate VB
overstated VBN VBD
overstrained VBN
oversubscribed VBN JJ
oversupply NN
overt JJ
overtaken VBN
overtaxed VBN
overthrow VB
overthrown VBN
overtime NN RB
overturn VB
overturned VBD VBN
overused VBN JJ
overvalued VBN JJ VBD
overweight NN JJ
overweighted VBN
overwhelm VB VBP
overwhelmed VBN VBD JJ
overwhelming JJ VBG
overwritten JJ
overwrought JJ
overzealousness NN
owe VBP VB
owed VBN VBD
owes VBZ
own JJ VB VBP VBN
owned VBN VBD JJ
owning VBG NN
owns VBZ
p.m RB NN
p.m. NN RB
p.m.-midnight NN
p53 NN CD
pace NN VB
paced VBN
pacified VBD
pacing NN
pack NN VB VBP
package NN VB
package-sorting NN
packaged VBN
packaged-goods NNS JJ
packages NNS VBZ
packaging NN VBG
packed VBN VBD JJ
packing VBG NN
packs NNS VBZ
padding NN
page-one JJ NN
paging NN
paid VBN VBD JJ VBN|JJ
paint NN VBP VB
painted VBN VBD JJ
painting NN VBG
pair NN VB
paired VBN
palamedes NN
palatial JJ
palazzi NNS
pale JJ VBP NN
paled VBD VB
pales VBZ
palm NN VB
palm-tree NN
paltry JJ
pampers VBZ
pan VB
pancreas NN
paneling NN
panic NN VB
panicked VBD
panicky JJ
panned VBN VBD
paper-company NN JJ
paper-goods NNS
paper-products NNS
par NN JJ IN
parachute NN VB
paragraphing NN
parallel JJ NN VB RB
parallels NNS VBZ
paralysis NN
paralyzed VBN JJ
paramount JJ
paranoid JJ
paraphernalia NNS
paraphrase VBP
parcel NN VBP VB
parched VBN JJ
pardoned VBD
pare VB
pared VBN VBD
parent NN JJ
parent-company NN
parental JJ
parenting NN
park NN VB
parked VBN VBD
parking NN VBG
parochial JJ
paroxysmal JJ
parried VBD
parry VB
part NN VB JJ
part-owner NN
part-time JJ RB
partake VB
parted VBD
partial JJ
participate VB VBP
participated VBD VBN
participates VBZ
particular JJ NN RB
parties NNS VBZ
parting NN VBG
partisan JJ
party-giving NN
pass VB VBP NN
passe JJ
passed VBN VBD
passenger-car NN
passenger-kilometers NNS
passenger-restraint NN
passers-by NNS
passes VBZ NNS
passing VBG NN
passionate JJ
passive JJ NN
past JJ NN IN RB
pastdue JJ
pasted VBN
pasteurized VBN
pastoris NN
patch NN VB
patched JJ VBN
patchwork NN JJ
patent NN JJ
patent-infringement NN
patent-law NN
patented VBD VBN JJ
patient NN JJ
patient-advocacy NN
patria FW
patriarchal JJ
patrolled VBN
patrolling NN
patronize VB
patronized VBN
patronizing VBG JJ
patterned VBN
pause NN VBP VB
paused VBD
pauses VBZ NNS
pave VB
paved JJ VBD VBN
paves VBZ
paving-equipment NN
pay VB NN VBP
pay-TV NN
pay-cable NN JJ
pay-television NN
paying VBG JJ
payroll-tax NN
pays VBZ
peace-keeping JJ NN
peak NN JJ VB
peaked VBD JJ VBN
peck VBP
peculiar JJ
pedal VB
pedaled VBN
peddle VB VBP
peddled VBN
peddles VBZ
peddling VBG NN JJ
pedestrian JJ NN
peelback JJ
peeled VBN
peer VBP VB NN
peers NNS VBZ
peg VB VBP
pegged VBN VBD
pegs VBZ
pell-mell NN
penalize VB
penalized VBN
penalizes VBZ
pence NN NNS
pending VBG VBG|JJ JJ IN
penetrate VB
penetrated VBN
penned VBN
penny-stock JJ NN
penny-stockbroker NN
pension-fund JJ NN
people NNS NN
peopled VBN
peppered VBD
peppy JJ
per IN FW
per-share JJ NN
per-subscriber NN
perceive VBP
perceived VBN VBD
perceives VBZ
perceptiveness NN
perched VBN
peremptory JJ
perennial JJ
perestroika FW NN
perfect JJ
perfected VBN
perform VB VBP
performed VBN VBD
performer NN JJ
performing VBG NN
performing-arts NNS
performs VBZ
perhaps RB
periodontal JJ
peripheral JJ
perished VBN
peritoneal JJ
perk JJ
perked VBN VBD
perky JJ
permanent JJ
permeated VBD
permissible JJ NN
permit VB VBP NN
permits VBZ NNS
permitted VBN VBD
perpetrated VBN
perpetual JJ
perpetuate VBP VB
perpetuates VBZ
perplexing JJ
persecuted VBN
pershare JJ
persist VB VBP
persisted VBD
persistent JJ
persists VBZ
personal JJ NN
personal-care JJ NN
personal-computer NN
personal-injury JJ NN
personal-property NN
personalize VB
personalized VBN JJ
personnel NNS JJ NN
perspective NN
persuade VB
persuaded VBD VBN
persuades VBZ
persuasiveness NN
pertains VBZ
pertinent JJ
perturbed VBD
pertussis NN
peruse VB VBP
pervade VBP
pervaded VBD
perverse JJ
pesticide-reform NN
pet NN JJ
petite JJ
petition NN VB
petitioned VBD
petrochemical NN
pettiness NN
petty JJ
petulant JJ
phantom JJ
pharmaceutical JJ NN
phase NN VB
phase-out NN
phased VBN VBD
phenomena NNS
phenomenal JJ
phone NN VBP
phone-company NN
phoned VBD VBN
phones NNS VBZ
phoney JJ
phony JJ NN
photo NN JJ
photocopy VB
photofinishing NN
photographed VBN
photographs NNS VBZ
photosynthesis NN
phrasing NN
physical JJ NN
physics NN NNS
pianist-comedian NN
pick VB NN VBP
picked VBD VBN
picketing NN
picking VBG NN
picks VBZ NNS
picky JJ
picnic NN
picture NN VBP
picture-postcard NN
picture-taking NN
pictured VBN
pictures NNS VBZ
pie-in-the-sky NN
piece NN VB
pieced VBN
piecemeal RB
pile NN VB VBP
piled VBD VBN
piles NNS NN
pilloried VBN
pilot NN JJ
pilot-seniority NN
pilote FW
pin VB NN
pin-pointed VBN
pinball-parlor NN
pinch NN VB
pinched VBN VBD
pine VBP
ping VB NN
pink JJ
pinned VBN
pinning VBG NN
pinpoint VB
pinpointed JJ VBN
pins NNS VBZ
pioneer NN VB
pioneered VBD
pioneering JJ
piped VBD VBN
piquant JJ
pirated VBN
piroghi NNS
piston-brake NN
pit NN VB
pitch NN VB VBP
pitched VBN VBD JJ
pitcher-coach NN
pitches NNS VBZ
pitching VBG NN
pitchmen NNS
pithiest JJS
pithy JJ
pits NNS VBZ
pitted VBN VBD
pivot VB
pivotal JJ
pizzas-with-everything NNS
placate VB
placated VBN
place NN VB VBP
placed VBN VBD
places NNS VBZ
placid JJ
placing VBG NN
plague VB
plagued VBN VBD
plaid NN JJ
plain JJ RB NN
plan NN VBP VB
planned VBN VBD JJ
planning NN VBG
plans NNS VBZ VBP
plant NN VB
plant-science NN
planted VBN VBD
planting VBG NN
plastic NN JJ
plastics-industry NN
platter JJ
play VB NN VBP
played VBD VBN
playfulness NN
playing VBG NN JJ
plays VBZ NNS
plea NN VB
plead VB
pleaded VBD VBN
pleasant JJ
please VB UH VBP
pleased JJ VBN VBD
pleases VBZ
pleasing NN VBG JJ
pleasure-boat NN
pledged VBD VBN
pledges NNS VBZ
plenty NN RB JJ
pliant JJ
plies VBZ
plods VBZ
plot NN VB
plotted VBD
plow VB NN
plowed VBN VBD
plows VBZ
pluck VB
plucked VBN
plug NN VB VBP
plugged VBD
plumbing NN
plummet VB VBP NN
plummeted VBD VBN
plunge NN VB VBP
plunged VBD VBN
plunges NNS VBZ
plunging VBG NN
plus CC IN NN RB JJ
plush JJ
pocket NN VB
pockets NNS VBZ
pockmarked VBN
poignant JJ
point NN VBP VB JJ
pointed VBD VBN JJ
points NNS VBZ
poised VBN
poison NN JJ
poison-pill JJ NN
poisoned VBN
poisoning NN
poked VBD
pokes VBZ
polar JJ
polarized VBN
police NN NNS VB
policy-makers NNS
policy-making NN JJ VBG
polish VB NN
polished JJ VBN VBD
polishing VBG|NN NN
polite JJ
political-corruption NN
politicized VBN JJ
politicking NN
politico-plaintiffs NNS
politics NNS NN
poll NN JJ VB
polled VBN VBD
pollen-producing VBG
pollinate VBP VB
pollinated VBN
polling NN
polls NNS VBZ
pollute VB
pollution-control JJ NN
pollution-reduction NN
ponder VB VBP
ponderousness NN
ponied VBD
pontificate VBP
pool NN VBP
pooled VBN JJ
poor JJ NN NNP
poorer JJR RBR
poorer-quality JJR
poorest JJS
pop NN VB VBP JJ
pops VBZ
popular JJ
popularize VB
popularized VBD VBN
populate VB
populated VBN JJ
populist JJ NN
pored VBN VBD
pores VBZ
pork-barrel JJ NN
pork-barrelers NNS
pork-barreling NN
port NN JJ
portable JJ NN
portend VB
portends VBZ
portray VB VBP
portrayed VBN VBD
portrays VBZ
pose VB VBP
posed VBN VBD
poses VBZ
posh JJ
position NN VB
position-squaring NN
positional JJ
positioned VBN VBD
positioning NN
positions NNS VBZ
positive JJ NN
possess VBP VB
possessed VBD VBN
possesses VBZ
possible JJ RB
post NN VB IN JJ
post-Oct NNP
post-World NNP JJ
post-production NN JJ
postal JJ
posted VBD VBN JJ
postmarked VBN
postpone VB VBP
postponed VBN VBD
posts NNS VBZ
posturing NN VBG
postwar JJ
pot NN VB
potent JJ
potential JJ NN
pounce VB
pound NN VB
pounded VBN
pour VB VBP
poured VBD VBN
pours VBZ
power NN VB
power-generation NN JJ
power-hitter NN
power-plant NN
power-surge NN
power-tool NN JJ
powered VBN
practice NN VB
practiced VBN VBD JJ
practicing VBG NN
praise NN VBP VB
praised VBD VBN
praises VBZ NNS
praiseworthy JJ
pre-approved JJ VBN
pre-bankruptcy NN
pre-eminence NN
pre-empt VB
pre-empted VBD
pre-kindergarten NN
pre-noon NN
pre-register VB
pre-registered VBN JJ
pre-signed VBN
pre-tested VBN
pre-trial JJ NN
pre-try VB
preach VBP VB
preachiness NN
preaching VBG NN
preamble NN
preapproved VBN
prearranged VBN
precede VB
preceded VBN
precedent NN JJ
precedes VBZ
preceding VBG JJ
precious-metals NNS JJ
precipitated VBD
precise JJ
preclude VB
precluded VBN JJ
precludes VBZ
precursory JJ
predates VBZ
predawn JJ
predetermined VBN
predicated VBN
predict VBP VB
predict\/advocate VBP
predicted VBD VBN
predicting VBG NN
predicts VBZ
predispose VB
prefectural JJ
prefer VBP VB
preferential JJ
preferred JJ VBN VBD VBG
preferred-share JJ NN
preferred-stock JJ NN
prefers VBZ
preflight JJ
pregnant JJ
prejudiced VBN JJ
prejudicial JJ
premature JJ
premier NN JJ JJR
premiere NN VB JJ
premiered VBD
premises NNS NN
premium NN JJ JJ|NN
premium-beer NN
preoccupied VBN JJ
prepaid JJ VBN VB
prepare VB VBP
prepared VBN JJ VBD
preparedness NN
prepares VBZ
prepay VB
prepositioning JJ
preppy JJ
prepurchase JJ
prerogative NN
presage VB
presages VBZ
presale NN JJ
preschool JJ
prescient JJ
prescribe VB VBP
prescribed VBN JJ
prescribes VBZ
present JJ VB NN RB VBP
presented VBN VBD
presents VBZ NNS
preserve VB
preserved VBN VBD
preserves VBZ
preset JJ
presided VBD VBN
president NN NNP
president-U.S. NN
president-elect NN
president-finance NN
president\/national-government NN
presidential JJ
presides VBZ
press NN VB VBP
press-forge NN
pressed VBN VBD
pressing VBG JJ
pressure NN VB VBP
pressured JJ VBN VBD NN
prestige NN JJ
presumed VBN JJ
presumes VBZ
pretax JJ NN
pretend VB JJ
pretrial JJ
prettier JJR
pretty RB JJ
prevail VB VBP
prevailed VBD VBN
prevailing VBG JJ
prevails VBZ
prevalent JJ
prevent VB VBP
prevented VBN VBD
prevents VBZ
prey NN VBP
price NN VB VBP
price-cutting NN JJ
price-earnings JJ NNS
price-increase NN
price-reporting NN
price-slashing NN JJ
price-stability NN
price-value NN
pricecutting NN
priced VBN VBD
prices NNS VBZ
pricey JJ
pricier JJR
priciest JJS
pricing NN VBG
pricked VBN
prickly JJ
prim JJ
primary JJ NN
primary-election NN
prime JJ
prime-time JJ NN
primed VBN
primordial JJ
princely JJ
princess NN
principal JJ NN NN|JJ
print NN VB VBP
print-shop NN
printed VBN VBD JJ
printing NN VBG VBG|NN
printing-press NN
prints NNS VBZ
prior RB JJ
priori FW
priority NN JJ
pristine JJ
private JJ RB
private-sector JJ NN
privatize VB
privatized VBN JJ
privy JJ
prize-fighter NN
prized VBN JJ
pro FW JJ NN
pro- JJ
pro-consumer NN
pro-consumption NN
pro-environment NN
pro-family NN
pro-forma FW
pro-shareholder NN
probe NN VBP VB
procedural JJ
proceed VB VBP
proceeded VBD VBN
proceeding VBG NN
proceeds NNS VBZ
process NN VB VBP
processed VBN JJ VBD
processes VBZ NNS
processing NN VBG
proclaim VB VBP
proclaimed VBD JJ
proclaims VBZ
procure VB
procurement NN JJ
prod VB
prodded VBN
prodding VBG NN
prodigal JJ
prods VBZ
produce VB VBP NN
produced VBN VBD
produces VBZ
producing VBG JJ NN
product-launch NN
product-liability NN
product-testing NN
profess VBP
professed JJ VBN VBD
professes VBZ
professional JJ NN
proffered VBN VBD
profferred VBN
proficient JJ
profile NN VB JJ
profiled VBN
profit NN VB VBP
profit-margin NN
profit-sharing NN JJ NNS
profit-taking NN NNS
profited VBD VBN
profits NNS VBZ
profittaking NN
profligate JJ
profound JJ
prognosis NN
program NN VB VBP
program-maker NN
program-trading JJ NN
programmed VBN JJ
programming NN VBG
progress NN VB
progressed VBD VBN
progresses VBZ
prohibit VB VBP
prohibited VBN VBD
prohibits VBZ
project NN VB VBP
projected VBN VBD JJ
projects NNS VBZ
proletarian JJ
proliferate VBP
proliferated VBN
prolong VB
prolonged JJ VBN
prominent JJ
promise NN VBP VB
promised VBD VBN JJ
promises VBZ NNS
promising JJ VBG
promissory JJ
promote VB VBP
promoted VBN VBD
promotes VBZ
promotional JJ
prompt VB JJ
prompted VBD VBN
prompting VBG NN
prompts VBZ
promulgated VBD
prone JJ
pronounced VBN JJ VBD
pronounces VBZ
proof NN JJ
proof-of-purchases NNS
prop VB
propagandize VB
propagandizes VBZ
propel VB
propelled VBD VBN
proper JJ
properties NNS NN
property-casualty NN JJ
property-claim NN
property-liability NN
property-sector NN
property\/casualty NN JJ
proportional JJ
propose VB VBP
proposed VBN JJ VBD
proposes VBZ
propped VBN VBD
proprietary JJ NN
propsed VBN
proration NN JJ
proscribed VBN
proscribes VBZ
prosecute VB
prosecuted VBN VBD
prosecutorial JJ
prospectus NN
prosper VB
prospered VBN
protect VB VBP
protected VBN VBD JJ
protectionist JJ
protects VBZ
protein-1 NN
proteins NNS VBZ
protest NN VB
protested VBD VBN
protests NNS VBZ
proud JJ
prove VB VBP
proved VBD VBN JJ
proven VBN JJ
proverbial JJ
proves VBZ
provide VB VBP
provided VBN VBD
provides VBZ
provincial JJ
proving VBG NN
provisional JJ
provoke VB
provoked VBN VBD
provoking VBG JJ
prowess NN
proxy NN JJ
prudent JJ
prudential JJ
prune VB
pruned VBN
pruning NN
prying JJ
pseudo-lobbyists NNS
public JJ NN RB
public-TV NN
public-health NN
public-housing NN
public-interest JJ NN
public-policy NN
public-relations NNS NN JJ
public-works NNS JJ
publicize VB
publicized VBN JJ
publish VB
published VBN VBD JJ
publishes VBZ
publishing NN VBG
puckish JJ
pudding NN
pull VB VBP NN
pull-backs NNS
pull-out NN
pulled VBD VBN
pulls VBZ NNS
pummel VB
pummeled VBN VBD
pummeling NN
pump VB NN VBP
pumped VBN VBD
punch NN VB VBP
punched VBD VBN
punching NN VBG
punchy JJ
pungent JJ
punish VB
punished VBN
punky JJ
puny JJ
pur-poises NNS
purchase NN VB VBP
purchased VBN VBD JJ
purchases NNS VBZ
purchasing VBG NN VBG|NN
pure JJ
purge VB
purged VBN VBD
purges VBZ
purhasing NN
purple JJ
purport VBP
purports VBZ
purrs VBZ
purse-snatchings NNS
pursuant JJ
pursue VB VBP
pursued VBN VBD JJ
pursues VBZ
pursuing VBG NN
push VB NN VBP
pushed VBN VBD
pushes VBZ
pushy JJ
pussy-willow NN
put VB VBN VBD NN VBP JJ VBP|VB
put-option NN
puts VBZ NNS
puzzle NN VB
puzzled VBN VBD
puzzling JJ
quack UH
quacks NNS VBZ
quadrennial JJ
quadrupled VBN VBD
quadruples VBZ
quadrupling NN VBG
quaint JJ
qualified VBN JJ VBD
qualifies VBZ
qualify VB VBP
quality NN JJ JJ|NN
quandary NN
quantified VBN
quantify VB
quarrel VB
quarter-point NN
quarterly JJ NN RB
quashed VBD VBN
quell VB
queried VBN
queries NNS VBZ
question NN VBP VB
questioned VBD VBN
questioning VBG JJ
questions NNS VBZ
quick JJ RB
quicken VB
quicker JJR RBR
quickest JJS
quiescent JJ
quiet JJ NN VB
quieted VBN VBD
quintessential JJ
quintuple RB
quipped VBD
quips VBZ NNS
quirky JJ
quisling NN
quit VBD VB VBP VBN
quite RB PDT
quits VBZ
quiz NN VB
quo NN FW
quota-cheaters NNS
quote NN VB VBP
quoted VBN VBD
quotes NNS VBZ
r LS NN SYM
rabid JJ
race-car NN
raced VBD
racial JJ
racing VBG NN
racist JJ NN
racked VBN VBD
racketeering NN VBG
racy JJ
radar-eluding VBG
radiant JJ
radio-station NN
rage NN VB
raged VBD VBN
raid NN VB
raided VBN VBD
raiding VBG NN
rail-car NN
railing NN
rails NNS VBZ
rain NN VB
rained VBD
rainier JJR
raise VB NN VBP
raised VBD VBN
raises VBZ NNS
raising VBG NN
raison FW
raked VBD
rallied VBD VBN
rallies NNS VBZ
rally NN VB VBP
rallying VBG NN
rambled VBD
rammed VBD
ramp NN VB
rampant JJ
ramshackle JJ
ran VBD
rand NNS NN
random JJ
randomness NN
rang VBD
range NN VBP VB
ranged VBD VBN
ranges NNS VBZ
rank NN VB VBP JJ
ranked VBD VBN
ranking JJ VBG NN
rankled VBN
ranks NNS VBZ
raped VBN VBD
rapeseed NN
rapid JJ
rapidement FW
rare JJ
rarefied VBN
raring JJ
rash NN JJ
rat NN VB
rata JJ
rate NN VB VBP
rate-mortgages NN
rated VBN VBD
rates NNS VBZ
rather RB
ratified VBD VBN
ratify VB
rating NN VBG
ratings-getter NN
rational JJ
rationalize VB
rationed VBN
rattle VB
rattled VBN JJ VBD
ravaged VBN
rave VB
raves VBZ
raw JJ
raw-material NN
raw-materials NNS JJ
razed VBN
re-creactions NNS
re-creating NN
re-creation NN
re-creations NNS
re-elected VBN JJ VBD
re-election NN
re-emerge VB
re-emergence NN
re-emphasize VBP
re-enacting VBG
re-enactment NN
re-enactments NNS
re-enter VB
re-entered VBD
re-entering VBG
re-establish VB
re-establishing VBG
re-evaluate VB VBP
re-evaluating VBG
re-examination NN
re-examine VB
re-exports NNS
re-supplied VBN
reach VB VBP NN
reached VBN VBD
reaches VBZ NNS
reaching VBG NN
react VB VBP
reacted VBD VBN
reactivated VBD VBN
reacts VBZ
read VB VBN VBP VBD NN VBD|VBP VBP|VBD
readied VBD
readiness NN
reading NN VBG
readmit VB
reads VBZ
ready JJ RB
reaffirm VB
reaffirmed VBD
reaffirms VBZ
real JJ RB NN
real-estate NN JJ
real-estate-investment NN
realestate VB NN
realign VB
realigned VBD
realize VB VBP
realized VBD VBN
realizes VBZ
reallocate VB
reallocated VBN
reap VB
reaped VBN VBD
reappointed VBN
reapportion VBP
reappraise VB
reappraised VBN VBD
rear JJ NN
rear-seat NN
reared VBN
rearing VBG NN
rearm VB
rearrange VB
rearranges VBZ
reason NN VBP VB
reasoned VBD VBN
reasoning NN
reasons NNS VBZ
reassert VB
reasserts VBZ
reassess VB NN
reassigned VBD VBN
reassume VB
reassure VB
reassured VBN VBD
reassuring JJ VBG
reauthorize VB
rebel NN JJ
rebelled VBD
reborn JJ
rebound NN VB
rebounded VBD VBN NN VB
rebounds VBZ NNS
rebuffed VBN VBD
rebuild VB
rebuilding VBG NN
rebuilt VBN
rebuked VBD
rebut VB
rebuts VBZ
rebutted VBN
recalcitrant JJ
recalculated VBD
recall VB NN VBP
recalled VBD VBN
recalls VBZ NNS
recanted VBN VBD
recapitalized VBN
recapture VB
recede VBP
receivable NN JJ
receivables NN NNS
receive VB VBP
received VBD VBN JJ
receives VBZ
receiving VBG NN
recent JJ
recentralized VBN
recess NN
recessed VBN
recipient JJ NN
reciprocal JJ
recites VBZ
recklessness NN
reckon VBP VB
reckoned VBN
reckoning NN VBG
reckons VBZ
reclaim VB VBP
reclaimed VBN
reclaims VBZ
reclassified VBD
recognize VB VBP
recognized VBN VBD
recognizes VBZ
recombinant JJ
recommend VB VBP
recommended VBD VBN JJ
recommends VBZ
reconcile VB
reconciles VBZ
reconnect VB
reconsider VB
reconsidered VBN
reconstruct VB
reconstructed VBD JJ VBN
record NN JJ VB
record-keeping NN JJ
recorded VBN VBD JJ
recording NN VBG
recordkeeping NN
records NNS VBZ
recounted VBD VBN
recounts VBZ
recoup VB
recouped VBD VBN
recover VB VBP
recovered VBD VBN
recovers VBZ
recraft VB
recreate VB
recreational JJ
recreational-vehicle NN JJ
recruit VB NN
recruited VBN VBD
recruiting VBG NN
recruits VBZ NNS
rectangular JJ
rectified VBN
rectilinear JJ
recuperate VB
recurrent JJ
recused VBN
recycle VB
recycled VBN JJ
recycles VBZ
recycling NN VBG
red JJ NN
red-flag VB
reddened VB
redder JJR
redeem VB
redeemed VBN
redeeming VBG JJ
redefine VB
redefined VBD
redeploy VB
redesign VB NN
redesigned VBN VBD
redevelop VB
redial VB
redirected VBN
rediscover VB
redistribute VB
redistricting NN
redo VB
redound VB
redraw VB
redrawn JJ
redress VB
reduce VB VBP
reduced VBN VBD JJ
reduced-instruction NN
reduces VBZ
redundant JJ
reeled VBD VBN
reestablish VB
refer VBP VB
referred VBD VBN
refers VBZ
refile VB
refinance VB
refinanced VBN VBD
refinancing NN VBG
refine VB
refined VBN JJ
refining NN VBG
reflect VB VBP
reflected VBD VBN
reflects VBZ
reflex JJ
refocus VB
refocused VBN VBD
refocuses VB
refocusing NN VBG
reform NN VB
reformed VBN
reformer NN JJ
reformist NN JJ
reformulated VBN
refractory JJ
refrain VB NN
refrained VBN
refreshing JJ VBG
refugee-assistance NN
refund NN VB
refunded VBN
refunding NN VBG JJ VBG|NN
refurbish VB
refurbished VBN
refurbishing NN VBG
refuse VB VBP NN
refused VBD VBN
refuses VBZ
refusing VBG NN
refute VB
refuted VBD
regain VB VBP
regained VBD VBN
regains VBZ
regard NN VBP VB
regarded VBN VBD JJ
regardless RB
regards VBZ
regenerate VB
regional JJ
register VB NN VBP
registered VBN VBD JJ
regret NN VB VBP
regrets VBZ NNS
regretted VBN VBD
regroup VB VBP
regular JJ
regulate VB
regulated VBN JJ
regulates VBZ
regulating VBG NN
regulators NNS VBZ
regulatory JJ
regummed VBD
rehabilitate VB
rehabilitated VBN
rehearing NN
reigned VBD
reignite VB NN
reignited VBD VBN
reimburse VB VBP
reimbursed VBN VBD
reimburses VBZ
reimpose VB
rein VB NN
reincorporated VBN
reinforce VB VBP
reinforced VBD VBN
reinforces VBZ
reinstalled VBN
reinstate VB
reinstated VBD VBN
reinsurer JJR
reintegrated VBN
reintroduced VBN
reinvent VB
reinvented VBD
reinvest VB VBP
reinvested VBN VBD
reinvigorate VB
reinvigorated VBN
reiterated VBD
reiterates VBZ
reject VB VBP
rejected VBD VBN
rejects VBZ
rejoice VBP
rejoin VB
rejoined VBD
rejuvenate VB
rekindle VB
rekindled VBN
relate VBP VB
related VBN JJ VBD
relates VBZ
relative JJ NN
relaunch VB
relaunched VBN
relax VB VBP
relaxed VBN VBD
relaxing VBG JJ
relayed VBD
release NN VB VBP
released VBN VBD
releases NNS VBZ
relegated VBN
relent VBP
relented VBD
relevant JJ
reliant JJ
relicensing NN
relied VBN VBD VB
relies VBZ
relieve VB
relieved VBN JJ VBD
relinquish VB
relinquished VBN VBD
relish NN VB
relished VBD
relishes VBZ
relive VBP
relocate VB NN
relocated VBD VBN
reluctant JJ
rely VB VBP
remade VB
remain VB VBP
remained VBD VBN
remaining VBG JJ
remains VBZ NNS
remake VB
remanded VBD
remark NN VB
remarked VBD VBN
remarks NNS VBZ
remedied VBN
remedy NN VB
remember VB VBP
remembered VBD VBN
remembers VBZ
remind VB VBP
reminded VBD VBN
reminds VBZ
reminiscent JJ NN
remiss JJ
remodeled VBN
remodeling VBG NN
remora NNS
remote JJ
remove VB
removed VBN VBD
removes VBZ
remunerated VBN
renal JJ
rename VB
renamed VBN VBD
render VB
rendered VBN VBD
rendering VBG NN
rendezvous NN
rendezvoused VBD
renege VB
renegotiate VB
renegotiated VBN
renew VB
renewed VBN JJ VBD
renews VBZ
renounce VB
renounced VBD
renovate VB
renovated VBN
renowned JJ VBN
rent NN VB
rent-a-colonel NN
rental JJ NN
rented VBN
rents NNS VBZ
reoffered VBN
reoffering NN
reopen VB
reopened VBD VBN
reopens VBZ
reordering NN
reorganize VB
reorganized VBN
reorganizes VBZ
reoriented VBN
repackage VB
repackaged VBN
repaid VBN VBD
repainted VBN
repair NN VB VBP
repaired VBN VBD
repairs NNS VBZ
repassed VBN
repatriate VB
repay VB
repeal NN VB
repealed VBN
repeals VBZ
repeat NN VB
repeated VBN VBD JJ
repeating VBG JJ
repeats VBZ NNS
repel VB VBP
repellent JJ
replace VB VBP
replaced VBN VBD
replacement-car NN
replaces VBZ
replaster VB
replenish VB
replenished VBN
replete JJ
replicate VB
replicated VBN
replied VBD VBN
replies VBZ NNS
reply VB NN
repond VB
report NN VB VBP
reported VBD VBN JJ
reporting VBG NN
reportorial JJ
reports NNS VBZ
reposed VBN
reposition VB
repositioning NN
repossess VB
represent VB VBP
representative NN JJ
represented VBD VBN
represents VBZ
repressed JJ VBN
repriced VBN
reprint VB
reprinted VBN
reprints VBZ
reproduce VB
reproduced VBD
reprove VB
reptilian JJ
republic NN
repudiate VB
repurchase NN VBD VBN VB JJ
repurchased VBD VBN
reputed JJ VBN
request NN VB VBP
requested VBD VBN
require VB VBP
required VBN VBD JJ
requires VBZ
requisite JJ
requisitioned VBD
reroofing NN
rerouted VBN
reschedule VB
rescheduled VBN VBD
rescind VB
rescinded VBD
rescue NN VB
rescued VBD
rescues VBZ
research NN VB
research-and-development NN
researched VBN
researches VBZ
resell VB VBP JJ
reseller JJR NN JJ
resells VBZ
resemble VB VBP
resembles VBZ
resent VBP VB
resented VBD
reserve NN VBP VB JJ
reserve-building NN
reserved VBN VBD JJ
reserves NNS VBZ
reset NN VB JJ
reshape VB
reshaped VBN VBD
reshuffle NN VB
reshuffled VBD
reshuffling VBG NN
reside VB
resided VBN
resident NN JJ
residential JJ
resides VBZ
residual JJ
resign VB
resigned VBD VBN JJ
resilient JJ
resist VB VBP
resistant JJ NN
resisted VBN VBD
resists VBZ
resold VBN VB VBP
resolve VB NN
resolved VBN VBD
resonant JJ
resonate VB
resonated VBD
resonates VBZ
resort NN VB VBP
resort-casino NN
resorts NNS VBZ
resounding JJ
respect NN VB
respected VBN JJ VBD
respects VBZ NNS
respiratory JJ
respond VB VBP NN
responded VBD VBN
responds VBZ
rest NN VB VBP VB|NN
restart VB
restarted VBN VBD
restate VB
restated VBN JJ VBD
rested VBD
restore VB
restored VBN VBD
restrain VB
restrained JJ VBN VBD
restraining VBG JJ NN
restrict VB VBP
restricted VBN JJ VBD
restricts VBZ
restructure VB NN VBP
restructured VBN VBD
restructures VBZ
restructuring NN VBG
rests VBZ
restyled VBN JJ
resubmit VB
result NN VB VBP
resultant JJ
resulted VBD VBN
resulting VBG JJ VBG|JJ
results NNS VBZ
resume VB VBP NN
resumed VBD VBN
resumes VBZ NNS
resurfaced VBD VBN
resurgent JJ
resurrect VB VBP
resurrected VBD VBN
resurrects VBZ
resuscitate VB
retablos FW
retail JJ NN VB VBP
retail-sales JJ NNS
retail-volume NN
retailing NN VBG
retails VBZ
retain VB VBP
retained VBD VBN JJ
retains VBZ
retard VB
rethink VB NN
reticent JJ
retinal JJ
retire VB VBP
retired VBD VBN JJ
retires VBZ
retools VBZ
retorts NNS VBZ
retraced VBD
retracted VBD
retreat NN VB
retreated VBD VBN
retrench VBP
retrieve VB VBP
retrieved VBD VBN
retrofit VB
retrofitting NN
retrospective NN JJ
retry VB
return NN VB VBP JJ
returned VBD VBN
returns NNS VBZ
reunite VB
reunited VBN
reused VBN
revalued VBN
revamp VB
revamped VBN VBD
revamping VBG NN
reveal VB VBP
revealed VBD VBN
revealing VBG JJ
reveals VBZ
revel VBP
reverberate VB
reverberated VBN
reverential JJ
reverse VB NN JJ RB
reverse-engineering NN
reversed VBD VBN JJ
reverses VBZ
reverted VBN
reverts VBZ
review NN VB VBP
reviewed VBN VBD
reviews NNS VBZ
revise VB
revised VBN JJ VBD
revisit VB
revisited VBN
revisits VBZ
revitalization NN JJ
revive VB VBP
revived VBN VBD
revoke VB
revoked VBN
revolutionary JJ NN
revolutionize VB
revolutionized VBD
revolve VB
revolves VBZ
revolving JJ VBG
revved VBN
reward NN VB
rewarded VBN
rewarding JJ VBG
rewards NNS VBZ
reworked VBN
rewrapped NN
rewrite VB
rewritten VBN
rhetoric NN
rhymed VBD
rhymes VBZ
ribosomal JJ
rich JJ
riche JJ
richer JJR
riches NNS NN
richest JJS
richness NN
rickety JJ
rid JJ VB VBN|JJ VBN VBD
ride NN VB VBP
ridiculed VBN
ridicules VBZ
riding VBG NN
rife JJ
rigged VBN VBD
right NN JJ RB
right-angling NN
right-hander NN
right-to-lifers NNS
right-wing JJ NN
right-wingers NNS
righted VBN
rightward JJ
rigid JJ
rigueur FW
rile VBP
riles VBZ
rim NN VBP
ring NN VB VBP
ringing VBG NN
rings NNS VBZ
rioting NN
ripe JJ
ripen VBP
ripens VBZ
ripped VBD VBN
ripple NN JJ VBP
rise NN VB VBP
risen VBN
rises VBZ NNS
rising VBG JJ NN
risk NN VB VBP
risk-taking NN
risked VBD
riskier JJR NN
riskiest JJS
riskiness NN
risks NNS VBZ
risky JJ
ritorno FW
ritzy JJ
rival JJ NN VB
rivals NNS VBZ
riveted VBD VBN
riveting JJ
rivets NNS VBZ
road-building NN
roadbed NN
roam VBP
roamed VBD
roaring NN VBG
roars VBZ
robbed VBN
robust JJ
rock NN VB
rocked VBN VBD
rocket-motor NN
rocket-propulsion NN
rocketed VBD
rocky JJ
rode VBD
roil VB
role-playing NN
roll NN VB VBP
roll-call NN JJ
roll-out NN
rolled VBN VBD JJ
roller-coaster NN
rollercoaster JJ
rolling VBG JJ NN
rolling-steel NN
rolls NNS VBZ
romanticized VBN
romp VBP
roofing NN
roomful NN
roost VB
rooster-comb NN
root NN VB VBP
root-canal NN
rooted VBN JJ
rope-sight NN
rose VBD NN VBP
rose-gold NN
rosier RBR JJR
rosy JJ
rotate VB
rotated VBD
rote JJ
rotted VBN
rotten JJ
rough JJ
roughed VBD
rougher JJR
roughhewn JJ
round NN VB JJ VBP
round-trip JJ NN
rounded JJ VBN VBD
routed VBN
routes NNS VBZ
routine JJ NN
routing VBG NN
row NN VB
rowdy JJ
rowed VBD
rowing NN
royal JJ NN
rub NN VB VBP
rubbed VBD
rubber-necking VBG
rubber-stamp VB
rubbish JJ NN
rubble NN
ruble NN FW
rubric NN
rubs VBZ NNS
rude JJ
ruffled VBN
ruin VB VBP
ruined VBN
rule NN VB VBP
rule-making NN
ruled VBD VBN
rules NNS VBZ
ruling NN VBG JJ
ruling-party NN
rumble VBP
rumbled VBD
rumbles VBZ
ruminated VBD VBN
rumored VBN JJ VBD
rumors NNS VBZ
run VB VBN NN VBP VBD
run-ins NNS
run-up NN
runaway JJ
rung VBN
runners-up NNS
running VBG NN JJ RB
runny JJ
runs VBZ NNS
ruptured VBD VBN JJ
rural JJ
rush NN VB VBP
rushed VBD VBN
rushes VBZ
rusted VBN
rusticated VBN
rusting JJ
rustling NN
rusty JJ
s VBZ PRP
sabotage NN VB
sacked VBD
sacrifice VB NN
sacrifices VBZ NNS
sad JJ
sadder JJR
saddled VBN VBD
safe JJ NN
safeguard VB
safeguarded VBN
safekeeping NN
safer JJR
safest JJS
safety NN VB
safety-seat NN
sagged VBD VBN
sagging VBG NN VBG|JJ
said VBD VBN
sailed VBD
sailing NN VBG
saintly JJ
salary NN
salarymen NNS
sale-purchase NN
sales NNS JJ
sales-tax NN JJ
salesmen NNS
salespeople NN NNS
salted VBD
saluted VBD
salvage VB NN
salvaged VBN
salve VB
same JJ
same-store CD JJ
sampled VBN
samurai NN FW
sanctioned VBN
sanctions NNS VBZ
sanctuary NN
sandwiched VBN VBD
sandy JJ
sang VBD
sanguine JJ NN
sanitize VBP
sanitized VBN
sank VBD
santos FW
sap VB
sapiens JJ
sapped VBN
sarakin FW
sassy JJ
sat VBD VBN
satellite NN JJ
satellite-assembly NN
satisfactory JJ
satisfied VBN JJ VBD VBN|JJ
satisfies NNS VBZ
satisfy VB
satisfying VBG JJ
saturate VB
saturated VBD VBN
saucy JJ
sausage-grinder NN
save VB VBP IN
saved VBN VBD
saves VBZ
saving VBG NN
savings NNS NN
savings-and-loan JJ NN
savor VB
savored VBD
savvier JJR
savviest JJS
savvy JJ NN
saw VBD NN
say VBP VB NN UH NNP
saying VBG NN
says VBZ
scale NN VB
scaled VBN VBD
scaling VBG NN
scammed VBD
scamper VBP
scan VB
scandal-stench NN
scandalized VBD
scans VBZ NNS
scant JJ
scape VB
scapegoating NN
scarce JJ
scarcest JJS
scare VB NN VBP
scare-tactic NN
scared VBN JJ VBD RB
scares VBZ NNS
scarlet JJ
scarred VBN
scarves NN
scathing JJ
scattered VBN JJ
schedule NN VB
scheduled VBN JJ VBD
scheduling NN VBG
scheming JJ VBG
schizoid JJ
schmoozing NN
schmumpered VBD
scholarly JJ
school NN VB
school-board NN
school-district NN
school-lunch NN
schoolchildren NN NNS
schooling NN
sclerosis NN
scoff NN VBP
scoffed VBD
scoffs VBZ
scold VB
scolded VBN
scoop NN VB
scooped VBD
scoops VBZ NNS
scooted VBD
score NN VBP
scored VBD VBN
scorekeeping NN
scorn NN VBP VB
scotched VBD
scour VB
scout NN VB
scowl VBP
scowls VBZ
scramble NN VBP
scrambled VBD VBN JJ
scrap VB NN
scrape VB NN
scrapped VBN VBD
scrapping VBG NN
scrappy JJ
scraps NNS VBZ
scratch NN VB VBP
scratched VBN
scream NN VB VBP
screamed VBD
screams VBZ
screeched VBD
screeching VBG JJ
screed NN
screen NN VB
screened VBD
screening NN VBG
screens NNS VBZ
screwball NN JJ
screwed VBD VBN
scribbled VBD
scrimped VBD
scrounge VBP
scrounged VBD
scrutinize VB
scrutinized VBN VBD
scurry VB
scuttle VB
scuttled VBD VBN
se FW
seaborne JJ
seal NN VB
sealed VBN JJ VBD
seamen NNS
seamier JJR
seamy JJ
search NN VB VBP
searched VBD
searches NNS VBZ
searing JJ VBG
seasonal JJ
seat-belt NN
seated VBN
seating NN VBG
seats NNS VBZ
secede VB
second JJ NN RB LS
second-guess VB
second-guessed VBN
second-guessing NN
second-in-command NN
second-quarter JJ NN
secondbiggest JJS
secret JJ NN
secretarial JJ
secretary NN
secretary-general NN JJ
sectarian JJ
section NN ,
sectional JJ
sectorial JJ
secure VB JJ VBP
secured VBN JJ VBD
securities-firm NN JJ
securities-industry NN
securities-law NN
securitiess NN
sedate JJ
sedative NN
seduce VB
see VB VBP
seed NN
seeded VBN
seedy JJ
seek VB VBP
seeks VBZ
seem VBP VB
seemed VBD VBN
seeming JJ
seems VBZ
seen VBN JJ
seeped VBD
sees VBZ
seesaw JJ NN
seething VBG JJ
segregate VB
segregated VBD JJ
seisho FW
seize VB VBP
seized VBN VBD
seldom RB
select VB JJ VBP
selected VBN VBD JJ
selecting VBG NN
selects VBZ
self-awareness NN
self-confidence NN
self-control NN
self-criticism NN
self-definition NN
self-destructed VBD
self-discipline NN
self-employment NN
self-esteem NN
self-expression NN
self-help NN
self-incrimination NN
self-insure VBP
self-interest NN
self-portrait NN
self-reform NN
self-regulation NN
self-reinsure VB
self-righteousness NN
self-starters NNS
self-tilth NN
selfish JJ
sell VB VBP NN JJ
sell-off NN NNS
sell-offs NNS
selling VBG NN JJ
sells VBZ
semi-annually RB
semi-celebrities NNS
semiannual JJ
semicircular JJ
semiconductor-manufacturing NN
semifinished VBN
semiliterate JJ
semimonthly RB|JJ
senatorial JJ
send VB VBP
sends VBZ
senior JJ NN
seniority-list NN
sensational JJ
sense NN VBP VB
sensed VBD
sensible JJ NN
sensitize VB
sensory JJ
sensual JJ
sent VBD VBN
sentenced VBN VBD
sentencing NN VBG
sentimental JJ
separate JJ VB VBP
separated JJ VBN
separatist JJ
sepsis NN
sequester NN VB VBP
sequestered VBN
sequestering NN
serene JJ
serial NN JJ
series NN NNS
seriousness NN
serpentine JJ
serve VB VBP
served VBD VBN
serves VBZ
service NN VB
service-center NN
service-industry NN JJ
serviced VBN
services NNS VBZ
servicing NN VBG
servile JJ
set VBN VB VBD NN VBP JJ
sets NNS VBZ
setting VBG NN
settle VB VBP
settled VBN VBD JJ
settles VBZ
settling VBG NN
seven CD
seventh JJ
sever VB
several JJ
severance NN JJ
severe JJ
severed VBN VBD
severest JJS
sew VB
sewing NN
sewing-machine NN
sexist JJ
sexual JJ
sexy JJ
shabby JJ
shadier JJR
shadow NN VB
shadowy JJ
shady JJ
shaggy JJ
shags VBZ
shake VB NN VBP
shake-up NN
shaken VBN JJ
shakes VBZ
shaky JJ
shall MD
shallow JJ
shallower JJR
shambles NN
shape NN VB VBP
shaped VBN JJ
shapes VBZ NNS
share NN VB VBP
shared VBN VBD JJ
shareholding NN
shares NNS VBZ
sharing VBG NN
sharp JJ
sharpen VB
sharpens VBZ
sharper JJR
sharpest JJS
sharpness NN
shattered VBD VBN JJ
shave VB
shaved VBD VBN
shaves VBZ
shaving NN
she PRP
sheared VBN
shed VB VBD VBN VBP
shedding VBG NN
sheer JJ NN
shell NN VB JJ
shelled VBD
sheltered JJ VBN
shelved VBD JJ
shepherded VBD
shied VBD VBN
shield NN VB
shielded VBD VBN
shift NN VB VBP
shifted VBN VBD
shifting VBG JJ
shifts NNS VBZ
shimmered VBD
shimmering JJ
shine NN VBP VB
shiny JJ
ship NN VB VBP
shipbuilding NN
shipped VBN VBD
shipping VBG NN
shirk VB
shirt-pocket NN
shock NN VB
shocked VBN JJ VBD
shocking JJ
shockproof JJ
shoddy JJ
shoe-horn VB
shoehorned VBN
shoestring NN
shoo-in NN
shook VBD
shoot VB VBP NN
shooting VBG NN
shoots NNS VBZ
shop NN VB
shoplifting NN
shopped VBD VBN
shopping NN VBG
shopping-center NN
shore VB NN
shorn VB
short JJ RB VB
short-changing NN
short-circuited VBN
short-covering NN
short-run JJ NN
short-sellers NNS
short-selling JJ NN
short-term JJ NN NNP
shortchanged VBN
shortcoming NN
shorted VBN
shorten VB
shortened VBN
shortening VBG NN
shorter JJR
shorter-term JJ JJR
shortest JJS
shorting NN VBG
shortterm JJ
shot NN VBD VBN
should MD
shoulder NN VB VBP
shout NN VBP VB
shouted VBD
shouting VBG NN
shouts VBZ
shove VB
shoved VBD
shoves VBZ
show NN VB VBP
show-biz NN
show-stoppers NNS
showed VBD VBN
shower VB
showing VBG NN
shown VBN
shows VBZ NNS
shrank VBD
shred NN
shredded JJ VBD
shrewd JJ
shrewder JJR
shrieked VBD
shrink VB
shrinking VBG NN
shrinks VBZ
shriveled VBD
shrouded VBD
shrug VB
shrugged VBD
shrugs VBZ NNS
shrunk VBN
shucks UH
shuffled VBD
shuffling NN VBG
shun VBP VB
shunned VBD
shut VBD VBN VB
shuts VBZ NNS
shuttered JJ VBD
shuttle-busing NN
shuttled VBN VBD
shy JJ VB VBP
sick JJ
sickening JJ
sickness NN
side NN JJ VB VBP
side-by-side RB
sided VBN VBD
sidelined VBN
sidestep VB VBP
sidestepped VBD
sidesteps VBZ
sidetrack VB
sideways RB JJ
siding NN
sift VB VBP
sifted VBN
sighed VBD
sighs NNS VBZ
sightseeing NN
sign NN VB
signal NN VB VBP
signal-processing NN JJ
signaled VBD VBN
signals NNS VBZ
signed VBD VBN JJ
significant JJ
signified VBD
signify VB
signing VBG NN
signs NNS VBZ
silence NN VB
silenced VBN
silent JJ
silky JJ
silly JJ RB NN
silted VBN
silver NN JJ
silver-conspiracy NN
silvery JJ
similar JJ
similiar JJ
simmer VB
simple JJ NN
simpler JJR
simplest JJS
simplified VBN
simplify VB VBP
simply RB JJ
simulate VBP
simulates VBZ
since IN RB
sincere JJ
sing VB VBP
singing VBG NN
single JJ VB NN VBP
single-A JJ NNP
single-A-2 JJ NN
single-A-3 JJ NN
single-A-minus JJ NN
single-B JJ NN
single-B-1 JJ NN
single-B-2 JJ NN
single-B-3 JJ NN
single-B-minus NN JJ
single-family JJ NN
single-handedly RB
singled VBN VBD
sings VBZ
sinister JJ
sink VB NN VBP
sinking VBG NN
sinking-fund NN
siphon VB
siphoned VBN VBD
sipped VBD
sister NN JJ
sister-in-law NN
sit VB VBP
site-development NN
sits VBZ
sitting VBG VBG|JJ
situated VBN
six CD
six-fold RB
six-footer NN
six-packs NNS
six-shooter NN
sixfold RB JJ
sixth JJ RB
size NN VBP
sized VBD
sizzle VB
sizzling JJ VBG
sketches NNS VBZ
sketchiest JJS
sketchy JJ
skewed VBN JJ
ski NN JJ VB
ski-industry NN
skid VB VBD NN
skidded VBD VBN
skiing NN VBG
skim VB
skimp VB
skimpy JJ
skin-care NN
skip VB VBP
skipped VBD
skipper NN VB
skirmished VBN
skirmishing NN
skirted VBN
skirts VBZ
skittish JJ
skittishness NN
skyrocketed VBN VBD
skyward RB
slack NN JJ VB
slackened VBN JJ VBD
slain VBN
slam VBP
slam-dunk NN VB
slammed VBD
slap VB NN
slapped VBD VBN
slapping NN
slaps VBZ NNS
slash VB VBP NN
slashed VBD VBN
slated VBN VBD
slaughtered VBN
slaying NN
sleazy JJ
sledding NN
sleek JJ
sleep VB NN VBP
sleeping VBG NN
sleeps VBZ
sleepy JJ
slender JJ
slept VBD
slice NN VBP VB
slick JJ NN
slid VBD VBN NNP
slide NN VB
slide-packs NNS
slides NNS VBZ
slight JJ
slightest JJS
slim JJ
slimmed VBN
slimmer JJR
slimy JJ
slinky JJ
slip VB NN VBP
slipped VBD VBN
slippery JJ
slips VBZ
slipshod JJ
slithered VBD
slivered VBN
slog VB
slogs VBZ
slop-bucket NN
slopes NNS VBZ
sloppy JJ
slough VB
slow JJ VB RB
slow-growth NN
slowed VBD VBN
slower JJR RBR
slowest JJS
slowing VBG NN
slows VBZ
sluggish JJ
sluggishness NN
slump NN VBP VB
slumped VBD VBN
slumping VBG JJ
sly JJ
smack RB VBP
smacks VBZ
small JJ
small-business NN
small-company NN
small-denomination NN JJ
small-employer NN
small-incision NN
small-investor NN
smaller JJR
smallest JJS
smart JJ
smarter RBR
smartest JJS
smash NN VB
smashed VBD VBN
smashing NN VBG
smattering NN
smell NN VBP
smelled VBD
smells VBZ
smelly JJ
smelt VBN
smile NN VBP
smiled VBD
smiles VBZ NNS
smoke NN VBP VB
smoked VBD
smokes VBZ
smoking NN VBG
smoking-cessation NN
smolder VBP
smooth JJ VB
smoothed VBN
smoother JJR JJ
smoothest JJS
smother VB
smothered VBN
smug JJ
smuggle VB
smuggling NN
snack-food NN
snafus NNS
snagged VBN
snakes NNS VBZ
snap NN JJ VBP
snapped VBD VBN JJ
snappy JJ
snaps VBZ
snare VB
snatch VB
snatched VBN VBD
snazzy JJ
sneak VBP
sneaked VBD
sneaky JJ
sniff VB
sniffed VBD
sniffs VBZ
sniped VBD
sniping NN
snobbish JJ
snooty JJ
snorts VBZ
snotty JJ
snowball VB NN
snowballed VBD
snubbed VBD
snubbing VBG NN
so RB IN CC
so-called JJ NN
soak VB
soar VB VBP
soared VBD VBN
sob VB
sober JJ
sobered VBD
sobering JJ
socalled JJ VBN
social JJ
social-affairs NNS
social-studies NN
socialist JJ NN
socialize VB
sock VB
soft JJ RB
soft-drink NN JJ
soft-drinks NNS
soften VB
softened VBN VBD JJ
softening VBG NN
softens VBZ
softer JJR
softness NN
software-development NN
softwood JJ
soggy JJ
sogo-shosha NN
soil-nutrients NNS
soiled VBD
solar JJ
sold VBN VBD
soldering JJ
sole JJ NN
solemn JJ
solicit VB
solicited VBN VBD
solicits VBZ
solid JJ RB
solid-waste NN
solidified VBD
solidify VB VBP
solo NN RB|JJ JJ
solve VB
solved VBN VBD
solvent JJ
solves VBZ
somber JJ
some DT RB
someday RB
somehow RB
somersaulting JJ
something NN
sometime RB JJ
sometimes RB
somewhat RB
somewhere RB
soon RB
sooner RBR RB
soonest JJS
soothe VB
soothing JJ VBG
sore JJ
soreness NN
sorry JJ RB
sort NN VB RB
sorted VBN
sought VBN VBD
sound NN JJ VB VBP
sound\/graphics JJ
sounded VBD VBN
soundness NN
sounds VBZ NNS
sour JJ VB
soured JJ VBD VBN
souring NN
south RB NN JJ
southeast NN JJ
southeastern JJ
southern JJ
southwest JJS NN JJ RB
southwestern JJ
sovereign JJ
soviet JJ
sow VBP VB
sowed VBD
sowing NN
sows VBZ
soybean-meal NN
space-buying NN
space-science NN
space-shuttle NN
space-station NN
spaceborn JJ
spackle VB
spaghetti NNS
span NN VBP
spanking JJ NN
spanned VBD
spare JJ VB VBP
spared VBN VBD
spares NNS VBZ
spark VB NN
sparked VBN VBD
sparkling JJ
sparks VBZ NNS
sparred VBD
spawn VB
spawned VBN VBD
spawns VBZ
speak VB VBP
speaking VBG NN
speaks VBZ
spearheaded VBD VBN
special JJ NN
special-interest JJ NN
specialist NN JJ
specialize VB VBP
specialized JJ VBN
specializes VBZ
specialty NN JJ
specialty-chemical NN
specialty-chemicals NNS
specialty-metals NNS
species NNS NN
specific JJ NN
specified VBN JJ VBD
specifies VBZ
specify VB
spectacular JJ
speculate VB VBP
speculated VBD VBN
sped VBN VBD
speed NN VB
speeded VBD
speedier JJR
speeding VBG NN JJ
speeds NNS VBZ
speedy JJ
spell VB NN
spelled VBN
spelling VBG NN
spells VBZ NNS
spend VB VBP
spending NN VBG JJ VBG|NN
spends VBZ
spent VBD VBN JJ
spewed VBD
spied VBD
spies NNS VBZ
spiffy JJ
spiked JJ VBN
spill NN VB
spilled VBD VBN
spilling NN
spills VBZ NNS
spin VB NN
spin-off NN JJ
spinal JJ NN
spinning JJ VBG
spins VBZ
spiraled VBD
spiraling VBG JJ
spiralled VBD
spirited JJ VBN
spitting NN
splashed VBD
splashy JJ
splendid JJ
split NN VBN VBD VB JJ
split-finger NN
splits NNS VBZ
splitting NN JJ
spoil VBP
spoiled VBD JJ
spoke VBD
spoken VBN
spokesmen NNS
sponsor NN VB VBP
sponsored VBN VBD
sponsors NNS VBZ
spook VBP
spooked VBN VBD
spookiest JJS
sported VBD
sportif FW
sporting VBG NN
sporting-goods NNS
sports NNS VBZ
sportsmen NNS
sporty JJ
spot NN VB JJ
spotlight NN VB
spots NNS VBZ
spotted VBD VBN JJ
spotting VBG VBG|NN
spotty JJ
spout VBP
sprang VBD
sprawling VBG JJ
spread NN VBN VBD VB VBP
spreads NNS VBZ
sprightly JJ
spring NN VB
spring-brake NN
spring-training NN
springs VBZ
sprinkle VBP
sprinkled VBD
sprinkles VBZ
sprout VB VBP
spruce VB
sprung VBN
spun VBN VBD
spur VB NN
spurn VBP VB
spurned VBD VBN
spurns VBZ
spurred VBN VBD
spurs VBZ
spurt NN VBP
spurted VBD VBN
spurts NNS VBZ
sputter VBP
sputtered VBD
sputtering JJ
spy NN VB
spy-chaser NN
spy-chasing NN
spy-in-training NN
spyglass NN
squabble NN
squabbling NN
squalid JJ
squandered VBN
square JJ NN VB RB
squared VBN VBD
squat JJ
squatted VBN
squeaky RB
squeamish JJ
squeegee VBP
squeeze NN VB VBP
squeezed VBN VBD
squeezes VBZ
squelch VBP
squelched VBN
squinted VBD
stabbed VBN VBD
stabilize VB VBP
stabilized VBN VBD
stabilizes VBZ
stable JJ NN
stack VB
stacked VBN
staff NN VB
staff-reduction NN
staffed VBN
staffing NN VBG
stage NN VB VBP
staged VBD VBN
stages NNS VBZ
stagewhispers VBZ
staggered JJ VBD
staggering JJ VBG
staging NN VBG
stagnant JJ
stagnated VBD
staid JJ VBN
stain VB
stained-glass NN
stake NN VB
staked VBN
stale JJ
stalked VBN
stall VB NN
stalled VBN VBD JJ
stalls NNS VBZ
stalwart JJ NN
stamp NN VB
stampede NN VB
stampeded VBN
stanch VB
stand VB VBP NN
standard JJ NN
standard-bearer NN
standardize VB
standby JJ NN
standing NN VBG JJ
standing-room NN
stands VBZ NNS NN
standstill JJ NN
standup JJ
staphylococcus NN
staple NN JJ
stapling NN VBG
star NN JJ VB
stare VBP
stared VBD
stark JJ
stars NNS VBZ
start VB NN VBP
start-up JJ NN NNS
start-ups NNS
started VBD VBN
starter JJ NN
starting VBG JJ NN
startled VBD
startling JJ
starts VBZ NNS VBP
starve VB
starved VBN
stash VB
stashed VBD
state NN VBP VB
state-court NN
stated VBN VBD JJ
stately JJ
states NNS VBZ
statesmen NNS
statewide JJ RB
stationed VBN
statist JJ
statistic NN
status NN FW
statutory JJ
staunch JJ VB
staunchest JJS
stave VB
stay VB VBP NN
stayed VBD VBN
staying VBG NN
stays VBZ NNS
steadfast JJ
steadied VBD VBN
steadier JJR
steadiness NN
steady JJ RB
steadying JJ
steal VB VBP
steals VBZ
steam-generating NN
steamed VBD VBN
steel-ingot NN
steel-quota NN
steel-service-center NN
steelmaking NN
steely JJ
steep JJ NN
steeper JJR
steepest JJS
steepness NN
steer VB
steered VBD VBN
steering VBG NN
steers VBZ
stellar JJ
stem VB VBP NN
stemmed VBD VBN
stems VBZ
step NN VB VBP
stepped VBD VBN
stepping VBG JJ
steps NNS VBZ
stereo NN JJ
sterile JJ
sterilize VB
sterilized VBN
sterling NN JJ
stern JJ
stewed JJ VBD
stick VB VBP NN
stick-and-carrot NN
sticker-shock NN
stickier JJR
stickiness NN
sticking VBG NN JJ
sticks VBZ NNS
sticky JJ
stiff JJ NN
stiffening JJ
stiffer JJR
stiffest JJS
stifle VB
stifles VBZ
still RB JJ
still-raging VBG
stimulate VB
stimulated VBN
stimulating VBG JJ
stimuli NNS
stimulus NN
sting NN
stingier JJR
stinging JJ VBG
stingy JJ
stink VBP
stipulate VB
stipulated VBD
stipulates VBZ
stir VB VBP
stirred VBD
stirs VBZ
stitched VBN
stock NN VB JJ
stock-appreciation NN
stock-exchange NN
stock-fund NN
stock-index JJ NN NNS
stock-index-futures NNS
stock-manipulation NN JJ
stock-market NN JJ
stock-option NN JJ
stock-options NNS
stock-picking JJ NN
stock-price JJ NN
stock-registration NN
stock-taking NN
stock-trader NN
stock-trading NN JJ
stocked VBN
stocking VBG NN
stockpile NN VB
stockpiling NN
stocks NNS VBZ RB
stodgy JJ
stoke VB
stoked VBN
stole VBD
stolen VBN JJ
stolid JJ
stomach NN VB
stomped VBD
stomping VBG NN
stoned VBN
stonewalled VBD
stood VBD VBN
stop VB NN VBP
stop-loss NN JJ
stop-motion JJ NN
stop-payment NN
stopgap NN JJ
stopped VBD VBN
stopping VBG NN
stops VBZ NNS
storage-case NN
store NN VB VBP
store-sales NN
stored VBD VBN
stores NNS VBZ
stormed VBD
stormier JJR
stormy JJ
storytelling NN
stowed VBD
strafe VB
straight JJ RB
straighten VB
straighter RBR
straightforward JJ
strain NN VB VBP
strained VBN JJ
stranded VBN
strange JJ
strangeness NN
strangled VBN
strangles VBZ
strapped VBN JJ VBD
strategic-arms NN
stray VB JJ VBP
streaked VBD
stream-of-consciousness NN
streamed VBD
streamline VB
streamlined JJ VBD
streamlining VBG NN
strengthen VB VBP
strengthened VBD VBN JJ
strengthening VBG NN JJ
strengthens VBZ
streptokinase NNP
stress NN VBP VB
stressed VBD VBN
stresses VBZ NNS
stretch NN VB VBP JJ
stretched VBN VBD JJ
stretches VBZ NNS
strewn VBN
stricken VBN JJ
strict JJ
stricter JJR
strident JJ
strike NN VB VBP
strike-force NN
strikes NNS VBZ
striking JJ VBG
string NN VB
stringent JJ
strip NN VB
stripped VBN VBD JJ
strips NNS VBZ
strive VBP
striven VBN
strives VBZ
strode VBD
strokes NNS VBZ
stroll VB VBP
strong JJ RB
stronger JJR RBR
strongest JJS
strove VBD
struck VBD VBN
structural JJ
structure NN VB
structured VBN JJ VBD
structuring VBG NN
struggle NN VB
struggled VBD VBN
struggles VBZ NNS
struggling VBG JJ
stubborn JJ
stubby JJ
stuck VBN VBD JJ
studded VBN
student-athlete NN
student-athletes NNS
studentled VBN
studied VBN VBD
studies NNS VBZ
studiousness NN
study NN VB VBP
stuff NN VBP
stuffed VBN VBD
stuffy JJ
stumble VB VBP NN
stumbled VBD VBN
stumbling VBG JJ
stung VBN
stunned VBD VBN JJ
stunning JJ
stunted VBN
stupid JJ
stupidest JJS
sturdy JJ
styled VBN
styling NN VBG
stylish JJ
stymied VBN
sub-markets NNS
sub-segments NNS
sub-underwriters NNS
sub-underwriting VBG
subconscious NN
subcontract VB JJ
subcontracting NN
subdued VBN JJ
subject JJ NN VB
subjected VBN
subjects NNS VBZ
sublet VB
sublime JJ
subliminal JJ
submarine NN JJ
subminimum JJ NN
submit VB VBP
submits VBZ
submitted VBN VBD
subnational JJ
subordinate JJ NN VB
subordinated JJ VBN VBD
subordinates NNS VBZ
subpoena NN VB
subpoenaed VBN
subscribe VB VBP
subscribed VBN
subscribes VBZ
subsequent JJ
subsided VBN VBD
subsidiary NN JJ
subsidize VB
subsidized VBN JJ
subsidizes VBZ
substandard JJ
substantial JJ
substantiate VB
substitute NN VB JJ
substituted VBN VBD
subsumed VBN
subterranean JJ
subtitled VBN
subtle JJ
subtract VB
subtracted VBN VBD
suburban JJ
subvert VB
subverted VBN
subverts VBZ
succeed VB VBP
succeeded VBN VBD
succeeds VBZ
success NN
succumbed VBD VBN
such JJ PDT
sucks VBZ
sudden JJ
sue VB
sued VBD VBN
suffer VB VBP
suffered VBD VBN
suffering VBG NN
suffers VBZ
suffice VB
sufficed VBD
sufficient JJ
suggest VBP VB
suggested VBD VBN JJ
suggests VBZ
suicidal JJ
suit NN VB RB
suited VBN
suits NNS VBZ
suject JJ
sulfur-dioxide NN
sum NN VB
summarize VB
summarized VBD
summary NN
summed VBD
summer\/winter JJ
summon VB
summoned VBN VBD
summons NN
sums NNS VBZ
sundry JJ
sung VBN
sunglasses NNS NN
sunk VBN VBD
sunken JJ
sunny JJ
super JJ
super-charger NN
super-majority JJ NN
super-regulator NN
super-spy NN
super-user NN
superb JJ
supercede VBP
superceded VBD
superefficient JJ
superficial JJ
superimposed VBN
superior JJ
supersede VB
superseded VBN VBD
supervise VB VBP
supervised JJ VBD VBN
supervises VBZ
supervisory JJ
supplement NN VB
supplemental JJ
supplied VBN VBD
supplies NNS VBZ
supply NN VB VBP
supply-side JJ NN
supply-sider NN
support NN VB VBP
supported VBN VBD
supporting VBG JJ
supports VBZ NNS
suppose VBP VB
supposed VBN VBD JJ
suppress VB
suppressed VBN VBD
supraventricular JJ
supreme NN JJ
sure JJ RB
surest JJS
surface NN VB VBP
surfaced VBD VBN
surfaces VBZ
surge NN VB
surged VBD VBN
surges NNS VBZ
surging VBG JJ
surpass VB VBP
surpassed VBN VBD
surplus NN JJ
surprise NN VB JJ RB
surprised VBN JJ VBD
surprising JJ VBG
surreal JJ
surrender VB NN
surrendered VBD VBN
surrogate JJ NN
surround VBP
surrounded VBN VBN|JJ
surrounding VBG JJ
survey NN VB VBP
surveyed VBN VBD
surveys NNS VBZ
survive VB VBP
survived VBD VBN
survives VBZ
suspect VBP VB JJ NN
suspected VBN VBD JJ
suspects VBZ NNS
suspend VB
suspended VBN VBD JJ
sustain VB
sustained VBN VBD JJ
sustains VBZ
svelte JJ
swallow VB
swallowed VBN
swamp VB
swamped VBN VBD
swankier JJR
swap NN VB VBP
swapped VBN
swathed VBN
sway VB NN VBP
swayed VBN
swaying VBG NN
swear VB VBP
swearing NN
swearing-in NN
swears VBZ
sweat NN VBP VBD VB
sweated VBN
sweating NN
sweaty JJ
sweep NN VB
sweeping JJ VBG
sweeps NNS VBZ
sweepstakes NN NNS
sweet JJ
sweeten VB
sweetened VBN VBD JJ
sweetness NN
swell VB VBP NN
swelled VBD VBN
swells NNS VBZ
swept VBD VBN
swerve VBP
swift JJ NN
swim VBP
swimming NN VBG
swindled VBN
swine NNS
swing NN VBP VB
swings NNS VBZ
switch VB NN VBP
switched VBD VBN
switches NNS VBZ
switching VBG NN
swollen JJ
swore VBD
sworn VBN JJ
swung VBD VBN
syllable NN
symbolized VBN
symbolizes VBZ
sympathize VBP
synchronize VBP
synchronized VBN
syndciated VBN
syndicate NN VB
syndicated VBN JJ
synthesis NN
synthesize VB
synthetic JJ NN
system-management NN
systemwide JJ
t' PRP
table NN
tabloid JJ NN
taboo NN JJ VB
tacit JJ
tacked VBD
tackle VB VBP
tackled VBN
tackles VBZ
tacky JJ
tactic NN
tad NN RB
tag NN VB
tagged VBN
tail NN JJ
tailored VBN JJ
tainted VBN JJ
tainted-meat NN
take VB VBP NN
take-out NN
taken VBN
takeover-stock JJ NN
takeover-threat NN
takes VBZ
taketh VB
taking VBG NN
talk NN VB VBP
talk-show NN JJ
talked VBD VBN
talking VBG NN
talks NNS VBZ
tall JJ
taller JJR
tallest JJS
tallied VBD
tally NN
tame JJ
tamer JJR
tamper VB
tandem JJ NN
tandem-trainer NN
tangential JJ
tangle NN VBP
tangled VBN JJ
tangoed VBD
tank NN VB
tanked VBN
tanned VBN
tantamount JJ
tap VB
tap-tap NN
tape NN VB VBP
tape-delay NN
taped VBN VBD
taper VB
tapers NNS VBZ
taping NN VBG
tapped VBN VBD
tardy JJ
target NN VB VBP
targeted VBN JJ VBD
targeting VBG VBG|NN
targets NNS VBZ
tarnish VB
tarnished VBN VBD JJ
tarred VBD
tart JJ
task-force NN
taste NN VBP VB
tastes NNS VBZ
tastier JJR
tasting NN
tasty JJ
taught VBD VBN
taunted VBD
taunting NN
taut JJ
tawdry JJ
tax NN VB
tax-compliance NN
tax-deductions NNS
tax-evasion NN
tax-exempts NNS
tax-fraud NN
tax-loss JJ NN
tax-preparation NN
tax-rate JJ NN
tax-reducing VBG
tax-writers NNS
taxed VBN VBD
taxes NNS VBZ
taxfree JJ
teach VB VBP
teaches VBZ
teaching NN VBG
team NN VB
team-management NN
teamed VBD
tear VB
teased VBN
technical-services NNS
teemed VBD
teen JJ NN
teen-ager NN
teen-agers NNS
teenage JJ
teeth NNS
telecommunications NNS NN NNS|NN JJ
telegraph VBP NN
telegraphed VBD
telemarketing NN
telephone NN VB
telephone-company NN
telephone-information NN
telephoned VBD
televised VBN JJ
televising NN
television-viewing NN
tell VB VBP
tell-tale NN
telling VBG JJ
tells VBZ
telltale JJ
tempered VBN
temporal JJ
tempt VB VBP
tempted VBD VBN
tempting JJ
tempts VBZ
ten CD
tend VBP VB
tended VBD VBN
tender NN VB JJ VBP
tendered VBN JJ VBD
tenderness NN
tends VBZ
tenfold RB
tennis NN
tense JJ
tentative JJ NN
tenth NN JJ
tepid JJ
term NN VB
termed VBD VBN
terminal NN JJ
terminate VB
terminated VBD VBN
terrestrial JJ
terrified VBN
terrify VB
terrifying JJ
terrorist JJ NN
terse JJ
test NN VB VBP
test-drive VBP VB
test-fired VBN
test-marketing NN JJ
test-tube NN
tested VBN VBD
testified VBD
testifies VBZ
testify VB VBP
testimonial JJ NN
testing NN VBG VBG|NN
tests NNS VBZ
tetanus NN
tete-a-tete NN
tethered JJ VBN
textile NN JJ
than IN IN|RB RB RBR
thank VB VBP
thanked VBD
that IN WDT DT RB VBP NN
the DT JJ NNP CD VBP NN
theatre FW
theatrical JJ NN
their PRP$
theirs PRP JJ
them PRP DT
theme-park NN
themed VBN
themselves PRP
then RB IN JJ
then-Air JJ|NNP
then-Vice NNP JJ
then-chairman NN
then-client NN
then-husband NN
then-minister NN
theorized VBD
theory-teaching VBG
there EX RB
thereabouts RB
thereafter RB
thereby RB
therefore RB
therein RB
thereof RB
thermal JJ
thesaurus NN
these DT
thesis NN
thespian JJ
they PRP
thick JJ
thicker JJR
thickness NN
thin JJ RB
thing NN
think VBP VB NN
think-tank NN
thinking VBG NN
thinks VBZ
thinned VBN
thinner JJR
thinnest JJS
third JJ NN RB
third-highest JJS
third-quarter JJ NN
thirsty JJ
thirty CD
thirtysomething NN NNP JJ
this DT RB NN
thorough JJ
thoroughbred JJ NN
those DT
though IN RB
thought VBD VBN NN
thousand CD
thrash VB
thrashed VBD
thrashing NN VBG
threaten VB VBP
threatened VBN VBD JJ
threatening VBG JJ
threatens VBZ
three CD
three-fourths JJ NNS
three-hour-show NN
three-quarters NNS
three-sevenths NNS
three-step NN
threefold RB
threemonth JJ
threw VBD
thrift-accounting NN
thrift-bailout JJ NN
thrift-industry NN
thrift-institution NN
thrift-overhaul NN
thrill NN VB
thrilled VBN
thrills VBZ
thrips NN
thrive VBP VB
thrived VBD
thrives VBZ
thriving VBG JJ
through IN RP RB JJ
throughout IN
throw VB VBP
throwaway JJ
throwing VBG NN
thrown VBN
throws VBZ
thrust NN VBD VBN
thumb NN VB
thumbs NNS VBZ
thumbs-down NN
thump-thump NN
thundered VBD
thus RB
thwart VB
thwarted VBN VBD
tick VB NN
ticked VBN
ticketed VBN
ticklish JJ
ticks VBZ
tidal JJ
tidy JJ
tie VB NN
tie-in NN JJ
tie-ins NNS NN
tie-up NN
tie-ups NNS
tied VBN VBD
ties NNS VBZ
tight JJ RB
tighten VB VBP
tightened VBD VBN
tightening VBG NN
tighter JJR RBR
tightness NN
till IN
tilt VB NN
tilted JJ VBN
tilts VBZ
time NN VB
time-hotels NNS
time-shares NNS
time-table NN
timed VBN VBD
timely JJ
times NNS CC
timetable NN
timid JJ
timing NN VBG
timpani NNS
tinged VBN
tiniest JJS
tinker VB
tinkered VBN
tinkering NN VBG
tiny JJ
tip NN VB
tip-off NN
tipped VBD
tippling JJ
tiptoe VB
tiptoed VBD VBN
tire-kickers NNS
tired JJ VBN
tires NNS VBZ
tiresome JJ
title-insurance JJ NN
titled VBN VBD
to TO IN JJ
toasted VBD
tobacco-industry NN
today NN RB
together RB
toil VBP VB
toiled VBD
toiling NN VBG
token JJ
told VBD VBN
tolerate VB
tonal JJ
toned VBN
tongue-in-cheek JJ RB
tongue-lashing NN
tonic NN
tonight NN RB
tony JJ
too RB
took VBD
tooling NN
tooted VBD
top JJ NN VB VBP
top-drawer NN
top-management JJ NN
topgrade JJ
topic NN
topped VBD VBN
topple VB
toppled VBD VBN
tops NNS VBZ
topsy-turvy RB
torched VBD VBN
tore VBD
torment VB
torments VBZ
torn VBN JJ
torpedo VB
torpedoed VBN
torrid JJ
torture VBP VB
tortured JJ VBN
toss VB
tossed VBD VBN
total JJ NN VB VBP
totaled VBD VBN
totals NNS VBZ
tote VB
toted VBN
totter VB
touch NN VB VBP RB
touched VBD VBN
touching VBG JJ NN
touchy JJ
tough JJ VB
toughen VB
toughened VBD
tougher JJR RBR
toughest JJS
toughness NN
tour NN VB
toured VBD
touring VBG NN
tours NNS VBZ
tout VB
touted VBD VBN
touts VBZ
tow NN RB
toward IN
towards IN
tower NN VB
towering JJ
town-house NN
toxic JJ NN
toxic-waste NN
toy NN JJ
toy-store NN
trace VB
traced VBD VBN
traces NNS VBZ
track NN VB VBP
tracked VBN VBD JJ
tracking VBG NN
tracks VBZ NNS
tractor-trailer NN
trade NN VB VBP
trade-ad NN
trade-group NN
trade-in NN
trade-off NN
trade-offs NNS NN
traded VBN VBD JJ VBN|VBD
tradedistorting JJ
trades NNS VBZ
trading NN VBG JJ VBG|NN
trading-company NN
trading-room NN
traditional JJ
traduce VB
traduced VBN
traffic NN
trafficking NN
trail NN VB VBP
trailed VBD VBN
trails NNS VBZ
train NN VB VBP
trained VBN JJ
training NN VBG
trains NNS VBZ
traipse VB
trampled VBN JJ
tranquilizing JJ
transact VB
transacted VBN
transatlantic NN
transbay JJ
transcribe VBP
transfer VB NN
transferred VBN VBD
transfers NNS VBZ
transform VB
transformed VBN VBD
transforms VBZ
transient JJ
transit-association NN
transitional JJ
transitory JJ
translate VB VBP
translated VBN
translucent JJ
transluscent JJ
transmission-product NN
transmit VB
transmitted VBD VBN JJ
transmogrified VBN VBD
transnational JJ
transparent JJ
transplant NN VB
transplanted VBN JJ
transport NN VB
transported VBN VBD
transporting VBG NN
transports VBZ NNS
trapped VBN JJ
trash NN VB
trash-bag NN
trashing NN VBG
traumatized VBN VBD
travel NN VB VBP
travel-agency NN
traveled VBD VBN
travels VBZ NNS
tread VB
treads VBZ
treasure-trove NN
treasury-management NN
treat VB VBP NN
treated VBN VBD
treats VBZ NNS
trebled VBD
trekked VBD
trend NN VB
trend-setters NNS
trendiest JJS
trendy JJ
trespass NN VBP
trespassing NN
tri-jet NN
trick NN VB
trickier JJR
trickle VB NN VBP
tricky JJ
tried VBD VBN JJ
tries VBZ NNS
trifle RB
trigger VB NN VBP
triggered VBN VBD JJ
triggers VBZ
trillion CD
trillion-plus NN
trim VB JJ
trimmed VBD VBN RBR
trimmer JJR
trimming VBG NN
triple JJ RB VB
triple-A JJ NNP
triple-B-minus NNP
triple-C NN
tripled VBN VBD
tripped VBN
tristate JJ
triumphed VBD
trivia NNS
trivial JJ
trivialize VB
trodden JJ
trop FW
tropical-fruit NN
trotted VBN VBD
trouble NN JJ
troubled JJ VBN VBD
troubles NNS VBZ
troublesome JJ
troubling JJ VBG
troughed VBD
trout NNS
truant JJ
truck NN VBP
truck-parts NNS
truck-refrigeration NN
trucking NN
trucks NNS VBZ
true JJ
trumpet NN VBP
trumpets VBZ
trundles VBZ
trust NN VB VBP
trusted VBD VBN
trusts NNS VBZ
truth-in-lending NN
try VB VBP NN
tubular JJ
tuck VB
tucked VBN VBD
tug-of-war NN
tugged VBD
tumble NN VB
tumbled VBD VBN
tumbledown JJ
tumbles VBZ NNS
tumor-suppressors NNS
tune NN VBP VB
tuned VBN
turbulent JJ
turf NN JJ
turgid JJ
turn VB NN VBP RB
turn-ons NNS
turned VBD VBN
turning VBG NN
turns VBZ NNS
tutored VBN
twangy JJ
tweaking NN
tweed NN
twelve CD
twelvefold JJ
twenty CD
twice RB JJ
twin JJ NN
twin-deficit NN
twin-jet NN
twinned VBN
twist NN VBP
twisted JJ VBN
twisting VBG NN
twists NNS VBZ
twitch VB
two CD
two-hundredths NNS
two-income NN JJ
two-sevenths NNS
two-thirds NNS JJ
typed VBN
typified VBD
typifies VBZ
ugly JJ
uh UH
ultimate JJ
ultramodern JJ
ultraviolet NN JJ
un-advertisers NNS
un-advertising NN
unappealing JJ
unassuming JJ
unaware JJ
unawareness NN
unawares RB
unbanning VBG NN
unbeknownst JJ
unblinking JJ
unblock VB
unborn JJ NN
unbroken JJ
uncanny JJ
uncertain JJ
unchanging JJ
unchlorinated VBN
unclean JJ
unclear JJ
uncommon JJ
uncomplaining JJ
unconditional JJ
unconsolidated JJ VBN VBD
unconstitutional JJ
unconventional JJ
unconvincing JJ
uncover VB
uncovered VBN VBD JJ
under IN JJ RB
under-inclusion NN
under-secretary NN
undercover JJ
undercut JJ VB VBD VBP VBN
underestimated VBN VBD
underfunded VBN
undergirded VBD
undergirding NN
undergo VBP VB
undergone VBN
undergraduate NN JJ
underground JJ RB NN
underlie VB
underline VB
underlined VBD
underlying VBG JJ
undermine VB VBP
undermined VBN VBD
underneath IN
underpaid JJ
underperform VB
underperformed VBN
underperforms VBZ
underpin VB
underpinned VBN
underpriced VBN
underscore VBP NN VB
underscored VBD VBN
underscores VBZ
undersecretary NN
understaffs VBZ
understand VB VBP
understand\/adopt VB
understanding NN VBG
understands VBZ
understate VBP
understated VBN VBD
understood VBN VBD
undertake VB
undertaken VBN
undertaking VBG NN
undertook VBD
underutilized VBN
undervalued VBN JJ VBD
underwater JJ
underweighted VBN
underwent VBD
underwhelmed VBN
underwrite VB VBP
underwriters NNS ,
underwrites VBZ
underwriting NN VBG
underwritten VBN JJ NN
underwrote VBD
undid VBD
undo VB
undoing NN
undone VBN
undress NN
undue JJ
undulate VB VBP
unearthed VBD
uneasiness NN
uneasy JJ
unending JJ
unenticing JJ
unequal JJ
uneven JJ
unexecuted VBN
unfair JJ
unfamiliar JJ
unfazed JJ VBN
unfit JJ NN
unflaky JJ
unflattering JJ
unfocussed VBN
unfold VB
unfolded VBD
unfolds VBZ
unforeseen JJ
unforgiving JJ
unfortunate JJ
unfriendly JJ
ungainly JJ
ungentlemanly JJ
unhappiness NN
unhappy JJ
unhealthy JJ
unheard JJ
unhinged VBN
unhocked VBN
unhurt JJ
unhusked VBN
unified JJ VBN
uniform NN JJ
unify VB
unifying JJ VBG
unilateral JJ
unimportant JJ
union-bidder NN
unionized VBD
unique JJ
unit-price NN
unite VB
united VBN
unites VBZ
universal JJ
unjust JJ
unknown JJ NN
unleash VBP VB
unleashed VBD VBN
unleashes VBZ
unless IN
unlike IN JJ
unlikely JJ RB
unload VB VBP
unloaded JJ VBN
unlock VBP
unlocked VBD
unlocks VBZ
unlovely JJ
unlucky JJ
unmask VB
unmasks VBZ
unmaterialized VBN
unmet JJ
unnerved VBD JJ
unnerving VBG JJ
unofficial JJ
unorthodox JJ
unpaid JJ
unpleasant JJ
unpleasantness NN
unplug VB
unpopular JJ
unprofessional JJ
unproven JJ
unravel VB
unraveled VBN VBD JJ
unraveling NN VBG
unread JJ
unroll VBP
unrolls VBZ
unruly JJ
unsafe JJ
unsavory JJ
unseated VBD JJ
unseemly JJ
unseen JJ
unsentimental JJ
unsettled JJ VBN VBD
unsettling JJ
unsold JJ
unsound JJ
unspent JJ
unsteadiness NN
unsteady JJ
unstinting JJ
unstylish JJ
unsure JJ
unsurprising JJ
unsuspecting JJ
unswaggering JJ
unthreatening JJ
until IN
unto RP IN
untold JJ
untrue JJ
untrustworthy JJ
unusual JJ
unveil VB
unveiled VBD VBN
unveiling VBG NN
unveils VBZ
unwelcome JJ
unwholesome JJ
unwieldy JJ
unwilling JJ
unwillingness NN
unwind VB
unwise JJ
unwitting JJ
unworthy NN JJ
unwritten JJ
up RB RP IN JJ IN|RB NNP
upbeat JJ NN
upcoming JJ
update VB NN
updated VBN
upgrade VB NN JJ
upgraded VBN VBD
upgrading VBG NN
upheld VBD VBN
uphill JJ RB
uphold VB
upholds VBZ
upon IN RP RB
upped VBD
upper JJ
upper-income JJ NN
uprising NN
uprooted VBD
ups-and-downs NNS
upscale JJ NN
upset VBN JJ VB NN VBD
upside RB NN JJ
upstairs NN RB JJ
upstart JJ NN
upstate JJ
upstream RB JJ
upswing NN
uptempo JJ
uptick NN VB
uptight JJ
upward RB JJ
uranium-mining NN
urban JJ
urban-development NN
urge VB NN VBP
urged VBD VBN
urgent JJ
urges VBZ
urinary-tract NN
us PRP
use NN VB VBP
used VBN VBD JJ
usefulness NN
uses VBZ NNS
ushered VBD VBN
ushers NNS VBZ
usual JJ RB
usurp VB
ususal JJ
uterus NN
utilitarian JJ
utilize VB
utmost JJ NN
utopian JJ
utter JJ
uttered VBD
v. CC IN
vacant JJ
vacate VB
vacated VBN VBD
vacillate VB
vacuum NN VB
vaginal JJ
vagrant JJ
vague JJ
vaguest JJS
vain JJ
valiant JJ
valid JJ
value NN VBP VB
value-assessment NN
valued VBN VBD
values NNS VBZ
van NNP NN
vandalized VBD
vanish VBP VB
vanished VBN VBD
vanishes VBZ
variable JJ NN
varied VBD VBN JJ
varies VBZ
vary VBP VB
vast JJ
vault NN VB
veer VB
vegetable NN
vehement JJ
vehicle-suspension NN
veiled VBN
venal JJ
vent VB
vented VBD
ventilated VBD VBN
venture NN VB JJ
venture-capital JJ NN
venturesome JJ
verbal JJ
verbatim JJ RB
verged VBD
verified VBN
verify VB
versa RB FW
versus CC IN FW
very RB JJ
vested JJ VBN
veteran NN JJ
veto NN VB
vetoed VBD VBN
vexed JJ VBN
vexing JJ
via IN
vibrant JJ
vice NN RB FW
vice-president NN
victimized VBN
video NN JJ
videoconferencing NN
videotape NN VB
view NN VBP VB
viewed VBN VBD
viewing VBG NN
views NNS VBZ
vindicated VBN
vintage NN JJ
vinyl-products NNS
violate VB VBP
violated VBD VBN
violates VBZ
violent JJ
viral JJ
virgin JJ
virtual JJ
virtually RB JJ
virtuoso JJ NN
virus NN
vis FW
visit NN VB VBP
visited VBD VBN
visits NNS VBZ
visual JJ
visualize VB
vital JJ
vitiate VB
vitreous-china NN
viva FW
vivid JJ
vocal JJ NN
vocal\/piano JJ
voice NN VBP VB
voiced VBN VBD
voices NNS VBZ
void NN VB JJ
voided VBN
voir FW
volatile JJ
volunteer NN VB
volunteered VBD VBN
volunteering NN
vomiting NN VBG
von NNP
vote NN VB VBP
vote-getters NNS
voted VBD VBN
votes NNS VBZ
voting NN VBG JJ
vowed VBD VBN
vows VBZ
vs. IN FW CC NN JJ
wacky JJ
wad NN VB
wad-working NN
waddles VBZ
wade VB
waffled VBN VBD
wage NN VB
wage-discrimination NN
waged VBD
wagering NN
wail VB
wait VB NN VBP
waited VBD VBN
waiting VBG NN
waitress NN
waits VBZ
waive VB
waived VBN VBD
waivered VBN
waives VBZ
wake NN VBP
walk VB VBP NN
walked VBD
walkie-talkie NN
walkie-talkies NNS
walking VBG NN VBG|NN
walks VBZ NNS
wall NN VB
walloping NN
wallops VBZ
wander VB VBP
wanders VBZ
wane VBP VB
waned VBD VBN
wanes VBZ
want VBP VB NN
wanted VBD VBN JJ
wants VBZ
war NN VB
ward VB NN
warded VBN
warehouse-club NN
warehouse-type NN
warehousing NN
warm JJ VB
warm-up NN
warmed VBN VBD
warmer JJR
warmheartedness NN
warming NN VBG VBG|NN
warn VBP VB
warned VBD VBN
warning NN VBG
warns VBZ
warrant NN VB VBP
warranted VBN
warrants NNS VBZ
was VBD
wash VB NN VBP
washed VBN VBD
washing VBG NN
waste NN VB
waste-treatment NN
waste-water NN
wasted VBN VBD
wastes NNS VBZ
wasting NN VBG
watch VB NN VBP
watched VBN VBD JJ
watches NNS VBZ
watching VBG NN
water NN VB
water-authority NN
water-pollution NN
water-purification NN
water-treatment JJ NN
watered VBD
watering NN VBG
watershed JJ NN
waterworks NN NN|NNS
watery JJ
waved VBD
wavered VBD
wavering VBG NN
waxed VBN VBD
way NN RB
wayward JJ
we PRP VBP
weak JJ
weaken VB VBP
weakened VBN VBD JJ
weakening VBG NN
weakens VBZ
weaker JJR
weakest JJS
weakling NN
weakness NN
wealthier JJR
wealthiest JJS
wealthy JJ
wean VB
weaponsmaking NN
wear VB VBP NN
weariness NN
wears VBZ
weather NN VB VBP
weatherbeaten JJ
weaves VBZ
wed VBN
wedded VBN
wedding NN
wedge NN VB
wedged VBN VBD
weds VBZ
weed NN
weeked NN
weeklong JJ NN
weekly JJ RB NN RB|JJ
weigh VB VBP
weighed VBD VBN
weighs VBZ
weight NN VB
weight-training NN
weighted JJ VBN
weighting NN
weighty JJ
weird JJ
welcome JJ VB VBP NN
welcomed VBD VBN
welcomes VBZ
welded VBN
welding NN
well RB NN UH JJ
well-being NN
well-known JJ NN
well-stated JJ VBN
well-wishers NNS
wellrun JJ
went VBD
wept VBD
were VBD VB
west NN RB JJ
western JJ
westward RB
wet JJ
whack VB NN
whacked VBD VBN
whacky JJ
what WP WDT
whatever WDT
whatsoever RB
wheat NN JJ
wheeled VBN
wheeling NN
wheellike JJ
when WRB
when-issued JJ VBN
whenever WRB
where WRB
whereabouts NN
whereas IN
whereby WRB
wherein WRB
wherever WRB
wherewithal JJ
whether IN CC
which WDT IN
whichever WDT
while IN NN VB
whip NN VB
whipped VBN
whipping VBG JJ
whips VBZ
whipsaw VB NN
whipsawed VBN
whipsawing NN
whirling JJ
whirlwind JJ NN
whisked VBN
whiskery JJ
whispered VBN
whispering VBG NN
whistle VBP
whistled VBN
white JJ NN
white-spirit NN
whitewashed VBN
whitish JJ
whittled VBN
who WP
whoever WP
whole JJ NN RP
wholesale JJ NN
wholesome JJ
whom WP
whooosh JJ
whooping JJ VBG
whoosh VBP
whopping JJ
whoring NN
whose WP$
why WRB
wide JJ RB
widen VB VBP
widened VBD VBN
widening NN VBG
widens VBZ
wider JJR RBR
widespread JJ
widest JJS
widowed VBN JJ
wield VB
wielded VBN
wields VBZ
wiggle NN VBP
wiggled VBD
wild JJ RB
wildcat NN JJ
wilderness NN
will MD NN VB
willing JJ VBG
willingess NN
willingness NN
willy-nilly RB
wily JJ
wimp VB NN
win VB VBP NN
wind NN VB VBP
window-shopping NN
wine-making NN
wines NNS NN
wing NN
winning VBG JJ NN
winningest JJS
winnowing NN
wins VBZ NNS
wipe VB VBP
wiped VBN VBD
wire NN VB
wired VBN
wireline JJ
wiring NN
wiry JJ
wise JJ
wiser JJR
wish VBP NN VB
wish-list NN
wish-lists NNS
wished VBD VBN
wishes VBZ NNS
witching NN
with IN RP
withdraw VB
withdrawn VBN
withdrew VBD
wither VBP
withheld VBN VBD
withhold VB VBP
withholding NN VBG
within IN
withing IN
without IN
withstand VB
withstood VBD VBN
witness NN
witnessed VBN
witty JJ
wo MD
wobbly JJ
woebegone JJ
woke VBD
woken VBN
women NNS
won VBD VBN NN NNS
wonder VBP NN VB
wondered VBD
wonders VBZ NNS
woo VB
wood-and-brass NN
wood-chip NN
wood-product NN
wood-products NNS
wooden JJ
wooed VBN
wooing VBG NN
woolly JJ
word-processing NN NNS
worded VBN
wording NN
wore VBD
work NN VB VBP
work-force NN
work-in-progress NN
work-rule NN JJ
work-station NN
work-study NN
workaholic NN JJ
worked VBD VBN
worker-compensation NN
worker-safety NN
working VBG NN JJ VBG|NN
working-girl NN
workmen NNS
workplace NN JJ
works VBZ NNS
world-affairs NNS
world-wide JJ RB
worn JJ VBN
worried VBN JJ VBD
worries NNS VBZ
worrisome JJ
worry VBP VB NN
worrying VBG JJ
worse JJR RBR
worsen VB
worsened VBN VBD
worsening VBG NN
worst JJS
worth JJ NN IN
worthier JJR
worthiness NN
worthwhile JJ
worthy JJ
would MD
wound VBD NN VB VBN
wounded VBN JJ
woven VBN
wow UH
wows VBZ
wrack VBP
wracked VBN VBD
wrangling VBG NN
wrap NN VB
wrapped VBD VBN
wrapping VBG NN
wraps VBZ
wreak VB
wreaked VBD
wreck NN VB
wrecked VBD
wrenched VBN
wrenching JJ VBG
wrest VB
wrested VBN
wrestle VB
wrestles VBZ
wrestling VBG NN
wring VB
write VB VBP
write-down NN
write-downs NNS NN
write-off NN
write-offs NNS NN
writes VBZ
writing VBG NN
written VBN JJ
wrondgoing NN
wrong JJ RB NN
wrongdoing NN
wronged VBN
wrote VBD
wrought VBD
wrung VB
x SYM LS
y'all PRP
ya PRP
yachting NN
yank VB
yanked VBD VBN
year-earlier JJ NN
year-end NN JJ RB
yearearlier JJ
yearling JJ
yearlong JJ
yearly JJ RB
yearning NN
yell VB
yelled VBD
yellow JJ NN
yells VBZ
yelped VBD
yen NNS NN
yes UH RB
yesterday NN RB
yet RB CC
yield VB NN VBP
yield-management NN
yielded VBD VBN
yielding VBG JJ NN
yields NNS VBZ
yon RB
you PRP
you-know-what NN
young JJ
younger JJR
youngest JJS
youngish JJ
your PRP$
yourself PRP
z SYM
zero CD NN VBP VB
zero-coupon JJ NN
zero-inflation NN
zig-zag VBP
zilch NN|JJ
zillion NN|CD
zip NN VB VBP
zoning NN VBG
zoom VB
zoomed VBN VBD
zounds UH
{ (
} )
