# Supplementary material for: ScholarLens: extracting competences from research publications for the automatic generation of semantic user profiles
Source: PeerJ journal article supplement (doi:10.7717/peerj-cs.121), 2017-07-03
Supplement: Pipeline.zip [file Pipeline.zip › Pipeline/gate/plugins/ANNIE/resources/heptag/rules_cap]

CD PRP NEXTTAG MD
CD LS NEXTTAG )
CD NNS PREV1OR2OR3TAG JJ
CD LS PREVBIGRAM STAART STAART
CD NN PREVWD NO
NNS NNP LBIGRAM GENERAL MILLS
NNS NNP RBIGRAM CITIZENS FOR
NNS NNP WDNEXTTAG FUTURES NNP
NNS VBZ WDPREVTAG , CLAIMS
NNS VBZ WDPREVTAG NNP REPORTS
NNS NNP WDNEXTTAG FARMERS NN
NNS NNPS LBIGRAM WINTER GAMES
NNS NNP WDPREVTAG NNP GIANTS
NNS NNP SURROUNDTAG NNS NNP
NNS NNPS NEXT1OR2WD INC
NNS NNP NEXTWD LIMITED
NNS NNS CURWD PEOPLE
NNS NNPS NEXTWD FIRST
NNS NNP PREVWD STAR
NNS NNP PREVWD EASY
NNS NNS PREVWD DOWN
NNS NNS CURWD BONDS
NNS NNP PREVWD HERITAGE
NNS NNS CURWD BROKERS
NNS NNPS PREVWD TW
NNS VBZ SURROUNDTAG NNP NNS
NNS NNP LBIGRAM FIDELITY INVESTMENTS
NNS CD WDAND2BFR IN 1970S
NNS VBZ LBIGRAM COMPANY PLANS
NNS NNP NEXT1OR2WD AGENCY
NNS NNPS WDPREVTAG NNP MINERALS
NNS NNP WDAND2TAGAFT WAYS VBZ
NNS NN WDAND2TAGBFR DT DATA
NNS NNS WDAND2TAGAFT PRODUCERS NNP
NNS VBZ PREV1OR2WD THIS
NNS NNPS WDAND2BFR AT SECURITIES
NNS NNP WDPREVTAG DT GIANTS
NNS NNPS WDAND2BFR , FACILITIES
NNS NNPS PREV1OR2WD DEB
NNS VBZ PREVWD GROUP
NNS NNS PREVWD BACK
NNS NNS PREVWD ENOUGH
NNS NNP WDAND2TAGBFR IN PICTURES
NNS CD NEXT1OR2OR3TAG IN
NNS NNPS WDAND2BFR HOUSE REPRESENTATIVES
NNS NNP RBIGRAM SECURITIES CORP.
NNS NNP WDAND2AFT TIMES INDEX
NNS NNPS LBIGRAM OF FARMERS
NNS NNP NEXT1OR2WD ASSOCIATION
NNS NNPS WDPREVTAG NNP RESOURCES
NNS NNPS PREV1OR2WD CAPCOM
NNS NNS CURWD EMPLOYEES
NNS NNPS PREVWD CBS
NNS VBZ PREVBIGRAM VBZ CC
NNS NNP SURROUNDTAG JJ NNP
NNS VBZ RBIGRAM ESTIMATES THAT
NNS VBZ WDPREVTAG NNP CLAIMS
NNS NNPS LBIGRAM HUMAN SERVICES
NNS NNPS WDPREVTAG NNP BOYS
NNS NNPS WDPREVTAG NNP ENTERPRISES
NNS NNP WDNEXTTAG DATA NNS
NNS VBZ NEXTBIGRAM JJ NNS
NNS NNP PREVWD MR.
NNS VBZ NEXTTAG PRP$
NNS NNPS WDAND2TAGBFR NNP SERVICES
NNS NNPS LBIGRAM ZERO-COUPON CDS
NNS VBZ SURROUNDTAG , TO
NNS NNPS LBIGRAM AIR LINES
NNS NNPS WDPREVTAG VBG MATERIALS
NNS NNP LBIGRAM AMERICAN STORES
NNS NNS PREVTAG CD
NNS VBZ NEXTWD A
NNS NNPS SURROUNDTAG NNP VBZ
NNS VBZ SURROUNDTAG NN NNS
NNS NNP LBIGRAM THE TIMES
NNS NNP WDPREVTAG NNP GRAPHICS
NNS NNS PREV1OR2WD UP
NNS NNP LBIGRAM FEDERAL SAVINGS
NNS VBZ WDPREVTAG NNP PLANS
NNS NNPS WDPREVTAG NNP PARTNERS
NNS NNP NEXTWD COMMITTEE
NNS VBZ PREVWD WHO
NNS NNP LBIGRAM CONTROL DATA
NNS NNS NEXT1OR2WD UNION
NNS NNP WDPREVTAG NNP SAVINGS
NNS NNP WDPREVTAG NNP TIMES
NNS NNP WDAND2TAGBFR NNP MARKETS
NNS VBZ PREVBIGRAM NNP ,
NNS VBZ PREVTAG RB
NNS NN WDPREVTAG DT YEN
NNS NNPS PREV1OR2WD UNITED
NNS VBZ PREV2WD MR.
NNS NNPS NEXTBIGRAM NN NNP
NNS NNPS WDAND2AFT SECURITIES EXCHANGE
NNS VBZ NEXTWD THE
NNS VBZ PREVBIGRAM , WDT
NNS VBZ PREVTAG PRP
NNS NNPS NEXTTAG NNP
NN NN LBIGRAM FEDERAL COURT
NN NNP LBIGRAM FINANCIAL INDEX
NN NN RBIGRAM TAX CODE
NN NN WDAND2BFR IN STATE
NN NNP LBIGRAM THE SERIES
NN NN RBIGRAM RESEARCH DEPARTMENT
NN NNP LBIGRAM ENERGY TRANSPORTATION
NN NN LBIGRAM UAL STOCK
NN NNP RBIGRAM CENTER FOR
NN NNP LBIGRAM ASSET MANAGEMENT
NN NNP RBIGRAM TIME WARNER
NN NNP RBIGRAM MARKET FUND
NN NNP RBIGRAM FUND REPORT
NN NNP LBIGRAM GIANT GROUP
NN JJ RBIGRAM CALL OPTIONS
NN NNP RBIGRAM POP RADIO
NN NNP LBIGRAM CAPITAL MANAGEMENT
NN NN RBIGRAM MANAGEMENT COMMITTEE
NN NNP LBIGRAM POP RADIO
NN NNP LBIGRAM MARKET FUND
NN NNP LBIGRAM BIG BOARD
NN NNP LBIGRAM MITSUBISHI ESTATE
NN NNP WDAND2BFR MONEY REPORT
NN NNP WDAND2BFR FEDERAL BANK
NN NNP WDAND2AFT MONEY REPORT
NN NNP WDAND2BFR LABOR EDUCATION
NN VBG WDNEXTTAG VOTING IN
NN NN WDPREVTAG DT TRADE
NN NN WDPREVTAG NNS CONTROL
NN NN WDNEXTTAG STOCK IN
NN NN WDAND2TAGBFR NNS TRADING
NN NNP WDAND2TAGAFT ORGANIZATION NNP
NN JJ WDNEXTTAG FOREIGN-EXCHANGE NN
NN NNP WDAND2TAGBFR NNS PARTNERSHIP
NN JJ WDNEXTTAG RIGHT NNS
NN NNP WDPREVTAG , TIME
NN NNP WDAND2TAGBFR POS DOLLAR
NN JJ WDNEXTTAG ALTERNATIVE NN
NN NNP WDAND2TAGBFR NNP AIRPORT
NN JJ WDAND2TAGAFT FRONT IN
NN NN WDNEXTTAG CITY IN
NN NN PREVWD CREDITORS
NN NNP WDPREVTAG NNS COMMITTEE
NN JJ WDNEXTTAG RIGHT .
NN JJ WDAND2TAGAFT STOCK-MARKET IN
NN NN WDNEXTTAG AD NN
NN NNP WDAND2TAGAFT POST VBD
NN NNP WDAND2TAGBFR `` NIGHT
NN NNP WDPREVTAG NNP CLUB
NN NN WDNEXTTAG BLOC NNS
NN VBD WDPREVTAG NN SPREAD
NN NNP WDPREVTAG NNP COLLEGE
NN NNP WDPREVTAG NN SOCIETY
NN NNP WDPREVTAG NNS AGENCY
NN NN WDAND2TAGAFT OFFICIAL NNP
NN NN WDAND2TAGAFT GROUP VB
NN NNP PREV1OR2WD COUNTER
NN VB PREV1OR2WD DID
NN NNP NEXT1OR2WD HOSPITAL
NN VBN PREV1OR2WD BE
NN JJ NEXTWD PRODUCERS
NN NNP CURWD ARTIST
NN NN CURWD PUBLISHER
NN NNP NEXTWD CORP.
NN NNP NEXTWD SOCIETY
NN NN CURWD DEVELOPER
NN NNP NEXTWD GENETIC
NN NN CURWD LAWYER
NN JJ CURWD PAGE-ONE
NN NNP PREVWD BROOKINGS
NN NN PREVWD OCTOBER
NN NNP NEXTWD WEEK
NN NNP NEXT2WD DIGEST
NN NN PREVWD 1988
NN NN PREVBIGRAM VBP DT
NN NNP NEXT2WD AGENCY
NN NN NEXT2WD OCT.
NN NN PREVWD THIS
NN VB SURROUNDTAG TO NNP
NN NN CURWD INTEREST
NN NN PREVWD U.K.
NN NN CURWD ATTORNEY
NN VBG PREVWD RESUME
NN VBG PREVWD BEFORE
NN NNP PREV2WD MINISTRY
NN NNP PREVWD DEUTSCHE
NN NN PREV2WD LOS
NN NNP NEXTBIGRAM POS DT
NN VBG PREVBIGRAM IN RB
NN VBP PREVBIGRAM PRP RB
NN VB SURROUNDTAG CC PRP
NN VB SURROUNDTAG CC PRP$
NN VBG SURROUNDTAG , JJ
NN VBP PREVBIGRAM NNS RB
NN VB SURROUNDTAG CC JJ
NN NNP SURROUNDTAG NNP (
NN NNP NEXTBIGRAM NNPS NNP
NN NN SURROUNDTAG DT VBN
NN VBN PREVTAG VBP
NN NNP LBIGRAM BANK BUILDING
NN NNP LBIGRAM CHEMICAL WASTE
NN NNP WDAND2AFT OFFICE MANAGEMENT
NN NN WDAND2BFR OF MORTGAGE
NN NNP LBIGRAM OF INVESTIGATION
NN NNP RBIGRAM BANK BUILDING
NN NNP WDAND2AFT MARKET INDEX
NN NNS WDNEXTTAG POLICE IN
NN NN WDPREVTAG NNP LEADER
NN NNP WDNEXTTAG VALUE NN
NN JJ WDNEXTTAG ALTERNATIVE NNS
NN NN WDPREVTAG NNP NIGHT
NN NN RBIGRAM TIME ,
NN VBG WDPREVTAG , CLOSING
NN NNP WDPREVTAG NNP FUND
NN JJ WDNEXTTAG ASSISTANT NN
NN JJ WDNEXTTAG EQUIVALENT TO
NN NNP WDPREVTAG JJ HOSPITAL
NN NNP RBIGRAM HOME BOX
NN NN RBIGRAM OIL MINISTER
NN NNP LBIGRAM STAART GIANT
NN NNP WDPREVTAG NNP EQUITY
NN NNP WDAND2BFR & REPORT
NN NNP RBIGRAM ENERGY TRANSPORTATION
NN NNP PREV1OR2WD MARSHALL
NN NN PREV1OR2WD HIS
NN NN PREVWD MERCHANT
NN NNP PREVWD VALUE
NN NNP PREVWD WASTE
NN NNP PREVWD FRIED
NN VB SURROUNDTAG TO DT
NN NN CURWD SAFETY
NN NN NEXTWD HISTORY
NN NNP PREV2WD MUSEUM
NN NNP NEXTWD TRAVEL
NN NN PREVWD LAST
NN VBG NEXTWD PARTY
NN RB PREVWD ARE
NN NNP PREV2WD T.
NN NNP PREVWD UNIFICATION
NN JJ PREVBIGRAM VBZ VBN
NN VB SURROUNDTAG RB DT
NN PDT NEXTTAG PRP$
NN NNP LBIGRAM DAILY NEWS
NN NN RBIGRAM INVESTMENT BANK
NN NNP WDAND2BFR MANAGEMENT BUDGET
NN NNP WDAND2AFT MANAGEMENT BUDGET
NN NNP WDAND2AFT HOUSING URBAN
NN NNP LBIGRAM TAX COURT
NN NNP RBIGRAM PROTECTION AGENCY
NN NNP LBIGRAM PROTECTION AGENCY
NN NNP RBIGRAM COLOR SYSTEMS
NN NNP LBIGRAM URBAN DEVELOPMENT
NN NNP NEXT1OR2WD CO.
NN NNP WDPREVTAG NNP ORGANIZATION
NN NN WDAND2TAGBFR STAART STOCK
NN NNP WDAND2TAGAFT DISTRICT NNP
NN NNP WDNEXTTAG CHARTER CD
NN NNP WDPREVTAG NNP POST
NN NN NEXT1OR2WD MONDAY
NN NNP PREV2WD DEPARTMENTS
NN NNP NEXT2WD CARLA
NN NN NEXT2WD DEPARTMENT
NN NN CURWD MEMBER
NN VBG PREVWD FROM
NN NNP PREV2WD INSTITUTE
NN NN NEXTWD TUESDAY
NN NN PREVWD BUSH
NN NNP NEXTWD MAGAZINE
NN JJ NEXTWD OIL
NN NNP PREVWD MR.
NN VBG PREVBIGRAM VBG CC
NN VB PREVBIGRAM VB CC
NN NN PREVBIGRAM MD NN
NN VBP SURROUNDTAG NNPS DT
NN NN LBIGRAM NATIONAL SERVICE
NN NNP WDAND2BFR TRADE INDUSTRY
NN NNP LBIGRAM STATE FARM
NN NNP RBIGRAM CIRCUIT COURT
NN NNP RBIGRAM TAX COURT
NN JJ PREV1OR2WD COUPON
NN NN WDAND2TAGAFT COMPANY NNP
NN JJ WDPREVTAG , DEPUTY
NN JJ WDAND2TAGBFR IN GIANT
NN NN NEXT1OR2WD MAKER
NN NNP WDPREVTAG NN CITY
NN NNP WDAND2AFT OFFICE THRIFT
NN NN WDNEXTTAG DRUG NNP
NN JJ WDNEXTTAG OFFICIAL NNP
NN NNP NEXTWD PARTY
NN NN NEXT2WD COLLATERAL
NN NNP NEXTWD FARM
NN NN PREVWD RIGHTS
NN NN CURWD MANAGER
NN NN CURWD MORNING
NN VB PREVBIGRAM TO ``
NN NNP PREVBIGRAM : NNP
NN NN PREVBIGRAM CD NNS
NN VBG PREV2TAG MD
NN NNP LBIGRAM INVESTOR REPORT
NN NNP LBIGRAM INTERNAL REVENUE
NN NNP LBIGRAM WORLD BANK
NN NNP LBIGRAM SOCIAL SECURITY
NN NNP LBIGRAM REVENUE SERVICE
NN NNP RBIGRAM BANK OF
NN NNP LBIGRAM PROFESSIONAL INVESTOR
NN NNP WDPREVTAG NNP CENTER
NN NNP WDAND2TAGBFR NNP TRANSPORTATION
NN NN WDAND2TAGBFR , EXECUTIVE
NN NN WDAND2TAGAFT GROUP STAART
NN NNP WDAND2TAGBFR NNP SERVICE
NN NN WDAND2TAGBFR IN DEBT
NN JJ WDNEXTTAG FIRM NN
NN JJ WDNEXTTAG HALF NN
NN JJ WDNEXTTAG BOTTOM NN
NN JJ WDNEXTTAG MIDDLE NN
NN NNP PREV1OR2WD INSTITUTES
NN NN CURWD AGENCY
NN NNP PREVWD CRAY
NN NN CURWD ANALYST
NN VBG PREVWD BY
NN VBD PREVTAG PRP
NN NNP RBIGRAM CONTROL DATA
NN VBN PREVTAG VBD
NN NN WDPREVTAG JJ LEADER
NN NNP WDAND2TAGBFR NNP COURT
NN NNP WDPREVTAG NNP PARTY
NN NNP WDPREVTAG NNP STEEL
NN NNP WDPREVTAG NN OFFICE
NN VBG PREVWD BEEN
NN NNP PREVWD GULF
NN NNP NEXTWD CITY
NN VBG PREVWD AFTER
NN VBG NEXTTAG JJR
NN VBN PREVTAG VBZ
NN NN WDPREVTAG NNP TRADING
NN NNP WDAND2BFR AND COMMITTEE
NN NNP NEXT1OR2WD COMMITTEE
NN NNP LBIGRAM COMPREHENSIVE CARE
NN NN PREV1OR2WD GERMAN
NN NN PREVWD DECEMBER
NN VB PREV1OR2WD DO
NN JJ WDNEXTTAG OFFICIAL NNS
NN VBP PREVBIGRAM , WDT
NN NNP WDAND2BFR CAPITAL REPORT
NN NNP WDPREVTAG NNP AUTHORITY
NN NNP WDAND2TAGBFR NNP TRAVEL
NN VBG NEXTBIGRAM JJ NNS
NN NN CURWD DATE
NN NNP LBIGRAM MARKET INDEX
NN NNP WDAND2AFT FOOD DRUG
NN NNP WDNEXTTAG LITIGATION NNPS
NN NN WDAND2TAGBFR DT GROUP
NN NNP WDPREVTAG NNP GROUP
NN NNP WDAND2TAGBFR NNP FUND
NN NNP NEXTWD OFFICE
NN NNP WDAND2TAGAFT RADIO NNP
NN NNP LBIGRAM AIR FORCE
NN NN CURWD RATE
NN NN CURWD PARENT
NN NNP NEXT2WD COMMERCE
NN NNP LBIGRAM THIRD WORLD
NN NNP WDPREVTAG NN BOARD
NN JJ WDNEXTTAG RIGHT NN
NN NN PREVWD SALES
NN NNP RBIGRAM MARKET INDEX
NN NNP LBIGRAM EUROPEAN COMMUNITY
NN NN PREV1OR2WD REAL
NN NNP NEXTWD ASSOCIATES
NN NN CURWD YESTERDAY
NN NNP PREVWD RESERVE
NN NNP NEXTWD BANK
NN NNP WDAND2AFT HEALTH HUMAN
NN VB PREVBIGRAM TO RB
NN NNP WDAND2BFR BOARD TRADE
NN NN NEXT1OR2WD FIRM
NN NNP WDPREVTAG NNP NEWS
NN NNP PREVWD SCI
NN VB PREVWD HELP
NN NN WDAND2TAGAFT INVESTOR NNP
NN NNP SURROUNDTAG NNP NNP
NN NNP WDAND2AFT BOARD TRADE
NN NNP WDAND2TAGBFR NNP BANK
NN NN PREVWD EARNINGS
NN NN CURWD MARKET
NN VB SURROUNDTAG CC DT
NN NN PREVWD U.S.
NN VBG PREV1OR2WD ARE
NN NNP WDAND2TAGBFR NNP SCHOOL
NN NN WDPREVTAG NNS CONTRACT
NN JJ WDAND2AFT EXECUTIVE OF
NN NNP LBIGRAM WORLD SERIES
NN NNP NEXTWD BOARD
NN NN NEXT1OR2WD FRIDAY
NN NN CURWD FIRM
NN NNP RBIGRAM WORLD SERIES
NN VBG NEXTTAG PRP$
NN JJ WDNEXTTAG OFFICIAL NN
NN NNP LBIGRAM FEDERAL HOME
NN NNP RBIGRAM RALLY 'S
NN NNP NEXTWD &
NN NN NEXTBIGRAM NNP CD
NN VBP PREVWD WHO
NN JJ CURWD STOCK-INDEX
NN NNP WDAND2TAGBFR NNP COMMITTEE
NN VBG PREVTAG VBD
NN NN PREV1OR2WD A
NN VBP PREVBIGRAM NNS RB
NN NN PREVBIGRAM MD VB
NN RB WDNEXTTAG RIGHT RB
NN NNP WDPREVTAG NNP CAPITAL
NN NNP WDPREVTAG NN ADMINISTRATION
NN NNP PREVWD &
NN NNP PREVBIGRAM , NNP
NN PDT NEXTTAG DT
NN NNP NEXT1OR2WD ADMINISTRATION
NN VBG PREV1OR2WD IS
NN NNP WDPREVTAG NNP CITY
NN NNP LBIGRAM SUPREME COURT
NN NNP NEXTBIGRAM NN NNP
NN NNP NEXTBIGRAM NNS NNP
NN NNP WDAND2TAGAFT BANK NNP
NN VB PREVWD N'T
NN VBP PREVTAG NNS
NN NNP PREVBIGRAM IN NNP
NN VBG NEXTTAG DT
NN VBP PREVTAG PRP
NN NNP LBIGRAM BIG BOARD
NN NNP PREVBIGRAM STAART NNP
NN VB PREV1OR2TAG MD
NN VB PREVTAG TO
NN NNP NEXTTAG NNP
NNP NN LBIGRAM THE PARK
NNP JJ RBIGRAM EAST OF
NNP NNP NEXT1OR2WD PHYSICIANS
NNP JJ RBIGRAM NORTH AMERICAN
NNP NN WDPREVTAG JJ LEAGUE
NNP NN WDPREVTAG DT COUNTY
NNP NN WDPREVTAG DT MUSEUM
NNP NN WDAND2TAGBFR CD RESERVE
NNP NN WDNEXTTAG ENTERTAINMENT NNS
NNP NN WDPREVTAG JJ CHEMICAL
NNP NN WDAND2TAGBFR DT HOLIDAY
NNP JJ WDNEXTTAG SAUDI NN
NNP JJ WDNEXTTAG INTERSTATE NNS
NNP NN WDNEXTTAG WALL IN
NNP NN WDPREVTAG DT INSTITUTE
NNP NN WDNEXTTAG TRUST NNS
NNP NN WDAND2TAGBFR POS DEPARTMENT
NNP NN WDNEXTTAG JUSTICE .
NNP JJ WDNEXTTAG POSTAL NNS
NNP JJ WDNEXTTAG BRIDGE NNS
NNP JJ WDNEXTTAG STANDARD NN
NNP NN WDAND2TAGAFT AIR .
NNP NN WDAND2TAGBFR VBN RESOLUTION
NNP NNP WDNEXTTAG HOUSE .
NNP NN WDAND2TAGAFT MINISTER STAART
NNP NNP CURWD MR.
NNP NN PREV1OR2WD PROPERTY
NNP JJ NEXT1OR2WD PROFIT
NNP NN NEXT1OR2WD LOAN
NNP NNP CURWD TREASURY
NNP JJ NEXTWD CHINA
NNP FW PREVWD GENERALE
NNP NNP NEXTWD FORCE
NNP NN PREV2WD UNDER
NNP NNP NEXTWD NEKOOSA
NNP NNP NEXTWD MEDICAL
NNP NNS NEXTWD GERMANS
NNP NN PREVWD OPENING
NNP NN PREVWD TAX
NNP NN PREVWD '
NNP CC PREV1OR2OR3TAG IN
NNP VBZ PREV1OR2TAG PRP
NNP NN NEXTBIGRAM JJ IN
NNP NNS NEXTBIGRAM CC NNS
NNP NN SURROUNDTAG JJ ''
NNP VBN NEXT2TAG PRP$
NNP NN RBIGRAM ASSOCIATION WITH
NNP JJ LBIGRAM A NATIONAL
NNP NN WDNEXTTAG MASS NNS
NNP NN WDNEXTTAG STANDARD IN
NNP NN WDPREVTAG DT SENATOR
NNP JJ WDAND2TAGAFT NATIONAL VBG
NNP NN WDPREVTAG DT HURRICANE
NNP NN WDPREVTAG DT BROADCASTING
NNP NN WDNEXTTAG RESERVE IN
NNP NN WDNEXTTAG ROCK CC
NNP JJ WDPREVTAG IN WHITE
NNP NN WDPREVTAG DT PETROLEUM
NNP JJ WDNEXTTAG RANDOM NN
NNP JJ NEXT1OR2WD EUROPEAN
NNP JJ WDNEXTTAG REPUBLICAN NNS
NNP JJ NEXT2WD ADVISER
NNP JJ CURWD SPECIALIZED
NNP JJ PREV2WD MILESTONES
NNP NN PREV2WD ESTATE
NNP JJ RBIGRAM SOUTH KOREAN
NNP FW NEXTTAG FW
NNP VBP PREVTAG PRP
NNP NN WDPREVTAG PRP$ HOUSE
NNP NN WDPREVTAG DT BUREAU
NNP NN WDAND2BFR BLACK WHITE
NNP NN WDNEXTTAG BUREAU .
NNP NNP WDNEXTTAG ASSOCIATION IN
NNP IN WDAND2TAGAFT DE NNP
NNP NN WDNEXTTAG MOTOR NNS
NNP NN WDAND2TAGBFR DT STANDARD
NNP JJ WDPREVTAG PRP$ INTERNATIONAL
NNP NN WDPREVTAG DT AIR
NNP NN WDAND2TAGBFR NN BROADCASTING
NNP NNP NEXT1OR2WD &
NNP NNP PREVWD COMMODITY
NNP NN CURWD CROWN
NNP NN CURWD GUARD
NNP NN PREVBIGRAM PRP$ JJ
NNP NN SURROUNDTAG PRP$ .
NNP NNP NEXTBIGRAM NNS NNP
NNP JJ PREVTAG JJS
NNP NN WDPREVTAG IN DEPARTMENT
NNP NN WDAND2TAGBFR DT SECRETARY
NNP NN RBIGRAM SECRETARY ,
NNP NN LBIGRAM THE ASSOCIATION
NNP NN WDPREVTAG NN UNION
NNP NN WDPREVTAG NN HOUSE
NNP NN LBIGRAM THE LEAGUE
NNP JJ RBIGRAM INTERSTATE BANKING
NNP NN NEXTWD RATE
NNP NNP SURROUNDTAG NNP NN
NNP JJ WDAND2AFT NATIONAL .
NNP JJ NEXTWD RICAN
NNP JJ CURWD NORTHERN
NNP NNP NEXTWD STORES
NNP NN PREV2WD AN
NNP NN RBIGRAM DEPARTMENT AT
NNP NN WDNEXTTAG MINISTER ,
NNP NN NEXT1OR2WD STORE
NNP NNPS PREVWD GENERAL
NNP NN WDNEXTTAG CHEMICAL NNS
NNP NN WDAND2TAGBFR IN EXCHANGE
NNP JJ WDAND2TAGAFT AMERICAN NNS
NNP NNPS WDPREVTAG NNP COMMUNICATIONS
NNP NNP NEXTTAG NNP
NNP NNS CURWD COMMUNICATIONS
NNP NNP SURROUNDTAG TO CD
NNP VBN PREVTAG RB
NNP NN WDNEXTTAG ENTERTAINMENT NN
NNP NN WDPREVTAG DT TRUST
NNP NN WDAND2TAGBFR DT EXCHANGE
NNP NNP WDAND2TAGAFT AMERICAN NNP
NNP NNP RBIGRAM DEPARTMENT OF
NNP JJ PREVBIGRAM JJ CC
NNP JJ WDNEXTTAG WHITE NN
NNP JJ RBIGRAM GOLDEN SHARE
NNP NN WDPREVTAG NNS UNION
NNP JJ NEXTWD PRODUCT
NNP JJ WDNEXTTAG REPUBLICAN NN
NNP RB NEXTWD OF
NNP NN WDPREVTAG DT BRIDGE
NNP JJ RBIGRAM NATIONAL SERVICE
NNP NN WDAND2TAGBFR DT MINISTER
NNP JJ PREVWD AN
NNP JJ WDNEXTTAG GRAND NN
NNP NN WDPREVTAG DT STREET
NNP JJ WDNEXTTAG STANDARD JJ
NNP NN LBIGRAM THE DEPARTMENT
NNP JJ RBIGRAM NATIONAL OVER-THE-COUNTER
NNP JJ WDNEXTTAG INTERNATIONAL NNS
NNP NN SURROUNDTAG DT .
NNP NN WDPREVTAG IN EXCHANGE
NNP NN WDPREVTAG JJ EXCHANGE
NNP NN WDPREVTAG DT COMMISSION
NNP NN WDNEXTTAG UNION NNS
NNP VB PREVTAG MD
NNP SYM PREV1OR2WD STAART
NNP NN WDPREVTAG DT UNION
NNP VB PREVWD TO
NNP JJ NEXTWD GERMAN
NNP JJ WDNEXTTAG AMERICAN NNS
NNP NN WDPREVTAG DT EXCHANGE
VBD VBN WDAND2AFT INCLUDED THE
VBD VBN WDAND2AFT CONTINUED IN
VBD NN WDPREVTAG JJ THOUGHT
VBD NNP WDNEXTTAG ADVANCED JJ
VBD VBD WDAND2TAGAFT SAID NN
VBD JJ WDNEXTTAG ADVANCED NNS
VBD JJ NEXT1OR2WD AGENCY
VBD VBD NEXTWD BEEN
VBD VBD CURWD FELL
VBD VBN PREVBIGRAM NN POS
VBD VBD PREVTAG WDT
VBD VBN WDPREVTAG IN LOST
VBD VBN WDPREVTAG NNS BOUGHT
VBD JJ WDNEXTTAG INDICATED CD
VBD VBN SURROUNDTAG VB IN
VBD VBN PREVBIGRAM VBN CC
VBD JJ NEXTBIGRAM NNS VBD
VBD VBD WDAND2TAGBFR VBZ SAID
VBD VBD WDNEXTTAG SAID NNP
VBD JJ PREVTAG PRP$
VBD VBN LBIGRAM PREVIOUSLY REPORTED
VBD NNP PREVWD &
VBD NN PREV1OR2WD A
VBD JJ PREVWD OF
VBD VBN SURROUNDTAG STAART IN
VBD VBN WDNEXTTAG SIGNED IN
VBD VBD RBIGRAM HAD A
VBD VBN PREV1OR2WD BEEN
VBD VBN PREVWD AS
VBD VB PREV1OR2TAG MD
VBD VB PREVWD TO
VBD VBN PREVBIGRAM DT RB
VBD VBN PREVWD :
VBD VBN PREVBIGRAM VBD RB
VBD VBN PREVWD THE
VBD VBN PREVTAG VBG
VBD VBD PREVTAG PRP
VBD VBN WDNEXTTAG ENDED NNP
VBD VBN SURROUNDTAG DT NN
VBD VBN PREV2WD HAD
VBD VBN NEXTWD BY
VBD VBN PREV1OR2WD BE
VBD VBN PREV1OR2OR3TAG VBP
VBD VBN PREVTAG VBD
VBD VBN PREV1OR2TAG VBZ
VBN JJ WDAND2AFT CONCERNED THE
VBN VBD WDPREVTAG NN WEAKENED
VBN JJ WDNEXTTAG DAMAGED NNS
VBN VBD WDPREVTAG CC SOUGHT
VBN VBN WDAND2AFT CALLED ,
VBN VBD WDPREVTAG , CALLED
VBN VBN WDAND2TAGAFT INCREASED IN
VBN VBD WDPREVTAG NN INCREASED
VBN JJ WDNEXTTAG REQUIRED NN
VBN JJ WDNEXTTAG ENHANCED NN
VBN VBN PREV1OR2WD HAVING
VBN NNP NEXTBIGRAM NNS NNP
VBN VBN NEXTWD YESTERDAY
VBN JJ NEXTWD PREMIUM
VBN VBD PREVWD COURT
VBN VB PREV2WD DOES
VBN VBN PREV2WD WAS
VBN VBN PREV2WD N'T
VBN VBD PREVWD CDS
VBN JJ CURWD JUSTIFIED
VBN JJ PREVBIGRAM CC JJR
VBN VB PREVBIGRAM MD RB
VBN VBD SURROUNDTAG NNS PRP
VBN VBD SURROUNDTAG NNS JJR
VBN VBD PREVBIGRAM NNP JJ
VBN JJ WDNEXTTAG ALLEGED JJ
VBN JJ LBIGRAM LITTLE CHANGED
VBN VBD LBIGRAM AND SOLD
VBN VBD SURROUNDTAG NNS CD
VBN JJ NEXTWD EQUIPMENT
VBN NN PREVWD THE
VBN VBD PREVBIGRAM POS NN
VBN VBD SURROUNDTAG , CD
VBN VBN WDNEXTTAG BASED IN
VBN VBD WDPREVTAG NNS ESTIMATED
VBN VBD WDPREVTAG NN TRADED
VBN VBD SURROUNDTAG NN NNP
VBN JJ NEXTWD LOSSES
VBN VBD SURROUNDTAG , JJ
VBN VBD SURROUNDTAG NN $
VBN VBD SURROUNDTAG NNS $
VBN VBD SURROUNDTAG CC PRP
VBN VBD SURROUNDTAG , RB
VBN VBD NEXTWD HIM
VBN VBN NEXTWD BY
VBN VBN PREVWD BE
VBN VBD PREVBIGRAM VBZ PRP
VBN NN NEXTWD OF
VBN VBD PREVBIGRAM , CC
VBN VBN PREV1OR2WD HAVE
VBN VBD SURROUNDTAG , NNP
VBN VBD PREVTAG NNPS
VBN VBD SURROUNDTAG NNS NNP
VBN VBD SURROUNDTAG NN PRP
VBN VBD SURROUNDTAG NN CD
VBN VBD SURROUNDTAG NNS NN
VBN VBN PREV1OR2WD HAD
VBN VBD SURROUNDTAG NNS JJ
VBN VB PREVTAG MD
VBN VBD PREVBIGRAM PRP RB
VBN VBD WDNEXTTAG INCREASED CD
VBN VBN PREV1OR2WD HAS
VBN VB PREVTAG TO
VBN VBD SURROUNDTAG NNS NNS
VBN VBD NEXTTAG PRP$
VBN VBD SURROUNDTAG NN NN
VBN VBD SURROUNDTAG NN JJ
VBN VBD PREVBIGRAM NNP RB
VBN VBD PREVTAG WP
VBN VBD PREVWD WHICH
VBN VBD PREVWD THAT
VBN VBN SURROUNDTAG VBD DT
VBN VBN PREV1OR2TAG VBP
VBN VBN PREV1OR2TAG VBZ
VBN VBD PREVTAG NNP
VBN VBD PREVTAG PRP
VBN VBD NEXTTAG DT
JJ NNP RBIGRAM NEW DEMOCRACY
JJ JJ WDAND2TAGAFT COMMERCIAL NN
JJ RB WDAND2TAGBFR VBD MUCH
JJ RB WDNEXTTAG LONG RB
JJ VBN WDAND2TAGBFR NN TROUBLED
JJ NN WDPREVTAG JJ PROGRAM-TRADING
JJ NN WDNEXTTAG PUBLIC IN
JJ RB WDNEXTTAG LITTLE JJ
JJ JJ WDNEXTTAG RIVAL NNP
JJ JJ WDNEXTTAG KEY NNP
JJ NNP WDAND2TAGAFT HIGH VBG
JJ JJ WDAND2TAGBFR IN CENTRAL
JJ NNP WDPREVTAG NNP MAJOR
JJ NNP WDAND2TAGBFR IN SQUARE
JJ RB WDNEXTTAG OVERSEAS IN
JJ VBN WDPREVTAG DT DETAILED
JJ NN WDNEXTTAG LONG-DISTANCE NNS
JJ JJ CURWD OTHER
JJ JJ CURWD POLITICAL
JJ NNP NEXT1OR2WD COMMITTEE
JJ NNP NEXT1OR2WD SONY
JJ NN NEXT2WD ASSUMPTION
JJ JJ NEXTWD WHITE
JJ JJ CURWD GERMAN
JJ JJ CURWD FORMER
JJ NNP PREVWD SUPREME
JJ JJ CURWD SUBURBAN
JJ NN PREVWD EXPECTS
JJ JJ NEXTWD STANDARD
JJ JJ NEXTWD TREASURY
JJ NNP NEXTWD EGGS
JJ NNP PREVWD PARTNERS
JJ NN NEXTWD WAS
JJ NNP NEXT2WD ASSOCIATION
JJ RB PREVWD DO
JJ DT NEXTBIGRAM IN WP
JJ NN SURROUNDTAG DT :
JJ NNP PREV2WD JONES
JJ NN SURROUNDTAG JJ ,
JJ NN SURROUNDTAG JJ :
JJ NN SURROUNDTAG CD IN
JJ NN NEXTTAG WRB
JJ RBR NEXTTAG VBN
JJ NNP LBIGRAM GREAT WESTERN
JJ NNP RBIGRAM FEDERAL PAPER
JJ JJ WDNEXTTAG FLAT VBN
JJ RB WDAND2TAGBFR NNS MUCH
JJ RB WDAND2TAGAFT MUCH PRP$
JJ RB WDNEXTTAG MUCH RB
JJ JJ WDNEXTTAG INDEPENDENT IN
JJ JJ WDPREVTAG DT PREFERRED
JJ RB WDNEXTTAG DAILY .
JJ NNP WDNEXTTAG EUROPEAN JJ
JJ NN WDNEXTTAG FUTURE IN
JJ NNP WDNEXTTAG DAILY VBD
JJ JJ WDNEXTTAG AVERAGE NNP
JJ JJ WDNEXTTAG CONGRESSIONAL NNPS
JJ NN WDNEXTTAG CHIEF NNS
JJ JJ WDAND2TAGBFR DT PRIME
JJ RB WDNEXTTAG LIKELY MD
JJ NNP RBIGRAM INDUSTRIAL BANK
JJ NNP PREV2WD COUNCIL
JJ NNP NEXT2WD SAVINGS
JJ VB PREV2WD DOES
JJ JJ WDNEXTTAG TORONTO-BASED NNP
JJ JJ NEXTWD GNP
JJ JJ RBIGRAM PREFERRED SHARES
JJ NNP WDAND2BFR LOS SUPERIOR
JJ NN WDAND2BFR TO THIRD-QUARTER
JJ NN PREVBIGRAM POS NNP
JJ VBN SURROUNDTAG NNS IN
JJ NN SURROUNDTAG DT RB
JJ NN SURROUNDTAG JJ TO
JJ NN SURROUNDTAG NN POS
JJ RBR PREVTAG NN
JJ NNP WDAND2AFT ENVIRONMENTAL AGENCY
JJ NNP RBIGRAM DAILY NEWS
JJ NN RBIGRAM BLACK AND
JJ NNP RBIGRAM COMMON CAUSE
JJ NNP RBIGRAM FEDERAL SAVINGS
JJ RB WDNEXTTAG LATE .
JJ JJ WDNEXTTAG SMALL NNP
JJ NNP WDAND2TAGAFT PUBLIC NNP
JJ NNP RBIGRAM FINANCIAL TIMES
JJ JJ CURWD CONSERVATIVE
JJ NNP NEXTWD WORLD
JJ JJ CURWD FRENCH
JJ JJ NEXTWD DEPARTMENT
JJ NN NEXTBIGRAM CC NN
JJ NNP NEXT2WD OFFICE
JJ JJ PREVTAG PRP$
JJ VBN CURWD PREFERRED
JJ NNP PREVWD EUROPEAN
JJ NN SURROUNDTAG POS .
JJ NN SURROUNDTAG DT POS
JJ NNP SURROUNDTAG NNP VBZ
JJ VBN NEXT2TAG PRP$
JJ VBN PREVTAG VBZ
JJ RB WDNEXTTAG HARD IN
JJ JJ WDPREVTAG DT POOR
JJ JJ WDNEXTTAG TOP NNP
JJ NNP RBIGRAM GENERAL MILLS
JJ NNP RBIGRAM MONETARY FUND
JJ VBP PREV1OR2WD THEY
JJ NNP NEXT2WD INSURANCE
JJ NNP NEXTWD HOSPITAL
JJ NNP PREVWD MR.
JJ JJ CURWD OLD
JJ PDT SURROUNDTAG VB DT
JJ JJ LBIGRAM THE FIRST
JJ NN SURROUNDTAG DT VBZ
JJ VBD NEXTTAG DT
JJ RB WDNEXTTAG FURTHER IN
JJ JJ WDNEXTTAG MAJOR NNP
JJ RB WDNEXTTAG OVERSEAS ,
JJ NN LBIGRAM ON AVERAGE
JJ RB LBIGRAM VERY MUCH
JJ NNP RBIGRAM URBAN DEVELOPMENT
JJ NNP RBIGRAM SOCIAL SECURITY
JJ NNP NEXT2WD SERVICE
JJ NN SURROUNDTAG CC VBG
JJ RB WDNEXTTAG OVERSEAS .
JJ JJ WDPREVTAG DT PRIME
JJ RB WDAND2AFT FURTHER STAART
JJ VBN NEXTWD BY
JJ NNPS SURROUNDTAG DT VBP
JJ JJ SURROUNDTAG TO NNS
JJ IN SURROUNDTAG NN NNP
JJ NNP PREV1OR2WD &
JJ NNP RBIGRAM COMPREHENSIVE CARE
JJ NNP RBIGRAM BIG THREE
JJ VBN NEXT1OR2WD WITH
JJ NNP NEXT1OR2WD COMMISSION
JJ JJ CURWD SENIOR
JJ JJ CURWD CORPORATE
JJ NN SURROUNDTAG DT VBD
JJ VBN NEXTTAG TO
JJ NNP WDAND2AFT MAJOR INDEX
JJ JJ WDPREVTAG DT THIRD
JJ VBG NEXT1OR2TAG DT
JJ NNP NEXT2WD ADMINISTRATION
JJ JJ PREVWD NEW
JJ RB SURROUNDTAG MD VB
JJ RBR NEXTTAG ,
JJ JJ WDAND2TAGAFT GROSS NN
JJ NNP WDPREVTAG CC HUMAN
JJ IN WDPREVTAG NNS NEXT
JJ NN NEXTBIGRAM MD VB
JJ NNP PREV1OR2WD JONES
JJ NN SURROUNDTAG JJ .
JJ VB NEXTTAG DT
JJ JJ CURWD LONG-TERM
JJ RB WDNEXTTAG EARLY DT
JJ VB PREVBIGRAM MD RB
JJ NN SURROUNDTAG DT TO
JJ NN WDPREVTAG NN CHIEF
JJ JJ CURWD NEXT
JJ NNP NEXT1OR2WD CORP.
JJ JJ NEXTWD EXCHANGE
JJ JJ NEXTBIGRAM , JJ
JJ RB WDNEXTTAG LATE IN
JJ NNP RBIGRAM EUROPEAN COMMUNITY
JJ NNP WDPREVTAG NNP HIGH
JJ NN SURROUNDTAG JJ IN
JJ JJ CURWD MANY
JJ NNP WDPREVTAG NNP MEDICAL
JJ NNP WDPREVTAG NNP FINANCIAL
JJ NN WDNEXTTAG NET VBD
JJ JJ LBIGRAM THE FIRST
JJ NN SURROUNDTAG IN .
JJ NN SURROUNDTAG DT IN
JJ NNP WDAND2AFT FEDERAL LOAN
JJ NNP NEXTWD YORK-BASED
JJ JJ WDNEXTTAG EARLY NNP
JJ RB NEXTTAG VBD
JJ RB WDNEXTTAG LONG IN
JJ NN WDAND2BFR THE AVERAGE
JJ NN SURROUNDTAG DT ,
JJ RB WDNEXTTAG EARLY IN
JJ NNP NEXTBIGRAM NNS NNP
JJ NNP NEXT1OR2WD &
JJ RB NEXTTAG VBN
JJ JJ CURWD OTHER
JJ NN SURROUNDTAG DT .
JJ VB PREVTAG MD
JJ JJ WDNEXTTAG LATE NNP
JJ NNP SURROUNDTAG NNP ,
JJ JJ CURWD FORMER
JJ NNP NEXTTAG POS
JJ NNP NEXTTAG NNPS
JJ JJ NEXTWD U.S.
JJ RB WDNEXTTAG MUCH JJR
JJ JJ NEXTBIGRAM NNP CD
JJ VB PREVWD TO
JJ NNP RBIGRAM BIG BOARD
JJ NNP PREV1OR2WD JONES
JJ NN NEXTWD OF
JJ NNP NEXTTAG NNP
NNPS NNP RBIGRAM INDUSTRIES PLC
NNPS NNS WDPREVTAG DT BROTHERS
NNPS NNS WDAND2TAGBFR DT BROTHERS
NNPS NNP WDAND2TAGAFT BROTHERS ,
NNPS NNP PREV1OR2WD NORTHWEST
NNPS NNP PREVWD &
NNPS NNS NEXTTAG TO
NNPS NNS PREV2TAG NNS
NNPS NNS PREV1OR2WD OTHER
NNPS NNS NEXT1OR2TAG VBG
NNPS NNP PREV1OR2WD SINGAPORE
NNPS NNS WDPREVTAG NN INDUSTRIES
RB IN WDNEXTTAG DOWN JJR
RB IN WDNEXTTAG SO NNS
RB JJ WDNEXTTAG ONLY NNP
RB IN WDAND2AFT UP IN
RB RBR WDPREVTAG VB LONGER
RB IN PREVWD CLEAN
RB RBR SURROUNDTAG DT IN
RB IN SURROUNDTAG NN TO
RB JJ SURROUNDTAG IN NN
RB IN RBIGRAM UP SLIGHTLY
RB IN WDAND2BFR YEAR DOWN
RB IN PREVWD PRICES
RB RP WDNEXTTAG UP JJ
RB IN RBIGRAM SO THAT
RB RP NEXTBIGRAM NN NNS
RB JJR WDNEXTTAG LONGER NNS
RB CC WDNEXTTAG YET PRP
RB IN NEXT2WD SALE
RB NN PREVBIGRAM IN DT
RB RP WDNEXTTAG UP VBG
RB JJ WDNEXTTAG ENOUGH NNS
RB RP WDPREVTAG PRP UP
RB RP NEXTTAG PRP$
RB IN LBIGRAM CLOSED DOWN
RB RP RBIGRAM UP FOR
RB RP WDNEXTTAG UP NNS
RB VB WDPREVTAG TO BACK
RB JJ WDNEXTTAG ONLY NNS
RB NNP RBIGRAM FAR EAST
RB JJ SURROUNDTAG IN NNS
RB RP WDNEXTTAG DOWN DT
RB IN WDNEXTTAG SO DT
RB RP WDPREVTAG VBN UP
RB JJ WDNEXTTAG ENOUGH NN
RB IN WDNEXTTAG SO PRP
RB RP WDPREVTAG VBG UP
RB RP WDAND2BFR TO UP
RB IN WDNEXTTAG UP TO
RB JJ SURROUNDTAG DT NN
RB RP WDNEXTTAG UP DT
VBP VBP CURWD ARE
VBP NN WDNEXTTAG NEED IN
VBP NN WDPREVTAG JJ HOPE
VBP VB PREV1OR2WD DO
VBP NN PREVTAG POS
VBP NN PREVWD NO
VBP VB WDPREVTAG CC SAY
VBP MD NEXTBIGRAM RB VB
VBP VB PREV1OR2WD DID
VBP VB SURROUNDTAG , ,
VBP VB PREV1OR2WD DOES
VBP NN PREV1OR2WD A
VBP VB PREV1OR2WD NOT
VBP NN PREVWD THE
VBP VB PREV1OR2WD N'T
VBP VB PREVWD TO
VBP VB PREV1OR2OR3TAG MD
CC RB NEXT2TAG STAART
CC DT PREV1OR2TAG IN
POS PRP PREVBIGRAM STAART VB
POS '' PREV2WD `
POS VBZ NEXTWD A
POS NNP PREVWD A
POS '' PREVTAG ,
POS '' WDPREVTAG NN '
POS '' NEXT1OR2WD STAART
POS VBZ PREVTAG WP
POS VBZ PREV1OR2TAG EX
POS VBZ PREVWD THAT
POS VBZ PREV1OR2TAG PRP
IN RP WDNEXTTAG OUT NN
IN RB WDPREVTAG VBG ALONG
IN RP PREVWD TURN
IN IN NEXT2WD REPORTED
IN WDT PREVWD ONE
IN IN NEXTBIGRAM RB DT
IN WDT SURROUNDTAG '' VBZ
IN IN SURROUNDTAG TO CD
IN WDT NEXTBIGRAM NNS JJ
IN RB SURROUNDTAG CC $
IN WDT SURROUNDTAG JJ VBZ
IN RB SURROUNDTAG RB ,
IN RB RBIGRAM OUT AT
IN RB RBIGRAM OVER AND
IN IN WDAND2TAGBFR VBD ABOUT
IN RB WDAND2TAGAFT AS ''
IN VBP WDPREVTAG PRP LIKE
IN RP WDAND2BFR THIS AROUND
IN RP NEXTWD ?
IN IN NEXTTAG PRP
IN IN SURROUNDTAG NN IN
IN RB SURROUNDTAG , .
IN DT NEXT1OR2OR3TAG STAART
IN IN RBIGRAM ABOUT 3
IN RB LBIGRAM FOR ABOUT
IN IN WDAND2TAGBFR , ABOUT
IN RB WDAND2AFT ABOUT %
IN FW WDAND2TAGAFT VS. NN
IN IN WDAND2BFR AS AS
IN WDT SURROUNDTAG , VBZ
IN DT SURROUNDTAG CC VBD
IN RB SURROUNDTAG VB ,
IN RP WDNEXTTAG OUT NNS
IN RP RBIGRAM OUT THAT
IN RP WDNEXTTAG OUT PRP$
IN RB WDNEXTTAG BELOW VBP
IN VB PREVWD N'T
IN DT PREVWD DO
IN DT PREVWD TO
IN IN NEXTBIGRAM NN NNP
IN IN WDAND2BFR HE THAT
IN DT SURROUNDTAG : VBZ
IN IN WDAND2TAGAFT AS ,
IN JJ WDNEXTTAG OUTSIDE NNS
IN DT SURROUNDTAG CC VBZ
IN RB WDNEXTTAG BEFORE .
IN RP WDNEXTTAG OUT .
IN WDT SURROUNDTAG NNS NN
IN NN WDPREVTAG DT WHILE
IN WDT NEXTBIGRAM RB VBZ
IN RB WDNEXTTAG AS RB
IN JJ WDNEXTTAG OUTSIDE NN
IN IN PREVWD OUT
IN WDT SURROUNDTAG NNP VBZ
IN WDT SURROUNDTAG NNS VBZ
IN JJ PREVWD THE
IN WDT SURROUNDTAG NN POS
IN RB SURROUNDTAG , ,
IN IN WDNEXTTAG THAT DT
IN DT PREVTAG IN
IN WDT SURROUNDTAG NNS RB
IN VB PREVTAG MD
IN DT NEXT1OR2TAG .
IN IN NEXTBIGRAM NN NNS
IN RP WDNEXTTAG OUT DT
IN DT NEXTTAG POS
IN WDT NEXTTAG VBN
IN WDT NEXTTAG VB
IN DT PREV1OR2WD STAART
IN WDT NEXTTAG VBP
IN DT NEXTTAG NN
IN WDT NEXTTAG VBD
IN WDT SURROUNDTAG NN VBZ
IN WDT NEXTTAG MD
IN RB WDAND2AFT AS AS
IN DT PREV1OR2WD STAART
DT DT NEXTBIGRAM RB JJ
DT DT LBIGRAM `` ALL
DT UH NEXTTAG .
DT NNP LBIGRAM CLASS A
DT SYM NEXT1OR2WD -
DT NNP RBIGRAM A 'S
DT PDT WDNEXTTAG ALL DT
DT RB WDNEXTTAG NO RB
VB VBP WDPREVTAG NN APPEAR
VB NNP WDNEXTTAG MOUNT NNP
VB VBP PREVWD SOME
VB VBP PREVWD MOST
VB VBP PREVWD BOTH
VB JJ NEXTBIGRAM VB IN
VB NNP PREVBIGRAM IN ``
VB VBP PREVBIGRAM WDT RB
VB VBP PREVBIGRAM CD ,
VB VB PREV2WD DO
VB VBD PREVWD IT
VB NN SURROUNDTAG NNP .
VB VBP PREVWD }
VB NN WDPREVTAG NNS CUT
VB JJ WDPREVTAG IN CLOSE
VB VBD WDPREVTAG CC PUT
VB NNP WDPREVTAG DT STICK
VB NNP NEXTTAG NNPS
VB JJ SURROUNDTAG DT JJ
VB NNP PREVWD COMMON
VB VBN PREV1OR2WD BEEN
VB NN PREVWD DECLINED
VB VB PREVWD THAN
VB VB PREV2WD LET
VB NN PREVBIGRAM VB DT
VB NN PREVTAG JJR
VB JJ WDNEXTTAG CLOSE NN
VB VBP PREVWD ALL
VB VBP PREVBIGRAM WP RB
VB VBP SURROUNDTAG NNP TO
VB JJ PREVWD IS
VB NN PREVTAG VBG
VB VBD WDPREVTAG NN PUT
VB VBP SURROUNDTAG NN DT
VB VBP SURROUNDTAG , DT
VB VBN NEXT1OR2WD BY
VB NN NEXTWD OF
VB VBD PREVTAG NNP
VB VBP PREVTAG NNPS
VB JJ SURROUNDTAG DT NN
VB NNP PREVTAG NNP
VB VB CURWD BE
VB VBP PREVBIGRAM DT NNS
VB VBP PREVBIGRAM PRP RB
VB VBN PREVTAG VBD
VB VB PREVBIGRAM VB PRP
VB VBN PREV1OR2WD BE
VB NN PREVTAG PRP$
VB VB PREV1OR2OR3TAG MD
VB VBP PREVTAG WDT
VB RB NEXTTAG TO
VB VBN PREVTAG VBP
VB VBP PREVBIGRAM NNS RB
VB NN PREVTAG POS
VB NN PREVTAG JJ
VB VBP PREVTAG WP
VB VBN PREV1OR2WD HAS
VB VBP PREVWD THAT
VB NN PREVTAG NN
VB NN PREVTAG IN
VB VBP PREVTAG PRP
VB NN PREV1OR2TAG DT
VB VBP PREVTAG NNS
PRP NNP NEXT1OR2WD FACILITIES
PRP NN NEXTTAG )
VBZ NNS PREVWD ANY
VBZ VBZ NEXTBIGRAM CC VBZ
VBZ NNS NEXTWD AND
VBZ NNS PREVWD OF
VBZ NN PREVWD A
VBZ VBZ PREV1OR2TAG PRP
VBZ NNS WDNEXTTAG SHOWS ,
VBZ NNS NEXTWD WERE
VBZ NNP PREVWD &
VBZ NNS SURROUNDTAG POS IN
VBZ NNP WDPREVTAG CC MEANS
VBZ VBZ SURROUNDTAG NNP .
VBZ NNS SURROUNDTAG JJ ,
VBZ NNS PREVTAG PRP$
VBZ VBZ CURWD IS
VBZ NNS SURROUNDTAG JJ IN
VBZ NNS PREVWD PHONE
VBZ NNS PREVWD THE
VBZ NNS NEXTTAG VBP
VBZ NNS NEXT2TAG STAART
VBZ NNS NEXTWD OF
VBG NNP WDAND2BFR WAY BUYING
VBG NN WDAND2AFT SELLING THE
VBG NN LBIGRAM 'S SELLING
VBG VBG CURWD MANAGING
VBG NN NEXT2WD FLOW
VBG VBG PREVWD REPORTED
VBG NN SURROUNDTAG DT IN
VBG NN SURROUNDTAG NN CC
VBG NN SURROUNDTAG NN VBZ
VBG NN RBIGRAM PURCHASING MANAGERS
VBG VBG PREVBIGRAM DT NN
VBG NN PREV1OR2WD FUTURES
VBG NN PREV1OR2WD ITS
VBG NN SURROUNDTAG NN ,
VBG NN WDPREVTAG DT BUYING
VBG VBG WDNEXTTAG HOLDING NN
VBG JJ LBIGRAM THE FOLLOWING
VBG NN PREV1OR2WD NATIONAL
VBG NN WDPREVTAG DT BEGINNING
VBG NN RBIGRAM OPERATING PROFIT
VBG NNP SURROUNDTAG NNP NNP
VBG NNP NEXTWD MATERIALS
VBG NN SURROUNDTAG DT ,
VBG NN WDNEXTTAG OPERATING NNS
VBG NN SURROUNDTAG NN .
VBG NN WDPREVTAG DT SELLING
VBG VBG RBIGRAM OPERATING OFFICER
VBG NN NEXTWD OF
VBG NN PREVTAG JJ
JJS JJS NEXT2WD BONDS
JJS RBS NEXTTAG VBN
JJS JJS SURROUNDTAG IN JJ
JJS RBS WDNEXTTAG MOST RB
JJS RBS WDNEXTTAG MOST JJ
JJR RB WDAND2TAGBFR VBN BETTER
JJR NNP PREVTAG NNP
JJR RBR NEXT1OR2WD LIKE
JJR RBR NEXT1OR2WD WITH
JJR RBR PREV1OR2WD GO
JJR RBR PREVWD CARE
JJR RBR PREVWD DOWN
JJR RBR NEXT2WD OFFSET
JJR RBR NEXT1OR2TAG ``
JJR RBR NEXTBIGRAM IN RB
JJR RBR SURROUNDTAG NN .
JJR RBR PREV1OR2WD DRIFTED
JJR RBR NEXTWD ON
JJR RBR CURWD HARDER
JJR JJR WDNEXTTAG LOWER JJ
JJR RBR WDNEXTTAG LESS RB
JJR RBR NEXT2WD DOUBLE
JJR JJR WDNEXTTAG HIGHER JJ
JJR RBR PREV1OR2WD PRICES
JJR VB NEXTTAG DT
JJR CC NEXT1OR2WD FEES
JJR RBR NEXTBIGRAM IN VBD
JJR JJR NEXT2TAG NNS
JJR RBR NEXTTAG VBN
JJR RBR WDNEXTTAG MORE RB
JJR RBR NEXTTAG JJ
RBR RB NEXTBIGRAM , VBG
RBR JJR NEXTTAG NN
RBR JJR NEXT1OR2TAG NNS
RBR JJR PREVTAG DT
MD NNP WDNEXTTAG MAY NNP
MD NNP WDNEXTTAG MAY .
MD NNP NEXTTAG CD
MD NN PREVWD GOOD
MD NNP LBIGRAM IN MAY
RP RP NEXT1OR2OR3TAG JJ
RP RP PREVBIGRAM TO VB
RP JJ PREVWD WAS
RP IN NEXTBIGRAM DT NNP
RP IN NEXT1OR2TAG NN
RP IN PREV1OR2OR3TAG ,
PRP$ PRP WDNEXTTAG HER .
PRP$ PRP NEXTTAG IN
PRP$ PRP NEXTTAG TO
EX EX NEXTWD WERE
EX RB PREVTAG NNS
EX RB NEXT1OR2TAG IN
EX RB NEXTTAG ,
EX RB NEXT1OR2TAG .
