# Supplementary material for: ScholarLens: extracting competences from research publications for the automatic generation of semantic user profiles
Source: PeerJ journal article supplement (doi:10.7717/peerj-cs.121), 2017-07-03
Supplement: Pipeline.zip [file Pipeline.zip › Pipeline/gate/plugins/ANNIE/resources/heptag/ruleset]

NNS VBZ LBIGRAM , claims
NNS NNS CURWD prices
NNS VBZ NEXTBIGRAM CD NNS
NNS NNS PREV1OR2WD with
NNS NNS PREVWD back
NNS VBZ SURROUNDTAG NNP NNS
NNS VBZ NEXT2TAG POS
NNS VBZ LBIGRAM company plans
NNS VBZ PREVWD group
NNS NNS CURWD employees
NNS NN WDAND2TAGBFR DT data
NNS CD NEXT1OR2OR3TAG IN
NNS VBZ PREVBIGRAM VBZ CC
NNS VBZ RBIGRAM estimates that
NNS VBZ WDPREVTAG NNP claims
NNS NNPS WDAND2TAGAFT Investors NNP
NNS VBZ SURROUNDTAG NN NNS
NNS VBZ NEXTTAG PRP$
NNS NNPS LBIGRAM zero-coupon CDs
NNS VBZ SURROUNDTAG , TO
NNS NNP SURROUNDTAG NNP NNP
NNS CD PREV1OR2WD in
NNS NNS PREV1OR2WD up
NNS VBZ NEXTBIGRAM JJ NNS
NNS NNS SURROUNDTAG CD DT
NNS VBZ NEXTWD a
NNS NNS SURROUNDTAG NNP :
NNS NNPS PREVTAG NNP
NNS NNS PREV1OR2OR3TAG VB
NNS VBZ NEXTBIGRAM NNP NNP
NNS VBZ WDPREVTAG NNP plans
NNS VBZ PREVWD who
NNS NN WDPREVTAG DT yen
NNS VBZ PREVBIGRAM NNP ,
NNS VBZ PREVTAG RB
NNS VBZ PREV2WD Mr.
NNS VBZ NEXTWD the
NNS VBZ PREVBIGRAM , WDT
NNS NNP NEXTTAG NNP
NNS VBZ PREVTAG PRP
NNP NNPS WDAND2TAGBFR NNP Foods
NNP JJ WDNEXTTAG Republican NNS
NNP NNPS WDAND2TAGAFT Affairs NNP
NNP JJ RBIGRAM North American
NNP JJ RBIGRAM Central American
NNP NNP SURROUNDTAG NNP POS
NNP NNPS PREV1OR2WD Texas
NNP NN PREV2WD Mortgage-Backed
NNP FW PREVWD Generale
NNP NN NEXTWD Activity
NNP NNP WDAND2TAGBFR STAART London
NNP NNPS WDAND2TAGBFR STAART Holdings
NNP JJ SURROUNDTAG NNS NNS
NNP JJ SURROUNDTAG `` NNS
NNP RB SURROUNDTAG STAART IN
NNP VBG NEXTTAG DT
NNP NNPS WDAND2TAGBFR IN Appropriations
NNP JJ WDNEXTTAG Communist NN
NNP JJ WDNEXTTAG Average JJ
NNP NN PREVBIGRAM NNP )
NNP NN NEXT2WD quoted
NNP JJ SURROUNDTAG `` NN
NNP NN SURROUNDTAG `` NN
NNP NN CURWD van
NNP JJ WDNEXTTAG Saudi NN
NNP NNPS WDAND2TAGAFT Communications VBD
NNP NN NEXT1OR2WD B
NNP NN WDPREVTAG STAART Money
NNP NNPS PREVWD General
NNP NNS SURROUNDTAG STAART IN
NNP JJ NEXTWD Rican
NNP NN NEXTWD 1989
NNP NNPS CURWD Partners
NNP NNPS WDPREVTAG IN Farmers
NNP JJ WDNEXTTAG Western NN
NNP JJ WDAND2TAGAFT South NN
NNP JJ NEXT1OR2WD European
NNP NNP CURWD Jaguar
NNP NN SURROUNDTAG `` NNS
NNP IN CURWD de
NNP NNS WDAND2TAGBFR STAART Markets
NNP RB SURROUNDTAG STAART ,
NNP JJ WDNEXTTAG Western NNS
NNP JJ WDNEXTTAG Republican NN
NNP NNPS CURWD Systems
NNP JJ WDNEXTTAG American JJ
NNP NNP CURWD U.S.
NNP JJ SURROUNDTAG STAART NN
NNP JJ NEXTWD German
NNP NN SURROUNDTAG STAART NN
NNP JJ SURROUNDTAG STAART NNS
NNP JJ WDNEXTTAG American NN
NNP JJ WDNEXTTAG American NNS
NNP NN SURROUNDTAG STAART NNS
CD LS NEXTTAG )
CD NNS PREV1OR2OR3TAG JJ
CD NN PREVWD No
CD PRP NEXTTAG MD
CD LS PREVTAG STAART
NN JJ RBIGRAM call options
NN JJ WDNEXTTAG front NNS
NN JJ WDNEXTTAG alternative NN
NN JJ WDAND2TAGAFT stock-market IN
NN VBG WDNEXTTAG opening NN
NN JJ WDNEXTTAG front NN
NN NN PREVBIGRAM VBZ DT
NN JJ RBIGRAM right .
NN JJ WDNEXTTAG right NNS
NN NN WDPREVTAG TO time
NN VBP WDAND2AFT fall points
NN JJ LBIGRAM been executive
NN VBN PREV1OR2WD be
NN NN CURWD safety
NN VBG NEXTWD party
NN JJ CURWD foreign-exchange
NN NN CURWD Activity
NN VB PREVWD do
NN VBG PREVWD before
NN VBG PREVWD resume
NN NNP NEXTBIGRAM POS DT
NN VB SURROUNDTAG CC PRP$
NN VB SURROUNDTAG CC PRP
NN VB SURROUNDTAG CC JJ
NN VBG PREVBIGRAM VBG CC
NN VBG PREVBIGRAM IN RB
NN VBG SURROUNDTAG , JJ
NN VBG SURROUNDTAG NNS IN
NN VBN PREVTAG VBP
NN VBG PREVWD by
NN JJ WDNEXTTAG alternative NNS
NN VBD WDPREVTAG NN spread
NN NN WDAND2TAGBFR NN market
NN NNS WDNEXTTAG police IN
NN JJ WDNEXTTAG equivalent TO
NN NN CURWD program
NN NN PREV2WD according
NN RB PREVWD are
NN JJ NEXTWD oil
NN VBP PREVBIGRAM PRP RB
NN VB PREVBIGRAM CC RB
NN VB PREVBIGRAM RB RB
NN PDT NEXTTAG PRP$
NN VBG PREV2TAG MD
NN JJ WDNEXTTAG gold NNS
NN VBG LBIGRAM , closing
NN NN NEXTTAG VBD
NN VB PREVBIGRAM VB CC
NN VBP SURROUNDTAG NNPS DT
NN NN NEXTBIGRAM CD CC
NN JJ WDNEXTTAG giant NN
NN JJ SURROUNDTAG , JJ
NN JJ PREV1OR2WD coupon
NN VB PREVBIGRAM TO ``
NN JJ WDNEXTTAG bottom NN
NN NN PREVBIGRAM MD NN
NN NN PREVWD sales
NN VBG PREVWD after
NN VBG PREVWD been
NN VBG NEXTBIGRAM NN NNS
NN VBG NEXTBIGRAM JJ NNS
NN VBD PREVTAG PRP
NN JJ WDNEXTTAG half NN
NN JJ WDNEXTTAG firm NN
NN NN WDPREVTAG TO date
NN VBN PREVTAG VBZ
NN VBN PREVTAG VBD
NN NN CURWD rate
NN NN PREVWD rights
NN VB PREVWD not
NN VBP PREVTAG WDT
NN JJ WDNEXTTAG official NNS
NN VBG NEXT1OR2TAG JJR
NN JJ SURROUNDTAG DT NNP
NN NN NEXTWD of
NN VB PREVWD help
NN JJ WDNEXTTAG right NN
NN NN CURWD president
NN VB PREVBIGRAM TO RB
NN NNP NEXTTAG NNP
NN VBG PREV1OR2WD are
NN NN PREVWD earnings
NN NN SURROUNDTAG NNS ,
NN VB SURROUNDTAG CC DT
NN JJ WDAND2AFT executive of
NN VBG NEXTTAG PRP$
NN JJ WDNEXTTAG official NN
NN NN PREVWD futures
NN VBP PREVWD who
NN VBG PREVTAG VBD
NN RB WDNEXTTAG right RB
NN VBP PREVBIGRAM NNS RB
NN NN PREVBIGRAM MD VB
NN PDT NEXTTAG DT
NN VBG PREV1OR2WD is
NN NNP PREVTAG NNP
NN VB PREVWD n't
NN VBG NEXTTAG DT
NN VBP PREVTAG NNS
NN VBP PREVTAG PRP
NN VB PREV1OR2TAG MD
NN VB PREVTAG TO
JJ VBN WDPREVTAG DT detailed
JJ NN WDPREVTAG JJ program-trading
JJ NN WDNEXTTAG public CC
JJ NN WDNEXTTAG public IN
JJ RB WDNEXTTAG long RB
JJ RB WDAND2TAGAFT much JJ
JJ RB WDNEXTTAG overseas IN
JJ VBN WDAND2TAGBFR NN troubled
JJ NN NEXT2WD assumption
JJ JJ NEXTWD compared
JJ NN NEXTWD has
JJ NN PREVWD expects
JJ RB PREVWD do
JJ VBN NEXTWD up
JJ NNP PREVWD Supreme
JJ RBR NEXT1OR2OR3TAG PRP
JJ DT NEXTBIGRAM IN WP
JJ NN PREVBIGRAM ( DT
JJ NN NEXTBIGRAM , WDT
JJ NNPS SURROUNDTAG DT ,
JJ NN NEXTBIGRAM , VBD
JJ VBP PREVBIGRAM NNS RB
JJ NN SURROUNDTAG JJ :
JJ RBR NEXTTAG VBD
JJ RBR NEXTTAG VBN
JJ NN WDNEXTTAG future IN
JJ JJ PREVTAG PRP$
JJ RB WDNEXTTAG little JJ
JJ RB WDAND2TAGBFR VBD much
JJ JJ WDPREVTAG DT preferred
JJ NN WDNEXTTAG brief VBZ
JJ RB WDNEXTTAG likely MD
JJ NN WDNEXTTAG long-distance NNS
JJ RB WDAND2TAGAFT daily STAART
JJ RB WDPREVTAG NN first
JJ NN WDNEXTTAG chief NNS
JJ NN WDAND2TAGBFR TO third-quarter
JJ VB PREV2WD does
JJ NN WDAND2AFT black white
JJ JJ NEXTWD shares
JJ JJ CURWD Toronto-based
JJ NN PREVWD attorney
JJ JJ NEXT2WD Mortgage
JJ VBN NEXTTAG TO
JJ JJ WDPREVTAG DT first
JJ NN SURROUNDTAG DT RB
JJ NN SURROUNDTAG JJ TO
JJ NN SURROUNDTAG NNP .
JJ VBN SURROUNDTAG NNS IN
JJ VBN NEXT2TAG PRP$
JJ JJ WDNEXTTAG independent IN
JJ RB WDNEXTTAG late .
JJ RB WDNEXTTAG hard IN
JJ NN WDAND2AFT average the
JJ VBN CURWD preferred
JJ NN SURROUNDTAG POS .
JJ NN PREVBIGRAM POS NNP
JJ JJ WDPREVTAG STAART Other
JJ RB WDNEXTTAG overseas ,
JJ JJ WDPREVTAG DT poor
JJ PDT SURROUNDTAG VB DT
JJ VBD NEXTTAG DT
JJ NN NEXTBIGRAM CC NN
JJ RB WDNEXTTAG further IN
JJ NN WDAND2BFR the average
JJ RB LBIGRAM very much
JJ VBN PREVTAG VBZ
JJ VBP PREV1OR2WD they
JJ JJ NEXTBIGRAM , JJ
JJ NN SURROUNDTAG CC VBG
JJ RB WDAND2AFT further STAART
JJ NN SURROUNDTAG NNP ,
JJ VBN NEXTWD by
JJ RB WDAND2TAGAFT overseas STAART
JJ JJ SURROUNDTAG TO NNS
JJ IN SURROUNDTAG NN NNP
JJ NNPS NEXTTAG VBP
JJ VBG NEXT1OR2TAG DT
JJ VBN NEXT1OR2WD with
JJ JJ CURWD short-term
JJ NN NEXTWD is
JJ RBR NEXTTAG ,
JJ JJ WDPREVTAG DT third
JJ JJ PREVWD New
JJ RB SURROUNDTAG MD VB
JJ NN SURROUNDTAG JJ ,
JJ IN WDPREVTAG NNS next
JJ NN WDPREVTAG NN chief
JJ VB PREVBIGRAM MD RB
JJ RB WDNEXTTAG early DT
JJ NN SURROUNDTAG DT TO
JJ NN NEXTBIGRAM MD VB
JJ RB WDNEXTTAG late IN
JJ VB NEXTTAG DT
JJ JJ CURWD many
JJ NN NEXTWD 's
JJ JJ WDPREVTAG DT first
JJ NN SURROUNDTAG IN .
JJ NN SURROUNDTAG DT IN
JJ RB NEXTTAG VBD
JJ RB WDNEXTTAG early IN
JJ NN SURROUNDTAG JJ IN
JJ RB WDNEXTTAG long IN
JJ NN SURROUNDTAG JJ .
JJ NNP NEXT1OR2OR3TAG NNPS
JJ RB NEXTTAG VBN
JJ NN SURROUNDTAG DT ,
JJ NN SURROUNDTAG DT .
JJ VB PREVTAG MD
JJ NN NEXTTAG VBD
JJ RB WDNEXTTAG much JJR
JJ VB PREVTAG TO
JJ NNP NEXTTAG NNP
JJ NN NEXTWD of
RB RBR RBIGRAM later than
RB IN NEXTBIGRAM TO CD
RB RP WDAND2TAGBFR RB up
RB JJ WDPREVTAG IN prior
RB IN WDNEXTTAG So PRP
RB IN WDAND2TAGAFT so MD
RB RB WDPREVTAG VB back
RB IN WDNEXTTAG down JJR
RB RP PREVWD opening
RB IN PREVWD clean
RB IN SURROUNDTAG VBN NNS
RB IN RBIGRAM up slightly
RB IN WDAND2BFR year down
RB IN SURROUNDTAG NN TO
RB IN PREVWD prices
RB RB CURWD aside
RB IN WDNEXTTAG So DT
RB IN RBIGRAM so that
RB IN WDAND2AFT up sale
RB CC WDNEXTTAG Yet PRP
RB RP WDNEXTTAG up VBG
RB RP NEXTBIGRAM NN NNS
RB RP WDPREVTAG PRP up
RB JJ WDNEXTTAG enough NNS
RB RB CURWD away
RB RP NEXTTAG PRP$
RB IN LBIGRAM closed down
RB RP RBIGRAM up for
RB JJ SURROUNDTAG DT NNS
RB VB WDPREVTAG TO back
RB RP WDNEXTTAG up NNS
RB NN PREVWD the
RB JJ SURROUNDTAG IN NNS
RB IN WDNEXTTAG so DT
RB IN WDNEXTTAG so PRP
RB RP WDPREVTAG VBN up
RB JJ WDNEXTTAG enough NN
RB RP WDPREVTAG VBG up
RB RP WDAND2TAGBFR TO up
RB IN WDNEXTTAG up TO
RB JJ SURROUNDTAG DT NN
RB RP NEXTTAG DT
VBN JJ WDNEXTTAG damaged NNS
VBN JJ WDPREVTAG DT required
VBN JJ WDNEXTTAG enhanced NN
VBN VBD WDPREVTAG CC sought
VBN VBN WDAND2TAGAFT increased IN
VBN VBN NEXTWD rates
VBN VB PREV2WD does
VBN JJ CURWD justified
VBN JJ PREVWD this
VBN VBD PREVWD CDs
VBN JJ NEXTWD premium
VBN VB PREVBIGRAM MD RB
VBN VBN WDNEXTTAG considered JJ
VBN VBD SURROUNDTAG , JJ
VBN VBD SURROUNDTAG NN RP
VBN VBD SURROUNDTAG NN ,
VBN VBD SURROUNDTAG NNS PRP
VBN VBD PREVBIGRAM NNP JJ
VBN VBD SURROUNDTAG NNS VBG
VBN VBD SURROUNDTAG NNS CD
VBN VBN WDAND2TAGAFT called ,
VBN VBD SURROUNDTAG NN NNS
VBN VBD WDPREVTAG NN increased
VBN VBD WDPREVTAG CC sold
VBN VBN WDNEXTTAG based IN
VBN JJ WDNEXTTAG alleged JJ
VBN JJ WDAND2TAGBFR VBD changed
VBN JJ NEXTWD equipment
VBN VBD PREVBIGRAM POS NN
VBN VBD SURROUNDTAG , CD
VBN VBD SURROUNDTAG NN $
VBN VBD SURROUNDTAG NNS JJR
VBN VBD SURROUNDTAG NN VBG
VBN JJ NEXTWD losses
VBN VBD WDPREVTAG NN traded
VBN VBD WDPREVTAG NNS estimated
VBN VBD SURROUNDTAG NNS $
VBN JJ PREVTAG JJR
VBN VBD SURROUNDTAG CC PRP
VBN VBD SURROUNDTAG , RB
VBN VBD NEXTWD him
VBN VBN PREVBIGRAM VBD RB
VBN VBN NEXTWD by
VBN VBD PREVBIGRAM NN RB
VBN VBD PREVBIGRAM , CC
VBN VBD SURROUNDTAG NN NNP
VBN NN NEXTWD of
VBN VBN SURROUNDTAG VB DT
VBN VBD SURROUNDTAG CC PRP$
VBN VBD SURROUNDTAG NN CD
VBN VBD PREVTAG PRP
VBN VBD SURROUNDTAG , PRP$
VBN VBD PREVTAG NNPS
VBN VBD SURROUNDTAG , NNP
VBN VBD SURROUNDTAG NNS NNP
VBN VBD SURROUNDTAG NN PRP
VBN VBD SURROUNDTAG NN PRP$
VBN VBD SURROUNDTAG NNS NN
VBN VBD SURROUNDTAG NNS JJ
VBN VBD SURROUNDTAG NNS PRP$
VBN VB PREVTAG MD
VBN VBD SURROUNDTAG NN NN
VBN VBD WDNEXTTAG increased CD
VBN VBD SURROUNDTAG NN JJ
VBN VB PREVTAG TO
VBN VBD PREVBIGRAM PRP RB
VBN VBD SURROUNDTAG NNS NNS
VBN VBD PREVBIGRAM NNP RB
VBN VBD PREVTAG WP
VBN VBD PREVWD which
VBN VBD PREVWD that
VBN VBN SURROUNDTAG VBD DT
VBN VBN PREV1OR2OR3TAG VBP
VBN VBN PREV1OR2TAG VBZ
VBN VBD NEXTTAG DT
VBN VBD PREVTAG PRP
VBN VBD PREVTAG NNP
VBD VBN RBIGRAM included in
VBD VBN WDAND2AFT continued in
VBD VBN WDAND2TAGBFR NN approved
VBD VBN WDNEXTTAG failed NNS
VBD NN WDPREVTAG JJ thought
VBD VBN PREVWD money
VBD VBD NEXTWD been
VBD VBD SURROUNDTAG WDT NNP
VBD JJ SURROUNDTAG JJ NN
VBD VBD WDAND2TAGAFT said NN
VBD VBN PREVTAG JJS
VBD VBN WDPREVTAG NNS bought
VBD VBN WDPREVTAG IN lost
VBD VBN WDNEXTTAG left IN
VBD VBN SURROUNDTAG VB IN
VBD VBN PREVBIGRAM VBN CC
VBD VBN PREVWD as
VBD JJ PREVTAG PRP$
VBD VBN PREV2WD n't
VBD NN PREVWD the
VBD JJ SURROUNDTAG IN NN
VBD NN WDPREVTAG JJ hit
VBD VBN RBIGRAM reported ,
VBD VBN WDNEXTTAG signed IN
VBD VBD RBIGRAM had a
VBD VBN PREV1OR2WD been
VBD VB PREV1OR2TAG MD
VBD VB PREVWD to
VBD VBN PREVBIGRAM DT RB
VBD VBN PREVBIGRAM VBD RB
VBD VBN PREVBIGRAM IN DT
VBD VBD PREVTAG PRP
VBD VBN PREVTAG VBG
VBD VBN WDNEXTTAG ended NNP
VBD VBN SURROUNDTAG DT NN
VBD VBN PREV1OR2WD had
VBD VBN NEXTWD by
VBD VBN PREV1OR2WD be
VBD VBN PREV1OR2TAG VBP
VBD VBN PREVTAG VBD
VBD VBN PREV1OR2TAG VBZ
VBG NN PREV1OR2WD futures
VBG JJ WDAND2TAGAFT following :
VBG NN WDPREVTAG DT buying
VBG NN NEXTWD point
VBG VBG CURWD managing
VBG VBG PREVWD reported
VBG VBG CURWD growing
VBG NN PREVBIGRAM VBG DT
VBG NN NEXTBIGRAM VBZ RB
VBG NN RBIGRAM purchasing managers
VBG NN WDAND2AFT selling the
VBG JJ NEXT2WD among
VBG NN NEXT2WD flow
VBG NN PREVBIGRAM NNP POS
VBG NNP PREV1OR2OR3TAG NNP
VBG VBG PREVBIGRAM DT NN
VBG NN SURROUNDTAG NN CC
VBG NN SURROUNDTAG NN ,
VBG NN WDNEXTTAG buying VBD
VBG NN WDPREVTAG DT beginning
VBG VBG WDNEXTTAG holding NN
VBG NN SURROUNDTAG NN .
VBG NN WDNEXTTAG operating NNS
VBG NN SURROUNDTAG DT ,
VBG NN RBIGRAM operating profit
VBG VBG NEXT1OR2WD officer
VBG NN WDPREVTAG DT selling
VBG NN NEXTWD of
VBG NN PREVTAG JJ
VBZ NNS WDPREVTAG DT offers
VBZ NNS PREVWD housing
VBZ NNS PREVWD any
VBZ NNS PREVWD of
VBZ NN PREVWD a
VBZ VBZ PREV1OR2TAG PRP
VBZ NNS WDNEXTTAG shows ,
VBZ NNS SURROUNDTAG POS IN
VBZ VBZ CURWD is
VBZ NNS NEXTWD were
VBZ VBZ SURROUNDTAG NNP .
VBZ NNS SURROUNDTAG JJ IN
VBZ NNS SURROUNDTAG JJ ,
VBZ NNS PREVTAG PRP$
VBZ VBZ CURWD is
VBZ NNS PREVWD the
VBZ NNS LBIGRAM phone calls
VBZ NNS NEXTTAG VBP
VBZ NNS NEXT2TAG STAART
VBZ NNS NEXTWD of
CC NN PREVWD a
CC RB NEXT1OR2TAG STAART
CC DT PREV1OR2TAG IN
POS PRP PREVBIGRAM STAART VB
POS '' PREV2WD `
POS NNP PREVWD A
POS '' PREVTAG ,
POS '' PREVTAG NN
POS VBZ PREVTAG EX
POS '' NEXT1OR2WD STAART
POS VBZ PREVTAG DT
POS VBZ PREVTAG WP
POS VBZ PREVWD that
POS VBZ NEXTTAG DT
POS VBZ PREV1OR2TAG PRP
VB VBP WDPREVTAG NN appear
VB JJ PREVWD people
VB JJ WDPREVTAG IN close
VB JJ SURROUNDTAG DT JJ
VB VB PREVBIGRAM VB POS
VB JJ NEXTBIGRAM VB IN
VB VBP PREVBIGRAM CD ,
VB VBP PREVBIGRAM NNP RB
VB VBP PREVWD }
VB NN WDPREVTAG NNS cut
VB VBP PREVWD Some
VB VBD WDPREVTAG CC put
VB NN NEXTWD of
VB VB PREVBIGRAM VB NNS
VB VBP PREVBIGRAM POS NNS
VB VBP SURROUNDTAG NNP TO
VB NN PREVTAG JJR
VB VB PREVWD than
VB VBN PREV1OR2WD been
VB NN WDPREVTAG VBD comment
VB VBP PREVBIGRAM CC NNP
VB JJ WDNEXTTAG close NN
VB VBP PREVWD all
VB VBP PREVBIGRAM WP RB
VB NNP PREV1OR2TAG NNP
VB JJ PREVWD is
VB NN PREVBIGRAM VB DT
VB VBP SURROUNDTAG , DT
VB NN PREVTAG VBG
VB VBD WDPREVTAG NN put
VB VBP SURROUNDTAG NN DT
VB VBN NEXTWD by
VB VBP PREVTAG NNPS
VB JJ SURROUNDTAG DT NN
VB VBD PREVTAG NNP
VB VB CURWD be
VB VBP PREVBIGRAM DT NNS
VB VBP PREVBIGRAM PRP RB
VB VBN PREVTAG VBD
VB VB PREVBIGRAM VB PRP
VB VBN PREV1OR2WD be
VB NN PREVTAG PRP$
VB VBP PREVTAG WDT
VB VBN PREVTAG VBP
VB RB NEXTTAG TO
VB VB PREV1OR2OR3TAG MD
VB VBP PREVBIGRAM NNS RB
VB NN PREV1OR2TAG POS
VB NN PREVTAG JJ
VB VBP PREVWD who
VB NN PREVTAG NN
VB VBN PREV1OR2WD has
VB VBP PREVWD that
VB NN PREVTAG IN
VB VBP PREVTAG PRP
VB NN PREV1OR2TAG DT
VB VBP PREVTAG NNS
IN RB WDAND2AFT about million
IN RB WDAND2BFR compared about
IN RB LBIGRAM own about
IN FW WDAND2TAGAFT vs. NN
IN RB WDNEXTTAG before ,
IN RB WDPREVTAG VBG along
IN RP NEXTWD ?
IN RP WDNEXTTAG out NNP
IN IN PREV1OR2WD added
IN RP PREVWD turn
IN IN SURROUNDTAG IN PRP
IN IN SURROUNDTAG IN DT
IN IN NEXTBIGRAM RB DT
IN RB SURROUNDTAG CC $
IN WDT NEXTBIGRAM NNS JJ
IN RB SURROUNDTAG RB ,
IN RB RBIGRAM over and
IN RB RBIGRAM out at
IN VBP WDPREVTAG PRP like
IN RB WDAND2TAGAFT as ''
IN JJ WDNEXTTAG outside NN
IN RP LBIGRAM time around
IN RB SURROUNDTAG , .
IN IN SURROUNDTAG NN IN
IN RP WDNEXTTAG out NNS
IN IN WDPREVTAG JJ as
IN DT SURROUNDTAG CC MD
IN RP RBIGRAM out that
IN RB WDNEXTTAG below VBP
IN RP WDNEXTTAG out PRP$
IN VB PREVWD n't
IN DT PREVWD do
IN RB SURROUNDTAG VB ,
IN DT PREVWD to
IN DT SURROUNDTAG : VBZ
IN IN NEXTBIGRAM RB ,
IN DT SURROUNDTAG CC VBD
IN JJ WDNEXTTAG outside NNS
IN RB WDAND2AFT As as
IN RB WDNEXTTAG before .
IN RP WDNEXTTAG out .
IN JJ PREVWD the
IN NN WDPREVTAG DT while
IN WDT NEXTBIGRAM RB VBZ
IN DT SURROUNDTAG CC VBZ
IN WDT SURROUNDTAG NNS NN
IN JJ SURROUNDTAG DT NN
IN RB WDNEXTTAG as RB
IN WDT SURROUNDTAG NN POS
IN RB SURROUNDTAG , ,
IN WDT SURROUNDTAG NNS RB
IN VB PREVTAG MD
IN DT NEXT1OR2OR3TAG STAART
IN IN PREVWD out
IN DT PREVTAG IN
IN RP WDNEXTTAG out DT
IN IN NEXTBIGRAM NN NNS
IN DT NEXTTAG POS
IN WDT NEXTTAG VB
IN WDT NEXTTAG VBN
IN WDT NEXTTAG VBP
IN WDT NEXTTAG VBD
IN DT NEXTTAG NN
IN WDT NEXTTAG MD
IN WDT NEXTTAG VBZ
IN RB WDAND2AFT as as
DT PDT NEXTWD this
DT DT PREV1OR2OR3TAG TO
DT RB WDAND2AFT no than
DT DT NEXTBIGRAM RBR JJ
DT UH NEXTTAG .
DT NNP LBIGRAM Class A
DT SYM NEXTTAG :
DT NNP NEXTTAG POS
DT PDT WDNEXTTAG all DT
DT RB NEXTTAG RBR
PRP NN PREVTAG (
JJR RB WDAND2TAGBFR VBN better
JJR RBR NEXT1OR2WD like
JJR RBR PREV1OR2WD drifted
JJR RBR PREVWD care
JJR RBR PREVWD down
JJR RBR NEXT2WD offset
JJR RBR NEXTBIGRAM IN RB
JJR JJR PREVBIGRAM NN IN
JJR RBR SURROUNDTAG NN .
JJR RBR SURROUNDTAG NNS CC
JJR RBR NEXT1OR2TAG ``
JJR JJR CURWD stronger
JJR RBR NEXT1OR2WD double
JJR RBR CURWD harder
JJR RBR NEXTWD on
JJR RBR RBIGRAM lower ,
JJR VB NEXTTAG DT
JJR CC NEXT1OR2WD fees
JJR RBR NEXTBIGRAM IN VBD
JJR JJR CURWD lower
JJR JJR CURWD higher
JJR RBR NEXTTAG VBN
JJR RBR NEXTTAG RB
JJR RBR NEXTTAG JJ
VBP VB PREV2WD Do
VBP NN WDAND2BFR STAART wonder
VBP NN PREVTAG POS
VBP NN WDPREVTAG JJ hope
VBP MD NEXTBIGRAM RB VB
VBP VB WDPREVTAG CC say
VBP VB SURROUNDTAG , ,
VBP VB PREV1OR2WD did
VBP NN WDNEXTTAG need IN
VBP VB PREV1OR2WD does
VBP NN PREV1OR2WD a
VBP VB PREV1OR2WD not
VBP NN PREVWD the
VBP VB PREV1OR2WD n't
VBP VB PREVTAG TO
VBP VB PREV1OR2OR3TAG MD
NNPS NNP WDPREVTAG CC Associates
NNPS NNP WDNEXTTAG Citizens IN
NNPS NNP RBIGRAM Industries PLC
NNPS NNP WDAND2BFR at Brothers
NNPS NNP WDNEXTTAG Sports NNP
NNPS NNP PREV1OR2WD Northwest
NNPS NNP CURWD Travelers
NNPS NNP PREVWD Legal
NNPS NNP NEXTWD Association
NNPS NNS NEXTBIGRAM NNP NNS
NNPS NNP RBIGRAM Securities Corp.
NNPS NNPS WDAND2TAGBFR STAART Democrats
NNPS NNPS WDAND2TAGBFR STAART Americans
NNPS NNP NEXT2WD of
NNPS NNP PREV1OR2WD Singapore
NNPS NNP LBIGRAM American Stores
NNPS NNPS NEXTTAG NNP
NNPS NNS PREVTAG STAART
JJS RBS NEXTTAG VBN
JJS JJS SURROUNDTAG IN JJ
JJS RBS WDNEXTTAG most RB
JJS RBS WDNEXTTAG most JJ
RBR RB NEXTBIGRAM , VBG
RBR JJR NEXT1OR2TAG CD
RBR JJR NEXTTAG NN
RBR RB PREVWD no
RBR JJR WDPREVTAG DT earlier
RBR JJR NEXT1OR2TAG NNS
MD NNP NEXT1OR2TAG ,
MD NNP PREVTAG NNP
MD NN PREVWD good
PRP$ PRP WDNEXTTAG her .
PRP$ PRP NEXTTAG IN
PRP$ PRP NEXTTAG TO
RP IN NEXTBIGRAM DT NNP
RP RP PREV1OR2WD cut
RP JJ LBIGRAM was off
RP RP PREVBIGRAM TO VB
RP IN NEXT1OR2TAG NN
RP IN PREV1OR2OR3TAG ,
EX EX RBIGRAM there were
EX RB PREVTAG NNS
EX RB NEXT1OR2TAG IN
EX RB NEXTWD ,
EX RB NEXT1OR2TAG .
