# Supplementary material for: ScholarLens: extracting competences from research publications for the automatic generation of semantic user profiles
Source: PeerJ journal article supplement (doi:10.7717/peerj-cs.121), 2017-07-03
Supplement: Pipeline.zip [file Pipeline.zip › Pipeline/gate/plugins/ANNIE/resources/othomatcher/acelists.def]

cdg.lst:cdg
spur_match.lst:spur_match
prepos.lst:prepos
def_art.lst:def_art
connnector.lst:connnector
alias_ace.lst:alias
nickname.txt:nickname
