# Supplementary material for: ScholarLens: extracting competences from research publications for the automatic generation of semantic user profiles
Source: PeerJ journal article supplement (doi:10.7717/peerj-cs.121), 2017-07-03
Supplement: Pipeline.zip [file Pipeline.zip › Pipeline/gate/plugins/ANNIE/resources/othomatcher/alias.lst]

National Aeronautics and Space Administration£1
NASA£1
New York Stock Exchange£2
Big Board£2
Aluminum Co.£3
Aluminum Co£3
Alcoa£3
New York Times Inc.£4
Times£4
New York Times£4
Coca-Cola Co.£5
Coca-Cola Co£5
Coca-Cola£5
Coke£5
IBM£6
Big Blue£6
New York£7
Big Apple£7
Securities and Exchange Commission£8
SEC£8
