# Supplementary material for: ScholarLens: extracting competences from research publications for the automatic generation of semantic user profiles
Source: PeerJ journal article supplement (doi:10.7717/peerj-cs.121), 2017-07-03
Supplement: Pipeline.zip [file Pipeline.zip › Pipeline/gate/plugins/ANNIE/resources/othomatcher/alias_ace.lst]

Afghan£1
Afghane£1
Afghanistan£1
Afghano£1
Africain£2
Africaine£2
African£2
Africo£2
Afrique£2
Albanais£3
Albanaise£3
Albania£3
Albanian£3
Albanie£3
Albano£3
Algérie£4
Algérien£4
Algérienne£4
Algéro£4
Algeria£4
Algerian£4
Algerien£4
Algerienne£4
Algero£4
Allemagne£5
Allemand£5
Allemande£5
United States£6
États-Unis£6
United States of America£6
Amérique£6
Amériques£6
America£6
Americain£6
Americaine£6
American£6
Americano£6
U S£6
U.S.£6
US£6
U S A£6
U.S.A.£6
USA£6
American Samoa£7
American Samoan£7
Andorra£8
Andorran£8
Andorrane£8
Andorre£8
Andorro£8
Anglais£9
Anglaise£9
Anglaises£9
Angleterre£9
Anglo£9
Angola£10
Angolais£10
Angolaise£10
Angolan£10
Angolo£10
Anguilla£11
Anguillan£11
Antigua and Barbuda£12
Antigua et Barbuda£12
Antiguan£12
Antillais£13
Antillaise£13
Antilles£13
Antilles Néerlandaises£13
Antillo£13
Argentin£14
Argentina£14
Argentine£14
Argentinian£14
Argentino£14
Aruba£15
Aruban£15
Australia£16
Australian£16
Australie£16
Australien£16
Australienne£16
Australo£16
Austria£17
Austrian£17
Austro£17
Autriche£17
Autrichien£17
Autrichienne£17
Azerbadjan£199
Azerbaijani£199
Bahamas£18
Bahamian£18
Bahrain£200
Bahraini£200
Bahreïn£200
Barbadian£19
Barbados£19
Belge£20
Belges£20
Belgian£20
Belgique£20
Belgium£20
Belgo£20
Belize£21
Belizean£21
Benin£22
Bénin£22
Beninese£22
Bermuda£23
Bermudeen£23
Bermudeenne£23
Bermudes£23
Bermudian£23
Bhoutan£24
Bhutan£24
Bhutanese£24
Belarus£25
Bélarus£25
Bielorusse£25
Bielorussie£24
Birman£25
Birmane£25
Birmanes£25
Birmanie£25
Birmano£25
Bolivia£26
Bolivian£26
Bolivie£26
Bolivien£26
Bolivienne£26
Bolivo£26
Bosnia£27
Bosnia-Herzegovina£27
Bosnian£27
Bosnie£27
Botswana£28
Botswanais£28
Botswanaise£28
Botswano£28
Brésil£29
Brésilien£29
Brésilienne£29
Brésilo£29
Brazil£29
Brazilian£29
Bresilien£29
Bresilienne£29
Bresilo£29
Great Britain£30
Britain£30
Britannique£30
Britanno£30
British£30
U K£30
U.K.£30
UK£30
United Kingdom£30
Brunei£31
Bruneian£31
Bulgare£32
Bulgares£32
Bulgaria£32
Bulgarian£32
Bulgarie£32
Bulgaro£32
Burkina£33
Burkinabe£33
Burkina Faso£33
Burma£34
Burmese£34
Burundais£35
Burundaise£35
Burundi£35
Burundo£35
Cambodge£36
Cambodgien£36
Cambodgienne£36
Cambodia£36
Cambodian£36
Cameroon£37
Cameroonian£37
Cameroun£37
Camerounais£37
Camerounaise£37
Canada£38
Canadian£38
Canadien£38
Canadienne£38
Canado£38
Cape Verde£39
Cape Verdean£39
CapVert£39
Centrafricain£40
Centrafricaine£40
Central African£40
Central African Republic£40
Chad£41
Chadian£41
Tchad£41
Tchadien£41
Tchadienne£41
Chile£42
Chilean£42
Chili£42
Chilien£42
Chilienne£42
People's Republic of China£43
Republic of China£43
China£43
Chine£43
Chinese£43
Chinois£43
Chinoise£43
Chypre£44
Chypriote£44
Cisjordanien£45
Cisjordanienne£45
Cisjordano£45
Colombia£46
Colombian£46
Colombie£46
Colombien£46
Colombienne£46
Comoréen£47
Comoréenne£47
Comoran£47
Comoreen£47
Comoreenne£47
Comores£47
Comoros£47
Congo£48
Congolais£48
Congolaise£48
Congolese£48
Democratic People's Republic of Korea£49
Corée£49
Coréen£49
Coréenne£49
Coreen£49
Coreenne£49
Costa Rica£50
Costa Rican£50
Croate£51
Croates£51
Croatia£51
Croatie£51
Cuba£52
Cubain£52
Cubaine£52
Cuban£52
Cypriot£53
Cyprus£53
République Tchèque£54
Chechnya£54
the Czech Republic£54
Tchècoslovaquie£54
Tchèque£54
Tcheco£54
Tchecoslovaque£54
Tcheque£54
Czech£54
Czechoslovak£54
Czechoslovakia£54
Czechoslovakian£54
Czech Republic£54
Danemark£55
Danish£55
Danois£55
Danoise£55
Denmark£55
Djibouti£56
Djiboutian£56
Dominica£57
Dominicain£57
Dominicaine£57
Dominican£57
Dominican Republic£57
Dominique£57
East German£58
East Germany£58
Équateur£59
Ecuador£59
Ecuadoran£59
Ecuadorian£59
Égypte£60
Egypt£60
Egyptian£60
Egyptien£60
Egyptienne£60
Egypto£60
Emirates£61
Emirats Arabes£61
United Arab Emirates£61
Emirian£61
English£198
England£198
Equatorial Guinea£62
Equatorial Guinean£62
Estonia£63
Estonian£63
Estonie£63
Estonien£63
Estonienne£63
Éthiopie£64
Ethiopia£64
Ethiopian£64
Ethiopien£64
Ethiopienne£64
Île Europa£202
Europeano£202
Europeen£202
Europeenne£202
Îles Féroé£201
Faroese£201
Fidji£65
Fiji£65
Fijian£65
Finland£66
Finlandais£66
Finlandaise£66
Finlandaises£66
Finlande£66
Finlando£66
Finnish£66
Finois£66
Finoise£66
Finoises£66
Français£67
Française£67
Françaises£67
Francais£67
Francaise£67
Francaises£67
France£67
Franco£67
French£67
French Polynesia£68
French Polynesian£68
Gabon£69
Gabonese£69
Gabonnais£69
Gabonnaise£69
Gabonnaises£69
Gambia£70
Gambian£70
Gambie£70
Gambien£70
Gambienne£70
Géorgie£71
Georgian£71
German£72
German Democratic Republic£72
Germano£72
Germany£72
Ghana£73
Ghanéen£73
Ghanéenne£73
Ghanaian£73
Ghaneen£73
Ghaneenne£73
Grèce£74
Grec£74
Greco£74
Grecque£74
Grecques£74
Grecs£74
Greece£74
Greenland£75
Greenlander£75
Greenlandic£75
Grenada£76
Grenade£76
Grenadian£76
Guadelopeen£77
Guadelopeenne£77
Guadeloupe£77
Guam£78
Guamanian£78
Guatemala£79
Guatemalan£79
Guatemalteque£79
Guinée£80
Guinea£80
Guinean£80
Guineen£80
Guineenne£80
Guinée-Bissau£81
Guinea Bissauan£81
Guyana£82
Guyanais£82
Guyanaise£82
Guyane£82
Guyanese£82
Haïti£83
Haiti£83
Haitian£83
Haitien£83
Haitienne£83
Helvético£84
Helvétique£84
Helvetico£84
Helvetique£84
Dutch£85
Holland£85
Hollandais£85
Hollandaise£85
Netherlands£85
the Netherlands£85
The Netherlands£85
Hongrie£86
Hongro£86
Hongrois£86
Hongroise£86
Hungary£86
Iceland£87
Icelandic£87
Inde£88
India£88
Indian£88
Indien£88
Indienne£88
Indiennes£88
Indiens£88
Indo£89
Indonésie£89
Indonesia£89
Indonesian£89
Indonesien£89
Indonesienne£89
Indonesio£89
Irak£90
Irakien£90
Irakienne£90
Irako£90
Iraq£90
Iraqi£90
Iraqien£90
Iraqienne£90
Iraqo£90
Iraq - Saudia Arabia Neutral Zone£90
Iran£91
Iranian£91
Iranien£91
Iranienne£91
Irano£91
Ireland£92
Irish£92
Irish Republic£92
Irlandais£92
Irlandaise£92
Irlande£92
Irlando£92
Islandais£93
Islandaise£93
Islande£93
Islando£93
Israël£94
Israel£94
Israeli£94
Israelien£94
Israelienne£94
Israelo£94
Italian£95
Italie£95
Italien£95
Italienne£95
Italo£95
Italy£95
Ivoirien£96
Ivoirienne£96
Ivorian£96
Ivory Coast£96
Jamaïque£97
Jamaica£97
Jamaicain£97
Jamaicainne£97
Jamaican£97
Jamaico£97
Japan£98
Japanese£98
Japon£98
Japonais£98
Japonaise£98
Japono£98
Jordan£99
Jordanian£99
Jordanie£99
Jordanien£99
Jordanienne£99
Jordano£99
Kazakhie£100
Kazakhstan£100
Kenya£101
Kenyan£101
Kenyane£101
Kirghizie£102
Kirghizistan£102
Korea£103
Korean£103
Koweït£104
Koweitien£104
Koweitienne£104
Koweito£104
Kuwait£104
Kuwaiti£104
Laos£105
Laotian£105
Latvia£106
Latvian£106
Lebanese£203
Lebanon£203
Letton£107
Lettonie£107
Lettonne£107
Liban£108
Libanais£108
Libanaise£108
Libano£108
Libéria£109
Liberia£109
Liberian£109
Liberien£109
Liberienne£109
Libya£110
Libyan£110
Libye£110
Lithuania£111
Lithuanian£111
Lithuanie£111
Lithuanien£111
Lithuanienne£111
Lituanie£111
Luxembourg£112
Luxembourgeois£112
Luxembourgeoise£112
Malaisie£113
Malaisien£113
Malaisienne£113
Malaysia£113
Malaysian£113
Malawi£114
Malawian£114
Maldive£115
Maldives£115
Maldivian£115
Malgache£116
Malgaches£116
Mali£117
Malian£117
Malien£117
Malienne£117
Malta£118
Maltais£118
Maltaise£118
Malte£118
Maltese£118
Maroc£119
Marocain£119
Marocaine£119
Martiniquais£120
Martiniquaise£120
Martinique£120
Maurétanie£121
Mauritania£121
Mauritanian£121
Mauritanie£121
Mauritanien£121
Mauritanienne£121
Mauritian£121
Mauritius£121
Mexicain£122
Mexicaine£122
Mexican£122
Mexico£122
Mexique£122
Micronésie£123
Micronesian£123
Monacan£124
Monaco£124
Mongolia£125
Mongolian£125
Mongolie£125
Mongolien£125
Mongolienne£125
Montserrat£126
Montserratian£126
Moroccan£127
Morocco£127
Mozambican£128
Mozambique£128
Namibia£129
Namibian£129
Namibie£129
Namibien£129
Namibienne£129
Nauru£130
Nauruan£130
Népal£131
Nepal£131
Nepalais£131
Nepalaise£131
Nepalese£131
New Caledonia£132
New Caledonian£132
Nicaragua£133
Nicaraguan£133
Nicaraguayen£133
Nicaraguayenne£133
Nigérian£134
Nigériane£134
Niger£134
Nigeria£134
Nigerian£134
Nigeriane£134
Nigerien£134
Nigerienne£134
Nippon£135
Nippone£135
Niue£136
Niuean£136
north Korea£137
North Korea£137
North Korean£137
Norvège£138
Norvegien£138
Norvegienne£138
Norway£139
Norwegian£139
Oman£140
Omani£140
Pakistan£141
Pakistani£141
Palestine£142
Palestinian£142
Panama£143
Panamanian£143
Papoua£144
Papouasie£144
Papua New Guinea£145
Papua New Guinean£145
Pérou£146
Peru£146
Peruvian£146
Peruvien£146
Peruvienne£146
Philippines£204
Philippin£204
Philippine£204
Poland£147
Polish£147
Pologne£147
Porto Rico£148
Puerto Rico£148
Puerto Rican£148
Portugais£149
Portugaise£149
Portugaises£149
Portugal£149
Portuguese£149
Qatar£150
Qatari£150
Québeco£151
Québecois£151
Québecoise£151
Quebeco£151
Quebecois£151
Quebecoise£151
Île de la Réunion£204
Réunionais£204
Réunionaise£204
Réunionese£204
Reunion£204
Reunionais£204
Reunionaise£204
Reunionese£204
Romania£152
Romanian£152
Roumain£152
Roumaine£152
Roumanie£152
Roumano£152
Rouanda£153
Ruanda£153
Rwanda£153
Rwandais£153
Rwandaise£153
Rwandaises£153
Rwandan£153
Russia£154
Russian£154
Russie£154
Russo£154
El Salvador£209
Salvadoran£209
Sénégal£155
Sénégalais£155
Sénégalaise£155
Sénégalese£155
Sénégalo£155
Senegal£155
Senegalais£155
Senegalaise£155
Senegalese£155
Senegalo£155
Sanmarinese£205
San Marino£205
Saoudien£156
Saoudienne£156
Saoudiennes£156
Saudi£156
Saudi Arabia£156
Saudi Arabian£156
Arabie Saoudite£156
Scotch£157
Scots£157
Scottish£157
Ecossais£157
Ecossaise£157
Ecossaises£157
Serb£158
Serbe£158
Serbia£158
Serbian£158
Serbie et Monténégro£158
Serb Republic£158
Sierra Leone£206
Sierra Leonean£206
Singapore£159
Singaporian£159
Singapour£159
Slovak£160
Slovakia£160
Slovakian£160
Slovénie£161
Slovaquie£161
Slovokia£161
Somali£162
Somalia£162
Somalie£162
Somalien£162
Somalienne£162
Lesotho£207
Sotho£207
Soudan£163
Soudanais£163
Soudanaise£163
South Africa£164
South African£164
south Korea£165
South Korea£165
South Korean£165
Soviet£166
Sovietique£166
Sovietiques£166
Sovieto£166
Soviet Union£166
U S S R£166
U.S.S.R.£166
USSR£166
Hispano£167
Espagne£167
Espagnol£167
Espagnole£167
Espagnoles£167
Espagnols£167
Spain£167
Spanish£167
Sri Lanka£168
SriLanka£168
Sri-Lankais£168
Sri-Lankaise£168
Sri Lankan£168
Suède£169
Suèdo£169
Suèdois£169
Suèdoise£169
Sudan£169
Sudanese£169
Suedo£169
Suedois£169
Suedoise£169
Suriname£170
Surinamese£170
Surinam (Guyane£170
Swazi£208
Swaziland£208
Sweden£171
Swedish£171
Suisse£172
Suisses£172
Swiss£172
Switzerland£172
Syria£173
Syrian£173
Syrie£173
Syrien£173
Syrienne£173
Syriens£173
Taïwan£174
Taiwan£174
Taiwanais£174
Taiwanaise£174
Taiwanese£174
Tadjikistan£175
Tajikistani£175
Tanzania£176
Tanzanian£176
Tanzanie£176
Tanzanien£176
Tanzanienne£176
Thaïlande£177
Thai£177
Thailand£177
Thailandais£177
Thailandaise£177

East Timor?
West Timor?
Timorese?

Togo£178
Togolais£178
Togolaise£178
Togolese£178
Tokelau£179
Tokelauan£179
Tonga£180
Tongan£180
Trinidad and Tobago£181
Trinidadian£181
Trinité et Tobago£181
Tunésie£182
Tunisia£182
Tunisian£182
Tunisie£182
Tunisien£182
Tunisienne£182
Tunisio£182
Turc£183
Turco£183
Turkey£183
Turkish£183
Turque£183
Turques£183
Turquie£183
Turkménistan£184
Turkmenistani£184
Tuvalu£185
Tuvaluan£185
Ouganda£186
Uganda£186
Ugandan£186
Ukrain£187
Ukraine£187
Ukrainien£187
Ukrainienne£187
Uruguay£188
Uruguayan£188
Ouzbékistan£211
Uzbek£211
Vénézuelien£189
Vénézuelienne£189
Venezuela£189
Venezuelan£189
Venezuelien£189
Venezuelienne£189
Vanuatu£190
Vanuatuan£190
Viètnam£191
Vietnam£191
Vietnamese£191
Vietnamien£191
Vietnamienne£191
Western Samoa£192
Western Samoan£192
West German£210
West Germany£210
Yémen£193
Yemen£193
Yemeni£193
Yougoslave£194
Yougoslavie£194
Yugoslav£194
Yugoslavia£194
Yugoslavian£194
Yugoslovia£194
Zaïre£195
Zaïrois£195
Zaïroise£195
Zaïroises£195
Zaire£195
Zairian£195
Zairois£195
Zairoise£195
Zambia£196
Zambian£196
Zambie£196
Zambien£196
Zambienne£196
Zimbabwe£197
Zimbabwean£197
