# Supplementary material for: ScholarLens: extracting competences from research publications for the automatic generation of semantic user profiles
Source: PeerJ journal article supplement (doi:10.7717/peerj-cs.121), 2017-07-03
Supplement: Pipeline.zip [file Pipeline.zip › Pipeline/gate/plugins/ANNIE/resources/othomatcher/cdg.lst]

Co
PTE LTD
AMBA
Ltd.
NA.
Co.
CDERL
L. P.
SARL
PLC.
Pty ltd
S. p. A.
Oy
GMBH & COKG
GMBH
Bv
Pte ltd
L. L. C.
G. M. B. H.
NV.
AG &AMP; COKG
LTD.
S. P. A.
KK.
AG & COKG
GMBH.
Cos
PT
Lp
corp
AB
GMBH &AMP; COKG
Associates
BDH
MIJ
SV
G. m. b. H. &AMP; CO , KG
NV
Ag
Group
CO
Brothers
Sons Co
Ay
eGmbh
CPORA
plc
PERSERO
C.V.
Spa
Corp
gGmbH
LDA
BV
SAC
Corp.
SPA
Ltd
Sons
LLC
PTY LTD
S. A. R. L.
N. V.
Corporation
AG & Co KG
HMIG
LTD
B. V.
INC.
KK
Inc
Na
LP
Incorporated
INC
GmbH.
AG
ASSOCIATES
Gmbh
Bhd
PERUM
CV
Kk
AY
C. por A.
BHD
Company
S. A.
AENP
Limited
plc.
COS
HVER
AG &AMP; Co KG
CORP.
G. m. b. H.
BDH.
Bros.
Group.
Plc
G. m. b. H. & CO , KG
Cos.
SA
PLC
NA
N. A.
PERJAN
Inc.
PP
CORP
C. de R. L.
L.P.
Plc.
EGMBH
PN
OYAB
Limitada
SPA.
OY
Ab
AG.
GmbH
AB.
S. A. C.
Nv
SA.
Sa
