# Supplementary material for: ScholarLens: extracting competences from research publications for the automatic generation of semantic user profiles
Source: PeerJ journal article supplement (doi:10.7717/peerj-cs.121), 2017-07-03
Supplement: Pipeline.zip [file Pipeline.zip › Pipeline/gate/plugins/ANNIE/resources/othomatcher/chinese_alias.lst]

国家 出入境 检验 检疫局£1
出入境 检验 检疫局£1
国防 科学 技术 工业 委员会£2
国防 科工委£2
中国人民银行£3
人民 银行£3
人行£3
国家 发展 计划 委员会£4
国家 计委£4
国务院 特区办公室£5
国务院 特区办£5
中国 新华 通讯社£6
新华 通讯社£6
新华社£6
纺织 工业局£7
国家 纺织 工业局£7
国家 环境 保护 总局£8
环保 总局£8
国家 经济 贸易 委员会£9
国家 经贸委£9
经贸委£9
国家 计划 生育 委员会£10
国家 计生委£10
计划生委£10
中国 海关 总署£11
海关 总署£11
中国 工程院£12
工程院£12
中国 科学院£13
中科院£13
科学院£13
国家 外汇 管理局£14
国家 外管局£14
外管局£14
国家 机械 工业局£15
机械 工业局£15
国家 建筑 材料 工业局£16
建材 工业局£16
国家 轻工业局£17
轻工局£17
国家 石油 和 化学 工业局£18
国家 石化局£18
石化局£18
国家 税务 总局£19
税务 总局£19
国家 体育 总局£20
体育 总局£20
国家 体委£20
国家 统计局£21
统计局£21
国家 外国专家局£22
外国专家局£22
国家 文物局£23
文物局£23
国家 新闻出版署£24
新闻出版署£24
国家 药品 监督 管理局£25
国家 药监局£25
药品 监督 管理局£25
药监局£25
国家 烟草 专业局£26
国家 烟草局£26
烟草局£26
国家 冶金 工业局£27
国家 冶金局£27
冶金局£27
国家 邮政局£28
邮政局£28
国家 知识 产权局£29
知识 产权局£29
国家 质量 技术 监督局£30
质量 技术 监督局£30
国家 质监局£30
质监局£30
国家 中医药 管理局£31
中医药 管理局£31
国家 宗教事务局£32
宗教事务局£32
国务院 参事局£33
参事局£33
国务院 新闻办公室£34
新闻办公室£34
劳动 和 社会 保障部£35
劳保部£35
中国 地震局£36
地震局£36
中国 民用 航空 总局£37
民用 航空 总局£37
中国民航总局£37
民航总局£37
中国 气象局£38
气象局£38
中国 银行£39
中行£39
中国 证券 监督 管理 委员会£40
证券 监督 管理 委员会£40
工发 组织£41
联合国 工发 组织£41
联合国 安理会£42
联合国 安全 理事会£42
世界 贸易 组织£43
WTO£43
世贸 组织£43
世界 卫生 组织£44
WHO£44
世卫 组织£44
天主教£45
天主 教会£45
欧盟£46
欧洲联盟£46
共党£47
共产党£47
安徽省£48
安徽£48
皖£48
福建£49
闽£49
福建省£49
甘肃£50
甘£50
陇£50
甘肃省£50
广东£51
粤£51
广东省£51
广西£52
桂£52
广西壮族自治区£52
贵州£53
黔£53
贵£53
贵州省£53
海南£54
琼£54
海南省£54
河北£55
冀£55
河北省£55
河南£56
豫£56
河南省£56
黑龙江£57
黑£57
黑龙江省£57
湖南£58
湘£58
湖南省£58
吉林£59
吉£59
吉林省£59
江苏£60
苏£60
江苏省£60
江西£61
赣£61
江西省£61
辽宁£62
辽£62
辽宁省£62
内蒙£63
内蒙古£63
蒙£63
内蒙古自治区£63
宁夏£64
宁£64
宁夏省£64
青海£65
青£65
青海省£65
山东£66
鲁£66
山东省£66
山西£67
晋£67
山西省£67
陕西£68
陕£68
秦£68
陕西省£68
四川£69
蜀£69
四川省£69
台湾£70
台£70
台湾岛£70
西藏£71
藏£71
西藏自治区£71
新疆£72
新£72
新疆维吾尔自治区£72
浙£73
浙江£73
浙江省£73
云南£74
云南省£74
湖北£75
鄂£75
湖北省£75
澳门£76
澳£76
香港£77
港£77
杭州市£78
杭州£78
杭£78
上海市£79
上海£79
沪£79
北京市£80
北京£80
京£80
天津市£81
天津£81
津£81
南京市£82
南京£82
宁£82
广州市£83
广州£83
穗£83
宁波市£84
宁波£84
甬£84
重庆市£85
重庆£85
渝£85
《华盛顿 邮报》£86
华盛顿 邮报£86
《华尔街 日报》£87
华尔街 日报£87
《纽约 时报》£88
纽约 时报£88
《台北 国际 之声》£89
台北 国际 之声£89
中央 电视台£90
中央 电台£90
CCTV£90
中央台£90
加州£91
加利福尼亚州£91
佛州£92
佛罗里达州£92
麻省£93
马塞诸塞州£93
清华 大学£94
清华£94
北京 大学£95
北大£95
中国 人民 大学£96
人大£96
北京 航空 航天 大学£97
北航£97
中国 政法 大学£98
政法 大学£98
北京 邮电 大学£99
北邮£99
北京 师范 大学£100
北师大£100
北京 理工 大学£101
北理工£101
北京 外国语 大学£102
北外£102
北京 医科 大学£103
北医£103
北京 电影 学院£104
北影£104
中央 戏剧 学院£105
中戏£105
北京 第二 外国语 学院£106
北二外£106
北京 农学院£107
北农£107
中国 协和 医科 大学£108
协和 医科 大学£108
天津 大学£109
天大£109
南开 大学£110
南开£110
吉林 大学£111
吉大£111
南京 大学£112
南大£112
南京 航空 航天 大学£113
南航£113
南京 邮电 大学£114
南邮£114
南京 理工 大学£115
南理工£115
南京 师范 大学£116
南师大£116
南京 农业 大学£117
南农£117
南京 林业 大学£118
南林£118
东南 大学£119
东大£119
中国 科学 技术 大学£120
中科大£120
科大£120
山东 大学£121
山大£121
复旦 大学£122
复旦£122
上海 交通 大学£123
上海 交通 大£123
上海 交大£123
交大£123
华东 师范 大学£124
华师大£124
浙江 大学£125
浙大£125
浙江 师范 大学£126
浙师大£126
厦门 大学£127
厦大£127
四川 大学£128
川大£128
西安 交通 大学£129
西安 交大£129
兰州 大学£130
兰大£130
奥地利£131
奥£131
澳大利亚£132
澳£132
梵蒂冈£133
梵£133
美国£134
美£134
英国£135
英£135
沙地阿拉伯£136
沙特阿拉伯£136
沙特£136
台湾£137
台£137
泰国£138
泰£138
越南£139
越£139
韩国£140
南韩£140
韩£140
葡萄牙£141
葡£141
菲律宾£142
菲£142
荷兰£143
荷£143
日本£144
日£144
意大利£145
意£145
以色列£146
以£146
印度£147
印£147
德国£148
德£148
法国£149
法£149
埃及£150
埃£150
中华人民共和国£151
中国£151
中£151
加拿大£152
加£152
阿第克 公司£153
阿第克£153
ABB 公司£154
ABB£154
埃克森 公司£155
埃克森£155
埃尼尔 公司£156
埃尼尔£156
爱立信 公司£157
爱立信£157
AMP 保险£158
AMP 保险 公司£158
奥卡恩 集团£159
奥卡恩£159
奥卡恩 集团 公司£
ASDA 集团£160
ASDA 集团 公司£160
AXA 公司£161
AXA£161
巴里巴 金融£162
巴里巴 金融 公司£162
巴斯夫 公司£167
巴斯夫£167
巴西 石油£168
巴西 石油 公司£168
百事 公司£169
百事£169
拜耳 公司£170
拜耳£170
宝洁 公司£171
宝洁£171
宝马 汽车 公司£172
宝马£172
波音 公司£173
波音£173
创意 系统£174
创意 系统 公司£174
CGU 公司£175
CGU£175
CNP£176
CNP 公司£176
CNP 保险 公司£176
大荣 公司£177
大荣£177
大通 曼哈顿£178
大通 曼哈顿 公司£178
大众 汽车£179
大众 汽车 公司£179
戴尔 电脑£180
戴尔£180
德国 电讯£181
德国 电讯 公司£181
德国 西门子£182
德国 西门子 公司£182
德国 裕宝£183
德国 裕宝 银行£183
德士古 公司£184
德士古£184
德意志 巴恩£185
德意志 巴恩 公司£185
德意志 合作 银行£186
德意志 银行£186
德意志 邮政£187
德意志 邮政 公司£187
第一 劝业£188
第一 劝业 银行£188
东京 电力£189
东京 电力 公司£189
东京 海事 与 火灾 保险£190
东京 海事 与 火灾 保险 公司£190
东芝 公司£191
东芝£191
杜邦 公司£192
杜邦£192
杜克 能源£193
杜克 能源 公司£193
法国 电力£194
法国 电力 公司£194
法国 电讯£195
法国 电讯 公司£195
法国 兴业£196
法国 兴业 银行£196
法国 邮政£197
法国 邮政 公司£197
法尼梅 公司£198
法尼梅£198
费巴 集团£199
费巴 集团 公司£199
菲利浦 电气 公司£200
飞利浦£200
丰田 汽车£201
丰田 汽车 公司£201
富士通 公司£202
富士通£202
福蒂斯 公司£203
福蒂斯£203
福特 汽车 公司£204
福特£204
关西 电力£205
关西 电力 公司£205
国际 造纸£206
国际 造纸 公司£206
汉莎 航空£207
汉莎£207
汉莎 航空 集团£207
汉莎 航空 集团 公司 £207
花旗 集团£208
花旗£208
花旗 银行£208
惠普 公司£209
惠普£209
佳能 公司£210
佳能£210
卡西诺 集团£211
卡西诺£211
卡西诺 集团 公司£211
卡西斯 百货 集团£212
卡西斯 百货 集团 公司£212
康柏 电脑£213
康柏 电脑 公司£213
壳牌 集团£214
壳牌£214
莱因 集团£215
莱因 集团 公司£215
拉加德里 集团£216
拉加德里 集团 公司£216
劳埃德 TSB 集团£217
劳埃德 TSB 集团 公司£217
雷诺 公司£218
雷诺£218
里昂 信贷£219
里昂 信贷 公司£219
联邦 百货£220
联邦 百货 商店£220
联邦 百货 商店 公司£220
联邦 家庭 信贷 抵押£221
联邦 家庭 信贷 抵押 公司£221
联邦 捷运£222
联邦 捷运 公司£222
联合 保健£223
联合 保健 公司£223
联合 利华£224
联合 利华 公司£224
罗氏 控股£225
罗氏 控股 公司£225
曼内斯曼 公司£226
曼内斯曼£226
MCI 通讯£227
MCI 通讯 公司£227
美孚 石油£228
美孚£228
美国 百货£229
美国 百货 公司£229
美国 英特尔 公司£230
英特尔£230
美洲 银行£231
美洲 银行 公司£231
摩托罗拉 公司£232
摩托罗拉£232
纳比斯科 控股£233
纳比斯科 控股 公司£233
南方 贝尔£234
南方 贝尔 公司£234
诺威治 联合 公司£235
诺威治£235
彭尼 公司£236
彭尼£236
皮诺特－印章 集团£237
皮诺特－印章 集团 公司£237
强生 公司£238
强生£238
雀巢 公司£239
雀巢£239
日本 航空£240
日本 航空 公司£240
日本 通运£241
日本 通运 公司£241
日立 公司£242
日立£242
瑞士 信贷£243
瑞士 信贷 公司£243
三菱 电气£244
三菱£244
三菱 电气 公司£244
三星 电子£245
三星£245
三星 电子 公司£245
三星 集团£245
商用 机器£246
商用 机器 公司£246
上海 施乐宝 制药 有限 公司£247
上海 施乐宝£247
斯卡迪纳 集团£248
斯卡迪纳 集团 公司£248
斯坦德 集团£249
斯坦德 集团 公司£249
石化 公司£250
石化 集团£250
石油 化工 集团£251
石油 化工 集团 公司£251
SNCF 公司£252
SNCF£252
松下 电器£253
松下£253
松下 电器 产业 公司£253
隋福威 公司£254
隋福威£254
索尼 公司£255
索尼£255
特斯科 公司£256
特斯科£256
通用 电气£257
通用 电气 公司£257
微软 公司£258
微软£258
维亚哥 公司£259
维亚哥£259
五月 百货 商店£260
五月 百货 商店 公司£260
西班牙 电讯£261
西班牙 电讯 公司£261
西格纳 公司£262
西格纳£262
西门子 公司£263
西门子£263
夏普 公司£264
夏普£264
意大利 信贷£265
意大利 信贷 公司£265
英 格雷姆麦克罗£266
英 格雷姆麦克罗 公司£266
英 美 烟草£267
英 美 烟草 工业 公司£267
中部 电力£268
中部 电力 公司£268
中国 工商 银行£269
工商 银行£269
工行£269
