# Supplementary material for: ScholarLens: extracting competences from research publications for the automatic generation of semantic user profiles
Source: PeerJ journal article supplement (doi:10.7717/peerj-cs.121), 2017-07-03
Supplement: Pipeline.zip [file Pipeline.zip › Pipeline/gate/plugins/ANNIE/resources/othomatcher/connnector.lst]

of£con
for£con
de£con
di£con
von£con
van£con
&£con
