# Supplementary material for: ScholarLens: extracting competences from research publications for the automatic generation of semantic user profiles
Source: PeerJ journal article supplement (doi:10.7717/peerj-cs.121), 2017-07-03
Supplement: Pipeline.zip [file Pipeline.zip › Pipeline/gate/plugins/ANNIE/resources/othomatcher/nickname.txt]

# MOST COMMON NICKNAMES FOR FIRST NAMES
#
# Derived from data prepared by Deron Meranda <deron.meranda@gmail.com>
# See http://deron.meranda.us/data/nicknames.txt for original version
#
# Meranda's data prepared as follows:
# Based upon 1990 US Census Data and other various sources
# Some data also from http://www.censusdiggins.com/
#
# Subsequently modifed by Andrew Borthwick, and others at Spock Networks, 2007 - 2008 as follows:
#    --Nickname list greatly shortened to make it more practical for use in matching
#    --A few key missing nicknames added
# 
# Column 1: Nickname
# Column 2: Formal name
# Column 3: Substitution likelihood (wild guess based on intuition)
# Column 4: Male variant (M) or female variant (F) (not used in Orthomatcher)
# 
ABBIE ABIGAIL 0.80
ABBY ABIGAIL 0.81
ABE ABRAHAM 0.80
ABE ABRAM 0.60
AL ALBERT 0.60
ALEX ALEXANDER 0.85 M
ALEX ALEXANDRA 0.85 F
ALEXANDER ALEX 0.85
ALEXANDRA ALEX 0.85
ALLISON ALLIE 0.6
ANDI ANDREA 0.7
ANDY ANDREW 0.75
ART ARTHUR 0.90
BARBIE BARBARA 0.75
BARNEY BARNABAS 0.70
BART BARTHOLOMEW 0.85 
BEA BEATRICE 0.70
BELLA ARABELLA 0.60
BELLA ISABELLA 0.60
BEN BENJAMIN 0.70
BENJY BENJAMIN 0.65
BETH ELIZABETH 0.75
BETSY ElIZABETH 0.75
BILL WILLIAM 0.90 
BILLY WILLIAM 0.70
BOB ROBERT 0.90
BRAD BRADFORD 0.70
BRAD BRADLEY 0.70
CANDICE CANDY 0.6
CAROL CAROLANN 0.65
CAROL CAROLINE 0.70
CASSIE CASSANDRA 0.65
CATHY CATHERINE 0.80
CATHY CATHLEEN 0.65
CHARLIE CHARLES 0.85
CHET CHESTER 0.60
CHRIS CHRISTINA 0.80
CHRIS CHRISTINE 0.75
CHRIS CHRISTOPHER 0.85
CINDY CINDERELLA 0.70
CLARA CLARISSA 0.75
CLIFF CLIFFORD 0.80
CORNELIA NELLY 0.6
CURT CURTIS 0.75
CY CYRUS 0.80
DAN DANIEL 0.90
DANNY DANIEL 0.90
DAVE DAVID 0.90
DAVEY DAVID 0.75
DEB DEBORAH 0.80
DEB DEBRA 0.75
DEBBIE DEBORAH 0.80
DEBBIE DEBRA 0.75
DEBBY DEB 0.6
DICK RICHARD 0.75
DON DONALD 0.80
DONNIE DONALD 0.90
DONNY DONALD 0.90
DREW ANDREW 0.80
ED EDWARD 0.85
ED EDWIN 0.85
ELAINE LANIE 0.6
FLO FLORENCE 0.75
FLORA FLORENCE 0.70
FRANCIE FRANCINE 0.65
FRANK FRANKLIN 0.65
FRANKIE FRANCIS 0.60
FRED FREDERICK 0.70
FREDDIE FREDERICK 0.70
GABI GABRIELE 0.80
GABBY GABRIELLA 0.80
GABBY GABRIELLE 0.80
GABE GABRIEL 0.75
GEOFF GEOFFREY 0.80
GEOFF JEFFREY 0.80
GERRIE GERALDINE 0.75
GERRY GERALD 0.60
GERRY GERALDINE 0.70
GERTIE GERTRUDE 0.75
GIL GILBERT 0.75
GREG GREGORY 0.6
GWEN GWENDOLYN 0.90
HERB HERBERT 0.75
JACK JACKSON 0.6
JAMIE JAMES 0.60
JEB JEBADIAH 0.65
JEFF GEOFFREY 0.60
JEFF JEFFREY 0.70
JENNY JENNIFER 0.80
JERRY GERALD 0.60
JERRY GERALDINE 0.60
JESS JESSICA 0.6
JIM JAMES 0.60
JIMMY JAMES 0.60
JOE JOSEPH 0.75
JOEY JOSEPH 0.60
JON JONATHAN 0.90
JOEY JOSEPHINE 0.6
JOSH JOSHUA 0.85
JUDI JUDITH 0.85
JUDY JUDITH 0.85
JULIE JULIA 0.85
KEN KENNETH 0.75
KENNY KENNETH 0.80
KIM KIMBERLEY 0.70
KIM KIMBERLY 0.70
KIM KIMBERLIE 0.6
KRIS KRISTINA 0.6 F
KRIS KRISTOPHER 0.6 M
LARRY LAURENCE 0.65
LARRY LAWRENCE 0.65
LES LESTER 0.65
LIZ ELIZABETH 0.70
LIZZIE ELIZABETH 0.60
LOU LOUIS 0.70
LUCY LUCIA  0.6
LUCY LUCINDA 0.65
LUKE LUCAS 0.60
MADDY MADELINE 0.70
MADDY MADELYN 0.70
MADIE MADELYN 0.65
MANDY AMANDA 0.70
MANNY EMMANUEL 0.8
MANNY MANUEL 0.8
MARGE MARGARET 0.75
MARGE MARGARETTA 0.65
MARGIE MARJORIE 0.75
MARGY MARJORIE 0.70
MARTY MARTIN 0.80
MARV MARVIN 0.75
MATT MATTHEW 0.75
MERV MERVIN 0.65
MIKE MICHAEL 0.85
MISSY MELISSA 0.75
MITCH MITCHELL 0.85
MONTY LAMONT 0.75
NEWT NEWTON 0.80
NICK NICHOLAS 0.75
NICKIE NICHOLAS 0.75
OBIE OBEDIAH 0.70
OLLIE OLIVER 0.80
OZZY OSWALD 0.80
PAT PATRICIA 0.70
PAT PATRICK 0.70
PATTY PATRICIA 0.75
PETE PETER 0.85
PHIL PHILIP 0.85
PHIL PHILLIP 0.85
PRUDY PRUDENCE 0.65
RAY RAYMOND 0.70
REGGIE REGINALD 0.65
RICH RICHARD 0.85
RICHIE RICHARD 0.80
RON RONALD 0.65
RONNIE RONALD 0.70
RONNY RONALD 0.75
ROZ ROSALYN 0.70
RUBE REUBEN 0.70
RUDY RUDOLPH 0.70
RUSS RUSSELL 0.65
RUSTY RUSSELL 0.60
SAM SAMANTHA 0.65 F
SAM SAMUEL 0.65 M
SAMMY SAMUEL 0.60
SANDY SANDRA 0.80
SLY SYLVESTER 0.75
STEFF STEFANIE 0.8
STEPH STEPHANIE 0.8
STEVE STEPHEN 0.65
STEVE STEVEN 0.65
STU STEWART  0.6
STU STUART  0.6
SUE SUSAN 0.60
SULLY SULLIVAN 0.70
TABBY TABITHA 0.75
TERI THERESA 0.75
TERRY TERENCE 0.65
TESS TERESA 0.70
TESS THERESA 0.70
TESSA TERESA 0.65
TESSA THERESA 0.65
THAD THADDEUS 0.60
THEO THEODORE 0.65
THOM THOMAS 0.60
TIFF TIFFANY  0.6
TIM TIMOTHY 0.65
TIMMY TIMOTHY 0.65
TINA CHRISTINA 0.75
TOM THOMAS 0.75
TOMMY THOMAS 0.75
TONY ANTHONY 0.75
TRISHA PATRICIA 0.75
TRUDY GERTRUDE 0.65
VIC VICTOR 0.65
VICKI VICTORIA 0.60
VICKIE VICTORIA 0.60
VICKY VICTORIA 0.65
WILL WILBUR 0.70
WILLIE WILLIAM 0.65
WINNIE WINNIFRED 0.65
WINNY WINNIFRED 0.65
ZACH ZACHARIAH 0.65
ZACH ZACHARY 0.8
ZACK ZACHARY 0.8
