# Supplementary material for: ScholarLens: extracting competences from research publications for the automatic generation of semantic user profiles
Source: PeerJ journal article supplement (doi:10.7717/peerj-cs.121), 2017-07-03
Supplement: Pipeline.zip [file Pipeline.zip › Pipeline/gate/plugins/ANNIE/resources/schema/ANNIE-Schemas.xml]

<?xml version="1.0" ?>
<schema xmlns="http://www.w3.org/2000/10/XMLSchema">
  <include schemaLocation="AddressSchema.xml" />
  <include schemaLocation="DateSchema.xml" />
  <include schemaLocation="IdentifierSchema.xml" />
  <include schemaLocation="LocationSchema.xml" />
  <include schemaLocation="MoneySchema.xml" />
  <include schemaLocation="OrganizationSchema.xml" />
  <include schemaLocation="PercentSchema.xml" />
  <include schemaLocation="PersonSchema.xml" />
  <include schemaLocation="PhoneSchema.xml" />
  <include schemaLocation="SentenceSchema.xml" />
</schema>
