# Supplementary material for: ScholarLens: extracting competences from research publications for the automatic generation of semantic user profiles
Source: PeerJ journal article supplement (doi:10.7717/peerj-cs.121), 2017-07-03
Supplement: Pipeline.zip [file Pipeline.zip › Pipeline/gate/plugins/ANNIE/resources/schema/LocationSchema.xml]

<?xml version="1.0"?>
<schema xmlns="http://www.w3.org/2000/10/XMLSchema">
  <!-- XSchema deffinition for Location -->
  <element name="Location">
    <complexType>
      <attribute name="locType" use="optional" value="other">
        <simpleType>
          <restriction base="string">
            <enumeration value="region"/>
            <enumeration value="airport"/>
            <enumeration value="city"/>
            <enumeration value="country"/>
            <enumeration value="country"/>
            <enumeration value="province"/>
            <enumeration value="other"/>
          </restriction>
        </simpleType>   
      </attribute>
    </complexType>
  </element>
</schema>
