# Supplementary material for: ScholarLens: extracting competences from research publications for the automatic generation of semantic user profiles
Source: PeerJ journal article supplement (doi:10.7717/peerj-cs.121), 2017-07-03
Supplement: Pipeline.zip [file Pipeline.zip › Pipeline/gate/plugins/ANNIE/resources/schema/PersonSchema.xml]

<?xml version="1.0"?>
<schema xmlns="http://www.w3.org/2000/10/XMLSchema">
  <!-- XSchema definition for Person -->
  <element name="Person">
    <complexType>
      <attribute name="gender" use="optional">
        <simpleType>
          <restriction base="string">
            <enumeration value="male"/>
            <enumeration value="female"/>
          </restriction>
        </simpleType>   
      </attribute>
    </complexType>
  </element>
</schema>
