# Supplementary material for: ScholarLens: extracting competences from research publications for the automatic generation of semantic user profiles
Source: PeerJ journal article supplement (doi:10.7717/peerj-cs.121), 2017-07-03
Supplement: Pipeline.zip [file Pipeline.zip › Pipeline/gate/plugins/ANNIE/resources/sentenceSplitter/gazetteer/abbreviations.lst]

AG
APR
Apr
AUG
Aug
Adm
Brig
CO
CORP
Capt
Cmdr
Co
Col
Comdr
DEC
Dec
DR
Dr
FEB
Feb
Fig
FRI
GMBH
Gen
Gov
INC
JAN
Jan
JUL
Jul
JUN
Jun
LTD
Lt
Ltd
MAR
Mar
MON
Mon
MP
Maj
Mr
Mrs
Ms
NA
NOV
Nov
NV
OCT
Oct
Oy
PLC
Prof
Rep
SA
SAT
Sat
SEP
Sep
SIR
SR
SUN
Sun
Sen
Sgt
SpA
St
THU
Thu
THUR
Thur
TUE
Tue
VP
WED
Wed
ad
al
b
ed
eds
eg
e.g
(e.g
[e.g
et
etc
fig
i.e
(i.e
[i.e
p
usu
vs
yr
yrs
