# Supplementary material for: ScholarLens: extracting competences from research publications for the automatic generation of semantic user profiles
Source: PeerJ journal article supplement (doi:10.7717/peerj-cs.121), 2017-07-03
Supplement: Pipeline.zip [file Pipeline.zip › Pipeline/gate/plugins/ANNIE/resources/sentenceSplitter/grammar/find-single-nl.jape]

/*
*  cr.jape
*
* Copyright (c) 1998-2004, The University of Sheffield.
*
*  This file is part of GATE (see http://gate.ac.uk/), and is free
*  software, licenced under the GNU Library General Public License,
*  Version 2, June 1991 (in the distribution as file licence.html,
*  and also available at http://gate.ac.uk/gate/licence.html).
*
*  Diana Maynard, 10 Sep 2001
* 
*  $Id: find-single-nl.jape 9798 2008-08-07 15:26:51Z ian_roberts $
*/

Phase:	find
Input: Token SpaceToken Lookup DEFAULT_TOKEN
Options: control = appelt

Macro: FULLSTOP
(
 {Token.string=="."}
)

//we'll allow two, three or four dots 
Macro: THREEDOTS
(
 {Token.string=="."}
 {Token.string=="."}
 ({Token.string=="."})?
 ({Token.string=="."})?
)

Macro: PUNCT
(
  {Token.string == "!"} | 
  {Token.string == "?"}
)

Macro: NEWLINE
(
  {SpaceToken.string == "\n"} |
  {SpaceToken.string=="\n\r"} |
  ({SpaceToken.string=="\n"}{SpaceToken.string=="\r"}) |
  {SpaceToken.string=="\r\n"} |
  ({SpaceToken.string=="\r"}{SpaceToken.string=="\n"})
)


//normal sentence split 
Rule: Split1
(
 (PUNCT)+ |
 FULLSTOP |
 THREEDOTS
)
:split
-->
:split.Split = {kind = "internal"}

//a single new line generates an external split
Rule: CR
(
  NEWLINE
  ({SpaceToken.kind == space})*
):cr
-->
:cr.Split = {kind = "external"}
  
//Anything more than four dots is a line of dots (e.g. in tables of contents)
Rule: Ldots
  FULLSTOP
  FULLSTOP
  FULLSTOP
  FULLSTOP
  (FULLSTOP)+
-->
{}

//Java class names
Rule:dottedName
  {Token.kind == word}
  (FULLSTOP {Token.kind == word})+
-->
{}

// numbers with decimal part or IP addresses
Rule:Number
  {Token.kind == number}
  (FULLSTOP {Token.kind == number})+
-->
{}

//full stops in .net, .NET, .Net
Rule:DotNetStop
 FULLSTOP
 (
   {Token.string == "NET"} |
   {Token.string == "net"} |
   {Token.string == "Net"}
 )
-->
{}

//file extensions like .exe or .EXE
//unfortunately we can't avoid .Exe as this might be a legitimate split
//even if there is no space after the full stop.
Rule:DotFileName
  FULLSTOP
  (
    {Token.orth == "lowercase"} | 
    {Token.orth == "allCaps"} |
    {Token.orth == "mixedCaps"}
  )
-->
{}

//Known abbreviations like "Prof."
//this relies on the gazetteer which has a funny sense of whole words
//hence we need to check for a space before
//otherwise things like "640p." would not be identitfied (because p is a
//known abbreviation).
Rule: Abbrev1
 {SpaceToken}
 {Lookup.majorType == "splitter_abbreviation"}
 {Token.string == "."}
-->
{}

//Abbreviations like "B.B.C."
Rule: Abbrev2
({Token.orth=="upperInitial", Token.length=="1"} FULLSTOP)+
-->
{}
