# Supplementary material for: ScholarLens: extracting competences from research publications for the automatic generation of semantic user profiles
Source: PeerJ journal article supplement (doi:10.7717/peerj-cs.121), 2017-07-03
Supplement: Pipeline.zip [file Pipeline.zip › Pipeline/gate/plugins/ANNIE/resources/sentenceSplitter/grammar/main-single-nl.jape]

// SplitMain
// Valentin Tablan 17/05/2001


//A sentence splitter
MultiPhase:	main
Phases: 

prepare
find-single-nl
split
cleanup
