# Supplementary material for: ScholarLens: extracting competences from research publications for the automatic generation of semantic user profiles
Source: PeerJ journal article supplement (doi:10.7717/peerj-cs.121), 2017-07-03
Supplement: Pipeline.zip [file Pipeline.zip › Pipeline/gate/plugins/ANNIE/resources/sentenceSplitter/grammar/no-splits.jape]

/*
*  no-splits.jape
*
* Copyright (c) 1998-2004, The University of Sheffield.
*
*  This file is part of GATE (see http://gate.ac.uk/), and is free
*  software, licenced under the GNU Library General Public License,
*  Version 2, June 1991 (in the distribution as file licence.html,
*  and also available at http://gate.ac.uk/gate/licence.html).
*
*  Valentin Tablan, 23 Jan 2007
* 
*  $Id$
*/

//This grammar deals with documents that have no splits

Phase:noSplits
Input: Token Split
Options: control = once

Rule: blah
{Token}
-->
{
  AnnotationSet splits = inputAS.get("Split");
  if(splits == null || splits.isEmpty()){
    outputAS.add(outputAS.firstNode(), outputAS.lastNode(), 
            "TempNoSplitText", Factory.newFeatureMap());
  }
}
