# Supplementary material for: ScholarLens: extracting competences from research publications for the automatic generation of semantic user profiles
Source: PeerJ journal article supplement (doi:10.7717/peerj-cs.121), 2017-07-03
Supplement: Pipeline.zip [file Pipeline.zip › Pipeline/gate/plugins/ANNIE/resources/sentenceSplitter/grammar/split.jape]

/*
*  splitter.jape
*
* Copyright (c) 1998-2004, The University of Sheffield.
*
*  This file is part of GATE (see http://gate.ac.uk/), and is free
*  software, licenced under the GNU Library General Public License,
*  Version 2, June 1991 (in the distribution as file licence.html,
*  and also available at http://gate.ac.uk/gate/licence.html).
*
*  Valentin Tablan, March 7th, 2007
*
*  $Id: split.jape 17376 2014-02-21 10:07:24Z dgmaynard $
*/

Phase:split
Input: Split TempNoSplitText
Options: control = first


//sentence that consumes a split
Rule: internalSplits
({Split.kind == "internal"}):isplit
-->
{
  Long endOffset = ((AnnotationSet)bindings.get("isplit")).
      lastNode().getOffset();
  //find the end offset of previous sentences
  Long lastOffset = (Long)doc.getFeatures().get("temp-last-sentence-end");
  if(lastOffset == null) lastOffset = new Long(0);
//  
//  AnnotationSet sentences = outputAS.get("Sentence");
//  Long lastOffset = sentences == null || sentences.isEmpty() ?
//          new Long(0) :
//          sentences.lastNode().getOffset();  
  //get the start offset of the first token.kind==word
  AnnotationSet tokens = inputAS.getContained(lastOffset, endOffset);
  if(tokens != null) tokens = tokens.get("Token");
  if(tokens != null && tokens.size() > 0){
    List<Annotation> tokList = new ArrayList<Annotation>(tokens);
    Collections.sort(tokList, new OffsetComparator());
    for(Annotation token : tokList){
      String tokenKind = (String)token.getFeatures().get("kind");
      //if("word".equals(tokenKind)){
        Long startOffset = token.getStartNode().getOffset();
        if(startOffset.compareTo(endOffset) < 0){
          //create the new sentence
          try{
            outputAS.add(startOffset, endOffset, "Sentence", 
                    Factory.newFeatureMap());
            //save the new end offset
            doc.getFeatures().put("temp-last-sentence-end", endOffset);
          }catch( InvalidOffsetException ioe){
            throw new GateRuntimeException(ioe);
          }
       // }
        return;
      }
    }
  }
}

//sentence that doesn't consume a split
Rule: externalSplits
({Split.kind == "external"}):esplit
-->
{
  Long endOffset = ((AnnotationSet)bindings.get("esplit")).
      firstNode().getOffset();
//  //get the end offset of the previous sentence
//  AnnotationSet sentences = outputAS.get("Sentence");
//  Long lastOffset = sentences == null || sentences.isEmpty() ?
//          new Long(0) :
//          sentences.lastNode().getOffset();  
  //find the end offset of previous sentences
  Long lastOffset = (Long)doc.getFeatures().get("temp-last-sentence-end");
  if(lastOffset == null) lastOffset = new Long(0);
  
  //get the start offset of the first token.kind==word
  AnnotationSet tokens = inputAS.getContained(lastOffset, endOffset);
  if(tokens != null) tokens = tokens.get("Token");
  if(tokens != null && tokens.size() > 0){
    //we have a more precise end offset
    endOffset = tokens.lastNode().getOffset();
    List<Annotation> tokList = new ArrayList<Annotation>(tokens);
    Collections.sort(tokList, new OffsetComparator());
    for(Annotation token : tokList){
      String tokenKind = (String)token.getFeatures().get("kind");
     // if("word".equals(tokenKind)){
        Long startOffset = token.getStartNode().getOffset();
        if(startOffset.compareTo(endOffset) < 0){
          //create the new sentence
          try{
            outputAS.add(startOffset, endOffset, "Sentence", 
                    Factory.newFeatureMap());
            doc.getFeatures().put("temp-last-sentence-end", endOffset);
          }catch( InvalidOffsetException ioe){
            throw new GateRuntimeException(ioe);
          }
       // }
        return;
      }
    }
  }
}
