# Supplementary material for: ScholarLens: extracting competences from research publications for the automatic generation of semantic user profiles
Source: PeerJ journal article supplement (doi:10.7717/peerj-cs.121), 2017-07-03
Supplement: Pipeline.zip [file Pipeline.zip › Pipeline/gate/plugins/TextMining-MuNPEx/build.properties]

#
# build.properties for MuNPEx
# http://www.semanticsoftware.info/munpex
#
# gate.home - the location of your top-level GATE directory
# If your plugin is not located in the default plugins directory
# of gate (GATEHOME/plugins/) the full path of the GATE home direcoty
# should be specified here.
#
#gate.home=/usr/local/durmtools/GATE/gate
gate.home=/Applications/devtools/GATE
# The name of this plugin.
# If you want to overwrite the name as specified in the build.xml file,
# you can do it here. 
#plugin.name=MuNPEx

# All other settings in the build.xml file can be overwritten here ...
#
