# Supplementary material for: ScholarLens: extracting competences from research publications for the automatic generation of semantic user profiles
Source: PeerJ journal article supplement (doi:10.7717/peerj-cs.121), 2017-07-03
Supplement: Pipeline.zip [file Pipeline.zip › Pipeline/gate/plugins/TextMining-MuNPEx/creole.xml]

<CREOLE-DIRECTORY ID="MuNPEx" VERSION="2.0-r190" GATE-MIN="6.0"
        DESCRIPTION="Multi-lingual Noun Phrase Extractor (MuNPEx) - a noun phrase chunker for English, German, and French (with Spanish in beta)" HELPURL="http://www.semanticsoftware.info/munpex">
     <JAR SCAN="true">MuNPEx.jar</JAR>
     <!--JAR SCAN="true">MuNPEx_EN.jar</JAR-->
</CREOLE-DIRECTORY>
