# Supplementary material for: ScholarLens: extracting competences from research publications for the automatic generation of semantic user profiles
Source: PeerJ journal article supplement (doi:10.7717/peerj-cs.121), 2017-07-03
Supplement: Pipeline.zip [file Pipeline.zip › Pipeline/gate/plugins/TextMining-MuNPEx/optional/treetagger-lemma.jape]

//
// Multilingual Noun Phrase Extractor (MuNPEx)
// http://www.semanticsoftware.info/munpex
//
// Helper grammar to add an HEAD_LEMMA slot with a lemmatized version
// of the word contained in the HEAD slot using the output of the
// TreeTagger
//
// Copyright (c) 2005, 2006, 2010, 2012, 2015 Rene Witte (http://rene-witte.net)
//
// This library is free software; you can redistribute it and/or
// modify it under the terms of the GNU Lesser General Public
// License as published by the Free Software Foundation; either
// version 3.0 of the License, or (at your option) any later version.
//
// This library is distributed in the hope that it will be useful,
// but WITHOUT ANY WARRANTY; without even the implied warranty of
// MERCHANTABILITY or FITNESS FOR A PARTICULAR PURPOSE.  See the GNU
// Lesser General Public License for more details.
//
// You should have received a copy of the GNU Lesser General Public
// License along with this library.  If not, see <http://www.gnu.org/licenses/>.
//

Phase: TREETAGGER_NP_Lemma
Input: NP Token
Options: control = appelt

Rule: TTNPLemma
Priority: 50
(
	{NP}
):np1
-->
{
AnnotationSet npSet = bindings.get("np1");
Annotation npAnn = npSet.iterator().next();
FeatureMap npFeatures = npAnn.getFeatures();
long headStart = ((Long)npFeatures.get( "HEAD_START" )).longValue();
long headEnd = ((Long)npFeatures.get( "HEAD_END" )).longValue();
AnnotationSet lemmas = doc.getAnnotations().get( "Token", headStart, headEnd );
String lemmaStr = null;
if( lemmas != null ) {
    Iterator lemmaIterator = lemmas.iterator();
    if( lemmaIterator.hasNext() ) {
	Annotation lemma = (Annotation)lemmaIterator.next();
	if( !lemmaIterator.hasNext() )
	    lemmaStr = (String)lemma.getFeatures().get( "lemma" );
    }
}
String npLemma = (String)npAnn.getFeatures().get( "HEAD" ).toString();
if( lemmaStr != null && lemmaStr.length() <= npLemma.length() )
    npLemma = lemmaStr;
npFeatures.put( "HEAD_LEMMA", npLemma );
}
