# Supplementary material for: ScholarLens: extracting competences from research publications for the automatic generation of semantic user profiles
Source: PeerJ journal article supplement (doi:10.7717/peerj-cs.121), 2017-07-03
Supplement: Pipeline.zip [file Pipeline.zip › Pipeline/gate/plugins/TextMining-MuNPEx/README.md]

# TextMining-MuNPEx
The Multi-Lingual Noun Phrase Extractor (MuNPEx) is a GATE plugin

See http://www.semanticsoftware.info/munpex for more information.   
See http://assistant.semanticsoftware.info/job/TextMining-MuNPEx/ for a continuous integration build.
