# Supplementary material for: ScholarLens: extracting competences from research publications for the automatic generation of semantic user profiles
Source: PeerJ journal article supplement (doi:10.7717/peerj-cs.121), 2017-07-03
Supplement: Pipeline.zip [file Pipeline.zip › Pipeline/gate/plugins/TextMining-MuNPEx/resources/de-np-parts.jape]

//
// Multilingual Noun Phrase Extractor (MuNPEx)
// http://www.semanticsoftware.info/munpex
//
// German NPs
//
// Copyright (c) 2005, 2006, 2010, 2012, 2015 Rene Witte (http://rene-witte.net)
//
// This library is free software; you can redistribute it and/or
// modify it under the terms of the GNU Lesser General Public
// License as published by the Free Software Foundation; either
// version 3.0 of the License, or (at your option) any later version.
//
// This library is distributed in the hope that it will be useful,
// but WITHOUT ANY WARRANTY; without even the implied warranty of
// MERCHANTABILITY or FITNESS FOR A PARTICULAR PURPOSE.  See the GNU
// Lesser General Public License for more details.
//
// You should have received a copy of the GNU Lesser General Public
// License along with this library.  If not, see <http://www.gnu.org/licenses/>.
//

Phase: DE_NP_Parts
Input: Token Number
Options: control = appelt

Rule: det
Priority: 50
(
	({Token.category == ART})
):det
-->
	:det.tempNP = {kind = "DET"}


Rule: mod
Priority: 50
(
	{Token.category == ADV}|
	{Token.category == ADJA}|
	{Token.category == ADJD}|
	{Token.category == CARD}|
	{Token.category == PPOSAT}|
	{Number}
):mod
-->
	:mod.tempNP = {kind = "MOD"}


Rule: pronoun
	//{Token.category == PPER}|
	{Token.category == PDS})
):head
-->
	:head.tempNP = {kind = "HEAD", Pronoun="true"}


Rule: head
(
	(({Token.category == TRUNC})[0,5])
	  ({Token.category == NN}|
	  {Token.category == NE}|
	  {Token.category == FM}|
):head
-->
	:head.tempNP = {kind = "HEAD", Pronoun="false"}}


Rule: head2
(
	({Token.Comment == "<unknown>", Token.orth == "upperInitial"}|{Token.category == NN}|{Token.category == NE})
	(
		{Token.string == "-"}
		({Token.Comment == "<unknown>", Token.orth == "upperInitial"}|{Token.category == NN}|{Token.category == NE})
	)*
):head
-->
	:head.tempNP = {kind = "HEAD", Pronoun="false"}}
