# Supplementary material for: ScholarLens: extracting competences from research publications for the automatic generation of semantic user profiles
Source: PeerJ journal article supplement (doi:10.7717/peerj-cs.121), 2017-07-03
Supplement: Pipeline.zip [file Pipeline.zip › Pipeline/gate/plugins/TextMining-MuNPEx/resources/en-np-parts.jape]

//
// Multilingual Noun Phrase Extractor (MuNPEx)
// http://www.semanticsoftware.info/munpex
//
// English NP parts
//
// Copyright (c) 2005, 2006, 2010, 2012, 2015 Rene Witte (http://rene-witte.net)
//
// This library is free software; you can redistribute it and/or
// modify it under the terms of the GNU Lesser General Public
// License as published by the Free Software Foundation; either
// version 3.0 of the License, or (at your option) any later version.
//
// This library is distributed in the hope that it will be useful,
// but WITHOUT ANY WARRANTY; without even the implied warranty of
// MERCHANTABILITY or FITNESS FOR A PARTICULAR PURPOSE.  See the GNU
// Lesser General Public License for more details.
//
// You should have received a copy of the GNU Lesser General Public
// License along with this library.  If not, see <http://www.gnu.org/licenses/>.
//

Phase: EN_NP_Parts
Input: Token Date Person Unknown Number Organization Location Address AbbrNAcro Money Percent Organism
Options: control = brill

Macro: QUOTES
(
	{Token.category == "''"}|
	{Token.category == "``"}|
	{Token.string == "\""}|
	{Token.string == "'"}|
	{Token.string == "`"}|
	{Token.string == "´"}|
	{Token.string == "''"}|
	{Token.string == "``"}|
	{Token.string == "´´"}|
	{Token.string == "”"}|
	{Token.string == "“"}|
	{Token.string == "”"}|
	{Token.string == "‘"}| 
	{Token.string == "’"}|
	{Token.string == "«"}|
	{Token.string == "»"}|
	{Token.string == "‹"}|
	{Token.string == "›"}|
	{Token.string == "’"}|
	{Token.string == "'"}|
	{Token.string == "「"}|
	{Token.string == "」"}|
	{Token.string == "『"}|
	{Token.string == "』"}
)

Macro: ANNIE_ENTITIES
(
	{Person}|
	{Unknown}|
	{Organization}|
	{Location}|
	{Address}|
	{Money}|
	{Percent}|
	{Date}
)

Macro: BIO_ENTITIES
(
	{Organism}             // from the OrganismTagger
)

Rule: det
(
	{Token.category == DT}|
	{Token.category == WDT}|
	{Token.category == "PRP$"}|
	({Token.category == PDT}{Token.category == DET})|
	({Token.category == DT}{Token.category == DT})
)
:det
-->
	:det.tempNP = {kind = "DET"}


Rule: mod
(
	(QUOTES)?
	({Token.category == CD}|
	{Token.category == JJ}|
	{Token.category == JJR}|
	{Token.category == JJS}|
//	{Token.category == CC}|
	{Token.category == RP}|
	{Token.category == RB}|
	{Token.category == RBR}|
	{Token.category == RBS}|
	{Token.category == PART}|
	{Token.category == NN}|
	{Token.category == NNS}|
	{Token.category == NNP}|
	{Token.category == NNPS}|
	{Token.category == POS}|
//	{Token.category == VB}|
//	{Token.category == VBP}|
//	{Token.category == VBN}|
//	{Token.category == VBD}|
//	{Token.category == VBG}|
	({Token.category == ","}{Token.category == JJ})|
	{Token.string == "-"}|
	ANNIE_ENTITIES|
	BIO_ENTITIES|
	{Number}|
	{AbbrNAcro})
	(QUOTES)?
):mod
-->
	:mod.tempNP = {kind = "MOD"}


Rule: pronoun
(
	{Token.category == PRP}
):head
-->
	:head.tempNP = {kind = "HEAD", Pronoun="true"}


Rule: head
(
	{Token.category == NN}|
	{Token.category == NNP}|
	{Token.category == NNPS}|
	{Token.category == NNS}|
	{Token.category == RP}|
	{Token.category == CD}
//	{Token.category == WP}|
//	{Token.category == WRB}|
//	{Token.category == WDT}|
//	{Token.category == EX}
//=======
//	{Token.category == EX}
):head
-->
	:head.tempNP = {kind = "HEAD", Pronoun="false"}
