# Supplementary material for: ScholarLens: extracting competences from research publications for the automatic generation of semantic user profiles
Source: PeerJ journal article supplement (doi:10.7717/peerj-cs.121), 2017-07-03
Supplement: Pipeline.zip [file Pipeline.zip › Pipeline/gate/plugins/TextMining-MuNPEx/resources/np-entities.jape]

//
// Multilingual Noun Phrase Extractor (MuNPEx)
// http://www.semanticsoftware.info/munpex
//
// Grammar for detecting Named Entities
//
// Copyright (c) 2005, 2006, 2010, 2012, 2015 Rene Witte (http://rene-witte.net)
//
// This library is free software; you can redistribute it and/or
// modify it under the terms of the GNU Lesser General Public
// License as published by the Free Software Foundation; either
// version 3.0 of the License, or (at your option) any later version.
//
// This library is distributed in the hope that it will be useful,
// but WITHOUT ANY WARRANTY; without even the implied warranty of
// MERCHANTABILITY or FITNESS FOR A PARTICULAR PURPOSE.  See the GNU
// Lesser General Public License for more details.
//
// You should have received a copy of the GNU Lesser General Public
// License along with this library.  If not, see <http://www.gnu.org/licenses/>.
//

Phase: NP_Entities
Input: Person Unknown Organization Location Number Address AbbrNAcro Money Percent Date DATE LOC NMB ORG PER PROF TIME PRC Organism
Options: control = appelt

Macro: ANNIE_ENTITIES
// entities that come with the default ANNIE application
// the same entities also appear with the French plugin for GATE
(
	{Person}|
	{Unknown}|
	{Organization}|
	{Location}|
	{Address}|
	{Money}|
	{Percent}|
	{Date}
)

Macro: GERMAN_ENTITIES
// these are the entites that come with the GATE plugin for German
(
	{DATE}|
	{LOC}|
//	{NMB}|
	{ORG}|
	{PER}|
	{PROF}|
	{TIME}|
	{PRC}
)

Macro: BIO_ENTITIES
// biological entities
(
	{Organism}              // from the OrganismTagger
)

Rule: head
Priority: 90
(
	ANNIE_ENTITIES|
	GERMAN_ENTITIES|
	BIO_ENTITIES|
	{Number}|
	{AbbrNAcro}
):head
-->
	:head.tempNP = {kind = "HEAD", Pronoun="false"}
