# Supplementary material for: ScholarLens: extracting competences from research publications for the automatic generation of semantic user profiles
Source: PeerJ journal article supplement (doi:10.7717/peerj-cs.121), 2017-07-03
Supplement: Pipeline.zip [file Pipeline.zip › Pipeline/gate/plugins/TextMining-MuNPEx/resources/np.jape]

//
// Multilingual Noun Phrase Extractor (MuNPEx)
// http://www.semanticsoftware.info/munpex
//
// Produces minimal NPs, i.e., no PP or other attachments
// Results stored in "NP" annotations with DET, MOD, HEAD slots
//
//
// Copyright (c) 2005, 2006, 2010, 2012, 2015 Rene Witte (http://rene-witte.net)
//
// This library is free software; you can redistribute it and/or
// modify it under the terms of the GNU Lesser General Public
// License as published by the Free Software Foundation; either
// version 3.0 of the License, or (at your option) any later version.
//
// This library is distributed in the hope that it will be useful,
// but WITHOUT ANY WARRANTY; without even the implied warranty of
// MERCHANTABILITY or FITNESS FOR A PARTICULAR PURPOSE.  See the GNU
// Lesser General Public License for more details.
//
// You should have received a copy of the GNU Lesser General Public
// License along with this library.  If not, see <http://www.gnu.org/licenses/>.
//

Phase: NP_Chunking
Input: Token tempNP Split MultiDocSplit
Options: control = appelt


Rule: NP
Priority: 50
(
        // Determiner
	(({tempNP.kind == DET})?):det

        // Modifiers
	// Upto 9 modifiers for now (used to be "*", but this is more robust)
	(({tempNP.kind == MOD})[0,9]):mod

        // Head Noun
	({tempNP.kind == HEAD}):head

        // Post-Head Modifiers
        (({tempNP.kind == MOD2})[0,5]):mod2
):np
-->
{
AnnotationSet det  = bindings.get("det");
AnnotationSet mod  = bindings.get("mod");
AnnotationSet head = bindings.get("head");
AnnotationSet np   = bindings.get("np");
AnnotationSet mod2 = bindings.get("mod2");
Annotation headAnn = (gate.Annotation)head.iterator().next();
FeatureMap features = Factory.newFeatureMap();

// offset features
features.put("HEAD_END", headAnn.getEndNode().getOffset());
features.put("HEAD_START", headAnn.getStartNode().getOffset());
features.put("Pronoun", headAnn.getFeatures().get("Pronoun"));
Long modStart = null;
Long modEnd = null;
if( mod != null ) {
    Iterator modIterator = mod.iterator();
    Annotation modAnn = (Annotation)modIterator.next();
    modStart = modAnn.getStartNode().getOffset();
    modEnd = modAnn.getEndNode().getOffset();
    while( modIterator.hasNext()) {
        modAnn = (Annotation)modIterator.next();
	if( modAnn.getStartNode().getOffset().longValue() < modStart.longValue() )
            modStart = modAnn.getStartNode().getOffset();
	if( modAnn.getEndNode().getOffset().longValue() > modEnd.longValue() )
            modEnd = modAnn.getEndNode().getOffset();
    }
    // you can comment out these two lines if you don't need MOD position information
    features.put( "MOD_START", modStart );
    features.put( "MOD_END", modEnd );
}
if( det != null ) {
    gate.Annotation detAnn = (gate.Annotation)det.iterator().next();
    // you can comment out these two lines if you don't need DET position information
    features.put( "DET_END", detAnn.getEndNode().getOffset());
    features.put( "DET_START", detAnn.getStartNode().getOffset());
}

// content features
try {
    features.put( "HEAD", doc.getContent().getContent( headAnn.getStartNode().getOffset(), headAnn.getEndNode().getOffset() ).toString());
} catch (Exception ex) {
    System.out.println( "Exception in np.jape: " + ex );
}
if( mod != null ) {
    try {
        features.put( "MOD", doc.getContent().getContent( modStart, modEnd ).toString() );
    } catch (Exception ex) {
        System.out.println( "Exception in np.jape: " + ex );
    }
}
if( det != null ) {
    gate.Annotation detAnn = (gate.Annotation)det.iterator().next();
    try {
        features.put( "DET", doc.getContent().getContent( detAnn.getStartNode().getOffset(), detAnn.getEndNode().getOffset() ).toString());
    } catch (Exception ex) {
        System.out.println( "Exception in np.jape: " + ex );
    }
}
if( mod2 != null ) {
    gate.Annotation mod2Ann = (gate.Annotation)mod2.iterator().next();
    try {
        features.put( "MOD2", doc.getContent().getContent( mod2Ann.getStartNode().getOffset(), mod2Ann.getEndNode().getOffset() ).toString());
    } catch (Exception ex) {
        System.out.println( "Exception in np.jape: " + ex );
    }
}

// Add the NP	
// features.put( "rule", "NP" );
outputAS.add( np.firstNode(), np.lastNode(), "NP", features );
}
