# Supplementary material for: ScholarLens: extracting competences from research publications for the automatic generation of semantic user profiles
Source: PeerJ journal article supplement (doi:10.7717/peerj-cs.121), 2017-07-03
Supplement: Pipeline.zip [file Pipeline.zip › Pipeline/gate/plugins/TextMining-MuNPEx/version.properties]

#This file is automatically generated - DO NOT EDIT
#Sat, 12 Nov 2016 14:42:25 -0500

buildtime=2016-11-12-14-42-25
builder=bahar
release=2.0
