# Supplementary material for: ScholarLens: extracting competences from research publications for the automatic generation of semantic user profiles
Source: PeerJ journal article supplement (doi:10.7717/peerj-cs.121), 2017-07-03
Supplement: Pipeline.zip [file Pipeline.zip › Pipeline/gate/SemanticProfilingDemo.xgapp]

<?xml version="1.0" encoding="UTF-8"?>
<gate.util.persistence.GateApplication>
  <urlList class="gate.util.persistence.CollectionPersistence">
    <localList>
      <gate.util.persistence.PersistenceManager-URLHolder>
        <urlString>$relpath$plugins/ANNIE</urlString>
      </gate.util.persistence.PersistenceManager-URLHolder>
      <gate.util.persistence.PersistenceManager-URLHolder>
        <urlString>$relpath$plugins/TextMining-LODtagger</urlString>
      </gate.util.persistence.PersistenceManager-URLHolder>
      <gate.util.persistence.PersistenceManager-URLHolder>
        <urlString>$relpath$plugins/Tools</urlString>
      </gate.util.persistence.PersistenceManager-URLHolder>
      <gate.util.persistence.PersistenceManager-URLHolder>
        <urlString>$relpath$plugins/TextMining-Rhetector</urlString>
      </gate.util.persistence.PersistenceManager-URLHolder>
      <gate.util.persistence.PersistenceManager-URLHolder>
        <urlString>$relpath$plugins/LODeXporter</urlString>
      </gate.util.persistence.PersistenceManager-URLHolder>
      <gate.util.persistence.PersistenceManager-URLHolder>
        <urlString>$relpath$plugins/TextMining-MuNPEx</urlString>
      </gate.util.persistence.PersistenceManager-URLHolder>
      <gate.util.persistence.PersistenceManager-URLHolder>
        <urlString>$relpath$plugins/JAPE_Plus</urlString>
      </gate.util.persistence.PersistenceManager-URLHolder>
    </localList>
    <collectionType>java.util.ArrayList</collectionType>
  </urlList>
  <application class="gate.util.persistence.ConditionalSerialAnalyserControllerPersistence">
    <strategiesList class="gate.util.persistence.CollectionPersistence">
      <localList>
        <gate.util.persistence.AnalyserRunningStrategyPersistence>
          <runMode>1</runMode>
          <featureName />
          <featureValue />
          <pr class="gate.util.persistence.PRPersistence">
            <runtimeParams class="gate.util.persistence.MapPersistence">
              <mapType>gate.util.SimpleFeatureMapImpl</mapType>
              <localMap>
                <entry>
                  <string>setsToKeep</string>
                  <gate.util.persistence.CollectionPersistence>
                    <localList>
                      <string>Key</string>
                    </localList>
                    <collectionType>java.util.ArrayList</collectionType>
                  </gate.util.persistence.CollectionPersistence>
                </entry>
                <entry>
                  <string>keepOriginalMarkupsAS</string>
                  <boolean>true</boolean>
                </entry>
                <entry>
                  <string>corpus</string>
                  <null />
                </entry>
                <entry>
                  <string>setsToRemove</string>
                  <null />
                </entry>
                <entry>
                  <string>annotationTypes</string>
                  <null />
                </entry>
                <entry>
                  <string>document</string>
                  <null />
                </entry>
              </localMap>
            </runtimeParams>
            <resourceType>gate.creole.annotdelete.AnnotationDeletePR</resourceType>
            <resourceName>Document Reset PR</resourceName>
            <initParams class="gate.util.persistence.MapPersistence">
              <mapType>gate.util.SimpleFeatureMapImpl</mapType>
              <localMap />
            </initParams>
            <features class="gate.util.persistence.MapPersistence">
              <mapType>gate.util.SimpleFeatureMapImpl</mapType>
              <localMap />
            </features>
          </pr>
        </gate.util.persistence.AnalyserRunningStrategyPersistence>
        <gate.util.persistence.AnalyserRunningStrategyPersistence>
          <runMode>1</runMode>
          <pr class="gate.util.persistence.LanguageAnalyserPersistence">
            <runtimeParams class="gate.util.persistence.MapPersistence">
              <mapType>gate.util.SimpleFeatureMapImpl</mapType>
              <localMap>
                <entry>
                  <string>annotationSetName</string>
                  <null />
                </entry>
                <entry>
                  <string>corpus</string>
                  <null />
                </entry>
                <entry>
                  <string>document</string>
                  <null />
                </entry>
              </localMap>
            </runtimeParams>
            <resourceType>gate.creole.tokeniser.DefaultTokeniser</resourceType>
            <resourceName>ANNIE English Tokeniser</resourceName>
            <initParams class="gate.util.persistence.MapPersistence">
              <mapType>gate.util.SimpleFeatureMapImpl</mapType>
              <localMap>
                <entry>
                  <string>tokeniserRulesURL</string>
                  <gate.util.persistence.PersistenceManager-URLHolder>
                    <urlString>$relpath$plugins/ANNIE/resources/tokeniser/DefaultTokeniser.rules</urlString>
                  </gate.util.persistence.PersistenceManager-URLHolder>
                </entry>
                <entry>
                  <string>encoding</string>
                  <string>UTF-8</string>
                </entry>
                <entry>
                  <string>transducerGrammarURL</string>
                  <gate.util.persistence.PersistenceManager-URLHolder>
                    <urlString>$relpath$plugins/ANNIE/resources/tokeniser/postprocess.jape</urlString>
                  </gate.util.persistence.PersistenceManager-URLHolder>
                </entry>
              </localMap>
            </initParams>
            <features class="gate.util.persistence.MapPersistence">
              <mapType>gate.util.SimpleFeatureMapImpl</mapType>
              <localMap />
            </features>
          </pr>
        </gate.util.persistence.AnalyserRunningStrategyPersistence>
        <gate.util.persistence.AnalyserRunningStrategyPersistence>
          <runMode>1</runMode>
          <featureName />
          <featureValue />
          <pr class="gate.util.persistence.LanguageAnalyserPersistence">
            <runtimeParams class="gate.util.persistence.MapPersistence">
              <mapType>gate.util.SimpleFeatureMapImpl</mapType>
              <localMap>
                <entry>
                  <string>annotationSetName</string>
                  <null />
                </entry>
                <entry>
                  <string>corpus</string>
                  <null />
                </entry>
                <entry>
                  <string>longestMatchOnly</string>
                  <boolean>true</boolean>
                </entry>
                <entry>
                  <string>wholeWordsOnly</string>
                  <boolean>true</boolean>
                </entry>
                <entry>
                  <string>document</string>
                  <null />
                </entry>
              </localMap>
            </runtimeParams>
            <resourceType>gate.creole.gazetteer.DefaultGazetteer</resourceType>
            <resourceName>ANNIE Gazetteer</resourceName>
            <initParams class="gate.util.persistence.MapPersistence">
              <mapType>gate.util.SimpleFeatureMapImpl</mapType>
              <localMap>
                <entry>
                  <string>gazetteerFeatureSeparator</string>
                  <string>:</string>
                </entry>
                <entry>
                  <string>listsURL</string>
                  <gate.util.persistence.PersistenceManager-URLHolder>
                    <urlString>$relpath$plugins/ANNIE/resources/gazetteer/lists.def</urlString>
                  </gate.util.persistence.PersistenceManager-URLHolder>
                </entry>
                <entry>
                  <string>encoding</string>
                  <string>UTF-8</string>
                </entry>
                <entry>
                  <string>caseSensitive</string>
                  <boolean>true</boolean>
                </entry>
              </localMap>
            </initParams>
            <features class="gate.util.persistence.MapPersistence">
              <mapType>gate.util.SimpleFeatureMapImpl</mapType>
              <localMap />
            </features>
          </pr>
        </gate.util.persistence.AnalyserRunningStrategyPersistence>
        <gate.util.persistence.AnalyserRunningStrategyPersistence>
          <runMode>1</runMode>
          <featureName />
          <featureValue />
          <pr class="gate.util.persistence.LanguageAnalyserPersistence">
            <runtimeParams class="gate.util.persistence.MapPersistence">
              <mapType>gate.util.SimpleFeatureMapImpl</mapType>
              <localMap>
                <entry>
                  <string>corpus</string>
                  <null />
                </entry>
                <entry>
                  <string>outputASName</string>
                  <null />
                </entry>
                <entry>
                  <string>inputASName</string>
                  <null />
                </entry>
                <entry>
                  <string>document</string>
                  <null />
                </entry>
              </localMap>
            </runtimeParams>
            <resourceType>gate.creole.splitter.SentenceSplitter</resourceType>
            <resourceName>ANNIE Sentence Splitter</resourceName>
            <initParams class="gate.util.persistence.MapPersistence">
              <mapType>gate.util.SimpleFeatureMapImpl</mapType>
              <localMap>
                <entry>
                  <string>gazetteerListsURL</string>
                  <gate.util.persistence.PersistenceManager-URLHolder>
                    <urlString>$relpath$plugins/ANNIE/resources/sentenceSplitter/gazetteer/lists.def</urlString>
                  </gate.util.persistence.PersistenceManager-URLHolder>
                </entry>
                <entry>
                  <string>encoding</string>
                  <string>UTF-8</string>
                </entry>
                <entry>
                  <string>transducerURL</string>
                  <gate.util.persistence.PersistenceManager-URLHolder>
                    <urlString>$relpath$plugins/ANNIE/resources/sentenceSplitter/grammar/main-single-nl.jape</urlString>
                  </gate.util.persistence.PersistenceManager-URLHolder>
                </entry>
              </localMap>
            </initParams>
            <features class="gate.util.persistence.MapPersistence">
              <mapType>gate.util.SimpleFeatureMapImpl</mapType>
              <localMap />
            </features>
          </pr>
        </gate.util.persistence.AnalyserRunningStrategyPersistence>
        <gate.util.persistence.AnalyserRunningStrategyPersistence>
          <runMode>1</runMode>
          <featureName />
          <featureValue />
          <pr class="gate.util.persistence.LanguageAnalyserPersistence">
            <runtimeParams class="gate.util.persistence.MapPersistence">
              <mapType>gate.util.SimpleFeatureMapImpl</mapType>
              <localMap>
                <entry>
                  <string>failOnMissingInputAnnotations</string>
                  <boolean>true</boolean>
                </entry>
                <entry>
                  <string>document</string>
                  <null />
                </entry>
                <entry>
                  <string>corpus</string>
                  <null />
                </entry>
                <entry>
                  <string>outputASName</string>
                  <null />
                </entry>
                <entry>
                  <string>inputASName</string>
                  <null />
                </entry>
                <entry>
                  <string>posTagAllTokens</string>
                  <boolean>true</boolean>
                </entry>
                <entry>
                  <string>baseTokenAnnotationType</string>
                  <string>Token</string>
                </entry>
                <entry>
                  <string>baseSentenceAnnotationType</string>
                  <string>Sentence</string>
                </entry>
                <entry>
                  <string>outputAnnotationType</string>
                  <string>Token</string>
                </entry>
              </localMap>
            </runtimeParams>
            <resourceType>gate.creole.POSTagger</resourceType>
            <resourceName>ANNIE POS Tagger</resourceName>
            <initParams class="gate.util.persistence.MapPersistence">
              <mapType>gate.util.SimpleFeatureMapImpl</mapType>
              <localMap>
                <entry>
                  <string>encoding</string>
                  <null />
                </entry>
                <entry>
                  <string>lexiconURL</string>
                  <gate.util.persistence.PersistenceManager-URLHolder>
                    <urlString>$relpath$plugins/ANNIE/resources/heptag/lexicon</urlString>
                  </gate.util.persistence.PersistenceManager-URLHolder>
                </entry>
                <entry>
                  <string>rulesURL</string>
                  <gate.util.persistence.PersistenceManager-URLHolder>
                    <urlString>$relpath$plugins/ANNIE/resources/heptag/ruleset</urlString>
                  </gate.util.persistence.PersistenceManager-URLHolder>
                </entry>
              </localMap>
            </initParams>
            <features class="gate.util.persistence.MapPersistence">
              <mapType>gate.util.SimpleFeatureMapImpl</mapType>
              <localMap />
            </features>
          </pr>
        </gate.util.persistence.AnalyserRunningStrategyPersistence>
        <gate.util.persistence.AnalyserRunningStrategyPersistence>
          <runMode>1</runMode>
          <featureName />
          <featureValue />
          <pr class="gate.util.persistence.LanguageAnalyserPersistence">
            <runtimeParams class="gate.util.persistence.MapPersistence">
              <mapType>gate.util.SimpleFeatureMapImpl</mapType>
              <localMap>
                <entry>
                  <string>enableDebugging</string>
                  <boolean>false</boolean>
                </entry>
                <entry>
                  <string>corpus</string>
                  <null />
                </entry>
                <entry>
                  <string>outputASName</string>
                  <null />
                </entry>
                <entry>
                  <string>inputASName</string>
                  <null />
                </entry>
                <entry>
                  <string>document</string>
                  <null />
                </entry>
              </localMap>
            </runtimeParams>
            <resourceType>info.semanticsoftware.munpex.MuNPExENTransducer</resourceType>
            <resourceName>MuNPEx English (EN) NP Chunker</resourceName>
            <initParams class="gate.util.persistence.MapPersistence">
              <mapType>gate.util.SimpleFeatureMapImpl</mapType>
              <localMap>
                <entry>
                  <string>annotationAccessors</string>
                  <null />
                </entry>
                <entry>
                  <string>grammarURL</string>
                  <gate.util.persistence.PersistenceManager-URLHolder>
                    <urlString>$relpath$plugins/TextMining-MuNPEx/resources/en-np_main.jape</urlString>
                  </gate.util.persistence.PersistenceManager-URLHolder>
                </entry>
                <entry>
                  <string>encoding</string>
                  <string>UTF-8</string>
                </entry>
                <entry>
                  <string>operators</string>
                  <null />
                </entry>
              </localMap>
            </initParams>
            <features class="gate.util.persistence.MapPersistence">
              <mapType>gate.util.SimpleFeatureMapImpl</mapType>
              <localMap />
            </features>
          </pr>
        </gate.util.persistence.AnalyserRunningStrategyPersistence>
        <gate.util.persistence.AnalyserRunningStrategyPersistence>
          <runMode>1</runMode>
          <featureName />
          <featureValue />
          <pr class="gate.util.persistence.PRPersistence">
            <runtimeParams class="gate.util.persistence.MapPersistence">
              <mapType>gate.util.SimpleFeatureMapImpl</mapType>
              <localMap>
                <entry>
                  <string>affixFeatureName</string>
                  <string>affix</string>
                </entry>
                <entry>
                  <string>annotationSetName</string>
                  <null />
                </entry>
                <entry>
                  <string>failOnMissingInputAnnotations</string>
                  <boolean>true</boolean>
                </entry>
                <entry>
                  <string>rootFeatureName</string>
                  <string>root</string>
                </entry>
                <entry>
                  <string>document</string>
                  <null />
                </entry>
                <entry>
                  <string>corpus</string>
                  <null />
                </entry>
                <entry>
                  <string>considerPOSTag</string>
                  <boolean>true</boolean>
                </entry>
              </localMap>
            </runtimeParams>
            <resourceType>gate.creole.morph.Morph</resourceType>
            <resourceName>GATE Morphological Analyzer</resourceName>
            <initParams class="gate.util.persistence.MapPersistence">
              <mapType>gate.util.SimpleFeatureMapImpl</mapType>
              <localMap>
                <entry>
                  <string>rulesFile</string>
                  <gate.util.persistence.PersistenceManager-URLHolder>
                    <urlString>$relpath$plugins/Tools/resources/morph/default.rul</urlString>
                  </gate.util.persistence.PersistenceManager-URLHolder>
                </entry>
                <entry>
                  <string>caseSensitive</string>
                  <boolean>false</boolean>
                </entry>
              </localMap>
            </initParams>
            <features class="gate.util.persistence.MapPersistence">
              <mapType>gate.util.SimpleFeatureMapImpl</mapType>
              <localMap />
            </features>
          </pr>
        </gate.util.persistence.AnalyserRunningStrategyPersistence>
        <gate.util.persistence.AnalyserRunningStrategyPersistence>
          <runMode>1</runMode>
          <featureName />
          <featureValue />
          <pr class="gate.util.persistence.LanguageAnalyserPersistence">
            <runtimeParams class="gate.util.persistence.MapPersistence">
              <mapType>gate.util.SimpleFeatureMapImpl</mapType>
              <localMap>
                <entry>
                  <string>enableDebugging</string>
                  <boolean>false</boolean>
                </entry>
                <entry>
                  <string>corpus</string>
                  <null />
                </entry>
                <entry>
                  <string>outputASName</string>
                  <null />
                </entry>
                <entry>
                  <string>inputASName</string>
                  <null />
                </entry>
                <entry>
                  <string>document</string>
                  <null />
                </entry>
              </localMap>
            </runtimeParams>
            <resourceType>gate.creole.ANNIETransducer</resourceType>
            <resourceName>ANNIE NE Transducer</resourceName>
            <initParams class="gate.util.persistence.MapPersistence">
              <mapType>gate.util.SimpleFeatureMapImpl</mapType>
              <localMap>
                <entry>
                  <string>annotationAccessors</string>
                  <null />
                </entry>
                <entry>
                  <string>grammarURL</string>
                  <gate.util.persistence.PersistenceManager-URLHolder>
                    <urlString>$relpath$plugins/ANNIE/resources/NE/main.jape</urlString>
                  </gate.util.persistence.PersistenceManager-URLHolder>
                </entry>
                <entry>
                  <string>encoding</string>
                  <string>UTF-8</string>
                </entry>
                <entry>
                  <string>operators</string>
                  <null />
                </entry>
              </localMap>
            </initParams>
            <features class="gate.util.persistence.MapPersistence">
              <mapType>gate.util.SimpleFeatureMapImpl</mapType>
              <localMap />
            </features>
          </pr>
        </gate.util.persistence.AnalyserRunningStrategyPersistence>
        <gate.util.persistence.AnalyserRunningStrategyPersistence>
          <runMode>1</runMode>
          <featureName />
          <featureValue />
          <pr class="gate.util.persistence.LanguageAnalyserPersistence">
            <runtimeParams class="gate.util.persistence.MapPersistence">
              <mapType>gate.util.SimpleFeatureMapImpl</mapType>
              <localMap>
                <entry>
                  <string>annotationSetName</string>
                  <null />
                </entry>
                <entry>
                  <string>corpus</string>
                  <null />
                </entry>
                <entry>
                  <string>annotationTypes</string>
                  <gate.util.persistence.CollectionPersistence>
                    <localList>
                      <string>Organization</string>
                      <string>Person</string>
                      <string>Location</string>
                      <string>Date</string>
                    </localList>
                    <collectionType>java.util.ArrayList</collectionType>
                  </gate.util.persistence.CollectionPersistence>
                </entry>
                <entry>
                  <string>document</string>
                  <null />
                </entry>
              </localMap>
            </runtimeParams>
            <resourceType>gate.creole.orthomatcher.OrthoMatcher</resourceType>
            <resourceName>ANNIE OrthoMatcher</resourceName>
            <initParams class="gate.util.persistence.MapPersistence">
              <mapType>gate.util.SimpleFeatureMapImpl</mapType>
              <localMap>
                <entry>
                  <string>organizationType</string>
                  <string>Organization</string>
                </entry>
                <entry>
                  <string>highPrecisionOrgs</string>
                  <boolean>false</boolean>
                </entry>
                <entry>
                  <string>extLists</string>
                  <boolean>true</boolean>
                </entry>
                <entry>
                  <string>definitionFileURL</string>
                  <gate.util.persistence.PersistenceManager-URLHolder>
                    <urlString>$relpath$plugins/ANNIE/resources/othomatcher/listsNM.def</urlString>
                  </gate.util.persistence.PersistenceManager-URLHolder>
                </entry>
                <entry>
                  <string>caseSensitive</string>
                  <boolean>false</boolean>
                </entry>
                <entry>
                  <string>minimumNicknameLikelihood</string>
                  <double>0.5</double>
                </entry>
                <entry>
                  <string>personType</string>
                  <string>Person</string>
                </entry>
                <entry>
                  <string>encoding</string>
                  <string>UTF-8</string>
                </entry>
                <entry>
                  <string>processUnknown</string>
                  <boolean>true</boolean>
                </entry>
              </localMap>
            </initParams>
            <features class="gate.util.persistence.MapPersistence">
              <mapType>gate.util.SimpleFeatureMapImpl</mapType>
              <localMap />
            </features>
          </pr>
        </gate.util.persistence.AnalyserRunningStrategyPersistence>
        <gate.util.persistence.AnalyserRunningStrategyPersistence>
          <runMode>1</runMode>
          <featureName />
          <featureValue />
          <pr class="gate.util.persistence.LanguageAnalyserPersistence">
            <runtimeParams class="gate.util.persistence.MapPersistence">
              <mapType>gate.util.SimpleFeatureMapImpl</mapType>
              <localMap>
                <entry>
                  <string>enableDebugging</string>
                  <boolean>false</boolean>
                </entry>
                <entry>
                  <string>corpus</string>
                  <null />
                </entry>
                <entry>
                  <string>outputASName</string>
                  <null />
                </entry>
                <entry>
                  <string>inputASName</string>
                  <null />
                </entry>
                <entry>
                  <string>ontology</string>
                  <null />
                </entry>
                <entry>
                  <string>document</string>
                  <null />
                </entry>
              </localMap>
            </runtimeParams>
            <resourceType>gate.creole.Transducer</resourceType>
            <resourceName>Author_Name_Transducer</resourceName>
            <initParams class="gate.util.persistence.MapPersistence">
              <mapType>gate.util.SimpleFeatureMapImpl</mapType>
              <localMap>
                <entry>
                  <string>binaryGrammarURL</string>
                  <null />
                </entry>
                <entry>
                  <string>annotationAccessors</string>
                  <null />
                </entry>
                <entry>
                  <string>grammarURL</string>
                  <gate.util.persistence.PersistenceManager-URLHolder>
                    <urlString>$relpath$application-resources/grammars/creator_uri.jape</urlString>
                  </gate.util.persistence.PersistenceManager-URLHolder>
                </entry>
                <entry>
                  <string>encoding</string>
                  <string>UTF-8</string>
                </entry>
                <entry>
                  <string>operators</string>
                  <null />
                </entry>
              </localMap>
            </initParams>
            <features class="gate.util.persistence.MapPersistence">
              <mapType>gate.util.SimpleFeatureMapImpl</mapType>
              <localMap />
            </features>
          </pr>
        </gate.util.persistence.AnalyserRunningStrategyPersistence>
        <gate.util.persistence.AnalyserRunningStrategyPersistence>
          <runMode>1</runMode>
          <featureName />
          <featureValue />
          <pr class="gate.util.persistence.PRPersistence">
            <runtimeParams class="gate.util.persistence.MapPersistence">
              <mapType>gate.util.SimpleFeatureMapImpl</mapType>
              <localMap>
                <entry>
                  <string>outputASName</string>
                  <null />
                </entry>
                <entry>
                  <string>inputASName</string>
                  <null />
                </entry>
                <entry>
                  <string>document</string>
                  <null />
                </entry>
              </localMap>
            </runtimeParams>
            <resourceType>gate.creole.gazetteer.FlexibleGazetteer</resourceType>
            <resourceName>Rhetector Flexible Gazetteer</resourceName>
            <initParams class="gate.util.persistence.MapPersistence">
              <mapType>gate.util.SimpleFeatureMapImpl</mapType>
              <localMap>
                <entry>
                  <string>inputFeatureNames</string>
                  <gate.util.persistence.CollectionPersistence>
                    <localList>
                      <string>Token.root</string>
                    </localList>
                    <collectionType>java.util.ArrayList</collectionType>
                  </gate.util.persistence.CollectionPersistence>
                </entry>
                <entry>
                  <string>gazetteerInst</string>
                  <gate.util.persistence.LanguageAnalyserPersistence>
                    <runtimeParams class="gate.util.persistence.MapPersistence">
                      <mapType>gate.util.SimpleFeatureMapImpl</mapType>
                      <localMap>
                        <entry>
                          <string>annotationSetName</string>
                          <null />
                        </entry>
                        <entry>
                          <string>corpus</string>
                          <null />
                        </entry>
                        <entry>
                          <string>document</string>
                          <null />
                        </entry>
                      </localMap>
                    </runtimeParams>
                    <resourceType>info.semanticsoftware.rhetector.gazetteer.REGazetteer</resourceType>
                    <resourceName>Rhetector Entity Gazetteer</resourceName>
                    <initParams class="gate.util.persistence.MapPersistence">
                      <mapType>gate.util.SimpleFeatureMapImpl</mapType>
                      <localMap>
                        <entry>
                          <string>listsURL</string>
                          <gate.util.persistence.PersistenceManager-URLHolder>
                            <urlString>$relpath$plugins/TextMining-Rhetector/resources/gazetteers/lists.def</urlString>
                          </gate.util.persistence.PersistenceManager-URLHolder>
                        </entry>
                        <entry>
                          <string>encoding</string>
                          <string>UTF-8</string>
                        </entry>
                        <entry>
                          <string>caseSensitive</string>
                          <boolean>true</boolean>
                        </entry>
                      </localMap>
                    </initParams>
                    <features class="gate.util.persistence.MapPersistence">
                      <mapType>gate.util.SimpleFeatureMapImpl</mapType>
                      <localMap />
                    </features>
                  </gate.util.persistence.LanguageAnalyserPersistence>
                </entry>
              </localMap>
            </initParams>
            <features class="gate.util.persistence.MapPersistence">
              <mapType>gate.util.SimpleFeatureMapImpl</mapType>
              <localMap />
            </features>
          </pr>
        </gate.util.persistence.AnalyserRunningStrategyPersistence>
        <gate.util.persistence.AnalyserRunningStrategyPersistence>
          <runMode>1</runMode>
          <featureName />
          <featureValue />
          <pr class="gate.util.persistence.LanguageAnalyserPersistence">
            <runtimeParams class="gate.util.persistence.MapPersistence">
              <mapType>gate.util.SimpleFeatureMapImpl</mapType>
              <localMap>
                <entry>
                  <string>enableDebugging</string>
                  <boolean>false</boolean>
                </entry>
                <entry>
                  <string>corpus</string>
                  <null />
                </entry>
                <entry>
                  <string>outputASName</string>
                  <null />
                </entry>
                <entry>
                  <string>inputASName</string>
                  <null />
                </entry>
                <entry>
                  <string>document</string>
                  <null />
                </entry>
              </localMap>
            </runtimeParams>
            <resourceType>info.semanticsoftware.rhetector.transducer.RETransducer</resourceType>
            <resourceName>Rhetector Entity Transducer</resourceName>
            <initParams class="gate.util.persistence.MapPersistence">
              <mapType>gate.util.SimpleFeatureMapImpl</mapType>
              <localMap>
                <entry>
                  <string>annotationAccessors</string>
                  <null />
                </entry>
                <entry>
                  <string>grammarURL</string>
                  <gate.util.persistence.PersistenceManager-URLHolder>
                    <urlString>$relpath$plugins/TextMining-Rhetector/resources/grammars/metadiscourse_detection/main.jape</urlString>
                  </gate.util.persistence.PersistenceManager-URLHolder>
                </entry>
                <entry>
                  <string>encoding</string>
                  <string>UTF-8</string>
                </entry>
                <entry>
                  <string>operators</string>
                  <null />
                </entry>
              </localMap>
            </initParams>
            <features class="gate.util.persistence.MapPersistence">
              <mapType>gate.util.SimpleFeatureMapImpl</mapType>
              <localMap />
            </features>
          </pr>
        </gate.util.persistence.AnalyserRunningStrategyPersistence>
        <gate.util.persistence.AnalyserRunningStrategyPersistence>
          <runMode>1</runMode>
          <featureName />
          <featureValue />
          <pr class="gate.util.persistence.PRPersistence">
            <runtimeParams class="gate.util.persistence.MapPersistence">
              <mapType>gate.util.SimpleFeatureMapImpl</mapType>
              <localMap>
                <entry>
                  <string>endpoint</string>
                  <string>http://localhost:2222/rest/annotate</string>
                </entry>
                <entry>
                  <string>confidence</string>
                  <double>0.1</double>
                </entry>
                <entry>
                  <string>document</string>
                  <null />
                </entry>
                <entry>
                  <string>corpus</string>
                  <null />
                </entry>
                <entry>
                  <string>outputAnnotationName</string>
                  <string>DBpediaLink</string>
                </entry>
                <entry>
                  <string>outputASName</string>
                  <string />
                </entry>
                <entry>
                  <string>support</string>
                  <int>10</int>
                </entry>
              </localMap>
            </runtimeParams>
            <resourceType>info.semanticsoftware.lodtagger.DBpediaTagger</resourceType>
            <resourceName>DBpediaTagger</resourceName>
            <initParams class="gate.util.persistence.MapPersistence">
              <mapType>gate.util.SimpleFeatureMapImpl</mapType>
              <localMap />
            </initParams>
            <features class="gate.util.persistence.MapPersistence">
              <mapType>gate.util.SimpleFeatureMapImpl</mapType>
              <localMap />
            </features>
          </pr>
        </gate.util.persistence.AnalyserRunningStrategyPersistence>
        <gate.util.persistence.AnalyserRunningStrategyPersistence>
          <runMode>1</runMode>
          <featureName />
          <featureValue />
          <pr class="gate.util.persistence.LanguageAnalyserPersistence">
            <runtimeParams class="gate.util.persistence.MapPersistence">
              <mapType>gate.util.SimpleFeatureMapImpl</mapType>
              <localMap>
                <entry>
                  <string>enableDebugging</string>
                  <boolean>false</boolean>
                </entry>
                <entry>
                  <string>corpus</string>
                  <null />
                </entry>
                <entry>
                  <string>outputASName</string>
                  <null />
                </entry>
                <entry>
                  <string>inputASName</string>
                  <null />
                </entry>
                <entry>
                  <string>ontology</string>
                  <null />
                </entry>
                <entry>
                  <string>document</string>
                  <null />
                </entry>
              </localMap>
            </runtimeParams>
            <resourceType>gate.creole.Transducer</resourceType>
            <resourceName>DBpediaNE_Filter</resourceName>
            <initParams class="gate.util.persistence.MapPersistence">
              <mapType>gate.util.SimpleFeatureMapImpl</mapType>
              <localMap>
                <entry>
                  <string>binaryGrammarURL</string>
                  <null />
                </entry>
                <entry>
                  <string>annotationAccessors</string>
                  <null />
                </entry>
                <entry>
                  <string>grammarURL</string>
                  <gate.util.persistence.PersistenceManager-URLHolder>
                    <urlString>$relpath$application-resources/grammars/dbpne_filter.jape</urlString>
                  </gate.util.persistence.PersistenceManager-URLHolder>
                </entry>
                <entry>
                  <string>encoding</string>
                  <string>UTF-8</string>
                </entry>
                <entry>
                  <string>operators</string>
                  <null />
                </entry>
              </localMap>
            </initParams>
            <features class="gate.util.persistence.MapPersistence">
              <mapType>gate.util.SimpleFeatureMapImpl</mapType>
              <localMap />
            </features>
          </pr>
        </gate.util.persistence.AnalyserRunningStrategyPersistence>
        <gate.util.persistence.AnalyserRunningStrategyPersistence>
          <runMode>1</runMode>
          <featureName />
          <featureValue />
          <pr class="gate.util.persistence.LanguageAnalyserPersistence">
            <runtimeParams class="gate.util.persistence.MapPersistence">
              <mapType>gate.util.SimpleFeatureMapImpl</mapType>
              <localMap>
                <entry>
                  <string>enableDebugging</string>
                  <boolean>false</boolean>
                </entry>
                <entry>
                  <string>corpus</string>
                  <null />
                </entry>
                <entry>
                  <string>outputASName</string>
                  <null />
                </entry>
                <entry>
                  <string>inputASName</string>
                  <null />
                </entry>
                <entry>
                  <string>ontology</string>
                  <null />
                </entry>
                <entry>
                  <string>document</string>
                  <null />
                </entry>
              </localMap>
            </runtimeParams>
            <resourceType>gate.jape.plus.Transducer</resourceType>
            <resourceName>Cleanup DBpediaNEs</resourceName>
            <initParams class="gate.util.persistence.MapPersistence">
              <mapType>gate.util.SimpleFeatureMapImpl</mapType>
              <localMap>
                <entry>
                  <string>binaryGrammarURL</string>
                  <null />
                </entry>
                <entry>
                  <string>annotationAccessors</string>
                  <null />
                </entry>
                <entry>
                  <string>grammarURL</string>
                  <gate.util.persistence.PersistenceManager-URLHolder>
                    <urlString>$relpath$application-resources/grammars/removedDBpediaNEs.jape</urlString>
                  </gate.util.persistence.PersistenceManager-URLHolder>
                </entry>
                <entry>
                  <string>encoding</string>
                  <string>UTF-8</string>
                </entry>
                <entry>
                  <string>operators</string>
                  <null />
                </entry>
              </localMap>
            </initParams>
            <features class="gate.util.persistence.MapPersistence">
              <mapType>gate.util.SimpleFeatureMapImpl</mapType>
              <localMap />
            </features>
          </pr>
        </gate.util.persistence.AnalyserRunningStrategyPersistence>
        <gate.util.persistence.AnalyserRunningStrategyPersistence>
          <runMode>1</runMode>
          <featureName />
          <featureValue />
          <pr class="gate.util.persistence.LanguageAnalyserPersistence">
            <runtimeParams class="gate.util.persistence.MapPersistence">
              <mapType>gate.util.SimpleFeatureMapImpl</mapType>
              <localMap>
                <entry>
                  <string>enableDebugging</string>
                  <boolean>false</boolean>
                </entry>
                <entry>
                  <string>corpus</string>
                  <null />
                </entry>
                <entry>
                  <string>outputASName</string>
                  <null />
                </entry>
                <entry>
                  <string>inputASName</string>
                  <string>Original markups</string>
                </entry>
                <entry>
                  <string>ontology</string>
                  <null />
                </entry>
                <entry>
                  <string>document</string>
                  <null />
                </entry>
              </localMap>
            </runtimeParams>
            <resourceType>gate.jape.plus.Transducer</resourceType>
            <resourceName>Remove PDFX-marked content</resourceName>
            <initParams class="gate.util.persistence.MapPersistence">
              <mapType>gate.util.SimpleFeatureMapImpl</mapType>
              <localMap>
                <entry>
                  <string>binaryGrammarURL</string>
                  <null />
                </entry>
                <entry>
                  <string>annotationAccessors</string>
                  <null />
                </entry>
                <entry>
                  <string>grammarURL</string>
                  <gate.util.persistence.PersistenceManager-URLHolder>
                    <urlString>$relpath$application-resources/grammars/ignoredContent.jape</urlString>
                  </gate.util.persistence.PersistenceManager-URLHolder>
                </entry>
                <entry>
                  <string>encoding</string>
                  <string>UTF-8</string>
                </entry>
                <entry>
                  <string>operators</string>
                  <null />
                </entry>
              </localMap>
            </initParams>
            <features class="gate.util.persistence.MapPersistence">
              <mapType>gate.util.SimpleFeatureMapImpl</mapType>
              <localMap />
            </features>
          </pr>
        </gate.util.persistence.AnalyserRunningStrategyPersistence>
        <gate.util.persistence.AnalyserRunningStrategyPersistence>
          <runMode>1</runMode>
          <featureName />
          <featureValue />
          <pr class="gate.util.persistence.PRPersistence">
            <runtimeParams class="gate.util.persistence.MapPersistence">
              <mapType>gate.util.SimpleFeatureMapImpl</mapType>
              <localMap>
                <entry>
                  <string>tagASName</string>
                  <null />
                </entry>
                <entry>
                  <string>textTagName</string>
                  <string>Ignored</string>
                </entry>
                <entry>
                  <string>transferAllUnlessFound</string>
                  <boolean>false</boolean>
                </entry>
                <entry>
                  <string>document</string>
                  <null />
                </entry>
                <entry>
                  <string>copyAnnotations</string>
                  <boolean>false</boolean>
                </entry>
                <entry>
                  <string>outputASName</string>
                  <string>Deleted</string>
                </entry>
                <entry>
                  <string>inputASName</string>
                  <null />
                </entry>
                <entry>
                  <string>annotationTypes</string>
                  <null />
                </entry>
              </localMap>
            </runtimeParams>
            <resourceType>gate.creole.annotransfer.AnnotationSetTransfer</resourceType>
            <resourceName>Remove Ignored Content</resourceName>
            <initParams class="gate.util.persistence.MapPersistence">
              <mapType>gate.util.SimpleFeatureMapImpl</mapType>
              <localMap />
            </initParams>
            <features class="gate.util.persistence.MapPersistence">
              <mapType>gate.util.SimpleFeatureMapImpl</mapType>
              <localMap />
            </features>
          </pr>
        </gate.util.persistence.AnalyserRunningStrategyPersistence>
        <gate.util.persistence.AnalyserRunningStrategyPersistence>
          <runMode>1</runMode>
          <featureName />
          <featureValue />
          <pr class="gate.util.persistence.LanguageAnalyserPersistence">
            <runtimeParams class="gate.util.persistence.MapPersistence">
              <mapType>gate.util.SimpleFeatureMapImpl</mapType>
              <localMap>
                <entry>
                  <string>enableDebugging</string>
                  <boolean>false</boolean>
                </entry>
                <entry>
                  <string>corpus</string>
                  <null />
                </entry>
                <entry>
                  <string>outputASName</string>
                  <null />
                </entry>
                <entry>
                  <string>inputASName</string>
                  <null />
                </entry>
                <entry>
                  <string>ontology</string>
                  <null />
                </entry>
                <entry>
                  <string>document</string>
                  <null />
                </entry>
              </localMap>
            </runtimeParams>
            <resourceType>gate.creole.Transducer</resourceType>
            <resourceName>Creator_Competency_Relation</resourceName>
            <initParams class="gate.util.persistence.MapPersistence">
              <mapType>gate.util.SimpleFeatureMapImpl</mapType>
              <localMap>
                <entry>
                  <string>binaryGrammarURL</string>
                  <null />
                </entry>
                <entry>
                  <string>annotationAccessors</string>
                  <null />
                </entry>
                <entry>
                  <string>grammarURL</string>
                  <gate.util.persistence.PersistenceManager-URLHolder>
                    <urlString>$relpath$application-resources/grammars/creator_competency_relation.jape</urlString>
                  </gate.util.persistence.PersistenceManager-URLHolder>
                </entry>
                <entry>
                  <string>encoding</string>
                  <string>UTF-8</string>
                </entry>
                <entry>
                  <string>operators</string>
                  <null />
                </entry>
              </localMap>
            </initParams>
            <features class="gate.util.persistence.MapPersistence">
              <mapType>gate.util.SimpleFeatureMapImpl</mapType>
              <localMap />
            </features>
          </pr>
        </gate.util.persistence.AnalyserRunningStrategyPersistence>
        <gate.util.persistence.AnalyserRunningStrategyPersistence>
          <runMode>1</runMode>
          <featureName />
          <featureValue />
          <pr class="gate.util.persistence.PRPersistence">
            <runtimeParams class="gate.util.persistence.MapPersistence">
              <mapType>gate.util.SimpleFeatureMapImpl</mapType>
              <localMap>
                <entry>
                  <string>inputASName</string>
                  <string />
                </entry>
                <entry>
                  <string>corpus</string>
                  <null />
                </entry>
                <entry>
                  <string>document</string>
                  <null />
                </entry>
              </localMap>
            </runtimeParams>
            <resourceType>info.semanticsoftware.lodexporter.LODexporter</resourceType>
            <resourceName>LODexporter</resourceName>
            <initParams class="gate.util.persistence.MapPersistence">
              <mapType>gate.util.SimpleFeatureMapImpl</mapType>
              <localMap>
                <entry>
                  <string>relationMappingSparql</string>
                  <string>SELECT ?rule ?type ?domain ?range ?GATEattribute WHERE { ?rule ?p &lt;map:Mapping&gt; . ?rule &lt;http://lod.semanticsoftware.info/mapping/mapping#type&gt; ?type . ?rule &lt;http://lod.semanticsoftware.info/mapping/mapping#domain&gt; ?domain . ?rule &lt;http://lod.semanticsoftware.info/mapping/mapping#range&gt; ?range . OPTIONAL {?rule &lt;http://lod.semanticsoftware.info/mapping/mapping#GATEattribute&gt; ?GATEattribute . }}</string>
                </entry>
                <entry>
                  <string>propertyMappingSparql</string>
                  <string>SELECT ?rule ?GATEtype ?GATEattribute ?GATEfeature ?type WHERE { ?rule ?p &lt;map:Mapping&gt; . ?rule &lt;http://lod.semanticsoftware.info/mapping/mapping#GATEtype&gt; ?GATEtype.?rule &lt;http://lod.semanticsoftware.info/mapping/mapping#hasMapping&gt; ?mapping .?mapping &lt;http://lod.semanticsoftware.info/mapping/mapping#type&gt; ?type . OPTIONAL {?mapping &lt;http://lod.semanticsoftware.info/mapping/mapping#GATEattribute&gt; ?GATEattribute . }OPTIONAL {?mapping &lt;http://lod.semanticsoftware.info/mapping/mapping#GATEfeature&gt; ?GATEfeature . }}</string>
                </entry>
                <entry>
                  <string>subjectMappingSparql</string>
                  <string>SELECT ?rule ?type ?baseURI ?GATEtype WHERE { ?rule ?p &lt;map:Mapping&gt; . ?rule &lt;http://lod.semanticsoftware.info/mapping/mapping#type&gt; ?type . ?rule &lt;http://lod.semanticsoftware.info/mapping/mapping#baseURI&gt; ?baseURI . ?rule &lt;http://lod.semanticsoftware.info/mapping/mapping#GATEtype&gt; ?GATEtype .} </string>
                </entry>
                <entry>
                  <string>rdfStoreDir</string>
                  <string>/tmp/tdb</string>
                </entry>
              </localMap>
            </initParams>
            <features class="gate.util.persistence.MapPersistence">
              <mapType>gate.util.SimpleFeatureMapImpl</mapType>
              <localMap />
            </features>
          </pr>
        </gate.util.persistence.AnalyserRunningStrategyPersistence>
      </localList>
      <collectionType>java.util.ArrayList</collectionType>
    </strategiesList>
    <prList class="gate.util.persistence.CollectionPersistence">
      <localList>
        <gate.util.persistence.PRPersistence reference="../../../strategiesList/localList/gate.util.persistence.AnalyserRunningStrategyPersistence/pr" />
        <gate.util.persistence.LanguageAnalyserPersistence reference="../../../strategiesList/localList/gate.util.persistence.AnalyserRunningStrategyPersistence[2]/pr" />
        <gate.util.persistence.LanguageAnalyserPersistence reference="../../../strategiesList/localList/gate.util.persistence.AnalyserRunningStrategyPersistence[3]/pr" />
        <gate.util.persistence.LanguageAnalyserPersistence reference="../../../strategiesList/localList/gate.util.persistence.AnalyserRunningStrategyPersistence[4]/pr" />
        <gate.util.persistence.LanguageAnalyserPersistence reference="../../../strategiesList/localList/gate.util.persistence.AnalyserRunningStrategyPersistence[5]/pr" />
        <gate.util.persistence.LanguageAnalyserPersistence reference="../../../strategiesList/localList/gate.util.persistence.AnalyserRunningStrategyPersistence[6]/pr" />
        <gate.util.persistence.PRPersistence reference="../../../strategiesList/localList/gate.util.persistence.AnalyserRunningStrategyPersistence[7]/pr" />
        <gate.util.persistence.LanguageAnalyserPersistence reference="../../../strategiesList/localList/gate.util.persistence.AnalyserRunningStrategyPersistence[8]/pr" />
        <gate.util.persistence.LanguageAnalyserPersistence reference="../../../strategiesList/localList/gate.util.persistence.AnalyserRunningStrategyPersistence[9]/pr" />
        <gate.util.persistence.LanguageAnalyserPersistence reference="../../../strategiesList/localList/gate.util.persistence.AnalyserRunningStrategyPersistence[10]/pr" />
        <gate.util.persistence.PRPersistence reference="../../../strategiesList/localList/gate.util.persistence.AnalyserRunningStrategyPersistence[11]/pr" />
        <gate.util.persistence.LanguageAnalyserPersistence reference="../../../strategiesList/localList/gate.util.persistence.AnalyserRunningStrategyPersistence[12]/pr" />
        <gate.util.persistence.PRPersistence reference="../../../strategiesList/localList/gate.util.persistence.AnalyserRunningStrategyPersistence[13]/pr" />
        <gate.util.persistence.LanguageAnalyserPersistence reference="../../../strategiesList/localList/gate.util.persistence.AnalyserRunningStrategyPersistence[14]/pr" />
        <gate.util.persistence.LanguageAnalyserPersistence reference="../../../strategiesList/localList/gate.util.persistence.AnalyserRunningStrategyPersistence[15]/pr" />
        <gate.util.persistence.LanguageAnalyserPersistence reference="../../../strategiesList/localList/gate.util.persistence.AnalyserRunningStrategyPersistence[16]/pr" />
        <gate.util.persistence.PRPersistence reference="../../../strategiesList/localList/gate.util.persistence.AnalyserRunningStrategyPersistence[17]/pr" />
        <gate.util.persistence.LanguageAnalyserPersistence reference="../../../strategiesList/localList/gate.util.persistence.AnalyserRunningStrategyPersistence[18]/pr" />
        <gate.util.persistence.PRPersistence reference="../../../strategiesList/localList/gate.util.persistence.AnalyserRunningStrategyPersistence[19]/pr" />
      </localList>
      <collectionType>java.util.ArrayList</collectionType>
    </prList>
    <resourceType>gate.creole.ConditionalSerialAnalyserController</resourceType>
    <resourceName>Semantic_Profiling</resourceName>
    <initParams class="gate.util.persistence.MapPersistence">
      <mapType>gate.util.SimpleFeatureMapImpl</mapType>
      <localMap />
    </initParams>
    <features class="gate.util.persistence.MapPersistence">
      <mapType>gate.util.SimpleFeatureMapImpl</mapType>
      <localMap>
        <entry>
          <string>gate.app.MetadataURL</string>
          <gate.util.persistence.PersistenceManager-URLHolder>
            <urlString>$relpath$plugins/ANNIE/.annie-defaults-metadata/metadata.xml</urlString>
          </gate.util.persistence.PersistenceManager-URLHolder>
        </entry>
        <entry>
          <string>gate.gui.icon</string>
          <string>annie-application</string>
        </entry>
      </localMap>
    </features>
  </application>
</gate.util.persistence.GateApplication>
